# Supplementary material for: RNA exosome mutations in pontocerebellar hypoplasia alter ribosome biogenesis and p53 levels
Source: Life Sci Alliance. 2020 Jun 11;3(8):e202000678. doi: 10.26508/lsa.202000678 (PMC7295610; doi:10.26508/lsa.202000678)
Supplement: Supplementary file 1 [file LSA-2020-00678_TableS1.xlsx]

## Sheet: SuppTab1 - Zebrafish DESeq2
								EXOSC3.1	DMSO.2										EXOSC3	EXOSC8 & 9 vs Controls						EXOSC8 vs Controls						EXOSC9 vs Controls
Row.names	CHROM	StartPos	EndPos	GeneName	GeneDescription	Phenotype	GO-TERMs	SRR7145922	SRR7145925	control-ZF1	control-ZF2	control-ZF3	exosc8-ZF1	exosc8-ZF2	exosc8-ZF3	exosc9-ZF1	exosc9-ZF2	exosc9-ZF3	LOG2	baseMean	log2FoldChange	lfcSE	stat	pvalue	padj	baseMean	log2FoldChange	lfcSE	stat	pvalue	padj	baseMean	log2FoldChange	lfcSE	stat	pvalue	padj
ENSDARG00000104155	1	3298112	3298249	dre-mir-17a-1	precursor microRNA 17a-1	.	.	3	1	4	13	19	153	138	191	120	65	109	1.58496	90.8094	1.84094	0.229457	8.02302	1.03177e-15	6.43153e-13	87.6715	3.00221	0.235904	12.7264	4.22045e-37	3.219e-34	51.8048	1.60609	0.209564	7.66395	1.80301e-14	4.96967e-12
ENSDARG00000096603	25	36292057	36310015	bmb	brambleberry	cell migration involved in gastrulation disrupted;karyomere part_of blastomere increased amount;karyomere part_of blastomere morphology;karyomere membrane fusion disrupted;pronucleus part_of cell present;karyomere part_of blastomere life span;blastoderm morphology;nucleus part_of blastomere lobate;pronuclear fusion disrupted;epiboly disrupted	A membrane-bounded organelle of eukaryotic cells in which chromosomes are housed and replicated. In most cells, the nucleus contains all of the cell's chromosomes except the organellar chromosomes, and is the site of RNA synthesis and processing. In some species, or in specialized cell types, RNA metabolism or DNA replication may be absent. [GOC:go_curators];"Either of the lipid bilayers that sur…	24	9	28	21	28	268	216	229	188	150	205	1.41504	148.546	2.20509	0.19972	11.0409	2.42567e-28	8.62044e-25	134.577	2.84551	0.200212	14.2124	7.66995e-46	1.02375e-42	98.05	1.93859	0.183933	10.5397	5.67071e-26	6.98764e-23
ENSDARG00000102375	5	43849529	43859166	si:ch211-204c21.1	BDP1 orthologue	.	A transcription factor complex that is involved in regulating transcription from RNA polymerase III (Pol III) promoters. TFIIIB contains the TATA-binding protein (TBP) and two Pol III-specific proteins, B'' and BRF. [GOC:mah, PMID:11433012];"The aggregation, arrangement and bonding together of proteins on promoter DNA to form the transcriptional preinitiation complex (PIC), the formation of which…	21	5	32	53	24	215	179	227	162	83	161	2.07039	127.217	1.38261	0.222975	6.20072	5.62052e-10	8.62204e-08	123.59	2.20748	0.208282	10.5985	3.02749e-26	9.50809e-24	82.5097	1.10434	0.202322	5.45833	4.80629e-08	4.49362e-06
ENSDARG00000092780	2	9746437	9748061	si:ch1073-170o4.1	uncharacterized LOC101886800	.	.	10	4	27	34	31	213	98	150	187	100	134	1.32193	107.138	1.58293	0.206999	7.64703	2.0567e-14	1.04417e-11	93.1808	1.95047	0.230331	8.46814	2.49346e-17	3.64728e-15	81.4624	1.4063	0.192878	7.29113	3.07371e-13	7.15424e-11
ENSDARG00000097815	5	69183255	69184273	CU928129.1	lincRNA	.	.	11	2	64	59	58	675	210	425	435	218	319	2.45943	272.758	1.31594	0.233345	5.63947	1.70574e-08	1.60227e-06	251.137	1.76769	0.287909	6.13977	8.26407e-10	4.37934e-08	182.7	1.71679	0.17722	9.68733	3.41325e-22	2.5536e-19
ENSDARG00000100513	25	34641536	34650374	CABZ01079011.1	ribosomal protein S27 like	apoptosis	The cellular metabolic process in which a protein is formed, using the sequence of a mature mRNA or circRNA molecule to specify the sequence of amino acids in a polypeptide chain. Translation is mediated by the ribosome, and begins with the formation of a ternary complex between aminoacylated initiator methionine tRNA, GTP, and initiation factor 2, which subsequently associates with the small sub…	21	11	587	502	539	2005	1337	1759	2113	1339	1950	0.932886	1331.55	1.45095	0.145341	9.98303	1.80865e-23	2.57106e-20	1132.54	1.63371	0.134776	12.1217	8.10678e-34	4.43919e-31	1128.3	1.34959	0.136841	9.8625	6.05252e-23	5.07153e-20
ENSDARG00000109652	1	7918795	7918882	RF00271	snoRNA	.	.	6	1	13	17	10	58	36	94	24	34	20	2.58496	34.4872	0.745265	0.23435	3.18014	0.00147204	0.0176339	37.9989	1.57092	0.272342	5.76818	8.01342e-09	3.52855e-07	19.2529	0.354069	0.213056	1.66186	0.0965415	0.45487
ENSDARG00000097737	3	55482160	55483481	si:dkey-188h10.3	si:dkey-188h10.3	.	.	11	1	62	65	54	237	124	221	193	141	169	3.45943	139.757	1.20653	0.189193	6.37724	1.80312e-10	3.12584e-08	127.848	1.51138	0.205295	7.36198	1.812e-13	1.6752e-11	110.309	1.01282	0.171432	5.90803	3.4623e-09	4.16829e-07
ENSDARG00000057010	19	24750466	24758109	si:dkey-154b15.1	si:dkey-154b15.1	.	.	26	6	103	96	89	380	181	294	231	149	215	2.11548	193.923	0.927668	0.209237	4.43357	9.26853e-06	0.00030173	191.762	1.43409	0.197762	7.25161	4.11845e-13	3.63445e-11	143.754	0.683096	0.167606	4.0756	4.58966e-05	0.00158132
ENSDARG00000035559	5	24086227	24097805	tp53	tumor protein p53	caudal fin malformed;neoplasm part_of whole organism increased amount;hepatocellular carcinoma part_of liver present;double-strand break repair via homologous recombination increased frequency;integument neoplastic;nucleate erythrocyte immature;neurofibrosarcoma part_of peripheral nervous system increased amount;post-vent region neoplastic;double-strand break repair via nonhomologous end joining …	Any biological process involved in the maintenance of the steady-state number of hematopoietic stem cells within a population of cells. [GOC:dph, PMID:21508411];"A mitotic cell cycle checkpoint that detects and negatively regulates progression through the G1/S transition of the cell cycle in response to DNA damage." [GOC:mtg_cell_cycle];"A protein complex that is capable of associating with DNA b…	75	14	222	325	334	717	778	847	920	811	969	2.42146	648.654	1.38079	0.11053	12.4924	8.21428e-36	5.83844e-32	541.649	1.42897	0.133781	10.6814	1.24328e-26	4.02295e-24	574.745	1.28945	0.126216	10.2163	1.67641e-24	1.75587e-21
ENSDARG00000014329	10	22034477	22045119	npm1a	nucleophosmin 1a	myeloid cell decreased amount	The process whose specific outcome is the progression of the myeloid and lymphoid derived organ/tissue systems of the blood and other parts of the body over time, from formation to the mature structure. The site of hemopoiesis is variable during development, but occurs primarily in bone marrow or kidney in many adult vertebrates. [GOC:dgh, ISBN:0198506732];"A small, dense body one or more of whic…	309	38	505	647	517	1572	992	1453	943	1055	1199	3.02354	987.559	0.897277	0.173054	5.18496	2.16056e-07	1.34707e-05	951.913	1.26398	0.14325	8.82362	1.10817e-18	1.89329e-16	794.312	0.670553	0.126237	5.31184	1.08527e-07	9.27924e-06
ENSDARG00000031795	19	30428913	30447743	abcf1	ATP-binding cassette, sub-family F (GCN20), member 1	.	Interacting selectively and non-covalently with a nucleotide, any compound consisting of a nucleoside that is esterified with (ortho)phosphate or an oligophosphate at any hydroxyl group on the ribose or deoxyribose. [GOC:mah, ISBN:0198547684];"Catalysis of the reaction: ATP + H2O = ADP + phosphate + 2 H+. May or may not be coupled to another reaction." [EC:3.6.1.3, GOC:jl];"Interacting selectivel…	717	106	901	1007	1010	2426	1774	2381	2369	1818	2330	2.75791	1764.62	1.03343	0.123212	8.3874	4.97023e-17	3.65449e-14	1590.1	1.2144	0.109918	11.0482	2.23638e-28	8.37897e-26	1529.68	0.895042	0.109721	8.15743	3.42236e-16	1.25775e-13
ENSDARG00000105682	7	51825557	51826238	BX957362.1	lincRNA	.	.	3	1	18	16	20	73	29	65	77	45	46	1.58496	42.5046	1.04076	0.218817	4.7563	1.97174e-06	8.34196e-05	36.8624	1.20149	0.268732	4.47095	7.78733e-06	0.000179209	35.5459	0.840384	0.20963	4.00889	6.10048e-05	0.00199365
ENSDARG00000033443	4	23125689	23136195	mdm2	MDM2 oncogene, E3 ubiquitin protein ligase	anterior-posterior axis part_of trunk shortened;epithelial cell part_of pronephric tubule amount;activation of cysteine-type endopeptidase activity involved in apoptotic process increased occurrence;regulation of canonical Wnt signaling pathway involved in heart development disrupted;pronephric tubule dilated;nucleus part_of central nervous system apoptotic;whole organism lethal (sensu genetics);…	Any process that stops, prevents, or reduces the frequency, rate or extent of cell death by apoptotic process. [GOC:jl, GOC:mtg_apoptosis];"All of the contents of a cell excluding the plasma membrane and nucleus, but including other subcellular structures." [ISBN:0198547684];"A membrane-bounded organelle of eukaryotic cells in which chromosomes are housed and replicated. In most cells, the nucleu…	10	2	159	194	220	375	390	551	670	450	535	2.32193	385.471	1.19447	0.133426	8.95231	3.48112e-19	3.374e-16	315.396	1.20106	0.149175	8.05134	8.18933e-16	9.80684e-14	357.624	1.17355	0.139709	8.39991	4.46836e-17	1.99156e-14
ENSDARG00000102087	16	54674556	54680189	pop1	.	.	Generation of the mature 5'-end of the tRNA, usually via an endonucleolytic cleavage by RNase P. [PMID:11592395];"The RNA metabolic process in which the phosphodiester bonds between ribonucleotides are cleaved by hydrolysis." [GOC:dph, GOC:tb];"Catalysis of the endonucleolytic cleavage of RNA, removing 5' extra nucleotides from tRNA precursor." [EC:3.1.26.5];"The chemical reactions and pathways i…	62	20	71	108	81	199	166	241	218	156	191	1.63227	157.809	0.954871	0.165918	5.75507	8.66084e-09	9.18781e-07	144.785	1.16845	0.18117	6.44943	1.12268e-10	7.00579e-09	133.763	0.745892	0.167819	4.44463	8.80449e-06	0.000407145
ENSDARG00000017835	13	33368140	33449639	brf1a	BRF1, RNA polymerase III transcription initiation factor a	blood island has fewer parts of type;thrombocyte decreased amount	Interacting selectively and non-covalently with any metal ion. [GOC:ai];"The aggregation, arrangement and bonding together of proteins on promoter DNA to form the transcriptional preinitiation complex (PIC), the formation of which is a prerequisite for transcription." [GOC:jp, GOC:txnOH];"Any process that modulates the frequency, rate or extent of cellular DNA-templated transcription." [GOC:go_cu…	56	15	126	164	157	397	230	390	323	252	321	1.90046	260.565	0.88867	0.169654	5.23813	1.62211e-07	1.06099e-05	244.07	1.15208	0.17108	6.73417	1.64863e-11	1.16583e-09	218.283	0.70293	0.144479	4.86528	1.14295e-06	7.16843e-05
ENSDARG00000090337	13	12007904	12021566	pprc1	peroxisome proliferator-activated receptor gamma, coactivator-related 1	.	Interacting selectively and non-covalently with an RNA molecule or a portion thereof. [GOC:jl, GOC:mah];"Any process that activates or increases the frequency, rate or extent of transcription from an RNA polymerase II promoter." [GOC:go_curators, GOC:txnOH];"Interacting selectively and non-covalently with a regulatory transcription factor and also with the basal transcription machinery in order t…	382	48	436	391	349	913	681	1023	815	720	904	2.99247	688.879	0.927328	0.148509	6.24426	4.25819e-10	6.77592e-08	635.073	1.15096	0.142546	8.07433	6.78469e-16	8.27964e-14	589.447	0.758753	0.13134	5.777	7.60424e-09	8.25356e-07
ENSDARG00000102353	3	1378098	1388936	ddx47	.	.	Interacting selectively and non-covalently with ATP, adenosine 5'-triphosphate, a universally important coenzyme and enzyme regulator. [ISBN:0198506732];"The part of a cell, extracellular environment or virus in which a gene product is located. A gene product may be located in one or more parts of a cell and its location may be as specific as a particular macromolecular complex, that is, a stable…	135	55	308	295	263	665	559	640	704	510	673	1.29546	509.748	0.961942	0.134495	7.15224	8.53738e-13	3.19373e-10	458.782	1.12665	0.132994	8.47144	2.42387e-17	3.56994e-15	447.554	0.813445	0.136685	5.95122	2.66151e-09	3.31865e-07
ENSDARG00000030700	19	16015881	16031503	ctps1a	CTP synthase 1a	.	Catalysis of the joining of two substances, or two groups within a single molecule, with the concomitant hydrolysis of the diphosphate bond in ATP or a similar triphosphate. [EC:6, GOC:mah];"The chemical reactions and pathways resulting in the formation of a pyrimidine nucleotide, a compound consisting of nucleoside (a pyrimidine base linked to a deoxyribose or ribose sugar) esterified with a pho…	224	40	504	541	527	1206	935	1179	1240	870	1161	2.48543	900.582	0.930964	0.130508	7.13338	9.79318e-13	3.60035e-10	819.438	1.12065	0.113177	9.90176	4.09002e-23	9.92573e-21	787.067	0.779403	0.123678	6.30185	2.9412e-10	4.36967e-08
ENSDARG00000105208	2	56891858	56911005	zgc:85843	zgc:85843	.	The component of a membrane consisting of the gene products and protein complexes having at least some part of their peptide sequence embedded in the hydrophobic region of the membrane. [GOC:dos, GOC:go_curators];"The actions of a single gene product or complex at the molecular level consisting of a single biochemical activity or multiple causally linked biochemical activities. A given gene produ…	46	3	60	87	87	172	144	206	172	171	203	3.9386	142.95	1.01412	0.146226	6.93532	4.05291e-12	1.20335e-09	126.16	1.1159	0.181717	6.14089	8.20621e-10	4.3595e-08	126.204	0.845556	0.164291	5.14669	2.65124e-07	2.08008e-05
ENSDARG00000093874	13	5570952	5574014	si:dkey-196j8.2	.	.	.	10	1	102	101	73	298	138	214	283	187	202	3.32193	175.663	0.9436	0.188826	4.9972	5.81685e-07	2.99336e-05	155.297	1.1098	0.212153	5.23114	1.68465e-07	5.57788e-06	153.498	0.858899	0.170572	5.0354	4.76844e-07	3.42087e-05
ENSDARG00000088002	4	16447485	16451375	wu:fc23c09	podocan-like protein 1	.	A layer consisting mainly of proteins (especially collagen) and glycosaminoglycans (mostly as proteoglycans) that forms a sheet underlying or overlying cells such as endothelial and epithelial cells. The proteins are secreted by cells in the vicinity. An example of this component is found in Mus musculus. [GOC:mtg_sensu, ISBN:0198547684];"That part of a multicellular organism outside the cells pr…	78	2	7	3	7	19	20	29	23	29	25	5.2854	17.6904	1.13885	0.229596	4.96023	7.04106e-07	3.49969e-05	14.2956	1.09511	0.29508	3.71125	0.000206239	0.00297598	14.9875	0.76089	0.209923	3.62462	0.000289386	0.00718254
ENSDARG00000057648	8	15277874	15286309	dnttip2	deoxynucleotidyltransferase, terminal, interacting protein 2	.	.	262	44	906	776	808	1933	1333	1918	1970	1450	1910	2.57399	1431.64	0.924881	0.134518	6.87553	6.17592e-12	1.78203e-09	1284.13	1.07557	0.13144	8.18298	2.76902e-16	3.56236e-14	1271.75	0.810886	0.124538	6.51114	7.45822e-11	1.25996e-08
ENSDARG00000096834	19	20191887	20199167	si:ch211-155k24.9	.	.	.	22	8	242	170	274	620	331	506	817	418	575	1.45943	430.441	0.966857	0.18002	5.37083	7.83752e-08	5.72327e-06	357.847	1.04837	0.181001	5.79205	6.95345e-09	3.10016e-07	401.765	0.975231	0.166387	5.86122	4.59482e-09	5.28858e-07
ENSDARG00000096639	20	19543262	19545552	BX276101.1	processed transcript	.	.	12	5	127	82	129	247	174	305	198	193	227	1.26303	186.143	0.767825	0.181582	4.22854	2.35218e-05	0.000656485	177.331	1.04311	0.188911	5.52167	3.35789e-08	1.28977e-06	156.224	0.553297	0.163663	3.3807	0.000723013	0.015176
ENSDARG00000088805	16	29043813	29057849	nes	nestin	optic tectum decreased size;axon part_of hindbrain disorganized;cranial nerve X position;midbrain disorganized;cranial nerve IV decreased size;cranial nerve VII decreased size;tectal ventricle dilated;glial cell decreased amount;photoreceptor cell part_of retina disorganized;cranial nerve V decreased size;cranial nerve VII disorganized;brain hydrocephalic;midbrain apoptotic;cranial nerve X morpho…	The action of a molecule that contributes to the structural integrity of a complex or its assembly within or outside a cell. [GOC:mah, GOC:vw];"The process whose specific outcome is the progression of nervous tissue over time, from its formation to its mature state." [GOC:dgh];"Any process that stops, prevents, or reduces the frequency, rate or extent of cell death by apoptotic process." [GOC:jl,…	152	21	294	313	398	722	551	718	499	473	500	2.85561	498.032	0.635308	0.173916	3.65296	0.000259239	0.00454586	500.167	1.02614	0.127703	8.03532	9.33335e-16	1.10123e-13	406.206	0.329987	0.118618	2.78193	0.00540372	0.072146
ENSDARG00000031774	25	235992	244424	pus7	pseudouridylate synthase 7 (putative)	.	The intramolecular conversion of uridine to pseudouridine within an RNA molecule. This posttranscriptional base modification occurs in tRNA, rRNA, and snRNAs. [GOC:hjd, GOC:mah];"The covalent alteration of one or more nucleotides within an RNA molecule to produce an RNA molecule with a sequence that differs from that coded genetically." [GOC:go_curators, ISBN:1555811337];"Interacting selectively …	210	60	218	291	261	517	466	527	488	420	472	1.80735	405.462	0.78525	0.137313	5.71867	1.07363e-08	1.08497e-06	381.832	1.01032	0.130234	7.75771	8.64783e-15	9.32742e-13	350.732	0.584117	0.126792	4.6069	4.0872e-06	0.000215123
ENSDARG00000071669	14	22498757	22523799	smyd5	SMYD family member 5	granulocyte increased amount;macrophage increased amount;hematopoietic stem cell part_of ventral wall of dorsal aorta increased amount;common myeloid progenitor increased amount	A first transient wave of blood cell production that, in vertebrates, gives rise to erythrocytes (red blood cells) and myeloid cells. [GOC:bf, GOC:dph, PMID:15378083, PMID:15617691];"The actions of a single gene product or complex at the molecular level consisting of a single biochemical activity or multiple causally linked biochemical activities. A given gene product may exhibit one or more mole…	28	12	92	108	105	232	186	192	188	163	219	1.22239	164.631	0.791097	0.157178	5.03311	4.82577e-07	2.5725e-05	153.551	0.995969	0.169271	5.88388	4.00755e-09	1.87076e-07	142.751	0.591112	0.158637	3.72618	0.000194405	0.0052856
ENSDARG00000078442	2	58345157	58374842	AL954696.1	NOP9 nucleolar protein	.	Interacting selectively and non-covalently with an RNA molecule or a portion thereof. [GOC:jl, GOC:mah]	68	16	118	104	102	253	165	222	248	160	208	2.08746	174.558	0.764431	0.166238	4.59842	4.25704e-06	0.000161518	161.436	0.957036	0.177269	5.39879	6.70912e-08	2.44505e-06	153.36	0.592783	0.164028	3.61391	0.00030161	0.00743309
ENSDARG00000026090	12	288108	290815	adprm	ADP-ribose/CDP-alcohol diphosphatase, manganese-dependent	.	Catalysis of the hydrolysis of various bonds, e.g. C-O, C-N, C-C, phosphoric anhydride bonds, etc. Hydrolase is the systematic name for any enzyme of EC class 3. [ISBN:0198506732]	7	2	59	51	61	95	123	125	174	105	165	1.80735	104.713	0.954079	0.171216	5.57236	2.51315e-08	2.16955e-06	86.3644	0.946543	0.203461	4.65221	3.28397e-06	8.15494e-05	99.3063	0.895477	0.181814	4.92523	8.42607e-07	5.47757e-05
ENSDARG00000098507	14	32964	34751	lyar	.	.	The part of a cell, extracellular environment or virus in which a gene product is located. A gene product may be located in one or more parts of a cell and its location may be as specific as a particular macromolecular complex, that is, a stable, persistent association of macromolecules that function together. [GOC:go_curators, NIF_Subcellular:sao-1337158144]	175	22	85	92	99	211	117	219	187	139	168	2.99178	145.218	0.718196	0.175547	4.09118	4.29177e-05	0.00107033	136.835	0.938161	0.192414	4.87574	1.08402e-06	3.0421e-05	125.585	0.53379	0.16078	3.32001	0.000900142	0.0179925
ENSDARG00000043960	20	150890	154989	rpf2	ribosome production factor 2 homolog	.	Interacting selectively and non-covalently with ribosomal RNA. [GOC:jl];"Any process involved in the maturation of a precursor Large SubUnit (LSU) ribosomal RNA (rRNA) molecule into a mature LSU-rRNA molecule from the pre-rRNA molecule originally produced as a tricistronic rRNA transcript that contains the Small Subunit (SSU) rRNA, 5.8S rRNA, and Large Subunit (LSU) in that order from 5' to 3' al…	181	33	302	281	286	567	468	581	570	413	480	2.45545	437.558	0.693246	0.144794	4.7878	1.68618e-06	7.27823e-05	415.981	0.93151	0.127791	7.28933	3.11492e-13	2.79505e-11	381.708	0.491359	0.131475	3.73728	0.00018602	0.00511385
ENSDARG00000024561	13	4973211	4992395	nolc1	nucleolar and coiled-body phosphoprotein 1	palatoquadrate cartilage decreased size;cell part_of head apoptotic;liver quality;chondrocyte part_of cranial cartilage disorganized;central region part_of retina apoptotic;ceratohyal cartilage malformed;brain hypoplastic;anterior-most region part_of head truncated;ethmoid cartilage decreased size;gut quality;optic primordium malformed;eye decreased size;whole organism amount;cranial cartilage hy…	The process in which the anatomical structures of the cranial skeleton are generated and organized during the embryonic phase. [GOC:dsf, GOC:jid, PMID:16049113]	520	158	513	492	453	958	808	924	812	803	843	1.71859	733.286	0.701655	0.134567	5.21417	1.84646e-07	1.1859e-05	695.572	0.924837	0.122351	7.55887	4.06575e-14	4.0013e-12	642.083	0.508616	0.114885	4.42717	9.54781e-06	0.000432917
ENSDARG00000094128	5	49734238	49743095	CR751602.1	.	.	.	9	4	168	152	185	419	220	328	399	303	317	1.16993	273.634	0.800633	0.15643	5.11816	3.08537e-07	1.80245e-05	245.642	0.919124	0.177627	5.17446	2.28574e-07	7.42562e-06	247.579	0.715923	0.139261	5.14086	2.73491e-07	2.13772e-05
ENSDARG00000079257	21	36366872	36439977	gemin5	gem (nuclear organelle) associated protein 5	T cell part_of thymus decreased amount;lymphoid progenitor cell part_of thymus decreased amount;anatomical structure increased amount;T cell part_of thymus absent;fat cell differentiation decreased occurrence	The process in which a precursor cell type acquires characteristics of a more mature T-cell. A T cell is a type of lymphocyte whose definin characteristic is the expression of a T cell receptor complex. [GO_REF:0000022, GOC:jid, GOC:mah, GOC:mtg_15nov05]	104	21	229	276	337	494	419	622	424	437	505	2.30812	413.75	0.661669	0.150148	4.40679	1.04915e-05	0.000334396	395.198	0.899869	0.13992	6.43133	1.26493e-10	7.83008e-09	360.972	0.458087	0.130757	3.50333	0.000459476	0.0105554
ENSDARG00000020494	1	53266504	53277660	znf330	.	.	Interacting selectively and non-covalently with zinc (Zn) ions. [GOC:ai];"A membrane-bounded organelle of eukaryotic cells in which chromosomes are housed and replicated. In most cells, the nucleus contains all of the cell's chromosomes except the organellar chromosomes, and is the site of RNA synthesis and processing. In some species, or in specialized cell types, RNA metabolism or DNA replicati…	77	16	175	235	209	398	265	480	393	370	459	2.26679	327.204	0.783889	0.143948	5.44564	5.16186e-08	4.04656e-06	292.671	0.883024	0.164095	5.38119	7.3997e-08	2.67844e-06	299.744	0.697248	0.136692	5.10086	3.38107e-07	2.52952e-05
ENSDARG00000010316	8	46353203	46386060	qars	.	gut quality;apoptotic process occurs_in brain increased process quality;pericardium edematous;liver hypoplastic;heart quality;liver quality;anterior region part_of hindbrain decreased size;eye decreased size;apoptotic process occurs_in eye increased process quality;anterior-most region part_of head decreased size;gut hypoplastic	Catalysis of the reaction: ATP + L-glutamine + tRNA(Gln) = AMP + diphosphate + L-glutaminyl-tRNA(Gln). [EC:6.1.1.18];"Interacting selectively and non-covalently with ATP, adenosine 5'-triphosphate, a universally important coenzyme and enzyme regulator." [ISBN:0198506732];"All of the contents of a cell excluding the plasma membrane and nucleus, but including other subcellular structures." [ISBN:01…	103	43	687	814	877	1501	1175	1513	1444	1153	1451	1.26024	1172	0.693325	0.123569	5.61082	2.01368e-08	1.82714e-06	1095.25	0.876752	0.108032	8.11563	4.83252e-16	6.00019e-14	1049.51	0.534077	0.110796	4.82037	1.43295e-06	8.52767e-05
ENSDARG00000015676	15	1653779	1672461	nmd3	NMD3 ribosome export adaptor	eye decreased size;heart quality;liver quality;head quality;gut quality	Interacting selectively and non-covalently with any part of the larger ribosomal subunit. [GOC:go_curators];"The directed movement of a ribosomal large subunit from the nucleus into the cytoplasm." [GOC:mah];"All of the contents of a cell excluding the plasma membrane and nucleus, but including other subcellular structures." [ISBN:0198547684];"That part of the nuclear content other than the chrom…	109	53	608	533	559	1134	815	1097	1339	953	1137	1.04026	897.535	0.802484	0.120691	6.64909	2.94916e-11	6.41684e-09	793.371	0.875765	0.128729	6.80317	1.02343e-11	7.48505e-10	834.831	0.732896	0.124539	5.88488	3.98353e-09	4.71452e-07
ENSDARG00000091931	16	29025292	29030674	gpatch4	G patch domain containing 4	.	Any process specifically pertinent to the functioning of integrated living units: cells, tissues, organs, and organisms. A process is a collection of molecular events with a defined beginning and end. [GOC:go_curators, GOC:isa_complete];"Interacting selectively and non-covalently with any nucleic acid." [GOC:jl];"The part of a cell, extracellular environment or virus in which a gene product is lo…	118	10	252	259	240	496	337	530	488	366	552	3.56071	387.531	0.731449	0.147406	4.96213	6.97231e-07	3.47728e-05	352.479	0.874742	0.148009	5.91008	3.41942e-09	1.62639e-07	352.38	0.614813	0.143326	4.28961	1.78988e-05	0.000722435
ENSDARG00000040070	3	36119782	36127234	coil	coilin p80	Cajal body part_of cell decreased amount;cell proliferation decreased occurrence;mRNA cis splicing via spliceosome decreased occurrence;Cajal body organization decreased process quality;embryo development arrested;cell part_of whole organism apoptotic;cell part_of whole organism dead;small nuclear ribonucleoprotein complex part_of cell dispersed;spliceosomal snRNP assembly decreased process quali…	A process that is carried out at the cellular level which results in the assembly, arrangement of constituent parts, or disassembly of Cajal bodies, nuclear bodies that appear ultrastructurally as a tangle of coiled, electron-dense threads roughly 0.5 micrometers in diameter and are enriched in ribonucleoproteins, and certain general RNA polymerase II transcription factors. [GOC:mah, PMID:1103123…	42	2	69	73	95	166	114	160	134	141	156	4.39232	122.141	0.726643	0.155105	4.68485	2.80166e-06	0.000112717	112.78	0.872226	0.187508	4.65168	3.29247e-06	8.1664e-05	108.875	0.547529	0.166262	3.29316	0.000990669	0.0195103
ENSDARG00000105195	21	11179914	11199366	dnajc21	DnaJ (Hsp40) homolog, subfamily C, member 21	.	Interacting selectively and non-covalently with any metal ion. [GOC:ai];"Interacting selectively and non-covalently with any nucleic acid." [GOC:jl];"Interacting selectively and non-covalently with zinc (Zn) ions." [GOC:ai]	115	9	147	188	153	293	222	370	285	277	296	3.67557	245.87	0.69665	0.146048	4.77002	1.84207e-06	7.87145e-05	228.488	0.857601	0.164849	5.20234	1.96797e-07	6.44599e-06	220.055	0.541177	0.140369	3.85539	0.000115547	0.00348271
ENSDARG00000100505	21	38855551	38869404	ddx52	DEAD (Asp-Glu-Ala-Asp) box polypeptide 52	.	Interacting selectively and non-covalently with any nucleic acid. [GOC:jl];"Interacting selectively and non-covalently with ATP, adenosine 5'-triphosphate, a universally important coenzyme and enzyme regulator." [ISBN:0198506732]	87	23	230	229	241	472	375	384	424	332	444	1.91938	346.786	0.674862	0.140476	4.80412	1.55436e-06	6.80569e-05	323.696	0.852049	0.141357	6.02765	1.66356e-09	8.33969e-08	310.875	0.515996	0.134577	3.8342	0.000125972	0.00371671
ENSDARG00000037158	16	34185613	34195002	rcc1	regulator of chromosome condensation 1	.	The part of a cell, extracellular environment or virus in which a gene product is located. A gene product may be located in one or more parts of a cell and its location may be as specific as a particular macromolecular complex, that is, a stable, persistent association of macromolecules that function together. [GOC:go_curators, NIF_Subcellular:sao-1337158144];"Any process specifically pertinent t…	68	22	186	212	183	367	308	350	314	311	398	1.62803	290.859	0.695664	0.136159	5.10922	3.23495e-07	1.87443e-05	268.932	0.8513	0.142571	5.97107	2.35699e-09	1.1466e-07	262.627	0.540496	0.142747	3.78639	0.000152852	0.00435216
ENSDARG00000100095	5	65022287	65037525	anxa1b	annexin A1b	.	Any process that stops or reduces the activity of an enzyme. [GOC:ebc, GOC:jl, GOC:tb, GOC:vw];"Stops, prevents or reduces the activity of a phospholipase, an enzyme that catalyzes of the hydrolysis of a phospholipid." [GOC:ai, GOC:rl];"Interacting selectively and non-covalently with phospholipids, a class of lipids containing phosphoric acid as a mono- or diester, in the presence of calcium." [G…	73	28	77	79	104	120	262	114	153	259	153	1.38247	146.489	0.706272	0.211547	3.3386	0.00084201	0.011487	128.6	0.844858	0.238619	3.54061	0.000399202	0.00520942	133.68	0.721035	0.177749	4.05647	4.98197e-05	0.00168871
ENSDARG00000098935	21	226351	233282	bxdc2	brix domain containing 2	.	.	176	38	201	257	223	420	360	397	439	371	404	2.2115	339.01	0.709602	0.117691	6.02936	1.64613e-09	2.15035e-07	310.892	0.830402	0.138163	6.0103	1.85176e-09	9.19679e-08	309.304	0.572051	0.129522	4.41662	1.00255e-05	0.000448757
ENSDARG00000016484	21	43702010	43716471	dkc1	dyskeratosis congenita 1, dyskerin	definitive hemopoiesis decreased process quality;rRNA processing decreased process quality;heart edematous;hematopoietic stem cell decreased amount;hemoglobin complex part_of nucleate erythrocyte decreased amount;anterior-most region part_of head decreased size;regulation of signal transduction by p53 class mediator increased process quality;eye decreased size	Any process involved in forming the mature 3' end of a box H/ACA snoRNA molecule. [GOC:krc];"The intramolecular conversion of uridine to pseudouridine in an snRNA molecule." [GOC:mah];"The intramolecular conversion of uridine to pseudouridine in an mRNA molecule." [PMID:25192136];"Any process involved in the conversion of a primary ribosomal RNA (rRNA) transcript into one or more mature rRNA mole…	508	51	844	834	717	1523	1185	1413	1405	1297	1394	3.31626	1173.98	0.669265	0.122587	5.45952	4.77415e-08	3.77034e-06	1091.29	0.823434	0.125965	6.53701	6.27619e-11	4.03718e-09	1063.88	0.527014	0.113416	4.64675	3.37209e-06	0.000182529
ENSDARG00000105273	19	18832318	18844395	FP074902.2	si:ch73-295i22.2	.	.	26	4	86	96	101	161	139	201	197	155	202	2.70044	146.797	0.761614	0.136612	5.57503	2.47483e-08	2.15756e-06	130.588	0.823362	0.173646	4.7416	2.12036e-06	5.50882e-05	136.223	0.646053	0.158778	4.06892	4.72318e-05	0.00161933
ENSDARG00000022410	13	31343326	31370184	rrp12	ribosomal RNA processing 12 homolog	.	Any process specifically pertinent to the functioning of integrated living units: cells, tissues, organs, and organisms. A process is a collection of molecular events with a defined beginning and end. [GOC:go_curators, GOC:isa_complete]	310	90	1545	1538	1562	2944	2080	2917	2982	2207	2885	1.78427	2277.55	0.674492	0.124754	5.40657	6.42421e-08	4.80644e-06	2099.67	0.821561	0.114721	7.16137	7.9872e-13	6.62008e-11	2079.92	0.553366	0.11273	4.90878	9.16446e-07	5.87086e-05
ENSDARG00000051785	5	1965296	1991634	dhx33	DEAH (Asp-Glu-Ala-His) box polypeptide 33	eye decreased size;3'5'-cyclic AMP part_of whole organism decreased amount;anterior-most region part_of head decreased size;embryo development delayed;heart edematous;whole organism decreased life span	Catalysis of the reaction: ATP + H2O = ADP + phosphate; this reaction drives the unwinding of an RNA helix. [EC:3.6.1.3, GOC:jl];"Catalysis of the reaction: NTP + H2O = NDP + phosphate, to drive the unwinding of a DNA or RNA helix." [GOC:mah, ISBN:0198506732];"Interacting selectively and non-covalently with ATP, adenosine 5'-triphosphate, a universally important coenzyme and enzyme regulator." [I…	101	15	94	160	164	243	206	281	289	233	263	2.75132	211.998	0.729294	0.140934	5.17471	2.28261e-07	1.40265e-05	190.822	0.81653	0.172047	4.74597	2.0751e-06	5.41097e-05	195.311	0.607565	0.156046	3.8935	9.88064e-05	0.00302602
ENSDARG00000104938	22	3184500	3214544	ftsj3	FtsJ RNA methyltransferase homolog 3	.	Catalysis of the transfer of a methyl group from S-adenosyl-L-methionine to a nucleoside residue in an rRNA molecule. [GOC:mah];"A membrane-bounded organelle of eukaryotic cells in which chromosomes are housed and replicated. In most cells, the nucleus contains all of the cell's chromosomes except the organellar chromosomes, and is the site of RNA synthesis and processing. In some species, or in …	305	54	348	394	324	688	508	620	629	510	648	2.49778	516.429	0.638601	0.13623	4.68767	2.76331e-06	0.000111595	482.075	0.804288	0.137296	5.85807	4.6827e-09	2.16458e-07	467.595	0.48921	0.129698	3.7719	0.000162006	0.00456144
ENSDARG00000028688	5	72137331	72143292	exosc2	exosome component 2	.	Any process involved in forming the mature 3' end of a snoRNA molecule linked to prior polyadenylation of the 3'-end of the precursor snoRNA. [GOC:dgf, GOC:krc, PMID:18951092];"The chemical reactions and pathways resulting in the breakdown of the transcript body of a nuclear-transcribed mRNA that occurs when the ends are not protected by the 3'-poly(A) tail." [GOC:mtg_mpo];"A ribonuclease complex…	51	23	90	135	125	219	185	198	215	197	242	1.14886	176.82	0.721323	0.135448	5.32545	1.00701e-07	7.13372e-06	159.086	0.80036	0.169778	4.71415	2.42721e-06	6.23022e-05	163.511	0.599564	0.155601	3.85321	0.000116578	0.00349367
ENSDARG00000101954	11	2198831	2204754	hoxc6b	homeobox C6b	.	The biological process whose specific outcome is the progression of a multicellular organism over time from an initial condition (e.g. a zygote or a young adult) to a later condition (e.g. a multicellular animal or an aged adult). [GOC:dph, GOC:ems, GOC:isa_complete, GOC:tb];"Any process that modulates the frequency, rate or extent of cellular DNA-templated transcription." [GOC:go_curators, GOC:t…	52	8	135	141	172	321	179	276	318	204	255	2.70044	220.138	0.636918	0.163849	3.88723	0.000101395	0.00216854	203.616	0.794396	0.175164	4.53515	5.75622e-06	0.000135535	199.688	0.508882	0.153103	3.32379	0.000888021	0.0178525
ENSDARG00000078214	5	8712798	8765428	mybbp1a	MYB binding protein (P160) 1a	pericardium edematous;trunk necrotic;heart quality;eye decreased size;gut hypoplastic;yolk grey;anterior-most region part_of head decreased size;liver increased size;brain necrotic;hindbrain quality;gut quality;fourth ventricle distended;anterior region part_of trunk decreased thickness;liver quality;yolk circular;central nervous system necrotic	The cellular synthesis of RNA on a template of DNA. [GOC:jl, GOC:txnOH];"The cellular DNA metabolic process resulting in the formation of DNA, deoxyribonucleic acid, one of the two main types of nucleic acid, consisting of a long unbranched macromolecule formed from one or two strands of linked deoxyribonucleotides, the 3'-phosphate group of each constituent deoxyribonucleotide being joined in 3'…	477	112	563	638	557	1105	782	1075	1071	849	1125	2.09049	856.188	0.658745	0.128101	5.14239	2.71267e-07	1.62023e-05	787.628	0.793958	0.127478	6.22822	4.71759e-10	2.60333e-08	786.009	0.540458	0.12235	4.41731	9.99383e-06	0.000448757
ENSDARG00000104708	17	53296851	53304886	ddx24	DEAD (Asp-Glu-Ala-Asp) box helicase 24	.	Interacting selectively and non-covalently with ATP, adenosine 5'-triphosphate, a universally important coenzyme and enzyme regulator. [ISBN:0198506732];"Catalysis of the hydrolysis of various bonds, e.g. C-O, C-N, C-C, phosphoric anhydride bonds, etc. Hydrolase is the systematic name for any enzyme of EC class 3." [ISBN:0198506732];"Catalysis of the reaction: NTP + H2O = NDP + phosphate, to driv…	264	72	274	307	316	481	419	598	587	481	577	1.87447	443.586	0.710694	0.106764	6.65669	2.80055e-11	6.22222e-09	398.757	0.783998	0.128717	6.09088	1.1229e-09	5.80655e-08	414.525	0.620754	0.120432	5.15437	2.54483e-07	2.01166e-05
ENSDARG00000052480	1	49435017	49481173	pdcd11	programmed cell death 11	.	Interacting selectively and non-covalently with any nucleic acid. [GOC:jl];"A small, dense body one or more of which are present in the nucleus of eukaryotic cells. It is rich in RNA and protein, is not bounded by a limiting membrane, and is not seen during mitosis. Its prime function is the transcription of the nucleolar DNA into 45S ribosomal-precursor RNA, the processing of this RNA into 5.8S,…	595	159	1183	1242	1114	2131	1656	2077	2249	1889	2167	1.90386	1730.51	0.68598	0.102999	6.66006	2.7371e-11	6.20886e-09	1571.47	0.780696	0.113011	6.90813	4.91091e-12	3.74562e-10	1609.48	0.590118	0.106282	5.55237	2.81829e-08	2.83834e-06
ENSDARG00000063627	19	2930132	3056235	bop1	.	.	A membrane-bounded organelle of eukaryotic cells in which chromosomes are housed and replicated. In most cells, the nucleus contains all of the cell's chromosomes except the organellar chromosomes, and is the site of RNA synthesis and processing. In some species, or in specialized cell types, RNA metabolism or DNA replication may be absent. [GOC:go_curators];"Any process involved in the maturatio…	307	71	240	297	286	478	422	459	494	413	498	2.11235	395.919	0.65517	0.114224	5.73583	9.70365e-09	1.00442e-06	364.723	0.777307	0.128251	6.06085	1.35406e-09	6.86871e-08	364.097	0.522637	0.125392	4.16801	3.07272e-05	0.00113323
ENSDARG00000105286	5	72194444	72207275	ddx54	DEAD (Asp-Glu-Ala-Asp) box polypeptide 54	central nervous system necrotic;brain necrotic;anterior-most region part_of head decreased size;liver hypoplastic;gut hypoplastic;eye decreased size	Interacting selectively and non-covalently with any nucleic acid. [GOC:jl];"A small, dense body one or more of which are present in the nucleus of eukaryotic cells. It is rich in RNA and protein, is not bounded by a limiting membrane, and is not seen during mitosis. Its prime function is the transcription of the nucleolar DNA into 45S ribosomal-precursor RNA, the processing of this RNA into 5.8S,…	277	105	335	365	337	592	479	643	558	491	583	1.3995	484.863	0.587819	0.128039	4.59093	4.41268e-06	0.000166829	458.987	0.770669	0.125163	6.15731	7.39891e-10	3.97013e-08	438.084	0.416771	0.120396	3.46166	0.000536864	0.0120668
ENSDARG00000045372	24	14541013	14557158	ngdn	neuroguidin, EIF4E binding protein	.	.	61	22	162	185	170	328	227	307	359	278	326	1.47131	257.217	0.701828	0.124493	5.63748	1.72558e-08	1.60607e-06	230.036	0.762667	0.154052	4.95072	7.39392e-07	2.13673e-05	241.319	0.616161	0.138189	4.45883	8.24099e-06	0.000387068
ENSDARG00000098660	14	52573476	52583021	CU469526.1	thiosulfate sulfurtransferase like domain containing 2	.	.	74	14	155	173	160	263	236	311	280	241	286	2.4021	232.413	0.620665	0.127685	4.86091	1.16848e-06	5.3238e-05	216.571	0.761895	0.147746	5.15678	2.51234e-07	8.06819e-06	212.136	0.464035	0.139804	3.31919	0.000902794	0.0180283
ENSDARG00000101877	11	44617021	44637842	rbm34	RNA binding motif protein 34	.	Interacting selectively and non-covalently with an RNA molecule or a portion thereof. [GOC:jl, GOC:mah];"The part of a cell, extracellular environment or virus in which a gene product is located. A gene product may be located in one or more parts of a cell and its location may be as specific as a particular macromolecular complex, that is, a stable, persistent association of macromolecules that f…	84	14	230	240	230	464	288	412	459	344	452	2.58496	343.091	0.659393	0.138163	4.77256	1.81898e-06	7.80405e-05	310.841	0.756399	0.153857	4.91624	8.82217e-07	2.51208e-05	319.438	0.570902	0.135237	4.2215	2.42685e-05	0.000927693
ENSDARG00000040730	9	41120158	41156972	wdr75	WD repeat domain 75	brain necrotic;midbrain hindbrain boundary quality;central nervous system necrotic;anterior-most region part_of head decreased size;gut hypoplastic;eye decreased size;upper region part_of head flattened;gut quality;midbrain hindbrain boundary condensed	A cellular process that results in the biosynthesis of constituent macromolecules, assembly, and arrangement of constituent parts of ribosome subunits; includes transport to the sites of protein synthesis. [GOC:ma, PMID:26404467, Wikipedia:Ribosome_biogenesis];"The cellular synthesis of RNA on a template of DNA." [GOC:jl, GOC:txnOH];"Any process that modulates the frequency, rate or extent of cel…	168	31	575	525	540	931	741	999	923	751	961	2.43812	767.665	0.588729	0.126509	4.65365	3.26115e-06	0.000128298	719.544	0.750499	0.120702	6.2178	5.04169e-10	2.76787e-08	701.688	0.441573	0.120769	3.65635	0.000255836	0.00654365
ENSDARG00000043666	8	8483664	8489886	abt1	activator of basal transcription 1	.	Endonucleolytic cleavage within the 5'-External Transcribed Spacer (ETS) of a tricistronic rRNA transcript that contains the Small Subunit (SSU) rRNA, the 5.8S rRNA, and the Large Subunit (LSU) rRNA in that order from 5' to 3' along the primary transcript. Endonucleolytic cleavage within the 5'-ETS of the pre-RNA is conserved as one of the early steps of rRNA processing in all eukaryotes, but the…	89	7	154	198	161	321	212	316	344	247	311	3.66838	248.949	0.637251	0.144091	4.42255	9.75437e-06	0.000314064	226.861	0.741677	0.163602	4.53341	5.80387e-06	0.000136356	231.146	0.530195	0.147695	3.58981	0.000330921	0.00804191
ENSDARG00000023299	12	10443785	10447178	snu13b	SNU13 homolog, small nuclear ribonucleoprotein b (U4/U6.U5)	somite development disrupted	The joining together of exons from one or more primary transcripts of messenger RNA (mRNA) and the excision of intron sequences, via a spliceosomal mechanism, so that mRNA consisting only of the joined exons is produced. [GOC:krc, ISBN:0198506732, ISBN:0879695897];"A cellular process that results in the biosynthesis of constituent macromolecules, assembly, and arrangement of constituent parts of …	62	16	403	424	314	697	490	681	753	524	653	1.9542	544.878	0.596352	0.147004	4.0567	4.97706e-05	0.00121148	502.81	0.73057	0.152	4.80639	1.5368e-06	4.13348e-05	503.488	0.479896	0.143132	3.35283	0.000799908	0.0164332
ENSDARG00000040277	16	25259313	25272633	fbxo32	F-box protein 32	mitochondrion part_of skeletal muscle morphology;heart decreased functionality;mitochondrion part_of cardiac muscle cell morphology;dystroglycan complex part_of skeletal muscle disorganized;heart contraction decreased rate;myofilament part_of skeletal muscle disorganized;mitochondrial crista part_of skeletal muscle decreased amount;pericardium edematous;heart contraction decreased efficacy;thigmo…	Locomotory behavior in a larval (immature) organism. [GOC:ai];"The process in which the anatomical structures of muscle tissue are generated and organized. Muscle tissue consists of a set of cells that are part of an organ and carry out a contractive function." [GOC:dph];"The process in which the anatomical structures of cardiac muscle tissue are generated and organized." [GOC:devbiol];"The cellu…	11	4	328	207	257	859	271	650	1104	365	925	1.45943	538.283	0.669668	0.234147	2.86003	0.00423597	0.0388659	428.832	0.728867	0.290792	2.50649	0.0121938	0.0778505	512.777	0.568646	0.210502	2.70138	0.00690524	0.0857954
ENSDARG00000037109	1	28898945	28950366	pwp2h	.	posterior chamber swim bladder uninflated;exocrine pancreas decreased size;epithelial cell part_of intestine cuboid;head malformed;eye decreased size;cell proliferation process quality;intestinal villus sparse;liver decreased size;ribosomal small subunit assembly disrupted;ribosome biogenesis disrupted;intestinal epithelium decreased thickness;cell part_of whole organism dead;autolysosome part_of…	A cellular process that results in the biosynthesis of constituent macromolecules, assembly, and arrangement of constituent parts of ribosome subunits; includes transport to the sites of protein synthesis. [GOC:ma, PMID:26404467, Wikipedia:Ribosome_biogenesis];"The aggregation, arrangement and bonding together of constituent RNAs and proteins to form the small ribosomal subunit." [GOC:jl];"Intera…	59	10	251	282	264	489	336	462	496	418	550	2.56071	389.662	0.674306	0.121852	5.53382	3.13332e-08	2.60983e-06	347.4	0.728739	0.141382	5.15441	2.54433e-07	8.15865e-06	369.228	0.610314	0.130447	4.67864	2.88787e-06	0.000158364
ENSDARG00000022232	3	54553931	54567961	ppan	peter pan homolog (Drosophila)	.	Interacting selectively and non-covalently with ribosomal RNA. [GOC:jl];"The aggregation, arrangement and bonding together of constituent RNAs and proteins to form the large ribosomal subunit." [GOC:jl];"A preribosomal complex consisting of 27SA, 27SB, and/or 7S pre-rRNA, 5S rRNA, ribosomal proteins including late-associating large subunit proteins, and associated proteins; a precursor of the euk…	246	25	417	454	382	670	547	794	754	598	760	3.29866	592.23	0.607345	0.124604	4.87419	1.09256e-06	5.07416e-05	544.104	0.720058	0.13301	5.41358	6.17763e-08	2.25906e-06	551.432	0.498081	0.127097	3.91889	8.8956e-05	0.00276887
ENSDARG00000102241	21	44505613	44512893	zgc:136410	zgc:136410	.	Interacting selectively and non-covalently with any carbohydrate, which includes monosaccharides, oligosaccharides and polysaccharides as well as substances derived from monosaccharides by reduction of the carbonyl group (alditols), by oxidation of one or more hydroxy groups to afford the corresponding aldehydes, ketones, or carboxylic acids, or by replacement of one or more hydroxy group(s) by a…	61	1	35	43	46	47	91	79	154	145	144	5.93074	84.0934	0.953591	0.208662	4.57003	4.87654e-06	0.000180525	57.2497	0.719772	0.24084	2.98859	0.00280264	0.0250642	90.6639	1.28575	0.174818	7.35477	1.9125e-13	4.71329e-11
ENSDARG00000089787	10	29265463	29268723	crebzf	CREB/ATF bZIP transcription factor	.	Interacting selectively and non-covalently with a specific DNA sequence (sometimes referred to as a motif) within the regulatory region of a gene in order to modulate transcription. [GOC:curators, GOC:txnOH];"Any process that modulates the frequency, rate or extent of cellular DNA-templated transcription." [GOC:go_curators, GOC:txnOH]	178	31	1334	1349	1393	3434	1368	2646	3040	2070	2237	2.52154	2075.2	0.66163	0.17757	3.72603	0.000194522	0.00361688	1916.93	0.715893	0.253566	2.8233	0.00475323	0.0383057	1862.45	0.594729	0.117745	5.05099	4.39518e-07	3.21924e-05
ENSDARG00000008740	1	51202984	51219965	esf1	ESF1, nucleolar pre-rRNA processing protein, homolog (S. cerevisiae)	.	A membrane-bounded organelle of eukaryotic cells in which chromosomes are housed and replicated. In most cells, the nucleus contains all of the cell's chromosomes except the organellar chromosomes, and is the site of RNA synthesis and processing. In some species, or in specialized cell types, RNA metabolism or DNA replication may be absent. [GOC:go_curators]	230	29	232	223	209	402	251	430	424	334	420	2.98751	321.318	0.630543	0.14167	4.4508	8.55528e-06	0.000282391	290.726	0.715387	0.162669	4.39781	1.0935e-05	0.000240751	301.377	0.553566	0.136573	4.05326	5.05084e-05	0.00170929
ENSDARG00000038768	3	50054187	50066528	mrpl12	mitochondrial ribosomal protein L12	.	The living contents of a cell; the matter contained within (but not including) the plasma membrane, usually taken to exclude large vacuoles and masses of secretory or ingested material. In eukaryotes it includes the nucleus and cytoplasm. [ISBN:0198506732];"An intracellular organelle, about 200 A in diameter, consisting of RNA and protein. It is the site of protein biosynthesis resulting from tra…	61	22	456	436	493	759	718	695	926	738	781	1.47131	661.073	0.650217	0.0992386	6.55205	5.67508e-11	1.09018e-08	595.623	0.712675	0.119669	5.95539	2.59447e-09	1.25043e-07	625.166	0.575114	0.112481	5.11298	3.17112e-07	2.40683e-05
ENSDARG00000099742	12	9619909	9700605	heatr1	HEAT repeat containing 1	heart quality;pericardium edematous;otic lateral line neuromast decreased amount;yolk grey;anterior-most region part_of head decreased size;neuron part_of brain necrotic;gut hypoplastic;eye decreased size;lateral line truncated;brain necrotic;midbrain hindbrain boundary quality;liver hypoplastic;erythroblast decreased amount;gut quality;anterior region part_of trunk decreased thickness;brain qual…	.	45	9	282	270	229	460	341	450	449	409	419	2.32193	365.523	0.581472	0.129044	4.50599	6.60635e-06	0.0002298	339.628	0.706744	0.148891	4.7467	2.06758e-06	5.39794e-05	337.861	0.450761	0.132265	3.408	0.000654412	0.0140457
ENSDARG00000077264	17	24821627	24835683	wdr43	WD repeat domain 43	pharyngeal arch physical object quality;neuroectoderm part_of retina necrotic;dorsal region part_of neural tube necrotic;hematopoietic stem cell differentiation disrupted;hematopoietic stem cell part_of ventral wall of dorsal aorta absent;activation of cysteine-type endopeptidase activity involved in apoptotic process increased occurrence;intersegmental vessel aplastic;common lymphoid progenitor …	The process in which a relatively unspecialized cell acquires specialized features of a hematopoietic stem cell. A stem cell is a cell that retains the ability to divide and proliferate throughout life to provide progenitor cells that can differentiate into specialized cells. [GOC:bf, GOC:BHF, GOC:dph, GOC:rl, PMID:15378083];"A cellular process that results in the biosynthesis of constituent macr…	362	117	1594	1340	1358	2446	1814	2555	2681	2061	2424	1.62948	2014.2	0.59157	0.1239	4.77457	1.80094e-06	7.75787e-05	1853.81	0.706065	0.127617	5.53268	3.15375e-08	1.21573e-06	1878.69	0.488349	0.119321	4.09272	4.26347e-05	0.001491
ENSDARG00000017675	18	14619544	14633308	utp4	UTP4, small subunit processome component	long-chain fatty acid metabolic process disrupted;bile canaliculus spheroid;bile ductule sparse;bile canaliculus decreased branchiness;lipid storage occurs_in gall bladder disrupted;hepaticobiliary system process disrupted;bile canaliculus decreased length;rough endoplasmic reticulum part_of hepatocyte increased amount;liver decreased size;yolk increased size	An system process carried out by any of the organs or tissues of the hepaticobiliary system. The hepaticobiliary system is responsible for metabolic and catabolic processing of small molecules absorbed from the blood or gut, hormones and serum proteins, detoxification, storage of glycogen, triglycerides, metals and lipid soluble vitamins and excretion of bile. Included are the synthesis of albumi…	73	36	569	455	439	951	589	816	948	640	857	1.0199	691.364	0.566936	0.155434	3.64745	0.000264855	0.00463653	638.39	0.702523	0.157994	4.44651	8.7275e-06	0.000198071	641.345	0.464058	0.143003	3.2451	0.00117411	0.0224
ENSDARG00000030789	9	38314466	38352220	ddx18	.	intersegmental vessel hypoplastic;cell part_of whole organism dead;hematopoietic stem cell part_of dorsal aorta decreased amount;mitotic G1 phase arrested;head decreased width;midbrain hindbrain boundary condensed;hematopoietic stem cell part_of blood island decreased amount;gut hypoplastic;myeloid cell decreased amount;anterior-most region part_of head decreased size;extension shortened;eye decr…	A small, dense body one or more of which are present in the nucleus of eukaryotic cells. It is rich in RNA and protein, is not bounded by a limiting membrane, and is not seen during mitosis. Its prime function is the transcription of the nucleolar DNA into 45S ribosomal-precursor RNA, the processing of this RNA into 5.8S, 18S, and 28S components of ribosomal RNA, and the association of these comp…	230	41	1056	884	920	1661	1215	1605	1589	1266	1539	2.48794	1298.29	0.526199	0.132854	3.96074	7.47174e-05	0.00169309	1226.02	0.690369	0.128398	5.37681	7.58166e-08	2.72582e-06	1192.95	0.379783	0.120046	3.16363	0.00155812	0.0275905
ENSDARG00000104353	6	9664206	9695294	nop58	NOP58 ribonucleoprotein homolog (yeast)	eye necrotic;gut quality;liver hypoplastic;liver quality;yolk circular;post-vent region curved ventral;extension decreased thickness;central nervous system necrotic;nervous system quality;fourth ventricle distended;anterior region part_of trunk decreased thickness;brain quality;forebrain quality;midbrain hindbrain boundary condensed;pericardium edematous;head necrotic;heart quality;midbrain hindb…	.	850	96	1030	954	1053	1666	1266	1779	1682	1522	1659	3.14636	1390.26	0.568503	0.105642	5.38143	7.3895e-08	5.45212e-06	1290.65	0.687658	0.113663	6.04996	1.44886e-09	7.31487e-08	1295.4	0.453607	0.098899	4.58657	4.50582e-06	0.000233633
ENSDARG00000007216	23	43695036	43718067	abce1	ATP-binding cassette, sub-family E (OABP), member 1	liver hypoplastic;heart quality;pericardium edematous;gut quality;anterior-most region part_of head decreased size;gut hypoplastic;eye decreased size;liver quality	Interacting selectively and non-covalently with a nucleotide, any compound consisting of a nucleoside that is esterified with (ortho)phosphate or an oligophosphate at any hydroxyl group on the ribose or deoxyribose. [GOC:mah, ISBN:0198547684];"Interacting selectively and non-covalently with any part of the small ribosomal subunit." [GOC:go_curators];"The process resulting in the release of a poly…	519	185	1947	2160	1981	3303	2749	3302	3297	2767	3259	1.48821	2738.31	0.533589	0.11005	4.84859	1.24344e-06	5.6117e-05	2577.96	0.685419	0.0997905	6.86858	6.48429e-12	4.91058e-10	2530.83	0.391369	0.101247	3.86547	0.000110876	0.00335157
ENSDARG00000007531	10	42898103	42903716	zcchc9	.	.	The part of a cell, extracellular environment or virus in which a gene product is located. A gene product may be located in one or more parts of a cell and its location may be as specific as a particular macromolecular complex, that is, a stable, persistent association of macromolecules that function together. [GOC:go_curators, NIF_Subcellular:sao-1337158144];"Interacting selectively and non-cova…	25	12	123	132	141	237	178	208	250	190	228	1.05889	185.831	0.596424	0.129887	4.59185	4.39338e-06	0.000166394	170.074	0.685389	0.160737	4.26404	2.00762e-05	0.000408331	173.905	0.480795	0.147757	3.25396	0.00113809	0.0219124
ENSDARG00000070477	4	1766333	1785120	dnajc2	DnaJ (Hsp40) homolog, subfamily C, member 2	.	The cellular synthesis of RNA on a template of DNA. [GOC:jl, GOC:txnOH];"Interacting selectively and non-covalently with chromatin, the network of fibers of DNA, protein, and sometimes RNA, that make up the chromosomes of the eukaryotic nucleus during interphase." [GOC:jl, ISBN:0198506732, PMID:20404130];"The part of the cytoplasm that does not contain organelles but which does contain other part…	222	29	221	243	284	416	335	405	371	364	395	2.93643	335.316	0.526729	0.121159	4.34741	1.37752e-05	0.000419013	317.203	0.683035	0.132601	5.15106	2.59022e-07	8.29338e-06	307.94	0.366078	0.124395	2.94286	0.00325196	0.0491147
ENSDARG00000002487	12	5399680	5418340	noc3l	NOC3-like DNA replication regulator	cartilaginous joint part_of mandibular arch skeleton morphology;digestive tract development disrupted;macrophage mislocalised;yolk grey;epithelial cell part_of somite morphology;presumptive neural retina decreased size;heart quality;neutrophil mislocalised;mandibular muscle aplastic;muscle degenerate;peripheral region part_of retina morphology;whole organism mobility;anatomical axis part_of whole…	The process whose specific outcome is the progression of the muscle over time, from its formation to the mature structure. The muscle is an organ consisting of a tissue made up of various elongated cells that are specialized to contract and thus to produce movement and mechanical work. [GOC:jid, ISBN:0198506732];"A membrane-bounded organelle of eukaryotic cells in which chromosomes are housed and…	145	23	485	461	451	806	574	795	765	669	704	2.65635	631.052	0.526675	0.125176	4.20749	2.58221e-05	0.000708628	595.724	0.681692	0.130976	5.20469	1.94321e-07	6.37469e-06	580.871	0.381131	0.113343	3.36262	0.000772057	0.0160129
ENSDARG00000091831	6	57436314	57476465	ddx27	DEAD (Asp-Glu-Ala-Asp) box polypeptide 27	yolk circular;liver quality;extension decreased thickness;fourth ventricle distended;anterior region part_of trunk decreased thickness;brain quality;eye decreased size;gut hypoplastic;anterior-most region part_of head decreased size;yolk grey;trunk decreased length;gut quality;pericardium edematous;heart quality;liver hypoplastic	Interacting selectively and non-covalently with ATP, adenosine 5'-triphosphate, a universally important coenzyme and enzyme regulator. [ISBN:0198506732];"The process in which a secondary structure of RNA are broken or 'melted'." [PMID:17169986];"All of the contents of a cell excluding the plasma membrane and nucleus, but including other subcellular structures." [ISBN:0198547684];"Interacting sele…	355	75	692	657	606	1117	850	1068	1204	994	1157	2.24286	919.119	0.608174	0.109398	5.55927	2.70902e-08	2.31058e-06	833.773	0.681688	0.125574	5.42859	5.68013e-08	2.09146e-06	869.841	0.529209	0.116721	4.53395	5.78914e-06	0.000289429
ENSDARG00000020077	17	51682429	51720803	nol10	nucleolar protein 10	liver quality;yolk swollen;nervous system quality;central nervous system necrotic;brain quality;forebrain quality;gut quality;liver hypoplastic;midbrain hindbrain boundary quality;forebrain pointed;anatomical system quality;yolk quality;eye decreased size;gut hypoplastic;anterior-most region part_of head decreased size;midbrain hindbrain boundary condensed;pericardium edematous;heart quality	A membrane-bounded organelle of eukaryotic cells in which chromosomes are housed and replicated. In most cells, the nucleus contains all of the cell's chromosomes except the organellar chromosomes, and is the site of RNA synthesis and processing. In some species, or in specialized cell types, RNA metabolism or DNA replication may be absent. [GOC:go_curators]	238	95	367	394	409	648	513	637	650	582	710	1.32496	540.861	0.591162	0.102678	5.75744	8.53987e-09	9.10478e-07	494.864	0.678935	0.118598	5.72468	1.03628e-08	4.45287e-07	509.53	0.49338	0.116071	4.25067	2.13136e-05	0.000836101
ENSDARG00000103337	9	145093	153070	rrp1	.	yolk quality;eye decreased size;yolk grey;anterior-most region part_of head decreased size;gut hypoplastic;whole organism shape;midbrain hindbrain boundary quality;pericardium edematous;heart quality;midbrain hindbrain boundary condensed;trunk atrophied;brain quality;anterior region part_of trunk decreased thickness;fourth ventricle distended;whole organism viability;yolk circular;liver quality;n…	Any process involved in the conversion of a primary ribosomal RNA (rRNA) transcript into one or more mature rRNA molecules. [GOC:curators];"A preribosomal complex consisting of 27SA, 27SB, and/or 7S pre-rRNA, 5S rRNA, ribosomal proteins including late-associating large subunit proteins, and associated proteins; a precursor of the eukaryotic cytoplasmic large ribosomal subunit." [PMID:10567516];"A…	496	108	332	363	378	625	453	573	857	627	855	2.19931	551.091	0.758463	0.126293	6.00561	1.90619e-09	2.46338e-07	454.007	0.675636	0.127963	5.27993	1.29233e-07	4.41585e-06	553.554	0.838911	0.126399	6.63699	3.20159e-11	5.83191e-09
ENSDARG00000102997	3	36589427	36602500	rrn3	RRN3 homolog, RNA polymerase I transcription factor	.	.	44	12	442	455	415	753	583	686	800	646	698	1.87447	604.368	0.571913	0.112377	5.08925	3.59483e-07	2.0225e-05	557.2	0.675253	0.126921	5.32028	1.0361e-07	3.60374e-06	566.4	0.464882	0.117679	3.95041	7.80181e-05	0.00246877
ENSDARG00000012044	19	24545731	24555949	polr3gla	polymerase (RNA) III (DNA directed) polypeptide G like a	.	The ordered and organized complex of DNA, protein, and sometimes RNA, that forms the chromosome in the nucleus. [GOC:elh, PMID:20404130];"Catalysis of the reaction: nucleoside triphosphate + RNA(n) = diphosphate + RNA(n+1). Utilizes a DNA template, i.e. the catalysis of DNA-template-directed extension of the 3'-end of an RNA strand by one nucleotide at a time. Can initiate a chain 'de novo'." [EC…	21	4	107	81	89	203	94	160	219	119	205	2.39232	139.865	0.609158	0.192555	3.16355	0.00155857	0.0185248	122.366	0.674533	0.212794	3.16989	0.00152494	0.0153399	133.785	0.587371	0.180562	3.25302	0.00114185	0.0219646
ENSDARG00000052344	3	62173396	62194512	tbl3	.	hematopoietic stem cell decreased amount;hematopoietic stem cell proliferation decreased rate;M phase increased duration;intestine hypoplastic;S phase increased duration;exocrine pancreas hypoplastic;embryonic retina morphogenesis in camera-type eye delayed;cardiac muscle cell proliferation increased occurrence;T cell absent;blood island has fewer parts of type	Any process involved in the conversion of a primary ribosomal RNA (rRNA) transcript into one or more mature rRNA molecules. [GOC:curators];"Any process that modulates a cellular process that is involved in the progression of biochemical and morphological phases and events that occur in a cell during successive cell replication or nuclear replication events." [GOC:dph, GOC:tb];"Any process involve…	173	54	320	308	334	506	450	518	515	430	538	1.67974	433.365	0.531431	0.117148	4.53642	5.72164e-06	0.000205738	406.83	0.673775	0.121553	5.54308	2.97196e-08	1.1582e-06	401.451	0.38789	0.124024	3.12754	0.00176273	0.0303167
ENSDARG00000043304	16	17234540	17251898	nop2	NOP2 nucleolar protein homolog (yeast)	.	Catalysis of the transfer of a methyl group to an acceptor molecule. [ISBN:0198506732];"Interacting selectively and non-covalently with an RNA molecule or a portion thereof." [GOC:jl, GOC:mah];"A small, dense body one or more of which are present in the nucleus of eukaryotic cells. It is rich in RNA and protein, is not bounded by a limiting membrane, and is not seen during mitosis. Its prime func…	307	45	593	602	484	964	670	991	946	843	969	2.77024	778.646	0.565004	0.129789	4.35326	1.34128e-05	0.000409745	717.91	0.673544	0.143499	4.69371	2.68295e-06	6.80487e-05	728.573	0.463998	0.124349	3.73142	0.000190403	0.0052138
ENSDARG00000029252	6	3716666	3728694	ssb	Sjogren syndrome antigen B (autoantigen La)	.	Interacting selectively and non-covalently with any nucleic acid. [GOC:jl];"A membrane-bounded organelle of eukaryotic cells in which chromosomes are housed and replicated. In most cells, the nucleus contains all of the cell's chromosomes except the organellar chromosomes, and is the site of RNA synthesis and processing. In some species, or in specialized cell types, RNA metabolism or DNA replica…	187	31	772	859	803	1377	999	1360	1371	1170	1379	2.5927	1112	0.563097	0.109589	5.13824	2.77318e-07	1.64618e-05	1028.01	0.672898	0.117505	5.72653	1.02505e-08	4.41352e-07	1041.6	0.457823	0.105824	4.32628	1.51646e-05	0.000641754
ENSDARG00000012495	7	30772991	30779575	mphosph10	M-phase phosphoprotein 10 (U3 small nucleolar ribonucleoprotein)	anterior-most region part_of head decreased size;anterior region part_of whole organism necrotic;pericardium edematous;heart edematous	A cellular process that results in the biosynthesis of constituent macromolecules, assembly, and arrangement of constituent parts of ribosome subunits; includes transport to the sites of protein synthesis. [GOC:ma, PMID:26404467, Wikipedia:Ribosome_biogenesis];"Any process involved in the conversion of a primary ribosomal RNA (rRNA) transcript into one or more mature rRNA molecules." [GOC:curator…	280	28	259	228	259	417	304	438	474	378	480	3.32193	355.288	0.629262	0.119254	5.27664	1.31573e-07	9.07941e-06	317.301	0.672492	0.143272	4.69382	2.68152e-06	6.80487e-05	339.644	0.569351	0.132384	4.30077	1.70206e-05	0.000701349
ENSDARG00000026767	6	22957709	23002373	nol11	.	.	.	91	31	528	502	562	838	702	892	841	732	780	1.5536	705.277	0.503985	0.114917	4.38565	1.15639e-05	0.000360492	670.893	0.672141	0.111571	6.02436	1.69783e-09	8.49152e-08	648.139	0.341736	0.106538	3.20766	0.00133819	0.024633
ENSDARG00000003693	14	7377552	7395997	hars	histidyl-tRNA synthetase	.	Interacting selectively and non-covalently with ATP, adenosine 5'-triphosphate, a universally important coenzyme and enzyme regulator. [ISBN:0198506732];"Catalysis of the reaction: ATP + L-histidine + tRNA(His) = AMP + diphosphate + L-histidyl-tRNA(His)." [EC:6.1.1.21];"All of the contents of a cell excluding the plasma membrane and nucleus, but including other subcellular structures." [ISBN:0198…	189	65	989	1175	1199	1852	1419	1836	1801	1500	1929	1.53987	1511.05	0.536553	0.113301	4.73565	2.18359e-06	9.14749e-05	1410.12	0.669183	0.106348	6.29236	3.12673e-10	1.78065e-08	1408.64	0.413655	0.108959	3.79643	0.000146793	0.0042414
ENSDARG00000024416	19	2395114	2404599	twistnb	.	radial glial cell part_of hindbrain morphology;gut quality;anterior region part_of trunk decreased thickness;astrocyte part_of postoptic commissure mislocalised;nerve part_of trunk truncated;commissural neuron axon guidance occurs_in postoptic commissure disrupted;trunk has fewer parts of type ZFA:0009147;yolk circular;central nervous system necrotic;extension decreased thickness;pericardium edem…	Catalysis of the reaction: nucleoside triphosphate + RNA(n) = diphosphate + RNA(n+1). Utilizes a DNA template, i.e. the catalysis of DNA-template-directed extension of the 3'-end of an RNA strand by one nucleotide at a time. Can initiate a chain 'de novo'. [EC:2.7.7.6, GOC:pf];"The cellular synthesis of RNA on a template of DNA." [GOC:jl, GOC:txnOH]	178	33	244	206	223	367	260	426	423	358	379	2.43134	316.96	0.598562	0.128076	4.67348	2.96135e-06	0.000118369	287.194	0.665944	0.157072	4.23974	2.23779e-05	0.000447693	300.016	0.521184	0.132091	3.94564	7.95867e-05	0.00250704
ENSDARG00000004774	5	55866769	55914268	wdr36	WD repeat domain 36	lens opacity;photoreceptor cell part_of retina degenerate;retina development in camera-type eye disrupted;regulation of mitotic cell cycle disrupted;nucleolus part_of retinal ganglion cell increased size;anatomical system quality;ciliary marginal zone decreased size;gut hypoplastic;nucleolus part_of ciliary marginal zone increased size;anterior-most region part_of head decreased size;liver necrot…	All of the contents of a cell excluding the plasma membrane and nucleus, but including other subcellular structures. [ISBN:0198547684];"Any process involved in the conversion of a primary ribosomal RNA (rRNA) transcript into one or more mature rRNA molecules." [GOC:curators];"A large ribonucleoprotein complex that is an early preribosomal complex. In S. cerevisiae, it has a size of 80S and consis…	109	37	599	571	548	983	714	912	946	800	902	1.55873	770.747	0.51741	0.120368	4.29856	1.71914e-05	0.000500098	722.359	0.651264	0.127545	5.10615	3.28784e-07	1.02057e-05	717.481	0.390016	0.113754	3.42858	0.000606743	0.013295
ENSDARG00000020232	6	52339548	52348651	eif6	.	.	The part of the cytoplasm that does not contain organelles but which does contain other particulate matter, such as protein complexes. [GOC:hjd, GOC:jl];"The directed movement of a ribosomal subunit from the nucleus into the cytoplasm." [GOC:ai];"A preribosomal complex consisting of 27SA, 27SB, and/or 7S pre-rRNA, 5S rRNA, ribosomal proteins including late-associating large subunit proteins, and …	78	34	741	715	709	1216	894	1165	1245	885	1135	1.19794	962.015	0.494502	0.130502	3.78924	0.000151109	0.0029779	907.477	0.650336	0.12014	5.41317	6.19201e-08	2.26045e-06	892.363	0.356303	0.121984	2.92091	0.00349013	0.0516974
ENSDARG00000017799	23	1730663	1748141	tgm1	.	.	Catalysis of the reaction: protein glutamine + alkylamine = protein N5-alkylglutamine + NH3. This reaction is the formation of the N6-(L-isoglutamyl)-L-lysine isopeptide, resulting in cross-linking polypeptide chains; the gamma-carboxamide groups of peptidyl-glutamine residues act as acyl donors, and the 6-amino-groups of peptidyl-lysine residues act as acceptors, to give intra- and intermolecula…	58	16	75	91	93	168	135	101	181	170	248	1.85798	137.756	0.733322	0.177773	4.12505	3.70661e-05	0.000951781	111.244	0.644236	0.203088	3.1722	0.00151288	0.0152329	139.134	0.826546	0.166916	4.95186	7.35087e-07	4.88845e-05
ENSDARG00000007077	9	32859967	32875568	si:dkey-145p14.5	si:dkey-145p14.5	.	The living contents of a cell; the matter contained within (but not including) the plasma membrane, usually taken to exclude large vacuoles and masses of secretory or ingested material. In eukaryotes it includes the nucleus and cytoplasm. [ISBN:0198506732];"The actions of a single gene product or complex at the molecular level consisting of a single biochemical activity or multiple causally linke…	106	44	453	516	612	794	689	871	770	797	773	1.26849	692.54	0.496978	0.107941	4.60417	4.14108e-06	0.000157961	654.419	0.642137	0.113358	5.66467	1.47309e-08	6.1086e-07	642.856	0.350293	0.106922	3.27614	0.00105236	0.0204879
ENSDARG00000005772	8	8341082	8349653	tsr2	TSR2, 20S rRNA accumulation, homolog (S. cerevisiae)	liver quality;ceratohyal cartilage bent;eye decreased size;head pointed;gut hypoplastic;pharyngeal arch shape;gut quality;head decreased width;pericardium edematous;liver hypoplastic;heart quality	.	106	15	216	196	184	374	246	295	358	300	271	2.82103	269.715	0.507481	0.146962	3.45315	0.000554091	0.00836155	252.693	0.642007	0.164549	3.90162	9.55513e-05	0.00156009	250.415	0.380374	0.141769	2.68305	0.00729535	0.0884393
ENSDARG00000042520	5	67474119	67499279	si:dkey-251i10.3	si:dkey-251i10.3	.	Any process involved in the maturation of a precursor Small SubUnit (SSU) ribosomal RNA (rRNA) molecule into a mature SSU-rRNA molecule. [GOC:curators];"A large ribonucleoprotein complex that is an early preribosomal complex. In S. cerevisiae, it has a size of 80S and consists of the 35S pre-rRNA, early-associating ribosomal proteins most of which are part of the small ribosomal subunit, the U3 s…	205	29	306	333	303	486	433	490	500	447	512	2.8215	421.063	0.521065	0.108815	4.78852	1.68012e-06	7.26678e-05	392.774	0.637468	0.125899	5.06332	4.12012e-07	1.26059e-05	394.324	0.394442	0.121535	3.24551	0.00117242	0.0223882
ENSDARG00000054540	5	26847190	26852040	imp4	IMP4, U3 small nucleolar ribonucleoprotein, homolog (yeast)	.	Interacting selectively and non-covalently with small nucleolar RNA. [GOC:mah];"A large ribonucleoprotein complex that is an early preribosomal complex. In S. cerevisiae, it has a size of 80S and consists of the 35S pre-rRNA, early-associating ribosomal proteins most of which are part of the small ribosomal subunit, the U3 snoRNA and associated proteins." [GOC:krc, GOC:vw, PMID:12068309, PMID:129…	39	3	194	191	214	341	233	333	367	275	323	3.70044	271.874	0.539367	0.128382	4.20126	2.65439e-05	0.000724706	250.581	0.636383	0.15002	4.24198	2.21555e-05	0.000443858	256.054	0.434733	0.135933	3.19813	0.00138322	0.0252841
ENSDARG00000007744	15	25635326	25656331	tsr1	TSR1, 20S rRNA accumulation, homolog (S. cerevisiae)	.	A cellular process that results in the biosynthesis of constituent macromolecules, assembly, and arrangement of constituent parts of ribosome subunits; includes transport to the sites of protein synthesis. [GOC:ma, PMID:26404467, Wikipedia:Ribosome_biogenesis];"Interacting selectively and non-covalently with GTP, guanosine triphosphate." [GOC:ai];"Endonucleolytic cleavage of a pre-rRNA molecule o…	350	96	641	675	685	1025	890	1051	1245	1003	1243	1.86625	929.01	0.607724	0.0868298	6.99903	2.57746e-12	8.20286e-10	828.628	0.635955	0.103437	6.14825	7.83438e-10	4.19326e-08	897.691	0.562796	0.110019	5.11542	3.13038e-07	2.3986e-05
ENSDARG00000098080	16	33902006	33925877	gnl2	guanine nucleotide binding protein-like 2 (nucleolar)	midbrain physical object quality;retina development in camera-type eye delayed;diencephalon physical object quality;central region part_of retinal neural layer proliferative;retinal neural layer poorly differentiated;forebrain ventricle increased volume;amacrine cell decreased amount;cell part_of head apoptotic;regulation of mitotic cell cycle embryonic process quality;neuron differentiation prem…	The progression of the neural retina over time from its initial formation to the mature structure. The neural retina is the part of the retina that contains neurons and photoreceptor cells. [GOC:ascb_2009, GOC:dph, GOC:tb];"A membrane-bounded organelle of eukaryotic cells in which chromosomes are housed and replicated. In most cells, the nucleus contains all of the cell's chromosomes except the o…	219	58	947	880	849	1480	1045	1499	1479	1192	1450	1.91681	1194.31	0.503904	0.125104	4.02789	5.628e-05	0.00134085	1116.71	0.632973	0.127839	4.95133	7.37091e-07	2.13559e-05	1117.39	0.386984	0.115603	3.34754	0.000815323	0.0166628
ENSDARG00000057105	10	23070741	23099869	nle1	notchless homolog 1 (Drosophila)	.	An intracellular organelle, about 200 A in diameter, consisting of RNA and protein. It is the site of protein biosynthesis resulting from translation of messenger RNA (mRNA). It consists of two subunits, one large and one small, each containing only protein and RNA. Both the ribosome and its subunits are characterized by their sedimentation coefficients, expressed in Svedberg units (symbol: S). H…	58	28	243	255	228	381	293	422	473	378	437	1.05063	341.108	0.609433	0.112431	5.42052	5.94266e-08	4.52555e-06	303.498	0.63207	0.143409	4.40747	1.04587e-05	0.000232122	329.266	0.561184	0.130413	4.30312	1.68413e-05	0.000698598
ENSDARG00000003287	6	9630523	9646275	wdr12	.	pericardium edematous;liver hypoplastic;head decreased width;gut quality;eye decreased size;gut hypoplastic;anterior-most region part_of head decreased size;liver quality;anatomical system quality	Any process involved in the maturation of a precursor Large SubUnit (LSU) ribosomal RNA (rRNA) molecule into a mature LSU-rRNA molecule. [GOC:curators];"Any process involved in the maturation of a precursor Large SubUnit (LSU) ribosomal RNA (rRNA) molecule into a mature LSU-rRNA molecule from the pre-rRNA molecule originally produced as a tricistronic rRNA transcript that contains the Small Subun…	78	12	290	274	292	462	389	425	464	383	440	2.70044	378.278	0.494077	0.11885	4.15715	3.22242e-05	0.000843088	356.314	0.631379	0.130961	4.82112	1.42752e-06	3.87864e-05	352.116	0.353266	0.124327	2.84143	0.00449123	0.0631848
ENSDARG00000016548	1	45925150	45959721	eif5b	.	.	Interacting selectively and non-covalently with GTP, guanosine triphosphate. [GOC:ai];"Catalysis of the reaction: GTP + H2O = GDP + phosphate." [ISBN:0198547684]	577	121	916	1032	1025	1520	1255	1618	1540	1352	1514	2.25356	1299.99	0.489354	0.103541	4.72617	2.28795e-06	9.50991e-05	1226.69	0.631022	0.100997	6.24794	4.159e-10	2.32512e-08	1211.96	0.351483	0.0973067	3.61212	0.000303706	0.00747595
ENSDARG00000044488	24	36158745	36175365	pak1ip1	PAK1 interacting protein 1	.	The actions of a single gene product or complex at the molecular level consisting of a single biochemical activity or multiple causally linked biochemical activities. A given gene product may exhibit one or more molecular functions. [GOC:go_curators];"A cellular process that results in the biosynthesis of constituent macromolecules, assembly, and arrangement of constituent parts of ribosome subun…	55	15	336	332	364	596	412	532	637	508	574	1.87447	471.788	0.564639	0.111556	5.06149	4.15991e-07	2.30394e-05	428.563	0.628184	0.134525	4.66966	3.01701e-06	7.5535e-05	450.036	0.493929	0.117977	4.18666	2.83095e-05	0.00105898
ENSDARG00000058865	8	12118097	12122228	endog	endonuclease G	.	Interacting selectively and non-covalently with any metal ion. [GOC:ai];"The cleavage of DNA during apoptosis, which usually occurs in two stages: cleavage into fragments of about 50 kbp followed by cleavage between nucleosomes to yield 200 bp fragments." [GOC:dph, GOC:mah, GOC:mtg_apoptosis, GOC:tb, ISBN:0721639976, PMID:15723341, PMID:23379520];"Catalysis of the hydrolysis of various bonds, e.g…	22	10	100	142	111	191	153	191	204	210	219	1.1375	166.926	0.614062	0.126084	4.87027	1.11447e-06	5.12153e-05	148.025	0.623515	0.173057	3.60295	0.000314629	0.00427703	161.04	0.548083	0.153781	3.56404	0.000365191	0.00873291
ENSDARG00000077607	25	36249279	36263125	dus2	dihydrouridine synthase 2	.	A metabolic process that results in the removal or addition of one or more electrons to or from a substance, with or without the concomitant removal or addition of a proton or protons. [GOC:dhl, GOC:ecd, GOC:jh2, GOC:jid, GOC:mlg, GOC:rph];"The process whereby a uridine in a transfer RNA is converted to dihydrouridine." [GOC:hjd, ISBN:1-55581-073-x];"Interacting selectively and non-covalently wit…	102	26	184	217	237	337	277	332	389	279	347	1.97199	286.098	0.528319	0.120768	4.37466	1.2162e-05	0.000376933	263.758	0.623382	0.138128	4.51306	6.38981e-06	0.000149464	270.352	0.420033	0.138144	3.04054	0.00236156	0.038185
ENSDARG00000045562	21	14826583	14832369	pus1	pseudouridylate synthase 1	.	The intramolecular conversion of uridine to pseudouridine in an mRNA molecule. [PMID:25192136];"The intramolecular conversion of uridine to pseudouridine in a tRNA molecule." [GOC:mah];"A membrane-bounded organelle of eukaryotic cells in which chromosomes are housed and replicated. In most cells, the nucleus contains all of the cell's chromosomes except the organellar chromosomes, and is the site…	35	8	161	155	143	244	205	235	286	194	259	2.12928	207.657	0.518088	0.13736	3.77176	0.000162099	0.00313083	191.104	0.611179	0.156569	3.90357	9.47827e-05	0.00154991	196.573	0.410077	0.154109	2.66095	0.00779212	0.0925861
ENSDARG00000100231	25	13731542	13744806	ccdc135	coiled-coil domain containing 135	.	.	9	4	137	120	132	210	135	246	262	187	211	1.16993	179.772	0.54542	0.150999	3.61209	0.00030374	0.00519378	162.697	0.607513	0.18072	3.36164	0.000774823	0.00895892	171.593	0.475791	0.153475	3.10011	0.00193446	0.0326011
ENSDARG00000099280	4	5868034	5910043	utp20	UTP20 small subunit (SSU) processome component	.	The actions of a single gene product or complex at the molecular level consisting of a single biochemical activity or multiple causally linked biochemical activities. A given gene product may exhibit one or more molecular functions. [GOC:go_curators]	479	92	1079	1188	1090	1648	1461	1737	1774	1575	1749	2.38032	1468.33	0.491013	0.0933685	5.25887	1.44942e-07	9.68839e-06	1368.49	0.597649	0.101623	5.88103	4.07711e-09	1.89697e-07	1388.98	0.380478	0.100264	3.79477	0.000147779	0.0042523
ENSDARG00000018902	5	12836913	12865386	pes	pescadillo	mandibular arch skeleton decreased size;pectoral fin morphology;astrocyte part_of forebrain morphology;white matter part_of spinal cord has fewer parts of type;plasma membrane part_of oligodendrocyte disorganized;cardiac muscle cell proliferation increased occurrence;oligodendrocyte differentiation disrupted;activation of cysteine-type endopeptidase activity involved in apoptotic process increase…	A cellular process that results in the biosynthesis of constituent macromolecules, assembly, and arrangement of constituent parts of ribosome subunits; includes transport to the sites of protein synthesis. [GOC:ma, PMID:26404467, Wikipedia:Ribosome_biogenesis];"Any process involved in the conversion of a primary ribosomal RNA (rRNA) transcript into one or more mature rRNA molecules." [GOC:curator…	33	12	161	208	163	293	209	285	357	266	307	1.45943	246.626	0.573421	0.130188	4.40458	1.05991e-05	0.000336816	219.698	0.596847	0.160839	3.71084	0.000206576	0.00297852	238.873	0.524715	0.145629	3.60311	0.000314435	0.00769485
ENSDARG00000045857	20	3290231	3310017	cebpz	CCAAT/enhancer binding protein (C/EBP), zeta	.	A membrane-bounded organelle of eukaryotic cells in which chromosomes are housed and replicated. In most cells, the nucleus contains all of the cell's chromosomes except the organellar chromosomes, and is the site of RNA synthesis and processing. In some species, or in specialized cell types, RNA metabolism or DNA replication may be absent. [GOC:go_curators];"Any process specifically pertinent to…	170	35	688	692	652	1078	824	1037	1140	1008	1140	2.28011	909.394	0.529448	0.0972749	5.4428	5.24489e-08	4.08164e-06	829.192	0.589906	0.118768	4.96688	6.80387e-07	2.00142e-05	872.724	0.460102	0.108177	4.25323	2.10713e-05	0.000828148
ENSDARG00000015921	4	1825839	1839352	pwp1	PWP1 homolog (S. cerevisiae)	.	Any process specifically pertinent to the functioning of integrated living units: cells, tissues, organs, and organisms. A process is a collection of molecular events with a defined beginning and end. [GOC:go_curators, GOC:isa_complete];"A membrane-bounded organelle of eukaryotic cells in which chromosomes are housed and replicated. In most cells, the nucleus contains all of the cell's chromosome…	65	30	364	365	323	582	415	535	708	453	626	1.11548	480.295	0.535567	0.136084	3.93557	8.29987e-05	0.00184544	431.191	0.586446	0.140203	4.18284	2.87886e-05	0.000559936	464.919	0.489988	0.141801	3.45545	0.000549369	0.0122689
ENSDARG00000051851	7	55292959	55325712	ctu2	cytosolic thiouridylase subunit 2 homolog (S. pombe)	.	Catalysis of the transfer of sulfur atoms from one compound (donor) to another (acceptor). [GOC:ai, ISBN:0721662544];"Interacting selectively and non-covalently with transfer RNA." [GOC:ai];"All of the contents of a cell excluding the plasma membrane and nucleus, but including other subcellular structures." [ISBN:0198547684];"The part of the cytoplasm that does not contain organelles but which do…	15	5	126	124	137	216	153	199	259	156	224	1.58496	175.167	0.515503	0.148854	3.46314	0.000533909	0.00813181	159.065	0.586318	0.165411	3.54461	0.0003932	0.00514671	167.836	0.43448	0.161623	2.68824	0.00718304	0.0876356
ENSDARG00000109517	11	11445689	11445985	RF00017	.	.	.	255	63	108	130	118	199	132	195	245	309	154	2.01707	173.128	0.60571	0.171144	3.53918	0.000401378	0.00641988	146.655	0.585075	0.174616	3.35064	0.00080626	0.00924234	172.826	0.628001	0.172773	3.63483	0.000278159	0.00695332
ENSDARG00000069422	21	30401784	30409204	nhp2	NHP2 ribonucleoprotein homolog (yeast)	.	Any process involved in the maturation of a precursor Large SubUnit (LSU) ribosomal RNA (rRNA) molecule into a mature LSU-rRNA molecule. [GOC:curators];"Interacting selectively and non-covalently with box H/ACA small nucleolar RNA." [GOC:mah];"A membrane-bounded organelle of eukaryotic cells in which chromosomes are housed and replicated. In most cells, the nucleus contains all of the cell's chro…	64	16	326	301	298	490	387	462	550	436	488	2	411.999	0.510846	0.111598	4.57757	4.70408e-06	0.000175974	378.073	0.584324	0.134696	4.3381	1.43719e-05	0.000307233	393.653	0.424268	0.126706	3.34844	0.000812688	0.0166252
ENSDARG00000038785	2	32505554	32513538	abcf2a	ATP-binding cassette, sub-family F (GCN20), member 2a	.	Interacting selectively and non-covalently with ATP, adenosine 5'-triphosphate, a universally important coenzyme and enzyme regulator. [ISBN:0198506732];"Interacting selectively and non-covalently with a nucleotide, any compound consisting of a nucleoside that is esterified with (ortho)phosphate or an oligophosphate at any hydroxyl group on the ribose or deoxyribose." [GOC:mah, ISBN:0198547684];"…	323	105	1089	1042	1015	1426	1298	1818	1587	1601	1669	1.62114	1382.66	0.49261	0.101603	4.84837	1.24482e-06	5.6117e-05	1280.3	0.583613	0.116613	5.00468	5.59546e-07	1.67362e-05	1315.5	0.399973	0.102679	3.89535	9.80562e-05	0.00300744
ENSDARG00000087779	10	15321522	15340450	pum3	pumilio RNA-binding family member 3	brain edematous;cone retinal bipolar cell disorganized;anterior-most region part_of head decreased size;rod bipolar cell disorganized;eye decreased size;germ cell migration cellular spatiotemporal quality;retina immature;P granule part_of primordial germ cell decreased amount	Interacting selectively and non-covalently with an RNA molecule or a portion thereof. [GOC:jl, GOC:mah];"Interacting selectively and non-covalently with messenger RNA (mRNA), an intermediate molecule between DNA and protein. mRNA includes UTR and coding sequences, but does not contain introns." [GOC:kmv, GOC:pr, SO:0000234];"A small, dense body one or more of which are present in the nucleus of e…	236	22	606	584	625	970	684	963	1168	805	1033	3.42321	816.551	0.528898	0.118984	4.44512	8.78416e-06	0.000288475	737.537	0.582407	0.123898	4.70069	2.59284e-06	6.6156e-05	789.084	0.480085	0.123156	3.89819	9.69142e-05	0.00297677
ENSDARG00000023028	24	9881219	9893794	cdv3	carnitine deficiency-associated gene expressed in ventricle 3	.	All of the contents of a cell excluding the plasma membrane and nucleus, but including other subcellular structures. [ISBN:0198547684]	292	136	927	899	877	1352	1100	1421	1648	1337	1515	1.10236	1217.12	0.544131	0.0911197	5.9716	2.34937e-09	2.96424e-07	1096.33	0.57903	0.111194	5.2074	1.91508e-07	6.30175e-06	1180.01	0.497246	0.107994	4.6044	4.1366e-06	0.000217177
ENSDARG00000025854	8	49065348	49089382	ddx51	DEAD (Asp-Glu-Ala-Asp) box polypeptide 51	gut quality;pericardium edematous;eye decreased size;gut hypoplastic;heart quality;anterior-most region part_of head decreased size	Interacting selectively and non-covalently with any nucleic acid. [GOC:jl];"Interacting selectively and non-covalently with a nucleotide, any compound consisting of a nucleoside that is esterified with (ortho)phosphate or an oligophosphate at any hydroxyl group on the ribose or deoxyribose." [GOC:mah, ISBN:0198547684];"Catalysis of the hydrolysis of various bonds, e.g. C-O, C-N, C-C, phosphoric a…	105	18	173	204	196	310	245	270	290	267	329	2.54432	252.051	0.487973	0.121688	4.01003	6.07107e-05	0.00142885	233.239	0.577213	0.147567	3.91152	9.17163e-05	0.00150669	239.443	0.383964	0.137264	2.79726	0.00515382	0.0696284
ENSDARG00000017605	2	23613040	23620223	rpp40	ribonuclease P/MRP 40 subunit	.	The part of a cell, extracellular environment or virus in which a gene product is located. A gene product may be located in one or more parts of a cell and its location may be as specific as a particular macromolecular complex, that is, a stable, persistent association of macromolecules that function together. [GOC:go_curators, NIF_Subcellular:sao-1337158144];"The actions of a single gene product…	14	4	118	109	91	191	111	174	202	148	195	1.80735	147.144	0.527341	0.161872	3.25777	0.00112292	0.0144091	132.375	0.574582	0.195108	2.94494	0.00323019	0.0280879	141.538	0.466836	0.165601	2.81905	0.00481662	0.0664244
ENSDARG00000095817	23	45473286	45487304	znhit6	.	.	Interacting selectively and non-covalently with any metal ion. [GOC:ai]	36	5	175	174	158	262	220	248	284	238	285	2.848	225.472	0.502602	0.119379	4.21014	2.55212e-05	0.000702179	206.738	0.568257	0.153103	3.71161	0.000205947	0.00297579	215.777	0.410059	0.142506	2.87748	0.00400859	0.0576731
ENSDARG00000041895	20	38788319	38827623	cad	carbamoyl-phosphate synthetase 2, aspartate transcarbamylase, and dihydroorotase	Notch signaling pathway decreased intensity;central region part_of optic tectum proliferative;ceratobranchial cartilage absent;heart quality;fasciculation of sensory neuron axon occurs_in vagal ganglion decreased process quality;mitotic cell cycle occurs_in hindbrain decreased process quality;axon part_of facial ganglion malformed;Meckel's cartilage shortened;ventral mandibular arch atrophied;ana…	Any process that modulates the frequency, rate or extent of vascular endothelial growth factor signaling pathway. [GOC:TermGenie];"Any process that modulates the frequency, rate or extent of vascular endothelial growth factor receptor signaling pathway activity." [GOC:dgh];"The process in which the anatomical structure of the vagus nerve is generated and organized. This nerve is primarily sensory…	2122	205	2531	2688	2485	3790	3263	3827	4086	3848	4030	3.37173	3367.88	0.494645	0.0804546	6.14813	7.84003e-10	1.1148e-07	3100.84	0.567451	0.0983714	5.76846	8.00006e-09	3.52855e-07	3229.55	0.413738	0.0927356	4.46149	8.13932e-06	0.000384015
ENSDARG00000056720	11	26370381	26375575	utp3	UTP3, small subunit (SSU) processome component, homolog (S. cerevisiae)	.	Any process involved in the maturation of a precursor Small SubUnit (SSU) ribosomal RNA (rRNA) molecule into a mature SSU-rRNA molecule from the pre-rRNA molecule originally produced as a tricistronic rRNA transcript that contains the Small Subunit (SSU) rRNA, 5.8S rRNA, and the Large Subunit (LSU) in that order from 5' to 3' along the primary transcript. [GOC:curators];"A large ribonucleoprotein…	137	10	292	248	263	450	305	402	530	414	496	3.7761	372.642	0.57547	0.124669	4.616	3.91205e-06	0.0001503	326.918	0.565575	0.150997	3.74559	0.000179967	0.00266346	366.765	0.571311	0.132583	4.3091	1.63924e-05	0.000684038
ENSDARG00000069977	11	6899	12347	myg1	melanocyte proliferating gene 1	.	Any process specifically pertinent to the functioning of integrated living units: cells, tissues, organs, and organisms. A process is a collection of molecular events with a defined beginning and end. [GOC:go_curators, GOC:isa_complete];"The part of a cell, extracellular environment or virus in which a gene product is located. A gene product may be located in one or more parts of a cell and its l…	138	64	396	346	347	570	452	533	679	502	564	1.10852	483.502	0.499117	0.11813	4.22513	2.38801e-05	0.000663878	441.711	0.564384	0.135083	4.17805	2.94017e-05	0.000568934	464.983	0.425934	0.130739	3.25788	0.00112246	0.0216314
ENSDARG00000003941	24	23837519	23839647	rrs1	RRS1 ribosome biogenesis regulator homolog (S. cerevisiae)	.	A membrane-bounded organelle of eukaryotic cells in which chromosomes are housed and replicated. In most cells, the nucleus contains all of the cell's chromosomes except the organellar chromosomes, and is the site of RNA synthesis and processing. In some species, or in specialized cell types, RNA metabolism or DNA replication may be absent. [GOC:go_curators];"Endonucleolytic cleavage between the …	78	15	268	251	258	409	292	413	431	388	470	2.37851	349.396	0.529381	0.114232	4.63425	3.58231e-06	0.000139645	314.84	0.563592	0.143105	3.93832	8.20525e-05	0.00136772	338.747	0.478308	0.128555	3.72066	0.000198705	0.00537094
ENSDARG00000002710	22	36673312	36690751	ncl	nucleolin	rRNA processing decreased process quality;blood accumulation;midbrain hindbrain boundary condensed;heart quality;pericardium edematous;midbrain hindbrain boundary quality;gut hypoplastic;anterior-most region part_of head decreased size;heart decreased rate;heart looping disrupted;eye decreased size;gut quality;rRNA transcription decreased process quality;cardiac muscle cell part_of cardiac ventri…	Any process involved in the conversion of a primary ribosomal RNA (rRNA) transcript into one or more mature rRNA molecules. [GOC:curators];"Interacting selectively and non-covalently with an RNA molecule or a portion thereof." [GOC:jl, GOC:mah];"The synthesis of ribosomal RNA (rRNA), any RNA that forms part of the ribosomal structure, from a DNA template." [GOC:jl, ISBN:0198506732];"Interacting s…	3508	867	4255	4733	4675	6408	5724	7000	7019	6803	7523	2.01654	5960.69	0.498935	0.0716015	6.96822	3.20968e-12	9.91885e-10	5462.18	0.561407	0.0859953	6.52835	6.64992e-11	4.26474e-09	5743.4	0.42831	0.0883764	4.84644	1.25699e-06	7.72184e-05
ENSDARG00000040707	6	40060409	40063464	chchd4b	.	.	The actions of a single gene product or complex at the molecular level consisting of a single biochemical activity or multiple causally linked biochemical activities. A given gene product may exhibit one or more molecular functions. [GOC:go_curators];"The part of a cell, extracellular environment or virus in which a gene product is located. A gene product may be located in one or more parts of a …	3	1	62	50	68	103	74	89	124	85	124	1.58496	85.3211	0.573622	0.165218	3.4719	0.000516784	0.00791054	74.3689	0.55696	0.20994	2.65295	0.00797909	0.0567059	83.6728	0.523405	0.18298	2.86045	0.00423047	0.0600405
ENSDARG00000007130	11	41846059	41853874	mrto4	MRT4 homolog, ribosome maturation factor	.	Any process involved in the conversion of a primary ribosomal RNA (rRNA) transcript into one or more mature rRNA molecules. [GOC:curators];"A cellular process that results in the biosynthesis of constituent macromolecules, assembly, and arrangement of constituent parts of ribosome subunits; includes transport to the sites of protein synthesis." [GOC:ma, PMID:26404467, Wikipedia:Ribosome_biogenesi…	79	12	375	373	327	592	412	530	686	466	562	2.71882	475.915	0.482986	0.133355	3.6218	0.00029256	0.00502306	435.338	0.556692	0.143337	3.88379	0.000102842	0.00166512	457.616	0.413923	0.13672	3.02752	0.00246569	0.0393716
ENSDARG00000040666	9	38158570	38162095	nifk	nucleolar protein interacting with the FHA domain of MKI67	whole organism viability;central nervous system necrotic;brain necrotic;fourth ventricle distended;anterior region part_of trunk decreased thickness;eye decreased size;gut hypoplastic;anterior-most region part_of head decreased size;midbrain hindbrain boundary condensed;trunk necrotic;liver hypoplastic	A small, dense body one or more of which are present in the nucleus of eukaryotic cells. It is rich in RNA and protein, is not bounded by a limiting membrane, and is not seen during mitosis. Its prime function is the transcription of the nucleolar DNA into 45S ribosomal-precursor RNA, the processing of this RNA into 5.8S, 18S, and 28S components of ribosomal RNA, and the association of these comp…	91	11	429	397	371	651	440	618	611	564	647	3.04836	521.572	0.459974	0.124993	3.68	0.000233231	0.00416515	484.369	0.554356	0.143493	3.86331	0.000111863	0.00178947	496.876	0.367118	0.123299	2.97746	0.00290649	0.0448675
ENSDARG00000005122	21	17051478	17108649	atp2a2a	ATPase sarcoplasmic/endoplasmic reticulum Ca2+ transporting 2b	atrium collapsed;cardiac ventricle decreased contractility;pericardium edematous;cardiac ventricle collapsed;heart contraction decreased rate;sensory perception of touch disrupted;atrium decreased contractility;heart looping arrested	The transport of an inorganic cation across a membrane and against an electrochemical gradient, using energy from ATP hydrolysis. [GOC:BHF];"A process in which a calcium ion is transported from one side of a membrane to the other by means of some agent such as a transporter or pore." [GOC:mah];"The component of a membrane consisting of the gene products and protein complexes having at least some …	432	208	1709	2145	1954	2673	2523	2899	2863	2818	3149	1.05445	2506.29	0.473312	0.0880085	5.37803	7.53069e-08	5.51811e-06	2316.76	0.554	0.0989567	5.59841	2.16331e-08	8.57137e-07	2403.07	0.386406	0.100587	3.84152	0.000122274	0.00363318
ENSDARG00000098375	14	16151368	16212896	polr1a	polymerase (RNA) I polypeptide A	eye shape;neuron development delayed;developmental pigmentation delayed;whole organism shape;blood quality;neural crest cell development disrupted;yolk grey;post-vent region decreased length;Rohon-Beard neuron part_of neural tube apoptotic;ceratobranchial cartilage absent;hindbrain hydrocephalic;embryonic viscerocranium morphogenesis disrupted;midbrain hindbrain boundary decreased thickness;inner…	Interacting selectively and non-covalently with zinc (Zn) ions. [GOC:ai];"The process in which the anatomical structures of the viscerocranium are generated and organized during the embryonic phase. The viscerocranium is the part of the skull comprising the facial bones." [GOC:dsf, GOC:jid, PMID:16049113];"Catalysis of the transfer of a group, e.g. a methyl group, glycosyl group, acyl group, phos…	326	66	1261	1242	1255	1914	1428	1947	2121	1757	1975	2.30433	1639.66	0.484344	0.0969219	4.99726	5.81495e-07	2.99336e-05	1506.14	0.553586	0.111731	4.95465	7.24616e-07	2.11117e-05	1577.35	0.413293	0.100884	4.09671	4.19065e-05	0.00147045
ENSDARG00000020377	7	66634167	66654025	eif4g2a	eukaryotic translation initiation factor 4, gamma 2a	.	The part of a cell, extracellular environment or virus in which a gene product is located. A gene product may be located in one or more parts of a cell and its location may be as specific as a particular macromolecular complex, that is, a stable, persistent association of macromolecules that function together. [GOC:go_curators, NIF_Subcellular:sao-1337158144];"Interacting selectively and non-cova…	608	259	1703	2029	2155	2594	2489	3107	2587	2723	2923	1.23112	2464.18	0.413582	0.103469	3.99716	6.41057e-05	0.00149718	2340.47	0.552753	0.0958499	5.76686	8.07619e-09	3.53016e-07	2322.18	0.277827	0.0964058	2.88185	0.00395347	0.057076
ENSDARG00000011079	9	20853894	20872565	wdr3	WD repeat domain 3	.	A large ribonucleoprotein complex that is an early preribosomal complex. In S. cerevisiae, it has a size of 80S and consists of the 35S pre-rRNA, early-associating ribosomal proteins most of which are part of the small ribosomal subunit, the U3 snoRNA and associated proteins. [GOC:krc, GOC:vw, PMID:12068309, PMID:12957375, PMID:15120992, PMID:15590835];"Interacting selectively and non-covalently …	214	64	1032	921	949	1512	1081	1510	1547	1319	1511	1.74147	1254.92	0.455559	0.113197	4.02448	5.71008e-05	0.00135586	1166.81	0.551188	0.124983	4.41011	1.03318e-05	0.00023008	1197.19	0.3635	0.109481	3.3202	0.000899529	0.0179925
ENSDARG00000071500	22	12699121	12726556	fam207a	family with sequence similarity 207, member A	.	Any process specifically pertinent to the functioning of integrated living units: cells, tissues, organs, and organisms. A process is a collection of molecular events with a defined beginning and end. [GOC:go_curators, GOC:isa_complete];"The actions of a single gene product or complex at the molecular level consisting of a single biochemical activity or multiple causally linked biochemical activi…	22	5	105	108	93	162	118	163	198	130	191	2.1375	139.264	0.516115	0.151918	3.39731	0.000680509	0.00976864	124.848	0.55107	0.18064	3.05066	0.00228338	0.0214064	135.176	0.45252	0.168432	2.68666	0.00721704	0.0878687
ENSDARG00000041904	9	12834414	12886108	ankzf1	ankyrin repeat and zinc finger domain containing 1	.	The chemical reactions and pathways resulting in the breakdown of proteins transported from mitochondria and targeted to cytoplasmic proteasomes for degradation as a response to oxidative stress conditions. [GOC:mcc, PMID:21070972, PMID:21109188];"The series of steps necessary to target endoplasmic reticulum (ER)-resident proteins for degradation by the cytoplasmic proteasome. Begins with recogni…	105	26	230	285	276	370	335	403	408	354	413	2.01381	338.939	0.451593	0.105945	4.26252	2.02138e-05	0.000573928	316.114	0.548078	0.130244	4.20807	2.57557e-05	0.000506481	322.709	0.340809	0.126139	2.70186	0.00689527	0.0857223
ENSDARG00000104771	22	4447387	4466724	timm44	translocase of inner mitochondrial membrane 44 homolog (yeast)	.	A lipid bilayer along with all the proteins and protein complexes embedded in it an attached to it. [GOC:dos, GOC:mah, ISBN:0815316194];"The directed movement of proteins into, out of or within a cell, or between cells, by means of some agent such as a transporter or pore." [GOC:ai];"The import of proteins across the outer and inner mitochondrial membranes into the matrix. Unfolded proteins enter…	81	37	298	307	294	433	350	485	492	458	498	1.1304	397.339	0.509139	0.0968731	5.25573	1.47437e-07	9.82435e-06	360.677	0.548063	0.132177	4.14643	3.37701e-05	0.000636973	384.951	0.44768	0.119116	3.75836	0.000171032	0.00478342
ENSDARG00000053047	6	49995781	50011926	eif2s2	eukaryotic translation initiation factor 2, subunit 2 beta	.	Functions in the initiation of ribosome-mediated translation of mRNA into a polypeptide. [ISBN:0198506732];"The process preceding formation of the peptide bond between the first two amino acids of a protein. This includes the formation of a complex of the ribosome, mRNA or circRNA, and an initiation complex that contains the first aminoacyl-tRNA." [ISBN:019879276X]	645	154	1534	1662	1676	2535	1847	2416	2756	2248	2768	2.06637	2136.91	0.498089	0.0969343	5.13842	2.77062e-07	1.64618e-05	1942.06	0.547165	0.107956	5.06842	4.01135e-07	1.23439e-05	2072.36	0.448778	0.101711	4.41227	1.02292e-05	0.000455916
ENSDARG00000041991	11	36215698	36230163	rrp9	ribosomal RNA processing 9, small subunit (SSU) processome component, homolog (yeast)	.	.	56	8	132	136	132	234	145	194	239	193	251	2.80735	181.771	0.528871	0.140231	3.77143	0.000162315	0.00313217	162.09	0.545071	0.174737	3.11938	0.00181232	0.0175767	177.301	0.491952	0.149616	3.2881	0.00100866	0.0197841
ENSDARG00000004517	20	25625872	25639508	ppat	.	.	The chemical reactions and pathways involving a nucleoside, a nucleobase linked to either beta-D-ribofuranose (a ribonucleoside) or 2-deoxy-beta-D-ribofuranose, (a deoxyribonucleoside), e.g. adenosine, guanosine, inosine, cytidine, uridine and deoxyadenosine, deoxyguanosine, deoxycytidine and thymidine (= deoxythymidine). [GOC:ma];"The part of a cell, extracellular environment or virus in which a…	66	24	350	385	401	512	503	564	602	549	629	1.45943	494.944	0.491153	0.0860296	5.70911	1.13567e-08	1.14225e-06	452.545	0.54468	0.115879	4.70043	2.59617e-06	6.6162e-05	478.093	0.419286	0.112912	3.7134	0.000204496	0.00547798
ENSDARG00000007377	17	51743908	51760243	odc1	ornithine decarboxylase 1	liver hypoplastic;retinal photoreceptor layer quality;anterior-most region part_of head decreased size;gut hypoplastic;eye decreased size	All of the contents of a cell excluding the plasma membrane and nucleus, but including other subcellular structures. [ISBN:0198547684];"Catalysis of a biochemical reaction at physiological temperatures. In biologically catalyzed reactions, the reactants are known as substrates, and the catalysts are naturally occurring macromolecular substances known as enzymes. Enzymes possess specific binding s…	393	130	774	1383	1191	1264	1584	1851	2363	2222	2280	1.59602	1620.76	0.646223	0.144553	4.4705	7.80379e-06	0.000263292	1337.43	0.544113	0.155567	3.49761	0.000469452	0.00593584	1656.24	0.760434	0.130261	5.83775	5.29112e-09	6.05675e-07
ENSDARG00000020623	3	37776489	37785873	baxa	BCL2 associated X, apoptosis regulator a	.	Any process that activates or increases the activity of a cysteine-type endopeptidase involved in the apoptotic process. [GOC:jl, GOC:mtg_apoptosis];"The component of a membrane consisting of the gene products and protein complexes having at least some part of their peptide sequence embedded in the hydrophobic region of the membrane." [GOC:dos, GOC:go_curators];"Any process that results in a chan…	61	28	329	340	365	525	404	516	593	516	589	1.12338	458.618	0.522417	0.0915279	5.70773	1.14492e-08	1.14615e-06	412.614	0.544077	0.124926	4.35518	1.32957e-05	0.000287102	447.264	0.479321	0.114611	4.18217	2.88744e-05	0.00107245
ENSDARG00000016375	19	25656812	25678002	asns	asparagine synthetase	.	Interacting selectively and non-covalently with a nucleotide, any compound consisting of a nucleoside that is esterified with (ortho)phosphate or an oligophosphate at any hydroxyl group on the ribose or deoxyribose. [GOC:mah, ISBN:0198547684];"The chemical reactions and pathways resulting in the formation of amino acids, organic acids containing one or more amino substituents." [ISBN:0198506732];…	91	44	378	411	351	530	509	554	566	659	548	1.04836	497.082	0.476586	0.104402	4.56491	4.99701e-06	0.000184664	456.665	0.542762	0.12707	4.27136	1.94282e-05	0.000397041	478.522	0.396289	0.123543	3.2077	0.001338	0.024633
ENSDARG00000001829	24	24101811	24118451	zgc:112982	zgc:112982	.	The actions of a single gene product or complex at the molecular level consisting of a single biochemical activity or multiple causally linked biochemical activities. A given gene product may exhibit one or more molecular functions. [GOC:go_curators];"The part of a cell, extracellular environment or virus in which a gene product is located. A gene product may be located in one or more parts of a …	108	37	649	697	718	1246	649	1032	1164	903	904	1.54543	877.173	0.408036	0.14836	2.75032	0.00595376	0.0494554	828.816	0.542146	0.15496	3.49862	0.000467665	0.0059256	826.908	0.303369	0.110393	2.74809	0.00599443	0.0778979
ENSDARG00000054980	2	13694450	13721149	ebna1bp2	EBNA1 binding protein 2	extension decreased thickness;pigment cell quality;yolk circular;whole organism viability;fourth ventricle distended;brain quality;anterior region part_of trunk decreased thickness;axis part_of whole organism decreased pigmentation;hindbrain quality;whole organism shape;anterior-most region part_of head decreased size;yolk grey;yolk quality;eye decreased size;developmental pigmentation delayed;tr…	A small, dense body one or more of which are present in the nucleus of eukaryotic cells. It is rich in RNA and protein, is not bounded by a limiting membrane, and is not seen during mitosis. Its prime function is the transcription of the nucleolar DNA into 45S ribosomal-precursor RNA, the processing of this RNA into 5.8S, 18S, and 28S components of ribosomal RNA, and the association of these comp…	141	18	418	411	370	650	446	583	665	534	624	2.96963	518.347	0.447886	0.123399	3.62959	0.000283872	0.00490356	479.941	0.532109	0.141261	3.76685	0.000165321	0.0024811	496.953	0.364258	0.124449	2.92696	0.0034229	0.0510342
ENSDARG00000003217	13	24231327	24263682	urb2	URB2 ribosome biogenesis 2 homolog (S. cerevisiae)	.	A cellular process that results in the biosynthesis of constituent macromolecules, assembly, and arrangement of constituent parts of ribosome subunits; includes transport to the sites of protein synthesis. [GOC:ma, PMID:26404467, Wikipedia:Ribosome_biogenesis];"A small, dense body one or more of which are present in the nucleus of eukaryotic cells. It is rich in RNA and protein, is not bounded by…	125	19	404	411	382	619	434	616	629	550	653	2.71786	517.358	0.455564	0.114764	3.96956	7.20043e-05	0.0016456	477.049	0.528676	0.135495	3.90181	9.54759e-05	0.00156005	497.925	0.378892	0.119634	3.16709	0.00153974	0.0274203
ENSDARG00000101576	19	14187540	14191592	tbxta	T-box transcription factor Ta	calmodulin-dependent protein kinase activity decreased rate;pronephric glomerulus morphogenesis process quality;Golgi apparatus part_of notochord morphology;Golgi apparatus part_of notochord structure;Kupffer's vesicle unlumenized;horizontal myoseptum hypoplastic;Rohon-Beard neuron increased amount;myoseptum quality;medial side part_of somite fused with BSPO:0000067;somite U-shaped;post-anal tail…	The tube morphogenesis process in which the primitive heart tube loops asymmetrically. This looping brings the primitive heart chambers into alignment preceding their future integration. Heart looping begins with dextral-looping and ends when the main regional divisions of the mature heart and primordium of the great arterial trunks become established preceeding septation. [GOC:dph, PMID:12094232…	72	22	80	96	110	135	111	157	179	150	146	1.71049	127.409	0.512402	0.130566	3.92446	8.6923e-05	0.00192467	114.283	0.524617	0.180275	2.91009	0.00361329	0.0306455	124.166	0.448679	0.15941	2.81462	0.00488349	0.0669111
ENSDARG00000063596	15	1749843	1765137	bud23	BUD23, rRNA methyltransferase and ribosome maturation factor	.	Catalysis of the transfer of a methyl group to an acceptor molecule. [ISBN:0198506732];"The addition of a methyl group to the N7 atom in the base portion of a guanine nucleotide residue in an rRNA molecule." [GOC:mah];"Catalysis of the reaction: S-adenosyl-L-methionine + rRNA = S-adenosyl-L-homocysteine + rRNA containing methylguanine." [EC:2.1.1.-];"A small, dense body one or more of which are p…	30	4	165	150	161	240	171	257	307	212	252	2.90689	210.132	0.482546	0.134495	3.58783	0.000333444	0.0055547	190.225	0.523263	0.16158	3.23842	0.00120195	0.0128061	204.289	0.424617	0.148971	2.85032	0.00436749	0.061776
ENSDARG00000099774	7	67733759	67744619	cyb5b	cytochrome b5 type B	.	Interacting selectively and non-covalently with heme, any compound of iron complexed in a porphyrin (tetrapyrrole) ring. [CHEBI:30413, GOC:ai];"Interacting selectively and non-covalently with any metal ion." [GOC:ai];"A lipid bilayer along with all the proteins and protein complexes embedded in it an attached to it." [GOC:dos, GOC:mah, ISBN:0815316194];"The component of a membrane consisting of t…	36	17	378	417	407	563	489	594	723	625	761	1.08246	542.828	0.556312	0.0904539	6.15023	7.73719e-10	1.11473e-07	474.337	0.520065	0.116423	4.46702	7.93171e-06	0.000182133	541.218	0.566049	0.115798	4.88826	1.01731e-06	6.47654e-05
ENSDARG00000074526	15	18253542	18361475	zbtb16b	zinc finger and BTB domain containing 16b	.	Any process that activates or increases the frequency, rate, or extent of type I interferon production. Type I interferons include the interferon-alpha, beta, delta, episilon, zeta, kappa, tau, and omega gene families. [GOC:add, GOC:mah];"A membrane-bounded organelle of eukaryotic cells in which chromosomes are housed and replicated. In most cells, the nucleus contains all of the cell's chromosom…	371	33	491	519	531	668	593	853	928	743	623	3.49088	653.922	0.425072	0.118393	3.59034	0.00033025	0.00551442	607.17	0.515752	0.12011	4.29399	1.75491e-05	0.000364215	628.861	0.338949	0.123406	2.74661	0.00602144	0.0782003
ENSDARG00000002720	18	7037349	7056760	utp15	utp15, U3 small nucleolar ribonucleoprotein, homolog	upper region part_of head flattened;anterior region part_of trunk decreased thickness;negative regulation of angiogenesis increased occurrence;central nervous system necrotic;liver hypoplastic;filopodium part_of intersegmental vessel decreased length;trunk decreased length;dorsal longitudinal anastomotic vessel aplastic;whole organism quality;eye decreased size;gut hypoplastic;caudal vein plexus …	Any process that activates or increases angiogenesis. [GOC:go_curators];"A small, dense body one or more of which are present in the nucleus of eukaryotic cells. It is rich in RNA and protein, is not bounded by a limiting membrane, and is not seen during mitosis. Its prime function is the transcription of the nucleolar DNA into 45S ribosomal-precursor RNA, the processing of this RNA into 5.8S, 18…	59	11	278	338	301	472	342	443	518	381	526	2.42321	395.825	0.451794	0.125261	3.60682	0.000309975	0.00527501	361.777	0.510586	0.137981	3.70041	0.000215255	0.00307903	384.242	0.389737	0.135527	2.87572	0.00403112	0.0578779
ENSDARG00000052741	3	41558682	41632059	card11	.	.	Any process that modulates the occurrence or rate of cell death by apoptotic process. [GOC:jl, GOC:mtg_apoptosis];"Any process that activates or increases the frequency, rate or extent of activity of the transcription factor NF-kappaB." [GOC:dph, GOC:tb, PMID:15087454, PMID:15170030]	23	8	212	246	220	340	241	355	394	290	365	1.52356	292.648	0.449791	0.126485	3.55609	0.000376417	0.00610832	268.23	0.51035	0.148928	3.42682	0.000610687	0.00740592	283.361	0.380625	0.13765	2.76517	0.00568939	0.0750039
ENSDARG00000098859	21	520479	536970	CABZ01079760.1	.	.	The component of a membrane consisting of the gene products and protein complexes having at least some part of their peptide sequence embedded in the hydrophobic region of the membrane. [GOC:dos, GOC:go_curators];"A lipid bilayer along with all the proteins and protein complexes embedded in it an attached to it." [GOC:dos, GOC:mah, ISBN:0815316194];"A large ribonucleoprotein complex that is an ea…	237	66	427	355	360	542	473	550	689	519	569	1.84435	494.078	0.45192	0.11588	3.89988	9.6239e-05	0.00208759	452.24	0.507511	0.135035	3.75838	0.000171017	0.00255223	479.601	0.385572	0.132332	2.91367	0.00357208	0.0526957
ENSDARG00000006219	11	3959495	3971035	gnl3	guanine nucleotide binding protein-like 3 (nucleolar)	postoptic commissure morphology;midbrain hindbrain boundary decreased thickness;retinal ganglion cell layer immature;yolk grey;astrocyte part_of anterior commissure mislocalised;axon part_of forebrain decreased size;integument discolored;large ribosomal subunit part_of whole organism decreased amount;optic tectum apoptotic;cell projection part_of radial glial cell disorganized;neuron differentiat…	Interacting selectively and non-covalently with GTP, guanosine triphosphate. [GOC:ai]	365	66	1052	972	941	1402	1191	1438	1540	1399	1540	2.46736	1265.43	0.439976	0.0934869	4.70628	2.52273e-06	0.000102853	1167.28	0.505368	0.113724	4.44379	8.83883e-06	0.00019996	1224.73	0.365948	0.108002	3.38833	0.00070319	0.0149093
ENSDARG00000092546	12	19199735	19204444	pdap1a	pdgfa associated protein 1a	.	.	85	11	383	448	429	540	530	635	630	600	674	2.94996	536.204	0.444996	0.089179	4.98992	6.04033e-07	3.06662e-05	493.629	0.504523	0.117075	4.30941	1.63694e-05	0.000342395	519.551	0.370797	0.112551	3.29449	0.000986011	0.0194666
ENSDARG00000099528	19	420350	432083	dus3l	dihydrouridine synthase 3-like (S. cerevisiae)	.	Catalysis of a biochemical reaction at physiological temperatures. In biologically catalyzed reactions, the reactants are known as substrates, and the catalysts are naturally occurring macromolecular substances known as enzymes. Enzymes possess specific binding sites for substrates, and are usually composed wholly or largely of protein, but RNA that has catalytic activity (ribozyme) is often also…	58	27	290	291	271	415	329	420	441	407	423	1.10309	362.39	0.431465	0.103391	4.17314	3.00437e-05	0.000796329	335.983	0.504019	0.135442	3.72129	0.00019821	0.00288547	349.203	0.34247	0.122849	2.78773	0.00530791	0.0712757
ENSDARG00000021547	13	26780004	26799244	vrk2	vaccinia related kinase 2	.	Catalysis of the reactions: ATP + protein serine = ADP + protein serine phosphate, and ATP + protein threonine = ADP + protein threonine phosphate. [GOC:bf];"The phosphorylation of peptidyl-serine to form peptidyl-O-phospho-L-serine." [RESID:AA0037];"A membrane-bounded organelle of eukaryotic cells in which chromosomes are housed and replicated. In most cells, the nucleus contains all of the cell…	6	2	84	112	79	148	113	124	165	157	171	1.58496	126.441	0.544762	0.144077	3.78105	0.00015617	0.00304667	110.248	0.503889	0.193787	2.60022	0.00931631	0.0636381	125.581	0.526163	0.164665	3.19535	0.00139664	0.0254628
ENSDARG00000054259	18	38213778	38245062	nat10	N-acetyltransferase 10	.	Catalysis of the transfer of an acyl group from one compound (donor) to another (acceptor). [GOC:jl, ISBN:0198506732];"A membrane-bounded organelle of eukaryotic cells in which chromosomes are housed and replicated. In most cells, the nucleus contains all of the cell's chromosomes except the organellar chromosomes, and is the site of RNA synthesis and processing. In some species, or in specialize…	267	56	681	651	639	949	755	958	1046	888	956	2.25334	829.584	0.413548	0.0988156	4.18505	2.85109e-05	0.000765665	772.06	0.495199	0.11733	4.22056	2.43698e-05	0.000482337	799.823	0.325945	0.10934	2.98102	0.00287286	0.0444794
ENSDARG00000006642	3	40153819	40162867	drg2	developmentally regulated GTP binding protein 2	.	Any process specifically pertinent to the functioning of integrated living units: cells, tissues, organs, and organisms. A process is a collection of molecular events with a defined beginning and end. [GOC:go_curators, GOC:isa_complete];"Interacting selectively and non-covalently with GTP, guanosine triphosphate." [GOC:ai]	56	22	375	422	354	599	408	551	614	507	614	1.34792	489.387	0.421597	0.121681	3.46478	0.00053067	0.00809405	451.058	0.486695	0.142095	3.42514	0.000614476	0.0074392	474.559	0.354694	0.125401	2.82849	0.00467689	0.0650541
ENSDARG00000053155	2	44972720	44981344	alg3	asparagine-linked glycosylation 3 (alpha-1,3-mannosyltransferase)	.	Catalysis of the reaction: an alpha-D-man-(1->2)-alpha-D-Man-(1->2)-alpha-D-Man-(1->3)-(alpha-D-Man-(1->6))-beta-D-Man-(1->4)-beta-D-GlcNAc-(1->4)-D-GlcNAc-diphosphodolichol + dolichyl D-mannosyl phosphate = H(+) + alpha-D-Man-(1->2)-alpha-D-Man-(1->2)-alpha-D-Man-(1->3)-(alpha-D-Man-(1->3)-alpha-D-Man-(1->6))-beta-D-Man-(1->4)-beta-D-GlcNAc-(1->4)-D-GlcNAc-diphosphodolichol + dolichyl phosphate.…	32	7	529	502	515	751	579	744	826	715	809	2.19265	657.147	0.435464	0.0955297	4.55842	5.1541e-06	0.000188833	602.888	0.485334	0.121217	4.00384	6.2322e-05	0.00107944	640.24	0.374931	0.111378	3.3663	0.000761827	0.015843
ENSDARG00000100954	17	734133	735537	wars	.	.	Interacting selectively and non-covalently with ATP, adenosine 5'-triphosphate, a universally important coenzyme and enzyme regulator. [ISBN:0198506732];"Catalysis of the reaction: ATP + L-tryptophan + tRNA(Trp) = AMP + diphosphate + L-tryptophanyl-tRNA(Trp)." [EC:6.1.1.2];"All of the contents of a cell excluding the plasma membrane and nucleus, but including other subcellular structures." [ISBN:…	18	4	115	129	118	168	152	171	226	189	206	2.16993	161.594	0.518707	0.116689	4.44523	8.77998e-06	0.000288475	142.269	0.484397	0.16516	2.93289	0.00335819	0.0289158	160.747	0.498318	0.148723	3.35065	0.000806219	0.0165251
ENSDARG00000104227	7	1505507	1508912	nop10	NOP10 ribonucleoprotein homolog (yeast)	gut hypoplastic;anterior-most region part_of head decreased size;eye decreased size;liver immature;posterior chamber swim bladder uninflated;heart quality;ribosomal small subunit assembly disrupted;cell part_of whole organism dead;gut immature;pericardium edematous;midbrain hindbrain boundary morphology;hematopoietic stem cell part_of dorsal aorta decreased amount;hemoglobin complex part_of nucle…	A small, dense body one or more of which are present in the nucleus of eukaryotic cells. It is rich in RNA and protein, is not bounded by a limiting membrane, and is not seen during mitosis. Its prime function is the transcription of the nucleolar DNA into 45S ribosomal-precursor RNA, the processing of this RNA into 5.8S, 18S, and 28S components of ribosomal RNA, and the association of these comp…	23	6	328	306	301	491	329	436	521	401	498	1.9386	397.544	0.417913	0.12574	3.32362	0.000888574	0.012007	365.001	0.474217	0.146305	3.24128	0.00118993	0.0127061	387.191	0.359755	0.130415	2.75853	0.00580624	0.0760284
ENSDARG00000108136	KN150679.1	255	12836	CABZ01113599.1	.	.	.	92	45	157	192	192	225	215	277	265	278	297	1.03171	230.386	0.441951	0.106319	4.15683	3.22696e-05	0.00084324	208.973	0.462907	0.148024	3.12724	0.00176458	0.0171761	226.43	0.391932	0.135752	2.88712	0.00388789	0.0562067
ENSDARG00000044685	16	54875530	54880550	nr0b2a	nuclear receptor subfamily 0, group B, member 2a	.	The cellular synthesis of RNA on a template of DNA. [GOC:jl, GOC:txnOH];"A series of molecular signals mediated by a steroid hormone binding to a receptor." [PMID:12606724];"Any process that modulates the frequency, rate or extent of cellular DNA-templated transcription." [GOC:go_curators, GOC:txnOH];"Any molecular function by which a gene product interacts selectively and non-covalently with DNA…	40	16	313	300	291	327	449	420	993	708	897	1.32193	504.153	0.752718	0.193217	3.89572	9.79074e-05	0.00211597	351.479	0.46101	0.152163	3.02971	0.00244785	0.0226108	564.12	1.18597	0.129289	9.173	4.60039e-20	2.93075e-17
ENSDARG00000019765	1	55169130	55183088	LUC7L2	zgc:158803	.	A spliceosomal complex that is formed by association of the 5' splice site with the U1 snRNP, while the branch point sequence is recognized by the U2 snRNP. The prespliceosome includes many proteins in addition to those found in the U1 and U2 snRNPs. Commitment to a given pair of 5' and 3' splice sites occurs at the time of prespliceosome formation. [GOC:ab, GOC:krc, GOC:mah, PMID:17332742, PMID:…	536	61	404	438	487	540	499	710	746	615	647	3.13535	558.04	0.421058	0.0959135	4.38998	1.13362e-05	0.000354951	510.539	0.460346	0.123796	3.71858	0.000200347	0.00291062	546.974	0.371599	0.110541	3.36165	0.000774782	0.0160377
ENSDARG00000003527	8	45394914	45416187	mak16	MAK16 homolog (S. cerevisiae)	yolk grey;astrocyte part_of anterior commissure mislocalised;axon part_of hindbrain mislocalised;cranial nerve II absent;postoptic commissure morphology;anterior commissure morphology;anterior commissure defasciculated;cell projection part_of radial glial cell disorganized;anterior-posterior axis part_of whole organism curved ventral;commissural neuron axon guidance occurs_in anterior commissure …	A membrane-bounded organelle of eukaryotic cells in which chromosomes are housed and replicated. In most cells, the nucleus contains all of the cell's chromosomes except the organellar chromosomes, and is the site of RNA synthesis and processing. In some species, or in specialized cell types, RNA metabolism or DNA replication may be absent. [GOC:go_curators];"A small, dense body one or more of wh…	163	16	620	578	569	870	580	901	1016	747	866	3.34873	741.855	0.394842	0.125462	3.1471	0.00164901	0.0193963	684.422	0.459594	0.138081	3.32844	0.000873326	0.00985249	722.845	0.336965	0.121827	2.76593	0.00567608	0.0748757
ENSDARG00000109961	21	36381960	36396334	mrpl22	.	.	The larger of the two subunits of a ribosome. Two sites on the ribosomal large subunit are involved in translation, namely the aminoacyl site (A site) and peptidyl site (P site). [ISBN:0198506732];"An intracellular organelle, about 200 A in diameter, consisting of RNA and protein. It is the site of protein biosynthesis resulting from translation of messenger RNA (mRNA). It consists of two subunit…	15	3	151	171	188	248	180	247	299	242	272	2.32193	218.893	0.454683	0.113319	4.01243	6.00968e-05	0.00141596	196.669	0.457407	0.154233	2.96568	0.00302013	0.0265861	216.462	0.422636	0.137466	3.07447	0.00210877	0.0348391
ENSDARG00000008784	2	32812402	32826108	prpf4ba	pre-mRNA processing factor 4Ba	.	The process of introducing a phosphate group on to a protein. [GOC:hb];"Interacting selectively and non-covalently with ATP, adenosine 5'-triphosphate, a universally important coenzyme and enzyme regulator." [ISBN:0198506732];"A membrane-bounded organelle of eukaryotic cells in which chromosomes are housed and replicated. In most cells, the nucleus contains all of the cell's chromosomes except th…	194	44	1101	1235	1300	1870	1181	1732	1938	1643	1727	2.14048	1508.6	0.391501	0.109905	3.56218	0.000367785	0.00600941	1396.82	0.457386	0.127367	3.59109	0.000329297	0.00443689	1468.22	0.332741	0.094032	3.53859	0.000402272	0.00948963
ENSDARG00000098627	3	36646054	36664310	gspt1l	G1 to S phase transition 1, like	.	The part of the cytoplasm that does not contain organelles but which does contain other particulate matter, such as protein complexes. [GOC:hjd, GOC:jl];"The process resulting in the release of a polypeptide chain from the ribosome in the cytoplasm, usually in response to a termination codon." [GOC:hjd];"Involved in catalyzing the release of a nascent polypeptide chain from a ribosome." [ISBN:019…	820	288	3023	3147	3308	4107	3888	4298	4940	4215	4570	1.50956	3912.18	0.39253	0.0704954	5.56817	2.57432e-08	2.20825e-06	3627.33	0.456655	0.0856127	5.33396	9.60916e-08	3.35864e-06	3813.57	0.3221	0.0879807	3.66103	0.000251199	0.00643431
ENSDARG00000014366	3	58805790	58823762	luc7l3	LUC7-like 3 pre-mRNA splicing factor	.	Selection of a splice site by components of the assembling spliceosome. [GOC:krc, ISBN:0879695897];"A spliceosomal complex that is formed by association of the 5' splice site with the U1 snRNP, while the branch point sequence is recognized by the U2 snRNP. The prespliceosome includes many proteins in addition to those found in the U1 and U2 snRNPs. Commitment to a given pair of 5' and 3' splice s…	471	152	755	898	798	1258	827	1135	1296	1132	1139	1.63166	1016.59	0.385623	0.111149	3.46943	0.000521572	0.00797239	942.689	0.452885	0.131185	3.45228	0.000555874	0.00685715	989.056	0.320989	0.104285	3.07799	0.00208401	0.0345378
ENSDARG00000102571	25	3231812	3247343	metap2b	.	non-canonical Wnt signaling pathway disrupted;convergent extension involved in axis elongation disrupted;cell migration involved in sprouting angiogenesis disrupted;protein phosphorylation increased occurrence;protein initiator methionine removal decreased occurrence;cell junction part_of intersegmental vessel morphology;myeloid cell differentiation process quality;post-anal tail morphogenesis di…	The protein modification process in which the translation-initiating methionine or formylmethionine residue is removed from a protein. [GOC:imk, GOC:mah];"Catalysis of the hydrolysis of N-terminal amino acid residues from in a polypeptide chain." [GOC:jl, ISBN:0198506732];"A second wave of blood cell production that, in vertebrates, generates long-term hemopoietic stem cells that continously prov…	360	144	2066	2254	2325	3083	2468	3071	3833	3064	3509	1.32193	2817	0.44329	0.0779878	5.68409	1.31509e-08	1.29823e-06	2538.85	0.452004	0.0948202	4.76696	1.87029e-06	4.94943e-05	2794.24	0.426608	0.0960656	4.4408	8.96249e-06	0.000412629
ENSDARG00000053912	16	42177659	42186093	fbl	fibrillarin	anterior region part_of trunk decreased thickness;fourth ventricle distended;central nervous system necrotic;extension decreased thickness;liver quality;yolk circular;liver hypoplastic;hindbrain quality;gut quality;anterior-most region part_of head decreased size;yolk grey;gut hypoplastic;eye decreased size;midbrain hindbrain boundary quality;brain necrotic;midbrain hindbrain boundary condensed	Catalysis of the reaction: S-adenosyl-L-methionine + (histone)-glutamine = S-adenosyl-L-homocysteine + (histone)-N5-methyl-glutamine. [PMID:24352239];"A small, dense body one or more of which are present in the nucleus of eukaryotic cells. It is rich in RNA and protein, is not bounded by a limiting membrane, and is not seen during mitosis. Its prime function is the transcription of the nucleolar …	360	66	824	819	751	1135	899	1096	1329	1093	1353	2.44746	1022.2	0.438887	0.101017	4.34469	1.39475e-05	0.00042365	920.887	0.45014	0.118395	3.80202	0.000143523	0.0022029	1013.34	0.419249	0.115855	3.61873	0.000296049	0.00731324
ENSDARG00000110258	11	12256431	12256727	RF00017	.	.	.	946	311	263	309	332	317	417	445	467	489	450	1.60493	383.346	0.433871	0.109538	3.96091	7.46661e-05	0.00169309	346.796	0.448938	0.144958	3.09702	0.0019548	0.0187794	378.33	0.408253	0.116761	3.49648	0.000471439	0.0107578
ENSDARG00000078077	7	41322407	41330966	dph2	DPH2 homolog (S. cerevisiae)	.	Catalysis of the transfer of a group, e.g. a methyl group, glycosyl group, acyl group, phosphorus-containing, or other groups, from one compound (generally regarded as the donor) to another compound (generally regarded as the acceptor). Transferase is the systematic name for any enzyme of EC class 2. [ISBN:0198506732];"The modification of peptidyl-histidine to 2'-(3-carboxamido-3-(trimethylammoni…	41	14	322	324	307	451	331	467	558	413	541	1.5502	407.49	0.434954	0.11864	3.66615	0.000246225	0.00436708	366.209	0.444187	0.137436	3.23195	0.0012295	0.0129986	404.543	0.416221	0.131656	3.16142	0.00157002	0.0276609
ENSDARG00000015524	5	23136544	23147665	prps1a	phosphoribosyl pyrophosphate synthetase 1A	cell part_of retina decreased amount;neuromast hair cell decreased amount;retina development in camera-type eye delayed;3'5'-cyclic AMP part_of whole organism decreased amount;retina development in camera-type eye process quality;retina layer formation arrested;retina layer formation delayed;proliferative region part_of retina increased amount;iridophore decreased amount;retina layer formation pr…	Interacting selectively and non-covalently with magnesium (Mg) ions. [GOC:ai];"The chemical reactions and pathways resulting in the formation of a ribonucleoside monophosphate, a compound consisting of a nucleobase linked to a ribose sugar esterified with phosphate on the sugar." [GOC:go_curators, ISBN:0198506732];"Catalysis of the reaction: D-ribose 5-phosphate + ATP = 5-phospho-alpha-D-ribose 1…	367	53	1062	1152	1039	1372	1236	1546	1627	1529	1412	2.79172	1320.01	0.350437	0.0856364	4.09215	4.27399e-05	0.00106715	1232.97	0.422257	0.106242	3.97448	7.0533e-05	0.00120408	1287.9	0.271757	0.100846	2.69477	0.00704365	0.0865398
ENSDARG00000006200	2	16798652	16842699	eif4g1a	.	.	The process preceding formation of the peptide bond between the first two amino acids of a protein. This includes the formation of a complex of the ribosome, mRNA or circRNA, and an initiation complex that contains the first aminoacyl-tRNA. [ISBN:019879276X];"The part of a cell, extracellular environment or virus in which a gene product is located. A gene product may be located in one or more par…	2320	816	2860	3352	3117	3569	3811	4430	4195	4413	4295	1.50748	3755.32	0.339569	0.0851887	3.98607	6.71758e-05	0.00155357	3518.22	0.416841	0.100761	4.13692	3.52006e-05	0.000658847	3661.62	0.2592	0.0901427	2.87544	0.00403459	0.057888
ENSDARG00000063295	6	7735806	7776612	myh9a	myosin, heavy chain 9a, non-muscle	cell projection part_of pronephric podocyte inserted into;ventral region part_of whole organism edematous;glomerular capillary formation disrupted;eye pigmentation disrupted;pronephric glomerular basement membrane decreased permeability;glomerular filtration decreased process quality;mesangial cell part_of pronephros decreased amount;pronephric glomerulus morphology;capillary loop nephron part_of…	Catalysis of the generation of force resulting either in movement along a microfilament or microtubule, or in torque resulting in membrane scission, coupled to the hydrolysis of a nucleoside triphosphate. [GOC:mah, GOC:vw, ISBN:0815316194, PMID:11242086];"Interacting selectively and non-covalently with an actin filament, also known as F-actin, a helical filamentous polymer of globular G-actin sub…	1634	591	3894	4045	4079	5186	5057	4892	5592	5369	5579	1.46718	4829.34	0.334701	0.0838988	3.98934	6.62571e-05	0.001539	4532.43	0.41497	0.0990515	4.18944	2.79646e-05	0.000545399	4705.62	0.252568	0.0841095	3.00284	0.00267469	0.042016
ENSDARG00000104837	19	14158075	14169457	nudc	nudC nuclear distribution protein	cilium part_of pronephric duct decreased coordination;brain hydrocephalic;anterior region part_of pronephric duct dilated;pericardium edematous;epithelial cilium movement occurs_in pronephric duct process quality;cilium part_of Kupffer's vesicle increased length;cilium part_of pronephric duct disorganized;anterior-posterior axis part_of whole organism curved lateral;pronephric duct dilated;heart …	Determination of the asymmetric location of the heart with respect to the left and right halves of the organism. [GOC:dph, GOC:mtg_heart];"The assembly of a cilium, a specialized eukaryotic organelle that consists of a filiform extrusion of the cell surface. Each cilium is bounded by an extrusion of the cytoplasmic membrane, and contains a regular longitudinal array of microtubules, anchored basa…	154	29	432	414	466	609	486	567	684	574	631	2.40881	535.48	0.363204	0.0924337	3.92934	8.5178e-05	0.00188996	495.037	0.411933	0.1211	3.40159	0.000669949	0.00799298	526.274	0.304188	0.112152	2.7123	0.00668186	0.0838656
ENSDARG00000040295	16	23960744	23963461	apoeb	apolipoprotein Eb	.	The acquisition, loss or modification of a protein or lipid within a very-low-density lipoprotein particle, including the hydrolysis of triglyceride by hepatic lipase or lipoprotein lipase and the subsequent loss of free fatty acid. [GOC:BHF, GOC:expert_pt, GOC:mah, GOC:rl];"Any process that stops, prevents, or reduces the frequency, rate or extent of cell death by apoptotic process in neurons." …	2047	992	6621	7069	6682	8317	8450	8675	13504	9279	12939	1.0451	8915.14	0.478818	0.117576	4.07241	4.65294e-05	0.00115232	7642.94	0.400907	0.0959533	4.17815	2.93891e-05	0.000568934	9169.82	0.559475	0.118391	4.72567	2.29356e-06	0.000129154
ENSDARG00000098802	16	35661331	35776074	map7d1a	MAP7 domain containing 1a	.	The part of the cytoskeleton (the internal framework of a cell) composed of microtubules and associated proteins. [GOC:jl, ISBN:0395825172];"A process that is carried out at the cellular level which results in the assembly, arrangement of constituent parts, or disassembly of cytoskeletal structures comprising microtubules and their associated proteins." [GOC:mah]	241	102	493	562	577	722	572	754	815	746	838	1.24046	667.756	0.375084	0.0825215	4.54529	5.4859e-06	0.000198264	610.94	0.39964	0.114193	3.49969	0.000465798	0.00591414	662.092	0.338289	0.105429	3.2087	0.00133335	0.0246089
ENSDARG00000015352	11	34219991	34232906	lsg1	.	.	Interacting selectively and non-covalently with GTP, guanosine triphosphate. [GOC:ai]	109	40	601	578	631	826	588	868	1007	775	892	1.44626	742.649	0.367734	0.106201	3.46261	0.000534968	0.00813631	679.125	0.396284	0.125379	3.16069	0.00157397	0.0157073	736.624	0.33698	0.112631	2.99188	0.00277266	0.0432799
ENSDARG00000102333	17	49457158	49481672	fcf1	FCF1 rRNA-processing protein	.	Any process involved in the maturation of a precursor Small SubUnit (SSU) ribosomal RNA (rRNA) molecule into a mature SSU-rRNA molecule from the pre-rRNA molecule originally produced as a tricistronic rRNA transcript that contains the Small Subunit (SSU) rRNA, 5.8S rRNA, and the Large Subunit (LSU) in that order from 5' to 3' along the primary transcript. [GOC:curators];"A small, dense body one o…	54	14	267	321	286	405	316	378	431	430	496	1.94753	365.661	0.406212	0.104466	3.88845	0.000100886	0.00216054	328.292	0.395735	0.136307	2.90326	0.00369295	0.0311849	366.311	0.397087	0.126215	3.14612	0.0016545	0.0286671
ENSDARG00000105117	21	9366967	9384374	sdad1	SDA1 domain containing 1	gut hypoplastic;anterior-most region part_of head decreased size;yolk grey;mandibular arch skeleton aplastic;eye decreased size;liver quality;yolk circular;heart quality;liver hypoplastic;pericardium edematous;gut quality	The directed movement of a ribosomal large subunit from the nucleus into the cytoplasm. [GOC:mah];"A process that is carried out at the cellular level which results in the assembly, arrangement of constituent parts, or disassembly of cytoskeletal structures comprising actin filaments and their associated proteins." [GOC:dph, GOC:jl, GOC:mah];"The living contents of a cell; the matter contained wi…	194	48	915	738	766	1184	743	1139	1477	1043	1232	2.01495	1013.18	0.379003	0.137333	2.75974	0.00578468	0.0485826	912.248	0.386649	0.148493	2.60382	0.00921916	0.063104	1014.15	0.381896	0.1304	2.92866	0.0034043	0.0508653
ENSDARG00000015889	9	11664797	11676491	zc3h15	zinc finger CCCH-type containing 15	.	Interacting selectively and non-covalently with any metal ion. [GOC:ai]	149	38	870	917	855	1075	977	1149	1335	1197	1209	1.97124	1055.03	0.323179	0.0731274	4.41939	9.89793e-06	0.000317374	972.708	0.351279	0.105724	3.32261	0.00089178	0.0100092	1050.95	0.283665	0.100901	2.81133	0.00493376	0.0674184
ENSDARG00000058992	16	1362250	1399328	cers2b	ceramide synthase 2b	.	A lipid bilayer along with all the proteins and protein complexes embedded in it an attached to it. [GOC:dos, GOC:mah, ISBN:0815316194];"The component of a membrane consisting of the gene products and protein complexes having at least some part of their peptide sequence embedded in the hydrophobic region of the membrane." [GOC:dos, GOC:go_curators];"The chemical reactions and pathways resulting i…	476	59	976	1113	1010	1258	1299	1127	1603	1461	1861	3.01217	1285.89	0.384326	0.113904	3.37414	0.000740479	0.0104495	1132.99	0.331575	0.122673	2.70291	0.00687348	0.0508452	1316.97	0.436565	0.112903	3.86671	0.000110313	0.00333935
ENSDARG00000028198	24	35522301	35534273	ube2v2	ubiquitin-conjugating enzyme E2 variant 2	.	All of the contents of a cell excluding the plasma membrane and nucleus, but including other subcellular structures. [ISBN:0198547684];"Catalysis of the transfer of ubiquitin to a substrate protein via the reaction X-ubiquitin + S -> X + S-ubiquitin, where X is either an E2 or E3 enzyme, the X-ubiquitin linkage is a thioester bond, and the S-ubiquitin linkage is an amide bond: an isopeptide bond …	136	46	1311	1282	1393	1597	1412	1678	1998	1679	1939	1.5639	1571.14	0.300854	0.0724889	4.15034	3.31981e-05	0.00086222	1441.85	0.313308	0.0957375	3.27257	0.00106574	0.011565	1580.44	0.280367	0.098865	2.83585	0.00457035	0.0639971
ENSDARG00000037932	3	31933893	31944709	lin7b	lin-7 homolog B (C. elegans)	.	The regulated release of neurotransmitter from the presynapse into the synaptic cleft via calcium-regulated exocytosis during synaptic transmission. [CHEBI:25512, GOC:dph];"Interacting selectively and non-covalently with a L27 domain of a protein. L27 is composed of conserved negatively charged amino acids and a conserved aromatic amino acid. L27 domains can assemble proteins involved in signalin…	2	36	443	495	536	392	377	465	494	488	445	-4.16993	455.964	-0.19933	0.0782036	-2.54886	0.0108076	0.0767244	446.945	-0.158674	0.117454	-1.35094	0.176715	0.467996	482.719	-0.22421	0.108706	-2.06254	0.0391565	0.271579
ENSDARG00000045014	11	3336524	3343463	tuba2	tubulin, alpha 2	.	Any of the various filamentous elements that form the internal framework of cells, and typically remain after treatment of the cells with mild detergent to remove membrane constituents and soluble components of the cytoplasm. The term embraces intermediate filaments, microfilaments, microtubules, the microtrabecular lattice, and other structures characterized by a polymeric filamentous nature and…	7	167	3860	3967	4511	3440	3256	3551	3934	4169	3826	-4.57635	3810.92	-0.206292	0.0571264	-3.61114	0.000304853	0.00520864	3734.08	-0.170087	0.0865681	-1.96477	0.0494403	0.211254	4040.98	-0.233089	0.0839187	-2.77756	0.0054768	0.0728895
ENSDARG00000100753	KN150405.1	1010	65756	CABZ01076275.1	scavenger receptor class B, member 2b	.	Combining with an extracellular or intracellular messenger to initiate a change in cell activity. [GOC:ceb, ISBN:0198506732];"A small lytic vacuole that has cell cycle-independent morphology and is found in most animal cells and that contains a variety of hydrolases, most of which have their maximal activities in the pH range 5-6. The contained enzymes display latency if properly isolated. About …	54	241	2108	2211	2529	1760	1908	1967	2173	2489	2186	-2.158	2131.98	-0.184958	0.0753359	-2.45511	0.0140841	0.0921215	2064.28	-0.179281	0.0984354	-1.8213	0.0685607	0.262916	2277.66	-0.18332	0.0932998	-1.96485	0.0494318	0.312933
ENSDARG00000015869	20	31287356	31305503	slc22a16	solute carrier family 22 (organic cation/carnitine transporter), member 16	.	Enables the transfer of a substance, usually a specific substance or a group of related substances, from one side of a membrane to the other. [GOC:jid, GOC:mtg_transport, ISBN:0815340729];"The process in which a solute is transported across a lipid bilayer, from one side of a membrane to the other." [GOC:dph, GOC:jid];"The directed movement of organic anions into, out of or within a cell, or betw…	6	13	414	380	421	331	302	371	320	360	341	-1.11548	359.677	-0.298484	0.109607	-2.72323	0.00646476	0.0526741	366.993	-0.179727	0.126792	-1.41749	0.156339	0.435819	374.924	-0.408458	0.121489	-3.36209	0.000773561	0.0160283
ENSDARG00000003008	12	25640480	25770232	prkcea	protein kinase C, epsilon a	.	The process of introducing a phosphate group on to a protein. [GOC:hb];"The living contents of a cell; the matter contained within (but not including) the plasma membrane, usually taken to exclude large vacuoles and masses of secretory or ingested material. In eukaryotes it includes the nucleus and cytoplasm." [ISBN:0198506732];"Interacting selectively and non-covalently with ATP, adenosine 5'-tr…	39	102	1199	1269	1348	996	985	1172	1355	1363	1316	-1.38702	1210.28	-0.147738	0.0602734	-2.45113	0.0142407	0.0928892	1151.51	-0.18037	0.0973521	-1.85276	0.0639165	0.250661	1303.9	-0.110091	0.0892553	-1.23343	0.217414	0.659272
ENSDARG00000025495	9	32978302	32981660	nhlh2	nescient helix loop helix 2	.	Interacting selectively and non-covalently with a specific sequence of DNA that is part of a regulatory region that controls the transcription of a gene or cistron by RNA polymerase II. [GOC:txnOH];"A membrane-bounded organelle of eukaryotic cells in which chromosomes are housed and replicated. In most cells, the nucleus contains all of the cell's chromosomes except the organellar chromosomes, an…	6	23	482	492	527	387	378	474	477	492	454	-1.9386	459.632	-0.225706	0.0806195	-2.79965	0.00511584	0.0446704	452.604	-0.18117	0.118718	-1.52605	0.126997	0.388169	487.614	-0.254439	0.108416	-2.34687	0.0189318	0.172203
ENSDARG00000104945	14	50770537	50804016	sncb	synuclein, beta	larval locomotory behavior decreased occurrence	The process in which a neuroblast acquires the specialized structural and functional features of a dopaminergic neuron, a neuron that secretes dopamine. [GOC:rph];"All of the contents of a cell excluding the plasma membrane and nucleus, but including other subcellular structures." [ISBN:0198547684];"Locomotory behavior in a larval (immature) organism." [GOC:ai]	3	107	1972	2092	2302	1642	1730	1869	2207	2304	2130	-5.1565	2008.88	-0.157749	0.0613012	-2.57334	0.0100721	0.0731001	1919.04	-0.181496	0.0944082	-1.92246	0.0545473	0.225714	2160.41	-0.127802	0.0856502	-1.49214	0.135661	0.537818
ENSDARG00000029242	7	38703338	38714562	fbxo3	F-box protein 3	.	The actions of a single gene product or complex at the molecular level consisting of a single biochemical activity or multiple causally linked biochemical activities. A given gene product may exhibit one or more molecular functions. [GOC:go_curators];"The part of a cell, extracellular environment or virus in which a gene product is located. A gene product may be located in one or more parts of a …	9	32	433	436	484	379	370	359	437	434	405	-1.83007	413.334	-0.230518	0.0859079	-2.68332	0.0072896	0.0577185	407.571	-0.183681	0.124619	-1.47394	0.140499	0.411763	438.324	-0.260182	0.110798	-2.34826	0.0188615	0.171937
ENSDARG00000004988	21	28958471	29075815	ppp3ca	protein phosphatase 3, catalytic subunit, alpha isozyme	.	Catalysis of the reaction: a phosphoprotein + H2O = a protein + phosphate. Together with protein kinases, these enzymes control the state of phosphorylation of cell proteins and thereby provide an important mechanism for regulating cellular activity. [EC:3.1.3.16, ISBN:0198547684];"The process of removing one or more phosphoric residues from a protein." [GOC:hb];"Catalysis of the hydrolysis of va…	8	115	1649	1827	1945	1337	1418	1704	1905	1948	1693	-3.84549	1697.42	-0.17323	0.0714859	-2.42328	0.0153812	0.0976982	1631.18	-0.185334	0.100646	-1.84144	0.0655565	0.254735	1822	-0.154599	0.0899183	-1.71933	0.0855537	0.42709
ENSDARG00000006497	13	31424586	31470439	rtn1a	reticulon 1a	.	A lipid bilayer along with all the proteins and protein complexes embedded in it an attached to it. [GOC:dos, GOC:mah, ISBN:0815316194];"The component of a membrane consisting of the gene products and protein complexes having at least some part of their peptide sequence embedded in the hydrophobic region of the membrane." [GOC:dos, GOC:go_curators];"The actions of a single gene product or complex…	33	437	4520	4424	4913	3743	3715	3889	5087	4939	4485	-3.7271	4373.51	-0.160933	0.062608	-2.57048	0.0101558	0.0735223	4171.99	-0.190537	0.0910032	-2.09374	0.0362832	0.171451	4713.61	-0.125799	0.0849698	-1.48052	0.138736	0.543339
ENSDARG00000033201	20	9428965	9462449	zgc:101840	zgc:101840	.	Interacting selectively and non-covalently with any metal ion. [GOC:ai];"The part of a cell, extracellular environment or virus in which a gene product is located. A gene product may be located in one or more parts of a cell and its location may be as specific as a particular macromolecular complex, that is, a stable, persistent association of macromolecules that function together." [GOC:go_curat…	1	21	269	260	311	228	221	229	287	256	253	-4.39232	255.544	-0.235596	0.0955071	-2.46679	0.0136332	0.0900032	251.039	-0.202	0.13916	-1.45156	0.146623	0.421109	272.538	-0.246338	0.127068	-1.93863	0.0525468	0.32394
ENSDARG00000099849	14	35013656	35246931	ebf3a	early B cell factor 1a	.	The biological process whose specific outcome is the progression of a multicellular organism over time from an initial condition (e.g. a zygote or a young adult) to a later condition (e.g. a multicellular animal or an aged adult). [GOC:dph, GOC:ems, GOC:isa_complete, GOC:tb];"Interacting selectively and non-covalently with a specific DNA sequence (sometimes referred to as a motif) within the regu…	43	131	885	1003	1044	801	727	851	996	1047	939	-1.60716	912.759	-0.186899	0.0629368	-2.96963	0.00298163	0.0301601	876.974	-0.203561	0.100039	-2.03482	0.0418694	0.188609	982.946	-0.160985	0.0959785	-1.67731	0.0934824	0.447644
ENSDARG00000103802	6	24152816	24203980	si:ch73-389b16.2	si:ch73-389b16.2	.	.	24	104	1082	1063	1249	881	795	1086	1101	1129	965	-2.11548	1030.89	-0.240328	0.081372	-2.95344	0.0031425	0.0313119	1014.94	-0.203709	0.10814	-1.88375	0.0595991	0.239517	1097.94	-0.266868	0.098602	-2.70652	0.00679927	0.0848815
ENSDARG00000063371	1	357518	411331	rasa3	RAS p21 protein activator 3	thrombocyte decreased amount;thrombocyte differentiation disrupted;hemoglobin complex part_of nucleate erythrocyte decreased amount;nucleate erythrocyte differentiation disrupted	The component of a plasma membrane consisting of gene products and protein complexes that have some covalently attached part (e.g. peptide sequence or GPI anchor) which is embedded in the cytoplasmic side of the plasma membrane only. [GOC:dos, GOC:mah];"All of the contents of a cell excluding the plasma membrane and nucleus, but including other subcellular structures." [ISBN:0198547684];"Any proc…	22	86	712	812	888	656	559	739	844	841	742	-1.96683	746.722	-0.194894	0.0733707	-2.6563	0.00790041	0.0613029	719.408	-0.206437	0.109076	-1.8926	0.0584106	0.236432	803.786	-0.173757	0.100534	-1.72834	0.0839273	0.422572
ENSDARG00000033599	19	26714949	26730250	zgc:100906	zgc:100906	.	Any process that results in a change in state or activity of a cell (in terms of movement, secretion, enzyme production, gene expression, etc.) as a result of a stress acting at the endoplasmic reticulum. ER stress usually results from the accumulation of unfolded or misfolded proteins in the ER lumen. [GOC:cjm, GOC:mah];"The external part of the cell wall and/or plasma membrane." [GOC:jl, GOC:mt…	2	15	353	312	351	291	233	299	292	312	282	-2.90689	301.862	-0.291663	0.106375	-2.74184	0.00610958	0.0503459	304.017	-0.206663	0.137581	-1.50212	0.133065	0.398729	318.51	-0.358193	0.125852	-2.84614	0.00442528	0.062508
ENSDARG00000009480	16	51950510	51966846	pdcl	phosducin-like	.	.	59	127	1666	1723	1932	1375	1407	1518	1819	1852	1563	-1.10604	1637.71	-0.21322	0.0668121	-3.19135	0.00141611	0.0171469	1590.35	-0.20777	0.0947029	-2.19392	0.0282413	0.143225	1755.99	-0.208653	0.0929939	-2.24372	0.0248502	0.205026
ENSDARG00000030265	13	30007554	30028103	scdb	stearoyl-CoA desaturase b	.	The component of a membrane consisting of the gene products and protein complexes having at least some part of their peptide sequence embedded in the hydrophobic region of the membrane. [GOC:dos, GOC:go_curators];"The chemical reactions and pathways resulting in the formation of monounsaturated fatty acid." [GO_REF:0000068, GOC:hjd, GOC:TermGenie, PMID:16443825];"The chemical reactions and pathwa…	4	28	1396	1349	1550	1116	1087	1276	1538	1507	1429	-2.80735	1347.37	-0.172351	0.0632985	-2.72284	0.00647242	0.0527163	1284.53	-0.20805	0.0980825	-2.12117	0.0339072	0.163385	1457.22	-0.130854	0.0911376	-1.43578	0.151065	0.561575
ENSDARG00000092659	13	1100197	1120773	ppp3r1a	protein phosphatase 3, regulatory subunit B, alpha a	.	Interacting selectively and non-covalently with calcium ions (Ca2+). [GOC:ai]	27	82	1054	1156	1299	894	936	999	1220	1230	1136	-1.60266	1092.2	-0.185159	0.0658049	-2.81376	0.00489651	0.0431936	1046.96	-0.208124	0.102039	-2.03966	0.0413845	0.187366	1178.31	-0.153928	0.0924909	-1.66425	0.0960624	0.453326
ENSDARG00000009553	21	26697536	26707052	gng3	guanine nucleotide binding protein (G protein), gamma 3	.	A lipid bilayer along with all the proteins and protein complexes embedded in it an attached to it. [GOC:dos, GOC:mah, ISBN:0815316194];"The cellular process in which a signal is conveyed to trigger a change in the activity or state of a cell. Signal transduction begins with reception of a signal (e.g. a ligand binding to a receptor or receptor activation by a stimulus such as light), or for sign…	3	52	1556	1615	1753	1355	1223	1408	1712	1712	1670	-4.11548	1541.17	-0.177689	0.0542252	-3.27688	0.00104961	0.0136571	1472.31	-0.208595	0.0920181	-2.26689	0.0233969	0.124823	1665.21	-0.140152	0.0865828	-1.6187	0.105511	0.476655
ENSDARG00000070809	19	21698149	21766461	znf516	zinc finger protein 516	.	The synthesis of RNA from a DNA template by RNA polymerase II, originating at an RNA polymerase II promoter. Includes transcription of messenger RNA (mRNA) and certain small nuclear RNAs (snRNAs). [GOC:jl, GOC:txnOH, ISBN:0321000382];"The cellular process in which a signal is conveyed to trigger a change in the activity or state of a cell. Signal transduction begins with reception of a signal (e.…	39	89	1079	1221	1389	986	945	1042	1243	1301	1235	-1.19033	1148.46	-0.18269	0.0648554	-2.81688	0.0048492	0.0428688	1099.45	-0.208643	0.100014	-2.08615	0.0369653	0.173463	1239.82	-0.148371	0.0945784	-1.56876	0.116704	0.499911
ENSDARG00000062880	23	11669109	11861393	cntn3a.1	contactin 3a, tandem duplicate 1	.	.	4	26	344	363	412	299	262	342	358	362	377	-2.70044	343.45	-0.214484	0.0849157	-2.52585	0.0115419	0.0804009	333.36	-0.209404	0.127271	-1.64534	0.0999002	0.335557	368.838	-0.203656	0.116719	-1.74483	0.0810144	0.414228
ENSDARG00000043077	22	10361170	10397680	nisch	nischarin	.	Interacting selectively and non-covalently with an integrin. [GOC:ceb];"Interacting selectively and non-covalently with any inositol-containing glycerophospholipid, i.e. phosphatidylinositol (PtdIns) and its phosphorylated derivatives." [GOC:bf, ISBN:0198506732, PMID:11395417]	37	75	784	880	887	676	618	760	827	791	784	-1.01937	773.202	-0.249584	0.0646532	-3.86035	0.000113225	0.00236927	760.266	-0.216409	0.103979	-2.08127	0.0374088	0.174853	825.799	-0.267071	0.0969137	-2.75576	0.00585558	0.076473
ENSDARG00000053122	20	40269891	40319890	clvs2	clavesin 2	.	The lipid bilayer surrounding an early endosome. [GOC:pz];"The network of interconnected tubular and cisternal structures located within the Golgi apparatus on the side distal to the endoplasmic reticulum, from which secretory vesicles emerge. The trans-Golgi network is important in the later stages of protein secretion where it is thought to play a key role in the sorting and targeting of secret…	5	29	438	468	511	361	371	403	449	467	449	-2.53605	432.18	-0.232672	0.0766083	-3.03717	0.00238813	0.0255441	421.722	-0.21708	0.118808	-1.82714	0.0676784	0.260656	463.385	-0.230687	0.109199	-2.11253	0.0346411	0.25444
ENSDARG00000018726	18	25073984	25177230	slco3a1	solute carrier organic anion transporter family, member 3A1	.	The membrane surrounding a cell that separates the cell from its external environment. It consists of a phospholipid bilayer and associated proteins. [ISBN:0716731363];"The process in which a solute is transported across a lipid bilayer, from one side of a membrane to the other." [GOC:dph, GOC:jid];"The directed movement of prostaglandins into, out of or within a cell, or between cells, by means …	1	44	360	420	411	306	320	322	414	387	389	-5.45943	366.974	-0.208737	0.0852921	-2.44732	0.0143922	0.0934769	353.856	-0.222669	0.128191	-1.73701	0.0823848	0.29838	396.126	-0.181356	0.114503	-1.58385	0.113227	0.492399
ENSDARG00000030107	20	21638397	21806170	si:ch211-207i1.2	.	.	The double lipid bilayer enclosing the nucleus and separating its contents from the rest of the cytoplasm; includes the intermembrane space, a gap of width 20-40 nm (also called the perinuclear space). [ISBN:0198547684];"The process in which cytoskeletal filaments are directly or indirectly linked to the nuclear membrane." [GOC:tb];"Interacting selectively and non-covalently with monomeric or mul…	65	137	2524	3111	3314	2355	2176	2613	2834	2823	2670	-1.07566	2692.21	-0.259097	0.0633074	-4.09269	4.26398e-05	0.00106592	2652.38	-0.224583	0.0951538	-2.36021	0.0182645	0.104517	2876.13	-0.281248	0.0902163	-3.11749	0.00182401	0.0310898
ENSDARG00000102975	21	41256771	41305748	nsg2	neuronal vesicle trafficking associated 2	.	A vacuole to which materials ingested by endocytosis are delivered. [ISBN:0198506732, PMID:19696797];"Interacting selectively and non-covalently with a clathrin light chain." [GOC:mah];"The process that results in the assembly of clathrin triskelia into the ordered structure known as a clathrin cage." [GOC:jid, PMID:11460887, PMID:11977118, PMID:9531549];"The component of a membrane consisting of…	1	90	1427	1286	1504	1083	1073	1219	1522	1381	1334	-6.49185	1303.34	-0.207411	0.0725681	-2.85816	0.00426105	0.0389616	1255.56	-0.224644	0.104164	-2.15663	0.0310344	0.153775	1407.2	-0.181044	0.0983977	-1.83992	0.0657798	0.368043
ENSDARG00000016868	5	43427841	43502675	rhobtb2a	Rho-related BTB domain containing 2a	.	The living contents of a cell; the matter contained within (but not including) the plasma membrane, usually taken to exclude large vacuoles and masses of secretory or ingested material. In eukaryotes it includes the nucleus and cytoplasm. [ISBN:0198506732];"Any series of molecular signals in which a small monomeric GTPase relays one or more of the signals." [GOC:mah];"Interacting selectively and …	9	70	361	398	425	312	301	328	427	407	355	-2.95936	364.797	-0.206798	0.0839357	-2.46377	0.0137485	0.0905652	351.064	-0.22695	0.123485	-1.83787	0.0660815	0.25601	394.388	-0.174438	0.115954	-1.50437	0.132486	0.531592
ENSDARG00000056228	2	25560556	25632090	pld1a	phospholipase D1a	angiogenesis disrupted;filopodium part_of intersegmental vessel decreased length;nucleate erythrocyte differentiation disrupted;vasculogenesis disrupted;cerebellar central artery disorganized;hemoglobin complex part_of nucleate erythrocyte decreased amount;intersegmental vessel irregular spatial pattern;inner optic circle decreased amount;axon part_of primary motor neuron branched;cell junction p…	Catalysis of the release of N-acylethanolamine from N-acyl-phosphatidylethanolamine (NAPE) to generate N-acylethanolamine (NAE). [GOC:elh, PMID:14634025, PMID:15878693];"A series of molecular signals in which a cell uses an inositol-containing lipid to convert a signal into a response. Inositol lipids include the phosphoinositides (phosphatidylinositol and its phosphorylated derivatives), ceramid…	21	56	701	792	778	664	514	634	775	682	739	-1.41504	692.168	-0.234647	0.0802607	-2.92356	0.00346052	0.0334491	674.183	-0.22792	0.114271	-1.99455	0.0460924	0.201179	744.288	-0.229553	0.102621	-2.2369	0.0252928	0.207371
ENSDARG00000074581	5	13781968	13835556	add2	adducin 2 (beta)	.	Any of the various filamentous elements that form the internal framework of cells, and typically remain after treatment of the cells with mild detergent to remove membrane constituents and soluble components of the cytoplasm. The term embraces intermediate filaments, microfilaments, microtubules, the microtrabecular lattice, and other structures characterized by a polymeric filamentous nature and…	1	112	659	772	890	574	614	646	825	774	661	-6.80735	706.121	-0.228401	0.0870823	-2.62281	0.00872071	0.0658236	685.456	-0.231216	0.11519	-2.00725	0.0447232	0.197296	760.731	-0.21433	0.109316	-1.96065	0.0499195	0.314575
ENSDARG00000014068	1	54707667	54718863	pgam1b	phosphoglycerate mutase 1b	.	Catalysis of the geometric or structural changes within one molecule. Isomerase is the systematic name for any enzyme of EC class 5. [ISBN:0198506732];"Catalysis of the reaction: 2-phospho-D-glycerate = 3-phospho-D-glycerate." [EC:5.4.2.1];"Any process that modulates the frequency, rate or extent of the pentose-phosphate shunt, the process in which glucose is oxidized, coupled to NADPH synthesis.…	9	204	1401	1474	1662	1198	1205	1184	1578	1581	1412	-4.5025	1398.35	-0.20829	0.0707008	-2.94607	0.00321837	0.0317562	1343.45	-0.233922	0.101828	-2.29722	0.021606	0.1181	1513.82	-0.175306	0.0904006	-1.93921	0.0524753	0.323696
ENSDARG00000101020	KN149702.1	22079	92089	KHDRBS3	.	.	Interacting selectively and non-covalently with an RNA molecule or a portion thereof. [GOC:jl, GOC:mah]	4	16	258	283	297	218	215	228	263	263	243	-2	250.604	-0.275124	0.0918926	-2.99397	0.00275371	0.0284759	247.762	-0.234547	0.137025	-1.71171	0.0869502	0.308713	268.078	-0.288912	0.125249	-2.30671	0.0210713	0.184895
ENSDARG00000007244	7	39360797	39371386	acp2	.	.	.	4	28	538	501	553	393	410	456	586	515	494	-2.80735	489.896	-0.215259	0.0857428	-2.51052	0.0120555	0.0827422	471.679	-0.238365	0.120994	-1.97006	0.0488319	0.209325	530.626	-0.182056	0.112114	-1.62385	0.104407	0.473963
ENSDARG00000102047	15	33070939	33073200	mab21l1	mab-21-like 1	.	Catalysis of the transfer of a nucleotidyl group to a reactant. [ISBN:0198506732];"The biological process whose specific outcome is the progression of a multicellular organism over time from an initial condition (e.g. a zygote or a young adult) to a later condition (e.g. a multicellular animal or an aged adult)." [GOC:dph, GOC:ems, GOC:isa_complete, GOC:tb];"A membrane-bounded organelle of eukary…	17	133	1652	1804	1978	1300	1435	1552	1598	1823	1629	-2.96782	1630.99	-0.266592	0.0768877	-3.46729	0.000525726	0.00802438	1605.58	-0.239783	0.100587	-2.38384	0.017133	0.100074	1747.93	-0.283598	0.0937474	-3.02513	0.00248523	0.0394997
ENSDARG00000032865	23	3653386	3703569	pacsin1a	protein kinase C and casein kinase substrate in neurons 1a	.	The process in which the anatomical structures of a neuron projection are generated and organized. A neuron projection is any process extending from a neural cell, such as axons or dendrites. [GOC:mah];"A vacuole to which materials ingested by endocytosis are delivered." [ISBN:0198506732, PMID:19696797];"Any process that modulates the frequency, rate or extent of endocytosis." [GOC:go_curators]	1	204	3498	3615	3939	2795	2739	3223	4027	3955	3705	-7.67243	3460.19	-0.176508	0.0628204	-2.80973	0.00495836	0.0434734	3271.33	-0.240238	0.0868706	-2.76547	0.00568413	0.0439788	3776.05	-0.111188	0.0810412	-1.372	0.170065	0.592173
ENSDARG00000038900	2	26470070	26476150	acadm	acyl-CoA dehydrogenase medium chain	.	A fatty acid oxidation process that results in the complete oxidation of a long-chain fatty acid. Fatty acid beta-oxidation begins with the addition of coenzyme A to a fatty acid, and occurs by successive cycles of reactions during each of which the fatty acid is shortened by a two-carbon fragment removed as acetyl coenzyme A; the cycle continues until only two or three carbons remain (as acetyl-…	9	93	2150	1769	1962	1685	1448	1519	2026	1778	1919	-3.36923	1796.53	-0.236951	0.0968674	-2.44614	0.0144395	0.0936986	1746.55	-0.240446	0.120304	-1.99866	0.0456453	0.200082	1937.91	-0.225106	0.10898	-2.06557	0.038869	0.270687
ENSDARG00000010934	13	31844011	31888487	syt14a	.	.	The membrane surrounding a cell that separates the cell from its external environment. It consists of a phospholipid bilayer and associated proteins. [ISBN:0716731363];"Interacting selectively and non-covalently with a clathrin heavy or light chain, the main components of the coat of coated vesicles and coated pits, and which also occurs in synaptic vesicles." [GOC:jl, GOC:mah, ISBN:0198506732];"…	4	19	221	236	252	194	155	208	237	220	214	-2.24793	213.386	-0.256325	0.0986379	-2.59864	0.00935925	0.0692859	208.718	-0.24345	0.146417	-1.66272	0.096369	0.327761	229.974	-0.246474	0.130575	-1.88761	0.0590783	0.34588
ENSDARG00000026028	9	32109911	32158288	ankrd44	ankyrin repeat domain 44	.	.	14	40	240	286	292	189	212	239	264	267	238	-1.51457	245.551	-0.260988	0.0990541	-2.6348	0.00841857	0.0642251	240.621	-0.24429	0.143649	-1.7006	0.0890178	0.312812	264.326	-0.255293	0.127521	-2.00196	0.0452889	0.296772
ENSDARG00000011065	5	20931252	21030996	camk2b1	calcium/calmodulin-dependent protein kinase (CaM kinase) II beta 1	notochord posterior region kinked;calmodulin-dependent protein kinase activity decreased rate;hindbrain swollen	Interacting selectively and non-covalently with calmodulin, a calcium-binding protein with many roles, both in the calcium-bound and calcium-free states. [GOC:krc];"The process in which relatively unspecialized cells, e.g. embryonic or regenerative cells, acquire specialized structural and/or functional features that characterize the cells, tissues, or organs of the mature organism or some other …	51	267	2622	2793	3186	2079	2072	2637	3143	3061	2826	-2.38827	2679.52	-0.182111	0.0745986	-2.44122	0.0146379	0.0947264	2536.37	-0.244645	0.0974114	-2.51147	0.0120231	0.0770139	2925.52	-0.118642	0.0845615	-1.40303	0.160607	0.575998
ENSDARG00000020795	12	3022882	3042029	rac3b	Rac family small GTPase 3b	.	Any series of molecular signals in which a small monomeric GTPase relays one or more of the signals. [GOC:mah];"The living contents of a cell; the matter contained within (but not including) the plasma membrane, usually taken to exclude large vacuoles and masses of secretory or ingested material. In eukaryotes it includes the nucleus and cytoplasm." [ISBN:0198506732];"Interacting selectively and …	5	33	1607	1772	1928	1378	1394	1392	1834	1955	1587	-2.72247	1634.26	-0.208231	0.0791033	-2.6324	0.00847852	0.0645669	1565.52	-0.24518	0.0986633	-2.48502	0.0129544	0.0813208	1774.87	-0.166679	0.0960415	-1.73549	0.0826541	0.418829
ENSDARG00000074225	9	34433053	34482698	si:ch211-269e2.1	si:ch211-269e2.1	.	.	3	50	789	809	844	628	643	643	786	878	797	-4.05889	751.548	-0.214962	0.0797858	-2.69423	0.00705507	0.0562585	721.065	-0.248548	0.110101	-2.25745	0.0239799	0.127296	816.365	-0.174121	0.101654	-1.71287	0.086737	0.430459
ENSDARG00000020493	13	421231	430143	lgi1a	leucine-rich, glioma inactivated 1a	trunk decreased length;activation of cysteine-type endopeptidase activity involved in apoptotic process increased occurrence;anatomical axis part_of whole organism decreased size;regulation of transmission of nerve impulse decreased process quality;cell part_of brain decreased amount;ventricular system increased size;pericardium edematous;anterior-most region part_of head decreased size;post-vent…	The process whose specific outcome is the progression of the brain over time, from its formation to the mature structure. Brain development begins with patterning events in the neural tube and ends with the mature structure that is the center of thought and emotion. The brain is responsible for the coordination and control of bodily activities and the interpretation of information from the senses…	11	42	477	554	615	386	430	468	489	572	469	-1.93289	491.895	-0.269365	0.0939842	-2.86607	0.00415604	0.038297	483.36	-0.250282	0.122119	-2.0495	0.0404134	0.184614	528.906	-0.273762	0.115071	-2.37908	0.017356	0.161588
ENSDARG00000032849	19	34959967	34979837	ndrg1a	N-myc downstream regulated 1a	.	The change in morphology and behavior of a mast cell resulting from exposure to a cytokine, chemokine, soluble factor, or to (at least in mammals) an antigen which the mast cell has specifically bound via IgE bound to Fc-epsilonRI receptors. [GOC:mgi_curators, ISBN:0781735149];"The process in which the structure and material content of mature peripheral nervous system myelin is kept in a function…	16	139	2496	2747	3156	2025	2122	2413	2922	2882	2941	-3.11894	2603.32	-0.191814	0.0723104	-2.65265	0.00798617	0.0618783	2467.1	-0.254426	0.0958432	-2.6546	0.00794023	0.0565239	2845.39	-0.127488	0.0863178	-1.47696	0.139686	0.544601
ENSDARG00000042477	8	53120278	53142068	nr2c2	nuclear receptor subfamily 2, group C, member 2	.	A membrane-bounded organelle of eukaryotic cells in which chromosomes are housed and replicated. In most cells, the nucleus contains all of the cell's chromosomes except the organellar chromosomes, and is the site of RNA synthesis and processing. In some species, or in specialized cell types, RNA metabolism or DNA replication may be absent. [GOC:go_curators];"Interacting selectively and non-coval…	11	53	513	487	617	389	425	441	537	561	526	-2.26849	494.882	-0.219645	0.0888896	-2.47098	0.0134743	0.0892274	474.399	-0.257034	0.124646	-2.06211	0.0391969	0.180992	538.8	-0.173495	0.110906	-1.56435	0.117736	0.502064
ENSDARG00000004588	19	28786149	28789409	sox4a	SRY (sex determining region Y)-box 4a	.	The closure of the temporary ventral gap in the optic cup that contributes to its shaping. [GOC:dph];"A membrane-bounded organelle of eukaryotic cells in which chromosomes are housed and replicated. In most cells, the nucleus contains all of the cell's chromosomes except the organellar chromosomes, and is the site of RNA synthesis and processing. In some species, or in specialized cell types, RNA…	54	225	2579	2896	3297	2130	2220	2482	2734	3361	2615	-2.05889	2674.69	-0.224979	0.088975	-2.52856	0.0114532	0.0800711	2573.53	-0.257588	0.0951932	-2.70595	0.00681097	0.0504877	2905.21	-0.188833	0.104401	-1.80872	0.070494	0.382666
ENSDARG00000005891	4	11804675	11810799	cyb5r3	cytochrome b5 reductase 3	.	A metabolic process that results in the removal or addition of one or more electrons to or from a substance, with or without the concomitant removal or addition of a proton or protons. [GOC:dhl, GOC:ecd, GOC:jh2, GOC:jid, GOC:mlg, GOC:rph];"Catalysis of an oxidation-reduction (redox) reaction, a reversible chemical reaction in which the oxidation state of an atom or atoms within a molecule is alt…	4	20	399	403	455	333	284	362	397	436	346	-2.32193	376.368	-0.27049	0.0902371	-2.99755	0.00272162	0.0282262	368.783	-0.259501	0.123607	-2.0994	0.0357815	0.169647	406.035	-0.263888	0.119071	-2.21622	0.0266764	0.2146
ENSDARG00000045180	12	17100021	17116481	acta2	actin, alpha 2, smooth muscle, aorta	actin binding arrested;smooth muscle part_of intestine non-contractile;heart contraction increased frequency;peristalsis disrupted;artery increased diameter;vasodilation increased occurrence;blood circulation increased volume;intestine smooth muscle contraction arrested	The portion of a cell bearing surface projections such as axons, dendrites, cilia, or flagella that includes the nucleus, but excludes all cell projections. [GOC:go_curators];"The flow of blood through the body of an animal, enabling the transport of nutrients to the tissues and the removal of waste products." [GOC:mtg_heart, ISBN:0192800825];"The process in which the population of cells that mak…	2	72	1582	1582	1375	1237	1123	1176	1570	1493	1443	-5.16993	1389.14	-0.235374	0.0918733	-2.56194	0.010409	0.074882	1339.32	-0.262776	0.118997	-2.20827	0.0272257	0.139399	1510.03	-0.199961	0.107752	-1.85575	0.0634893	0.360951
ENSDARG00000042840	17	30976484	31082381	eml1	echinoderm microtubule associated protein like 1	retinal cone cell photosensitive;detection of light stimulus involved in visual perception occurs_in retinal cone cell increased process quality;cone photoresponse recovery process quality	Interacting selectively and non-covalently with microtubules, filaments composed of tubulin monomers. [GOC:krc];"The processes required for a cone photoreceptor to recover, following light activation, so that it can respond to a subsequent light stimulus. Cone recovery requires the shutoff of active participants in the phototransduction cascade, including the visual pigment and downstream signal …	18	77	861	869	888	717	603	720	927	910	840	-2.09686	807.016	-0.212606	0.074765	-2.84366	0.00445986	0.0404155	769.823	-0.263225	0.107602	-2.44628	0.0144341	0.0885279	881.203	-0.157159	0.0984869	-1.59573	0.110548	0.486934
ENSDARG00000059534	7	56777668	56793739	si:ch211-146m13.3	si:ch211-146m13.3	.	The component of a membrane consisting of the gene products and protein complexes having at least some part of their peptide sequence embedded in the hydrophobic region of the membrane. [GOC:dos, GOC:go_curators];"A lipid bilayer along with all the proteins and protein complexes embedded in it an attached to it." [GOC:dos, GOC:mah, ISBN:0815316194]	4	26	409	421	415	307	286	375	382	438	403	-2.70044	378.504	-0.240359	0.092555	-2.59693	0.0094061	0.0694963	365.396	-0.26496	0.127973	-2.07043	0.0384123	0.178294	411.62	-0.204486	0.118222	-1.72968	0.0836866	0.422204
ENSDARG00000017569	17	19607387	19626357	reep3a	.	.	Any process specifically pertinent to the functioning of integrated living units: cells, tissues, organs, and organisms. A process is a collection of molecular events with a defined beginning and end. [GOC:go_curators, GOC:isa_complete];"The component of a membrane consisting of the gene products and protein complexes having at least some part of their peptide sequence embedded in the hydrophobic…	2	15	858	730	837	687	515	685	886	743	715	-2.90689	733.41	-0.253206	0.101388	-2.4974	0.0125107	0.0848494	712.378	-0.266434	0.125709	-2.11944	0.0340531	0.163728	795.429	-0.231366	0.114491	-2.02083	0.0432978	0.289635
ENSDARG00000015184	3	38647987	38692920	mpp3a	membrane protein, palmitoylated 3a (MAGUK p55 subfamily member 3)	.	.	12	32	730	866	978	630	613	747	959	853	783	-1.41504	785.714	-0.220799	0.0837571	-2.63618	0.00838452	0.064059	751.463	-0.266975	0.110609	-2.41368	0.0157923	0.0947097	857.528	-0.168713	0.105801	-1.59462	0.110796	0.487253
ENSDARG00000020771	2	35240485	35474115	tnr	tenascin R (restrictin, janusin)	optic tract branchiness	Any process that modulates the frequency, rate or extent of neurogenesis, the origin and formation of neurons. [GOC:ai];"The chemotaxis process that directs the migration of an axon growth cone to a specific target site in response to a combination of attractive and repulsive cues." [ISBN:0878932437];"A layer consisting mainly of proteins (especially collagen) and glycosaminoglycans (mostly as pr…	12	130	1368	1510	1601	1121	1105	1247	1517	1524	1466	-3.43741	1370.68	-0.2258	0.058761	-3.84268	0.000121696	0.00250716	1312.78	-0.267171	0.0941317	-2.83826	0.00453596	0.0368064	1494.33	-0.177233	0.0877057	-2.02076	0.0433042	0.289635
ENSDARG00000019360	6	6779114	6796687	sec23b	Sec23 homolog B, COPII coat complex component	nucleate erythrocyte immature;ventral mandibular arch decreased size;erythroblast binucleate;whole organism lethal (sensu genetics)	The process whose specific outcome is the progression of an erythrocyte over time, from its formation to the mature structure. [GOC:devbiol];"The process in which the anatomical structures of the neurocranium are generated and organized during the embryonic phase. The neurocranium is the portion of the vertebrate skull surrounding the brain." [GOC:dsf, GOC:jid, PMID:16049113];"The evagination of …	44	164	3470	3386	3117	2357	2422	2983	3370	2901	3084	-1.89812	2992.71	-0.278618	0.0893251	-3.11914	0.00181379	0.0207039	2934.9	-0.270138	0.112011	-2.41171	0.0158777	0.09505	3231.86	-0.277559	0.102848	-2.69872	0.00696063	0.0862279
ENSDARG00000004621	1	38649141	38756904	gpm6ab	glycoprotein M6Ab	.	Any process that modulates the frequency, rate or extent of the assembly of a filopodium, a thin, stiff protrusion extended by the leading edge of a motile cell such as a crawling fibroblast or amoeba, or an axonal growth cone. [GOC:ai, GOC:dph, GOC:tb];"The component of a membrane consisting of the gene products and protein complexes having at least some part of their peptide sequence embedded i…	5	143	5524	5717	6550	4248	4475	5037	5847	6335	5475	-4.83794	5415.06	-0.236369	0.0689486	-3.42819	0.000607629	0.00899131	5207.58	-0.27054	0.0909643	-2.97413	0.00293817	0.0260255	5895.79	-0.196245	0.0865775	-2.26669	0.023409	0.197224
ENSDARG00000060149	13	43507383	43599939	ablim1a	actin binding LIM protein 1a	.	Interacting selectively and non-covalently with any metal ion. [GOC:ai];"A process that is carried out at the cellular level which results in the assembly, arrangement of constituent parts, or disassembly of cytoskeletal structures." [GOC:dph, GOC:jl, GOC:mah];"Interacting selectively and non-covalently with monomeric or multimeric forms of actin, including actin filaments." [GOC:clt];"The part o…	6	27	400	452	456	318	298	395	452	393	445	-2.16993	396.909	-0.239814	0.0890741	-2.6923	0.00709616	0.0565439	382.246	-0.270967	0.125294	-2.16265	0.0305682	0.152065	432.497	-0.198231	0.114698	-1.72828	0.0839387	0.422572
ENSDARG00000011141	17	36898874	36936856	dpysl5a	dihydropyrimidinase-like 5a	.	Interacting selectively and non-covalently with microtubules, filaments composed of tubulin monomers. [GOC:krc];"The process whose specific outcome is the progression of nervous tissue over time, from its formation to its mature state." [GOC:dgh];"All of the contents of a cell excluding the plasma membrane and nucleus, but including other subcellular structures." [ISBN:0198547684];"The chemotaxis…	22	70	1359	1643	1794	1164	1230	1294	1481	1766	1452	-1.66985	1450.81	-0.24149	0.0877827	-2.751	0.0059413	0.0494097	1399.42	-0.271255	0.104353	-2.59941	0.00933839	0.0637248	1578.19	-0.205822	0.104752	-1.96485	0.0494313	0.312933
ENSDARG00000018491	24	17334678	17341458	pdia4	protein disulfide isomerase family A, member 4	.	The volume enclosed by the membranes of the endoplasmic reticulum. [ISBN:0198547684];"Catalysis of the geometric or structural changes within one molecule. Isomerase is the systematic name for any enzyme of EC class 5." [ISBN:0198506732];"The process of assisting in the covalent and noncovalent assembly of single chain polypeptides or multisubunit complexes into the correct tertiary structure." […	6	30	936	941	875	725	710	687	968	961	859	-2.32193	845.036	-0.223976	0.0924312	-2.42316	0.015386	0.0976996	808.262	-0.272243	0.119605	-2.27619	0.0228347	0.122589	923.307	-0.171063	0.106014	-1.6136	0.106614	0.479363
ENSDARG00000033516	17	33232748	33289349	efr3ba	EFR3 homolog Ba (S. cerevisiae)	.	.	17	47	740	808	802	576	553	690	783	791	747	-1.46713	714.359	-0.242095	0.0706276	-3.42777	0.000608567	0.0089927	688.118	-0.272293	0.108747	-2.50392	0.0122826	0.0782237	777.961	-0.202459	0.098822	-2.04872	0.0404893	0.27727
ENSDARG00000023058	17	6793001	6810785	foxo3a	forkhead box O3A	head malformed;activation of cysteine-type endopeptidase activity involved in apoptotic process increased occurrence;brain V-shaped	Any process that modulates the occurrence or rate of cell death by apoptotic process in neurons. [GOC:go_curators, GOC:mtg_apoptosis];"Any process that modulates the frequency, rate or extent of cellular DNA-templated transcription." [GOC:go_curators, GOC:txnOH];"The cellular synthesis of RNA on a template of DNA." [GOC:jl, GOC:txnOH];"Any molecular function by which a gene product interacts sele…	62	205	2562	2902	3499	1951	2240	2696	2813	3102	2652	-1.72528	2685.32	-0.259151	0.0941909	-2.75133	0.00593529	0.0493982	2608.9	-0.273382	0.114996	-2.37732	0.0174391	0.101231	2914.15	-0.240568	0.0977812	-2.46027	0.0138833	0.139286
ENSDARG00000030547	23	17800717	17815253	rnd1a	Rho family GTPase 1a	.	Interacting selectively and non-covalently with a nucleotide, any compound consisting of a nucleoside that is esterified with (ortho)phosphate or an oligophosphate at any hydroxyl group on the ribose or deoxyribose. [GOC:mah, ISBN:0198547684];"Interacting selectively and non-covalently with GTP, guanosine triphosphate." [GOC:ai];"Catalysis of the reaction: GTP + H2O = GDP + phosphate." [ISBN:0198…	8	30	479	493	584	410	355	430	541	496	523	-1.90689	473.781	-0.230962	0.0797847	-2.89482	0.0037938	0.0359214	453.479	-0.277003	0.117708	-2.35331	0.018607	0.105817	517.946	-0.176388	0.108592	-1.62432	0.104308	0.473669
ENSDARG00000101062	20	52907397	52939501	fdft1	farnesyl-diphosphate farnesyltransferase 1	.	Catalysis of the reaction: 2 farnesyl diphosphate = diphosphate + presqualene diphosphate. [EC:2.5.1.21];"Catalysis of the reaction: presqualene diphosphate + NADPH = squalene + NADP+ + diphosphate." [EC:2.5.1.21];"The component of a membrane consisting of the gene products and protein complexes having at least some part of their peptide sequence embedded in the hydrophobic region of the membrane…	9	36	155	159	187	125	132	122	130	166	147	-2	146.381	-0.31383	0.124847	-2.51372	0.0119465	0.0823589	145.481	-0.278119	0.166384	-1.67154	0.0946145	0.324332	157.682	-0.315752	0.150861	-2.093	0.0363491	0.26074
ENSDARG00000035952	3	58430678	58455289	cdr2a	cerebellar degeneration-related protein 2a	.	.	13	29	170	213	209	164	148	136	180	174	179	-1.15754	173.847	-0.305514	0.115487	-2.64545	0.00815815	0.0628909	171.901	-0.278397	0.16285	-1.70953	0.0873521	0.309625	187.693	-0.302209	0.140403	-2.15244	0.0313631	0.238473
ENSDARG00000006546	6	31350101	31364551	ak4	adenylate kinase 4	.	Catalysis of the reaction: ATP + nucleoside diphosphate = ADP + nucleoside triphosphate. [EC:2.7.4.6];"Catalysis of the transfer of a phosphate group, usually from ATP, to a substrate molecule." [ISBN:0198506732];"Interacting selectively and non-covalently with a nucleotide, any compound consisting of a nucleoside that is esterified with (ortho)phosphate or an oligophosphate at any hydroxyl group…	5	21	617	589	672	470	445	527	688	573	621	-2.07039	572.261	-0.234248	0.0826581	-2.83394	0.00459775	0.0412113	548.214	-0.280856	0.11304	-2.48457	0.0129707	0.0813449	625.717	-0.180546	0.10887	-1.65837	0.0972434	0.456432
ENSDARG00000099221	21	41649336	41777754	ppp2r2bb	protein phosphatase 2, regulatory subunit B, beta b	.	Modulates the activity of a protein phosphatase, an enzyme which catalyzes of the removal of a phosphate group from a protein substrate molecule. [GOC:ai];"A protein complex that has protein serine/threonine phosphatase activity that is polycation-stimulated (PCS), being directly stimulated by protamine, polylysine, or histone H1; it constitutes a subclass of several enzymes activated by differen…	8	58	551	579	653	396	457	510	584	597	497	-2.85798	531.629	-0.278543	0.0898052	-3.10164	0.00192453	0.0215756	519.215	-0.281183	0.121832	-2.30795	0.0210021	0.115598	576.474	-0.263137	0.108568	-2.42372	0.0153625	0.149057
ENSDARG00000103791	19	48117388	48120285	nme2b.1	NME/NM23 nucleoside diphosphate kinase 2b, tandem duplicate 1	adherens junction part_of heart composition;intersegmental vessel malformed;brain vasculature malformed;cardiac muscle cell part_of heart decreased contractility;cAMP biosynthetic process decreased rate;subintestinal vein malformed;central artery malformed;parachordal vessel aplastic;angiogenesis disrupted;subintestinal vein absent;heart decreased functionality;GTP biosynthetic process decreased …	Any process that modulates the frequency, rate or extent of angiogenesis. [GOC:go_curators];"Catalysis of the transfer of a phosphate group, usually from ATP, to a substrate molecule." [ISBN:0198506732];"The chemical reactions and pathways resulting in the formation of GTP, guanosine triphosphate." [ISBN:0198506732];"Catalysis of the reaction: ATP + nucleoside diphosphate = ADP + nucleoside triph…	202	515	6117	6060	6312	4834	4761	4530	5862	5720	5489	-1.35022	5494.14	-0.297737	0.0722363	-4.12171	3.76068e-05	0.000962653	5401.87	-0.284974	0.101366	-2.81133	0.00493372	0.0394054	5939.47	-0.301493	0.083284	-3.62006	0.000294537	0.0072931
ENSDARG00000093768	13	4405282	4407074	prr18	proline rich 18	.	The part of a cell, extracellular environment or virus in which a gene product is located. A gene product may be located in one or more parts of a cell and its location may be as specific as a particular macromolecular complex, that is, a stable, persistent association of macromolecules that function together. [GOC:go_curators, NIF_Subcellular:sao-1337158144];"The actions of a single gene product…	6	65	498	557	627	408	447	420	517	567	494	-3.43741	500.274	-0.282341	0.0893811	-3.15885	0.00158395	0.018774	488.534	-0.285808	0.1238	-2.30862	0.0209645	0.115496	542.87	-0.264469	0.109403	-2.41739	0.0156322	0.150766
ENSDARG00000011370	17	15502964	15528597	fyna	FYN proto-oncogene, Src family tyrosine kinase a	.	The phosphorylation by a protein of one or more of its own tyrosine amino acid residues, or a tyrosine residue on an identical protein. [PMID:10037737, PMID:10068444, PMID:10940390];"A membrane-bounded organelle of eukaryotic cells in which chromosomes are housed and replicated. In most cells, the nucleus contains all of the cell's chromosomes except the organellar chromosomes, and is the site of…	8	83	1255	1233	1387	960	936	1072	1297	1301	1217	-3.37504	1173.48	-0.251631	0.0625151	-4.02513	5.69445e-05	0.00135365	1130.11	-0.285837	0.0982205	-2.91015	0.0036125	0.0306455	1280.5	-0.208221	0.0918652	-2.26659	0.023415	0.197224
ENSDARG00000060711	25	11034750	11088839	sv2bb	synaptic vesicle glycoprotein 2Bb	.	The vesicular release of classical neurotransmitter molecules from a presynapse, across a chemical synapse, the subsequent activation of neurotransmitter receptors at the postsynapse of a target cell (neuron, muscle, or secretory cell) and the effects of this activation on the postsynaptic membrane potential and ionic composition of the postsynaptic cytosol. This process encompasses both spontane…	3	55	1532	1558	1726	1147	1229	1303	1611	1581	1540	-4.1964	1457.01	-0.253007	0.0654638	-3.86484	0.000111161	0.00233295	1403.76	-0.286287	0.0996334	-2.87341	0.0040607	0.033717	1589.72	-0.211323	0.0873793	-2.41845	0.0155866	0.150395
ENSDARG00000040198	14	47000351	47391084	fstl5	follistatin-like 5	.	Interacting selectively and non-covalently with calcium ions (Ca2+). [GOC:ai]	2	178	2224	2408	2424	1649	1728	2025	2628	2416	2161	-6.47573	2161.05	-0.224705	0.0792996	-2.83362	0.00460246	0.0412113	2057.22	-0.288007	0.0969257	-2.97142	0.0029643	0.0261918	2370.93	-0.160169	0.0914641	-1.75117	0.0799167	0.410059
ENSDARG00000059939	20	8122693	8443425	dab1a	Dab, reelin signal transducer, homolog 1a (Drosophila)	.	.	6	90	236	288	330	231	182	232	230	245	271	-3.90689	247.575	-0.32897	0.109414	-3.00664	0.0026415	0.0275157	246.483	-0.290912	0.144819	-2.0088	0.0445579	0.196834	266.91	-0.340386	0.134406	-2.53252	0.0113245	0.121157
ENSDARG00000078078	7	60551133	60598313	lrfn4b	.	.	The component of a membrane consisting of the gene products and protein complexes having at least some part of their peptide sequence embedded in the hydrophobic region of the membrane. [GOC:dos, GOC:go_curators];"A layer consisting mainly of proteins (especially collagen) and glycosaminoglycans (mostly as proteoglycans) that forms a sheet underlying or overlying cells such as endothelial and epi…	1	22	584	544	601	398	434	483	533	596	550	-4.45943	520.774	-0.262328	0.0893266	-2.93673	0.00331695	0.0324587	503.297	-0.292042	0.121953	-2.39472	0.0166331	0.0979825	568.479	-0.222186	0.111112	-1.99965	0.0455378	0.297682
ENSDARG00000017154	23	9088191	9137648	cables2b	Cdk5 and Abl enzyme substrate 2b	.	Any process that modulates the rate or extent of progression through the cell cycle. [GOC:ai, GOC:dph, GOC:tb]	8	17	200	193	191	146	142	152	201	174	183	-1.08746	174.601	-0.274824	0.110267	-2.49235	0.0126902	0.0858479	169.522	-0.295235	0.157865	-1.87018	0.0614586	0.244097	190.685	-0.232314	0.14159	-1.64075	0.100849	0.465326
ENSDARG00000078902	1	31374751	31505144	rims1b	.	.	Interacting selectively and non-covalently with any metal ion. [GOC:ai];"The directed movement of proteins in a cell, including the movement of proteins between specific compartments or structures within a cell, such as organelles of a eukaryotic cell." [GOC:mah];"Interacting selectively and non-covalently with Rab protein, any member of the Rab subfamily of the Ras superfamily of monomeric GTPas…	11	60	401	509	510	353	335	385	466	484	454	-2.44746	428.368	-0.249535	0.085028	-2.93473	0.00333835	0.0326381	410.9	-0.295992	0.123274	-2.4011	0.0163461	0.0969147	469.463	-0.192713	0.113528	-1.69749	0.0896036	0.438146
ENSDARG00000039966	14	46456091	46617228	prom1a	prominin 1a	.	A lipid bilayer along with all the proteins and protein complexes embedded in it an attached to it. [GOC:dos, GOC:mah, ISBN:0815316194];"The component of a membrane consisting of the gene products and protein complexes having at least some part of their peptide sequence embedded in the hydrophobic region of the membrane." [GOC:dos, GOC:go_curators]	15	60	1268	1433	1542	1012	1007	1204	1427	1494	1362	-2	1290.67	-0.235429	0.0711393	-3.30941	0.000934936	0.0124287	1230.72	-0.296071	0.0981586	-3.01626	0.00255916	0.0233363	1416.96	-0.17126	0.0910349	-1.88126	0.059937	0.349009
ENSDARG00000073764	6	9471367	9529217	si:ch211-113j14.1	si:ch211-113j14.1	.	A metabolic process that results in the removal or addition of one or more electrons to or from a substance, with or without the concomitant removal or addition of a proton or protons. [GOC:dhl, GOC:ecd, GOC:jh2, GOC:jid, GOC:mlg, GOC:rph];"Catalysis of an oxidation-reduction (redox) reaction in which hydrogen or electrons are transferred from each of two donors, and molecular oxygen is reduced o…	5	44	565	475	649	393	413	469	393	571	494	-3.1375	489.196	-0.331891	0.125868	-2.63683	0.00836858	0.064059	489.159	-0.297527	0.130626	-2.27769	0.0227448	0.122383	526.575	-0.356974	0.137177	-2.60229	0.00926038	0.105853
ENSDARG00000007975	25	3058924	3066067	fth1b	ferritin, heavy polypeptide 1b	.	Any process involved in the maintenance of an internal steady state of iron ions at the level of a cell. [GOC:ai, GOC:mah];"Interacting selectively and non-covalently with iron (Fe) ions." [GOC:ai];"Interacting selectively and non-covalently with any metal ion." [GOC:ai];"The process of binding or confining iron ions in an intracellular area such that they are separated from other components of a…	5	12	428	367	451	309	320	309	428	428	355	-1.26303	374.345	-0.26318	0.104013	-2.53026	0.0113977	0.0798892	361.508	-0.297975	0.135862	-2.19321	0.0282923	0.143381	409.375	-0.217784	0.123343	-1.76568	0.0774496	0.403133
ENSDARG00000056831	13	12045475	12088835	gng2	guanine nucleotide binding protein (G protein), gamma 2	.	A lipid bilayer along with all the proteins and protein complexes embedded in it an attached to it. [GOC:dos, GOC:mah, ISBN:0815316194];"The cellular process in which a signal is conveyed to trigger a change in the activity or state of a cell. Signal transduction begins with reception of a signal (e.g. a ligand binding to a receptor or receptor activation by a stimulus such as light), or for sign…	17	58	506	513	531	388	363	424	484	570	409	-1.77052	461.76	-0.283288	0.099104	-2.85849	0.0042566	0.0389482	450.169	-0.298372	0.116832	-2.55387	0.0106534	0.0703939	502.604	-0.256298	0.122961	-2.08439	0.0371252	0.263716
ENSDARG00000101844	18	5490668	5497405	mibp2	muscle-specific beta 1 integrin binding protein 2	skeletal muscle cell increased length;muscle tendon junction part_of myotome U-shaped;muscle tendon junction part_of myotome morphology;muscle tendon junction part_of fast muscle cell increased amount;nuclear chromosome telomeric region part_of whole organism decreased length;somite decreased width;myoseptum broken;vertical myoseptum disorganized;muscle tendon junction part_of myotome decreased t…	The aggregation, arrangement, and bonding together of a set of components to form a cell-substrate adherens junction. [GOC:mah];"A series of molecular signals initiated by the binding of extracellular ligand to an integrin on the surface of a target cell, and ending with regulation of a downstream cellular process, e.g. transcription." [GOC:mah, GOC:signaling];"The aggregation, arrangement and bo…	311	645	8360	7827	8770	6570	5998	6367	9247	8074	7998	-1.05238	7615.92	-0.235697	0.0775496	-3.03931	0.00237122	0.0254206	7258.79	-0.299106	0.0940405	-3.18061	0.00146966	0.0148819	8365.82	-0.1703	0.0895521	-1.90168	0.0572124	0.339996
ENSDARG00000034668	19	8816657	8880688	celf3a	cugbp, Elav-like family member 3a	.	A membrane-bounded organelle of eukaryotic cells in which chromosomes are housed and replicated. In most cells, the nucleus contains all of the cell's chromosomes except the organellar chromosomes, and is the site of RNA synthesis and processing. In some species, or in specialized cell types, RNA metabolism or DNA replication may be absent. [GOC:go_curators];"Interacting selectively and non-coval…	52	163	974	1138	1108	752	850	825	934	1099	835	-1.64829	941.48	-0.322514	0.0988631	-3.26223	0.00110541	0.0142507	933.796	-0.299372	0.113283	-2.64269	0.008225	0.0579462	1016.71	-0.336965	0.110223	-3.05712	0.00223478	0.0365736
ENSDARG00000027394	7	32722227	32749591	si:ch211-150g13.3	si:ch211-150g13.3	.	The component of a membrane consisting of the gene products and protein complexes having at least some part of their peptide sequence embedded in the hydrophobic region of the membrane. [GOC:dos, GOC:go_curators];"A lipid bilayer along with all the proteins and protein complexes embedded in it an attached to it." [GOC:dos, GOC:mah, ISBN:0815316194]	3	49	616	722	841	528	487	628	686	781	713	-4.02975	658.534	-0.240287	0.0907922	-2.64655	0.00813163	0.0627318	628.479	-0.301582	0.116207	-2.59521	0.00945336	0.0642949	723.842	-0.175236	0.109334	-1.60277	0.108986	0.484721
ENSDARG00000005841	25	31238606	31248602	tnni2a.2	.	.	Muscle contraction of cardiac muscle tissue. [GOC:dph];"A complex of accessory proteins (typically troponin T, troponin I and troponin C) found associated with actin in muscle thin filaments; involved in calcium regulation of muscle contraction." [ISBN:0815316194];"A process in which force is generated within skeletal muscle tissue, resulting in a change in muscle geometry. Force generation invol…	1	24	555	486	493	394	349	418	457	475	489	-4.58496	454.985	-0.302273	0.0961637	-3.14332	0.00167044	0.0196139	446.081	-0.302815	0.130276	-2.32441	0.0201034	0.112067	494.735	-0.284174	0.121183	-2.34501	0.0190266	0.172765
ENSDARG00000014439	7	38962207	39157394	dgkza	diacylglycerol kinase, zeta a	.	The cellular process in which a signal is conveyed to trigger a change in the activity or state of a cell. Signal transduction begins with reception of a signal (e.g. a ligand binding to a receptor or receptor activation by a stimulus such as light), or for signal transduction in the absence of ligand, signal-withdrawal or the activity of a constitutively active receptor. Signal transduction ends…	40	81	1288	1399	1370	1037	848	1197	1441	1373	1371	-1.01792	1242.93	-0.223306	0.0853925	-2.61506	0.00892122	0.0668659	1176.76	-0.302969	0.1081	-2.80268	0.00506798	0.0402003	1370.97	-0.145288	0.0913458	-1.59053	0.111715	0.48948
ENSDARG00000021595	4	22365061	22419743	lhfpl3	LHFPL tetraspan subfamily member 3	.	The actions of a single gene product or complex at the molecular level consisting of a single biochemical activity or multiple causally linked biochemical activities. A given gene product may exhibit one or more molecular functions. [GOC:go_curators];"The component of a membrane consisting of the gene products and protein complexes having at least some part of their peptide sequence embedded in t…	2	23	1140	1229	1314	883	877	1021	1298	1214	1128	-3.52356	1111.1	-0.257268	0.0665158	-3.86777	0.000109834	0.00231651	1066.51	-0.305229	0.0977149	-3.12367	0.0017861	0.0173697	1218.24	-0.202512	0.0920818	-2.19926	0.0278596	0.220727
ENSDARG00000061918	14	25534604	25577094	cplx2	complexin 2	.	Interacting selectively and non-covalently with a syntaxin, a SNAP receptor involved in the docking of synaptic vesicles at the presynaptic zone of a synapse. [ISBN:0198506732];"The directed movement of a neurotransmitter into, out of or within a cell, or between cells, by means of some agent such as a transporter or pore. Neurotransmitters are any chemical substance that is capable of transmitti…	9	76	1690	1675	1812	1234	1276	1399	1688	1825	1604	-3.078	1564	-0.257345	0.0728151	-3.53423	0.00040897	0.00651754	1501.55	-0.305569	0.0976119	-3.13044	0.00174543	0.0170363	1714.65	-0.203412	0.0926505	-2.19548	0.0281292	0.22206
ENSDARG00000035650	17	30897292	30975978	evla	Enah/Vasp-like a	.	The formation of a protein homotetramer, a macromolecular structure consisting of four noncovalently associated identical subunits. [GOC:go_curators];"Any of the various filamentous elements that form the internal framework of cells, and typically remain after treatment of the cells with mild detergent to remove membrane constituents and soluble components of the cytoplasm. The term embraces inte…	15	78	283	320	418	248	225	289	353	300	341	-2.37851	304.609	-0.260608	0.107221	-2.43057	0.0150751	0.0966465	292.831	-0.306541	0.141937	-2.15969	0.0307963	0.152808	334.437	-0.203169	0.130183	-1.56064	0.118608	0.503328
ENSDARG00000003311	13	15182200	15226538	pank2	pantothenate kinase 2	nucleate erythrocyte spatial pattern;heart hemorrhagic;caudal vein plexus irregularly shaped;caudal vein plexus edematous;intersegmental vessel incomplete structure;trunk vasculature spatial pattern;fourth ventricle hydrocephalic;central nervous system disorganized;cell death occurs_in whole organism increased occurrence;hindbrain spatial pattern;anterior-posterior axis part_of whole organism dec…	The process of introducing a phosphate group into a molecule, usually with the formation of a phosphoric ester, a phosphoric anhydride or a phosphoric amide. [ISBN:0198506732];"The process whose specific outcome is the progression of the vasculature over time, from its formation to the mature structure. The vasculature is an interconnected tubular multi-tissue structure that contains fluid that i…	34	69	1273	1508	1582	1205	832	1254	1350	1451	1497	-1.02106	1312.13	-0.253581	0.100988	-2.51101	0.0120388	0.0826894	1258.32	-0.307134	0.120626	-2.54617	0.0108912	0.0716554	1441.04	-0.201063	0.097452	-2.0632	0.0390938	0.271579
ENSDARG00000102412	24	2933687	2972039	eci2	enoyl-CoA delta isomerase 2	.	Interacting selectively and non-covalently with acyl-CoA, any derivative of coenzyme A in which the sulfhydryl group is in thiolester linkage with a fatty acyl group. [GOC:jl, ISBN:0198506732];"Catalysis of a biochemical reaction at physiological temperatures. In biologically catalyzed reactions, the reactants are known as substrates, and the catalysts are naturally occurring macromolecular subst…	21	62	727	790	843	579	642	537	764	727	701	-1.56188	697.034	-0.300578	0.093781	-3.20511	0.0013501	0.0165259	681.731	-0.307584	0.126509	-2.43132	0.0150438	0.0912336	758.949	-0.285048	0.0976679	-2.91854	0.00351673	0.051989
ENSDARG00000061257	3	26331243	26342005	zgc:153240	zgc:153240	.	The part of a cell, extracellular environment or virus in which a gene product is located. A gene product may be located in one or more parts of a cell and its location may be as specific as a particular macromolecular complex, that is, a stable, persistent association of macromolecules that function together. [GOC:go_curators, NIF_Subcellular:sao-1337158144];"The actions of a single gene product…	7	21	407	456	492	329	306	383	459	459	435	-1.58496	409.231	-0.248397	0.0820126	-3.02877	0.00245551	0.0259975	390.94	-0.307879	0.121188	-2.54051	0.0110692	0.0725803	450.23	-0.182026	0.109731	-1.65884	0.0971471	0.456089
ENSDARG00000005861	17	41475606	41798856	ralgapa2	Ral GTPase activating protein, alpha subunit 2 (catalytic)	.	Any process that modulates the frequency, rate or extent of small GTPase mediated signal transduction. [GOC:go_curators];"Any process that initiates the activity of an inactive GTPase through the replacement of GDP by GTP." [GOC:dph, GOC:mah, GOC:tb];"All of the contents of a cell excluding the plasma membrane and nucleus, but including other subcellular structures." [ISBN:0198547684];"Any proces…	92	347	1663	1983	2150	1333	1341	1687	1917	2028	1871	-1.91523	1753.11	-0.24358	0.0808477	-3.01283	0.00258826	0.0270911	1671.78	-0.308261	0.103382	-2.98176	0.00286596	0.0255067	1928.97	-0.177165	0.0921096	-1.92341	0.0544282	0.330961
ENSDARG00000006257	10	15255012	15305767	vldlr	very low density lipoprotein receptor	.	A lipid bilayer along with all the proteins and protein complexes embedded in it an attached to it. [GOC:dos, GOC:mah, ISBN:0815316194];"Interacting selectively and non-covalently with calcium ions (Ca2+)." [GOC:ai];"The component of a membrane consisting of the gene products and protein complexes having at least some part of their peptide sequence embedded in the hydrophobic region of the membra…	16	104	426	526	542	357	380	378	459	531	454	-2.70044	446.247	-0.27011	0.0950216	-2.84261	0.00447453	0.0405312	430.617	-0.308464	0.125436	-2.45914	0.0139269	0.0860597	488.802	-0.221769	0.116055	-1.91089	0.0560182	0.336167
ENSDARG00000091756	20	48482925	48485354	insm1a	insulinoma-associated 1a	cell proliferation occurs_in posterior lateral line primordium disrupted;retinal bipolar neuron immature;anterior lateral line neuromast hair cell development disrupted;neuron maturation delayed;hair cell part_of neuromast decreased amount;cell cycle process temporally extended;retinal rod cell differentiation disrupted;retinal bipolar neuron decreased amount;retinal outer plexiform layer structu…	The cellular synthesis of RNA on a template of DNA. [GOC:jl, GOC:txnOH];"The process in which relatively unspecialized cells acquire specialized structural and/or functional features of a type B pancreatic cell. A type B pancreatic cell is a cell located towards center of the islets of Langerhans that secretes insulin." [CL:0000169, GOC:dph, PMID:11076772];"Any process that modulates the frequenc…	22	67	537	578	695	412	496	435	502	622	479	-1.60666	525.603	-0.325978	0.114105	-2.85682	0.00427915	0.0390768	520.939	-0.309566	0.132554	-2.33539	0.0195229	0.109614	569.207	-0.335064	0.11974	-2.79826	0.00513794	0.0695281
ENSDARG00000073704	21	32476709	32487084	si:dkeyp-72g9.4	si:dkeyp-72g9.4	.	.	1	59	696	709	820	517	547	605	828	744	662	-5.88264	673.329	-0.245128	0.0872722	-2.80878	0.00497297	0.0435298	642.582	-0.3096	0.111126	-2.78603	0.00533584	0.041925	740.926	-0.17783	0.105582	-1.68428	0.0921277	0.444369
ENSDARG00000058243	23	12232773	12345764	phactr3a	phosphatase and actin regulator 3a	.	The part of a cell, extracellular environment or virus in which a gene product is located. A gene product may be located in one or more parts of a cell and its location may be as specific as a particular macromolecular complex, that is, a stable, persistent association of macromolecules that function together. [GOC:go_curators, NIF_Subcellular:sao-1337158144];"Stops, prevents or reduces the activ…	2	29	192	226	279	135	177	201	205	231	198	-3.85798	202.916	-0.309102	0.127024	-2.43342	0.014957	0.0961593	198.998	-0.314372	0.166151	-1.89209	0.0584791	0.23653	221.464	-0.285918	0.139614	-2.04792	0.0405676	0.277535
ENSDARG00000076179	15	40074923	40133784	ngef	neuronal guanine nucleotide exchange factor	.	Any process that modulates the frequency, rate or extent of a molecular function, an elemental biological activity occurring at the molecular level, such as catalysis or binding. [GOC:isa_complete];"Stimulates the exchange of guanyl nucleotides associated with a GTPase of the Rho family. Under normal cellular physiological conditions, the concentration of GTP is higher than that of GDP, favoring …	26	63	723	619	783	545	482	563	679	565	609	-1.27684	615.322	-0.349161	0.0912718	-3.82551	0.000130504	0.00263731	613.348	-0.314985	0.119591	-2.63386	0.00844193	0.0590714	665.168	-0.36405	0.114814	-3.17078	0.00152028	0.0272428
ENSDARG00000044541	21	26996276	27010837	ppp1r14ba	protein phosphatase 1, regulatory (inhibitor) subunit 14Ba	.	All of the contents of a cell excluding the plasma membrane and nucleus, but including other subcellular structures. [ISBN:0198547684];"Innate immune responses are defense responses mediated by germline encoded components that directly recognize components of potential pathogens." [GO_REF:0000022, GOC:add, GOC:ebc, GOC:mtg_15nov05, GOC:mtg_sensu];"Any process that modulates the frequency, rate or…	1	26	393	394	460	302	299	328	306	424	299	-4.70044	354.845	-0.374803	0.117998	-3.17635	0.00149138	0.0178355	359.104	-0.316019	0.124345	-2.54147	0.0110386	0.0724266	381.017	-0.418506	0.13465	-3.1081	0.00188292	0.0319639
ENSDARG00000043081	6	49771372	49781362	ctsz	.	.	That part of a multicellular organism outside the cells proper, usually taken to be outside the plasma membranes, and occupied by fluid. [ISBN:0198547684];"Catalysis of the hydrolysis of internal, alpha-peptide bonds in a polypeptide chain by a mechanism in which the sulfhydryl group of a cysteine residue at the active center acts as a nucleophile." [GOC:mah, http://merops.sanger.ac.uk/about/glos…	7	30	897	873	933	646	694	677	936	764	863	-2.09954	803.796	-0.291425	0.0883603	-3.29815	0.000973248	0.012834	781.221	-0.316148	0.113417	-2.78748	0.00531202	0.0417686	878.592	-0.257184	0.105599	-2.43548	0.0148719	0.145578
ENSDARG00000100482	14	1431077	1454413	pmt	phosphoethanolamine methyltransferase	.	.	2	16	219	270	252	165	189	194	212	246	227	-3	217.83	-0.306136	0.109513	-2.79543	0.00518299	0.045109	212.922	-0.317084	0.150868	-2.10173	0.0355766	0.169018	237.966	-0.272836	0.135035	-2.02049	0.0433329	0.289642
ENSDARG00000018002	3	27770110	27777671	eci1	enoyl-CoA delta isomerase 1	.	A fatty acid oxidation process that results in the complete oxidation of a long-chain fatty acid. Fatty acid beta-oxidation begins with the addition of coenzyme A to a fatty acid, and occurs by successive cycles of reactions during each of which the fatty acid is shortened by a two-carbon fragment removed as acetyl coenzyme A; the cycle continues until only two or three carbons remain (as acetyl-…	3	16	278	319	327	215	258	204	243	287	288	-2.41504	267.829	-0.33267	0.121881	-2.72948	0.0063435	0.0518361	265.1	-0.321029	0.15308	-2.09714	0.0359815	0.170419	291.132	-0.330768	0.129223	-2.55966	0.0104773	0.114551
ENSDARG00000030656	1	45616067	45636362	sept3	septin 3	.	All of the contents of a cell excluding the plasma membrane and nucleus, but including other subcellular structures. [ISBN:0198547684];"The progression of biochemical and morphological phases and events that occur in a cell during successive cell replication or nuclear replication events. Canonically, the cell cycle comprises the replication and segregation of genetic material followed by the div…	9	50	977	974	1110	742	727	813	977	1000	943	-2.47393	910.19	-0.291588	0.0644084	-4.52717	5.97784e-06	0.00021187	881.928	-0.321494	0.101726	-3.16039	0.00157556	0.0157159	996.743	-0.249519	0.0949239	-2.62862	0.00857312	0.0998275
ENSDARG00000038881	8	2509625	2529878	acaa2	acetyl-CoA acyltransferase 2	.	A fatty acid oxidation process that results in the complete oxidation of a long-chain fatty acid. Fatty acid beta-oxidation begins with the addition of coenzyme A to a fatty acid, and occurs by successive cycles of reactions during each of which the fatty acid is shortened by a two-carbon fragment removed as acetyl coenzyme A; the cycle continues until only two or three carbons remain (as acetyl-…	14	95	294	308	316	211	247	218	264	307	286	-2.7625	270.824	-0.301946	0.108716	-2.77738	0.00547985	0.0468895	263.956	-0.322206	0.145535	-2.21394	0.0268332	0.138051	296.366	-0.266359	0.126111	-2.11209	0.0346786	0.254626
ENSDARG00000075713	15	2182103	2188422	shox2	short stature homeobox 2	heart decreased functionality;sinus venosus hypoplastic;heart contraction decreased rate;blood accumulation;myocardium part_of sinus venosus poorly differentiated;heart contraction decreased occurrence;blood circulation disrupted;pericardium edematous;regulation of heart contraction disrupted	The biological process whose specific outcome is the progression of a multicellular organism over time from an initial condition (e.g. a zygote or a young adult) to a later condition (e.g. a multicellular animal or an aged adult). [GOC:dph, GOC:ems, GOC:isa_complete, GOC:tb];"Any process that modulates the frequency, rate or extent of cellular DNA-templated transcription." [GOC:go_curators, GOC:t…	4	32	185	212	218	130	173	146	179	181	167	-3	176.162	-0.359619	0.122201	-2.94284	0.00325218	0.0320011	176.061	-0.322433	0.167002	-1.93071	0.0535188	0.222829	190.896	-0.367895	0.138105	-2.66389	0.00772433	0.091937
ENSDARG00000040321	2	55833425	55861351	rx2	retinal homeobox gene 2	cell death increased occurrence	The series of events required for an organism to receive a visual stimulus, convert it to a molecular signal, and recognize and characterize the signal. Visual stimuli are detected in the form of photons and are processed to form an image. [GOC:ai];"A membrane-bounded organelle of eukaryotic cells in which chromosomes are housed and replicated. In most cells, the nucleus contains all of the cell'…	11	24	174	225	244	141	154	177	209	200	187	-1.12553	188.161	-0.306386	0.110736	-2.7668	0.00566087	0.0479625	183.453	-0.322639	0.158115	-2.04054	0.0412971	0.187275	206.091	-0.264177	0.139114	-1.899	0.0575642	0.340879
ENSDARG00000099524	15	7384520	7598542	gbe1b	.	.	Interacting selectively and non-covalently with cations, charged atoms or groups of atoms with a net positive charge. [GOC:jl];"The chemical reactions and pathways resulting in the formation of glycogen, a polydisperse, highly branched glucan composed of chains of D-glucose residues." [ISBN:0198506732];"Catalysis of a biochemical reaction at physiological temperatures. In biologically catalyzed r…	8	37	479	552	594	412	395	394	408	505	478	-2.20945	466.472	-0.361438	0.0974884	-3.7075	0.000209317	0.00382456	466.46	-0.32399	0.120163	-2.69625	0.00701252	0.0516055	504.227	-0.380513	0.118247	-3.21795	0.00129112	0.0240413
ENSDARG00000087709	10	25108853	25204034	FAT3 (1 of many)	.	.	The membrane surrounding a cell that separates the cell from its external environment. It consists of a phospholipid bilayer and associated proteins. [ISBN:0716731363];"The attachment of a cell, either to another cell or to an underlying substrate such as the extracellular matrix, via cell adhesion molecules." [GOC:hb, GOC:pf];"Interacting selectively and non-covalently with calcium ions (Ca2+)."…	11	33	506	668	756	423	453	546	603	638	634	-1.58496	573.622	-0.270513	0.102665	-2.63491	0.00841592	0.0642251	550.793	-0.325482	0.130829	-2.48784	0.0128523	0.0808702	631.835	-0.209927	0.116539	-1.80134	0.0716488	0.385736
ENSDARG00000061450	2	27330461	27380161	tesk2	testis-specific kinase 2	.	All of the contents of a cell excluding the plasma membrane and nucleus, but including other subcellular structures. [ISBN:0198547684];"The process of introducing a phosphate group on to a protein." [GOC:hb];"Interacting selectively and non-covalently with ATP, adenosine 5'-triphosphate, a universally important coenzyme and enzyme regulator." [ISBN:0198506732];"Catalysis of the phosphorylation of…	12	47	512	524	593	351	402	452	540	506	476	-1.96963	479.86	-0.307414	0.0856638	-3.58861	0.000332444	0.00554672	467.577	-0.326854	0.123867	-2.63876	0.00832111	0.0584173	525.175	-0.273843	0.106939	-2.56073	0.0104453	0.114347
ENSDARG00000053929	12	26084882	26153101	opn4b	opsin 4b	.	Combining with an extracellular signal and transmitting the signal across the membrane by activating an associated G-protein; promotes the exchange of GDP for GTP on the alpha subunit of a heterotrimeric G-protein complex. [GOC:bf, http://www.iuphar-db.org, Wikipedia:GPCR];"Conveys a signal across a cell to trigger a change in cell function or state. A signal is a physical entity or change in sta…	2	16	168	152	194	110	109	158	138	123	135	-3	142.445	-0.425763	0.13341	-3.19138	0.00141596	0.0171469	146.559	-0.327826	0.172539	-1.90001	0.0574313	0.233962	152.701	-0.48779	0.150488	-3.24138	0.00118951	0.0226114
ENSDARG00000035715	19	29798064	29800812	marcksl1b	MARCKS-like 1b	.	Any process specifically pertinent to the functioning of integrated living units: cells, tissues, organs, and organisms. A process is a collection of molecular events with a defined beginning and end. [GOC:go_curators, GOC:isa_complete];"Interacting selectively and non-covalently with calmodulin, a calcium-binding protein with many roles, both in the calcium-bound and calcium-free states." [GOC:k…	472	972	6354	6655	7472	4745	5133	5262	6757	7428	5933	-1.04217	6132.63	-0.270632	0.0842292	-3.21304	0.00131339	0.0162685	5882	-0.3308	0.0932442	-3.54767	0.000388655	0.00509813	6754.08	-0.20996	0.092745	-2.26385	0.0235835	0.198325
ENSDARG00000098753	19	33887589	34063567	elmo1	engulfment and cell motility 1 (ced-12 homolog, C. elegans)	dorsal longitudinal anastomotic vessel malformed;parachordal vessel aplastic;angiogenesis disrupted;heart edematous;intersegmental vessel malformed;yolk accumulation;endothelial tip cell part_of intersegmental vessel increased width;blood vessel development disrupted;thoracic duct aplastic;ciliary basal body part_of pronephric tubule separated from GO:0016324;ciliary basal body organization occur…	Any process that activates or increases angiogenesis. [GOC:go_curators];"The assembly of a cilium, a specialized eukaryotic organelle that consists of a filiform extrusion of the cell surface. Each cilium is bounded by an extrusion of the cytoplasmic membrane, and contains a regular longitudinal array of microtubules, anchored basally in a centriole." [GOC:BHF, GOC:cilia, GOC:dph, GOC:kmv, GOC:pr…	39	152	1210	1286	1408	893	908	1093	1348	1442	1293	-1.96253	1193.39	-0.223426	0.0877065	-2.54743	0.010852	0.0768991	1120.71	-0.331324	0.100393	-3.30027	0.000965905	0.0106494	1326.52	-0.123577	0.0919877	-1.34341	0.179138	0.606549
ENSDARG00000007788	25	19609713	19666107	atp2b1b	ATPase plasma membrane Ca2+ transporting 1b	.	Organized structure of distinctive morphology and function, bounded by a single or double lipid bilayer membrane and occurring within the cell. Includes the nucleus, mitochondria, plastids, vacuoles, and vesicles. Excludes the plasma membrane. [GOC:go_curators];"Interacting selectively and non-covalently with ATP, adenosine 5'-triphosphate, a universally important coenzyme and enzyme regulator." …	3	56	796	1148	1081	638	745	831	801	1063	859	-4.22239	877.4	-0.323698	0.119297	-2.71338	0.00666	0.0537921	862.7	-0.334991	0.130551	-2.56598	0.0102886	0.0685562	958.174	-0.308096	0.125898	-2.44719	0.0143975	0.142837
ENSDARG00000056175	8	28527776	28534245	scrt2	scratch family zinc finger 2	regulation of cyclin-dependent protein serine/threonine kinase activity decreased process quality;regulation of neural precursor cell proliferation decreased process quality;re-entry into mitotic cell cycle increased occurrence;cell proliferation in hindbrain ventricular zone increased occurrence;primary neuron proliferative;whole organism opaque;nuclear chromosome telomeric region part_of whole …	Any process that modulates the frequency, rate or extent of the cascade of processes induced by the cell cycle regulator phosphoprotein p53, or an equivalent protein, in response to the detection of DNA damage. [GOC:jl];"Any process that modulates the frequency, rate or extent of neural precursor cell proliferation." [GOC:dph, GOC:yaf];"Interacting selectively and non-covalently with any nucleic …	14	46	204	217	250	135	177	175	224	226	160	-1.71621	194.871	-0.320487	0.1302	-2.4615	0.0138356	0.0909703	191.143	-0.336044	0.160035	-2.09982	0.0357446	0.169523	213.396	-0.289627	0.144011	-2.01114	0.0443108	0.293386
ENSDARG00000000241	9	41103127	41113878	slc40a1	solute carrier family 40 (iron-regulated transporter), member 1	hemoglobin biosynthetic process decreased occurrence;nucleate erythrocyte shape;nucleate erythrocyte low saturation;trunk decreased pigmentation;nucleate erythrocyte immature;dorsal longitudinal anastomotic vessel structure;blood quality;bone mineralization decreased occurrence;anatomical system quality;bone mineralization occurs_in vertebra decreased occurrence;embryonic hemopoiesis disrupted;bl…	A process in which an iron ion is transported from one side of a membrane to the other by means of some agent such as a transporter or pore. [GOC:mah];"The component of a membrane consisting of the gene products and protein complexes having at least some part of their peptide sequence embedded in the hydrophobic region of the membrane." [GOC:dos, GOC:go_curators];"Enables the transfer of iron (Fe…	38	92	1603	1671	1873	1196	1214	1369	1742	1837	1693	-1.27563	1558.75	-0.245669	0.080194	-3.06344	0.00218809	0.0239279	1472.31	-0.343699	0.0947858	-3.62606	0.000287775	0.00395988	1731.64	-0.152504	0.0884696	-1.7238	0.0847437	0.424997
ENSDARG00000037921	3	35589212	35602233	gng13b	guanine nucleotide binding protein (G protein), gamma 13b	.	Conveys a signal across a cell to trigger a change in cell function or state. A signal is a physical entity or change in state that is used to transfer information in order to trigger a response. [GOC:go_curators];"Any of a family of heterotrimeric GTP-binding and hydrolyzing proteins; they belong to a superfamily of GTPases that includes monomeric proteins such as EF-Tu and RAS. Heterotrimeric G…	2	45	533	562	668	420	424	441	610	635	537	-4.49185	530.269	-0.25405	0.0934105	-2.71972	0.00653381	0.0530744	502.667	-0.344612	0.117223	-2.9398	0.00328424	0.0284652	588.698	-0.165379	0.108949	-1.51796	0.129025	0.525298
ENSDARG00000057649	19	20453831	20482261	satb1a	SATB homeobox 1a	.	A membrane-bounded organelle of eukaryotic cells in which chromosomes are housed and replicated. In most cells, the nucleus contains all of the cell's chromosomes except the organellar chromosomes, and is the site of RNA synthesis and processing. In some species, or in specialized cell types, RNA metabolism or DNA replication may be absent. [GOC:go_curators];"Any molecular function by which a gen…	5	23	263	256	316	197	196	213	268	276	235	-2.20163	244.429	-0.315495	0.0988904	-3.19035	0.00142103	0.0171967	237.643	-0.34581	0.141483	-2.44418	0.014518	0.0889149	268.88	-0.264577	0.12922	-2.04749	0.0406101	0.277707
ENSDARG00000024619	19	15571290	15620967	foxo6b	forkhead box O6 b	.	Interacting selectively and non-covalently with a specific DNA sequence (sometimes referred to as a motif) within the regulatory region of a gene in order to modulate transcription. [GOC:curators, GOC:txnOH];"A membrane-bounded organelle of eukaryotic cells in which chromosomes are housed and replicated. In most cells, the nucleus contains all of the cell's chromosomes except the organellar chrom…	4	33	201	284	291	158	200	199	206	271	228	-3.04439	224.484	-0.321209	0.132519	-2.42387	0.0153563	0.0976833	219.536	-0.346342	0.161463	-2.14503	0.0319504	0.156786	246.624	-0.283279	0.144557	-1.95964	0.0500379	0.31467
ENSDARG00000004023	5	40728613	40734045	isl1	ISL LIM homeobox 1	spinal cord interneuron decreased amount;Kolmer-Agduhr neuron increased amount;peripheral nervous system neuron axonogenesis decreased occurrence;blood accumulation;Rohon-Beard neuron decreased amount;VeLD increased amount;neuron projection part_of CaP motoneuron morphology;atrial cardiac muscle cell differentiation disrupted;axon part_of secondary motor neuron decreased amount;axon part_of motor…	The biological process whose specific outcome is the progression of a multicellular organism over time from an initial condition (e.g. a zygote or a young adult) to a later condition (e.g. a multicellular animal or an aged adult). [GOC:dph, GOC:ems, GOC:isa_complete, GOC:tb];"The process in which a relatively unspecialized cell acquires specialized features of a cardiac muscle cell in the atrium.…	20	61	972	991	1011	675	731	769	986	1039	841	-1.60881	882.961	-0.294531	0.0878744	-3.35173	0.000803085	0.0110836	851.239	-0.347441	0.108924	-3.18977	0.00142387	0.0145285	973.592	-0.236574	0.103781	-2.27956	0.0226341	0.193447
ENSDARG00000026875	3	21044154	21062778	fam57ba	family with sequence similarity 57, member Ba	thigmotaxis decreased process quality;radial glial cell part_of hindbrain morphology;axon part_of forebrain disorganized;whole organism pigmented;midbrain shape;axon part_of hindbrain disorganized;whole organism movement quality;axon part_of hindbrain decreased length;somite U-shaped;central nervous system projection neuron axonogenesis disrupted;pigment cell decreased amount;forebrain decreased …	Generation of a long process of a CNS neuron, that carries efferent (outgoing) action potentials from the cell body towards target cells in a different central nervous system region. [GO_REF:0000021, GOC:cls, GOC:dgh, GOC:dph, GOC:jid, GOC:mtg_15jun06];"A lipid bilayer along with all the proteins and protein complexes embedded in it an attached to it." [GOC:dos, GOC:mah, ISBN:0815316194];"The act…	9	19	294	304	346	216	229	240	284	289	281	-1.078	273.903	-0.340698	0.0900897	-3.78177	0.000155719	0.00304311	268.839	-0.347553	0.135858	-2.55821	0.0105211	0.0696926	300.063	-0.308352	0.121831	-2.53097	0.0113747	0.121286
ENSDARG00000074697	21	13702566	13751535	npdc1a	neural proliferation, differentiation and control, 1a	.	A lipid bilayer along with all the proteins and protein complexes embedded in it an attached to it. [GOC:dos, GOC:mah, ISBN:0815316194];"The component of a membrane consisting of the gene products and protein complexes having at least some part of their peptide sequence embedded in the hydrophobic region of the membrane." [GOC:dos, GOC:go_curators]	3	23	367	416	416	273	279	321	384	374	407	-2.9386	356.12	-0.287406	0.0901783	-3.18709	0.00143714	0.0173131	341.793	-0.349123	0.126574	-2.75825	0.00581116	0.044738	393.886	-0.217053	0.116033	-1.87061	0.0613988	0.354418
ENSDARG00000102879	23	7762033	7826849	myt1b	.	.	Interacting selectively and non-covalently with a specific DNA sequence (sometimes referred to as a motif) within the regulatory region of a gene in order to modulate transcription. [GOC:curators, GOC:txnOH];"Any process that modulates the frequency, rate or extent of cellular DNA-templated transcription." [GOC:go_curators, GOC:txnOH];"Interacting selectively and non-covalently with zinc (Zn) ion…	66	241	381	516	521	303	360	360	435	528	388	-1.8685	416.993	-0.29244	0.12046	-2.4277	0.0151949	0.0971809	402.3	-0.349221	0.138088	-2.52897	0.0114397	0.0742274	460.365	-0.23403	0.129623	-1.80546	0.0710022	0.383757
ENSDARG00000018856	10	34737322	34871737	dclk1a	doublecortin-like kinase 1a	.	The process in which a signal is passed on to downstream components within the cell, which become activated themselves to further propagate the signal and finally trigger a change in the function or state of the cell. [GOC:bf, GOC:jl, GOC:signaling, ISBN:3527303782];"Catalysis of the transfer of a phosphate group, usually from ATP, to a substrate molecule." [ISBN:0198506732];"The process of intro…	7	46	347	420	452	302	259	323	427	417	408	-2.71621	367.553	-0.244653	0.097467	-2.51011	0.0120692	0.0827764	345.969	-0.35262	0.127993	-2.755	0.00586915	0.0450869	410.092	-0.141378	0.114642	-1.23321	0.217496	0.659272
ENSDARG00000013750	6	40661703	40669406	eno1b	enolase 1b, (alpha)	.	Catalysis of the reaction: 2-phospho-D-glycerate = phosphoenolpyruvate + H2O. [EC:4.2.1.11, ISBN:0198506732];"The chemical reactions and pathways resulting in the breakdown of a carbohydrate into pyruvate, with the concomitant production of a small amount of ATP and the reduction of NAD(P) to NAD(P)H. Glycolysis begins with the metabolism of a carbohydrate to generate products that can enter the …	1	35	852	1046	1056	722	652	777	1049	942	990	-5.12928	887.153	-0.260283	0.0843083	-3.08728	0.00202	0.0224387	840.85	-0.353085	0.105371	-3.35088	0.000805561	0.0092393	986.116	-0.169694	0.0994267	-1.70673	0.0878726	0.433397
ENSDARG00000054890	13	29446226	29455859	rgra	retinal G protein coupled receptor a	.	The component of a membrane consisting of the gene products and protein complexes having at least some part of their peptide sequence embedded in the hydrophobic region of the membrane. [GOC:dos, GOC:go_curators];"The sequence of reactions within a cell required to convert absorbed photons into a molecular signal." [GOC:go_curators];"The series of events required for an organism to receive a visu…	2	26	919	715	841	658	599	532	901	587	633	-3.70044	707.546	-0.364852	0.139064	-2.62363	0.00869973	0.0657118	707.298	-0.353092	0.142149	-2.48396	0.0129932	0.0814447	770.062	-0.377666	0.138496	-2.7269	0.00639324	0.0813924
ENSDARG00000052826	13	45092766	45225980	runx3	runt-related transcription factor 3	palatoquadrate cartilage aplastic;ceratobranchial cartilage aplastic;Rohon-Beard neuron increased amount;ceratohyal cartilage aplastic;glial cell part_of trigeminal ganglion increased amount;anterior region part_of neurocranium aplastic;chondrocyte differentiation delayed;axon part_of trigeminal ganglion decreased amount;trigeminal ganglion absent;chondrocranium decreased size;splanchnocranium ap…	The formation of bone or of a bony substance, or the conversion of fibrous tissue or of cartilage into bone or a bony substance. [GOC:mtg_mpo, PMID:17572649];"Interacting selectively and non-covalently with ATP, adenosine 5'-triphosphate, a universally important coenzyme and enzyme regulator." [ISBN:0198506732];"Any process that modulates the frequency, rate or extent of transcription from an RNA…	6	35	428	377	486	323	274	339	363	378	374	-2.54432	368.963	-0.375915	0.0923331	-4.07129	4.67526e-05	0.0011565	367.035	-0.355097	0.13126	-2.70529	0.00682448	0.0505352	402.386	-0.370499	0.120509	-3.07446	0.00210884	0.0348391
ENSDARG00000037935	3	32080403	32098515	aldh16a1	aldehyde dehydrogenase 16 family, member A1	.	A metabolic process that results in the removal or addition of one or more electrons to or from a substance, with or without the concomitant removal or addition of a proton or protons. [GOC:dhl, GOC:ecd, GOC:jh2, GOC:jid, GOC:mlg, GOC:rph];"The chemical reactions and pathways, including anabolism and catabolism, by which living organisms transform chemical substances. Metabolic processes typicall…	8	20	256	343	361	213	228	247	249	300	266	-1.32193	271.772	-0.382372	0.109195	-3.50174	0.000462236	0.00724192	271.213	-0.358256	0.143597	-2.49486	0.0126005	0.0797497	296.27	-0.378253	0.133656	-2.83006	0.00465398	0.0648215
ENSDARG00000017772	1	50968908	50990889	mdh1aa	malate dehydrogenase 1Aa, NAD (soluble)	.	Catalysis of an oxidation-reduction (redox) reaction, a reversible chemical reaction in which the oxidation state of an atom or atoms within a molecule is altered. One substrate acts as a hydrogen or electron donor and becomes oxidized, while the other acts as hydrogen or electron acceptor and becomes reduced. [GOC:go_curators];"A metabolic process that results in the removal or addition of one o…	42	506	7656	6743	7836	5117	5556	5438	7926	6996	7137	-3.59068	6650.82	-0.278403	0.0928984	-2.99685	0.00272786	0.0282634	6345.08	-0.358825	0.107007	-3.35328	0.000798596	0.00917913	7379.67	-0.200314	0.094187	-2.12677	0.0334393	0.248752
ENSDARG00000098724	12	48965049	48970299	rgrb	.	.	The component of a membrane consisting of the gene products and protein complexes having at least some part of their peptide sequence embedded in the hydrophobic region of the membrane. [GOC:dos, GOC:go_curators];"The sequence of reactions within a cell required to convert absorbed photons into a molecular signal." [GOC:go_curators];"Combining with an extracellular signal and transmitting the sig…	4	60	413	304	400	279	273	248	401	324	287	-3.90689	323.653	-0.336143	0.131977	-2.54698	0.010866	0.0769243	317.641	-0.359727	0.154952	-2.32155	0.0202573	0.11266	355.8	-0.302117	0.141568	-2.13408	0.0328361	0.245748
ENSDARG00000053485	17	45071531	45104750	aldh6a1	aldehyde dehydrogenase 6 family, member A1	.	Catalysis of an oxidation-reduction (redox) reaction in which an aldehyde or ketone (oxo) group acts as a hydrogen or electron donor and reduces NAD or NADP. [GOC:jl];"Catalysis of the reaction: 2-methyl-3-oxopropanoate + CoA + NAD+ = propanoyl-CoA + CO2 + NADH + H+." [EC:1.2.1.27];"The chemical reactions and pathways, including anabolism and catabolism, by which living organisms transform chemic…	83	249	5716	5293	5878	4070	3895	4319	5977	5386	5009	-1.58496	5013.49	-0.298844	0.076208	-3.92143	8.80245e-05	0.001939	4820.17	-0.360608	0.0930262	-3.87641	0.000106009	0.00171159	5543.73	-0.232929	0.0922827	-2.52408	0.0116001	0.122851
ENSDARG00000037997	16	10318893	10327620	tubb5	tubulin, beta 5	.	A process that is carried out at the cellular level which results in the assembly, arrangement of constituent parts, or disassembly of cytoskeletal structures. [GOC:dph, GOC:jl, GOC:mah];"Interacting selectively and non-covalently with a nucleotide, any compound consisting of a nucleoside that is esterified with (ortho)phosphate or an oligophosphate at any hydroxyl group on the ribose or deoxyrib…	126	345	2727	3297	3683	2367	2429	2160	2269	3000	2387	-1.45317	2695.06	-0.42318	0.115095	-3.67678	0.000236197	0.00421105	2749.28	-0.360721	0.114116	-3.16101	0.00157225	0.0156975	2906.15	-0.491709	0.111988	-4.39072	1.12978e-05	0.000497198
ENSDARG00000101584	7	14353922	14381369	CU467822.1	.	.	.	15	32	742	751	779	539	495	616	688	739	602	-1.09311	656.454	-0.358082	0.0792508	-4.51833	6.23278e-06	0.000218229	647.046	-0.361658	0.109144	-3.3136	0.000921035	0.0102606	718.882	-0.337266	0.107085	-3.14953	0.00163535	0.0284058
ENSDARG00000052271	7	39537790	39552314	slc22a18	solute carrier family 22, member 18	.	Enables the directed movement of substances (such as macromolecules, small molecules, ions) into, out of or within a cell, or between cells. A transporter is in a fixed location in the cell and allows molecules to pass via a channel or a pore in its structure. [GOC:ai, GOC:dgf];"The component of a membrane consisting of the gene products and protein complexes having at least some part of their pe…	2	24	597	677	596	483	426	436	640	532	598	-3.58496	549.664	-0.315405	0.0990908	-3.18299	0.00145764	0.0175303	531.77	-0.366428	0.125457	-2.92075	0.00349185	0.0298765	607.675	-0.256734	0.114944	-2.23356	0.0255123	0.208334
ENSDARG00000101074	12	25845494	25881944	glud1b	glutamate dehydrogenase 1b	.	The part of a cell, extracellular environment or virus in which a gene product is located. A gene product may be located in one or more parts of a cell and its location may be as specific as a particular macromolecular complex, that is, a stable, persistent association of macromolecules that function together. [GOC:go_curators, NIF_Subcellular:sao-1337158144];"A metabolic process that results in …	30	715	15325	14362	15373	10252	10261	12151	15771	14720	14612	-4.57491	13503.8	-0.27789	0.0817514	-3.3992	0.000675823	0.00971718	12837.2	-0.368409	0.0942973	-3.90689	9.34921e-05	0.00153232	15022.7	-0.190086	0.086622	-2.19443	0.0282043	0.222316
ENSDARG00000022599	6	13896264	13920394	dnpep	aspartyl aminopeptidase	.	Catalysis of the hydrolysis of N-terminal amino acid residues from in a polypeptide chain. [GOC:jl, ISBN:0198506732];"Interacting selectively and non-covalently with zinc (Zn) ions." [GOC:ai];"Catalysis of the hydrolysis of a peptide bond. A peptide bond is a covalent bond formed when the carbon atom from the carboxyl group of one amino acid shares electrons with the nitrogen atom from the amino …	4	12	339	309	301	214	212	256	312	332	309	-1.58496	284.325	-0.272033	0.111949	-2.42998	0.0150998	0.0967173	269.732	-0.368604	0.144516	-2.55061	0.0107536	0.0709464	317.44	-0.17567	0.128878	-1.36307	0.172859	0.597829
ENSDARG00000079578	7	48252638	48263633	rbpms2b	RNA binding protein with multiple splicing 2b	.	Interacting selectively and non-covalently with the U1 small nuclear RNA (U1 snRNA). [GOC:mah];"Interacting selectively and non-covalently with an identical protein to form a homodimer." [GOC:jl];"Interacting selectively and non-covalently with a stem-loop in a small nuclear RNA (snRNA). An RNA stem-loop is a secondary RNA structure consisting of a double-stranded RNA (dsRNA) stem and a terminal …	7	21	464	520	511	347	307	421	482	494	492	-1.58496	443.437	-0.290327	0.0921265	-3.1514	0.00162492	0.0191638	423.218	-0.37255	0.123809	-3.00907	0.0026205	0.0238054	493.62	-0.206313	0.109105	-1.89096	0.0586295	0.343963
ENSDARG00000008858	2	42135719	42152135	cyp7b1	cytochrome P450, family 7, subfamily B, polypeptide 1	.	Interacting selectively and non-covalently with heme, any compound of iron complexed in a porphyrin (tetrapyrrole) ring. [CHEBI:30413, GOC:ai];"Interacting selectively and non-covalently with iron (Fe) ions." [GOC:ai];"Interacting selectively and non-covalently with any metal ion." [GOC:ai];"Catalysis of an oxidation-reduction (redox) reaction in which hydrogen or electrons are transferred from e…	12	32	432	394	409	322	264	298	416	373	351	-1.41504	359.507	-0.339089	0.0989714	-3.42613	0.000612237	0.00903442	350.386	-0.374052	0.134841	-2.77402	0.00553681	0.0431391	396.987	-0.288939	0.121387	-2.38031	0.0172982	0.161126
ENSDARG00000055158	17	32822588	32865788	prox1a	prospero homeobox 1a	lymphangiogenesis disrupted;kinocilium part_of neuromast hair cell absent;interneuron part_of hypothalamus decreased amount;thoracic duct aplastic;thoracic duct decreased length;ventral region part_of whole organism edematous;anterior region part_of trunk lacks all parts of type;lymphatic endothelial cell differentiation disrupted;neuromast hair cell decreased amount;somatic stem cell part_of neu…	The process in which a relatively unspecialized cell acquires specialized features of a neuromast hair cell. Hair cells are the sensory receptors of the neuromast and are located in a portion of the neuromast called the sensory strip. Each hair cell of the neuromast is morphologically polarized as a result of the relative position of the single kinocilium and the clusters of stereocilia on its ap…	33	139	659	809	795	451	552	604	648	798	614	-2.07455	653.253	-0.34318	0.110408	-3.10827	0.00188183	0.0212534	637.99	-0.380337	0.126471	-3.0073	0.00263582	0.0239229	721.044	-0.302766	0.1163	-2.60333	0.00923236	0.105683
ENSDARG00000061885	9	32560399	32604414	satb2	SATB homeobox 2	actin filament part_of whole organism disorganized;epiboly involved in gastrulation with mouth forming second arrested;E-YSL immature;cell part_of whole organism dead	Any molecular function by which a gene product interacts selectively and non-covalently with DNA (deoxyribonucleic acid). [GOC:dph, GOC:jl, GOC:tb, GOC:vw];"A membrane-bounded organelle of eukaryotic cells in which chromosomes are housed and replicated. In most cells, the nucleus contains all of the cell's chromosomes except the organellar chromosomes, and is the site of RNA synthesis and process…	9	39	195	200	226	137	154	144	162	230	156	-2.11548	177.115	-0.360516	0.134424	-2.68193	0.00731998	0.0578732	174.429	-0.384546	0.157819	-2.43662	0.0148251	0.0902264	195.283	-0.319196	0.151914	-2.10117	0.0356263	0.258873
ENSDARG00000029761	19	20061892	20106486	mpp6b	membrane protein, palmitoylated 6b (MAGUK p55 subfamily member 6)	.	.	18	75	560	498	586	338	395	430	536	568	475	-2.05889	482.726	-0.312986	0.105548	-2.96533	0.00302357	0.0305119	463.615	-0.387976	0.130711	-2.9682	0.00299547	0.0264344	537.407	-0.236342	0.115025	-2.05471	0.0399072	0.274524
ENSDARG00000078770	20	46924390	46946574	si:ch73-21k16.5	si:ch73-21k16.5	.	Catalysis of the transfer of an acyl group to an oxygen atom on the acceptor molecule. [GOC:ai];"Catalysis of the transfer of an acyl group from one compound (donor) to another (acceptor)." [GOC:jl, ISBN:0198506732];"The chemical reactions and pathways involving lipids, as carried out by individual cells." [GOC:jl];"The chemical reactions and pathways, including anabolism and catabolism, by which…	5	15	200	202	226	154	120	168	202	181	200	-1.58496	181.722	-0.337535	0.109821	-3.0735	0.00211563	0.0232774	176.065	-0.388683	0.155995	-2.49163	0.0127159	0.0801298	202.031	-0.267237	0.136873	-1.95245	0.0508844	0.317902
ENSDARG00000044815	7	50448478	50477289	serinc4	serine incorporator 4	.	A lipid bilayer along with all the proteins and protein complexes embedded in it an attached to it. [GOC:dos, GOC:mah, ISBN:0815316194];"The directed movement of L-serine, the L-enantiomer of 2-amino-3-hydroxypropanoic acid, into, out of or within a cell, or between cells, by means of some agent such as a transporter or pore." [GOC:ai, GOC:jsg, GOC:mah];"The component of a membrane consisting of …	3	20	206	184	207	136	121	163	193	204	167	-2.73697	173.876	-0.324807	0.117869	-2.75567	0.00585719	0.0489584	167.669	-0.389561	0.160324	-2.42983	0.0151059	0.0915181	193.784	-0.245291	0.142504	-1.72129	0.0851982	0.426095
ENSDARG00000043257	20	20816747	20821789	ckbb	creatine kinase, brain b	.	Catalysis of the transfer of a phosphorus-containing group from one compound (donor) to another (acceptor). [GOC:jl, ISBN:0198506732];"Catalysis of the transfer of a phosphate group, usually from ATP, to a substrate molecule." [ISBN:0198506732];"Catalysis of the reaction: ATP + creatine = N-phosphocreatine + ADP + 2 H(+)." [EC:2.7.3.2, RHEA:17160];"The process of introducing a phosphate group int…	11	1169	10260	9900	9479	7304	6617	7121	10729	8984	8758	-6.73163	8720.26	-0.320886	0.0923333	-3.4753	0.000510275	0.00783825	8385.87	-0.395097	0.102115	-3.86914	0.000109218	0.00175505	9700.97	-0.246638	0.101073	-2.44021	0.0146787	0.144633
ENSDARG00000004094	8	20140321	20192151	acsbg2	acyl-CoA synthetase bubblegum family member 2	.	Catalysis of a biochemical reaction at physiological temperatures. In biologically catalyzed reactions, the reactants are known as substrates, and the catalysts are naturally occurring macromolecular substances known as enzymes. Enzymes possess specific binding sites for substrates, and are usually composed wholly or largely of protein, but RNA that has catalytic activity (ribozyme) is often also…	58	161	1445	1599	1701	995	1100	1255	1292	1685	1314	-1.47294	1364.64	-0.356978	0.0993501	-3.59313	0.000326729	0.00549002	1334.13	-0.396734	0.103862	-3.81983	0.000133542	0.00207715	1508.23	-0.314502	0.109883	-2.86215	0.00420783	0.059869
ENSDARG00000031817	1	25322445	25370281	trim2a	tripartite motif containing 2a	myeloid cell decreased amount;hemoglobin complex part_of nucleate erythrocyte decreased amount	The process in which a relatively unspecialized myeloid precursor cell acquires the specialized features of any cell of the myeloid leukocyte, megakaryocyte, thrombocyte, or erythrocyte lineages. [GOC:add, ISBN:0781735149];"A first transient wave of blood cell production that, in vertebrates, gives rise to erythrocytes (red blood cells) and myeloid cells." [GOC:bf, GOC:dph, PMID:15378083, PMID:15…	3	36	296	333	336	215	202	261	305	334	306	-3.58496	284.101	-0.302145	0.101056	-2.98986	0.00279103	0.0287642	270.533	-0.397769	0.135628	-2.9328	0.00335924	0.0289158	318.086	-0.205138	0.12155	-1.68769	0.0914712	0.442872
ENSDARG00000061551	15	29276508	29317067	rap1gap2a	RAP1 GTPase activating protein 2a	.	Binds to and increases the activity of a GTPase, an enzyme that catalyzes the hydrolysis of GTP. [GOC:mah];"Any process that activates or increases the activity of a GTPase." [GOC:jl, GOC:mah];"Any process that modulates the frequency, rate or extent of small GTPase mediated signal transduction." [GOC:go_curators]	10	25	452	502	541	340	330	380	481	461	435	-1.32193	431.525	-0.353227	0.0778072	-4.53977	5.63158e-06	0.000202841	419.274	-0.39991	0.117936	-3.3909	0.00069663	0.0081963	478.761	-0.291479	0.108313	-2.69108	0.00712221	0.087257
ENSDARG00000013236	20	7149100	7176810	dhcr24	24-dehydrocholesterol reductase	.	A lipid bilayer along with all the proteins and protein complexes embedded in it an attached to it. [GOC:dos, GOC:mah, ISBN:0815316194];"The chemical reactions and pathways involving steroids, compounds with a 1,2,cyclopentanoperhydrophenanthrene nucleus." [ISBN:0198547684];"Catalysis of the reaction: ergosterol + NADP(+) = ergosta-5,7,22,24(24(1))-tetraen-3beta-ol + H(+) + NADPH." [EC:1.3.1.71, …	4	21	171	206	196	121	146	126	182	202	164	-2.39232	166.676	-0.319371	0.129139	-2.47308	0.0133956	0.0887971	159.68	-0.40596	0.167916	-2.41764	0.0156215	0.093817	186.747	-0.226637	0.142821	-1.58686	0.112544	0.491159
ENSDARG00000051915	7	57539146	57619470	pde5ab	phosphodiesterase 5A, cGMP-specific, b	.	The cellular process in which a signal is conveyed to trigger a change in the activity or state of a cell. Signal transduction begins with reception of a signal (e.g. a ligand binding to a receptor or receptor activation by a stimulus such as light), or for signal transduction in the absence of ligand, signal-withdrawal or the activity of a constitutively active receptor. Signal transduction ends…	6	16	606	582	616	438	375	452	634	540	571	-1.41504	529.319	-0.31925	0.0922264	-3.46159	0.000536997	0.00815554	506.475	-0.407882	0.117267	-3.47825	0.000504708	0.00631062	591.844	-0.229626	0.109547	-2.09614	0.03607	0.259833
ENSDARG00000028715	16	28270037	28371330	mindy3	MINDY lysine 48 deubiquitinase 3	.	Catalysis of the hydrolysis of a peptide bond. A peptide bond is a covalent bond formed when the carbon atom from the carboxyl group of one amino acid shares electrons with the nitrogen atom from the amino group of a second amino acid. [GOC:jl, ISBN:0815332181];"The hydrolysis of proteins into smaller polypeptides and/or amino acids by cleavage of their peptide bonds." [GOC:bf, GOC:mah];"Catalysi…	15	41	674	619	633	516	377	453	675	578	504	-1.45066	554.304	-0.361032	0.111827	-3.2285	0.00124443	0.0155814	540.584	-0.409995	0.131688	-3.11339	0.00184954	0.0179133	615.663	-0.307182	0.11974	-2.5654	0.0103057	0.113503
ENSDARG00000053453	3	33345347	33379440	mpp2a	membrane protein, palmitoylated 2a (MAGUK p55 subfamily member 2)	.	The part of a cell, extracellular environment or virus in which a gene product is located. A gene product may be located in one or more parts of a cell and its location may be as specific as a particular macromolecular complex, that is, a stable, persistent association of macromolecules that function together. [GOC:go_curators, NIF_Subcellular:sao-1337158144];"Any process specifically pertinent t…	3	29	544	461	534	377	329	366	514	486	448	-3.27302	447.079	-0.342028	0.0989917	-3.45512	0.00055005	0.00833005	431.434	-0.411931	0.129581	-3.17894	0.00147815	0.0149517	498.794	-0.26456	0.117554	-2.25054	0.0244148	0.202935
ENSDARG00000099323	10	29431529	29705509	dlg2	discs, large homolog 2 (Drosophila)	.	.	4	45	681	762	830	520	466	602	769	737	745	-3.49185	670.077	-0.300745	0.0885404	-3.39669	0.000682053	0.00978038	635.095	-0.412307	0.10964	-3.76056	0.000169536	0.00253544	752.344	-0.195626	0.0985778	-1.98448	0.0472019	0.303961
ENSDARG00000006640	19	860830	874888	eomesa	eomesodermin homolog a	deep blastomere part_of blastodisc shape;extension distended;yolk flattened;dorsal fin absent;microtubule part_of yolk spatial pattern;microtubule cytoskeleton organization decreased process quality;endodermal cell fate specification process quality;nucleus part_of YSL aggregated;forerunner cell group split;nucleus part_of YSL morphology;deep blastomere part_of blastodisc crowded;invagination inv…	Interacting selectively and non-covalently with a specific DNA sequence in order to modulate transcription by RNA polymerase II. The transcription factor may or may not also interact selectively with a protein or macromolecular complex. [GOC:txnOH];"A membrane-bounded organelle of eukaryotic cells in which chromosomes are housed and replicated. In most cells, the nucleus contains all of the cell'…	2	48	109	122	169	64	101	101	94	126	96	-4.58496	108.353	-0.435644	0.163813	-2.6594	0.00782793	0.0608291	109.395	-0.419725	0.201905	-2.07882	0.0376337	0.175635	119.572	-0.424599	0.168687	-2.51708	0.0118334	0.124628
ENSDARG00000099563	15	33843596	33865029	inpp5ka	inositol polyphosphate-5-phosphatase Ka	sarcomere organization disrupted;anterior region part_of lens mislocalised;I band part_of somite morphology;eye oblique orientation;lens development in camera-type eye disrupted;nuclear chromosome telomeric region part_of whole organism decreased length;muscle cell part_of somite attachment quality;skeletal muscle cell part_of somite disorganized;nucleus part_of lens mislocalised anteriorly;neuro…	A process that is carried out at the cellular level which results in the assembly, arrangement of constituent parts, or disassembly of a neuromuscular junction that targets a skeletal muscle fiber. [GOC:mtg_OBO2OWL_2013];"The progression of a somite from its initial formation to the mature structure. Somites are mesodermal clusters that are arranged segmentally along the anterior posterior axis o…	6	18	577	618	633	443	384	436	658	528	553	-1.58496	530.939	-0.338468	0.093262	-3.62922	0.000284276	0.00490422	509.776	-0.425686	0.114052	-3.7324	0.000189667	0.00277624	594.441	-0.250358	0.110378	-2.26819	0.0233175	0.197053
ENSDARG00000061664	9	12403289	12424794	zgc:162707	zgc:162707	.	The part of a cell, extracellular environment or virus in which a gene product is located. A gene product may be located in one or more parts of a cell and its location may be as specific as a particular macromolecular complex, that is, a stable, persistent association of macromolecules that function together. [GOC:go_curators, NIF_Subcellular:sao-1337158144];"The actions of a single gene product…	1	16	143	153	144	89	101	108	147	144	109	-4	125.366	-0.36651	0.13271	-2.76173	0.00574958	0.0484387	121.893	-0.425994	0.176065	-2.41953	0.0155407	0.0935684	140.306	-0.283804	0.156418	-1.8144	0.0696157	0.379571
ENSDARG00000100515	14	15760253	15763648	dusp1	dual specificity phosphatase 1	.	Catalysis of the reaction: MAP kinase serine/threonine/tyrosine phosphate + H2O = MAP kinase serine/threonine/tyrosine + phosphate. [GOC:mah, PMID:12184814];"Any process that terminates the activity of the active enzyme MAP kinase." [PMID:9561267];"Catalysis of the hydrolysis of phosphoric monoesters, releasing inorganic phosphate." [EC:3.1.3, EC:3.1.3.41, GOC:curators, GOC:pg];"The process of re…	44	122	3311	3308	3165	1854	2533	2327	3062	3488	3110	-1.47131	2880.82	-0.305904	0.123356	-2.47984	0.0131442	0.0879505	2732.15	-0.426576	0.130145	-3.27771	0.00104654	0.0113798	3244.31	-0.206237	0.0988249	-2.08689	0.0368979	0.262725
ENSDARG00000101735	9	2393764	2487171	chn1	chimerin 1	axon part_of cranial nerve III mislocalised;optomotor response decreased process quality;axon extension occurs_in cranial nerve III process quality;oculomotor nerve formation decreased process quality	The process in which a signal is passed on to downstream components within the cell, which become activated themselves to further propagate the signal and finally trigger a change in the function or state of the cell. [GOC:bf, GOC:jl, GOC:signaling, ISBN:3527303782];"Binds to and increases the activity of a GTPase, an enzyme that catalyzes the hydrolysis of GTP." [GOC:mah];"Combining with a phorb…	27	74	830	858	900	512	625	643	738	778	698	-1.45457	727.13	-0.419384	0.0881027	-4.76017	1.93427e-06	8.19968e-05	721.221	-0.427376	0.120301	-3.55256	0.000381505	0.00501997	803.657	-0.39774	0.099325	-4.00443	6.21681e-05	0.00202535
ENSDARG00000045415	24	8904135	8973300	gnal	.	.	Interacting selectively and non-covalently with a nucleotide, any compound consisting of a nucleoside that is esterified with (ortho)phosphate or an oligophosphate at any hydroxyl group on the ribose or deoxyribose. [GOC:mah, ISBN:0198547684];"Catalysis of the reaction: GTP + H2O = GDP + phosphate." [ISBN:0198547684];"A series of molecular signals that proceeds with an activated receptor promotin…	8	21	462	443	394	288	265	344	456	376	366	-1.39232	373.975	-0.362758	0.113168	-3.20548	0.00134839	0.0165145	362.872	-0.427804	0.139769	-3.0608	0.00220746	0.0208227	417.842	-0.289218	0.129187	-2.23875	0.025172	0.206704
ENSDARG00000011066	1	38416106	38538284	glra3	.	mechanosensory behavior process quality;thigmotaxis process quality	The vesicular release of glycine from a presynapse, across a chemical synapse, the subsequent activation of glycine receptors at the postsynapse of a target cell (neuron, muscle, or secretory cell) and the effects of this activation on the postsynaptic membrane potential and ionic composition of the postsynaptic cytosol. This process encompasses both spontaneous and evoked release of neurotransmi…	1	23	408	442	473	272	292	345	425	448	404	-4.52356	385.302	-0.327553	0.097412	-3.36255	0.00077226	0.0107627	367.63	-0.428925	0.126578	-3.38861	0.000702479	0.008252	432.999	-0.22779	0.111537	-2.04228	0.0411234	0.28033
ENSDARG00000058608	5	12549551	12560569	wsb2	WD repeat and SOCS box containing 2	.	The process in which one or more ubiquitin groups are added to a protein. [GOC:ai];"The living contents of a cell; the matter contained within (but not including) the plasma membrane, usually taken to exclude large vacuoles and masses of secretory or ingested material. In eukaryotes it includes the nucleus and cytoplasm." [ISBN:0198506732];"The process in which a signal is passed on to downstream…	1	14	175	145	182	124	106	109	190	121	136	-3.80735	141.949	-0.375007	0.145543	-2.57661	0.00997742	0.0728342	138.895	-0.429679	0.173581	-2.47539	0.0133091	0.0830596	158.514	-0.304159	0.161685	-1.88118	0.0599469	0.349009
ENSDARG00000013371	16	12793911	12809886	isoc2	isochorismatase domain containing 2	.	The chemical reactions and pathways, including anabolism and catabolism, by which living organisms transform chemical substances. Metabolic processes typically transform small molecules, but also include macromolecular processes such as DNA repair and replication, and protein synthesis and degradation. [GOC:go_curators, ISBN:0198547684];"Catalysis of a biochemical reaction at physiological temper…	1	11	215	187	243	148	147	141	181	210	192	-3.45943	183.445	-0.374289	0.119817	-3.12385	0.00178503	0.0204856	178.451	-0.43169	0.160603	-2.68793	0.0071896	0.0524927	205.097	-0.297012	0.142092	-2.09028	0.0365931	0.261979
ENSDARG00000004415	12	30977736	31103906	tcf7l2	transcription factor 7 like 2	lens morphogenesis in camera-type eye delayed;whole organism lethal (sensu genetics);nucleus part_of thalamus absent;3'5'-cyclic AMP part_of whole organism decreased amount;canonical Wnt signaling pathway decreased process quality;post-vent region curved;neuron part_of thalamus absent;intestinal epithelium flat;intestinal villus decreased length;swimming behavior decreased process quality;embryo …	Interacting selectively and non-covalently with DNA of a specific nucleotide composition, e.g. GC-rich DNA binding, or with a specific sequence motif or type of DNA e.g. promotor binding or rDNA binding. [GOC:jl];"Any process that modulates the frequency, rate or extent of transcription from an RNA polymerase II promoter." [GOC:go_curators, GOC:txnOH];"The establishment of the diencephalon with r…	60	255	652	768	830	463	483	591	743	819	682	-2.08746	660.561	-0.302655	0.107207	-2.82308	0.00475644	0.0421928	622.685	-0.439028	0.115984	-3.78526	0.00015355	0.00233484	746.661	-0.183315	0.106435	-1.72232	0.0850119	0.425425
ENSDARG00000061989	8	18830759	18840694	mpnd	MPN domain containing	eye decreased size;yolk deformed;anterior-most region part_of head decreased size;cellular pigmentation decreased occurrence;extension aplastic	The hydrolysis of proteins into smaller polypeptides and/or amino acids by cleavage of their peptide bonds. [GOC:bf, GOC:mah];"Catalysis of the hydrolysis of a peptide bond. A peptide bond is a covalent bond formed when the carbon atom from the carboxyl group of one amino acid shares electrons with the nitrogen atom from the amino group of a second amino acid." [GOC:jl, ISBN:0815332181];"Catalysi…	7	18	320	361	378	232	241	244	336	310	320	-1.36257	301.873	-0.378248	0.0927056	-4.0801	4.50158e-05	0.00112004	292.871	-0.442253	0.132946	-3.32656	0.000879264	0.00989855	337.799	-0.29969	0.118226	-2.5349	0.0112478	0.12055
ENSDARG00000042988	1	12009673	12044390	slc24a2	solute carrier family 24 (sodium/potassium/calcium exchanger), member 2	.	The series of events required for an organism to receive a visual stimulus, convert it to a molecular signal, and recognize and characterize the signal. Visual stimuli are detected in the form of photons and are processed to form an image. [GOC:ai];"Any process involved in the maintenance of an internal steady state of calcium ions at the level of a cell." [GOC:ceb, GOC:mah];"A process in which a…	2	43	564	873	873	409	526	615	638	766	558	-4.42626	640.149	-0.407534	0.137505	-2.96378	0.00303887	0.0306187	633.328	-0.44259	0.151975	-2.91225	0.00358837	0.0304918	711.856	-0.376148	0.134144	-2.80405	0.00504648	0.0686007
ENSDARG00000056938	4	16337156	16345227	kera	keratocan	cell part_of whole organism dead;activation of cysteine-type endopeptidase activity involved in apoptotic process increased occurrence	That part of a multicellular organism outside the cells proper, usually taken to be outside the plasma membranes, and occupied by fluid. [ISBN:0198547684];"The series of events required for an organism to receive a visual stimulus, convert it to a molecular signal, and recognize and characterize the signal. Visual stimuli are detected in the form of photons and are processed to form an image." [G…	1	14	536	542	551	356	373	379	496	449	347	-3.80735	446.111	-0.474947	0.104917	-4.5269	5.98558e-06	0.00021187	452.213	-0.443649	0.121723	-3.64474	0.000267667	0.0037337	489.969	-0.485907	0.123918	-3.92119	8.81129e-05	0.00275491
ENSDARG00000076386	7	1045637	1057216	epdl1	ependymin-like 1	.	The space external to the outermost structure of a cell. For cells without external protective or external encapsulating structures this refers to space outside of the plasma membrane. This term covers the host cell environment outside an intracellular parasite. [GOC:go_curators];"The binding of a cell to the extracellular matrix via adhesion molecules." [GOC:hb];"Interacting selectively and non-…	2	23	1203	973	970	842	565	739	1027	756	697	-3.52356	861.308	-0.466389	0.138693	-3.36274	0.000771744	0.0107625	875.241	-0.444926	0.145533	-3.05721	0.00223405	0.021013	947.008	-0.490321	0.135947	-3.6067	0.000310116	0.00761585
ENSDARG00000075436	15	19697246	19724932	sytl2b	synaptotagmin-like 2b	.	Fusion of the membrane of a transport vesicle with its target membrane. [GOC:jid];"Interacting selectively and non-covalently with phospholipids, a class of lipids containing phosphoric acid as a mono- or diester, in the presence of calcium." [GOC:jl];"Interacting selectively and non-covalently with a syntaxin, a SNAP receptor involved in the docking of synaptic vesicles at the presynaptic zone o…	1	20	495	424	522	322	326	327	471	498	381	-4.32193	414.521	-0.355337	0.113132	-3.14091	0.00168422	0.0196771	399.061	-0.446039	0.131816	-3.38381	0.000714879	0.00837923	465.578	-0.265402	0.124915	-2.12465	0.0336154	0.249796
ENSDARG00000033655	16	34523515	34527206	stmn1b	stathmin 1b	.	A prolongation or process extending from a nerve cell, e.g. an axon or dendrite. [GOC:jl, http://www.cogsci.princeton.edu/~wn/];"The removal of tubulin heterodimers from one or both ends of a microtubule." [ISBN:0815316194];"Any process that modulates the frequency, rate or extent of the formation, arrangement of constituent parts, or disassembly of cytoskeletal structures." [GOC:ai];"Any process…	9	125	8237	7025	7919	5744	4523	5603	8232	7002	6601	-3.79586	6697.92	-0.356575	0.102071	-3.49339	0.000476922	0.00740132	6446	-0.447148	0.109545	-4.08186	4.46763e-05	0.000814779	7516.39	-0.271223	0.103978	-2.60846	0.00909503	0.104683
ENSDARG00000087402	25	33192404	33250323	TPM1 (1 of many)	tropomyosin 1 (alpha)	.	The action of a molecule that contributes to the structural integrity of a muscle fiber. [GOC:mah];"A process that is carried out at the cellular level which results in the assembly, arrangement of constituent parts, or disassembly of cytoskeletal structures comprising actin filaments. Includes processes that control the spatial distribution of actin filaments, such as organizing filaments into m…	29	285	3580	3589	3546	2521	2221	2575	4144	3519	3439	-3.29684	3193.83	-0.282822	0.108025	-2.61811	0.00884175	0.0665018	2976.85	-0.451492	0.0950773	-4.74868	2.04745e-06	5.3585e-05	3629.58	-0.142437	0.0955422	-1.49083	0.136006	0.538269
ENSDARG00000009594	19	17400263	17407115	nr1d2b	nuclear receptor subfamily 1, group D, member 2b	.	A membrane-bounded organelle of eukaryotic cells in which chromosomes are housed and replicated. In most cells, the nucleus contains all of the cell's chromosomes except the organellar chromosomes, and is the site of RNA synthesis and processing. In some species, or in specialized cell types, RNA metabolism or DNA replication may be absent. [GOC:go_curators];"Interacting selectively and non-coval…	48	182	4488	4055	4218	3159	2583	2942	4677	3946	3824	-1.92283	3725.91	-0.332606	0.105621	-3.14904	0.00163806	0.0192975	3543.5	-0.453895	0.107924	-4.20571	2.60266e-05	0.000510867	4205.27	-0.224975	0.102121	-2.20302	0.0275932	0.219389
ENSDARG00000017742	8	8532407	8624008	grm6a	glutamate receptor, metabotropic 6a	.	The membrane surrounding a cell that separates the cell from its external environment. It consists of a phospholipid bilayer and associated proteins. [ISBN:0716731363];"Combining with an extracellular signal and transmitting the signal across the membrane by activating an associated G-protein; promotes the exchange of GDP for GTP on the alpha subunit of a heterotrimeric G-protein complex." [GOC:b…	1	17	87	114	120	52	80	75	92	98	84	-4.08746	88.321	-0.416485	0.153822	-2.70757	0.00677774	0.0545983	86.9074	-0.456199	0.206709	-2.20695	0.0273172	0.1398	99.2685	-0.339339	0.168027	-2.01956	0.0434294	0.290009
ENSDARG00000092810	2	49522178	49569304	stap2a	signal transducing adaptor family member 2a	.	The part of a cell, extracellular environment or virus in which a gene product is located. A gene product may be located in one or more parts of a cell and its location may be as specific as a particular macromolecular complex, that is, a stable, persistent association of macromolecules that function together. [GOC:go_curators, NIF_Subcellular:sao-1337158144]	4	20	180	216	285	155	120	176	229	196	169	-2.32193	189.062	-0.403246	0.132397	-3.04574	0.0023211	0.0249711	185.145	-0.456901	0.166738	-2.74023	0.00613966	0.0466371	211.973	-0.331769	0.148392	-2.23577	0.0253672	0.207737
ENSDARG00000035719	3	16134376	16142057	arl5c	ADP-ribosylation factor-like 5C	.	The living contents of a cell; the matter contained within (but not including) the plasma membrane, usually taken to exclude large vacuoles and masses of secretory or ingested material. In eukaryotes it includes the nucleus and cytoplasm. [ISBN:0198506732];"Interacting selectively and non-covalently with a nucleotide, any compound consisting of a nucleoside that is esterified with (ortho)phosphat…	6	17	549	423	471	361	311	289	514	409	457	-1.5025	417.118	-0.344428	0.135881	-2.53477	0.011252	0.0791483	398.444	-0.462179	0.152921	-3.02234	0.00250833	0.0229859	472.015	-0.240104	0.132525	-1.81176	0.0700229	0.381043
ENSDARG00000110596	22	291091	294700	CABZ01079179.1	.	.	.	2	11	207	173	192	150	122	100	198	181	148	-2.45943	162.207	-0.370001	0.151727	-2.4386	0.0147441	0.0952983	156.388	-0.470176	0.183603	-2.56082	0.0104425	0.0693437	183.693	-0.274969	0.149606	-1.83796	0.0660689	0.368873
ENSDARG00000014866	25	37073189	37084032	hprt1l	.	.	Catalysis of the transfer of a glycosyl group from one compound (donor) to another (acceptor). [GOC:jl, ISBN:0198506732];"All of the contents of a cell excluding the plasma membrane and nucleus, but including other subcellular structures." [ISBN:0198547684];"Interacting selectively and non-covalently with any metal ion." [GOC:ai];"Interacting selectively and non-covalently with a nucleotide, any …	4	18	214	217	227	145	140	149	210	214	194	-2.16993	188.045	-0.367606	0.110881	-3.31531	0.000915417	0.0122174	180.17	-0.47282	0.152274	-3.10506	0.00190237	0.0183501	212.916	-0.255689	0.134306	-1.90379	0.0569381	0.339027
ENSDARG00000007247	25	10458990	10483226	ric8a	RIC8 guanine nucleotide exchange factor A	.	.	1	28	596	497	596	374	327	426	599	490	479	-4.80735	481.852	-0.377145	0.110518	-3.41252	0.000643653	0.00941117	464.139	-0.474782	0.129339	-3.67083	0.000241766	0.00341705	543.807	-0.280832	0.121649	-2.30854	0.0209694	0.18437
ENSDARG00000039150	13	36037970	36050327	lgmn	legumain	.	Catalysis of the hydrolysis of internal, alpha-peptide bonds in a polypeptide chain by a mechanism in which the sulfhydryl group of a cysteine residue at the active center acts as a nucleophile. [GOC:mah, http://merops.sanger.ac.uk/about/glossary.htm#CATTYPE, http://merops.sanger.ac.uk/about/glossary.htm#ENDOPEPTIDASE];"Catalysis of the hydrolysis of a peptide bond. A peptide bond is a covalent b…	46	141	7102	5517	6120	4690	3204	4670	6139	4195	5950	-1.61599	5250.49	-0.41292	0.137511	-3.00282	0.00267495	0.0278098	5166	-0.475356	0.134754	-3.52757	0.000419386	0.00544177	5877.32	-0.36382	0.132151	-2.75306	0.00590406	0.0769143
ENSDARG00000100531	6	53429228	53435711	abhd14b	abhydrolase domain containing 14B	.	Any process specifically pertinent to the functioning of integrated living units: cells, tissues, organs, and organisms. A process is a collection of molecular events with a defined beginning and end. [GOC:go_curators, GOC:isa_complete];"Catalysis of the hydrolysis of various bonds, e.g. C-O, C-N, C-C, phosphoric anhydride bonds, etc. Hydrolase is the systematic name for any enzyme of EC class 3.…	4	14	310	372	415	234	241	245	318	318	328	-1.80735	306.03	-0.421207	0.0967108	-4.35533	1.32868e-05	0.000406478	298.957	-0.480414	0.135538	-3.5445	0.000393359	0.00514671	343.776	-0.343589	0.121189	-2.83514	0.00458051	0.0640965
ENSDARG00000012881	3	20065861	20092124	slc4a1a	solute carrier family 4 (anion exchanger), member 1a (Diego blood group)	blood circulation increased rate;cell part_of whole organism dead;heart contraction decreased rate;nucleate erythrocyte basophilic;blood circulation decreased rate;blood quality;myofibril part_of cardiac muscle cell decreased size;cardiac muscle cell increased size;cardiac muscle cell part_of heart increased size;cardiac muscle cell part_of cardiac ventricle decreased amount;heart decreased funct…	Enables the transfer of a solute or solutes from one side of a membrane to the other according to the reaction: inorganic anion A(out) + inorganic anion B(in) = inorganic anion A(in) + inorganic anion B(out). [GOC:mah];"The process in which a myeloid precursor cell acquires specializes features of an erythrocyte." [GOC:mah];"Any process that modulates the internal pH of a cell, measured by the co…	1	33	463	673	702	451	340	414	427	640	523	-5.04439	509.165	-0.409463	0.136613	-2.99724	0.00272435	0.0282408	499.03	-0.481048	0.139684	-3.44382	0.000573566	0.0070397	571.607	-0.344582	0.141183	-2.44068	0.0146597	0.144593
ENSDARG00000007421	22	12770877	12786532	ftcd	formimidoyltransferase cyclodeaminase	.	Catalysis of a biochemical reaction at physiological temperatures. In biologically catalyzed reactions, the reactants are known as substrates, and the catalysts are naturally occurring macromolecular substances known as enzymes. Enzymes possess specific binding sites for substrates, and are usually composed wholly or largely of protein, but RNA that has catalytic activity (ribozyme) is often also…	2	26	674	700	822	497	512	426	582	639	654	-3.70044	607.936	-0.440028	0.105768	-4.16033	3.17791e-05	0.000835545	599.285	-0.484523	0.130522	-3.7122	0.000205468	0.00297296	680.678	-0.391188	0.107282	-3.64637	0.000265973	0.00674528
ENSDARG00000101959	15	34172371	34214440	etv1	ets variant 1	.	Interacting selectively and non-covalently with a specific DNA sequence (sometimes referred to as a motif) within the regulatory region of a gene in order to modulate transcription. [GOC:curators, GOC:txnOH];"Interacting selectively and non-covalently with a specific DNA sequence in order to modulate transcription by RNA polymerase II. The transcription factor may or may not also interact selecti…	8	27	163	137	180	86	104	120	100	145	92	-1.75489	125.021	-0.545429	0.156526	-3.4846	0.000492876	0.00761013	130.113	-0.484847	0.179926	-2.69471	0.00704499	0.0517731	137.587	-0.57113	0.167856	-3.4025	0.000667718	0.0142583
ENSDARG00000004060	11	35759652	35763323	bhlhe40	.	locomotor rhythm process quality	The rhythm of the locomotor activity of an organism during its 24 hour activity cycle. [GOC:go_curators];"A membrane-bounded organelle of eukaryotic cells in which chromosomes are housed and replicated. In most cells, the nucleus contains all of the cell's chromosomes except the organellar chromosomes, and is the site of RNA synthesis and processing. In some species, or in specialized cell types,…	31	220	1842	1748	1600	1285	993	1167	2182	1444	1345	-2.82716	1495.35	-0.347834	0.141574	-2.45691	0.0140137	0.0918299	1427.35	-0.486421	0.122422	-3.9733	7.0884e-05	0.00120814	1695.83	-0.240439	0.136286	-1.76423	0.0776931	0.403549
ENSDARG00000056690	7	25858380	25878560	mtmr1a	.	.	The removal of phosphoric residues from peptidyl-O-phospho-tyrosine to form peptidyl-tyrosine. [GOC:bf];"Catalysis of the reaction: 1-phosphatidyl-1D-myo-inositol 3,5-bisphosphate + H2O = a 1-phosphatidyl-1D-myo-inositol 5-phosphate + phosphate + 2 H+." [MetaCyc:RXN-10958, PMID:19901554];"Catalysis of the reaction: phosphatidylinositol phosphate(n) + H2O = phosphatidylinositol phosphate(n-1) + ph…	4	46	703	753	901	498	456	601	726	857	713	-3.52356	679.664	-0.340265	0.111444	-3.05324	0.00226386	0.0245036	642.307	-0.489511	0.114234	-4.28516	1.82604e-05	0.000377146	773.753	-0.21303	0.109431	-1.94671	0.0515701	0.320466
ENSDARG00000086826	11	43375326	43388063	sult6b1	.	.	Catalysis of the transfer of a sulfate group from 3'-phosphoadenosine 5'-phosphosulfate to the hydroxyl group of an acceptor, producing the sulfated derivative and 3'-phosphoadenosine 5'-phosphate. [EC:2.8.2, GOC:curators];"Catalysis of the transfer of a group, e.g. a methyl group, glycosyl group, acyl group, phosphorus-containing, or other groups, from one compound (generally regarded as the don…	14	84	1794	1471	1397	1195	817	1070	1511	1146	1401	-2.58496	1303.68	-0.425172	0.13246	-3.20981	0.00132822	0.0163853	1280.82	-0.48961	0.143437	-3.41342	0.000641522	0.00771416	1464.88	-0.366747	0.12923	-2.83793	0.00454074	0.063753
ENSDARG00000002607	11	26476153	26562346	unm_sa1614	un-named sa1614	.	Any process that activates or increases the activity of a GTPase. [GOC:jl, GOC:mah];"Interacting selectively and non-covalently with any metal ion." [GOC:ai];"Binds to and increases the activity of a GTPase, an enzyme that catalyzes the hydrolysis of GTP." [GOC:mah]	7	21	223	275	322	161	170	201	250	247	214	-1.58496	226.542	-0.432238	0.110899	-3.89759	9.71557e-05	0.00210534	221.822	-0.490705	0.150784	-3.25435	0.00113653	0.0122091	255.061	-0.352022	0.1341	-2.62507	0.00866301	0.10065
ENSDARG00000078527	16	29455974	29480335	lingo4b	leucine rich repeat and Ig domain containing 4b	.	The component of a membrane consisting of the gene products and protein complexes having at least some part of their peptide sequence embedded in the hydrophobic region of the membrane. [GOC:dos, GOC:go_curators];"A lipid bilayer along with all the proteins and protein complexes embedded in it an attached to it." [GOC:dos, GOC:mah, ISBN:0815316194]	1	20	205	216	248	120	148	165	208	225	182	-4.32193	188.551	-0.386909	0.12425	-3.11395	0.00184598	0.0209371	181.343	-0.491993	0.159512	-3.08437	0.00203982	0.0193869	214.001	-0.279169	0.136745	-2.04153	0.0411979	0.280677
ENSDARG00000061819	5	20627200	20678300	wscd2	WSC domain containing 2	.	A lipid bilayer along with all the proteins and protein complexes embedded in it an attached to it. [GOC:dos, GOC:mah, ISBN:0815316194];"The component of a membrane consisting of the gene products and protein complexes having at least some part of their peptide sequence embedded in the hydrophobic region of the membrane." [GOC:dos, GOC:go_curators];"Catalysis of the transfer of a sulfate group fr…	5	21	448	461	502	278	293	355	434	461	406	-2.07039	399.719	-0.391747	0.0980524	-3.99528	6.46187e-05	0.00150422	384.732	-0.4939	0.125549	-3.93391	8.35747e-05	0.00139113	452.516	-0.289984	0.111363	-2.60394	0.00921578	0.105656
ENSDARG00000104231	16	17163193	17188294	opn9	opsin 9	.	A lipid bilayer along with all the proteins and protein complexes embedded in it an attached to it. [GOC:dos, GOC:mah, ISBN:0815316194];"The component of a membrane consisting of the gene products and protein complexes having at least some part of their peptide sequence embedded in the hydrophobic region of the membrane." [GOC:dos, GOC:go_curators];"Combining with an extracellular signal and tran…	1	14	160	137	157	86	101	103	121	143	152	-3.80735	127.824	-0.388371	0.141837	-2.73816	0.00617836	0.0508279	122.893	-0.499368	0.179525	-2.7816	0.00540918	0.0423907	145.609	-0.270699	0.156995	-1.72426	0.0846616	0.424851
ENSDARG00000040352	16	28601974	28627568	crot	carnitine O-octanoyltransferase	.	Catalysis of the transfer of an acyl group from one compound (donor) to another (acceptor). [GOC:jl, ISBN:0198506732];"Catalysis of the transfer of a group, e.g. a methyl group, glycosyl group, acyl group, phosphorus-containing, or other groups, from one compound (generally regarded as the donor) to another compound (generally regarded as the acceptor). Transferase is the systematic name for any …	8	29	457	557	654	341	348	394	470	505	499	-1.85798	464.095	-0.422746	0.0978984	-4.31821	1.57299e-05	0.000464556	451.623	-0.499762	0.126391	-3.95408	7.68283e-05	0.00129396	523.586	-0.336772	0.11617	-2.89895	0.00374414	0.0546186
ENSDARG00000010186	24	6161037	6260333	myo3a	.	.	Interacting selectively and non-covalently with a nucleotide, any compound consisting of a nucleoside that is esterified with (ortho)phosphate or an oligophosphate at any hydroxyl group on the ribose or deoxyribose. [GOC:mah, ISBN:0198547684];"Interacting selectively and non-covalently with monomeric or multimeric forms of actin, including actin filaments." [GOC:clt];"Catalysis of the phosphoryla…	3	24	398	513	449	309	254	324	459	389	353	-3	379.035	-0.424962	0.108244	-3.92595	8.63867e-05	0.00191479	369.702	-0.500191	0.133221	-3.7546	0.00017362	0.00258205	427.614	-0.341513	0.125098	-2.72997	0.00633404	0.0810313
ENSDARG00000034504	7	28109364	28148310	lmo1	LIM domain only 1	.	Any process specifically pertinent to the functioning of integrated living units: cells, tissues, organs, and organisms. A process is a collection of molecular events with a defined beginning and end. [GOC:go_curators, GOC:isa_complete];"Interacting selectively and non-covalently with any metal ion." [GOC:ai];"A membrane-bounded organelle of eukaryotic cells in which chromosomes are housed and re…	9	32	356	400	441	225	255	297	396	389	349	-1.83007	340.77	-0.370433	0.110191	-3.36173	0.000774551	0.0107876	324.603	-0.50144	0.134401	-3.73094	0.000190769	0.00278664	388.006	-0.250298	0.115338	-2.17013	0.0299967	0.232063
ENSDARG00000036456	10	41159241	41192881	anxa4	annexin A4	apoptotic process occurs_in liver increased process quality	Interacting selectively and non-covalently with phospholipids, a class of lipids containing phosphoric acid as a mono- or diester, in the presence of calcium. [GOC:jl];"Interacting selectively and non-covalently with calcium ions (Ca2+)." [GOC:ai]	15	74	1514	1352	1196	969	843	837	1135	1135	1070	-2.30256	1114.1	-0.481441	0.111311	-4.3252	1.52392e-05	0.000453731	1112.32	-0.50287	0.135741	-3.70464	0.000211694	0.00303827	1245.75	-0.448058	0.118626	-3.77707	0.000158686	0.00448604
ENSDARG00000013561	6	32010183	32025225	pgm1	phosphoglucomutase 1	.	The chemical reactions and pathways resulting in the formation of glycogen, a polydisperse, highly branched glucan composed of chains of D-glucose residues. [ISBN:0198506732];"Interacting selectively and non-covalently with magnesium (Mg) ions." [GOC:ai];"The chemical reactions and pathways involving an organic substance, any molecular entity containing carbon." [CHEBI:50860, GOC:mah];"The part o…	19	85	2187	2122	2411	1315	1502	1574	1836	1966	1805	-2.16146	1845.74	-0.475303	0.0786458	-6.0436	1.50717e-09	1.98379e-07	1832.29	-0.50341	0.10552	-4.77074	1.83552e-06	4.86947e-05	2064.55	-0.435705	0.0903813	-4.82074	1.43027e-06	8.52767e-05
ENSDARG00000078416	6	840434	957906	zeb2b	zinc finger E-box binding homeobox 2b	embryo development disrupted;dorsal/ventral pattern formation disrupted;post-anal tail morphogenesis disrupted;intrahepatic bile duct decreased length;neural crest cell migration disrupted;posterior-most region part_of pharyngeal arch hypoplastic;convergent extension involved in axis elongation disrupted;radial glial cell part_of hindbrain morphology;mandibular arch skeleton hypoplastic;brain dev…	The formation of mesodermal clusters that are arranged segmentally along the anterior posterior axis of an embryo. [ISBN:0721662544];"A membrane-bounded organelle of eukaryotic cells in which chromosomes are housed and replicated. In most cells, the nucleus contains all of the cell's chromosomes except the organellar chromosomes, and is the site of RNA synthesis and processing. In some species, o…	36	174	876	963	1170	538	699	706	870	1095	898	-2.27302	857.26	-0.35791	0.128145	-2.79301	0.00522203	0.0453747	814.607	-0.503629	0.129406	-3.89185	9.9481e-05	0.00161683	976.881	-0.24139	0.113124	-2.13386	0.0328542	0.245797
ENSDARG00000017794	7	58699718	58718472	sdr16c5b	short chain dehydrogenase/reductase family 16C, member 5b	.	A metabolic process that results in the removal or addition of one or more electrons to or from a substance, with or without the concomitant removal or addition of a proton or protons. [GOC:dhl, GOC:ecd, GOC:jh2, GOC:jid, GOC:mlg, GOC:rph];"Catalysis of an oxidation-reduction (redox) reaction, a reversible chemical reaction in which the oxidation state of an atom or atoms within a molecule is alt…	5	27	1102	923	812	654	563	630	976	832	764	-2.43296	800.877	-0.408455	0.128625	-3.17555	0.00149553	0.0178592	776.219	-0.507532	0.142399	-3.56416	0.00036503	0.004848	907.391	-0.314692	0.132499	-2.37506	0.0175463	0.162926
ENSDARG00000042107	25	17508235	17552299	si:dkey-44k1.5	.	.	A process in which a potassium ion is transported from one side of a membrane to the other. [GOC:mah];"The series of events required for an organism to receive a visual stimulus, convert it to a molecular signal, and recognize and characterize the signal. Visual stimuli are detected in the form of photons and are processed to form an image." [GOC:ai];"Any process that modulates the establishment …	2	22	218	280	318	190	141	190	252	240	224	-3.45943	225.083	-0.431523	0.116054	-3.71829	0.000200579	0.00369658	219.027	-0.512524	0.154663	-3.3138	0.000920362	0.0102585	255.139	-0.336684	0.133676	-2.51867	0.01178	0.124277
ENSDARG00000090634	23	3721041	3744838	smim29	small integral membrane protein 29	.	A lipid bilayer along with all the proteins and protein complexes embedded in it an attached to it. [GOC:dos, GOC:mah, ISBN:0815316194];"The component of a membrane consisting of the gene products and protein complexes having at least some part of their peptide sequence embedded in the hydrophobic region of the membrane." [GOC:dos, GOC:go_curators]	5	20	174	154	167	118	85	112	169	141	128	-2	137.293	-0.425325	0.134574	-3.16053	0.00157481	0.0186865	133.496	-0.512965	0.175433	-2.92399	0.00345571	0.0296624	156.095	-0.321143	0.15268	-2.10338	0.0354326	0.257902
ENSDARG00000020028	9	39026311	39139722	cps1	.	urea cycle disrupted	Interacting selectively and non-covalently with any metal ion. [GOC:ai];"Interacting selectively and non-covalently with a nucleotide, any compound consisting of a nucleoside that is esterified with (ortho)phosphate or an oligophosphate at any hydroxyl group on the ribose or deoxyribose." [GOC:mah, ISBN:0198547684];"All of the contents of a cell excluding the plasma membrane and nucleus, but incl…	1	13	157	192	215	118	115	124	149	198	147	-3.70044	155.481	-0.427313	0.131561	-3.24801	0.00116213	0.0147501	151.306	-0.51566	0.16347	-3.15446	0.00160794	0.0159643	176.42	-0.324723	0.151938	-2.13721	0.0325807	0.244288
ENSDARG00000002771	5	28045764	28109416	si:ch211-48m9.1	.	.	The component of the plasma membrane consisting of the gene products and protein complexes having at least some part of their peptide sequence embedded in the hydrophobic region of the membrane. [GOC:dos, GOC:go_curators];"A lipid bilayer along with all the proteins and protein complexes embedded in it an attached to it." [GOC:dos, GOC:mah, ISBN:0815316194];"Any process that modulates the interna…	1	30	188	278	247	117	161	171	174	244	203	-4.90689	196.134	-0.420269	0.151322	-2.77732	0.00548091	0.0468895	191.066	-0.51589	0.173919	-2.96626	0.00301446	0.0265581	222.772	-0.331605	0.151811	-2.18432	0.0289384	0.226279
ENSDARG00000039272	2	8059957	8111346	pls1	plastin 1 (I isoform)	.	A filamentous structure formed of a two-stranded helical polymer of the protein actin and associated proteins. Actin filaments are a major component of the contractile apparatus of skeletal muscle and the microfilaments of the cytoskeleton of eukaryotic cells. The filaments, comprising polymerized globular actin molecules, appear as flexible structures with a diameter of 5-9 nm. They are organize…	7	16	461	527	460	317	297	319	510	501	426	-1.19265	418.831	-0.340768	0.121303	-2.80923	0.00496602	0.0435226	392.982	-0.51735	0.129159	-4.00552	6.1882e-05	0.00107673	480.661	-0.19346	0.118528	-1.63219	0.102639	0.469551
ENSDARG00000077249	3	52737565	52801302	gmip	GEM interacting protein	.	Binds to and increases the activity of a GTPase, an enzyme that catalyzes the hydrolysis of GTP. [GOC:mah];"Interacting selectively and non-covalently with any metal ion." [GOC:ai];"The process in which a signal is passed on to downstream components within the cell, which become activated themselves to further propagate the signal and finally trigger a change in the function or state of the cell.…	5	19	207	259	243	155	133	164	227	221	170	-1.926	195.518	-0.440597	0.118539	-3.7169	0.000201682	0.00371049	190.915	-0.519369	0.152266	-3.41092	0.000647438	0.00777216	221.548	-0.345597	0.141136	-2.44869	0.0143378	0.14248
ENSDARG00000068242	18	45483282	45519748	cngb1a	.	.	The series of events required for an organism to receive a visual stimulus, convert it to a molecular signal, and recognize and characterize the signal. Visual stimuli are detected in the form of photons and are processed to form an image. [GOC:ai];"Enables the transmembrane transfer of a cation by a channel that opens when intracellular cyclic nucleotide has been bound by the channel complex or …	1	28	187	221	341	157	140	171	191	218	212	-4.80735	201.547	-0.461186	0.139739	-3.30035	0.000965655	0.0127734	198.783	-0.52036	0.173598	-2.99749	0.00272208	0.024533	227.991	-0.380496	0.154738	-2.45896	0.013934	0.139526
ENSDARG00000058039	24	24461341	24463346	bhlhe22	basic helix-loop-helix family, member e22	.	Any process that modulates the frequency, rate or extent of cellular DNA-templated transcription. [GOC:go_curators, GOC:txnOH];"Generation of cells within the nervous system." [GO_REF:0000021, GOC:cls, GOC:curators, GOC:dgh, GOC:dph, GOC:jid, GOC:mtg_15jun06];"Interacting selectively and non-covalently with a specific DNA sequence in order to modulate transcription by RNA polymerase II. The trans…	7	37	542	594	656	372	380	397	580	590	505	-2.4021	506.695	-0.392008	0.10037	-3.90564	9.39747e-05	0.00204375	484.228	-0.523606	0.11631	-4.5018	6.73801e-06	0.00015682	577.504	-0.272242	0.106965	-2.54515	0.0109232	0.118436
ENSDARG00000028336	18	970246	977075	dhdhl	dihydrodiol dehydrogenase (dimeric), like	.	The chemical reactions and pathways resulting in the breakdown of D-xylose, a naturally occurring plant polysaccharide. [ISBN:0198506732];"Catalysis of the reaction: D-xylose + NADP(+) = D-xylono-1,5-lactone + H(+) + NADPH." [EC:1.1.1.179, RHEA:22003];"Catalysis of an oxidation-reduction (redox) reaction, a reversible chemical reaction in which the oxidation state of an atom or atoms within a mol…	8	23	363	358	385	217	239	248	381	305	322	-1.52356	309.925	-0.413952	0.110602	-3.74273	0.000182035	0.00344022	298.556	-0.529017	0.134734	-3.92639	8.62294e-05	0.00142975	352.976	-0.302125	0.122654	-2.46323	0.0137693	0.138473
ENSDARG00000100709	21	11139175	11175010	agxt2	alanine--glyoxylate aminotransferase 2	.	Interacting selectively and non-covalently with pyridoxal 5' phosphate, 3-hydroxy-5-(hydroxymethyl)-2-methyl4-pyridine carboxaldehyde 5' phosphate, the biologically active form of vitamin B6. [GOC:mah, ISBN:0198506732];"Catalysis of a biochemical reaction at physiological temperatures. In biologically catalyzed reactions, the reactants are known as substrates, and the catalysts are naturally occu…	5	37	584	606	639	384	357	433	618	520	600	-2.88753	520.209	-0.381236	0.105211	-3.62355	0.000290591	0.00499806	494.392	-0.529782	0.113751	-4.65738	3.2026e-06	7.98072e-05	594.819	-0.250992	0.109103	-2.3005	0.0214198	0.186705
ENSDARG00000015731	25	35189555	35244242	ano5a	.	.	The formation of a protein dimer, a macromolecular structure consists of two noncovalently associated identical or nonidentical subunits. [ISBN:0198506732];"A lipid bilayer along with all the proteins and protein complexes embedded in it an attached to it." [GOC:dos, GOC:mah, ISBN:0815316194];"The component of a membrane consisting of the gene products and protein complexes having at least some p…	13	51	695	760	650	428	466	445	663	663	629	-1.97199	594.59	-0.402109	0.113358	-3.54724	0.000389283	0.00627414	569.507	-0.533063	0.129876	-4.10439	4.05386e-05	0.00074956	678.841	-0.284753	0.112019	-2.54201	0.0110216	0.118932
ENSDARG00000078050	8	12340247	12403077	phf19	PHD finger protein 19	.	Interacting selectively and non-covalently with any metal ion. [GOC:ai]	3	14	187	211	245	152	120	129	154	208	143	-2.22239	170.836	-0.513565	0.132699	-3.87015	0.000108769	0.00230087	171.569	-0.537745	0.160726	-3.34572	0.000820702	0.00938517	192.171	-0.460938	0.151022	-3.05213	0.00227226	0.0370135
ENSDARG00000027572	1	31706668	31722875	as3mt	arsenite methyltransferase	.	.	5	12	188	222	232	140	125	136	188	189	201	-1.26303	178.077	-0.426354	0.115687	-3.6854	0.000228343	0.00410883	171.544	-0.540908	0.155422	-3.48026	0.000500931	0.00627442	203.58	-0.303792	0.13711	-2.21568	0.0267132	0.214813
ENSDARG00000100560	19	13193215	13286738	zfpm2b	zinc finger protein, FOG family member 2b	.	The cellular synthesis of RNA on a template of DNA. [GOC:jl, GOC:txnOH];"Any process that modulates the frequency, rate or extent of cellular DNA-templated transcription." [GOC:go_curators, GOC:txnOH];"Interacting selectively and non-covalently with any protein or protein complex (a complex of two or more proteins that may include other nonprotein molecules)." [GOC:go_curators];"Interacting selec…	5	30	186	179	210	106	111	142	138	203	137	-2.58496	155.487	-0.47143	0.141566	-3.33011	0.000868121	0.0117754	153.541	-0.541489	0.164401	-3.29371	0.000988743	0.0108564	176.332	-0.38735	0.156766	-2.47087	0.0134783	0.136464
ENSDARG00000101239	8	41688	65189	hsd17b4	hydroxysteroid (17-beta) dehydrogenase 4	trunk curved dorsal;rough endoplasmic reticulum part_of exocrine pancreas absent;pericardium edematous;3'5'-cyclic AMP part_of whole organism decreased amount;yolk increased size;liver decreased size;terminal Schwann cell decreased amount;embryo development disrupted;hemoglobin complex part_of nucleate erythrocyte decreased amount;anterior-most region part_of head decreased size;axonogenesis occu…	Catalysis of an oxidation-reduction (redox) reaction, a reversible chemical reaction in which the oxidation state of an atom or atoms within a molecule is altered. One substrate acts as a hydrogen or electron donor and becomes oxidized, while the other acts as hydrogen or electron acceptor and becomes reduced. [GOC:go_curators];"A metabolic process that results in the removal or addition of one o…	38	89	757	749	696	510	424	465	576	578	516	-1.22781	584.218	-0.56221	0.0924883	-6.07872	1.21147e-09	1.65591e-07	594.794	-0.54159	0.12486	-4.33756	1.44073e-05	0.000307682	652.008	-0.556109	0.112343	-4.9501	7.4174e-07	4.91708e-05
ENSDARG00000002249	18	12655766	12834323	tbxas1	thromboxane A synthase 1 (platelet)	myocardium bent;Z disc part_of cardiac muscle cell shape;pericardium edematous;post-vent region increased curvature	A lipid bilayer along with all the proteins and protein complexes embedded in it an attached to it. [GOC:dos, GOC:mah, ISBN:0815316194];"Catalysis of an oxidation-reduction (redox) reaction in which hydrogen or electrons are transferred from each of two donors, and molecular oxygen is reduced or incorporated into a donor." [GOC:mah];"Interacting selectively and non-covalently with any metal ion."…	1	13	407	397	400	272	212	277	460	330	363	-3.70044	341.887	-0.376959	0.130688	-2.88443	0.00392124	0.0366883	323.708	-0.546152	0.134897	-4.04866	5.15107e-05	0.000919785	393.146	-0.237023	0.129343	-1.83252	0.0668743	0.371981
ENSDARG00000019566	9	44291721	44295071	neurod1	neuronal differentiation 1	photoreceptor outer segment part_of retinal cone cell absent;retinal rod cell part_of retinal outer nuclear layer increased amount;cell part_of retinal inner nuclear layer increased amount;Notch signaling pathway occurs_in retina increased occurrence;mitochondrion part_of retinal cone cell decreased amount;central region part_of retina increased amount;posterior lateral line development disrupted…	The biological process whose specific outcome is the progression of a multicellular organism over time from an initial condition (e.g. a zygote or a young adult) to a later condition (e.g. a multicellular animal or an aged adult). [GOC:dph, GOC:ems, GOC:isa_complete, GOC:tb];"Any process that stops, prevents, or reduces the frequency, rate or extent of the Notch signaling pathway." [GOC:go_curato…	18	192	1470	1644	2115	1015	1125	1139	1286	1862	1585	-3.41504	1453.5	-0.407363	0.130196	-3.12885	0.0017549	0.0202273	1397.27	-0.5469	0.116835	-4.68095	2.85543e-06	7.2081e-05	1659.33	-0.296741	0.126317	-2.34918	0.018815	0.171937
ENSDARG00000100075	23	45906137	45936357	abcg2a	ATP-binding cassette, sub-family G (WHITE), member 2a	.	The component of a membrane consisting of the gene products and protein complexes having at least some part of their peptide sequence embedded in the hydrophobic region of the membrane. [GOC:dos, GOC:go_curators];"Interacting selectively and non-covalently with ATP, adenosine 5'-triphosphate, a universally important coenzyme and enzyme regulator." [ISBN:0198506732];"A lipid bilayer along with all…	2	51	940	655	797	469	512	521	713	662	594	-4.67243	648.685	-0.496289	0.124192	-3.99615	6.43815e-05	0.00150198	644.52	-0.54751	0.146737	-3.73124	0.000190541	0.00278521	733.105	-0.434936	0.132157	-3.29106	0.000998114	0.0195956
ENSDARG00000061101	5	30351233	30380593	snx19a	.	.	The component of a membrane consisting of the gene products and protein complexes having at least some part of their peptide sequence embedded in the hydrophobic region of the membrane. [GOC:dos, GOC:go_curators];"Interacting selectively and non-covalently with any inositol-containing glycerophospholipid, i.e. phosphatidylinositol (PtdIns) and its phosphorylated derivatives." [GOC:bf, ISBN:019850…	1	14	136	136	157	95	76	93	119	126	123	-3.80735	116.691	-0.466309	0.126314	-3.69166	0.000222794	0.00401916	113.927	-0.549091	0.177524	-3.09305	0.00198108	0.0189637	133.299	-0.352412	0.153189	-2.3005	0.02142	0.186705
ENSDARG00000062096	23	17993791	18017946	pm20d1.2	peptidase M20 domain containing 1, tandem duplicate 2	.	The space external to the outermost structure of a cell. For cells without external protective or external encapsulating structures this refers to space outside of the plasma membrane. This term covers the host cell environment outside an intracellular parasite. [GOC:go_curators];"The chemical reactions and pathways, including anabolism and catabolism, by which living organisms transform chemical…	3	12	431	435	526	304	263	302	374	404	369	-2	375.373	-0.508269	0.0881074	-5.76874	7.98651e-09	8.60083e-07	371.698	-0.558722	0.125393	-4.45578	8.35894e-06	0.00019011	424.816	-0.435118	0.114928	-3.78601	0.000153083	0.00435216
ENSDARG00000089458	17	5768608	5822120	rp1l1a	retinitis pigmentosa 1-like 1a	convergent extension decreased process quality;retina decreased distribution;eye decreased size	The process whose specific outcome is the progression of the cerebellum over time, from its formation to the mature structure. The cerebellum is the portion of the brain in the back of the head between the cerebrum and the pons. In mice, the cerebellum controls balance for walking and standing, modulates the force and range of movement and is involved in the learning of motor skills. [GO_REF:0000…	1	15	710	808	879	467	454	584	806	743	741	-3.90689	677.764	-0.387099	0.108822	-3.55717	0.000374875	0.00609722	640.68	-0.559235	0.112789	-4.95822	7.11409e-07	2.07837e-05	780.077	-0.244511	0.0989772	-2.47038	0.0134969	0.136549
ENSDARG00000061201	12	26497167	26538823	acsf2	acyl-CoA synthetase family member 2	.	Catalysis of a biochemical reaction at physiological temperatures. In biologically catalyzed reactions, the reactants are known as substrates, and the catalysts are naturally occurring macromolecular substances known as enzymes. Enzymes possess specific binding sites for substrates, and are usually composed wholly or largely of protein, but RNA that has catalytic activity (ribozyme) is often also…	15	43	707	807	829	472	527	455	661	829	703	-1.51937	658.36	-0.396619	0.125584	-3.1582	0.00158749	0.0188056	626.327	-0.559939	0.125232	-4.47121	7.77791e-06	0.000179186	756.416	-0.267643	0.11134	-2.40383	0.0162241	0.154483
ENSDARG00000003290	2	1522721	1569250	dab1b	Dab, reelin signal transducer, homolog 1b (Drosophila)	.	The actions of a single gene product or complex at the molecular level consisting of a single biochemical activity or multiple causally linked biochemical activities. A given gene product may exhibit one or more molecular functions. [GOC:go_curators];"The part of a cell, extracellular environment or virus in which a gene product is located. A gene product may be located in one or more parts of a …	2	17	135	154	181	71	94	119	131	168	119	-3.08746	128.407	-0.426067	0.156843	-2.71652	0.00659729	0.0533665	123.591	-0.563202	0.186587	-3.01845	0.00254071	0.0231878	147.991	-0.302171	0.157328	-1.92065	0.0547762	0.331872
ENSDARG00000076980	12	13742778	13789973	ppp1r16a	protein phosphatase 1, regulatory subunit 16A	.	.	3	12	244	307	290	179	152	189	295	261	261	-2	238.303	-0.373271	0.126701	-2.94608	0.00321832	0.0317562	223.647	-0.564045	0.145898	-3.86601	0.000110629	0.00177372	275.909	-0.213073	0.128413	-1.65929	0.097058	0.456089
ENSDARG00000058803	1	245076	258138	grk1a	G protein-coupled receptor kinase 1 a	.	The process of introducing a phosphate group on to a protein. [GOC:hb];"The cellular process in which a signal is conveyed to trigger a change in the activity or state of a cell. Signal transduction begins with reception of a signal (e.g. a ligand binding to a receptor or receptor activation by a stimulus such as light), or for signal transduction in the absence of ligand, signal-withdrawal or th…	2	50	393	437	594	268	286	322	330	358	386	-4.64386	371.972	-0.562367	0.11045	-5.09159	3.5508e-07	2.00832e-05	376.911	-0.56499	0.139794	-4.04158	5.30917e-05	0.000946433	418.106	-0.530539	0.130039	-4.07983	4.50685e-05	0.00156114
ENSDARG00000088634	2	136346	155270	adcy1b	.	anterior-posterior axis part_of whole organism curved;auditory receptor cell decreased functionality;eye decreased size;response to auditory stimulus disrupted;anterior region part_of hindbrain decreased size	Catalysis of the reaction: GTP = 3',5'-cyclic GMP + diphosphate. [EC:4.6.1.2];"The chemical reactions and pathways resulting in the formation of the nucleotide cAMP (cyclic AMP, adenosine 3',5'-cyclophosphate)." [ISBN:0198506732];"A lipid bilayer along with all the proteins and protein complexes embedded in it an attached to it." [GOC:dos, GOC:mah, ISBN:0815316194];"Complex that possesses guanyla…	1	21	261	368	326	194	182	212	321	336	266	-4.39232	269.805	-0.373799	0.135482	-2.75902	0.00579744	0.0485923	253.541	-0.56642	0.147252	-3.84661	0.000119765	0.00190092	312.348	-0.216428	0.134504	-1.60908	0.107599	0.481311
ENSDARG00000029476	3	19299309	19323689	ldlra	low density lipoprotein receptor a	cholesterol homeostasis process quality;posterior cardinal vein fatty;vascular endothelium part_of posterior cardinal vein increased permeability;liver increased size;liver fatty	Combining with a low-density lipoprotein particle and delivering the low-density lipoprotein into the cell via endocytosis. [GOC:bf, ISBN:0198506732];"A receptor-mediated endocytosis process involved in intracellular cholesterol transport." [GOC:ascb_2009, GOC:dph, GOC:pr, GOC:tb];"A lipid bilayer along with all the proteins and protein complexes embedded in it an attached to it." [GOC:dos, GOC:m…	2	69	1407	1768	1625	1060	829	1103	1493	1505	1620	-5.10852	1359.16	-0.383669	0.119174	-3.21941	0.00128453	0.0159895	1280.28	-0.572878	0.111477	-5.13899	2.76219e-07	8.77818e-06	1569.57	-0.234598	0.100923	-2.32451	0.020098	0.179659
ENSDARG00000018750	16	28908478	28991376	npr1b	.	.	Complex that possesses guanylate cyclase activity and is not bound to a membrane. [GOC:mah];"A lipid bilayer along with all the proteins and protein complexes embedded in it an attached to it." [GOC:dos, GOC:mah, ISBN:0815316194];"Interacting selectively and non-covalently with ATP, adenosine 5'-triphosphate, a universally important coenzyme and enzyme regulator." [ISBN:0198506732];"The living co…	7	23	331	359	386	221	191	253	330	338	273	-1.71621	294.446	-0.465113	0.105679	-4.4012	1.07653e-05	0.000341081	285.964	-0.573518	0.133136	-4.30777	1.64906e-05	0.000344256	336.833	-0.354121	0.12242	-2.89268	0.00381972	0.0554124
ENSDARG00000016570	21	11105007	11135942	prlra	prolactin receptor a	anterior-most region part_of head decreased size;eye decreased size	Combining with prolactin and transmitting the signal from one side of the membrane to the other to initiate a change in cell activity. [GOC:mah, GOC:signaling];"Combining with a cytokine and transmitting the signal from one side of the membrane to the other to initiate a change in cell activity." [GOC:add, GOC:mah];"A series of molecular signals initiated by the binding of the peptide hormone pro…	6	18	1166	1174	1186	712	655	829	1308	1131	1099	-1.58496	1013.29	-0.354778	0.123166	-2.88049	0.00397054	0.0370358	942.187	-0.578705	0.105275	-5.49705	3.86186e-08	1.45972e-06	1176.2	-0.184024	0.0994826	-1.84981	0.0643412	0.363852
ENSDARG00000075748	11	141504	159328	NCKAP1L	.	.	.	5	22	127	130	105	54	86	72	117	101	99	-2.1375	98.3283	-0.449817	0.16743	-2.68661	0.00721818	0.0572381	95.1071	-0.580413	0.209579	-2.76942	0.00561559	0.0435938	113.891	-0.321349	0.166503	-1.92999	0.0536086	0.327977
ENSDARG00000031768	25	33849647	33969717	roraa	RAR-related orphan receptor A, paralog a	.	Combining with a signal and transmitting the signal to the transcriptional machinery by interacting selectively and non-covalently with a specific DNA sequence in order to modulate transcription by RNA polymerase II. [GOC:signaling, GOC:txnOH];"Interacting selectively and non-covalently with zinc (Zn) ions." [GOC:ai];"Any process that increases the frequency, rate or extent of gene expression. Ge…	23	125	1751	1855	2083	1001	1045	1476	1914	1846	1586	-2.44222	1592.88	-0.405862	0.12176	-3.3333	0.000858218	0.0116559	1511.31	-0.581241	0.118101	-4.92158	8.58501e-07	2.44782e-05	1837.82	-0.270959	0.092962	-2.91473	0.00355995	0.0525538
ENSDARG00000054911	21	26389391	26393520	tmsb	thymosin, beta	.	A process that is carried out at the cellular level which results in the assembly, arrangement of constituent parts, or disassembly of cytoskeletal structures comprising actin filaments. Includes processes that control the spatial distribution of actin filaments, such as organizing filaments into meshworks, bundles, or other structures, as by cross-linking. [GOC:mah];"Any of the various filamento…	2	26	259	229	292	177	140	156	243	211	190	-3.70044	208.869	-0.510425	0.119048	-4.28757	1.80639e-05	0.000522781	206.192	-0.583038	0.155005	-3.76143	0.000168948	0.00252842	238.302	-0.417947	0.137494	-3.03973	0.00236788	0.038185
ENSDARG00000036481	5	26795465	26806100	tcn2	transcobalamin II	.	Interacting selectively and non-covalently with cobalamin (vitamin B12), a water-soluble vitamin characterized by possession of a corrin nucleus containing a cobalt atom. [GOC:mah];"The directed movement of cobalamin (vitamin B12), a water-soluble vitamin characterized by possession of a corrin nucleus containing a cobalt atom, into, out of or within a cell, or between cells, by means of some age…	2	38	731	798	908	407	534	545	718	775	695	-4.24793	671.089	-0.44306	0.118287	-3.74563	0.000179945	0.00341034	645.332	-0.584652	0.129926	-4.49987	6.79937e-06	0.000157834	771.456	-0.327252	0.101364	-3.22849	0.00124444	0.0235063
ENSDARG00000091836	12	30569621	30583668	casp7	caspase 7, apoptosis-related cysteine peptidase	.	Catalysis of the hydrolysis of various bonds, e.g. C-O, C-N, C-C, phosphoric anhydride bonds, etc. Hydrolase is the systematic name for any enzyme of EC class 3. [ISBN:0198506732];"A stage of the apoptotic process that starts with the controlled breakdown of the cell through the action of effector caspases or other effector molecules (e.g. cathepsins, calpains etc.). Key steps of the execution ph…	5	24	459	402	452	264	258	280	435	448	431	-2.26303	375.784	-0.359267	0.132086	-2.71995	0.0065292	0.0530572	348.871	-0.589561	0.132619	-4.44553	8.76752e-06	0.000198557	437.934	-0.181492	0.117541	-1.54407	0.122571	0.511174
ENSDARG00000029011	22	27092469	27115241	xpnpep1	X-prolyl aminopeptidase (aminopeptidase P) 1, soluble	.	Catalysis of the hydrolysis of N-terminal amino acid residues from a polypeptide chain by a mechanism in which water acts as a nucleophile, one or two metal ions hold the water molecule in place, and charged amino acid side chains are ligands for the metal ions. [GOC:mah, http://merops.sanger.ac.uk/about/glossary.htm#AMINOPEPTIDASE, http://merops.sanger.ac.uk/about/glossary.htm#CATTYPE];"The part…	23	58	854	816	760	526	494	453	752	650	636	-1.33442	656.27	-0.509388	0.112547	-4.526	6.01116e-06	0.00021187	645.638	-0.59834	0.13247	-4.51679	6.27839e-06	0.00014718	749.928	-0.42213	0.114427	-3.68909	0.00022506	0.00591537
ENSDARG00000099154	KN149764.1	4168	17479	CABZ01032488.1	.	.	Catalysis of an oxidation-reduction (redox) reaction in which an aldehyde or ketone (oxo) group acts as a hydrogen or electron donor and reduces NAD or NADP. [GOC:jl];"Catalysis of an oxidation-reduction (redox) reaction, a reversible chemical reaction in which the oxidation state of an atom or atoms within a molecule is altered. One substrate acts as a hydrogen or electron donor and becomes oxid…	5	13	301	304	354	174	189	215	215	279	231	-1.37851	249.837	-0.582624	0.108961	-5.3471	8.93744e-08	6.43828e-06	252.695	-0.599932	0.140372	-4.27386	1.92117e-05	0.000392993	282.784	-0.531576	0.133183	-3.99133	6.57032e-05	0.00213057
ENSDARG00000003869	16	36748538	36760156	decr1	2,4-dienoyl CoA reductase 1, mitochondrial	.	.	11	31	286	331	296	176	192	178	282	270	268	-1.49476	250.728	-0.454529	0.121975	-3.72642	0.000194219	0.00361688	240.771	-0.603552	0.148838	-4.0551	5.01129e-05	0.000898582	289.73	-0.318481	0.12652	-2.51724	0.0118278	0.124628
ENSDARG00000070726	6	38791900	38818582	cnga3a	cyclic nucleotide gated channel alpha 3a	.	Enables the transmembrane transfer of a calcium ion by a channel that opens when a ryanodine class ligand has been bound by the channel complex or one of its constituent parts. [GOC:dph, GOC:tb];"Enables the transmembrane transfer of a potassium ion by a voltage-gated channel. A voltage-gated channel is a channel whose open state is dependent on the voltage across the membrane in which it is embe…	1	14	468	676	564	251	384	376	499	599	429	-3.80735	466.226	-0.435851	0.156758	-2.78041	0.00542911	0.0466556	447.541	-0.604166	0.162856	-3.70982	0.000207406	0.00298474	539.784	-0.317115	0.133923	-2.36789	0.0178897	0.165454
ENSDARG00000043226	1	51896147	52086496	nfixa	nuclear factor 1 X-type-like	cell part_of whole organism dead;myofibril part_of skeletal muscle disorganized;whole organism decreased mobility;skeletal muscle fiber development disrupted;thigmotaxis decreased process quality;swimming decreased process quality;cardiac muscle cell proliferation increased occurrence;migratory slow muscle precursor cell decreased amount;muscle has fewer parts of type GO:0016529;swimming behavior…	The developmental sequence of events leading to the formation of adult skeletal muscle tissue. The main events are: the fusion of myoblasts to form myotubes that increase in size by further fusion to them of myoblasts, the formation of myofibrils within their cytoplasm and the establishment of functional neuromuscular junctions with motor neurons. At this stage they can be regarded as mature musc…	6	61	82	110	128	55	60	69	75	108	86	-3.34577	84.7471	-0.482105	0.161947	-2.97693	0.00291154	0.0296055	82.4676	-0.604307	0.203061	-2.97599	0.00292045	0.0258901	98.2294	-0.34208	0.175893	-1.94481	0.0517973	0.32121
ENSDARG00000008861	19	47429722	47456787	tfap2e	transcription factor AP-2 epsilon	.	A membrane-bounded organelle of eukaryotic cells in which chromosomes are housed and replicated. In most cells, the nucleus contains all of the cell's chromosomes except the organellar chromosomes, and is the site of RNA synthesis and processing. In some species, or in specialized cell types, RNA metabolism or DNA replication may be absent. [GOC:go_curators];"Interacting selectively and non-coval…	2	29	89	112	147	52	78	67	117	99	88	-3.85798	92.9395	-0.451474	0.170506	-2.64784	0.00810073	0.0625614	89.3337	-0.606775	0.210155	-2.88727	0.00388603	0.0325196	108.344	-0.307193	0.170289	-1.80396	0.0712382	0.384415
ENSDARG00000033498	5	25366677	25406807	rorb	.	.	A series of molecular signals mediated by a steroid hormone binding to a receptor. [PMID:12606724];"Interacting selectively and non-covalently with a specific DNA sequence (sometimes referred to as a motif) within the regulatory region of a gene in order to modulate transcription." [GOC:curators, GOC:txnOH];"Interacting selectively and non-covalently with zinc (Zn) ions." [GOC:ai];"Combining with…	8	34	371	383	414	222	243	229	322	326	254	-2.08746	305.309	-0.580524	0.103837	-5.59072	2.26127e-08	2.00905e-06	306.871	-0.618931	0.135188	-4.5783	4.68781e-06	0.00011236	347.281	-0.517137	0.12411	-4.16675	3.08975e-05	0.0011375
ENSDARG00000027424	4	16844973	16853474	slc25a3a	solute carrier family 25 (mitochondrial carrier; phosphate carrier), member 3a	.	Transport of substances into, out of or within a mitochondrion. [GOC:ai];"The inner, i.e. lumen-facing, lipid bilayer of the mitochondrial envelope. It is highly folded to form cristae." [GOC:ai];"Enables the transfer of phosphate (PO4 3-) ions from one side of a membrane to the other." [GOC:ai];"The component of a membrane consisting of the gene products and protein complexes having at least som…	3	40	451	516	526	311	305	270	479	492	489	-3.73697	420.656	-0.384158	0.135038	-2.84482	0.00444367	0.0403373	392.03	-0.618974	0.132984	-4.65451	3.24748e-06	8.08312e-05	491.674	-0.210586	0.108652	-1.93816	0.0526032	0.324002
ENSDARG00000006892	9	3699397	3866707	myo3b	.	.	A protein complex, formed of one or more myosin heavy chains plus associated light chains and other proteins, that functions as a molecular motor; uses the energy of ATP hydrolysis to move actin filaments or to move vesicles or other cargo on fixed actin filaments; has magnesium-ATPase activity and binds actin. Myosin classes are distinguished based on sequence features of the motor, or head, dom…	1	21	368	455	468	250	246	271	293	403	307	-4.39232	337.471	-0.567207	0.113429	-5.00055	5.71657e-07	2.9658e-05	338.041	-0.623077	0.129154	-4.8243	1.40494e-06	3.82703e-05	384.474	-0.49531	0.132735	-3.73156	0.000190298	0.0052138
ENSDARG00000014320	3	3765831	3798755	gucy2c	.	.	Catalysis of the phosphorylation of an amino acid residue in a protein, usually according to the reaction: a protein + ATP = a phosphoprotein + ADP. [MetaCyc:PROTEIN-KINASE-RXN];"Interacting selectively and non-covalently with a nucleotide, any compound consisting of a nucleoside that is esterified with (ortho)phosphate or an oligophosphate at any hydroxyl group on the ribose or deoxyribose." [GO…	1	26	351	296	361	194	202	197	316	325	321	-4.70044	281.222	-0.410238	0.136375	-3.00816	0.00262833	0.0274187	264.046	-0.628592	0.146496	-4.29084	1.78001e-05	0.000369068	328.791	-0.23917	0.126225	-1.89479	0.0581205	0.342574
ENSDARG00000010267	2	19824190	20120904	dpydb	.	.	Interacting selectively and non-covalently with a 4 iron, 4 sulfur (4Fe-4S) cluster; this cluster consists of four iron atoms, with the inorganic sulfur atoms found between the irons and acting as bridging ligands. [GOC:ai, PMID:15952888, Wikipedia:Iron-sulfur_cluster];"Catalysis of an oxidation-reduction (redox) reaction, a reversible chemical reaction in which the oxidation state of an atom or …	5	56	1406	1550	1754	845	943	1006	1407	1396	1335	-3.48543	1278.07	-0.486662	0.100804	-4.82779	1.38057e-06	6.15854e-05	1233.19	-0.635258	0.105562	-6.01785	1.76752e-09	8.79887e-08	1476.72	-0.36186	0.0896891	-4.0346	5.46942e-05	0.00182221
ENSDARG00000029689	11	36989696	37035835	tkta	transketolase a	.	Catalysis of a biochemical reaction at physiological temperatures. In biologically catalyzed reactions, the reactants are known as substrates, and the catalysts are naturally occurring macromolecular substances known as enzymes. Enzymes possess specific binding sites for substrates, and are usually composed wholly or largely of protein, but RNA that has catalytic activity (ribozyme) is often also…	1	158	3250	3064	3606	1904	1758	2242	2863	2830	2560	-7.30378	2648.08	-0.54	0.08558	-6.30989	2.79243e-10	4.68842e-08	2600.45	-0.643515	0.0967108	-6.65402	2.852e-11	1.96475e-09	3042.64	-0.440948	0.0895428	-4.92444	8.46006e-07	5.47757e-05
ENSDARG00000103543	12	3249054	3252263	gngt2b	guanine nucleotide binding protein (G protein), gamma transducing activity polypeptide 2b	.	A lipid bilayer along with all the proteins and protein complexes embedded in it an attached to it. [GOC:dos, GOC:mah, ISBN:0815316194];"The cellular process in which a signal is conveyed to trigger a change in the activity or state of a cell. Signal transduction begins with reception of a signal (e.g. a ligand binding to a receptor or receptor activation by a stimulus such as light), or for sign…	1	488	4557	4879	5270	2801	2911	2969	4024	4586	4478	-8.93074	4007.86	-0.478418	0.1062	-4.50488	6.64111e-06	0.000230536	3848.97	-0.648316	0.0914203	-7.0916	1.32567e-12	1.06433e-10	4644.13	-0.344214	0.0904803	-3.8043	0.000142207	0.00413742
ENSDARG00000102744	20	48588679	48604653	mgst3a	microsomal glutathione S-transferase 3a	.	The double lipid bilayer enclosing the nucleus and separating its contents from the rest of the cytoplasm; includes the intermembrane space, a gap of width 20-40 nm (also called the perinuclear space). [ISBN:0198547684];"Catalysis of the reaction: R-X + glutathione = H-X + R-S-glutathione. R may be an aliphatic, aromatic or heterocyclic group; X may be a sulfate, nitrile or halide group." [EC:2.5…	5	22	696	676	694	399	409	404	593	649	569	-2.1375	560.137	-0.494302	0.11093	-4.45596	8.35185e-06	0.000276962	540.761	-0.648418	0.120508	-5.38069	7.42028e-08	2.68134e-06	649.077	-0.362169	0.108342	-3.34283	0.000829281	0.0168986
ENSDARG00000025350	1	51721851	51729862	prdx2	peroxiredoxin 2	.	A metabolic process that results in the removal or addition of one or more electrons to or from a substance, with or without the concomitant removal or addition of a proton or protons. [GOC:dhl, GOC:ecd, GOC:jh2, GOC:jid, GOC:mlg, GOC:rph];"Any process that maintains the redox environment of a cell or compartment within a cell." [GOC:ai, GOC:dph, GOC:tb];"The basic structural and functional unit …	31	137	4496	4283	4442	2682	2564	2551	3766	3764	3223	-2.14384	3506.01	-0.560429	0.091155	-6.14809	7.84227e-10	1.1148e-07	3467.72	-0.649711	0.102366	-6.34692	2.19664e-10	1.28877e-08	4022.88	-0.473519	0.0944975	-5.01092	5.41699e-07	3.75745e-05
ENSDARG00000055455	14	36348549	36378494	gpm6aa	glycoprotein M6Aa	.	The component of a membrane consisting of the gene products and protein complexes having at least some part of their peptide sequence embedded in the hydrophobic region of the membrane. [GOC:dos, GOC:go_curators];"A lipid bilayer along with all the proteins and protein complexes embedded in it an attached to it." [GOC:dos, GOC:mah, ISBN:0815316194]	3	45	2146	2026	2567	1322	1232	1416	2245	2410	2070	-3.90689	1904.43	-0.378086	0.133615	-2.82968	0.00465952	0.0416177	1759.38	-0.650642	0.100004	-6.50617	7.70915e-11	4.8999e-09	2238.47	-0.186031	0.0976299	-1.90547	0.0567191	0.338496
ENSDARG00000095614	2	1001560	1117886	cacna1eb	calcium channel, voltage-dependent, R type, alpha 1E subunit b	.	Enables the facilitated diffusion of an ion (by an energy-independent process) by passage through a transmembrane aqueous pore or channel without evidence for a carrier-mediated mechanism. May be either selective (it enables passage of a specific ion only) or non-selective (it enables passage of two or more ions of same charge but different size). [GOC:cy, GOC:mtg_transport, GOC:pr, ISBN:08153407…	3	37	234	277	335	150	152	185	251	295	256	-3.62449	233.112	-0.416014	0.142624	-2.91685	0.00353582	0.0340227	218.238	-0.651919	0.150859	-4.32139	1.55049e-05	0.000326046	273.955	-0.236471	0.13362	-1.76973	0.0767723	0.401154
ENSDARG00000079397	9	44094311	44289636	cerkl	ceramide kinase-like	eye decreased size;anterior-most region part_of head decreased size;photoreceptor outer segment part_of retinal cone cell degenerate;retinal rod cell decreased amount;photoreceptor outer segment part_of photoreceptor cell decreased length;retina layer formation disrupted;regulation of apoptotic cell clearance occurs_in retina process quality;apoptotic process occurs_in retinal photoreceptor layer…	The part of the cytoplasm that does not contain organelles but which does contain other particulate matter, such as protein complexes. [GOC:hjd, GOC:jl];"Any process that modulates the frequency, rate or extent of apoptotic cell clearance." [GOC:obol];"The chemical reactions and pathways, including anabolism and catabolism, by which living organisms transform chemical substances. Metabolic proces…	3	11	62	63	80	25	34	50	43	59	57	-1.87447	51.9238	-0.550302	0.184811	-2.97765	0.00290467	0.029578	51.3152	-0.656067	0.238028	-2.75626	0.00584668	0.0449466	61.0317	-0.404501	0.19008	-2.12805	0.0333326	0.248135
ENSDARG00000112308	5	833599	833933	BX537263.2	.	.	.	386	1887	7	5	18	1	0	4	0	5	2	-2.28942	4.58553	-0.58869	0.199958	-2.94407	0.00323926	0.0319181	5.51498	-0.657545	0.270548	-2.43042	0.0150815	0.0914221	6.30405	-0.408825	0.17142	-2.38494	0.0170821	0.159963
ENSDARG00000091834	3	38705425	38745598	si:ch211-198m17.1	si:ch211-198m17.1	.	A lipid bilayer along with all the proteins and protein complexes embedded in it an attached to it. [GOC:dos, GOC:mah, ISBN:0815316194];"The component of a membrane consisting of the gene products and protein complexes having at least some part of their peptide sequence embedded in the hydrophobic region of the membrane." [GOC:dos, GOC:go_curators];"The aggregation, arrangement and bonding togeth…	7	41	867	812	701	427	408	556	670	791	651	-2.5502	647.164	-0.481681	0.13568	-3.55014	0.000385029	0.00622439	621.959	-0.65885	0.138706	-4.74999	2.03424e-06	5.337e-05	753.791	-0.341241	0.126193	-2.70412	0.00684854	0.0853078
ENSDARG00000054641	23	40275400	40286059	fam46ab	family with sequence similarity 46, member Ab	.	Any process specifically pertinent to the functioning of integrated living units: cells, tissues, organs, and organisms. A process is a collection of molecular events with a defined beginning and end. [GOC:go_curators, GOC:isa_complete];"The actions of a single gene product or complex at the molecular level consisting of a single biochemical activity or multiple causally linked biochemical activi…	3	12	736	796	1007	398	496	570	606	708	745	-2	666.349	-0.545137	0.124001	-4.39622	1.10151e-05	0.000346936	656.122	-0.659948	0.133414	-4.94664	7.55072e-07	2.17277e-05	769.079	-0.449159	0.117111	-3.83534	0.000125389	0.00370472
ENSDARG00000104702	25	7492663	7504554	cat	catalase	.	Any process carried out at the cellular level that reduces or removes the toxicity superoxide radicals or hydrogen peroxide. [GOC:dos, GOC:vw];"Any process that results in a change in state or activity of a cell or an organism (in terms of movement, secretion, enzyme production, gene expression, etc.) as a result of oxidative stress, a state often resulting from exposure to high levels of reactiv…	2	55	1497	1454	1797	830	1014	893	1253	1275	1265	-4.78136	1243.7	-0.570739	0.105141	-5.42833	5.68829e-08	4.37875e-06	1232.47	-0.661104	0.123377	-5.35839	8.39647e-08	2.98858e-06	1430.91	-0.489875	0.0950888	-5.15176	2.58051e-07	2.0322e-05
ENSDARG00000070929	6	26557979	26559921	sox14	SRY (sex determining region Y)-box 14	hypothalamus development disrupted	Any molecular function by which a gene product interacts selectively and non-covalently with DNA (deoxyribonucleic acid). [GOC:dph, GOC:jl, GOC:tb, GOC:vw];"A membrane-bounded organelle of eukaryotic cells in which chromosomes are housed and replicated. In most cells, the nucleus contains all of the cell's chromosomes except the organellar chromosomes, and is the site of RNA synthesis and process…	3	24	155	208	222	97	118	112	137	184	156	-3	152.669	-0.538282	0.144467	-3.72598	0.000194558	0.00361688	149.631	-0.667606	0.173189	-3.85478	0.000115836	0.00184749	177.489	-0.409798	0.152779	-2.68229	0.0073121	0.0885399
ENSDARG00000099313	4	982028	992148	naga	N-acetylgalactosaminidase, alpha	.	Catalysis of a biochemical reaction at physiological temperatures. In biologically catalyzed reactions, the reactants are known as substrates, and the catalysts are naturally occurring macromolecular substances known as enzymes. Enzymes possess specific binding sites for substrates, and are usually composed wholly or largely of protein, but RNA that has catalytic activity (ribozyme) is often also…	18	42	560	477	491	294	278	307	416	366	400	-1.22239	396.873	-0.606336	0.106478	-5.69446	1.23763e-08	1.23318e-06	397.317	-0.673212	0.136101	-4.94641	7.55932e-07	2.17277e-05	456.474	-0.519203	0.124823	-4.15951	3.18934e-05	0.00117006
ENSDARG00000035652	5	4332220	4342866	sat1a.1	spermidine/spermine N1-acetyltransferase 1a, duplicate 1	.	The chemical reactions and pathways resulting in the breakdown of spermine, a polybasic amine found in human sperm, in ribosomes and in some viruses and involved in nucleic acid packaging. [CHEBI:15746, GOC:curators];"The part of a cell, extracellular environment or virus in which a gene product is located. A gene product may be located in one or more parts of a cell and its location may be as sp…	18	40	963	968	1083	567	531	646	883	814	695	-1.152	787.066	-0.590531	0.0878203	-6.72431	1.76426e-11	4.27638e-09	781.802	-0.677659	0.104058	-6.51234	7.39912e-11	4.73101e-09	905.986	-0.497602	0.103776	-4.79497	1.627e-06	9.52023e-05
ENSDARG00000038018	12	34896956	34901874	prph2a	peripherin 2a (retinal degeneration, slow)	.	The series of events required for an organism to receive a visual stimulus, convert it to a molecular signal, and recognize and characterize the signal. Visual stimuli are detected in the form of photons and are processed to form an image. [GOC:ai];"A series of molecular signals initiated by activation of a receptor on the surface of a cell. The pathway begins with binding of an extracellular lig…	1	55	2684	2945	3009	1482	1709	1758	2425	2770	2490	-5.78136	2335.89	-0.491629	0.117085	-4.1989	2.68212e-05	0.000730407	2235.97	-0.686718	0.1033	-6.64778	2.97554e-11	2.04327e-09	2727.82	-0.346248	0.0912146	-3.79596	0.000147071	0.00424358
ENSDARG00000004687	24	20325312	20332460	acaa1	acetyl-CoA acyltransferase 1	.	Catalysis of the transfer of an acyl group from one compound (donor) to another (acceptor). [GOC:jl, ISBN:0198506732];"Catalysis of the transfer of a group, e.g. a methyl group, glycosyl group, acyl group, phosphorus-containing, or other groups, from one compound (generally regarded as the donor) to another compound (generally regarded as the acceptor). Transferase is the systematic name for any …	1	11	538	529	597	314	312	319	448	469	482	-3.45943	441.023	-0.544788	0.105612	-5.1584	2.49068e-07	1.50632e-05	429.365	-0.69077	0.121436	-5.68834	1.2828e-08	5.42484e-07	512.982	-0.413273	0.109992	-3.75731	0.000171748	0.00479704
ENSDARG00000104108	4	77389668	77432218	slco1d1	solute carrier organic anion transporter family, member 1D1	.	The directed movement of a microcystin into, out of or within a cell, or between cells, by means of some agent such as a transporter or pore. [GO_REF:0000065, GOC:TermGenie, PMID:26055554];"The membrane surrounding a cell that separates the cell from its external environment. It consists of a phospholipid bilayer and associated proteins." [ISBN:0716731363];"The process in which a solute is transp…	26	63	1052	1217	1457	516	708	859	1039	1399	1166	-1.27684	1026.89	-0.400759	0.164467	-2.43671	0.0148214	0.095653	951.018	-0.696864	0.143678	-4.85016	1.23359e-06	3.39492e-05	1218.62	-0.21576	0.118145	-1.82623	0.067815	0.374455
ENSDARG00000056979	22	23238790	23253481	lhx9	LIM homeobox 9	hypocretin-secreting neuron decreased amount	The process in which the thalamus changes over time, from its initial formation to its mature state. [GO_REF:0000021, GOC:cls, GOC:dgh, GOC:dph, GOC:jid, GOC:mtg_15jun06];"Interacting selectively and non-covalently with DNA of a specific nucleotide composition, e.g. GC-rich DNA binding, or with a specific sequence motif or type of DNA e.g. promotor binding or rDNA binding." [GOC:jl];"Interacting …	11	53	727	721	790	430	377	465	572	701	534	-2.26849	585.149	-0.578237	0.106659	-5.42136	5.91462e-08	4.52034e-06	576.824	-0.700315	0.111464	-6.28286	3.32394e-10	1.88292e-08	678.247	-0.465347	0.115341	-4.03452	5.4715e-05	0.00182221
ENSDARG00000012667	20	47686629	47704973	tfap2b	.	.	Any process that modulates the frequency, rate or extent of cellular DNA-templated transcription. [GOC:go_curators, GOC:txnOH];"Interacting selectively and non-covalently with a specific DNA sequence (sometimes referred to as a motif) within the regulatory region of a gene in order to modulate transcription." [GOC:curators, GOC:txnOH];"The process whose specific outcome is the progression of a ca…	7	75	581	684	768	285	425	412	469	598	465	-3.42146	516.564	-0.614038	0.135076	-4.54588	5.47072e-06	0.000198051	517.996	-0.705251	0.148262	-4.75679	1.96692e-06	5.17948e-05	597.621	-0.546737	0.120202	-4.54847	5.40371e-06	0.000273423
ENSDARG00000062510	17	18117029	18180747	bcl11ba	B cell CLL/lymphoma 11Ba	.	The synthesis of RNA from a DNA template by RNA polymerase II, originating at an RNA polymerase II promoter. Includes transcription of messenger RNA (mRNA) and certain small nuclear RNAs (snRNAs). [GOC:jl, GOC:txnOH, ISBN:0321000382];"Any process that activates or increases the frequency, rate or extent of transcription from an RNA polymerase II promoter." [GOC:go_curators, GOC:txnOH];"Interactin…	8	182	559	727	872	372	390	439	557	686	554	-4.50779	564.887	-0.541052	0.128118	-4.22308	2.40983e-05	0.000667336	549.417	-0.70539	0.131743	-5.35428	8.58967e-08	3.04719e-06	659.45	-0.406367	0.125928	-3.22696	0.00125112	0.0236111
ENSDARG00000043483	15	47903864	47909281	otx5	orthodenticle homolog 5	circadian regulation of gene expression occurs_in pineal complex process quality;epiphysis decreased size;circadian regulation of gene expression process quality	A membrane-bounded organelle of eukaryotic cells in which chromosomes are housed and replicated. In most cells, the nucleus contains all of the cell's chromosomes except the organellar chromosomes, and is the site of RNA synthesis and processing. In some species, or in specialized cell types, RNA metabolism or DNA replication may be absent. [GOC:go_curators];"The biological process whose specific…	1	126	196	282	331	107	148	181	175	203	155	-6.97728	195.834	-0.698413	0.150996	-4.62539	3.73899e-06	0.000144039	203.15	-0.708718	0.181448	-3.9059	9.38743e-05	0.00153623	225.089	-0.671799	0.15106	-4.44722	8.69876e-06	0.000404086
ENSDARG00000045574	4	17252596	17278928	lrmp	lymphoid-restricted membrane protein	centrosome part_of blastomere detached from GO:0001940;pronuclear fusion disrupted;female pronucleus part_of blastomere misaligned with GO:0005818;embryonic cleavage disrupted;chordate embryonic development arrested;female pronucleus part_of blastomere movement quality;pronuclear migration disrupted	An intracellular structure that can catalyze gamma-tubulin-dependent microtubule nucleation and that can anchor microtubules by interacting with their minus ends, plus ends or sides. [GOC:vw, http://en.wikipedia.org/wiki/Microtubule_organizing_center, ISBN:0815316194, PMID:17072892, PMID:17245416];"Either of the lipid bilayers that surround the nucleus and form the nuclear envelope; excludes the …	4	23	368	616	502	251	295	263	402	519	330	-2.52356	389.189	-0.514069	0.162493	-3.16363	0.00155815	0.0185248	376.956	-0.711261	0.161113	-4.41466	1.01169e-05	0.000225764	456.914	-0.375282	0.151598	-2.47551	0.0133047	0.135294
ENSDARG00000043848	10	25694395	25699454	sod1	superoxide dismutase 1, soluble	sensory perception of touch disrupted;neuromuscular junction part_of trunk morphology	Catalysis of an oxidation-reduction (redox) reaction, a reversible chemical reaction in which the oxidation state of an atom or atoms within a molecule is altered. One substrate acts as a hydrogen or electron donor and becomes oxidized, while the other acts as hydrogen or electron acceptor and becomes reduced. [GOC:go_curators];"The cellular homeostatic process that preserves a neuron in a stable…	1	13	581	531	593	342	299	311	468	482	441	-3.70044	445.92	-0.580104	0.107384	-5.40216	6.58447e-08	4.90911e-06	437.629	-0.713566	0.127199	-5.60986	2.02495e-08	8.0983e-07	519.399	-0.455767	0.111669	-4.08142	4.47615e-05	0.00155758
ENSDARG00000077330	7	61843532	61901695	SH3TC1	SH3 domain and tetratricopeptide repeats 1	.	.	1	11	201	235	237	102	120	144	165	230	157	-3.45943	174.713	-0.55347	0.14858	-3.72506	0.000195273	0.00362385	170.469	-0.723459	0.162274	-4.45827	8.26252e-06	0.000188318	205.092	-0.411092	0.149892	-2.74259	0.00609568	0.0788393
ENSDARG00000033160	3	23488652	23496223	nr1d1	nuclear receptor subfamily 1, group d, member 1	glycogen granule part_of liver increased amount;smooth muscle cell part_of intestine decreased amount;mitochondrial chromosome part_of anatomical structure decreased amount;autolysosome part_of hindbrain increased amount;locomotion involved in locomotory behavior increased process quality;locomotor rhythm delayed;eye increased amount;locomotion involved in locomotory behavior increased occurrence…	A series of molecular signals mediated by a steroid hormone binding to a receptor. [PMID:12606724];"Any process that modulates the frequency, rate or extent of gene expression such that an expression pattern recurs with a regularity of approximately 24 hours." [GOC:mah];"Any process that stops, prevents, or reduces the frequency, rate or extent of transcription from an RNA polymerase II promoter.…	1	90	1648	2131	1356	1077	962	706	1901	1485	1194	-6.49185	1370.27	-0.475277	0.17903	-2.65473	0.00793729	0.0615667	1304.24	-0.732953	0.171806	-4.26618	1.98852e-05	0.000405027	1626.37	-0.323539	0.146783	-2.20419	0.0275109	0.219124
ENSDARG00000040255	17	6016243	6076266	ephx2	epoxide hydrolase 2, cytoplasmic	caudal vein plexus morphology;parachordal vessel agenesis;eye decreased size;parachordal vessel disorganized	Catalysis of a biochemical reaction at physiological temperatures. In biologically catalyzed reactions, the reactants are known as substrates, and the catalysts are naturally occurring macromolecular substances known as enzymes. Enzymes possess specific binding sites for substrates, and are usually composed wholly or largely of protein, but RNA that has catalytic activity (ribozyme) is often also…	6	46	848	943	957	455	509	548	892	900	937	-2.9386	763.411	-0.40765	0.148331	-2.74824	0.00599163	0.0496732	700.246	-0.740012	0.112854	-6.55728	5.47985e-11	3.5463e-09	911.914	-0.193359	0.0974805	-1.98357	0.0473042	0.304339
ENSDARG00000039516	2	1486822	1499584	c8a	complement component 8, alpha polypeptide	.	Any immune system process that functions in the calibrated response of an organism to a potential internal or invasive threat. [GO_REF:0000022, GOC:add, GOC:mtg_15nov05];"A protein complex produced by sequentially activated components of the complement cascade inserted into a target cell membrane and forming a pore leading to cell lysis via ion and water flow." [GOC:add, ISBN:0198547684, ISBN:068…	1	11	368	329	371	137	206	230	281	388	282	-3.45943	284.348	-0.483937	0.168608	-2.8702	0.00410218	0.0380132	270.009	-0.740284	0.166134	-4.45595	8.35218e-06	0.00019011	337.85	-0.321951	0.138424	-2.32583	0.0200276	0.179366
ENSDARG00000036041	7	38750871	38760158	f2	coagulation factor II (thrombin)	.	The space external to the outermost structure of a cell. For cells without external protective or external encapsulating structures this refers to space outside of the plasma membrane. This term covers the host cell environment outside an intracellular parasite. [GOC:go_curators];"Catalysis of the hydrolysis of various bonds, e.g. C-O, C-N, C-C, phosphoric anhydride bonds, etc. Hydrolase is the s…	22	46	1805	1790	1786	810	1071	1049	1357	1565	1431	-1.06413	1396.12	-0.590667	0.123763	-4.77257	1.81889e-06	7.80405e-05	1369.88	-0.747105	0.126438	-5.90888	3.44436e-09	1.63462e-07	1634.78	-0.474826	0.100461	-4.72647	2.28457e-06	0.000128995
ENSDARG00000069607	4	4782721	4795205	zgc:162331	zgc:162331	.	Any process specifically pertinent to the functioning of integrated living units: cells, tissues, organs, and organisms. A process is a collection of molecular events with a defined beginning and end. [GOC:go_curators, GOC:isa_complete];"A lipid bilayer along with all the proteins and protein complexes embedded in it an attached to it." [GOC:dos, GOC:mah, ISBN:0815316194];"The component of a memb…	2	16	62	68	69	28	32	38	60	39	50	-3	49.0337	-0.628733	0.177166	-3.54884	0.000386938	0.00624579	48.7072	-0.753413	0.232707	-3.2376	0.00120539	0.0128198	58.4497	-0.443007	0.191374	-2.31487	0.0206199	0.182376
ENSDARG00000025891	9	34641237	34647695	shox	short stature homeobox	developmental growth decreased process quality;bone mineralization decreased process quality;bone mineralization occurs_in branchiostegal ray decreased process quality;bone mineralization occurs_in opercle decreased process quality;bone mineralization occurs_in hyomandibula decreased process quality;bone mineralization occurs_in quadrate decreased process quality;bone mineralization occurs_in ver…	Any process that modulates the frequency, rate or extent of cellular DNA-templated transcription. [GOC:go_curators, GOC:txnOH];"The formation of bone or of a bony substance, or the conversion of fibrous tissue or of cartilage into bone or a bony substance." [GOC:mtg_mpo, PMID:17572649];"Interacting selectively and non-covalently with DNA of a specific nucleotide composition, e.g. GC-rich DNA bind…	1	42	357	399	427	206	201	232	332	379	313	-5.39232	311.905	-0.537332	0.126461	-4.24899	2.14741e-05	0.000602489	298.959	-0.755393	0.130443	-5.79099	6.99736e-09	3.11324e-07	368.739	-0.367411	0.120162	-3.05763	0.00223092	0.036539
ENSDARG00000053480	7	30371893	30390376	aqp9b	.	.	The component of a membrane consisting of the gene products and protein complexes having at least some part of their peptide sequence embedded in the hydrophobic region of the membrane. [GOC:dos, GOC:go_curators];"Enables the transfer of glycerol from one side of a membrane to the other. Glycerol is 1,2,3-propanetriol, a sweet, hygroscopic, viscous liquid, widely distributed in nature as a consti…	3	16	1415	1280	1552	705	631	972	1558	1249	1323	-2.41504	1164.72	-0.430078	0.156685	-2.74485	0.00605384	0.0500781	1074.12	-0.761871	0.125279	-6.08139	1.19146e-09	6.08727e-08	1395	-0.222695	0.105235	-2.11616	0.0343308	0.252907
ENSDARG00000019179	13	29462249	29467558	lrit1a	leucine-rich repeat, immunoglobulin-like and transmembrane domains 1a	.	A lipid bilayer along with all the proteins and protein complexes embedded in it an attached to it. [GOC:dos, GOC:mah, ISBN:0815316194];"The component of a membrane consisting of the gene products and protein complexes having at least some part of their peptide sequence embedded in the hydrophobic region of the membrane." [GOC:dos, GOC:go_curators];"Any process specifically pertinent to the funct…	1	13	407	353	403	201	198	224	372	311	298	-3.70044	303.962	-0.565192	0.129644	-4.35958	1.30315e-05	0.000400389	293.916	-0.765361	0.138893	-5.51045	3.5792e-08	1.36252e-06	359.217	-0.402715	0.126913	-3.17315	0.00150794	0.0270912
ENSDARG00000010423	7	38653481	38659477	npsn	nephrosin	.	The hydrolysis of proteins into smaller polypeptides and/or amino acids by cleavage of their peptide bonds. [GOC:bf, GOC:mah];"Interacting selectively and non-covalently with any metal ion." [GOC:ai];"Catalysis of the hydrolysis of various bonds, e.g. C-O, C-N, C-C, phosphoric anhydride bonds, etc. Hydrolase is the systematic name for any enzyme of EC class 3." [ISBN:0198506732];"Catalysis of the…	1	23	148	173	178	79	88	92	136	157	120	-4.52356	128.478	-0.573987	0.144346	-3.97647	6.99449e-05	0.00160413	124.407	-0.769771	0.174269	-4.41715	1.00009e-05	0.00022341	152.561	-0.398578	0.151308	-2.63422	0.00843303	0.09869
ENSDARG00000010096	11	6152643	6175057	slc1a6	solute carrier family 1 (high affinity aspartate/glutamate transporter), member 6	.	The process in which a solute is transported across a lipid bilayer, from one side of a membrane to the other. [GOC:dph, GOC:jid];"Enables the active transport of a solute across a membrane by a mechanism whereby two or more species are transported together in the same direction in a tightly coupled process not directly linked to a form of energy other than chemiosmotic energy." [GOC:mtg_transpor…	5	26	308	349	397	149	198	204	272	279	289	-2.37851	268.598	-0.610921	0.130495	-4.68158	2.84675e-06	0.000114315	263.208	-0.779408	0.150994	-5.16185	2.44521e-07	7.86443e-06	317.102	-0.471314	0.122807	-3.83784	0.00012412	0.00367242
ENSDARG00000086740	4	7827261	7836413	phyh	.	.	A metabolic pathway by which 3-methyl branched fatty acids are degraded. These compounds are not degraded by the normal peroxisomal beta-oxidation pathway, because the 3-methyl blocks the dehydrogenation of the hydroxyl group by hydroxyacyl-CoA dehydrogenase. The 3-methyl branched fatty acid is converted in several steps to pristenic acid, which can then feed into the beta-oxidative pathway. [htt…	13	35	1611	1454	1621	850	779	893	1354	1196	1106	-1.42884	1196.67	-0.645155	0.100517	-6.41838	1.3773e-10	2.42712e-08	1185.83	-0.779939	0.105379	-7.40126	1.34903e-13	1.28616e-11	1401.19	-0.524465	0.102868	-5.09841	3.42516e-07	2.55339e-05
ENSDARG00000023820	21	45839917	45852112	faxdc2	fatty acid hydroxylase domain containing 2	.	Catalysis of an oxidation-reduction (redox) reaction, a reversible chemical reaction in which the oxidation state of an atom or atoms within a molecule is altered. One substrate acts as a hydrogen or electron donor and becomes oxidized, while the other acts as hydrogen or electron acceptor and becomes reduced. [GOC:go_curators];"The lipid bilayer surrounding the endoplasmic reticulum." [GOC:mah];…	4	22	1918	1597	1700	909	901	979	1737	1305	1365	-2.45943	1365.08	-0.567311	0.1339	-4.23681	2.26713e-05	0.00063358	1319.92	-0.783638	0.118963	-6.58725	4.48055e-11	2.96244e-09	1614.34	-0.410066	0.12	-3.41722	0.000632642	0.013711
ENSDARG00000045592	25	31222069	31236549	tnni2a.1	troponin I type 2a (skeletal, fast), tandem duplicate 1	.	A complex of accessory proteins (typically troponin T, troponin I and troponin C) found associated with actin in muscle thin filaments; involved in calcium regulation of muscle contraction. [ISBN:0815316194];"Muscle contraction of cardiac muscle tissue." [GOC:dph];"A process in which force is generated within skeletal muscle tissue, resulting in a change in muscle geometry. Force generation invol…	1	38	797	674	739	444	313	409	732	602	618	-5.24793	584.147	-0.528782	0.146967	-3.59798	0.000320702	0.00541864	555.386	-0.793687	0.136582	-5.81108	6.20722e-09	2.79077e-07	696.966	-0.350386	0.117745	-2.97581	0.00292214	0.0450427
ENSDARG00000007715	11	11263451	11266882	lgsn	lengsin, lens protein with glutamine synthetase domain	cell part_of lens vacuolated;lens fiber cell differentiation disrupted;eye decreased size;lens morphogenesis in camera-type eye disrupted;cell part_of lens decreased length;cell part_of lens morphology;presumptive neural retina decreased size;lens decreased size	The chemical reactions and pathways involving organic or inorganic compounds that contain nitrogen. [CHEBI:51143, GOC:go_curators, GOC:jl, ISBN:0198506732];"The chemical reactions and pathways resulting in the formation of glutamine, 2-amino-4-carbamoylbutanoic acid." [GOC:ai];"Catalysis of a biochemical reaction at physiological temperatures. In biologically catalyzed reactions, the reactants ar…	1	52	757	678	775	336	366	464	751	748	659	-5.70044	603.975	-0.438188	0.159022	-2.75552	0.00585981	0.0489611	554.559	-0.796099	0.128561	-6.19236	5.92688e-10	3.22894e-08	728.082	-0.217681	0.10759	-2.02324	0.0430481	0.28866
ENSDARG00000033285	13	25396896	25402772	gsto2	glutathione S-transferase omega 2	.	All of the contents of a cell excluding the plasma membrane and nucleus, but including other subcellular structures. [ISBN:0198547684];"The chemical reactions and pathways resulting in the breakdown of toxin, a poisonous compound (typically a protein) that is produced by cells or organisms and that can cause disease when introduced into the body or tissues of an organism." [GOC:go_curators];"Cata…	1	30	904	731	542	435	289	388	682	467	610	-4.90689	557.304	-0.586087	0.175035	-3.34839	0.000812816	0.0111804	544.192	-0.812834	0.177165	-4.58801	4.47494e-06	0.000107746	665.056	-0.437876	0.158065	-2.77023	0.00560171	0.0741749
ENSDARG00000097008	6	41181869	41183823	opn1mw1	opsin 1 (cone pigments), medium-wave-sensitive, 1	.	A series of molecular signals that proceeds with an activated receptor promoting the exchange of GDP for GTP on the alpha-subunit of an associated heterotrimeric G-protein complex. The GTP-bound activated alpha-G-protein then dissociates from the beta- and gamma-subunits to further transmit the signal within the cell. The pathway begins with receptor-ligand interaction, or for basal GPCR signalin…	1	297	12113	12353	14357	6423	6300	7606	11443	10802	12491	-8.21432	10271.8	-0.525823	0.134978	-3.89563	9.79443e-05	0.00211597	9698.31	-0.823776	0.087151	-9.45229	3.3151e-21	6.55531e-19	12283.8	-0.336068	0.0908192	-3.70041	0.00021525	0.0057149
ENSDARG00000024160	17	4030493	4063581	hao1	hydroxyacid oxidase (glycolate oxidase) 1	.	Catalysis of an oxidation-reduction (redox) reaction, a reversible chemical reaction in which the oxidation state of an atom or atoms within a molecule is altered. One substrate acts as a hydrogen or electron donor and becomes oxidized, while the other acts as hydrogen or electron acceptor and becomes reduced. [GOC:go_curators];"A metabolic process that results in the removal or addition of one o…	5	16	349	418	393	183	227	170	303	399	277	-1.67807	298.695	-0.557482	0.163904	-3.40128	0.000670709	0.00966973	286.54	-0.828641	0.157198	-5.27132	1.35446e-07	4.58412e-06	357.95	-0.390581	0.135557	-2.8813	0.00396038	0.0571364
ENSDARG00000043394	20	19276932	19366022	si:dkey-71h2.2	si:dkey-71h2.2	.	.	5	16	329	370	434	206	139	227	328	313	336	-1.67807	292.732	-0.554365	0.151995	-3.64725	0.000265063	0.00463653	278.275	-0.836422	0.150895	-5.54308	2.97197e-08	1.1582e-06	352.204	-0.36928	0.120329	-3.06892	0.00214831	0.0354352
ENSDARG00000070584	20	43925266	43968859	clic5b	chloride intracellular channel 5b	.	Enables the facilitated diffusion of a chloride (by an energy-independent process) involving passage through a transmembrane aqueous pore or channel without evidence for a carrier-mediated mechanism. [GOC:mtg_transport, GOC:pr, ISBN:0815340729];"The directed movement of charged atoms or small charged molecules into, out of or within a cell, or between cells, by means of some agent such as a trans…	5	19	1352	1205	1284	684	559	739	1326	1145	1080	-1.926	1025.04	-0.502569	0.151046	-3.32726	0.000877041	0.0118662	957.114	-0.838121	0.116306	-7.20615	5.75572e-13	4.95641e-11	1235.31	-0.294617	0.107444	-2.74204	0.00610592	0.0788575
ENSDARG00000040123	16	43818896	44127387	zfpm2a	zinc finger protein, FOG family member 2a	.	Interacting selectively and non-covalently with any protein or protein complex (a complex of two or more proteins that may include other nonprotein molecules). [GOC:go_curators];"Interacting selectively and non-covalently with an RNA polymerase II transcription factor, any protein required to initiate or regulate transcription by RNA polymerase II." [GOC:txnOH];"A membrane-bounded organelle of eu…	3	41	406	527	509	208	241	278	360	493	354	-3.77259	369.756	-0.574375	0.153354	-3.74542	0.000180089	0.00341034	355.312	-0.842493	0.138533	-6.08153	1.1904e-09	6.08727e-08	442.915	-0.399381	0.133876	-2.98322	0.00285235	0.0442272
ENSDARG00000099200	19	42547699	42551338	zgc:123103	zgc:123103;zgc:158580	.	The component of a membrane consisting of the gene products and protein complexes having at least some part of their peptide sequence embedded in the hydrophobic region of the membrane. [GOC:dos, GOC:go_curators];"A lipid bilayer along with all the proteins and protein complexes embedded in it an attached to it." [GOC:dos, GOC:mah, ISBN:0815316194];"The hydrolysis of proteins into smaller polypep…	10	31	4311	4756	4414	1567	2643	1782	3298	4306	2908	-1.63227	3300.29	-0.653105	0.178193	-3.66516	0.000247183	0.00437764	3209.01	-0.843441	0.239295	-3.52469	0.000423985	0.00548765	4030.39	-0.510926	0.119083	-4.29051	1.78264e-05	0.000722435
ENSDARG00000075292	3	40056485	40136743	myo15aa	.	.	Interacting selectively and non-covalently with microtubules, filaments composed of tubulin monomers. [GOC:krc];"Interacting selectively and non-covalently with ATP, adenosine 5'-triphosphate, a universally important coenzyme and enzyme regulator." [ISBN:0198506732];"Interacting selectively and non-covalently with monomeric or multimeric forms of actin, including actin filaments." [GOC:clt];"Cata…	6	22	419	514	456	233	209	258	346	384	342	-1.87447	347.538	-0.673676	0.119312	-5.64633	1.63908e-08	1.56727e-06	342.719	-0.852687	0.132773	-6.42213	1.34379e-10	8.24652e-09	413.342	-0.520261	0.120497	-4.31763	1.57711e-05	0.000661966
ENSDARG00000009040	3	18023975	18030938	si:ch73-141c7.1	.	.	.	4	21	1211	1049	959	547	478	605	1089	887	931	-2.39232	850.376	-0.527513	0.157419	-3.35101	0.000805177	0.0111053	799.312	-0.856333	0.13361	-6.40922	1.46265e-10	8.89926e-09	1027.17	-0.322121	0.124053	-2.59664	0.00941405	0.107177
ENSDARG00000033227	14	36885524	36887063	lect2l	leukocyte cell-derived chemotaxin 2 like	determination of left/right symmetry disrupted;cilium part_of pronephric duct decreased length;ventricular system hydrocephalic;otolith morphology;anterior-posterior axis part_of whole organism curved	The assembly of a cilium, a specialized eukaryotic organelle that consists of a filiform extrusion of the cell surface. Each cilium is bounded by an extrusion of the cytoplasmic membrane, and contains a regular longitudinal array of microtubules, anchored basally in a centriole. [GOC:BHF, GOC:cilia, GOC:dph, GOC:kmv, GOC:pr, GOC:vw, ISBN:0198506732, PMID:13978319, PMID:27350441, Reactome:R-HSA-56…	6	13	154	140	136	61	75	69	80	118	68	-1.11548	100.087	-0.803062	0.164758	-4.87418	1.09259e-06	5.07416e-05	104.707	-0.860791	0.192716	-4.46663	7.94605e-06	0.000182133	118.074	-0.702225	0.175443	-4.00258	6.26556e-05	0.0020349
ENSDARG00000025847	11	24187610	24191928	sox12	SRY (sex determining region Y)-box 12	.	A membrane-bounded organelle of eukaryotic cells in which chromosomes are housed and replicated. In most cells, the nucleus contains all of the cell's chromosomes except the organellar chromosomes, and is the site of RNA synthesis and processing. In some species, or in specialized cell types, RNA metabolism or DNA replication may be absent. [GOC:go_curators];"Any molecular function by which a gen…	1	11	611	567	737	295	323	337	426	473	338	-3.45943	453.865	-0.815259	0.110867	-7.35349	1.93101e-13	7.91826e-11	470.679	-0.86347	0.127713	-6.76104	1.37008e-11	9.8186e-10	531.273	-0.746094	0.125842	-5.9288	3.05148e-09	3.73815e-07
ENSDARG00000097804	15	39957809	39963009	lypc	ly6 domain containing, pigment cell	.	Any biological process in an organism that recurs with a regularity of approximately 24 hours. [GOC:bf, GOC:go_curators];"A lipid bilayer along with all the proteins and protein complexes embedded in it an attached to it." [GOC:dos, GOC:mah, ISBN:0815316194];"The component of a membrane consisting of the gene products and protein complexes having at least some part of their peptide sequence embed…	1	12	156	110	127	45	79	55	100	123	99	-3.58496	98.5559	-0.573217	0.19578	-2.92786	0.00341308	0.0331407	94.6549	-0.863567	0.221712	-3.895	9.81999e-05	0.00159844	120.356	-0.392893	0.170846	-2.29969	0.0214657	0.186892
ENSDARG00000011671	21	20356458	20376607	pde6b	phosphodiesterase 6B, cGMP-specific, rod, beta	.	Catalysis of the hydrolysis of various bonds, e.g. C-O, C-N, C-C, phosphoric anhydride bonds, etc. Hydrolase is the systematic name for any enzyme of EC class 3. [ISBN:0198506732];"Interacting selectively and non-covalently with any metal ion." [GOC:ai];"Catalysis of the reaction: nucleoside 3',5'-cyclic phosphate + H2O = nucleoside 5'-phosphate." [EC:3.1.4.17];"Catalysis of the hydrolysis of a p…	3	12	742	709	828	414	312	421	611	512	511	-2	557.029	-0.744086	0.105109	-7.07916	1.45033e-12	5.24161e-10	561.44	-0.864253	0.121433	-7.11713	1.10197e-12	8.91429e-11	658.167	-0.630101	0.108609	-5.80157	6.5698e-09	7.20545e-07
ENSDARG00000102888	9	56422311	56426047	gpr39	.	.	Combining with an extracellular signal and transmitting the signal across the membrane by activating an associated G-protein; promotes the exchange of GDP for GTP on the alpha subunit of a heterotrimeric G-protein complex. [GOC:bf, http://www.iuphar-db.org, Wikipedia:GPCR];"Conveys a signal across a cell to trigger a change in cell function or state. A signal is a physical entity or change in sta…	2	19	708	911	857	341	414	471	759	762	620	-3.24793	638.899	-0.564251	0.15173	-3.71877	0.000200192	0.00369264	606.667	-0.87352	0.130868	-6.67483	2.47511e-11	1.72177e-09	770.972	-0.374954	0.11193	-3.3499	0.000808408	0.0165538
ENSDARG00000068883	15	34592215	34599768	tspan13a	tetraspanin 13a	.	The component of a membrane consisting of the gene products and protein complexes having at least some part of their peptide sequence embedded in the hydrophobic region of the membrane. [GOC:dos, GOC:go_curators];"The component of the plasma membrane consisting of the gene products and protein complexes having at least some part of their peptide sequence embedded in the hydrophobic region of the …	3	12	424	353	462	197	198	213	288	338	323	-2	307.664	-0.680446	0.131943	-5.15712	2.50782e-07	1.50632e-05	303.252	-0.877887	0.142039	-6.18059	6.38638e-10	3.46162e-08	367.707	-0.520065	0.129582	-4.0134	5.98492e-05	0.00196817
ENSDARG00000038865	7	61764040	61806065	acox3	.	.	Interacting selectively and non-covalently with FAD, flavin-adenine dinucleotide, the coenzyme or the prosthetic group of various flavoprotein oxidoreductase enzymes, in either the oxidized form, FAD, or the reduced form, FADH2. [CHEBI:24040, GOC:ai, GOC:imk, ISBN:0198506732];"Catalysis of the reaction: acyl-CoA + O2 = trans-2,3-dehydroacyl-CoA + hydrogen peroxide." [EC:1.3.3.6];"A fatty acid oxi…	4	24	514	524	620	265	259	292	453	514	435	-2.58496	424.302	-0.595449	0.139368	-4.27249	1.93306e-05	0.000551051	405.399	-0.888059	0.121976	-7.28064	3.3225e-13	2.96884e-11	511.597	-0.402536	0.112856	-3.56683	0.000361332	0.00868025
ENSDARG00000030411	24	41305391	41312459	crygn2	crystallin, gamma N2	.	.	2	890	11078	9594	10660	4127	5516	5690	10549	9511	7972	-8.79766	8177.99	-0.539293	0.162476	-3.31922	0.000902683	0.0121208	7679.97	-0.894939	0.128433	-6.96814	3.21159e-12	2.49407e-10	9927.98	-0.340039	0.106645	-3.18851	0.00143009	0.0259148
ENSDARG00000052207	1	56274613	56320569	c3a.3	complement component c3a, duplicate 3	.	That part of a multicellular organism outside the cells proper, usually taken to be outside the plasma membranes, and occupied by fluid. [ISBN:0198547684];"Any process that decreases the frequency, rate or extent of endopeptidase activity, the endohydrolysis of peptide bonds within proteins." [GOC:dph, GOC:tb];"The space external to the outermost structure of a cell. For cells without external pr…	2	20	2086	2000	1928	680	1115	1089	1251	1748	1027	-3.32193	1430.68	-0.753451	0.162663	-4.63198	3.62184e-06	0.000140161	1465.62	-0.898588	0.154492	-5.81641	6.01235e-09	2.72611e-07	1697.42	-0.69076	0.137274	-5.03198	4.85446e-07	3.45889e-05
ENSDARG00000070029	9	12428226	12443726	ehhadh	enoyl-CoA, hydratase/3-hydroxyacyl CoA dehydrogenase	.	Catalysis of an oxidation-reduction (redox) reaction, a reversible chemical reaction in which the oxidation state of an atom or atoms within a molecule is altered. One substrate acts as a hydrogen or electron donor and becomes oxidized, while the other acts as hydrogen or electron acceptor and becomes reduced. [GOC:go_curators];"A metabolic process that results in the removal or addition of one o…	2	19	209	259	244	82	124	127	159	186	185	-3.24793	173.247	-0.695727	0.155372	-4.47782	7.54089e-06	0.00025645	171.366	-0.90347	0.175873	-5.13706	2.79077e-07	8.85583e-06	208.762	-0.541956	0.140885	-3.8468	0.00011967	0.003571
ENSDARG00000019260	9	48706038	48736388	dhrs9	.	intestine lacks all parts of type;pericardium edematous;pancreas molecular quality;pectoral fin development disrupted;intestine morphology;pectoral fin absent;heart contraction decreased rate;eye decreased size;heart looping disrupted;intestinal bulb hypoplastic;intestine molecular quality;exocrine pancreas development disrupted;trunk neural crest cell decreased amount;heart decreased functionali…	The process whose specific outcome is the progression of the exocrine pancreas over time, from its formation to the mature structure. The exocrine pancreas produces and store zymogens of digestive enzymes, such as chymotrypsinogen and trypsinogen in the acinar cells. [GOC:cvs];"The chemical reactions and pathways involving retinal, a compound that plays an important role in the visual process in …	3	11	475	404	400	230	175	206	420	312	374	-1.87447	328.603	-0.573391	0.166222	-3.44956	0.000561509	0.00844215	311.253	-0.91485	0.151343	-6.04489	1.49514e-09	7.53073e-08	400.267	-0.36721	0.135954	-2.70098	0.0069136	0.0858483
ENSDARG00000020602	2	16536453	16544343	grk7a	G protein-coupled receptor kinase 7a	cone photoresponse recovery decreased efficacy;cellular response to light stimulus disrupted	Catalysis of the reaction: ATP + rhodopsin = ADP + phosphorhodopsin. [EC:2.7.11.14, MetaCyc:RHODOPSIN-KINASE-RXN];"Catalysis of the transfer of a group, e.g. a methyl group, glycosyl group, acyl group, phosphorus-containing, or other groups, from one compound (generally regarded as the donor) to another compound (generally regarded as the acceptor). Transferase is the systematic name for any enzy…	1	89	3028	3265	2674	1516	1464	1341	2628	2549	1868	-6.47573	2238.89	-0.664031	0.146715	-4.52599	6.01141e-06	0.00021187	2190.85	-0.916745	0.126068	-7.27182	3.54677e-13	3.15603e-11	2692.29	-0.504259	0.122704	-4.10955	3.96428e-05	0.00140277
ENSDARG00000061383	15	26540981	26552652	serpinf2b	serpin peptidase inhibitor, clade F (alpha-2 antiplasmin, pigment epithelium derived factor), member 2b	.	Any process that decreases the frequency, rate or extent of endopeptidase activity, the endohydrolysis of peptide bonds within proteins. [GOC:dph, GOC:tb];"That part of a multicellular organism outside the cells proper, usually taken to be outside the plasma membranes, and occupied by fluid." [ISBN:0198547684];"Stops, prevents or reduces the activity of serine-type endopeptidases, enzymes that ca…	2	14	842	737	746	359	372	388	659	615	582	-2.80735	583.186	-0.663641	0.136817	-4.85056	1.23114e-06	5.58543e-05	567.323	-0.920123	0.129216	-7.12081	1.07292e-12	8.74549e-11	703.172	-0.487078	0.115019	-4.23476	2.288e-05	0.000883618
ENSDARG00000010312	22	38173960	38199988	cp	ceruloplasmin	otolith morphology;anterior-posterior axis part_of whole organism curved;determination of left/right symmetry disrupted;ventricular system hydrocephalic	Any process involved in the maintenance of an internal steady state of iron ions at the level of a cell. [GOC:ai, GOC:mah];"Interacting selectively and non-covalently with any metal ion." [GOC:ai];"Catalysis of the reaction: 4 Fe2+ + 4 H+ + O2 = 4 Fe3+ + 2 H2O." [EC:1.16.3.1];"All of the contents of a cell excluding the plasma membrane and nucleus, but including other subcellular structures." [IS…	6	82	2034	2562	2744	866	1267	1313	1866	2655	1939	-3.77259	1882.68	-0.540159	0.17636	-3.06282	0.0021926	0.0239635	1764.73	-0.93194	0.139644	-6.67369	2.49457e-11	1.72968e-09	2301.71	-0.339452	0.122568	-2.76949	0.00561434	0.0742951
ENSDARG00000001463	17	25414033	25425321	tdh2	L-threonine dehydrogenase 2	.	Catalysis of a biochemical reaction at physiological temperatures. In biologically catalyzed reactions, the reactants are known as substrates, and the catalysts are naturally occurring macromolecular substances known as enzymes. Enzymes possess specific binding sites for substrates, and are usually composed wholly or largely of protein, but RNA that has catalytic activity (ribozyme) is often also…	2	55	530	603	622	246	262	328	480	534	408	-4.78136	439.39	-0.643374	0.144111	-4.46442	8.02867e-06	0.000268753	424.183	-0.933507	0.126235	-7.39498	1.41429e-13	1.33644e-11	531.932	-0.459136	0.115831	-3.96386	7.37482e-05	0.00235141
ENSDARG00000006220	9	9969987	10003782	ugt1ab	UDP glucuronosyltransferase 1 family, polypeptide A4;UDP glucuronosyltransferase 1 family, polypeptide A6;UDP glucuronosyltransferase 1 family a, b;UDP glucuronosyltransferase 1 family, polypeptide A2;UDP glucuronosyltransferase 1 family polypeptide a1	.	The component of a membrane consisting of the gene products and protein complexes having at least some part of their peptide sequence embedded in the hydrophobic region of the membrane. [GOC:dos, GOC:go_curators];"Catalysis of the transfer of a hexosyl group from one compound (donor) to another (acceptor)." [GOC:jl];"The modification of a xenobiotic substance by the conjugation of glucuronic acid…	8	63	2052	2049	1858	851	1034	934	1318	1642	1236	-2.97728	1434.53	-0.769683	0.132106	-5.82627	5.66788e-09	6.26198e-07	1446.82	-0.939668	0.127461	-7.37219	1.67848e-13	1.56531e-11	1714.97	-0.650422	0.117335	-5.54327	2.96882e-08	2.93353e-06
ENSDARG00000043719	1	56036644	56080165	c3a.6	complement component c3a, duplicate 6	.	Any process involved in the activation of any of the steps of the complement cascade, which allows for the direct killing of microbes, the disposal of immune complexes, and the regulation of other immune processes; the initial steps of complement activation involve one of three pathways, the classical pathway, the alternative pathway, and the lectin pathway, all of which lead to the terminal comp…	3	11	946	1003	1008	374	518	495	862	1034	702	-1.87447	759.58	-0.555889	0.171242	-3.24622	0.00116948	0.0148256	713.802	-0.942805	0.134203	-7.02522	2.1373e-12	1.69681e-10	928.633	-0.352155	0.120129	-2.93147	0.00337367	0.0505519
ENSDARG00000074919	13	985442	992458	BFSP1	.	.	.	1	241	906	884	1100	297	476	549	805	861	716	-7.91289	721.045	-0.610898	0.172619	-3.53901	0.000401637	0.00641988	689.206	-0.953565	0.159681	-5.97169	2.34805e-09	1.14486e-07	881.827	-0.441772	0.105716	-4.17885	2.92987e-05	0.00108628
ENSDARG00000087013	24	32035759	32150276	cubn	cubilin (intrinsic factor-cobalamin receptor)	.	Interacting selectively and non-covalently with calcium ions (Ca2+). [GOC:ai]	4	52	1485	1272	1504	631	669	704	1061	1072	874	-3.70044	1022.48	-0.788364	0.116258	-6.78116	1.19215e-11	3.1383e-09	1029.45	-0.958352	0.115751	-8.27945	1.23743e-16	1.71601e-14	1224.91	-0.653418	0.109707	-5.956	2.58483e-09	3.25119e-07
ENSDARG00000032929	14	46313135	46321016	cryba1l1	.	.	The actions of a single gene product or complex at the molecular level consisting of a single biochemical activity or multiple causally linked biochemical activities. A given gene product may exhibit one or more molecular functions. [GOC:go_curators];"The part of a cell, extracellular environment or virus in which a gene product is located. A gene product may be located in one or more parts of a …	2	912	11183	9598	10574	4119	5187	5392	10311	9118	8103	-8.83289	8056.45	-0.574405	0.163009	-3.52377	0.000425459	0.00672502	7576.36	-0.959274	0.122863	-7.80764	5.82672e-15	6.40781e-13	9858.28	-0.366491	0.104622	-3.503	0.000460047	0.0105554
ENSDARG00000086658	9	22298246	22299412	crygm2d21	crystallin, gamma M2d21	.	.	0	110	1260	748	755	408	339	250	283	363	290	-2	531.803	-1.25952	0.189241	-6.65563	2.82084e-11	6.22222e-09	622.914	-0.961324	0.273079	-3.52031	0.000431043	0.00555879	643.915	-1.10444	0.206609	-5.34558	9.013e-08	7.76972e-06
ENSDARG00000078671	9	11532025	11534622	cdk5r2b	cyclin-dependent kinase 5, regulatory subunit 2b (p39)	.	A protein complex that activates cyclin-dependent kinase 5; composed of regulatory and catalytic subunits. [PMID:15689152];"Any process that increases the rate, frequency, or extent of protein serine/threonine kinase activity." [GOC:mah];"Binds to and increases the activity of cyclin-dependent protein kinase 5." [GOC:mah]	2	18	717	621	624	316	284	315	694	484	528	-3.16993	502.056	-0.580145	0.167199	-3.46979	0.000520869	0.00796735	473.62	-0.961885	0.133408	-7.21008	5.59206e-13	4.83498e-11	614.823	-0.364254	0.132126	-2.75687	0.00583578	0.0763096
ENSDARG00000053831	21	39067512	39081107	vtnb	vitronectin b	.	Combining with any modified low-density lipoprotein (LDL) or other polyanionic ligand and delivering the ligand into the cell via endocytosis. Ligands include acetylated and oxidized LDL, Gram-positive and Gram-negative bacteria, apoptotic cells, amyloid-beta fibrils, and advanced glycation end products (AGEs). [GOC:bf, PMID:11790542, PMID:12379907, PMID:12621157, PMID:20981357];"An endocytosis p…	2	25	621	533	649	242	287	305	498	533	452	-3.64386	451.67	-0.636991	0.153611	-4.14679	3.37164e-05	0.000873555	432.95	-0.964296	0.136039	-7.08836	1.35708e-12	1.08546e-10	550.876	-0.441152	0.116548	-3.78515	0.000153613	0.00436029
ENSDARG00000091792	17	7763630	7783588	akap12a	A kinase (PRKA) anchor protein 12a	.	Interacting selectively and non-covalently with any subunit of protein kinase A. [GOC:ai];"Any process that increases the rate, frequency, or extent of protein kinase A signaling. PKA signaling is the series of reactions, mediated by the intracellular serine/threonine kinase protein kinase A, which occurs as a result of a single trigger reaction or compound." [GOC:BHF, GOC:dph, GOC:tb];"Any proce…	4	61	1475	1344	1421	492	750	686	1114	1310	853	-3.93074	1038.92	-0.675112	0.166452	-4.0559	4.99417e-05	0.00121426	1015.15	-0.974591	0.146677	-6.64447	3.04309e-11	2.08295e-09	1263.68	-0.519322	0.125828	-4.12725	3.67134e-05	0.00132599
ENSDARG00000014727	6	23122789	23138502	acox1	acyl-CoA oxidase 1, palmitoyl	.	Catalysis of the reaction: acyl-CoA + O2 = trans-2,3-dehydroacyl-CoA + hydrogen peroxide. [EC:1.3.3.6];"A fatty acid oxidation process that results in the complete oxidation of a long-chain fatty acid. Fatty acid beta-oxidation begins with the addition of coenzyme A to a fatty acid, and occurs by successive cycles of reactions during each of which the fatty acid is shortened by a two-carbon fragm…	6	25	1248	1053	1084	566	467	529	866	711	849	-2.05889	813.707	-0.775919	0.13167	-5.89292	3.79429e-09	4.53464e-07	814.197	-0.981921	0.128064	-7.6674	1.75519e-14	1.80211e-12	981.567	-0.625008	0.120099	-5.20409	1.94945e-07	1.58899e-05
ENSDARG00000015866	16	23978978	23980354	apoa2	apolipoprotein A-II	convergent extension involved in gastrulation disrupted;mitotic nuclear division disrupted;anterior-posterior axis part_of whole organism deformed;nucleus part_of YSL irregular spatial pattern;nucleus part_of YSL undivided;nucleus part_of YSL aggregated;anterior-posterior axis part_of whole organism increased length;chromosome part_of YSL fused with GO:0005694;nucleus part_of YSL dense;nucleus pa…	The division of a cell nucleus into two nuclei, with DNA and other nuclear contents distributed between the daughter nuclei. [GOC:mah];"The process whose specific outcome is the progression of the embryo over time, from zygote formation through a stage including a notochord and neural tube until birth or egg hatching." [GOC:mtg_sensu];"The expansion of one cell sheet over other cells involved in …	129	568	24330	23792	25508	9547	12870	11108	17472	20960	17231	-2.13852	17922.3	-0.718219	0.145073	-4.95074	7.39312e-07	3.65762e-05	17619.8	-0.987459	0.124926	-7.90436	2.69307e-15	3.04302e-13	21741.5	-0.568836	0.0964335	-5.89874	3.66284e-09	4.35961e-07
ENSDARG00000003113	23	25946448	25976656	ada	adenosine deaminase	.	Catalysis of the reaction: adenosine + H2O = inosine + NH3. [EC:3.5.4.4];"The chemical reactions and pathways resulting in the formation of purine ribonucleoside monophosphate, a compound consisting of a purine base linked to a ribose sugar esterified with phosphate on the sugar." [GOC:go_curators, ISBN:0198506732];"Catalysis of the removal of an amino group from a substrate, producing ammonia (N…	1	48	5100	3847	4331	2187	1661	2230	4160	3196	3630	-5.58496	3328.13	-0.637027	0.162643	-3.91672	8.97607e-05	0.00197316	3182.75	-0.997256	0.130932	-7.61658	2.60491e-14	2.61732e-12	4078.23	-0.436445	0.12274	-3.55584	0.000376773	0.00897911
ENSDARG00000103226	2	28648888	28682476	dhcr7	7-dehydrocholesterol reductase	.	The component of a membrane consisting of the gene products and protein complexes having at least some part of their peptide sequence embedded in the hydrophobic region of the membrane. [GOC:dos, GOC:go_curators];"A lipid bilayer along with all the proteins and protein complexes embedded in it an attached to it." [GOC:dos, GOC:mah, ISBN:0815316194];"A metabolic process that results in the removal…	9	23	737	592	664	258	308	331	459	468	364	-1.35364	462.561	-0.865805	0.129478	-6.68688	2.27974e-11	5.40122e-09	475.446	-1.00009	0.142611	-7.01268	2.33787e-12	1.84917e-10	556	-0.747456	0.128213	-5.82981	5.5489e-09	6.24938e-07
ENSDARG00000006811	12	15197857	15205087	sult1st6	sulfotransferase family 1, cytosolic sulfotransferase 6	.	The part of a cell, extracellular environment or virus in which a gene product is located. A gene product may be located in one or more parts of a cell and its location may be as specific as a particular macromolecular complex, that is, a stable, persistent association of macromolecules that function together. [GOC:go_curators, NIF_Subcellular:sao-1337158144];"Catalysis of the transfer of a group…	0	11	348	259	320	156	115	131	260	194	159	-2	214.291	-0.825616	0.159997	-5.16018	2.46708e-07	1.50407e-05	218.378	-1.02124	0.167961	-6.08025	1.19997e-09	6.11613e-08	260.26	-0.676617	0.155327	-4.35607	1.3242e-05	0.000569432
ENSDARG00000061375	13	25725547	25750910	sgpl1	sphingosine-1-phosphate lyase 1	Meckel's cartilage mislocalised ventrally;pharyngeal arch 3-7 skeleton quality;ventral mandibular arch increased length;mouth quality	Catalysis of the nonhydrolytic addition or removal of a carboxyl group to or from a compound. [http://www.mercksource.com/];"The chemical reactions and pathways involving carboxylic acids, any organic acid containing one or more carboxyl (COOH) groups or anions (COO-)." [ISBN:0198506732];"Interacting selectively and non-covalently with pyridoxal 5' phosphate, 3-hydroxy-5-(hydroxymethyl)-2-methyl4…	23	57	3501	2651	2381	1443	1016	1324	3270	1816	2304	-1.30933	2160.37	-0.506705	0.216586	-2.33951	0.0193089	0.11575	2032	-1.02303	0.154099	-6.63878	3.16282e-11	2.15112e-09	2677.3	-0.267437	0.20611	-1.29755	0.194444	0.626358
ENSDARG00000069737	1	36436936	36440301	pou4f2	POU class 4 homeobox 2	.	A membrane-bounded organelle of eukaryotic cells in which chromosomes are housed and replicated. In most cells, the nucleus contains all of the cell's chromosomes except the organellar chromosomes, and is the site of RNA synthesis and processing. In some species, or in specialized cell types, RNA metabolism or DNA replication may be absent. [GOC:go_curators];"Interacting selectively and non-coval…	1	42	363	454	490	136	199	229	312	381	278	-5.39232	311.202	-0.720495	0.167217	-4.30874	1.64185e-05	0.000480236	305.44	-1.02653	0.161216	-6.36743	1.92223e-10	1.15312e-08	381.835	-0.555236	0.130481	-4.25531	2.08762e-05	0.000822021
ENSDARG00000030758	15	2884711	2903475	guca1c	guanylate cyclase activator 1C	.	Binds to and increases the activity of guanylate cyclase in response to a change in calcium ion concentration. [GOC:mah];"Any process that activates or increases the frequency, rate or extent of guanylate cyclase activity." [GOC:mah];"Interacting selectively and non-covalently with calcium ions (Ca2+)." [GOC:ai];"Binds to and increases the activity of guanylate cyclase." [GOC:mah]	1	15	693	483	441	263	133	171	751	382	317	-3.90689	396.037	-0.412692	0.234675	-1.75857	0.0786504	0.29309	360.038	-1.02877	0.267659	-3.84359	0.000121246	0.00191686	514.569	-0.187197	0.213401	-0.877209	0.380373	0.805261
ENSDARG00000044632	21	22237964	22309466	myo7ab	.	.	Interacting selectively and non-covalently with monomeric or multimeric forms of actin, including actin filaments. [GOC:clt];"Interacting selectively and non-covalently with a nucleotide, any compound consisting of a nucleoside that is esterified with (ortho)phosphate or an oligophosphate at any hydroxyl group on the ribose or deoxyribose." [GOC:mah, ISBN:0198547684];"Catalysis of movement along …	5	19	29	33	35	13	9	7	25	56	27	-1.926	25.169	-0.299048	0.234481	-1.27536	0.20218	0.504752	20.5508	-1.03114	0.284796	-3.62063	0.000293889	0.00403471	33.9778	-0.0216116	0.21136	-0.10225	0.918558	0.986697
ENSDARG00000005713	16	54303491	54320489	ethe1	ethylmalonic encephalopathy 1	.	.	0	16	342	352	397	145	168	162	231	298	181	-2	250.994	-0.850931	0.144368	-5.89418	3.76545e-09	4.53464e-07	256.654	-1.03436	0.143447	-7.21079	5.56285e-13	4.82927e-11	303.693	-0.709254	0.143864	-4.93004	8.22127e-07	5.38185e-05
ENSDARG00000016319	5	32345187	32355289	c9	complement component 9	.	Any immune system process that functions in the calibrated response of an organism to a potential internal or invasive threat. [GO_REF:0000022, GOC:add, GOC:mtg_15nov05];"A protein complex produced by sequentially activated components of the complement cascade inserted into a target cell membrane and forming a pore leading to cell lysis via ion and water flow." [GOC:add, ISBN:0198547684, ISBN:068…	7	21	2565	2917	2812	722	1355	998	1406	2429	1313	-1.58496	1823.55	-0.753387	0.21809	-3.45448	0.000551363	0.00834401	1865.09	-1.04012	0.242937	-4.28146	1.8567e-05	0.000382739	2273.21	-0.587022	0.201586	-2.91202	0.00359103	0.0529008
ENSDARG00000056719	16	18974064	18998549	slc6a19b	solute carrier family 6 (neutral amino acid transporter), member 19b	.	Enables the transfer of neutral amino acids from one side of a membrane to the other. Neutral amino acids have a pH of 7. [GOC:ai, GOC:mtg_transport, ISBN:0815340729];"Enables the active transport of a solute across a membrane by a mechanism whereby two or more species are transported together in the same direction in a tightly coupled process not directly linked to a form of energy other than ch…	0	13	1046	735	885	460	278	417	887	509	693	-2	648.374	-0.662615	0.185665	-3.56887	0.000358523	0.00589788	627.574	-1.04087	0.161903	-6.42893	1.28503e-10	7.90865e-09	800.455	-0.47682	0.151821	-3.14067	0.00168561	0.0291098
ENSDARG00000016918	11	29981678	29996357	ace2	angiotensin I converting enzyme 2	.	Catalysis of the hydrolysis of peptide bonds by a mechanism in which water acts as a nucleophile, one or two metal ions hold the water molecule in place, and charged amino acid side chains are ligands for the metal ions. [GOC:mah, http://merops.sanger.ac.uk/about/glossary.htm#CATTYPE];"A lipid bilayer along with all the proteins and protein complexes embedded in it an attached to it." [GOC:dos, G…	1	47	5781	4646	4391	2415	1676	2440	4984	3249	3954	-5.55459	3678.26	-0.640143	0.177329	-3.60991	0.0003063	0.00522499	3512.87	-1.0442	0.141856	-7.36099	1.82547e-13	1.68038e-11	4544.63	-0.43633	0.136743	-3.19088	0.00141842	0.0257257
ENSDARG00000045299	21	1618181	1625976	vmo1b	vitelline membrane outer layer 1 homolog b	.	.	0	8	211	267	239	103	95	106	187	177	143	-2	167.831	-0.80255	0.14622	-5.48864	4.05049e-08	3.25721e-06	167.15	-1.05218	0.162341	-6.48133	9.09159e-11	5.72743e-09	205.896	-0.607061	0.143292	-4.23653	2.26999e-05	0.00087896
ENSDARG00000100406	11	37201483	37229533	zgc:112265	zgc:112265	.	The actions of a single gene product or complex at the molecular level consisting of a single biochemical activity or multiple causally linked biochemical activities. A given gene product may exhibit one or more molecular functions. [GOC:go_curators];"The part of a cell, extracellular environment or virus in which a gene product is located. A gene product may be located in one or more parts of a …	22	37	5151	5045	5216	2173	2202	2469	4646	4205	4168	-0.750022	3859.99	-0.638635	0.155388	-4.10993	3.95781e-05	0.00100707	3652.14	-1.05486	0.0940905	-11.2111	3.5979e-29	1.39703e-26	4763.62	-0.423847	0.0876358	-4.83645	1.32176e-06	8.00241e-05
ENSDARG00000001818	22	26129250	26175237	c3b.2	complement component c3b, tandem duplicate 2	.	Stops, prevents or reduces the activity of an endopeptidase, any enzyme that hydrolyzes nonterminal peptide bonds in polypeptides. [GOC:jl];"Any process involved in the activation of any of the steps of the complement cascade, which allows for the direct killing of microbes, the disposal of immune complexes, and the regulation of other immune processes; the initial steps of complement activation …	2	7	302	295	295	138	121	121	234	195	223	-1.80735	211.686	-0.774918	0.14826	-5.22673	1.7253e-07	1.1182e-05	208.918	-1.05739	0.154026	-6.86499	6.64949e-12	5.0179e-10	260.148	-0.580894	0.132708	-4.37724	1.20192e-05	0.000524857
ENSDARG00000042982	20	25575391	25580002	cyp2p8	cytochrome P450, family 2, subfamily P, polypeptide 8	.	Interacting selectively and non-covalently with heme, any compound of iron complexed in a porphyrin (tetrapyrrole) ring. [CHEBI:30413, GOC:ai];"Interacting selectively and non-covalently with iron (Fe) ions." [GOC:ai];"Interacting selectively and non-covalently with any metal ion." [GOC:ai];"Catalysis of an oxidation-reduction (redox) reaction in which hydrogen or electrons are transferred from e…	1	9	592	559	563	270	220	254	624	506	538	-3.16993	449.101	-0.490884	0.188771	-2.60042	0.00931099	0.0690327	403.559	-1.05999	0.131347	-8.0701	7.02385e-16	8.5228e-14	564.253	-0.22146	0.116238	-1.90523	0.0567498	0.338496
ENSDARG00000044199	6	42918933	42930302	gnat1	guanine nucleotide binding protein (G protein), alpha transducing activity polypeptide 1	.	Interacting selectively and non-covalently with a complex of G-protein beta/gamma subunits. [GOC:nln, GOC:vw];"Any process that results in a change in state or activity of a cell or an organism (in terms of movement, secretion, enzyme production, gene expression, etc.) as a result of a light stimulus, electromagnetic radiation of wavelengths classified as infrared, visible or ultraviolet light." …	0	46	1304	1275	1748	614	587	678	1100	967	1269	-2	1044.21	-0.71132	0.15374	-4.62676	3.71435e-06	0.00014348	1013.06	-1.06323	0.115106	-9.23701	2.5348e-20	4.74853e-18	1283.79	-0.514395	0.119731	-4.29624	1.73718e-05	0.000710049
ENSDARG00000022631	20	25581627	25584869	cyp2p9	cytochrome P450, family 2, subfamily P, polypeptide 9	.	Interacting selectively and non-covalently with heme, any compound of iron complexed in a porphyrin (tetrapyrrole) ring. [CHEBI:30413, GOC:ai];"Interacting selectively and non-covalently with iron (Fe) ions." [GOC:ai];"Interacting selectively and non-covalently with any metal ion." [GOC:ai];"Catalysis of an oxidation-reduction (redox) reaction in which hydrogen or electrons are transferred from e…	1	9	362	445	391	186	92	66	397	338	327	-3.16993	282.329	-0.417419	0.233865	-1.78487	0.0742821	0.283856	251.877	-1.06414	0.286038	-3.72029	0.000198997	0.00289495	377.599	-0.337598	0.123893	-2.72492	0.00643168	0.0817046
ENSDARG00000038378	15	45640906	45663081	sagb	.	.	The part of a cell, extracellular environment or virus in which a gene product is located. A gene product may be located in one or more parts of a cell and its location may be as specific as a particular macromolecular complex, that is, a stable, persistent association of macromolecules that function together. [GOC:go_curators, NIF_Subcellular:sao-1337158144];"The actions of a single gene product…	4	69	1691	1361	1621	724	642	662	1311	903	1046	-4.10852	1097.74	-0.813117	0.143251	-5.67616	1.37754e-08	1.3474e-06	1101.08	-1.06423	0.123877	-8.59099	8.62264e-18	1.35401e-15	1338.36	-0.653106	0.126027	-5.18227	2.19197e-07	1.77974e-05
ENSDARG00000058463	1	9118100	9123465	ndufab1a	NADH dehydrogenase (ubiquinone) 1, alpha/beta subcomplex, 1a	.	Interacting selectively and non-covalently with phosphopantetheine, the vitamin pantetheine 4'-(dihydrogen phosphate). [CHEBI:16858, GOC:mah, GOC:vw];"Interacting selectively and non-covalently with an acyl group, any group formally derived by removal of the hydroxyl group from the acid function of a carboxylic acid." [GOC:curators, ISBN:0198506732];"The part of the cytoplasm that does not contai…	3	10	60	101	99	32	34	30	99	98	84	-1.73697	68.5712	-0.365124	0.224708	-1.62488	0.104188	0.346045	57.9414	-1.07361	0.233376	-4.60036	4.21766e-06	0.000102123	89.3818	-0.0594673	0.178001	-0.334084	0.738316	0.954278
ENSDARG00000099276	1	9635978	9652725	ugt5b3	.	.	Catalysis of the transfer of a hexosyl group from one compound (donor) to another (acceptor). [GOC:jl];"The component of a membrane consisting of the gene products and protein complexes having at least some part of their peptide sequence embedded in the hydrophobic region of the membrane." [GOC:dos, GOC:go_curators];"Catalysis of the reaction: UDP-glucuronate + acceptor = UDP + acceptor beta-D-gl…	0	8	359	280	279	101	156	114	215	211	183	-2	210.252	-0.834192	0.172168	-4.84522	1.26469e-06	5.67726e-05	212.958	-1.07368	0.189263	-5.67293	1.4038e-08	5.86682e-07	258.948	-0.689851	0.146716	-4.70194	2.57702e-06	0.000143192
ENSDARG00000104408	14	1402558	1432954	zgc:152774	zgc:152774	.	Any process specifically pertinent to the functioning of integrated living units: cells, tissues, organs, and organisms. A process is a collection of molecular events with a defined beginning and end. [GOC:go_curators, GOC:isa_complete];"The part of a cell, extracellular environment or virus in which a gene product is located. A gene product may be located in one or more parts of a cell and its l…	1	7	48	42	46	20	8	16	24	20	14	-2.80735	26.4146	-1.08198	0.209799	-5.15721	2.50652e-07	1.50632e-05	29.3686	-1.07395	0.271592	-3.95428	7.6764e-05	0.0012939	33.2185	-0.849062	0.209118	-4.0602	4.90301e-05	0.00167277
ENSDARG00000074001	12	30842677	30846055	crygmxl2	crystallin, gamma MX, like 2	.	Any process specifically pertinent to the functioning of integrated living units: cells, tissues, organs, and organisms. A process is a collection of molecular events with a defined beginning and end. [GOC:go_curators, GOC:isa_complete];"The part of a cell, extracellular environment or virus in which a gene product is located. A gene product may be located in one or more parts of a cell and its l…	0	354	5693	5213	5723	1847	2639	2592	5083	4993	4434	-2	4176.78	-0.597114	0.178482	-3.34552	0.000821294	0.0112548	3893.02	-1.07864	0.133065	-8.1061	5.22687e-16	6.45231e-14	5211.72	-0.377542	0.0925316	-4.08014	4.50077e-05	0.00156114
ENSDARG00000003931	19	20801060	20823099	cndp2	carnosine dipeptidase 2	.	The part of a cell, extracellular environment or virus in which a gene product is located. A gene product may be located in one or more parts of a cell and its location may be as specific as a particular macromolecular complex, that is, a stable, persistent association of macromolecules that function together. [GOC:go_curators, NIF_Subcellular:sao-1337158144];"Catalysis of the hydrolysis of a dip…	21	37	1299	1189	1269	563	515	538	972	908	907	-0.817136	897.305	-0.776414	0.138423	-5.60898	2.03524e-08	1.83887e-06	882.344	-1.08447	0.113932	-9.51864	1.75453e-21	3.53488e-19	1102.02	-0.593654	0.100934	-5.88159	4.06333e-09	4.78195e-07
ENSDARG00000013963	23	6637611	6641223	mipb	major intrinsic protein of lens fiber b	lens rough;lens development in camera-type eye disrupted;lens opaque	The component of a membrane consisting of the gene products and protein complexes having at least some part of their peptide sequence embedded in the hydrophobic region of the membrane. [GOC:dos, GOC:go_curators];"Enables the transfer of water (H2O) from one side of a membrane to the other." [GOC:ai];"Enables the energy-independent facilitated diffusion, mediated by passage of a solute through a …	0	292	2020	2176	2300	663	942	1136	1928	1987	1743	-2	1623.78	-0.593772	0.182297	-3.25716	0.00112532	0.0144115	1510.87	-1.08685	0.140137	-7.75559	8.79315e-15	9.43651e-13	2031.21	-0.377578	0.0880617	-4.28766	1.80568e-05	0.000726016
ENSDARG00000051925	25	16044734	16057539	cyb5r2	cytochrome b5 reductase 2	.	The component of a membrane consisting of the gene products and protein complexes having at least some part of their peptide sequence embedded in the hydrophobic region of the membrane. [GOC:dos, GOC:go_curators];"Catalysis of an oxidation-reduction (redox) reaction, a reversible chemical reaction in which the oxidation state of an atom or atoms within a molecule is altered. One substrate acts as…	3	8	251	208	190	82	88	92	185	196	164	-1.41504	159.644	-0.631566	0.188902	-3.34335	0.000827725	0.0113284	150.116	-1.09552	0.182723	-5.9955	2.02863e-09	9.95942e-08	200.89	-0.389862	0.152597	-2.55485	0.0106233	0.115603
ENSDARG00000001870	1	1689775	1706159	atp1a1a.4	ATPase Na+/K+ transporting subunit alpha 1a, tandem duplicate 4	.	The directed movement of sodium ions (Na+) into, out of or within a cell, or between cells, by means of some agent such as a transporter or pore. [GOC:ai];"Interacting selectively and non-covalently with a nucleotide, any compound consisting of a nucleoside that is esterified with (ortho)phosphate or an oligophosphate at any hydroxyl group on the ribose or deoxyribose." [GOC:mah, ISBN:0198547684]…	26	269	10157	8207	9514	3877	4079	3859	7055	6785	6264	-3.37102	6586.59	-0.803026	0.141798	-5.66315	1.48621e-08	1.44048e-06	6527.2	-1.09907	0.118761	-9.25446	2.15321e-20	4.10571e-18	8092.11	-0.631806	0.104039	-6.07279	1.25707e-09	1.66665e-07
ENSDARG00000042620	19	770300	776076	gstr	glutathione S-transferase rho	.	The part of a cell, extracellular environment or virus in which a gene product is located. A gene product may be located in one or more parts of a cell and its location may be as specific as a particular macromolecular complex, that is, a stable, persistent association of macromolecules that function together. [GOC:go_curators, NIF_Subcellular:sao-1337158144];"Catalysis of the reaction: R-X + glu…	9	36	2191	1931	2160	804	844	1028	1209	1561	986	-2	1406.33	-0.955957	0.129957	-7.35597	1.89539e-13	7.91826e-11	1468.9	-1.10315	0.113136	-9.75069	1.83219e-22	4.11875e-20	1701.73	-0.848015	0.12876	-6.58602	4.51778e-11	8.02021e-09
ENSDARG00000038153	6	603278	609887	lgals2b	lectin, galactoside-binding, soluble, 2b	.	The part of a cell, extracellular environment or virus in which a gene product is located. A gene product may be located in one or more parts of a cell and its location may be as specific as a particular macromolecular complex, that is, a stable, persistent association of macromolecules that function together. [GOC:go_curators, NIF_Subcellular:sao-1337158144];"Interacting selectively and non-cova…	2	34	8895	7170	7653	3522	3093	3403	6283	5437	5397	-4.08746	5601.3	-0.80612	0.143947	-5.60013	2.14191e-08	1.91899e-06	5548.71	-1.11189	0.118446	-9.38731	6.15519e-21	1.20596e-18	6894.32	-0.627355	0.111139	-5.64479	1.65386e-08	1.73225e-06
ENSDARG00000032639	4	22658472	22671469	cd36	CD36 molecule (thrombospondin receptor)	.	The component of a membrane consisting of the gene products and protein complexes having at least some part of their peptide sequence embedded in the hydrophobic region of the membrane. [GOC:dos, GOC:go_curators];"A lipid bilayer along with all the proteins and protein complexes embedded in it an attached to it." [GOC:dos, GOC:mah, ISBN:0815316194];"A series of molecular signals initiated by acti…	4	21	2476	1621	1533	769	657	883	1729	1084	1261	-2.39232	1325.58	-0.760024	0.182732	-4.15922	3.19331e-05	0.000837527	1310.76	-1.11614	0.165897	-6.72794	1.72087e-11	1.2129e-09	1645.29	-0.416308	0.208524	-1.99645	0.0458846	0.299181
ENSDARG00000041925	9	11554089	11560432	cryba2b	crystallin, beta A2b	.	The actions of a single gene product or complex at the molecular level consisting of a single biochemical activity or multiple causally linked biochemical activities. A given gene product may exhibit one or more molecular functions. [GOC:go_curators];"The part of a cell, extracellular environment or virus in which a gene product is located. A gene product may be located in one or more parts of a …	5	353	8197	7271	7956	2816	3454	3482	6516	6314	5623	-6.1416	5662.35	-0.715742	0.161026	-4.44489	8.79372e-06	0.000288475	5448.22	-1.12563	0.117328	-9.59387	8.48437e-22	1.75915e-19	7036.76	-0.516789	0.0961239	-5.37628	7.60403e-08	6.72106e-06
ENSDARG00000068515	13	285874	303137	chs1	chitin synthase 1	chitin synthase activity part_of intestine lumen decreased occurrence	The component of a membrane consisting of the gene products and protein complexes having at least some part of their peptide sequence embedded in the hydrophobic region of the membrane. [GOC:dos, GOC:go_curators];"Catalysis of the transfer of a hexosyl group from one compound (donor) to another (acceptor)." [GOC:jl];"The chemical reactions and pathways resulting in the formation of chitin, a line…	3	20	1197	958	960	456	370	452	1143	761	785	-2.73697	774.232	-0.61046	0.188953	-3.23075	0.00123466	0.0154953	722.57	-1.13718	0.138448	-8.21376	2.14366e-16	2.86124e-14	973.853	-0.371224	0.139968	-2.65222	0.00799652	0.0946926
ENSDARG00000007576	14	46301973	46310549	crybb1l1	crystallin, beta B1, like 1	.	.	0	2107	21790	19886	23002	6786	9112	10143	17727	17479	14482	-2	15377.4	-0.738626	0.167644	-4.40592	1.05333e-05	0.000335228	14858.4	-1.16369	0.12696	-9.16581	4.9175e-20	8.97591e-18	19207.3	-0.549244	0.0957488	-5.7363	9.67649e-09	1.0395e-06
ENSDARG00000091560	19	684502	704000	slc6a19a.2	solute carrier family 6 (neutral amino acid transporter), member 19a, tandem duplicate 2	.	The component of the plasma membrane consisting of the gene products and protein complexes having at least some part of their peptide sequence embedded in the hydrophobic region of the membrane. [GOC:dos, GOC:go_curators];"A lipid bilayer along with all the proteins and protein complexes embedded in it an attached to it." [GOC:dos, GOC:mah, ISBN:0815316194];"The process in which a solute is trans…	0	40	1268	1068	964	456	387	479	932	728	670	-2	765.805	-0.825099	0.161886	-5.0968	3.45438e-07	1.97474e-05	760.533	-1.16972	0.140025	-8.35365	6.6186e-17	9.36072e-15	952.305	-0.633722	0.13462	-4.70748	2.50795e-06	0.000139725
ENSDARG00000024548	10	44042033	44051808	cryba4	crystallin, beta A4	.	The action of a molecule that contributes to the structural integrity of the lens of an eye. [GOC:mah]	0	984	10588	8793	9954	2909	4310	4360	7825	7928	6846	-2	6967.36	-0.731642	0.175895	-4.15954	3.1889e-05	0.0008374	6718.25	-1.1738	0.143079	-8.2039	2.32718e-16	3.06785e-14	8738.05	-0.543047	0.10337	-5.25346	1.49272e-07	1.23595e-05
ENSDARG00000103342	KN149797.1	55555	70688	wu:fa56d06	wu:fa56d06	.	.	1	12	2646	1655	2241	935	676	959	1410	931	1226	-3.58496	1406.54	-1.03441	0.153832	-6.72426	1.76486e-11	4.27638e-09	1495.62	-1.17997	0.154905	-7.6174	2.58831e-14	2.61732e-12	1723.59	-0.932603	0.147314	-6.33072	2.44027e-10	3.75498e-08
ENSDARG00000023272	20	47717389	47732703	tfap2d	transcription factor AP-2 delta (activating enhancer binding protein 2 delta)	.	Interacting selectively and non-covalently with a specific DNA sequence in order to modulate transcription by RNA polymerase II. The transcription factor may or may not also interact selectively with a protein or macromolecular complex. [GOC:txnOH];"A membrane-bounded organelle of eukaryotic cells in which chromosomes are housed and replicated. In most cells, the nucleus contains all of the cell'…	0	15	113	118	158	29	58	48	82	107	77	-2	86.5068	-0.786013	0.201325	-3.90421	9.4534e-05	0.0020527	85.4354	-1.18357	0.220253	-5.37365	7.71582e-08	2.76475e-06	110.012	-0.592794	0.169661	-3.49399	0.000475866	0.0108235
ENSDARG00000017274	11	25459697	25475403	opn1sw2	opsin 1 (cone pigments), short-wave-sensitive 2	.	The function of absorbing and responding to incidental electromagnetic radiation, particularly visible light. The response may involve a change in conformation. [GOC:ai, GOC:go_curators];"A lipid bilayer along with all the proteins and protein complexes embedded in it an attached to it." [GOC:dos, GOC:mah, ISBN:0815316194];"A series of molecular signals that proceeds with an activated receptor pr…	0	42	1300	1244	1396	465	544	562	1041	944	1055	-2	936.87	-0.744253	0.163215	-4.55995	5.11668e-06	0.000187785	902.772	-1.18501	0.115446	-10.2646	1.01787e-24	2.82307e-22	1172.62	-0.538304	0.0986626	-5.45601	4.86944e-08	4.49362e-06
ENSDARG00000088366	14	35901249	35911982	zgc:77938	zgc:77938	.	Interacting selectively and non-covalently with any metal ion. [GOC:ai];"A metabolic process that results in the removal or addition of one or more electrons to or from a substance, with or without the concomitant removal or addition of a proton or protons." [GOC:dhl, GOC:ecd, GOC:jh2, GOC:jid, GOC:mlg, GOC:rph];"Catalysis of an oxidation-reduction (redox) reaction, a reversible chemical reaction…	0	14	521	502	532	190	220	193	471	479	417	-2	384.592	-0.604098	0.190493	-3.17124	0.00151791	0.018102	354.104	-1.19642	0.139545	-8.57369	1.00217e-17	1.56222e-15	488.85	-0.356051	0.112399	-3.16773	0.00153636	0.0274027
ENSDARG00000101726	25	30385691	30429750	si:ch211-93f2.1	.	.	Catalysis of the hydrolysis of various bonds, e.g. C-O, C-N, C-C, phosphoric anhydride bonds, etc. Hydrolase is the systematic name for any enzyme of EC class 3. [ISBN:0198506732]	23	83	3399	3256	3167	1324	1302	1222	1999	2298	2018	-1.85148	2207.34	-0.943055	0.134015	-7.03695	1.96489e-12	6.44574e-10	2245.56	-1.21193	0.114096	-10.622	2.35413e-26	7.5037e-24	2732.95	-0.78684	0.102587	-7.67	1.71994e-14	4.82302e-12
ENSDARG00000012194	2	6005199	6039757	scp2a	sterol carrier protein 2a	.	Catalysis of the transfer of an acyl group from one compound (donor) to another (acceptor). [GOC:jl, ISBN:0198506732];"The chemical reactions and pathways, including anabolism and catabolism, by which living organisms transform chemical substances. Metabolic processes typically transform small molecules, but also include macromolecular processes such as DNA repair and replication, and protein syn…	26	49	2289	1889	2141	844	787	816	1481	1351	1290	-0.91427	1421.29	-0.934614	0.137952	-6.7749	1.24489e-11	3.19817e-09	1438.82	-1.22752	0.118178	-10.3871	2.83938e-25	8.42191e-23	1766.68	-0.763468	0.107506	-7.10165	1.23273e-12	2.74716e-10
ENSDARG00000098475	14	32837914	32850768	arr3b	arrestin 3b, retinal (X-arrestin)	.	The cellular process in which a signal is conveyed to trigger a change in the activity or state of a cell. Signal transduction begins with reception of a signal (e.g. a ligand binding to a receptor or receptor activation by a stimulus such as light), or for signal transduction in the absence of ligand, signal-withdrawal or the activity of a constitutively active receptor. Signal transduction ends…	3	36	1396	1569	1120	560	495	492	1298	1168	793	-3.58496	973.878	-0.609584	0.217023	-2.80884	0.00497208	0.0435298	926.32	-1.23243	0.144153	-8.5495	1.23624e-17	1.87241e-15	1234.97	-0.465621	0.144707	-3.21768	0.00129233	0.0240424
ENSDARG00000104818	25	30380705	30383617	si:ch211-93f2.1	.	.	Catalysis of the hydrolysis of various bonds, e.g. C-O, C-N, C-C, phosphoric anhydride bonds, etc. Hydrolase is the systematic name for any enzyme of EC class 3. [ISBN:0198506732]	10	21	799	781	811	323	304	285	493	525	544	-1.07039	536.332	-0.929117	0.141666	-6.55852	5.43438e-11	1.0631e-08	541.615	-1.23633	0.12527	-9.86937	5.65181e-23	1.32627e-20	668.453	-0.755436	0.108222	-6.98045	2.94245e-12	6.42068e-10
ENSDARG00000041295	16	50166421	50181206	lim2.5	lens intrinsic membrane protein 2.5	.	Any process specifically pertinent to the functioning of integrated living units: cells, tissues, organs, and organisms. A process is a collection of molecular events with a defined beginning and end. [GOC:go_curators, GOC:isa_complete];"The component of a membrane consisting of the gene products and protein complexes having at least some part of their peptide sequence embedded in the hydrophobic…	0	18	254	239	228	64	72	116	170	179	133	-2	159.708	-0.869542	0.185402	-4.69003	2.73168e-06	0.000110576	159.09	-1.28172	0.185467	-6.91079	4.81949e-12	3.68907e-10	203.44	-0.675914	0.147151	-4.59333	4.36222e-06	0.000226749
ENSDARG00000041797	20	40744754	40750953	cx28.9	connexin 28.9	.	A cellular component that forms a specialized region of connection between two or more cells or between a cell and the extracellular matrix. At a cell junction, anchoring proteins extend through the plasma membrane to link cytoskeletal proteins in one cell to cytoskeletal proteins in neighboring cells or to proteins in the extracellular matrix. [GOC:mah, http://www.vivo.colostate.edu/hbooks/cmb/c…	0	14	787	559	519	252	203	197	517	369	417	-2	421.344	-0.826329	0.191681	-4.31096	1.62544e-05	0.000476744	415.33	-1.29777	0.175554	-7.3924	1.44201e-13	1.35663e-11	537.452	-0.620676	0.153404	-4.04603	5.20933e-05	0.00175339
ENSDARG00000025595	15	34334722	34418525	agmo	alkylglycerol monooxygenase	deoxyribonucleic acid part_of whole organism increased amount	A metabolic process that results in the removal or addition of one or more electrons to or from a substance, with or without the concomitant removal or addition of a proton or protons. [GOC:dhl, GOC:ecd, GOC:jh2, GOC:jid, GOC:mlg, GOC:rph];"Interacting selectively and non-covalently with iron (Fe) ions." [GOC:ai];"Catalysis of an oxidation-reduction (redox) reaction, a reversible chemical reactio…	2	24	1118	912	860	366	274	393	721	554	597	-3.58496	638.77	-0.9343	0.167607	-5.57434	2.48474e-08	2.15756e-06	644.054	-1.3178	0.147771	-8.91788	4.75294e-19	8.38874e-17	808.15	-0.745453	0.132656	-5.61943	1.91584e-08	1.98678e-06
ENSDARG00000001993	6	40745437	40756138	myhb	myosin, heavy chain b	.	Interacting selectively and non-covalently with an actin filament, also known as F-actin, a helical filamentous polymer of globular G-actin subunits. [ISBN:0198506732];"Catalysis of the generation of force resulting either in movement along a microfilament or microtubule, or in torque resulting in membrane scission, coupled to the hydrolysis of a nucleoside triphosphate." [GOC:mah, GOC:vw, ISBN:0…	7	411	6287	5804	5468	2355	2215	1540	3110	4117	2845	-5.87564	3740.14	-1.02446	0.167515	-6.11563	9.61778e-10	1.34921e-07	3893.7	-1.32024	0.154348	-8.55367	1.19238e-17	1.83198e-15	4700.75	-0.911543	0.124756	-7.30661	2.73971e-13	6.52176e-11
ENSDARG00000056781	7	26326462	26365420	zanl	zonadhesin	.	The component of a membrane consisting of the gene products and protein complexes having at least some part of their peptide sequence embedded in the hydrophobic region of the membrane. [GOC:dos, GOC:go_curators];"A lipid bilayer along with all the proteins and protein complexes embedded in it an attached to it." [GOC:dos, GOC:mah, ISBN:0815316194]	0	69	10149	7368	7617	3134	2429	3332	7086	5180	5286	-2	5672.1	-0.764095	0.208564	-3.66361	0.000248687	0.00440062	5591.23	-1.34205	0.140818	-9.53038	1.56714e-21	3.20926e-19	7226.66	-0.648669	0.134987	-4.80541	1.54438e-06	9.11315e-05
ENSDARG00000052122	25	9003230	9009902	rag1	recombination activating gene 1	granulocyte increased amount;anatomical structure increased amount;immunoglobulin heavy chain V-D-J recombination disrupted;leukocyte part_of muscle increased amount;lymphocyte decreased amount;B cell part_of head kidney absent;cell part_of gut increased amount;integument increased amount;common myeloid progenitor part_of head kidney increased amount;mitochondrial chromosome part_of anatomical st…	The process in which immune receptor V, D, and J, or V and J gene segments, depending on the specific receptor, are recombined within a single locus utilizing the conserved heptamer and nonomer recombination signal sequences (RSS). [GOC:add, ISBN:0781700221, ISBN:0781735149];"Catalysis of the transfer of ubiquitin to a substrate protein via the reaction X-ubiquitin + S -> X + S-ubiquitin, where X…	1	11	75	74	92	21	20	28	41	44	23	-3.45943	46.1328	-1.21416	0.188318	-6.44739	1.13793e-10	2.07386e-08	50.3557	-1.36655	0.23648	-5.77874	7.52612e-09	3.34153e-07	59.4192	-0.944967	0.195345	-4.83743	1.31525e-06	7.98608e-05
ENSDARG00000014803	1	44421920	44434707	cryba1l2	crystallin, beta A1, like 2	.	Any process specifically pertinent to the functioning of integrated living units: cells, tissues, organs, and organisms. A process is a collection of molecular events with a defined beginning and end. [GOC:go_curators, GOC:isa_complete];"The actions of a single gene product or complex at the molecular level consisting of a single biochemical activity or multiple causally linked biochemical activi…	0	13	491	415	427	101	134	204	248	247	197	-2	272.631	-1.13432	0.166556	-6.81041	9.73236e-12	2.62687e-09	289.854	-1.37329	0.178879	-7.67722	1.62576e-14	1.67728e-12	345.495	-1.01975	0.13539	-7.53196	4.99836e-14	1.34238e-11
ENSDARG00000044528	6	12556427	12588044	slc15a1b	solute carrier family 15 (oligopeptide transporter), member 1b	.	Enables the transfer of neutral amino acids from one side of a membrane to the other. Neutral amino acids have a pH of 7. [GOC:ai, GOC:mtg_transport, ISBN:0815340729];"The directed movement of neutral amino acids, amino acids with no net charge, into, out of or within a cell, or between cells, by means of some agent such as a transporter or pore." [GOC:ai];"The component of a membrane consisting …	2	13	3288	2087	2033	788	459	650	1904	1208	1394	-2.70044	1523.04	-0.789845	0.232003	-3.40445	0.000662964	0.009597	1530.31	-1.3954	0.261303	-5.34016	9.28625e-08	3.2618e-06	2032.87	-0.562221	0.209049	-2.68942	0.00715762	0.0875294
ENSDARG00000104569	18	1768804	1791127	CABZ01088484.1	.	.	The chemical reactions and pathways, including anabolism and catabolism, by which living organisms transform chemical substances. Metabolic processes typically transform small molecules, but also include macromolecular processes such as DNA repair and replication, and protein synthesis and degradation. [GOC:go_curators, ISBN:0198547684];"Catalysis of the hydrolysis of various bonds, e.g. C-O, C-N…	0	31	1372	1228	1192	357	409	519	854	729	886	-2	830.51	-0.941502	0.171375	-5.49382	3.93329e-08	3.18896e-06	831.818	-1.39921	0.136047	-10.2848	8.25517e-25	2.3197e-22	1061.13	-0.753462	0.118031	-6.38361	1.72967e-10	2.72429e-08
ENSDARG00000038439	16	52512025	52516915	fabp10a	fatty acid binding protein 10a, liver basic	.	Interacting selectively and non-covalently with bile acids, any of a group of steroid carboxylic acids occurring in bile. [GOC:rph];"All of the contents of a cell excluding the plasma membrane and nucleus, but including other subcellular structures." [ISBN:0198547684];"Interacting selectively and non-covalently with a lipid." [GOC:ai]	0	75	6288	4941	6332	2114	1731	2000	2564	2618	2497	-2	3457.15	-1.3815	0.0975636	-14.16	1.61949e-45	3.45324e-41	3827.13	-1.4381	0.117985	-12.1888	3.56558e-34	2.11518e-31	4319.96	-1.29938	0.106704	-12.1774	4.1017e-34	2.14806e-30
ENSDARG00000053323	12	35051636	35070011	zgc:112285	zgc:112285	.	The hydrolysis of proteins into smaller polypeptides and/or amino acids by cleavage of their peptide bonds. [GOC:bf, GOC:mah];"Catalysis of the hydrolysis of a peptide bond. A peptide bond is a covalent bond formed when the carbon atom from the carboxyl group of one amino acid shares electrons with the nitrogen atom from the amino group of a second amino acid." [GOC:jl, ISBN:0815332181];"Catalysi…	0	54	762	717	667	186	258	229	454	577	387	-2	466.082	-0.905621	0.190941	-4.74294	2.10637e-06	8.84136e-05	462.522	-1.47079	0.151348	-9.71796	2.52785e-22	5.56545e-20	603.335	-0.712568	0.134398	-5.30193	1.14583e-07	9.63974e-06
ENSDARG00000101629	18	1837668	1925826	CABZ01079192.1	.	.	The chemical reactions and pathways involving carbohydrates, any of a group of organic compounds based of the general formula Cx(H2O)y. Includes the formation of carbohydrate derivatives by the addition of a carbohydrate residue to another molecule. [GOC:mah, ISBN:0198506732];"Catalysis of the hydrolysis of any O-glycosyl bond." [GOC:mah];"Catalysis of a biochemical reaction at physiological temp…	4	22	4565	3870	3680	1223	1131	1565	2662	2436	2657	-2.45943	2619.2	-0.975953	0.173085	-5.63858	1.71455e-08	1.60348e-06	2627.98	-1.47725	0.129159	-11.4375	2.71725e-30	1.28955e-27	3373.01	-0.783095	0.114922	-6.81412	9.48403e-12	1.89211e-09
ENSDARG00000042010	16	54450407	54455573	pklr	pyruvate kinase L/R	.	Catalysis of the reaction: ATP + pyruvate = ADP + phosphoenolpyruvate. [EC:2.7.1.40];"Interacting selectively and non-covalently with potassium (K+) ions." [GOC:mah];"The chemical reactions and pathways resulting in the breakdown of a carbohydrate into pyruvate, with the concomitant production of a small amount of ATP and the reduction of NAD(P) to NAD(P)H. Glycolysis begins with the metabolism o…	4	80	2965	2444	3126	732	1047	883	1103	1407	1138	-4.32193	1652.1	-1.36437	0.135763	-10.0497	9.21658e-24	1.40375e-20	1831.68	-1.48254	0.143177	-10.3546	3.9885e-25	1.15106e-22	2085.06	-1.30721	0.116758	-11.1959	4.2698e-29	8.13125e-26
ENSDARG00000019532	25	4133488	4148719	fads2	fatty acid desaturase 2	.	The component of a membrane consisting of the gene products and protein complexes having at least some part of their peptide sequence embedded in the hydrophobic region of the membrane. [GOC:dos, GOC:go_curators];"A lipid bilayer along with all the proteins and protein complexes embedded in it an attached to it." [GOC:dos, GOC:mah, ISBN:0815316194];"A metabolic process that results in the removal…	0	12	245	161	217	62	68	45	72	72	75	-2	114.007	-1.46839	0.1679	-8.74562	2.21798e-18	1.97058e-15	130.979	-1.48503	0.207372	-7.1612	7.99766e-13	6.62008e-11	145.36	-1.37333	0.168935	-8.12933	4.31686e-16	1.5327e-13
ENSDARG00000069018	2	22150134	22152797	cyp7a1	cytochrome P450, family 7, subfamily A, polypeptide 1	.	Catalysis of the incorporation of one atom from molecular oxygen into a compound and the reduction of the other atom of oxygen to water. [http://www.onelook.com/, ISBN:0198506732];"A metabolic process that results in the removal or addition of one or more electrons to or from a substance, with or without the concomitant removal or addition of a proton or protons." [GOC:dhl, GOC:ecd, GOC:jh2, GOC:…	0	18	1106	768	900	286	264	298	429	541	417	-2	556.019	-1.23039	0.15498	-7.93905	2.03742e-15	1.20678e-12	594.177	-1.51749	0.149682	-10.1381	3.74335e-24	9.63168e-22	712.062	-1.05604	0.140862	-7.49697	6.53075e-14	1.73172e-11
ENSDARG00000053862	12	30838167	30841679	crygmx	crystallin, gamma MX	.	.	3	186	3646	3427	3680	1030	1122	1230	2989	2627	2529	-5.9542	2432.43	-0.703062	0.217327	-3.23504	0.00121627	0.0153007	2310.22	-1.52964	0.104029	-14.7039	6.08167e-49	1.18073e-45	3177.64	-0.570755	0.0939755	-6.07344	1.25197e-09	1.66665e-07
ENSDARG00000019294	7	73453486	73455918	cbln8	cerebellin 8	.	Any process specifically pertinent to the functioning of integrated living units: cells, tissues, organs, and organisms. A process is a collection of molecular events with a defined beginning and end. [GOC:go_curators, GOC:isa_complete];"The actions of a single gene product or complex at the molecular level consisting of a single biochemical activity or multiple causally linked biochemical activi…	0	0	54	23	28	0	5	4	5	3	2	0	14.2188	-1.57876	0.233686	-6.75593	NA	NA	18.7675	-1.59858	0.296138	-5.39809	6.73556e-08	2.4505e-06	20.5757	-1.25889	0.210185	-5.98945	2.10555e-09	2.72266e-07
ENSDARG00000057460	9	22091161	22092089	crygm2d13	crystallin, gamma M2d13	.	The part of a cell, extracellular environment or virus in which a gene product is located. A gene product may be located in one or more parts of a cell and its location may be as specific as a particular macromolecular complex, that is, a stable, persistent association of macromolecules that function together. [GOC:go_curators, NIF_Subcellular:sao-1337158144]	0	266	10127	8776	9768	2300	2970	2991	5958	6562	5455	-2	6032.78	-0.907809	0.20839	-4.3563	1.32282e-05	0.000405264	6038.77	-1.62616	0.124268	-13.0859	3.96638e-39	3.38824e-36	7900.54	-0.822047	0.101801	-8.07507	6.74393e-16	2.20737e-13
ENSDARG00000089310	5	45677781	45725008	gc	group-specific component (vitamin D binding protein)	.	Enables the transfer of a vitamin from one side of a membrane to the other. [GOC:tb];"The process in which a vitamin is transported across a membrane. A vitamin is one of a number of unrelated organic substances that occur in many foods in small amounts and that are necessary in trace amounts for the normal metabolic functioning of the body." [GOC:bf];"Interacting selectively and non-covalently w…	0	13	1924	1587	1825	509	515	495	841	897	766	-2	1037.92	-1.35432	0.136546	-9.91848	3.45971e-23	4.61071e-20	1121.35	-1.64288	0.123982	-13.2509	4.45655e-40	4.32609e-37	1340.3	-1.19859	0.111151	-10.7835	4.11975e-27	7.19171e-24
ENSDARG00000016793	1	44439661	44448387	crybb1l2	crystallin, beta B1, like 2	.	Any process specifically pertinent to the functioning of integrated living units: cells, tissues, organs, and organisms. A process is a collection of molecular events with a defined beginning and end. [GOC:go_curators, GOC:isa_complete];"The actions of a single gene product or complex at the molecular level consisting of a single biochemical activity or multiple causally linked biochemical activi…	0	1417	17111	15479	16981	3379	5320	4832	9191	11500	8340	-2	10138.3	-0.940759	0.21422	-4.39155	1.12545e-05	0.00035343	10312.9	-1.66512	0.144179	-11.549	7.47181e-31	3.62654e-28	13336	-0.900168	0.111912	-8.04353	8.72859e-16	2.81302e-13
ENSDARG00000076790	9	22157282	22158325	crygm2d16	crystallin, gamma M2d16	.	Any process specifically pertinent to the functioning of integrated living units: cells, tissues, organs, and organisms. A process is a collection of molecular events with a defined beginning and end. [GOC:go_curators, GOC:isa_complete];"The part of a cell, extracellular environment or virus in which a gene product is located. A gene product may be located in one or more parts of a cell and its l…	0	49	2842	2106	2386	582	751	636	1090	1455	968	-2	1422.7	-1.27085	0.173571	-7.32175	2.44749e-13	9.66442e-11	1525.69	-1.68409	0.148543	-11.3374	8.56919e-30	3.81258e-27	1857.2	-1.11785	0.137968	-8.10224	5.3957e-16	1.82305e-13
ENSDARG00000073742	16	26017360	26018694	prss59.2	protease, serine, 59, tandem duplicate 2	.	Catalysis of the hydrolysis of peptide bonds in a polypeptide chain by a catalytic mechanism that involves a catalytic triad consisting of a serine nucleophile that is activated by a proton relay involving an acidic residue (e.g. aspartate or glutamate) and a basic residue (usually histidine). [http://merops.sanger.ac.uk/about/glossary.htm#CATTYPE, ISBN:0716720094];"The hydrolysis of proteins int…	0	23	15696	10229	11549	3160	2861	3523	6482	5054	6223	-2	7191.99	-1.3122	0.174015	-7.54074	4.67303e-14	2.16615e-11	7711.72	-1.77688	0.145906	-12.1782	4.06015e-34	2.34348e-31	9483.9	-1.13265	0.139089	-8.14334	3.84527e-16	1.38881e-13
ENSDARG00000007276	5	26111596	26118855	ela3l	elastase 3 like	.	Catalysis of the hydrolysis of peptide bonds in a polypeptide chain by a catalytic mechanism that involves a catalytic triad consisting of a serine nucleophile that is activated by a proton relay involving an acidic residue (e.g. aspartate or glutamate) and a basic residue (usually histidine). [http://merops.sanger.ac.uk/about/glossary.htm#CATTYPE, ISBN:0716720094];"That part of a multicellular o…	0	10	6199	3631	4395	917	374	685	1490	958	1541	-2	2260.65	-1.47515	0.229494	-6.42783	1.29438e-10	2.3e-08	2646.52	-1.79308	0.282228	-6.35328	2.10776e-10	1.24691e-08	3176.47	-1.21482	0.209104	-5.80962	6.26139e-09	6.93988e-07
ENSDARG00000094310	8	6954984	6958173	si:ch211-255g12.6	.	.	.	0	147	4365	3936	4047	404	909	727	1839	2522	1649	-2	2246.69	-0.886504	0.234664	-3.77776	0.000158243	0.00307587	2344.57	-1.80919	0.263708	-6.86058	6.85801e-12	5.15703e-10	3136.02	-1.11822	0.127647	-8.76025	1.94816e-18	9.71668e-16
ENSDARG00000069826	9	22116600	22117430	crygm2d15	crystallin, gamma M2d15	.	The part of a cell, extracellular environment or virus in which a gene product is located. A gene product may be located in one or more parts of a cell and its location may be as specific as a particular macromolecular complex, that is, a stable, persistent association of macromolecules that function together. [GOC:go_curators, NIF_Subcellular:sao-1337158144]	0	122	2524	2022	2290	481	582	647	981	1277	1044	-2	1310.96	-1.29986	0.173237	-7.50334	6.22114e-14	2.76361e-11	1396.2	-1.81326	0.132587	-13.676	1.41342e-42	1.58868e-39	1733.64	-1.13809	0.12253	-9.28821	1.56912e-20	1.06032e-17
ENSDARG00000112287	22	254390	263117	zgc:66156	.	.	Interacting selectively and non-covalently with a nucleotide, any compound consisting of a nucleoside that is esterified with (ortho)phosphate or an oligophosphate at any hydroxyl group on the ribose or deoxyribose. [GOC:mah, ISBN:0198547684];"Interacting selectively and non-covalently with monomeric or multimeric forms of actin, including actin filaments." [GOC:clt];"Catalysis of movement along …	0	46	2321	1996	2015	559	523	509	1389	1172	1270	-2	1292.25	-0.918793	0.219383	-4.18808	2.81327e-05	0.000759334	1296.32	-1.81455	0.126157	-14.3832	6.59301e-47	9.38669e-44	1726.04	-0.860374	0.112135	-7.67264	1.68487e-14	4.82302e-12
ENSDARG00000087301	9	22146301	22158784	crygm2d14	crystallin, gamma M2d14	.	The part of a cell, extracellular environment or virus in which a gene product is located. A gene product may be located in one or more parts of a cell and its location may be as specific as a particular macromolecular complex, that is, a stable, persistent association of macromolecules that function together. [GOC:go_curators, NIF_Subcellular:sao-1337158144];"The actions of a single gene product…	0	147	4315	3695	4082	861	1099	933	1924	2472	1726	-2	2330.99	-1.09734	0.212742	-5.15808	2.49492e-07	1.50632e-05	2448.53	-1.86492	0.13192	-14.1367	2.25682e-45	2.67759e-42	3106.74	-1.07899	0.121385	-8.88899	6.16661e-19	3.31226e-16
[truncated: 18 more rows]
