# Supplementary material for: RNA exosome mutations in pontocerebellar hypoplasia alter ribosome biogenesis and p53 levels
Source: Life Sci Alliance. 2020 Jun 11;3(8):e202000678. doi: 10.26508/lsa.202000678 (PMC7295610; doi:10.26508/lsa.202000678)
Supplement: Supplementary file 3 [file LSA-2020-00678_TableS3.xlsx]

## Sheet: SuppTab3 - Zebrafish nonCoding
RNA type	GeneName	ENSEMBL GENE ID	exosc8.Reads	exosc9.Reads	Control.Reads	exosc8.Log2	exosc9.Log2
lincRNA	BX571954.2	ENSDARG00000103538	66.4752	20.9526	6	3.46978	1.8041
lincRNA	BX927318.1	ENSDARG00000097713	37.5263	42.7783	4	3.22983	3.41881
lincRNA	BX465205.1	ENSDARG00000097139	33.2376	40.1592	5	2.73282	3.00573
lincRNA	CU459186.7	ENSDARG00000105407	110.435	126.589	17	2.69958	2.89654
lincRNA	CU927934.1	ENSDARG00000097054	39.6707	13.9684	7	2.50265	0.996742
lincRNA	CR936462.1	ENSDARG00000117211	1995.33	1129.7	354	2.4948	1.67411
lincRNA	BX663613.2	ENSDARG00000117521	10.7218	12.2224	2	2.42248	2.61145
lincRNA	CABZ01078244.2	ENSDARG00000117339	810.568	503.736	152	2.41486	1.7286
lincRNA	CU927934.3	ENSDARG00000098037	113.651	31.4289	23	2.30491	0.45046
lincRNA	BX296520.1	ENSDARG00000096646	26.8045	17.4605	6	2.15944	1.54106
lincRNA	BX545917.1	ENSDARG00000117303	73.9804	42.7783	18	2.03915	1.24888
lincRNA	FP017274.1	ENSDARG00000097369	231.591	202.542	58	1.99745	1.8041
lincRNA	CABZ01056275.1	ENSDARG00000117210	115.795	69.8421	29	1.99745	1.26804
lincRNA	CR318658.1	ENSDARG00000097133	15.0105	16.5875	4	1.9079	2.05202
lincRNA	CU929294.2	ENSDARG00000117392	17.1549	17.4605	5	1.77862	1.8041
lincRNA	BX545917.3	ENSDARG00000117401	188.704	105.636	58	1.702	0.864979
lincRNA	BX545917.5	ENSDARG00000117624	32.1654	45.3974	10	1.68551	2.18261
lincRNA	CU693368.1	ENSDARG00000094247	45.0316	48.8895	15	1.58597	1.70456
lincRNA	si:dkey-208c12.2	ENSDARG00000097567	202.642	148.414	68	1.57533	1.12603
lincRNA	CR788235.1	ENSDARG00000097800	274.478	219.13	93	1.56139	1.23648
lincRNA	BX545917.4	ENSDARG00000117554	102.929	62.8579	35	1.55623	0.844739
lincRNA	CU695222.2	ENSDARG00000117426	20.3714	11.3493	7	1.54112	0.697182
lincRNA	BX571853.1	ENSDARG00000097388	788.052	615.484	273	1.52939	1.17282
lincRNA	BX957362.1	ENSDARG00000105682	201.57	172.859	70	1.52585	1.30417
lincRNA	FP236327.1	ENSDARG00000105402	19.2992	13.9684	7	1.46312	0.996742
lincRNA	FO834903.1	ENSDARG00000117459	16.0827	24.4447	6	1.42248	2.02649
lincRNA	si:dkey-188h10.3	ENSDARG00000097737	699.061	505.482	277	1.33553	0.867774
lincRNA	CU929568.2	ENSDARG00000104873	55.7534	29.6829	23	1.27742	0.367998
lincRNA	BX890562.2	ENSDARG00000095951	19.2992	11.3493	8	1.27047	0.504537
lincRNA	CU682640.1	ENSDARG00000117543	98.6405	85.5566	41	1.26656	1.06125
lincRNA	BX545917.2	ENSDARG00000117355	54.6812	62.8579	23	1.24941	1.45046
lincRNA	BX323573.1	ENSDARG00000117456	35.3819	9.60329	15	1.23805	-0.643362
lincRNA	CU929037.3	ENSDARG00000097798	37.5263	20.9526	16	1.22983	0.389059
lincRNA	AL929294.1	ENSDARG00000117323	13.9383	13.0954	6	1.21602	1.12603
lincRNA	BX465205.2	ENSDARG00000097604	54.6812	64.6039	24	1.18801	1.42859
lincRNA	BX927369.1	ENSDARG00000105047	18.2271	11.3493	8	1.18801	0.504537
lincRNA	CABZ01034851.1	ENSDARG00000117574	49.3203	13.0954	22	1.16468	-0.748444
lincRNA	CR385078.3	ENSDARG00000096729	188.704	108.255	86	1.13371	0.332028
lincRNA	BX324212.1	ENSDARG00000098127	2357.72	94.2868	1086	1.11837	-3.52582
lincRNA	CR361564.1	ENSDARG00000105420	607.926	515.085	283	1.10309	0.86401
lincRNA	BX927068.1	ENSDARG00000096503	12.8662	13.0954	6	1.10055	1.12603
lincRNA	BX323041.1	ENSDARG00000104012	42.8872	30.5559	20	1.10055	0.611452
lincRNA	CABZ01070527.1	ENSDARG00000104600	27.8767	20.0796	13	1.10055	0.627219
lincRNA	CU329666.1	ENSDARG00000105623	45.0316	21.8257	21	1.10055	0.0556357
lincRNA	BX005389.1	ENSDARG00000117272	10.7218	11.3493	5	1.10055	1.18261
lincRNA	CABZ01016692.1	ENSDARG00000117675	64.3308	44.5243	31	1.05324	0.522326
lincRNA	FO704745.1	ENSDARG00000102488	49.3203	15.7145	24	1.03915	-0.610941
lincRNA	CR381621.1	ENSDARG00000097748	114.723	101.271	56	1.03466	0.854723
lincRNA	CR762407.3	ENSDARG00000117697	65.403	19.2066	32	1.03128	-0.736471
lincRNA	CU463109.1	ENSDARG00000092709	151.177	179.843	74	1.03064	1.28114
lincRNA	BX323031.1	ENSDARG00000098668	32.1654	46.2704	16	1.00744	1.53202
lincRNA	AL954695.1	ENSDARG00000053731	62.1864	61.9849	31	1.00433	0.999648
lincRNA	CU657976.1	ENSDARG00000095081	57.8977	14.8414	29	0.997453	-0.966421
lincRNA	BX001023.2	ENSDARG00000101163	229.446	162.383	115	0.996524	0.497766
lincRNA	CR790382.1	ENSDARG00000100671	25.7323	19.2066	13	0.98507	0.563089
lincRNA	CR847994.1	ENSDARG00000097341	232.663	206.034	118	0.979455	0.804097
lincRNA	AL772382.1	ENSDARG00000097122	58.9699	35.7941	30	0.975016	0.254758
lincRNA	BX936431.1	ENSDARG00000103487	64.3308	67.223	33	0.963043	1.02649
lincRNA	BX465205.3	ENSDARG00000097775	88.9909	50.6355	46	0.952024	0.138516
lincRNA	AL954703.1	ENSDARG00000117314	19.2992	8.73026	10	0.948544	-0.195903
lincRNA	CU151886.1	ENSDARG00000117784	38.5985	18.3336	20	0.948544	-0.125514
lincRNA	CR385035.1	ENSDARG00000097163	1873.1	2004.47	974	0.943433	1.04123
lincRNA	BX545917.6	ENSDARG00000117654	165.116	143.176	86	0.941069	0.735384
lincRNA	CT573793.3	ENSDARG00000104445	102.929	47.1434	54	0.930622	-0.195903
lincRNA	CR381689.1	ENSDARG00000097277	2594.68	2716.86	1370	0.921378	0.987763
lincRNA	CABZ01068050.1	ENSDARG00000117600	22.5158	19.2066	12	0.907902	0.678566
lincRNA	BX511128.2	ENSDARG00000101493	51.4646	41.0322	28	0.878155	0.551331
lincRNA	CU928129.1	ENSDARG00000097815	2840.2	2057.72	1567	0.85799	0.393044
lincRNA	AL772219.1	ENSDARG00000117701	328.087	261.908	182	0.85014	0.525121
lincRNA	AL954695.3	ENSDARG00000094127	55.7534	45.3974	31	0.84679	0.55034
lincRNA	BX465862.4	ENSDARG00000096147	2995.67	3470.28	1669	0.843895	1.05607
lincRNA	CR932360.2	ENSDARG00000096780	21.4436	19.2066	12	0.837513	0.678566
lincRNA	CR753876.1	ENSDARG00000097137	1629.71	1073.82	915	0.832775	0.230912
lincRNA	BX539313.1	ENSDARG00000097396	318.437	293.337	179	0.83105	0.712599
lincRNA	CABZ01086755.1	ENSDARG00000117712	492.131	229.606	278	0.823956	-0.275925
lincRNA	BX547930.2	ENSDARG00000096513	35.3819	21.8257	20	0.823013	0.126025
lincRNA	CU929418.1	ENSDARG00000099091	65.403	13.9684	37	0.821831	-1.40536
lincRNA	BX571705.1	ENSDARG00000096496	235.88	181.589	135	0.805091	0.427721
lincRNA	BX545917.7	ENSDARG00000117811	100.785	79.4454	58	0.797155	0.453911
lincRNA	BX936305.1	ENSDARG00000094135	36.4541	22.6987	21	0.795692	0.112219
lincRNA	BX572622.1	ENSDARG00000096383	17.1549	6.11118	10	0.778619	-0.710476
lincRNA	CABZ01078350.1	ENSDARG00000098711	123.301	113.493	72	0.776112	0.65654
lincRNA	BX004769.1	ENSDARG00000097970	54.6812	32.302	32	0.772972	0.0135503
lincRNA	CT476811.1	ENSDARG00000099471	2723.34	2465.43	1597	0.770011	0.626473
lincRNA	CR931782.1	ENSDARG00000097455	57.8977	40.1592	34	0.767972	0.240196
lincRNA	CR790382.2	ENSDARG00000101230	69.6917	36.6671	41	0.765363	-0.161138
lincRNA	CR790362.1	ENSDARG00000096864	43.9594	38.4132	26	0.757659	0.563089
lincRNA	AL954322.2	ENSDARG00000097072	793.413	751.676	471	0.752345	0.674383
lincRNA	BX548018.1	ENSDARG00000098744	151.177	63.7309	90	0.748245	-0.497932
lincRNA	BX255917.1	ENSDARG00000093696	464.254	297.702	277	0.745028	0.103983
lincRNA	CR381647.1	ENSDARG00000097211	1931	1768.75	1154	0.742702	0.616088
lincRNA	BX571809.2	ENSDARG00000117774	51.4646	48.8895	31	0.731313	0.657256
lincRNA	si:dkeyp-73a2.2	ENSDARG00000079785	24.6601	9.60329	15	0.717218	-0.643362
lincRNA	BX640453.1	ENSDARG00000117305	73.9804	46.2704	45	0.717218	0.0401643
lincRNA	BX000981.12	ENSDARG00000117620	151.177	110.874	92	0.716536	0.26922
lincRNA	BX681416.1	ENSDARG00000096551	27.8767	29.6829	17	0.713524	0.804097
lincRNA	CU927934.2	ENSDARG00000097095	27.8767	8.73026	17	0.713524	-0.961438
lincRNA	CU693494.1	ENSDARG00000087516	34.3098	34.048	21	0.70823	0.697182
lincRNA	CU929203.1	ENSDARG00000099575	34.3098	14.8414	21	0.70823	-0.500758
lincRNA	CU137681.2	ENSDARG00000097623	47.1759	59.3658	29	0.701998	1.03358
lincRNA	CR812472.1	ENSDARG00000097087	53.609	60.2388	33	0.700009	0.868227
lincRNA	CABZ01070747.1	ENSDARG00000117546	5105.72	4706.48	3147	0.698137	0.580673
lincRNA	BX649442.1	ENSDARG00000086963	16.0827	2.61908	10	0.685509	-1.93287
lincRNA	BX548046.1	ENSDARG00000096232	135.095	90.7947	84	0.685509	0.112219
lincRNA	CR855311.2	ENSDARG00000096848	16.0827	34.048	10	0.685509	1.76757
lincRNA	CR936975.1	ENSDARG00000096862	22.5158	7.85724	14	0.685509	-0.833333
lincRNA	CR759816.1	ENSDARG00000098977	61.1143	47.1434	38	0.685509	0.311057
lincRNA	CR848661.1	ENSDARG00000097638	494.275	265.4	310	0.673046	-0.2241
lincRNA	CR548622.2	ENSDARG00000105448	164.044	148.414	104	0.657495	0.513048
lincRNA	BX901962.1	ENSDARG00000096009	26.8045	38.4132	17	0.65694	1.17607
lincRNA	CU651668.1	ENSDARG00000117400	825.579	1006.6	526	0.650343	0.936355
lincRNA	BX323800.1	ENSDARG00000117706	40.7428	51.5085	26	0.648035	0.9863
lincRNA	CU207269.3	ENSDARG00000117754	142.6	84.6835	91	0.648035	-0.103785
lincRNA	CR751602.1	ENSDARG00000094128	1486.04	1270.25	949	0.646994	0.420636
lincRNA	CR936518.2	ENSDARG00000097882	507.141	414.687	324	0.646393	0.356031
lincRNA	BX511195.1	ENSDARG00000097749	140.456	178.97	90	0.642117	0.991724
lincRNA	CABZ01071845.1	ENSDARG00000117363	400.995	237.463	257	0.641817	-0.114065
lincRNA	CABZ01075319.1	ENSDARG00000117465	34.3098	28.8099	22	0.641115	0.389059
lincRNA	BX005043.1	ENSDARG00000102162	113.651	72.4612	73	0.638643	-0.0106882
lincRNA	BX248097.3	ENSDARG00000117467	31.0932	24.4447	20	0.6366	0.289524
lincRNA	CR354564.2	ENSDARG00000117315	27.8767	19.2066	18	0.631062	0.0936035
lincRNA	BX601644.4	ENSDARG00000117399	13.9383	14.8414	9	0.631062	0.721635
lincRNA	CR450786.1	ENSDARG00000117730	13.9383	15.7145	9	0.631062	0.804097
lincRNA	BX537277.3	ENSDARG00000117762	5938.8	4448.94	3840	0.629066	0.212356
lincRNA	AL645792.1	ENSDARG00000103274	21.4436	15.7145	14	0.61512	0.166667
lincRNA	BX908401.1	ENSDARG00000099876	32.1654	20.0796	21	0.61512	-0.0646585
lincRNA	LO018022.2	ENSDARG00000117737	169.404	128.335	111	0.609912	0.209353
lincRNA	CU929339.2	ENSDARG00000097460	1997.47	1810.66	1312	0.606407	0.464745
lincRNA	BX571880.1	ENSDARG00000097533	4003.52	3308.77	2632	0.605109	0.330135
lincRNA	BX908750.1	ENSDARG00000097553	3100.74	2830.35	2042	0.602632	0.470998
lincRNA	BX957347.1	ENSDARG00000117257	462.11	426.91	305	0.599426	0.485122
lincRNA	FP340271.1	ENSDARG00000097399	51.4646	36.6671	34	0.598047	0.108952
lincRNA	BX511078.1	ENSDARG00000117505	33.2376	27.0638	22	0.595312	0.298862
lincRNA	CU469541.1	ENSDARG00000096538	81.4857	74.2072	54	0.593587	0.4586
lincRNA	BX324006.2	ENSDARG00000117224	70.7639	46.2704	47	0.590352	-0.0225715
lincRNA	FP101882.1	ENSDARG00000098121	1450.66	1354.06	964	0.589604	0.490191
lincRNA	CU466285.1	ENSDARG00000092808	15.0105	22.6987	10	0.585974	1.18261
lincRNA	BX649485.4	ENSDARG00000095820	30.021	33.175	20	0.585974	0.730096
lincRNA	CR385050.3	ENSDARG00000117756	15.0105	1.74605	10	0.585974	-2.51783
lincRNA	BX663533.1	ENSDARG00000117799	214.436	123.097	143	0.584532	-0.216223
lincRNA	FO082779.2	ENSDARG00000117281	117.94	119.605	79	0.578126	0.598348
lincRNA	FP017215.1	ENSDARG00000097714	707.639	477.545	475	0.575085	0.00771025
lincRNA	LO017816.1	ENSDARG00000117408	84.7022	92.5408	57	0.571438	0.699127
lincRNA	AL928854.1	ENSDARG00000105454	57.8977	75.9533	39	0.570032	0.961638
lincRNA	CABZ01030033.1	ENSDARG00000117613	57.8977	79.4454	39	0.570032	1.02649
lincRNA	BX005229.1	ENSDARG00000117455	66.4752	39.2862	45	0.56289	-0.195903
lincRNA	CABZ01078767.1	ENSDARG00000117816	132.95	107.382	90	0.56289	0.254758
lincRNA	BX323444.1	ENSDARG00000117674	47.1759	28.8099	32	0.559979	-0.151509
lincRNA	CU929143.1	ENSDARG00000099967	969.251	510.72	660	0.554404	-0.369932
lincRNA	CU137681.4	ENSDARG00000097945	377.407	211.272	258	0.548751	-0.288267
lincRNA	BX663611.1	ENSDARG00000092277	48.2481	25.3178	33	0.548006	-0.382316
lincRNA	BX927244.2	ENSDARG00000117705	16.0827	25.3178	11	0.548006	1.20265
lincRNA	BX927317.3	ENSDARG00000117757	20.3714	13.9684	14	0.54112	-0.003258
lincRNA	AL953848.2	ENSDARG00000117585	1460.31	794.454	1006	0.537643	-0.340595
lincRNA	FP236157.6	ENSDARG00000117457	49.3203	27.0638	34	0.536646	-0.32917
lincRNA	BX640481.1	ENSDARG00000095385	1238.37	1370.65	857	0.531073	0.677494
lincRNA	AL935145.2	ENSDARG00000097045	46.1037	39.2862	32	0.526812	0.29595
lincRNA	CU929154.1	ENSDARG00000100687	143.672	150.161	100	0.52278	0.586505
lincRNA	BX569793.1	ENSDARG00000096832	157.61	127.462	110	0.51886	0.212562
lincRNA	AL928650.1	ENSDARG00000079332	25.7323	43.6513	18	0.515584	1.27803
lincRNA	BX957333.2	ENSDARG00000096101	17.1549	11.3493	12	0.515584	-0.0804259
lincRNA	BX323557.1	ENSDARG00000097931	17.1549	2.61908	12	0.515584	-2.1959
lincRNA	CR855274.1	ENSDARG00000100787	51.4646	52.3816	36	0.515584	0.541063
lincRNA	BX511128.3	ENSDARG00000102706	1943.86	1812.4	1360	0.515319	0.414297
lincRNA	CABZ01072245.1	ENSDARG00000117448	1759.45	1594.15	1233	0.512949	0.370611
lincRNA	CU693494.2	ENSDARG00000097118	12855.4	13931.8	9062	0.504477	0.620475
lincRNA	CR925777.1	ENSDARG00000097810	127.589	131.827	90	0.503512	0.550649
lincRNA	BX323444.2	ENSDARG00000117710	39.6707	41.9053	28	0.502645	0.581705
lincRNA	FO904966.1	ENSDARG00000117266	210.147	234.844	149	0.496088	0.656391
lincRNA	BX936406.2	ENSDARG00000097659	18.2271	15.7145	13	0.48757	0.273582
lincRNA	CR513789.1	ENSDARG00000103270	36.4541	49.7625	26	0.48757	0.936547
lincRNA	BX663516.2	ENSDARG00000102689	595.06	619.849	425	0.485572	0.544453
lincRNA	AL954145.2	ENSDARG00000117560	50.3925	64.6039	36	0.485211	0.843625
lincRNA	CU076099.1	ENSDARG00000097666	160.827	152.78	115	0.483876	0.409818
lincRNA	FO904898.6	ENSDARG00000117742	60.0421	50.6355	43	0.481637	0.235813
lincRNA	FO704909.1	ENSDARG00000117638	379.552	260.162	272	0.48069	-0.0641974
lincRNA	BX842699.1	ENSDARG00000093557	3742.98	3444.96	2684	0.479803	0.360103
lincRNA	CR352228.1	ENSDARG00000097895	13.9383	13.9684	10	0.479059	0.482169
lincRNA	CU280645.1	ENSDARG00000098326	236.952	201.669	170	0.479059	0.246455
lincRNA	CU019562.2	ENSDARG00000101381	13.9383	4.36513	10	0.479059	-1.1959
lincRNA	CABZ01072084.1	ENSDARG00000117504	321.654	280.241	232	0.471385	0.272545
lincRNA	BX465864.1	ENSDARG00000094148	109.362	87.3026	79	0.469192	0.144172
lincRNA	AL954695.2	ENSDARG00000079925	62.1864	63.7309	45	0.466675	0.502068
lincRNA	FP236476.1	ENSDARG00000117466	298.066	230.479	216	0.464601	0.0936035
lincRNA	CABZ01083943.1	ENSDARG00000117240	1683.32	1343.59	1220	0.46443	0.139209
lincRNA	BX005459.1	ENSDARG00000097395	57.8977	35.7941	42	0.463117	-0.230668
lincRNA	CR354549.12	ENSDARG00000117793	19.2992	20.9526	14	0.463117	0.581705
lincRNA	CU463284.2	ENSDARG00000117542	34.3098	20.9526	25	0.456691	-0.254797
lincRNA	FQ377991.1	ENSDARG00000117563	117.94	72.4612	86	0.455642	-0.247128
lincRNA	BX005183.3	ENSDARG00000097610	4478.5	3942.59	3267	0.455048	0.271176
lincRNA	CR925817.1	ENSDARG00000088362	39.6707	40.1592	29	0.452019	0.469678
lincRNA	BX957251.1	ENSDARG00000097971	15.0105	1.74605	11	0.44847	-2.65533
lincRNA	BX908796.7	ENSDARG00000115344	45.0316	27.0638	33	0.44847	-0.286101
lincRNA	CABZ01072309.2	ENSDARG00000117646	2387.74	1928.51	1752	0.446646	0.138488
lincRNA	BX088547.1	ENSDARG00000105242	486.77	493.26	358	0.44328	0.462388
lincRNA	CU137681.3	ENSDARG00000097694	81.4857	58.4928	60	0.441584	-0.0367045
lincRNA	CR388052.1	ENSDARG00000095998	66.4752	60.2388	49	0.440033	0.297912
lincRNA	AL935145.1	ENSDARG00000096400	66.4752	35.7941	49	0.440033	-0.453061
lincRNA	BX088707.3	ENSDARG00000117253	7216.84	6995.56	5325	0.438586	0.393658
lincRNA	BX294160.1	ENSDARG00000097868	51.4646	48.0164	38	0.437582	0.337529
lincRNA	BX323051.1	ENSDARG00000099065	68.6195	55.0007	51	0.428122	0.108952
lincRNA	CR774189.1	ENSDARG00000096544	10.7218	13.0954	8	0.422475	0.710988
lincRNA	CR318589.1	ENSDARG00000104351	42.8872	45.3974	32	0.422475	0.504537
lincRNA	CT573247.1	ENSDARG00000095941	64.3308	47.1434	48	0.422475	-0.0259781
lincRNA	BX470116.1	ENSDARG00000117423	64.3308	53.2546	48	0.422475	0.149872
lincRNA	BX571811.2	ENSDARG00000105655	202.642	142.303	152	0.414862	-0.0951024
lincRNA	CABZ01043503.1	ENSDARG00000117472	402.067	343.099	302	0.412889	0.184078
lincRNA	CT027805.1	ENSDARG00000097316	143.672	126.589	108	0.411749	0.229119
lincRNA	BX927081.4	ENSDARG00000117309	183.343	240.082	138	0.409875	0.79886
lincRNA	CU929144.1	ENSDARG00000117760	2199.04	1303.43	1659	0.406561	-0.348003
lincRNA	BX901907.2	ENSDARG00000096478	719.433	730.723	543	0.405908	0.428372
lincRNA	BX908803.3	ENSDARG00000117681	22.5158	18.3336	17	0.405402	0.108952
lincRNA	CU929145.2	ENSDARG00000097268	241.24	217.384	183	0.398628	0.248399
lincRNA	CR387984.1	ENSDARG00000097978	1383.11	1261.52	1051	0.396155	0.263404
lincRNA	CT583672.1	ENSDARG00000098691	868.466	703.659	660	0.396003	0.0924107
lincRNA	AL928657.1	ENSDARG00000097119	686.195	694.056	523	0.391808	0.408241
lincRNA	BX005399.2	ENSDARG00000117375	35.3819	37.5401	27	0.390054	0.475474
lincRNA	BX950855.1	ENSDARG00000103815	88.9909	103.89	68	0.388124	0.611452
lincRNA	CABZ01063971.1	ENSDARG00000117814	1349.87	1194.3	1033	0.385985	0.209325
lincRNA	CR812468.1	ENSDARG00000100608	454.604	474.053	348	0.385524	0.445962
lincRNA	CABZ01089081.1	ENSDARG00000117516	30.021	24.4447	23	0.38434	0.0878899
lincRNA	BX908803.2	ENSDARG00000117250	24.6601	28.8099	19	0.376181	0.600564
lincRNA	CR847563.2	ENSDARG00000117477	73.9804	76.8263	57	0.376181	0.430639
lincRNA	BX569788.1	ENSDARG00000100967	219.797	203.415	170	0.370636	0.258892
lincRNA	BX571737.1	ENSDARG00000097112	1280.18	1255.41	993	0.366484	0.338295
lincRNA	CR391990.1	ENSDARG00000094142	32.1654	34.921	25	0.363581	0.482169
lincRNA	BX957344.1	ENSDARG00000096358	38.5985	44.5243	30	0.363581	0.569632
lincRNA	AL928650.2	ENSDARG00000096526	12.8662	16.5875	10	0.363581	0.730096
lincRNA	CT033842.1	ENSDARG00000097972	25.7323	27.0638	20	0.363581	0.436365
lincRNA	BX548024.2	ENSDARG00000098052	90.0631	109.128	70	0.363581	0.640598
lincRNA	CABZ01058277.1	ENSDARG00000105373	70.7639	68.096	55	0.363581	0.308139
lincRNA	CABZ01113830.1	ENSDARG00000117370	25.7323	18.3336	20	0.363581	-0.125514
lincRNA	CR589875.3	ENSDARG00000117553	25.7323	23.5717	20	0.363581	0.237056
lincRNA	BX324206.2	ENSDARG00000097663	150.105	124.843	117	0.359465	0.0936035
lincRNA	BX005402.1	ENSDARG00000117529	255.179	182.462	199	0.35874	-0.125169
lincRNA	CR388209.1	ENSDARG00000091901	380.624	328.258	297	0.357903	0.144367
lincRNA	BX649350.2	ENSDARG00000117743	243.385	212.145	190	0.35724	0.159054
lincRNA	CR848683.1	ENSDARG00000097135	875.971	852.074	684	0.356887	0.316982
lincRNA	BX649485.1	ENSDARG00000087623	33.2376	20.0796	26	0.354304	-0.372781
lincRNA	CABZ01085662.1	ENSDARG00000117530	705.494	655.643	554	0.348749	0.243024
lincRNA	FO704741.1	ENSDARG00000105665	20.3714	14.8414	16	0.348474	-0.10844
lincRNA	CU467042.1	ENSDARG00000117642	631.514	639.055	497	0.345569	0.362695
lincRNA	BX537313.1	ENSDARG00000117587	76.1248	75.0803	60	0.343403	0.323471
lincRNA	FP016019.1	ENSDARG00000099107	244.457	206.034	193	0.34098	0.0942829
lincRNA	CABZ01075068.1	ENSDARG00000117538	119.012	138.811	94	0.340374	0.562391
lincRNA	CU466287.1	ENSDARG00000093473	165.116	164.129	131	0.333911	0.325263
lincRNA	CT030017.2	ENSDARG00000117262	585.41	573.578	465	0.332217	0.30276
lincRNA	BX649431.3	ENSDARG00000105244	954.24	976.043	758	0.332154	0.364747
lincRNA	AL935300.2	ENSDARG00000097519	28.9489	20.0796	23	0.331873	-0.195903
lincRNA	FP236157.7	ENSDARG00000117555	73.9804	54.1276	59	0.326428	-0.12435
lincRNA	AL844563.1	ENSDARG00000099436	15.0105	9.60329	12	0.322939	-0.321434
lincRNA	CU019647.1	ENSDARG00000104386	52.5368	44.5243	42	0.322939	0.0842048
lincRNA	CR407561.2	ENSDARG00000117404	22.5158	24.4447	18	0.322939	0.441527
lincRNA	AL807749.2	ENSDARG00000117785	15.0105	21.8257	12	0.322939	0.862991
lincRNA	CABZ01064941.1	ENSDARG00000117393	2388.82	2470.66	1911	0.321968	0.370571
lincRNA	CR759927.1	ENSDARG00000093172	83.63	63.7309	67	0.31986	-0.0721677
lincRNA	FP102969.1	ENSDARG00000101412	137.239	132.7	110	0.319187	0.270665
lincRNA	CT030153.1	ENSDARG00000105620	114.723	120.478	92	0.318452	0.389059
lincRNA	BX510657.1	ENSDARG00000093899	1374.53	1081.68	1103	0.31751	-0.0281597
lincRNA	CABZ01077121.1	ENSDARG00000117617	208.003	256.67	167	0.316756	0.620065
lincRNA	CR352226.5	ENSDARG00000100000	1802.33	1378.51	1448	0.315805	-0.0709535
lincRNA	CU019646.1	ENSDARG00000117632	31.0932	24.4447	25	0.314672	-0.0324043
lincRNA	BX537296.5	ENSDARG00000117823	1341.3	974.297	1080	0.312597	-0.148597
lincRNA	CR786571.4	ENSDARG00000097419	117.94	91.6678	95	0.312051	-0.0515132
lincRNA	BX000991.1	ENSDARG00000092282	79.3413	75.9533	64	0.31	0.24704
lincRNA	CR925719.1	ENSDARG00000117486	95.424	95.1599	77	0.309494	0.305495
lincRNA	CABZ01071909.1	ENSDARG00000117524	209.075	165.002	169	0.306998	-0.0345401
lincRNA	BX511078.2	ENSDARG00000117791	32.1654	34.921	26	0.306998	0.425585
lincRNA	FO818704.2	ENSDARG00000117361	2952.78	2593.76	2387	0.306877	0.119847
lincRNA	BX640537.3	ENSDARG00000109263	1161.17	847.708	941	0.303314	-0.150627
lincRNA	CABZ01072563.1	ENSDARG00000117592	24.6601	17.4605	20	0.302181	-0.195903
lincRNA	BX914220.1	ENSDARG00000098603	192.992	183.336	157	0.297779	0.223722
lincRNA	CR381686.4	ENSDARG00000096121	151.177	176.351	123	0.297584	0.519794
lincRNA	CR376825.1	ENSDARG00000117475	296.994	230.479	242	0.295426	-0.0703722
lincRNA	CU469493.1	ENSDARG00000096742	17.1549	26.1908	14	0.293192	0.903633
lincRNA	BX088649.2	ENSDARG00000117412	42.8872	32.302	35	0.293192	-0.115733
lincRNA	CR354549.8	ENSDARG00000117683	17.1549	16.5875	14	0.293192	0.24467
lincRNA	CABZ01068352.1	ENSDARG00000117692	85.7744	64.6039	70	0.293192	-0.115733
lincRNA	BX005484.1	ENSDARG00000097167	353.819	336.115	289	0.291944	0.217886
lincRNA	CU929073.1	ENSDARG00000104824	250.89	254.051	205	0.291432	0.309492
lincRNA	CU207269.4	ENSDARG00000117825	112.579	82.9375	92	0.291231	-0.149609
lincRNA	CABZ01043166.1	ENSDARG00000117476	208.003	167.621	170	0.291069	-0.0203315
lincRNA	CU468915.1	ENSDARG00000097044	355.964	336.115	291	0.290711	0.207936
lincRNA	BX890562.1	ENSDARG00000093924	503.925	449.609	412	0.290563	0.126025
lincRNA	FO834799.2	ENSDARG00000117369	1656.52	1682.32	1355	0.289861	0.312161
lincRNA	BX572620.1	ENSDARG00000099809	219.797	165.002	180	0.288174	-0.125514
lincRNA	LO018296.1	ENSDARG00000117584	79.3413	81.1914	65	0.287633	0.320888
lincRNA	BX649442.2	ENSDARG00000097108	1642.58	1483.27	1346	0.287285	0.140104
lincRNA	CR926130.2	ENSDARG00000117818	4212.59	4362.51	3458	0.284771	0.335221
lincRNA	CU914144.1	ENSDARG00000096626	98.6405	89.9217	81	0.284259	0.150747
lincRNA	CABZ01085626.1	ENSDARG00000117294	188.704	140.557	155	0.283854	-0.141111
lincRNA	CR381664.1	ENSDARG00000096190	136.167	89.9217	112	0.281877	-0.316757
lincRNA	CR339059.4	ENSDARG00000117690	145.816	153.653	120	0.281119	0.356638
lincRNA	CABZ01088275.1	ENSDARG00000117379	100.785	82.9375	83	0.280096	-0.0010869
lincRNA	CABZ01070579.1	ENSDARG00000117759	165.116	156.272	136	0.279871	0.20045
lincRNA	CU694380.2	ENSDARG00000117497	46.1037	38.4132	38	0.278884	0.015601
lincRNA	CABZ01059623.1	ENSDARG00000117243	942.446	716.755	777	0.278496	-0.116435
lincRNA	BX296516.1	ENSDARG00000096595	27.8767	19.2066	23	0.277425	-0.260033
lincRNA	BX936364.1	ENSDARG00000097764	27.8767	40.1592	23	0.277425	0.804097
lincRNA	BX004812.1	ENSDARG00000096968	83.63	90.7947	69	0.277425	0.396012
lincRNA	CABZ01040021.1	ENSDARG00000117458	1784.11	1645.65	1473	0.276445	0.159904
lincRNA	BX547928.1	ENSDARG00000117277	1278.04	1237.95	1056	0.275321	0.229345
lincRNA	BX005421.1	ENSDARG00000044235	244.457	251.432	202	0.275226	0.31581
lincRNA	CR339059.3	ENSDARG00000117605	143.672	150.161	119	0.271818	0.335544
lincRNA	CU179656.2	ENSDARG00000117230	172.621	187.701	143	0.271593	0.392418
lincRNA	si:ch211-181p13.2	ENSDARG00000096484	1305.92	1478.91	1082	0.271361	0.45083
lincRNA	BX936456.1	ENSDARG00000117300	57.8977	73.3342	48	0.270472	0.611452
lincRNA	BX640522.2	ENSDARG00000117256	454.604	442.624	377	0.270047	0.231518
lincRNA	CABZ01113467.1	ENSDARG00000117575	166.188	118.732	138	0.268147	-0.216965
lincRNA	CABZ01087025.2	ENSDARG00000117437	334.52	510.72	278	0.267008	0.877449
lincRNA	BX465868.1	ENSDARG00000095950	551.1	459.212	458	0.266968	0.00381213
lincRNA	CABZ01087025.3	ENSDARG00000117669	340.953	523.816	284	0.263683	0.883168
lincRNA	AL929378.1	ENSDARG00000117372	656.174	583.182	547	0.262538	0.0924042
lincRNA	CR388095.1	ENSDARG00000102917	560.75	350.084	468	0.260849	-0.418809
lincRNA	CR927050.2	ENSDARG00000099669	102.929	69.8421	86	0.259245	-0.30024
lincRNA	CU571064.1	ENSDARG00000098815	448.171	369.29	375	0.257159	-0.022136
lincRNA	zgc:195356	ENSDARG00000099134	41.815	27.0638	35	0.256666	-0.37099
lincRNA	CU104777.1	ENSDARG00000097886	436.377	322.147	366	0.253732	-0.184126
lincRNA	CR762475.4	ENSDARG00000105304	10.7218	20.9526	9	0.25255	1.21913
lincRNA	CU855948.1	ENSDARG00000117336	128.662	116.986	108	0.25255	0.115299
lincRNA	CR457444.7	ENSDARG00000117340	32.1654	42.7783	27	0.25255	0.663919
lincRNA	CABZ01068177.1	ENSDARG00000117812	572.544	513.339	481	0.25135	0.0938762
lincRNA	BX546503.1	ENSDARG00000103536	65.403	70.7151	55	0.249925	0.362587
lincRNA	CU463109.2	ENSDARG00000117738	1557.88	1398.59	1311	0.248914	0.0933034
lincRNA	BX322618.1	ENSDARG00000096508	10723.9	10811.6	9032	0.247718	0.259457
lincRNA	BX649485.2	ENSDARG00000095801	33.2376	33.175	28	0.247388	0.24467
lincRNA	CABZ01012962.1	ENSDARG00000103039	55.7534	55.0007	47	0.246398	0.226788
lincRNA	BX005421.3	ENSDARG00000114309	480.337	437.386	405	0.246124	0.110986
lincRNA	CR936968.1	ENSDARG00000096295	156.538	170.24	132	0.245977	0.367033
lincRNA	CT956002.1	ENSDARG00000101772	22.5158	18.3336	19	0.244937	-0.0515132
lincRNA	CT033796.2	ENSDARG00000096518	384.913	451.355	325	0.244091	0.473821
lincRNA	AL845550.1	ENSDARG00000097342	4755.12	4132.03	4018	0.243004	0.0403743
lincRNA	CR848703.1	ENSDARG00000117733	194.065	147.541	164	0.242841	-0.152576
lincRNA	BX005183.2	ENSDARG00000097382	68.6195	55.0007	58	0.242566	-0.0766041
lincRNA	CR759797.2	ENSDARG00000117460	242.313	208.653	205	0.241246	0.0254836
lincRNA	BX908796.3	ENSDARG00000110990	406.356	341.353	344	0.240336	-0.011143
lincRNA	CU104743.1	ENSDARG00000117449	328.087	266.273	278	0.238994	-0.0621787
lincRNA	BX324181.2	ENSDARG00000117223	11.794	4.36513	10	0.23805	-1.1959
lincRNA	BX649417.1	ENSDARG00000117387	11.794	2.61908	10	0.23805	-1.93287
lincRNA	CABZ01052527.1	ENSDARG00000117667	11.794	11.3493	10	0.23805	0.182609
lincRNA	CR944667.3	ENSDARG00000117685	11.794	8.73026	10	0.23805	-0.195903
lincRNA	CT737129.1	ENSDARG00000101284	260.54	256.67	221	0.237457	0.215867
lincRNA	CABZ01100396.1	ENSDARG00000117409	48.2481	52.3816	41	0.234848	0.353436
lincRNA	CU914602.1	ENSDARG00000097575	84.7022	92.5408	72	0.234403	0.362092
lincRNA	CABZ01101984.1	ENSDARG00000117616	84.7022	64.6039	72	0.234403	-0.156375
lincRNA	CR318600.2	ENSDARG00000105780	24.6601	38.4132	21	0.231792	0.871211
lincRNA	BX571772.1	ENSDARG00000117557	1001.42	859.058	853	0.231424	0.0102095
lincRNA	BX248331.2	ENSDARG00000102650	440.666	381.512	376	0.228953	0.0209975
lincRNA	CU469568.4	ENSDARG00000097951	443.882	461.831	379	0.22798	0.285167
lincRNA	BX901898.1	ENSDARG00000096540	102.929	52.3816	88	0.226078	-0.748444
lincRNA	BX324177.1	ENSDARG00000104394	60256.5	54413.1	51580	0.224305	0.0771424
lincRNA	BX927341.6	ENSDARG00000117651	1266.24	950.726	1084	0.224191	-0.189264
lincRNA	CR391963.1	ENSDARG00000096833	248.746	245.32	213	0.223818	0.203814
lincRNA	CR751608.1	ENSDARG00000096796	52.5368	49.7625	45	0.223404	0.145134
lincRNA	CU466287.2	ENSDARG00000097526	108.29	112.62	93	0.2196	0.276165
lincRNA	CR376857.1	ENSDARG00000117769	801.991	721.993	689	0.219081	0.0674803
lincRNA	CABZ01010098.1	ENSDARG00000117245	775.186	720.247	666	0.21902	0.112969
lincRNA	CU074421.1	ENSDARG00000096414	300.21	313.416	258	0.218603	0.28071
lincRNA	LO017700.2	ENSDARG00000117647	168.332	172.859	145	0.215259	0.253544
lincRNA	gpx2	ENSDARG00000089149	98.6405	82.9375	85	0.214718	-0.0354384
lincRNA	CR854839.1	ENSDARG00000097006	456.749	475.799	394	0.213205	0.272158
lincRNA	FP236513.1	ENSDARG00000104099	220.869	247.066	191	0.209619	0.371326
lincRNA	CR354610.2	ENSDARG00000117341	73.9804	59.3658	64	0.209071	-0.10844
lincRNA	BX548046.2	ENSDARG00000096270	419.222	381.512	363	0.207746	0.0717607
lincRNA	BX248126.1	ENSDARG00000096552	422.439	400.719	366	0.206899	0.130747
lincRNA	CABZ01078607.1	ENSDARG00000117552	136.167	139.684	118	0.206589	0.243382
lincRNA	CR388421.1	ENSDARG00000096706	1165.46	1030.17	1010	0.206544	0.0285285
lincRNA	CR407547.1	ENSDARG00000117572	122.229	100.398	106	0.205517	-0.0783335
lincRNA	CR383662.6	ENSDARG00000097175	1080.76	1120.09	938	0.204383	0.255958
lincRNA	CU693502.1	ENSDARG00000097467	247.674	228.733	215	0.204103	0.0893271
lincRNA	CABZ01079281.1	ENSDARG00000117609	139.383	167.621	121	0.204052	0.470196
lincRNA	FP102052.2	ENSDARG00000117611	673.329	672.23	585	0.202875	0.200519
lincRNA	BX088705.1	ENSDARG00000117595	47.1759	48.0164	41	0.202427	0.227905
lincRNA	CR812470.2	ENSDARG00000097313	3395.59	3378.61	2954	0.200994	0.193761
lincRNA	CABZ01043506.2	ENSDARG00000117251	383.84	330.877	334	0.200658	-0.0135533
lincRNA	CT573494.1	ENSDARG00000068085	538.234	463.577	469	0.198646	-0.0167791
lincRNA	BX511025.1	ENSDARG00000102446	334.52	249.686	292	0.196125	-0.225856
lincRNA	AL935269.1	ENSDARG00000117790	184.415	89.0487	161	0.195895	-0.854395
lincRNA	BX470117.1	ENSDARG00000117749	17.1549	10.4763	15	0.193656	-0.517831
lincRNA	AL954672.1	ENSDARG00000105627	781.619	823.264	684	0.192469	0.267358
lincRNA	BX571843.1	ENSDARG00000100283	3285.16	3194.4	2875	0.192401	0.151984
lincRNA	LO017718.1	ENSDARG00000117216	2749.07	3403.06	2406	0.192307	0.500194
lincRNA	BX936342.2	ENSDARG00000097724	629.37	605.88	551	0.191855	0.13698
lincRNA	AL929349.1	ENSDARG00000096520	105.074	117.859	92	0.191695	0.357351
lincRNA	CR356236.1	ENSDARG00000102040	3684.01	3378.61	3226	0.191531	0.0666841
lincRNA	CT025588.2	ENSDARG00000117228	175.838	154.526	154	0.191312	0.00491594
lincRNA	BX664614.1	ENSDARG00000097944	352.747	350.957	309	0.191028	0.183686
lincRNA	FQ790211.1	ENSDARG00000117549	2492.82	2372.01	2184	0.190805	0.119139
lincRNA	BX649411.2	ENSDARG00000105079	319.51	244.447	280	0.190432	-0.195903
lincRNA	AL929307.1	ENSDARG00000105542	92.2075	90.7947	81	0.186962	0.164687
lincRNA	FQ312013.1	ENSDARG00000099473	55.7534	54.1276	49	0.186277	0.143583
lincRNA	BX248243.1	ENSDARG00000098100	113.651	104.763	100	0.184611	0.0671313
lincRNA	CU467823.1	ENSDARG00000117299	19.2992	25.3178	17	0.183009	0.574615
lincRNA	BX510929.1	ENSDARG00000117567	649.741	644.293	573	0.18133	0.169183
lincRNA	BX927122.1	ENSDARG00000100571	79.3413	59.3658	70	0.180717	-0.237723
lincRNA	BX248521.1	ENSDARG00000105339	39.6707	41.9053	35	0.180717	0.259776
lincRNA	BX119926.1	ENSDARG00000117776	120.084	110.001	106	0.179981	0.0534564
lincRNA	CABZ01113815.1	ENSDARG00000117329	2050.01	1906.69	1810	0.17964	0.0750801
lincRNA	BX537274.2	ENSDARG00000117490	100.785	104.763	89	0.179402	0.235254
lincRNA	FO704721.2	ENSDARG00000117425	284.128	236.59	251	0.178852	-0.0852976
lincRNA	CU660013.2	ENSDARG00000096723	40.7428	27.0638	36	0.178549	-0.411632
lincRNA	CU660013.3	ENSDARG00000096785	40.7428	24.4447	36	0.178549	-0.558473
lincRNA	AL844192.1	ENSDARG00000100356	61.1143	57.6197	54	0.178549	0.0936035
lincRNA	CU469577.1	ENSDARG00000102850	205.859	233.098	182	0.177715	0.356998
lincRNA	AL935174.6	ENSDARG00000117464	1298.41	1228.35	1148	0.177623	0.0975966
lincRNA	CR376774.1	ENSDARG00000105809	560.75	555.245	496	0.177018	0.162784
lincRNA	LO018183.1	ENSDARG00000117293	270.189	285.48	239	0.17696	0.256377
lincRNA	CU856621.2	ENSDARG00000095970	41.815	20.0796	37	0.176496	-0.881794
lincRNA	CT573344.1	ENSDARG00000093108	3336.62	2994.48	2954	0.175719	0.0196357
lincRNA	FP067440.1	ENSDARG00000100154	21.4436	21.8257	19	0.174548	0.200026
lincRNA	LO018205.3	ENSDARG00000117736	21.4436	15.7145	19	0.174548	-0.273906
lincRNA	CR936479.1	ENSDARG00000117523	476.048	416.434	422	0.173864	-0.0191568
lincRNA	CABZ01117357.1	ENSDARG00000117519	221.941	212.145	197	0.171982	0.106858
lincRNA	CR812470.1	ENSDARG00000092632	3655.06	3700.76	3245	0.171677	0.189602
lincRNA	CU633785.1	ENSDARG00000093355	45.0316	53.2546	40	0.170936	0.412906
lincRNA	BX324006.3	ENSDARG00000117331	182.271	117.859	162	0.170088	-0.458937
lincRNA	FP016106.1	ENSDARG00000098397	624.009	549.134	555	0.169078	-0.0153308
lincRNA	CT030005.1	ENSDARG00000099249	278.767	232.225	248	0.168718	-0.0948169
lincRNA	CU571382.5	ENSDARG00000113546	23.588	17.4605	21	0.167661	-0.266292
lincRNA	BX908796.6	ENSDARG00000114685	47.1759	40.1592	42	0.167661	-0.0646585
lincRNA	CR932999.1	ENSDARG00000117461	1629.71	1508.59	1452	0.166577	0.0551587
lincRNA	CR388417.2	ENSDARG00000117682	144.744	124.843	129	0.166135	-0.047259
lincRNA	LO017793.1	ENSDARG00000117499	122.229	113.493	109	0.165253	0.0582804
lincRNA	CR381618.1	ENSDARG00000096887	14919.4	12609.1	13305	0.165219	-0.0775011
lincRNA	BX649398.3	ENSDARG00000117252	24.6601	30.5559	22	0.164677	0.473948
lincRNA	CR384099.1	ENSDARG00000089193	4102.16	4030.76	3663	0.163358	0.138027
lincRNA	BX640549.1	ENSDARG00000098000	104.001	110.874	93	0.161301	0.253623
lincRNA	CABZ01068359.1	ENSDARG00000117763	78.2691	79.4454	70	0.161089	0.182609
lincRNA	CU074330.1	ENSDARG00000100755	738.732	804.93	661	0.160401	0.284213
lincRNA	BX571811.1	ENSDARG00000105621	81.4857	59.3658	73	0.15865	-0.298265
lincRNA	FO834828.2	ENSDARG00000117450	1947.08	2271.61	1745	0.158084	0.380491
lincRNA	CR749163.2	ENSDARG00000096736	85.7744	98.652	77	0.155689	0.357489
lincRNA	BX571762.2	ENSDARG00000097962	2654.72	2603.36	2385	0.154569	0.126388
lincRNA	CABZ01079804.1	ENSDARG00000117619	120.084	298.575	108	0.153014	1.46706
lincRNA	BX005302.1	ENSDARG00000117797	60.0421	61.1118	54	0.153014	0.178492
lincRNA	CU571318.1	ENSDARG00000097048	1062.53	1065.09	956	0.152421	0.155896
lincRNA	FO907087.1	ENSDARG00000117753	31.0932	27.0638	28	0.151173	-0.0490617
lincRNA	CU062501.2	ENSDARG00000103967	231.591	227.86	209	0.148075	0.124644
lincRNA	CABZ01118767.1	ENSDARG00000117371	200.498	162.383	181	0.147596	-0.15659
lincRNA	CU302321.2	ENSDARG00000117570	269.117	257.543	243	0.147278	0.0838556
lincRNA	FO681323.1	ENSDARG00000117485	5251.54	5516.65	4742	0.147244	0.218298
lincRNA	FP016234.1	ENSDARG00000100246	202.642	243.574	183	0.14709	0.412518
lincRNA	CABZ01086029.1	ENSDARG00000117419	476.048	481.037	430	0.14677	0.161813
lincRNA	CABZ01057364.2	ENSDARG00000117447	511.43	499.371	462	0.146643	0.112219
lincRNA	CR932362.1	ENSDARG00000096781	243.385	262.781	220	0.145736	0.256357
lincRNA	CT573006.1	ENSDARG00000096761	394.562	394.608	357	0.144329	0.144496
lincRNA	CU463231.2	ENSDARG00000117238	108.29	117.859	98	0.144049	0.266203
lincRNA	zgc:194207	ENSDARG00000097799	258.395	211.272	234	0.143072	-0.147405
lincRNA	BX294178.3	ENSDARG00000117509	595.06	666.992	539	0.142749	0.307384
lincRNA	CR847984.1	ENSDARG00000096876	75.0526	70.7151	68	0.142367	0.0564841
lincRNA	CR450748.1	ENSDARG00000099158	1163.32	1045.89	1056	0.139632	-0.013885
lincRNA	CR391995.1	ENSDARG00000098041	127.589	137.065	116	0.137384	0.240737
lincRNA	BX901952.1	ENSDARG00000096758	42.8872	41.0322	39	0.137073	0.0732836
lincRNA	LO018104.1	ENSDARG00000117310	43.9594	26.1908	40	0.136171	-0.610941
lincRNA	BX000463.2	ENSDARG00000117817	263.756	211.272	240	0.136171	-0.18393
lincRNA	BX571712.3	ENSDARG00000098050	93.2796	84.6835	85	0.1341	-0.00538117
lincRNA	BX001047.1	ENSDARG00000117798	49.3203	20.0796	45	0.132256	-1.16419
lincRNA	FP236457.1	ENSDARG00000117367	50.3925	57.6197	46	0.131574	0.324929
lincRNA	CR352218.1	ENSDARG00000117356	337.737	335.242	309	0.128292	0.117596
lincRNA	BX901957.1	ENSDARG00000098363	176.91	186.828	162	0.127019	0.205714
lincRNA	CU638870.1	ENSDARG00000097425	122.229	113.493	112	0.126082	0.0191098
lincRNA	BX663606.1	ENSDARG00000096429	66.4752	54.1276	61	0.124006	-0.172444
lincRNA	BX323453.1	ENSDARG00000100563	2280.53	1524.3	2094	0.123106	-0.458111
lincRNA	FP340497.1	ENSDARG00000117292	213.364	202.542	196	0.122462	0.0473681
lincRNA	AL929216.1	ENSDARG00000117377	374.191	389.37	344	0.121365	0.178732
lincRNA	AL732488.1	ENSDARG00000096717	1211.56	1652.64	1114	0.121121	0.569022
lincRNA	BX530721.1	ENSDARG00000097873	238.024	168.494	219	0.120176	-0.378233
lincRNA	CR925763.1	ENSDARG00000092592	81.4857	77.6993	75	0.119656	0.0510117
lincRNA	FP016235.1	ENSDARG00000097673	433.161	361.433	399	0.118514	-0.142661
lincRNA	CR388040.1	ENSDARG00000096713	187.631	171.986	173	0.11713	-0.00847948
lincRNA	CR388156.1	ENSDARG00000099543	99.7127	92.5408	92	0.116144	0.00845542
lincRNA	BX569785.1	ENSDARG00000097667	209.075	176.351	193	0.11542	-0.130149
lincRNA	FO904870.1	ENSDARG00000117500	119.012	100.398	110	0.113603	-0.131773
lincRNA	BX511161.1	ENSDARG00000092272	807.351	800.565	748	0.110159	0.0979804
lincRNA	LO017841.1	ENSDARG00000117782	198.353	153.653	184	0.108366	-0.260033
lincRNA	CR376745.1	ENSDARG00000096922	1329.5	1428.27	1236	0.105208	0.208591
lincRNA	CU571074.1	ENSDARG00000096770	1013.21	1069.46	942	0.105134	0.18308
lincRNA	CABZ01015815.5	ENSDARG00000105800	431.016	407.703	401	0.10414	0.0239172
lincRNA	BX649485.3	ENSDARG00000095803	13.9383	14.8414	13	0.100547	0.19112
lincRNA	AL928920.4	ENSDARG00000096812	11.794	13.9684	11	0.100547	0.344665
lincRNA	BX323807.1	ENSDARG00000096878	26.8045	30.5559	25	0.100547	0.289524
lincRNA	BX927282.2	ENSDARG00000096925	23.588	20.9526	22	0.100547	-0.0703722
lincRNA	BX005392.2	ENSDARG00000096996	55.7534	56.7467	52	0.100547	0.126025
lincRNA	CU929037.2	ENSDARG00000097188	12.8662	15.7145	12	0.100547	0.389059
lincRNA	BX324206.1	ENSDARG00000097206	172.621	171.986	161	0.100547	0.0952319
lincRNA	CR354430.3	ENSDARG00000097946	12.8662	15.7145	12	0.100547	0.389059
lincRNA	CU861469.1	ENSDARG00000099253	47.1759	55.0007	44	0.100547	0.321945
lincRNA	FQ311879.2	ENSDARG00000099503	12.8662	12.2224	12	0.100547	0.0264893
lincRNA	AL928901.1	ENSDARG00000100960	36.4541	33.175	34	0.100547	-0.0354384
lincRNA	BX927317.1	ENSDARG00000101136	16.0827	16.5875	15	0.100547	0.145134
lincRNA	BX005396.3	ENSDARG00000101166	10.7218	13.0954	10	0.100547	0.389059
lincRNA	CR354581.1	ENSDARG00000105764	15.0105	21.8257	14	0.100547	0.640598
lincRNA	FP245526.1	ENSDARG00000117365	48.2481	42.7783	45	0.100547	-0.0730463
lincRNA	AL928866.2	ENSDARG00000117398	22.5158	23.5717	21	0.100547	0.166667
lincRNA	CR556712.1	ENSDARG00000117418	16.0827	17.4605	15	0.100547	0.219134
lincRNA	CABZ01079873.1	ENSDARG00000117527	83.63	96.9059	78	0.100547	0.313111
lincRNA	LO017955.2	ENSDARG00000117631	11.794	9.60329	11	0.100547	-0.195903
lincRNA	CABZ01066320.2	ENSDARG00000117666	16.0827	16.5875	15	0.100547	0.145134
lincRNA	BX908744.2	ENSDARG00000117807	42.8872	49.7625	40	0.100547	0.315059
lincRNA	BX248418.1	ENSDARG00000096569	335.592	337.861	314	0.0959451	0.105666
lincRNA	CABZ01058723.1	ENSDARG00000117748	278.767	265.4	261	0.0950088	0.0241184
lincRNA	CABZ01056843.1	ENSDARG00000117747	8078.88	7675.65	7572	0.0934801	0.0196139
lincRNA	CABZ01038697.1	ENSDARG00000117349	632.586	659.135	593	0.0932298	0.152541
lincRNA	BX511261.1	ENSDARG00000117227	372.046	337.861	349	0.0922556	-0.0467965
lincRNA	CR383662.7	ENSDARG00000111380	181.198	197.304	170	0.0920355	0.214885
lincRNA	CABZ01015815.1	ENSDARG00000099099	4881.64	4558.94	4580	0.0920168	-0.00664821
lincRNA	CR388143.1	ENSDARG00000093449	169.404	160.637	159	0.0914448	0.0147759
lincRNA	CU207269.2	ENSDARG00000117307	226.23	152.78	213	0.0869365	-0.479402
lincRNA	BX005005.1	ENSDARG00000117551	414.934	386.751	391	0.0857119	-0.015765
lincRNA	CT990567.2	ENSDARG00000101682	98.6405	70.7151	93	0.0849501	-0.395212
lincRNA	CABZ01067657.1	ENSDARG00000117241	188.704	185.955	178	0.0842452	0.0630731
lincRNA	CABZ01064670.1	ENSDARG00000117824	1156.88	1126.2	1093	0.0819484	0.0431746
lincRNA	BX901907.1	ENSDARG00000096434	244.457	268.019	231	0.0816879	0.214443
lincRNA	BX908796.1	ENSDARG00000097616	78.2691	59.3658	74	0.0809182	-0.317894
lincRNA	BX950217.1	ENSDARG00000097967	234.807	223.495	222	0.0809182	0.00968106
lincRNA	CR759918.1	ENSDARG00000096877	679.762	657.389	643	0.0802111	0.0319281
lincRNA	FP102783.1	ENSDARG00000105109	344.17	359.687	326	0.0782483	0.141869
lincRNA	BX005308.1	ENSDARG00000117483	540.379	587.547	512	0.0778269	0.19856
lincRNA	BX005058.1	ENSDARG00000092599	710.855	763.898	674	0.0768072	0.180631
lincRNA	FP102073.1	ENSDARG00000097618	703.35	703.659	667	0.076556	0.07719
lincRNA	BX601644.5	ENSDARG00000117583	247.674	249.686	235	0.0757791	0.0874513
lincRNA	CABZ01068362.1	ENSDARG00000117696	58.9699	63.7309	56	0.0745518	0.186567
lincRNA	CABZ01113369.1	ENSDARG00000117740	556.461	577.943	529	0.0730138	0.12766
lincRNA	CABZ01058362.1	ENSDARG00000117229	274.478	249.686	261	0.072641	-0.0639377
lincRNA	CU855895.1	ENSDARG00000098684	104.001	96.0329	99	0.0711032	-0.0439
lincRNA	CR457444.6	ENSDARG00000105259	145.816	123.097	139	0.0690687	-0.175293
lincRNA	CABZ01066224.1	ENSDARG00000117217	190.848	183.336	182	0.0684858	0.0105478
lincRNA	CU633855.1	ENSDARG00000097542	236.952	202.542	226	0.0682706	-0.158101
lincRNA	CABZ01073015.1	ENSDARG00000117581	47.1759	40.1592	45	0.0681255	-0.164194
lincRNA	CABZ01102517.1	ENSDARG00000117626	312.004	305.559	298	0.0662538	0.0361395
lincRNA	CABZ01068273.1	ENSDARG00000105718	132.95	124.843	127	0.0660586	-0.0247164
lincRNA	CR376776.2	ENSDARG00000117209	124.373	136.192	119	0.0637102	0.194681
lincRNA	CR786571.3	ENSDARG00000097023	605.782	590.166	580	0.0627449	0.0250673
lincRNA	CABZ01067348.1	ENSDARG00000117691	6768.67	7339.53	6487	0.0613213	0.178137
lincRNA	CU694481.1	ENSDARG00000100577	261.612	311.67	251	0.0597408	0.312334
lincRNA	CABZ01057364.1	ENSDARG00000117413	287.344	286.353	276	0.0581117	0.0531245
lincRNA	BX511311.2	ENSDARG00000097557	69.6917	59.3658	67	0.0568256	-0.174529
lincRNA	CR391910.3	ENSDARG00000097773	160.827	175.478	155	0.0532413	0.179024
lincRNA	BX927394.3	ENSDARG00000117618	30.021	35.7941	29	0.0499209	0.303668
lincRNA	BX323884.1	ENSDARG00000091897	1607.2	1066.84	1554	0.0485608	-0.542645
lincRNA	FQ790208.1	ENSDARG00000101048	57.8977	82.9375	56	0.0480796	0.566598
lincRNA	CU984583.1	ENSDARG00000101819	28.9489	36.6671	28	0.0480796	0.389059
lincRNA	CR786577.1	ENSDARG00000097875	4400.23	4558.07	4260	0.0467243	0.0975697
lincRNA	BX682556.1	ENSDARG00000097595	27.8767	26.1908	27	0.0460992	-0.0439
lincRNA	CU467862.1	ENSDARG00000097786	27.8767	29.6829	27	0.0460992	0.136672
lincRNA	FO393424.4	ENSDARG00000117520	26.8045	22.6987	26	0.0439634	-0.195903
lincRNA	CU179643.1	ENSDARG00000086489	4398.08	4396.56	4270	0.0426384	0.0421391
lincRNA	CABZ01061349.1	ENSDARG00000105487	1013.21	976.916	984	0.042203	-0.0104233
lincRNA	CR848749.1	ENSDARG00000117539	440.666	438.259	428	0.0420746	0.0341735
lincRNA	CABZ01015815.3	ENSDARG00000105694	48.2481	32.302	47	0.0378112	-0.541039
lincRNA	CABZ01067754.1	ENSDARG00000117522	94.3518	107.382	92	0.0364166	0.223049
lincRNA	CR354549.11	ENSDARG00000117711	47.1759	31.4289	46	0.0364166	-0.54954
lincRNA	CABZ01052570.1	ENSDARG00000117484	1053.95	924.535	1028	0.03597	-0.153041
lincRNA	BX321882.1	ENSDARG00000117350	69.6917	55.0007	68	0.0354519	-0.306086
lincRNA	BX901923.2	ENSDARG00000104200	3162.93	3308.77	3087	0.0350564	0.100089
lincRNA	CR388132.1	ENSDARG00000097728	114.723	106.509	112	0.034659	-0.0725207
lincRNA	BX957270.1	ENSDARG00000097326	868.466	1099.14	848	0.0344046	0.374239
lincRNA	AL929210.2	ENSDARG00000117295	67.5473	41.9053	66	0.0334328	-0.655335
lincRNA	AL954138.1	ENSDARG00000117322	112.579	110.874	110	0.0334328	0.0114219
lincRNA	BX294129.1	ENSDARG00000092014	470.687	405.957	460	0.033134	-0.180306
lincRNA	crhr2	ENSDARG00000092918	179.054	192.939	175	0.0330402	0.140788
lincRNA	CABZ01084961.1	ENSDARG00000117282	3115.75	3057.34	3046	0.0326657	0.00536007
lincRNA	CR812464.1	ENSDARG00000097976	550.028	845.962	538	0.0318996	0.652987
lincRNA	CABZ01065684.1	ENSDARG00000117431	680.834	665.246	666	0.0317814	-0.00163425
lincRNA	BX901907.4	ENSDARG00000096493	262.684	274.13	257	0.0315604	0.0930931
lincRNA	CABZ01087564.1	ENSDARG00000117588	65.403	67.223	64	0.0312843	0.0708835
lincRNA	AL954129.1	ENSDARG00000105524	42.8872	45.3974	42	0.0301576	0.112219
lincRNA	CU855685.1	ENSDARG00000097974	206.931	201.669	203	0.0276681	-0.00948995
lincRNA	CABZ01066727.1	ENSDARG00000117247	717.288	726.358	704	0.0269778	0.045105
lincRNA	BX322530.1	ENSDARG00000088741	6448.09	7344.77	6333	0.0259828	0.213828
lincRNA	CR533571.1	ENSDARG00000117783	140.456	149.287	138	0.0254455	0.113425
lincRNA	AL929171.1	ENSDARG00000095920	39.6707	55.0007	39	0.0245981	0.495975
lincRNA	FQ311924.2	ENSDARG00000117525	1056.1	1064.22	1039	0.0235469	0.0345994
lincRNA	CR925761.4	ENSDARG00000104698	214.436	252.305	211	0.023304	0.257923
lincRNA	FP236157.1	ENSDARG00000093583	19.2992	20.0796	19	0.0225445	0.0797314
lincRNA	CABZ01052756.1	ENSDARG00000117765	632.586	786.597	623	0.0220298	0.336392
lincRNA	CABZ01058045.1	ENSDARG00000117729	1834.5	1671.85	1807	0.0217902	-0.112155
lincRNA	FP236157.5	ENSDARG00000117258	351.675	285.48	347	0.0193071	-0.281548
lincRNA	CU660013.1	ENSDARG00000096688	73.9804	73.3342	73	0.0192469	0.00658979
lincRNA	BX005396.2	ENSDARG00000099831	1137.58	1053.74	1123	0.0186137	-0.0918353
lincRNA	CR377229.1	ENSDARG00000117622	1132.22	1168.98	1118	0.0182366	0.0643327
lincRNA	CABZ01018269.1	ENSDARG00000117653	145.816	398.973	144	0.0180848	1.47022
lincRNA	CT027759.1	ENSDARG00000117802	18.2271	27.9368	18	0.0180848	0.634172
lincRNA	BX897720.1	ENSDARG00000097393	109.362	66.35	108	0.0180848	-0.702863
lincRNA	CU633745.1	ENSDARG00000117291	951.024	1051.12	941	0.0152864	0.159666
lincRNA	BX927184.1	ENSDARG00000097904	491.058	487.149	486	0.0149383	0.00340573
lincRNA	CR848757.1	ENSDARG00000097182	1229.79	1135.81	1218	0.0138982	-0.100796
lincRNA	CABZ01051877.1	ENSDARG00000117767	51.4646	43.6513	51	0.0130841	-0.224472
lincRNA	CR391953.1	ENSDARG00000117687	101.857	90.7947	101	0.0121911	-0.153675
lincRNA	BX004768.1	ENSDARG00000100470	372.046	371.909	369	0.0118618	0.0113295
lincRNA	CABZ01015815.2	ENSDARG00000105672	2873.44	2876.62	2850	0.0118181	0.0134135
lincRNA	BX936447.1	ENSDARG00000117316	168.332	146.668	167	0.0114634	-0.18729
lincRNA	CU062632.1	ENSDARG00000117236	3614.32	3786.31	3588	0.0105437	0.0776145
lincRNA	BX279523.1	ENSDARG00000096810	99.7127	96.9059	99	0.0103492	-0.0308438
lincRNA	LO018383.1	ENSDARG00000117787	1344.51	1338.35	1335	0.0102446	0.00361488
lincRNA	CR382294.1	ENSDARG00000096461	2816.62	3428.37	2800	0.00853634	0.292098
lincRNA	CU138533.1	ENSDARG00000099842	3536.05	3448.45	3517	0.00779303	-0.0283958
lincRNA	FP016248.1	ENSDARG00000117621	3623.97	3890.2	3605	0.00757096	0.109847
lincRNA	CR848841.1	ENSDARG00000094396	64.3308	68.9691	64	0.00743757	0.107878
lincRNA	CU655829.1	ENSDARG00000097022	48.2481	37.5401	48	0.00743757	-0.354601
lincRNA	BX294100.2	ENSDARG00000097577	16.0827	13.9684	16	0.00743757	-0.195903
lincRNA	CR854945.1	ENSDARG00000101125	127.589	154.526	127	0.00668005	0.283018
lincRNA	BX511111.3	ENSDARG00000117326	317.365	324.766	316	0.00621959	0.039475
lincRNA	CR855337.1	ENSDARG00000094295	616.503	700.167	614	0.00587027	0.189461
lincRNA	FP085414.2	ENSDARG00000103734	2177.6	2165.11	2169	0.00570716	-0.00259301
lincRNA	BX511093.1	ENSDARG00000092109	31.0932	41.0322	31	0.00433165	0.404489
lincRNA	BX510915.1	ENSDARG00000099630	1271.61	1228.35	1268	0.00409623	-0.0458355
lincRNA	CR855123.1	ENSDARG00000117630	199.425	209.526	199	0.00308116	0.0743629
lincRNA	AL807792.1	ENSDARG00000096836	717.288	666.992	716	0.00259359	-0.10229
lincRNA	BX569790.1	ENSDARG00000092717	137.239	123.097	137	0.00251489	-0.154384
lincRNA	LO017643.1	ENSDARG00000117410	774.114	756.914	773	0.00207739	-0.0303395
lincRNA	CR847503.1	ENSDARG00000092715	181.198	158.891	181	0.00158052	-0.187954
lincRNA	CABZ01015815.4	ENSDARG00000105743	301.283	276.749	301	0.00135361	-0.121184
lincRNA	AL935334.1	ENSDARG00000117676	90.0631	90.7947	90	0.0010113	0.0126835
lincRNA	CR848667.1	ENSDARG00000097712	268.045	221.749	268	0.000242064	-0.273308
lincRNA	BX465834.1	ENSDARG00000095715	5969.9	5652.84	5971	-0.000266387	-0.0789955
lincRNA	CABZ01072532.1	ENSDARG00000117707	487.842	591.912	488	-0.000467632	0.278501
lincRNA	CU633978.1	ENSDARG00000097674	2004.98	2085.66	2007	-0.00145538	0.0554632
lincRNA	AL929058.1	ENSDARG00000092980	5910.93	6090.23	5921	-0.00245628	0.0406561
lincRNA	AL929105.1	ENSDARG00000105194	57.8977	55.0007	58	-0.00254652	-0.0766041
lincRNA	CU207269.1	ENSDARG00000117261	56.8255	37.5401	57	-0.00442259	-0.602528
lincRNA	CABZ01074708.1	ENSDARG00000117699	113.651	116.986	114	-0.00442259	0.0372961
lincRNA	FP236354.1	ENSDARG00000104362	298.066	287.226	299	-0.00451363	-0.057961
lincRNA	CT027586.1	ENSDARG00000101483	13.9383	6.98421	14	-0.00636823	-1.00326
lincRNA	CR589876.1	ENSDARG00000096997	10424.8	9912.34	10476	-0.00706757	-0.0797904
lincRNA	CU693471.1	ENSDARG00000104833	187.631	180.716	189	-0.0104843	-0.0646585
lincRNA	BX005443.1	ENSDARG00000117629	508.213	563.102	512	-0.0107098	0.137252
lincRNA	CR762400.1	ENSDARG00000097626	132.95	144.049	134	-0.0113459	0.10433
lincRNA	BX510919.1	ENSDARG00000096764	4740.11	4363.39	4778	-0.0114871	-0.130959
lincRNA	FQ377605.1	ENSDARG00000101927	259.468	222.622	262	-0.0140128	-0.234973
lincRNA	LO018168.1	ENSDARG00000117550	2031.78	1998.36	2052	-0.0142859	-0.0382163
lincRNA	CU896647.1	ENSDARG00000117489	64.3308	48.8895	65	-0.0149302	-0.410916
lincRNA	BX465227.1	ENSDARG00000097825	690.484	639.928	698	-0.0156194	-0.125317
lincRNA	CABZ01024844.1	ENSDARG00000117513	76.1248	72.4612	77	-0.0164925	-0.0876502
lincRNA	CABZ01100278.1	ENSDARG00000117373	240.168	270.638	243	-0.0169106	0.155409
lincRNA	CABZ01090219.1	ENSDARG00000117662	365.613	384.132	370	-0.0172066	0.0540752
lincRNA	CR749763.5	ENSDARG00000097754	50.3925	41.9053	51	-0.0172895	-0.283366
lincRNA	CT009487.2	ENSDARG00000105183	87.9188	77.6993	89	-0.0176345	-0.195903
lincRNA	oip5-as1	ENSDARG00000093456	15948.7	16268	16153	-0.0183655	0.0102322
lincRNA	BX005275.2	ENSDARG00000096455	62.1864	74.2072	63	-0.018752	0.236208
lincRNA	FP236822.1	ENSDARG00000117507	836.3	875.645	848	-0.0200432	0.0462824
lincRNA	CR385024.1	ENSDARG00000117610	36.4541	45.3974	37	-0.0214436	0.295083
lincRNA	BX908799.1	ENSDARG00000100463	58.9699	60.2388	60	-0.0249839	0.00573079
lincRNA	BX569801.2	ENSDARG00000096790	23.588	34.921	24	-0.0249839	0.541063
lincRNA	BX088525.2	ENSDARG00000117222	11.794	6.98421	12	-0.0249839	-0.780866
lincRNA	CABZ01053592.1	ENSDARG00000117388	528.585	685.326	538	-0.0254716	0.349183
lincRNA	BX119963.1	ENSDARG00000096135	127.589	138.811	130	-0.0270031	0.0946121
lincRNA	CR385053.2	ENSDARG00000097778	3641.12	3555.84	3710	-0.0270358	-0.0612304
lincRNA	CT573204.1	ENSDARG00000093518	313.077	326.512	319	-0.0270411	0.0335788
lincRNA	zgc:194629	ENSDARG00000117308	230.519	275.003	235	-0.0277771	0.226788
lincRNA	BX293559.2	ENSDARG00000117441	80.4135	83.8105	82	-0.0281863	0.0315074
lincRNA	BX649411.1	ENSDARG00000101254	68.6195	85.5566	70	-0.028736	0.289524
lincRNA	CABZ01057381.1	ENSDARG00000117479	56.8255	55.0007	58	-0.0295136	-0.0766041
lincRNA	BX005389.2	ENSDARG00000117368	124.373	144.049	127	-0.0301567	0.181734
lincRNA	CR847936.10	ENSDARG00000117482	539.306	520.324	551	-0.0309469	-0.0826431
lincRNA	CT573787.2	ENSDARG00000117582	55.7534	55.0007	57	-0.0319033	-0.0515132
lincRNA	AL928707.3	ENSDARG00000117700	88.9909	80.3184	91	-0.0322082	-0.180136
lincRNA	CABZ01048956.1	ENSDARG00000117474	1347.73	1466.68	1379	-0.0330908	0.0889357
lincRNA	CU659670.1	ENSDARG00000096419	907.064	863.423	929	-0.034474	-0.105611
lincRNA	CU694197.1	ENSDARG00000098378	1154.74	1265.02	1184	-0.0361039	0.0954854
lincRNA	FO904966.2	ENSDARG00000117403	1464.6	1534.78	1502	-0.0363804	0.0311472
lincRNA	CR847898.3	ENSDARG00000097574	10.7218	8.73026	11	-0.0369566	-0.333407
lincRNA	AL627126.1	ENSDARG00000117804	42.8872	42.7783	44	-0.0369566	-0.0406248
lincRNA	CU469539.1	ENSDARG00000091870	417.078	453.974	428	-0.0372937	0.0849978
lincRNA	CR383676.1	ENSDARG00000099970	576172	595434	591316	-0.037429	0.0100113
lincRNA	CR848683.2	ENSDARG00000117442	10630.7	11339.7	10911	-0.0375517	0.055604
lincRNA	BX936337.1	ENSDARG00000092870	1859.16	1851.69	1909	-0.0381662	-0.0439756
lincRNA	BX927219.1	ENSDARG00000117432	137.239	135.319	141	-0.0390044	-0.05933
lincRNA	FP103074.1	ENSDARG00000117422	83.63	85.5566	86	-0.0403156	-0.00745798
lincRNA	CABZ01079837.1	ENSDARG00000117688	72.9082	72.4612	75	-0.0408089	-0.0496823
lincRNA	LO018250.1	ENSDARG00000117641	675.473	606.753	695	-0.0411142	-0.195903
lincRNA	CABZ01073166.1	ENSDARG00000117434	1494.62	1591.53	1538	-0.041278	0.049356
lincRNA	CU693484.1	ENSDARG00000093463	31.0932	34.921	32	-0.041472	0.126025
lincRNA	BX640462.3	ENSDARG00000117487	422.439	437.386	435	-0.0422728	0.00789213
lincRNA	CU914157.1	ENSDARG00000096825	51.4646	63.7309	53	-0.042411	0.266001
lincRNA	FP102122.3	ENSDARG00000117695	51.4646	42.7783	53	-0.042411	-0.309114
lincRNA	BX284620.1	ENSDARG00000117470	295.922	247.939	305	-0.043594	-0.298821
lincRNA	CU660013.4	ENSDARG00000096803	1067.89	1059.85	1101	-0.0440499	-0.0549491
lincRNA	CABZ01079872.1	ENSDARG00000117249	424.583	441.751	438	-0.0448835	0.0123034
lincRNA	BX294444.1	ENSDARG00000117492	130.806	110.001	135	-0.0455313	-0.295439
lincRNA	BX000522.1	ENSDARG00000117580	420.295	502.863	434	-0.0462944	0.212471
lincRNA	BX088594.1	ENSDARG00000096589	345.242	333.496	357	-0.0483164	-0.0982545
lincRNA	FO905052.1	ENSDARG00000117273	273.406	254.924	283	-0.0497578	-0.150737
lincRNA	CU570782.1	ENSDARG00000098462	185.487	187.701	192	-0.0497873	-0.0326727
lincRNA	CR626866.1	ENSDARG00000098238	145.816	165.875	151	-0.0503949	0.135548
lincRNA	CR926130.1	ENSDARG00000117735	5984.91	8622.01	6202	-0.0514044	0.47529
lincRNA	AL928870.1	ENSDARG00000097413	9.64962	9.60329	10	-0.0514561	-0.0583996
lincRNA	BX649397.1	ENSDARG00000097769	38.5985	44.5243	40	-0.0514561	0.154594
lincRNA	BX649522.2	ENSDARG00000117708	38.5985	49.7625	40	-0.0514561	0.315059
lincRNA	CR788254.3	ENSDARG00000117752	9.64962	9.60329	10	-0.0514561	-0.0583996
lincRNA	CABZ01102518.1	ENSDARG00000117772	152.25	169.367	158	-0.0534867	0.100229
lincRNA	CR559941.1	ENSDARG00000117720	113.651	92.5408	118	-0.0541756	-0.350626
lincRNA	BX470189.2	ENSDARG00000091977	331.304	353.576	344	-0.0542548	0.0396103
lincRNA	BX324003.1	ENSDARG00000096499	159.755	171.113	166	-0.0553239	0.0437673
lincRNA	FQ312017.1	ENSDARG00000117739	187.631	169.367	195	-0.0555722	-0.203321
lincRNA	BX005154.1	ENSDARG00000117353	1554.66	1497.24	1616	-0.0558273	-0.110122
lincRNA	FP016142.6	ENSDARG00000102454	140.456	170.24	146	-0.0558546	0.221603
lincRNA	FP236644.1	ENSDARG00000117810	242.313	206.907	252	-0.056554	-0.28444
lincRNA	BX276098.1	ENSDARG00000117290	120.084	109.128	125	-0.0578824	-0.195903
lincRNA	BX510989.2	ENSDARG00000096287	338.809	284.607	353	-0.0591967	-0.310699
lincRNA	CABZ01068366.1	ENSDARG00000117808	244.457	241.828	255	-0.0609165	-0.0765143
lincRNA	FP102158.1	ENSDARG00000117607	63.2586	61.1118	66	-0.0612041	-0.111014
lincRNA	CABZ01026153.1	ENSDARG00000117297	1535.36	1526.92	1602	-0.0612957	-0.0692469
lincRNA	BX005005.2	ENSDARG00000117566	448.171	428.656	468	-0.0624586	-0.126689
lincRNA	AL935322.1	ENSDARG00000117301	26.8045	30.5559	28	-0.0629518	0.126025
lincRNA	FP236542.2	ENSDARG00000117289	318.437	335.242	333	-0.0645123	0.00968106
lincRNA	BX248106.1	ENSDARG00000117332	79.3413	82.9375	83	-0.0650391	-0.0010869
lincRNA	BX927317.2	ENSDARG00000101263	236.952	263.654	248	-0.0657468	0.0883054
lincRNA	CR854988.1	ENSDARG00000117792	2451	2200.9	2568	-0.0672728	-0.222552
lincRNA	AL954696.2	ENSDARG00000117348	334.52	329.131	351	-0.069378	-0.0928096
lincRNA	CR854989.1	ENSDARG00000097514	273.406	262.781	287	-0.0700065	-0.12719
lincRNA	CABZ01078989.1	ENSDARG00000117378	143.672	174.605	151	-0.0717686	0.209548
lincRNA	CU468917.1	ENSDARG00000101565	184.415	185.955	194	-0.0731011	-0.0611063
lincRNA	CABZ01024499.1	ENSDARG00000117633	316.293	328.258	333	-0.0742603	-0.0206926
lincRNA	BX537310.1	ENSDARG00000117275	6101.78	6205.47	6428	-0.0751408	-0.0508293
lincRNA	BX323578.1	ENSDARG00000117556	452.46	522.07	477	-0.0761993	0.130253
lincRNA	BX649620.1	ENSDARG00000099699	24.6601	76.8263	26	-0.0763308	1.56309
lincRNA	FO681472.1	ENSDARG00000117328	98.6405	128.335	104	-0.0763308	0.30333
lincRNA	CT956055.1	ENSDARG00000117728	262.684	248.812	277	-0.0765573	-0.154827
lincRNA	CR383662.1	ENSDARG00000093014	245.529	330.877	259	-0.0770575	0.353343
lincRNA	AL590150.2	ENSDARG00000092341	40.7428	47.1434	43	-0.0777903	0.13272
lincRNA	BX005389.4	ENSDARG00000117716	40.7428	22.6987	43	-0.0777903	-0.921728
lincRNA	CR391921.1	ENSDARG00000094637	56.8255	47.1434	60	-0.0784232	-0.347906
lincRNA	CR382370.2	ENSDARG00000096632	1618.99	1649.15	1710	-0.0789008	-0.0522767
lincRNA	CR450727.1	ENSDARG00000097549	209.075	215.637	221	-0.0800253	-0.0354384
lincRNA	CABZ01000591.1	ENSDARG00000117279	64.3308	84.6835	68	-0.0800253	0.316547
lincRNA	BX957306.1	ENSDARG00000117532	128.662	125.716	136	-0.0800253	-0.113441
lincRNA	CR376766.2	ENSDARG00000100443	1302.7	1423.91	1378	-0.0810726	0.0472778
lincRNA	CR855307.1	ENSDARG00000099628	655.102	722.866	693	-0.081136	0.0608723
lincRNA	CABZ01056826.1	ENSDARG00000117352	342.025	423.418	362	-0.0818863	0.226092
lincRNA	CABZ01009248.1	ENSDARG00000117788	95.424	97.7789	101	-0.0819311	-0.0467596
lincRNA	CR677513.1	ENSDARG00000093890	86.8466	106.509	92	-0.083165	0.211272
lincRNA	BX901907.3	ENSDARG00000096486	779.475	875.645	826	-0.0836394	0.0842048
lincRNA	CU856520.1	ENSDARG00000098941	1671.53	1673.59	1773	-0.0850246	-0.0832453
lincRNA	CU915770.2	ENSDARG00000117672	378.479	419.053	402	-0.0869803	0.0599358
lincRNA	FP101883.1	ENSDARG00000117421	308.788	412.941	328	-0.08708	0.332241
lincRNA	BX571827.2	ENSDARG00000117405	4237.25	4194.89	4508	-0.0893576	-0.103854
lincRNA	CR383662.3	ENSDARG00000095446	334.52	435.64	356	-0.0897842	0.29126
lincRNA	CR847968.1	ENSDARG00000096991	5359.83	5363.87	5704	-0.0897875	-0.0886988
lincRNA	CABZ01085594.1	ENSDARG00000117283	340.953	345.718	363	-0.0903958	-0.0703722
lincRNA	CR450813.1	ENSDARG00000097035	22.5158	34.048	24	-0.0920981	0.504537
lincRNA	FP236157.2	ENSDARG00000102872	15.0105	14.8414	16	-0.0920981	-0.10844
lincRNA	AL953875.1	ENSDARG00000117502	246.601	281.114	263	-0.092882	0.0960948
lincRNA	LO018644.1	ENSDARG00000117267	429.944	455.72	459	-0.0943449	-0.0103474
lincRNA	CT955962.3	ENSDARG00000117501	358.108	367.544	383	-0.0969493	-0.0594272
lincRNA	FP236157.8	ENSDARG00000117636	1123.64	1053.74	1202	-0.0972512	-0.189914
lincRNA	CR394555.1	ENSDARG00000105659	36.4541	28.8099	39	-0.0973924	-0.436911
lincRNA	nadsyn1	ENSDARG00000117533	165.116	194.685	177	-0.100272	0.137391
lincRNA	BX897747.1	ENSDARG00000117746	444.955	510.72	477	-0.100331	0.0985443
lincRNA	CT583687.2	ENSDARG00000097851	21.4436	20.0796	23	-0.101087	-0.195903
lincRNA	LO018400.1	ENSDARG00000117777	1463.53	1569.7	1572	-0.103153	-0.00211127
lincRNA	BX890558.1	ENSDARG00000097000	140.456	139.684	151	-0.104435	-0.11238
lincRNA	BX511089.4	ENSDARG00000117296	1199.77	1369.78	1290	-0.104614	0.0865712
lincRNA	CT574585.1	ENSDARG00000095852	411.717	455.72	443	-0.105653	0.04084
lincRNA	BX321870.1	ENSDARG00000098519	13.9383	13.0954	15	-0.105904	-0.195903
lincRNA	CR352338.1	ENSDARG00000101568	522.152	527.308	562	-0.106101	-0.0919247
lincRNA	BX088713.1	ENSDARG00000095066	243.385	314.289	262	-0.106328	0.262527
lincRNA	CT997819.3	ENSDARG00000117411	159.755	194.685	172	-0.106549	0.178732
lincRNA	CU062501.1	ENSDARG00000098908	130.806	134.446	141	-0.108267	-0.0686679
lincRNA	CABZ01080006.1	ENSDARG00000117768	75.0526	65.477	81	-0.11002	-0.306934
lincRNA	CABZ01085061.1	ENSDARG00000117822	849.166	942.868	917	-0.110874	0.0401346
lincRNA	CR318601.1	ENSDARG00000105526	128.662	125.716	139	-0.111504	-0.144919
lincRNA	BX255963.1	ENSDARG00000096734	114.723	116.112	124	-0.112182	-0.0948169
lincRNA	CR759955.1	ENSDARG00000117689	47.1759	67.223	51	-0.112447	0.398458
lincRNA	BX957346.1	ENSDARG00000096850	3020.33	3224.09	3267	-0.11326	-0.0190763
lincRNA	CR926463.1	ENSDARG00000096973	26.8045	26.1908	29	-0.113578	-0.146993
lincRNA	BX510306.1	ENSDARG00000117727	634.73	680.96	687	-0.114166	-0.012739
lincRNA	CR385041.1	ENSDARG00000117826	66.4752	68.096	72	-0.115182	-0.0804259
lincRNA	CR769778.2	ENSDARG00000117536	212.292	207.78	230	-0.115586	-0.146575
lincRNA	BX255897.1	ENSDARG00000096732	72.9082	82.9375	79	-0.115771	0.0701718
lincRNA	BX571707.1	ENSDARG00000117603	1131.15	1220.49	1226	-0.116169	-0.00649769
lincRNA	CR759863.2	ENSDARG00000096969	39.6707	52.3816	43	-0.116264	0.284723
lincRNA	LO017954.1	ENSDARG00000117380	164.044	165.875	178	-0.117799	-0.101781
lincRNA	BX957325.1	ENSDARG00000105634	1826.99	2224.47	1984	-0.11894	0.16505
lincRNA	BX547939.1	ENSDARG00000117526	306.643	335.242	333	-0.11896	0.00968106
lincRNA	AL805905.1	ENSDARG00000117732	136.167	151.907	148	-0.120222	0.0375871
lincRNA	CU394253.1	ENSDARG00000102989	12.8662	8.73026	14	-0.121845	-0.68133
lincRNA	CU550719.2	ENSDARG00000104707	25.7323	16.5875	28	-0.121845	-0.75533
lincRNA	FP074874.4	ENSDARG00000105810	12.8662	4.36513	14	-0.121845	-1.68133
lincRNA	CABZ01086127.1	ENSDARG00000117547	2519.62	2626.94	2745	-0.123598	-0.0634251
lincRNA	CR381664.2	ENSDARG00000096193	152.25	183.336	166	-0.124745	0.143303
lincRNA	BX548032.3	ENSDARG00000096092	374.191	360.56	408	-0.124795	-0.17833
lincRNA	BX004970.1	ENSDARG00000117726	957.457	908.82	1044	-0.124843	-0.200055
lincRNA	BX640547.1	ENSDARG00000092775	145.816	133.573	159	-0.124873	-0.251398
lincRNA	CR678070.1	ENSDARG00000117366	63.2586	48.0164	69	-0.125334	-0.523068
lincRNA	AL954832.1	ENSDARG00000117648	63.2586	67.223	69	-0.125334	-0.037641
lincRNA	CR855860.1	ENSDARG00000100012	284.128	305.559	310	-0.125729	-0.0208164
lincRNA	BX005003.1	ENSDARG00000098435	7415.2	8155.81	8091	-0.125833	0.0115103
lincRNA	CU655820.1	ENSDARG00000097365	1308.06	1350.57	1429	-0.127578	-0.0814358
lincRNA	CR550304.1	ENSDARG00000117614	531.801	519.451	581	-0.127651	-0.161552
lincRNA	CU207301.3	ENSDARG00000097721	1056.1	1095.65	1154	-0.127901	-0.0748589
lincRNA	BX004803.1	ENSDARG00000096799	155.466	168.494	170	-0.128935	-0.012837
lincRNA	CR847898.1	ENSDARG00000096822	31.0932	29.6829	34	-0.128935	-0.195903
lincRNA	AL954191.1	ENSDARG00000117407	483.553	701.04	529	-0.129593	0.406229
lincRNA	AL845324.1	ENSDARG00000023609	2453.15	2676.7	2684	-0.129751	-0.00393005
lincRNA	AL845306.1	ENSDARG00000095211	24.6601	27.0638	27	-0.130779	0.00340573
lincRNA	CABZ01088109.1	ENSDARG00000100056	6464.17	6498.81	7082	-0.131691	-0.123982
lincRNA	BX530032.1	ENSDARG00000101617	220.869	192.066	242	-0.131816	-0.333407
lincRNA	BX470211.1	ENSDARG00000105629	42.8872	28.8099	47	-0.132114	-0.706098
lincRNA	BX649276.1	ENSDARG00000117360	158.683	189.447	174	-0.132943	0.122705
lincRNA	CR383676.2	ENSDARG00000105368	99747	111680	109418	-0.133504	0.0295225
lincRNA	CABZ01044154.1	ENSDARG00000117537	197.281	199.923	217	-0.137442	-0.118251
lincRNA	CU138542.2	ENSDARG00000104523	149.033	157.145	164	-0.138064	-0.061602
lincRNA	AL935295.2	ENSDARG00000117663	65.403	61.1118	72	-0.138641	-0.236545
lincRNA	BX666064.1	ENSDARG00000095798	11.794	13.0954	13	-0.140461	0.0105478
lincRNA	CR392001.2	ENSDARG00000096119	11.794	11.3493	13	-0.140461	-0.195903
lincRNA	BX572078.1	ENSDARG00000099083	23.588	25.3178	26	-0.140461	-0.0383618
lincRNA	CR354444.2	ENSDARG00000103549	11.794	32.302	13	-0.140461	1.31311
lincRNA	CR394546.5	ENSDARG00000117725	11.794	15.7145	13	-0.140461	0.273582
lincRNA	FQ377662.1	ENSDARG00000117391	406.356	422.545	448	-0.140754	-0.0843948
lincRNA	CU856423.1	ENSDARG00000099569	932.796	1133.19	1029	-0.141609	0.139144
lincRNA	CABZ01078600.1	ENSDARG00000117569	145.816	141.43	161	-0.142907	-0.18697
lincRNA	BX322792.2	ENSDARG00000117704	238.024	247.939	263	-0.143956	-0.0850749
lincRNA	BX927363.1	ENSDARG00000117796	236.952	227.86	262	-0.144973	-0.20142
lincRNA	CR407561.1	ENSDARG00000094865	75.0526	74.2072	83	-0.145209	-0.161552
lincRNA	BX957228.1	ENSDARG00000097983	218.725	236.59	242	-0.145891	-0.0326173
lincRNA	CABZ01066320.1	ENSDARG00000117545	51.4646	34.921	57	-0.147381	-0.706865
lincRNA	AL929493.2	ENSDARG00000117535	165.116	194.685	183	-0.148366	0.089297
lincRNA	LO018166.1	ENSDARG00000117602	261.612	299.448	290	-0.148625	0.0462526
lincRNA	CR385026.1	ENSDARG00000096868	22.5158	32.302	25	-0.150992	0.369694
lincRNA	BX005389.3	ENSDARG00000117558	112.579	130.081	125	-0.150992	0.0574812
lincRNA	CR855389.1	ENSDARG00000099764	95.424	118.732	106	-0.15164	0.163639
lincRNA	CU856516.1	ENSDARG00000099189	502.852	522.07	559	-0.152713	-0.0986059
lincRNA	LO018196.1	ENSDARG00000117324	865.249	969.932	962	-0.152921	0.0118469
lincRNA	CU464118.1	ENSDARG00000097747	4689.71	5122.04	5217	-0.15372	-0.0265005
lincRNA	BX001026.1	ENSDARG00000095883	61.1143	54.1276	68	-0.154026	-0.32917
lincRNA	CU571382.1	ENSDARG00000069839	33.2376	34.048	37	-0.15471	-0.119954
lincRNA	CR388417.1	ENSDARG00000117496	138.311	147.541	154	-0.155012	-0.0618102
lincRNA	CR394528.1	ENSDARG00000111249	1196.55	1357.56	1333	-0.155793	0.0263347
lincRNA	CABZ01117607.1	ENSDARG00000117358	1038.94	1402.08	1158	-0.15652	0.275934
lincRNA	CABZ01067979.1	ENSDARG00000117444	333.448	333.496	372	-0.157841	-0.157633
lincRNA	CABZ01031868.1	ENSDARG00000117385	518.935	512.466	579	-0.158009	-0.176106
lincRNA	BX957297.2	ENSDARG00000105608	97.5684	109.128	109	-0.159843	0.00169689
lincRNA	CU459186.8	ENSDARG00000105439	298.066	329.131	333	-0.15989	-0.0168607
lincRNA	CABZ01074913.1	ENSDARG00000117376	498.564	531.673	557	-0.1599	-0.0671382
lincRNA	AL928650.3	ENSDARG00000096599	75.0526	115.239	84	-0.162487	0.456174
lincRNA	CU570782.2	ENSDARG00000103668	16.0827	16.5875	18	-0.162487	-0.117901
lincRNA	CT025771.1	ENSDARG00000117721	32.1654	37.5401	36	-0.162487	0.0604367
lincRNA	CU627988.1	ENSDARG00000117284	276.622	271.511	310	-0.16435	-0.191257
lincRNA	CR936968.2	ENSDARG00000096420	180.126	199.923	202	-0.165347	-0.0149108
lincRNA	FP102122.2	ENSDARG00000117471	73.9804	74.2072	83	-0.165968	-0.161552
lincRNA	CT027551.1	ENSDARG00000097357	137.239	165.875	154	-0.16624	0.107166
lincRNA	CR589875.1	ENSDARG00000096934	452.46	446.989	508	-0.167039	-0.184588
lincRNA	CR812832.1	ENSDARG00000103278	256.251	273.257	288	-0.168511	-0.0758092
lincRNA	CT573279.1	ENSDARG00000117214	287.344	297.702	323	-0.168754	-0.117665
lincRNA	BX119992.1	ENSDARG00000096775	280.911	339.607	316	-0.169811	0.103943
lincRNA	BX005065.1	ENSDARG00000092243	202.642	264.527	228	-0.170101	0.214381
lincRNA	CR383662.8	ENSDARG00000116855	197.281	225.241	222	-0.170307	0.0209083
lincRNA	CABZ01033540.1	ENSDARG00000117469	25.7323	31.4289	29	-0.172472	0.116041
lincRNA	CR788226.1	ENSDARG00000101399	66.4752	122.224	75	-0.174075	0.704561
lincRNA	CU019562.1	ENSDARG00000100601	20.3714	31.4289	23	-0.175087	0.45046
lincRNA	FO681390.1	ENSDARG00000105480	40.7428	43.6513	46	-0.175087	-0.0756088
lincRNA	CU463284.1	ENSDARG00000117478	70.7639	66.35	80	-0.176987	-0.269904
lincRNA	CABZ01057496.1	ENSDARG00000117443	721.577	839.851	816	-0.177416	0.0415647
lincRNA	BX324134.1	ENSDARG00000097859	50.3925	58.4928	57	-0.177754	0.0372961
lincRNA	BX511021.4	ENSDARG00000117436	196.209	236.59	222	-0.178169	0.0918301
lincRNA	CR559944.1	ENSDARG00000117415	75.0526	87.3026	85	-0.179561	0.0385622
lincRNA	BX323593.1	ENSDARG00000117821	1290.9	1604.62	1462	-0.179561	0.13429
lincRNA	CABZ01045414.1	ENSDARG00000117548	269.117	263.654	305	-0.180575	-0.210164
lincRNA	BX000460.1	ENSDARG00000117649	88.9909	73.3342	101	-0.182625	-0.461797
lincRNA	CU972516.1	ENSDARG00000101511	24.6601	15.7145	28	-0.183246	-0.833333
lincRNA	BX682557.1	ENSDARG00000098491	182.271	226.114	207	-0.183549	0.127418
lincRNA	CABZ01089980.1	ENSDARG00000117446	34.3098	21.8257	39	-0.184855	-0.837449
lincRNA	LO018605.3	ENSDARG00000117512	92.2075	97.7789	105	-0.187434	-0.102794
lincRNA	BX510934.2	ENSDARG00000104884	19.2992	33.175	22	-0.18896	0.592593
lincRNA	CR450780.3	ENSDARG00000117644	192.992	190.32	220	-0.18896	-0.209078
lincRNA	FO834866.1	ENSDARG00000117657	164.044	192.066	187	-0.18896	0.0385622
lincRNA	CR391940.1	ENSDARG00000091946	2462.8	2619.08	2809	-0.189759	-0.100997
lincRNA	BX322574.1	ENSDARG00000098353	1403.48	1582.8	1601	-0.189961	-0.0164975
lincRNA	CT737162.1	ENSDARG00000096998	687.267	735.088	784	-0.189982	-0.0929365
lincRNA	FO744838.1	ENSDARG00000117775	99.7127	104.763	114	-0.193184	-0.121902
lincRNA	CR556696.1	ENSDARG00000096558	685.123	699.294	784	-0.194491	-0.164954
lincRNA	CABZ01047589.1	ENSDARG00000117374	453.532	483.657	519	-0.19453	-0.101752
lincRNA	CU683879.2	ENSDARG00000097781	528.585	550.88	605	-0.194801	-0.135198
lincRNA	BX548045.1	ENSDARG00000097410	165.116	123.097	189	-0.194909	-0.618594
lincRNA	BX324126.1	ENSDARG00000097811	23.588	30.5559	27	-0.194909	0.178492
lincRNA	CU633486.1	ENSDARG00000098008	23.588	29.6829	27	-0.194909	0.136672
lincRNA	BX005254.2	ENSDARG00000094560	474.976	569.213	544	-0.195753	0.0653622
lincRNA	CR925728.1	ENSDARG00000096898	75.0526	93.4138	86	-0.196435	0.119299
lincRNA	FP102921.2	ENSDARG00000097570	37.5263	37.5401	43	-0.196435	-0.195903
lincRNA	CR926469.1	ENSDARG00000095303	51.4646	63.7309	59	-0.197134	0.111278
lincRNA	BX890559.2	ENSDARG00000096504	13.9383	20.0796	16	-0.199013	0.327659
lincRNA	CR788237.1	ENSDARG00000098657	41.815	71.5882	48	-0.199013	0.576686
lincRNA	CABZ01071326.1	ENSDARG00000117311	13.9383	26.1908	16	-0.199013	0.710988
lincRNA	LO018324.1	ENSDARG00000117744	60.0421	70.7151	69	-0.200623	0.0354225
lincRNA	CR936371.1	ENSDARG00000094195	46.1037	69.8421	53	-0.201109	0.398105
lincRNA	CT027980.1	ENSDARG00000104999	86.8466	90.7947	100	-0.203459	-0.13932
lincRNA	AL929237.1	ENSDARG00000094104	36.4541	56.7467	42	-0.204308	0.434147
lincRNA	BX323087.2	ENSDARG00000117463	95.424	105.636	110	-0.205079	-0.0583996
lincRNA	AL590151.1	ENSDARG00000053570	672.257	683.58	775	-0.205184	-0.181087
lincRNA	CR376741.4	ENSDARG00000117347	58.9699	110.001	68	-0.205556	0.693914
lincRNA	CABZ01087560.1	ENSDARG00000117652	535.018	550.88	617	-0.205684	-0.163534
lincRNA	CR628324.1	ENSDARG00000117528	108.29	103.017	125	-0.207026	-0.279044
lincRNA	BX957317.3	ENSDARG00000117259	887.765	1002.23	1025	-0.207374	-0.0324043
lincRNA	BX323991.1	ENSDARG00000117665	45.0316	76.8263	52	-0.207575	0.563089
lincRNA	LO017938.1	ENSDARG00000117288	5135.74	5751.5	5938	-0.209404	-0.0460396
lincRNA	CABZ01067980.1	ENSDARG00000117320	659.391	667.865	763	-0.21055	-0.192126
lincRNA	CR388157.1	ENSDARG00000096693	458.893	614.61	531	-0.210554	0.21096
lincRNA	AL808129.1	ENSDARG00000097262	755.887	862.55	875	-0.211113	-0.020675
lincRNA	BX936406.1	ENSDARG00000095787	31.0932	34.048	36	-0.211397	-0.0804259
lincRNA	LO017858.1	ENSDARG00000117673	441.738	530.8	512	-0.212953	0.0520244
lincRNA	BX908756.2	ENSDARG00000117359	185.487	170.24	215	-0.213018	-0.336766
lincRNA	LO018315.8	ENSDARG00000117514	189.776	170.24	220	-0.213207	-0.369932
lincRNA	BX322665.2	ENSDARG00000095707	273.406	288.972	317	-0.213439	-0.133555
lincRNA	CABZ01050280.1	ENSDARG00000117758	554.317	589.293	643	-0.214107	-0.125834
lincRNA	CR381646.1	ENSDARG00000086925	43.9594	39.2862	51	-0.214326	-0.376475
lincRNA	CR792426.1	ENSDARG00000096347	92.2075	125.716	107	-0.214655	0.232555
lincRNA	BX510960.1	ENSDARG00000101133	619.72	735.088	720	-0.21638	0.0299203
lincRNA	CU571069.1	ENSDARG00000100041	436.377	569.213	507	-0.21641	0.166983
lincRNA	BX470107.1	ENSDARG00000117212	126.517	119.605	147	-0.216482	-0.297543
lincRNA	CU633762.1	ENSDARG00000100233	1702.62	1766.13	1979	-0.217014	-0.164178
lincRNA	LO017847.1	ENSDARG00000117800	431.016	555.245	501	-0.217068	0.148313
lincRNA	CR382372.1	ENSDARG00000096684	304.499	390.243	354	-0.217311	0.140622
lincRNA	CU695223.1	ENSDARG00000102240	266.973	217.384	311	-0.220222	-0.516672
lincRNA	CABZ01044764.2	ENSDARG00000105354	38.5985	59.3658	45	-0.221381	0.399707
lincRNA	AL772298.3	ENSDARG00000117343	8.57744	5.23816	10	-0.221381	-0.932869
lincRNA	CU302321.1	ENSDARG00000117510	12.8662	19.2066	15	-0.221381	0.356638
lincRNA	FP016142.5	ENSDARG00000101845	173.693	210.399	203	-0.224939	0.0516503
lincRNA	BX323074.2	ENSDARG00000095432	2152.94	2310.9	2517	-0.225399	-0.12325
lincRNA	BX537168.1	ENSDARG00000117573	122.229	136.192	143	-0.226434	-0.0703722
lincRNA	AL929222.1	ENSDARG00000096994	280.911	266.273	329	-0.227974	-0.305181
lincRNA	CU459174.1	ENSDARG00000097146	2585.03	2767.49	3030	-0.229139	-0.130738
lincRNA	CR848833.1	ENSDARG00000117428	2221.56	2928.13	2610	-0.232479	0.16593
lincRNA	CU929312.1	ENSDARG00000097608	98.6405	130.954	116	-0.233872	0.174935
lincRNA	CU695207.2	ENSDARG00000105469	36.4541	30.5559	43	-0.238255	-0.492885
lincRNA	FO704819.1	ENSDARG00000117233	149.033	198.177	176	-0.239944	0.171214
lincRNA	BX649516.2	ENSDARG00000096074	80.4135	90.7947	95	-0.24049	-0.065319
lincRNA	BX005355.1	ENSDARG00000091887	16.0827	18.3336	19	-0.24049	-0.0515132
lincRNA	FP325124.1	ENSDARG00000105356	16.0827	9.60329	19	-0.24049	-0.984399
lincRNA	CABZ01044765.1	ENSDARG00000105501	43.9594	35.7941	52	-0.242341	-0.538791
lincRNA	CU467961.1	ENSDARG00000078270	9073.86	9767.42	10746	-0.244012	-0.137751
lincRNA	CR848705.2	ENSDARG00000104692	2689.03	2856.54	3185	-0.244209	-0.157024
lincRNA	BX537130.1	ENSDARG00000101211	396.707	364.925	470	-0.244589	-0.365061
lincRNA	CR396595.1	ENSDARG00000117325	491.058	568.34	582	-0.245125	-0.0342647
lincRNA	CABZ01084382.1	ENSDARG00000117606	290.561	374.528	345	-0.247757	0.118478
lincRNA	CT583650.1	ENSDARG00000096869	262.684	333.496	312	-0.248217	0.0961235
lincRNA	BX296552.2	ENSDARG00000117220	85.7744	89.9217	102	-0.24995	-0.181828
lincRNA	BX511021.3	ENSDARG00000117414	31.0932	34.921	37	-0.250925	-0.0834283
lincRNA	BX569779.1	ENSDARG00000105331	19.2992	25.3178	23	-0.25309	0.138516
lincRNA	BX539321.2	ENSDARG00000117761	685.123	744.691	818	-0.255738	-0.135458
lincRNA	BX323067.1	ENSDARG00000097984	5823.01	6889.05	6964	-0.258151	-0.0156111
lincRNA	FO704797.1	ENSDARG00000117244	2032.85	2158.12	2433	-0.25923	-0.172961
lincRNA	FQ323163.1	ENSDARG00000117770	185.487	218.257	222	-0.259241	-0.0245347
lincRNA	FP243382.1	ENSDARG00000097649	139.383	174.605	167	-0.26079	0.0642488
lincRNA	CR555295.1	ENSDARG00000104802	139.383	175.478	167	-0.26079	0.0714443
lincRNA	CR847898.2	ENSDARG00000097265	135.095	122.224	162	-0.262023	-0.40647
lincRNA	FO834831.1	ENSDARG00000105456	15.0105	15.7145	18	-0.262023	-0.195903
lincRNA	CR847947.1	ENSDARG00000099001	320.582	330.004	385	-0.264166	-0.222375
lincRNA	BX957333.1	ENSDARG00000096066	40.7428	40.1592	49	-0.266235	-0.287051
lincRNA	CT583726.2	ENSDARG00000117395	746.237	793.581	898	-0.267081	-0.178338
lincRNA	CU062454.1	ENSDARG00000105327	33.2376	32.302	40	-0.267185	-0.308378
lincRNA	BX294177.1	ENSDARG00000096779	258.395	349.21	311	-0.267334	0.167182
lincRNA	LO018608.1	ENSDARG00000117335	239.096	338.734	288	-0.268478	0.234085
lincRNA	BX465208.1	ENSDARG00000097392	797.702	883.503	961	-0.268687	-0.121302
lincRNA	CR855865.1	ENSDARG00000117635	275.55	316.909	332	-0.268868	-0.0671168
lincRNA	CU467655.2	ENSDARG00000117755	396.707	432.148	478	-0.268938	-0.145485
lincRNA	AL845365.1	ENSDARG00000096673	80.4135	89.9217	97	-0.270547	-0.109315
lincRNA	CR555293.1	ENSDARG00000105381	39.6707	32.302	48	-0.274962	-0.571412
lincRNA	CU915770.1	ENSDARG00000117640	262.684	298.575	319	-0.280228	-0.0954632
lincRNA	BX511109.1	ENSDARG00000105604	46.1037	43.6513	56	-0.280543	-0.359402
lincRNA	CU459145.1	ENSDARG00000117660	556.461	591.912	676	-0.280742	-0.191641
lincRNA	BX323830.1	ENSDARG00000117219	269.117	220.876	327	-0.281056	-0.566056
lincRNA	CU856222.1	ENSDARG00000097279	353.819	439.132	430	-0.281324	0.0303187
lincRNA	BX649558.1	ENSDARG00000117270	24.6601	28.8099	30	-0.282782	-0.0583996
lincRNA	CU856621.1	ENSDARG00000095933	94.3518	84.6835	115	-0.285511	-0.44148
lincRNA	FO704648.2	ENSDARG00000117668	150.105	148.414	183	-0.28587	-0.302212
lincRNA	BX548249.1	ENSDARG00000117562	13.9383	27.9368	17	-0.286476	0.716634
lincRNA	BX936303.2	ENSDARG00000117658	13.9383	31.4289	17	-0.286476	0.886559
lincRNA	CABZ01068842.1	ENSDARG00000117599	62.1864	78.5724	76	-0.2894	0.0480225
lincRNA	CABZ01075114.1	ENSDARG00000117719	248.746	260.162	304	-0.2894	-0.224662
lincRNA	BX004991.1	ENSDARG00000096896	78.2691	76.8263	96	-0.294591	-0.321434
lincRNA	BX908385.1	ENSDARG00000117394	40.7428	51.5085	50	-0.295382	0.0428838
lincRNA	BX324006.1	ENSDARG00000105421	23.588	12.2224	29	-0.298002	-1.24653
lincRNA	CU929328.1	ENSDARG00000105332	157.61	242.701	194	-0.299694	0.323125
lincRNA	BX323590.2	ENSDARG00000095388	351.675	387.624	433	-0.300124	-0.15971
lincRNA	BX322555.5	ENSDARG00000117678	3986.36	5625.78	4910	-0.300649	0.19633
lincRNA	BX510960.2	ENSDARG00000110503	390.273	444.37	481	-0.301551	-0.114274
lincRNA	AL929048.1	ENSDARG00000117298	93.2796	105.636	115	-0.302	-0.12253
lincRNA	AL831745.3	ENSDARG00000101436	219.797	262.781	271	-0.302122	-0.0444324
lincRNA	BX255944.1	ENSDARG00000117724	96.4962	109.128	119	-0.302418	-0.124937
lincRNA	AL928714.1	ENSDARG00000117452	132.95	133.573	164	-0.302809	-0.296067
lincRNA	FO834828.1	ENSDARG00000117231	627.225	936.757	775	-0.305213	0.273479
lincRNA	FP236734.1	ENSDARG00000099616	167.26	137.938	207	-0.307538	-0.585609
lincRNA	CR628341.1	ENSDARG00000097018	212.292	188.574	263	-0.309015	-0.479935
lincRNA	BX901954.1	ENSDARG00000098615	318.437	349.21	395	-0.310843	-0.177756
lincRNA	CU694197.2	ENSDARG00000104220	22.5158	19.2066	28	-0.314491	-0.543826
lincRNA	CU927887.1	ENSDARG00000112474	19.2992	19.2066	24	-0.314491	-0.321434
lincRNA	CR354549.4	ENSDARG00000117435	22.5158	25.3178	28	-0.314491	-0.145277
lincRNA	CR293531.1	ENSDARG00000094455	240.168	426.037	299	-0.3161	0.510833
lincRNA	CZQB01066256.1	ENSDARG00000117321	66.4752	83.8105	83	-0.320296	0.01402
lincRNA	CR790382.3	ENSDARG00000104819	56.8255	61.1118	71	-0.32128	-0.216367
lincRNA	CR854941.1	ENSDARG00000117278	454.604	496.752	568	-0.32128	-0.193365
lincRNA	CT033825.1	ENSDARG00000096889	904.92	1088.66	1132	-0.323012	-0.0563156
lincRNA	BX663520.1	ENSDARG00000097950	2102.54	2513.44	2634	-0.325119	-0.0675906
lincRNA	CR354564.1	ENSDARG00000117234	34.3098	36.6671	43	-0.325718	-0.22985
lincRNA	CU062487.1	ENSDARG00000117357	373.119	430.402	468	-0.326874	-0.120824
lincRNA	CR847887.1	ENSDARG00000097226	1082.9	1132.32	1360	-0.328704	-0.264331
lincRNA	CR293509.1	ENSDARG00000105162	141.528	156.272	178	-0.330792	-0.187821
lincRNA	CU929403.2	ENSDARG00000117439	116.868	160.637	147	-0.330941	0.127987
lincRNA	CABZ01117780.1	ENSDARG00000105822	673.329	818.026	847	-0.33105	-0.050216
lincRNA	CU855799.1	ENSDARG00000117386	61.1143	55.0007	77	-0.33335	-0.48541
lincRNA	CR753874.1	ENSDARG00000117794	57.8977	70.7151	73	-0.33439	-0.0458776
lincRNA	CABZ01092746.1	ENSDARG00000117319	365.613	612.864	462	-0.337574	0.407675
lincRNA	mhc1zda	ENSDARG00000086877	1051.81	1145.41	1330	-0.338554	-0.215562
lincRNA	BX511218.1	ENSDARG00000117493	120.084	141.43	152	-0.340026	-0.103981
lincRNA	CR388228.1	ENSDARG00000117809	225.158	235.717	285	-0.340026	-0.273906
lincRNA	CT030129.1	ENSDARG00000105670	2974.23	3371.63	3765	-0.340135	-0.159205
lincRNA	CU693494.3	ENSDARG00000097762	413.861	629.452	524	-0.340419	0.264529
lincRNA	BX663525.2	ENSDARG00000117671	131.878	176.351	167	-0.340643	0.0786041
lincRNA	CU104782.1	ENSDARG00000099770	98.6405	123.97	125	-0.341675	-0.0119402
lincRNA	CABZ01079853.1	ENSDARG00000117488	199.425	206.907	253	-0.343288	-0.290153
lincRNA	AL928977.1	ENSDARG00000094655	184.415	251.432	234	-0.343553	0.103657
lincRNA	CR925755.1	ENSDARG00000097301	104.001	87.3026	132	-0.343934	-0.596441
lincRNA	CU467110.1	ENSDARG00000093438	168.332	223.495	214	-0.346299	0.0626299
lincRNA	BX571675.1	ENSDARG00000117276	11.794	19.2066	15	-0.346912	0.356638
lincRNA	CABZ01074085.1	ENSDARG00000117803	141.528	166.748	180	-0.346912	-0.110327
lincRNA	BX248121.1	ENSDARG00000098049	1237.3	1408.19	1575	-0.348162	-0.161508
lincRNA	CR847531.1	ENSDARG00000097196	3398.81	3962.67	4334	-0.350669	-0.129228
lincRNA	BX649516.3	ENSDARG00000096078	20.3714	25.3178	26	-0.351965	-0.0383618
lincRNA	CR354549.6	ENSDARG00000117597	20.3714	19.2066	26	-0.351965	-0.436911
lincRNA	AL840638.1	ENSDARG00000098608	253.034	371.909	323	-0.3522	0.203416
lincRNA	BX323807.2	ENSDARG00000097707	110.435	128.335	141	-0.352504	-0.135782
lincRNA	BX927376.1	ENSDARG00000117608	95.424	132.7	122	-0.354457	0.121287
lincRNA	BX537342.1	ENSDARG00000097765	170.477	210.399	218	-0.354754	-0.0511981
lincRNA	BX511111.2	ENSDARG00000101943	104.001	117.859	133	-0.354823	-0.17437
lincRNA	BX890624.2	ENSDARG00000117246	303.427	345.718	389	-0.358421	-0.170173
lincRNA	AL845428.1	ENSDARG00000041007	25.7323	14.8414	33	-0.358885	-1.15283
lincRNA	BX005042.1	ENSDARG00000117351	8.57744	9.60329	11	-0.358885	-0.195903
lincRNA	CU651669.1	ENSDARG00000101069	190.848	217.384	245	-0.360358	-0.172539
lincRNA	CR626882.3	ENSDARG00000097755	65.403	58.4928	84	-0.361033	-0.522131
lincRNA	CU855801.1	ENSDARG00000097075	39.6707	39.2862	51	-0.362425	-0.376475
lincRNA	CABZ01062797.1	ENSDARG00000117661	132.95	136.192	171	-0.363109	-0.328353
lincRNA	BX465862.3	ENSDARG00000096099	671.185	851.201	865	-0.365991	-0.023201
lincRNA	BX323560.1	ENSDARG00000117382	189.776	254.051	245	-0.368485	0.0523343
lincRNA	CABZ01025311.1	ENSDARG00000117429	96.4962	123.97	125	-0.373384	-0.0119402
lincRNA	zgc:136683	ENSDARG00000096818	24.6601	25.3178	32	-0.375891	-0.337922
lincRNA	CR548634.1	ENSDARG00000094086	435.305	538.657	565	-0.376224	-0.0688835
lincRNA	CT025909.2	ENSDARG00000117578	134.022	158.891	174	-0.376612	-0.131052
lincRNA	CU467822.1	ENSDARG00000101584	4199.73	4382.59	5454	-0.377019	-0.31553
lincRNA	CABZ01076744.1	ENSDARG00000117274	293.777	274.13	382	-0.37885	-0.478711
lincRNA	FP089536.1	ENSDARG00000103110	51.4646	53.2546	67	-0.38058	-0.331255
lincRNA	CR559945.1	ENSDARG00000102239	10.7218	6.11118	14	-0.38488	-1.1959
lincRNA	CU074419.2	ENSDARG00000093688	16.0827	23.5717	21	-0.38488	0.166667
lincRNA	BX322792.1	ENSDARG00000117506	32.1654	41.9053	42	-0.38488	-0.003258
lincRNA	CABZ01094390.1	ENSDARG00000117598	16.0827	9.60329	21	-0.38488	-1.12879
lincRNA	CR628341.3	ENSDARG00000117333	98.6405	124.843	129	-0.387118	-0.047259
lincRNA	CR847998.1	ENSDARG00000104784	95.424	112.62	125	-0.389504	-0.15046
lincRNA	FP236197.1	ENSDARG00000117541	416.006	380.639	545	-0.389653	-0.517831
lincRNA	BX957260.1	ENSDARG00000096352	337.737	412.941	443	-0.391408	-0.10137
lincRNA	CU929451.2	ENSDARG00000098395	494.275	492.387	649	-0.392905	-0.398426
lincRNA	BX511111.1	ENSDARG00000100491	81.4857	98.652	107	-0.392993	-0.117191
lincRNA	CABZ01083815.1	ENSDARG00000105488	18.2271	21.8257	24	-0.396953	-0.137009
lincRNA	CU179758.1	ENSDARG00000094815	345.242	467.942	455	-0.398259	0.0404634
lincRNA	AL954142.3	ENSDARG00000117430	31.0932	38.4132	41	-0.399024	-0.0940235
lincRNA	BX323550.3	ENSDARG00000117544	31.0932	40.1592	41	-0.399024	-0.0298931
lincRNA	AL929396.1	ENSDARG00000096530	121.156	124.843	160	-0.401202	-0.35796
lincRNA	BX088688.1	ENSDARG00000096502	141.528	184.209	187	-0.401953	-0.0216983
lincRNA	BX322618.2	ENSDARG00000096598	25.7323	20.9526	34	-0.401953	-0.698403
lincRNA	CABZ01087025.1	ENSDARG00000117232	12.8662	16.5875	17	-0.401953	-0.0354384
lincRNA	BX469902.1	ENSDARG00000097953	176.91	144.922	234	-0.403496	-0.691228
lincRNA	CR456627.1	ENSDARG00000104543	171.549	322.147	227	-0.404073	0.505025
lincRNA	CR847939.1	ENSDARG00000100639	94.3518	142.303	125	-0.405806	0.187041
lincRNA	BX664750.3	ENSDARG00000097586	48.2481	68.9691	64	-0.4076	0.107878
lincRNA	BX649349.2	ENSDARG00000096131	7.50526	11.3493	10	-0.414026	0.182609
lincRNA	BX649398.1	ENSDARG00000097195	7.50526	10.4763	10	-0.414026	0.0671313
lincRNA	BX571712.2	ENSDARG00000097985	22.5158	27.0638	30	-0.414026	-0.148597
lincRNA	LO017716.1	ENSDARG00000117778	7.50526	10.4763	10	-0.414026	0.0671313
lincRNA	CABZ01058452.1	ENSDARG00000117623	134.022	215.637	179	-0.417485	0.268648
lincRNA	CR848032.1	ENSDARG00000102710	32.1654	34.048	43	-0.418827	-0.336766
lincRNA	BX957317.2	ENSDARG00000096312	764.464	856.439	1023	-0.420285	-0.256384
lincRNA	CABZ01064405.1	ENSDARG00000117390	24.6601	25.3178	33	-0.420285	-0.382316
lincRNA	BX511073.1	ENSDARG00000117819	41.815	36.6671	56	-0.421406	-0.610941
lincRNA	CU138542.1	ENSDARG00000099036	17.1549	20.0796	23	-0.423015	-0.195903
lincRNA	CABZ01062796.1	ENSDARG00000117515	68.6195	82.0645	92	-0.423015	-0.164876
lincRNA	CR769769.3	ENSDARG00000105506	19.2992	22.6987	26	-0.429968	-0.195903
lincRNA	CABZ01043956.1	ENSDARG00000117634	19.2992	28.8099	26	-0.429968	0.148051
lincRNA	CU695077.1	ENSDARG00000096325	120.084	140.557	162	-0.431948	-0.204836
lincRNA	AL935294.2	ENSDARG00000104739	172.621	185.082	233	-0.432722	-0.332169
lincRNA	CR361560.1	ENSDARG00000117354	42.8872	60.2388	58	-0.435506	0.0546404
lincRNA	BX510301.2	ENSDARG00000117694	47.1759	68.096	64	-0.440021	0.0894991
lincRNA	CT573316.1	ENSDARG00000097312	53.609	72.4612	73	-0.445421	-0.0106882
lincRNA	BX548015.1	ENSDARG00000092278	13.9383	23.5717	19	-0.446941	0.311057
lincRNA	BX119963.4	ENSDARG00000117577	30.021	44.5243	41	-0.44965	0.11897
lincRNA	BX936284.1	ENSDARG00000104512	76.1248	76.8263	104	-0.450146	-0.436911
lincRNA	CR318673.1	ENSDARG00000117693	16.0827	22.6987	22	-0.451994	0.045105
lincRNA	BX324146.1	ENSDARG00000096422	261.612	358.814	359	-0.456556	-0.000748524
lincRNA	BX571774.1	ENSDARG00000097995	65.403	97.7789	90	-0.460569	0.119599
lincRNA	FP326652.1	ENSDARG00000102045	135.095	223.495	186	-0.461332	0.264938
lincRNA	CU682777.2	ENSDARG00000095832	391.346	556.118	541	-0.467185	0.0397617
lincRNA	BX547930.3	ENSDARG00000096657	66.4752	82.0645	92	-0.468819	-0.164876
lincRNA	BX005124.1	ENSDARG00000098768	137.239	162.383	190	-0.469309	-0.2266
lincRNA	BX511132.1	ENSDARG00000097960	77.197	76.8263	107	-0.470995	-0.477938
lincRNA	CU467822.2	ENSDARG00000101727	169.404	210.399	235	-0.472189	-0.159531
lincRNA	BX470185.1	ENSDARG00000092120	25.7323	37.5401	36	-0.484416	0.0604367
lincRNA	BX914214.2	ENSDARG00000099293	10.7218	9.60329	15	-0.484416	-0.643362
lincRNA	CR936371.2	ENSDARG00000117302	36.4541	61.9849	51	-0.484416	0.281419
lincRNA	CABZ01064408.1	ENSDARG00000117304	12.8662	15.7145	18	-0.484416	-0.195903
lincRNA	CU019632.1	ENSDARG00000117771	10.7218	13.9684	15	-0.484416	-0.102794
lincRNA	CR788248.1	ENSDARG00000096053	382.768	592.785	537	-0.488451	0.142586
lincRNA	CR354540.2	ENSDARG00000117517	362.397	406.83	512	-0.498574	-0.331717
lincRNA	CR855375.2	ENSDARG00000097050	28.9489	28.8099	41	-0.502118	-0.509061
lincRNA	BX908744.1	ENSDARG00000117684	28.9489	33.175	41	-0.502118	-0.305528
lincRNA	CU914156.1	ENSDARG00000096694	26.8045	34.921	38	-0.503524	-0.121902
lincRNA	CR384075.1	ENSDARG00000117645	3289.45	3492.98	4692	-0.512358	-0.425745
lincRNA	BX663503.2	ENSDARG00000098044	603.637	754.295	863	-0.515679	-0.194232
lincRNA	CU638693.2	ENSDARG00000096924	16.0827	16.5875	23	-0.516124	-0.471538
lincRNA	CU459056.2	ENSDARG00000117508	16.0827	26.1908	23	-0.516124	0.187426
lincRNA	CR392001.4	ENSDARG00000117805	32.1654	39.2862	46	-0.516124	-0.227612
lincRNA	LO016985.1	ENSDARG00000117579	46.1037	53.2546	66	-0.517582	-0.30956
lincRNA	CABZ01072848.1	ENSDARG00000117786	276.622	312.543	396	-0.517582	-0.341444
lincRNA	BX470264.1	ENSDARG00000097892	87.9188	103.017	126	-0.519181	-0.29054
lincRNA	CABZ01112025.1	ENSDARG00000117751	111.507	123.97	160	-0.520941	-0.368084
lincRNA	CR548634.2	ENSDARG00000097585	107.218	141.43	154	-0.522383	-0.12284
lincRNA	BX511166.1	ENSDARG00000104963	25.7323	39.2862	37	-0.523944	0.0864967
lincRNA	CABZ01067151.2	ENSDARG00000117445	474.976	594.531	683	-0.524032	-0.200134
lincRNA	CU681842.1	ENSDARG00000102795	358.108	442.624	515	-0.524177	-0.21849
lincRNA	BX649349.1	ENSDARG00000094545	11.794	13.0954	17	-0.527484	-0.376475
lincRNA	CU062647.1	ENSDARG00000117397	11.794	10.4763	17	-0.527484	-0.698403
lincRNA	LO018605.2	ENSDARG00000117345	21.4436	24.4447	31	-0.531721	-0.342744
lincRNA	CU179729.1	ENSDARG00000117564	52.5368	61.1118	76	-0.532671	-0.314548
lincRNA	BX927374.2	ENSDARG00000117534	50.3925	67.223	73	-0.534689	-0.118941
lincRNA	FP074874.3	ENSDARG00000105724	9.64962	4.36513	14	-0.536883	-1.68133
lincRNA	CR792457.1	ENSDARG00000117454	34.3098	44.5243	50	-0.543309	-0.167334
lincRNA	FP102806.1	ENSDARG00000117254	396.707	681.833	579	-0.545491	0.235856
lincRNA	CR932360.1	ENSDARG00000096696	15.0105	19.2066	22	-0.55153	-0.195903
lincRNA	AL808121.1	ENSDARG00000097213	7.50526	9.60329	11	-0.55153	-0.195903
lincRNA	CU571163.1	ENSDARG00000099520	7.50526	11.3493	11	-0.55153	0.045105
lincRNA	CABZ01044022.1	ENSDARG00000117317	15.0105	36.6671	22	-0.55153	0.736983
lincRNA	AL928707.2	ENSDARG00000098039	27.8767	46.2704	41	-0.556565	0.174465
lincRNA	BX663503.1	ENSDARG00000092142	996.055	1235.33	1470	-0.561519	-0.250917
lincRNA	CR388373.2	ENSDARG00000095139	573.616	488.895	847	-0.562276	-0.792838
lincRNA	CABZ01118004.1	ENSDARG00000117218	69.6917	79.4454	103	-0.563586	-0.374609
lincRNA	CABZ01077176.1	ENSDARG00000117221	69.6917	86.4296	103	-0.563586	-0.253047
lincRNA	CU929359.1	ENSDARG00000096691	689.412	698.421	1019	-0.563716	-0.544985
lincRNA	BX323060.3	ENSDARG00000105651	145.816	253.178	216	-0.566878	0.229119
lincRNA	CABZ01065679.1	ENSDARG00000098342	192.992	254.924	286	-0.567471	-0.16595
lincRNA	CR376741.3	ENSDARG00000117265	128.662	218.257	191	-0.569991	0.192452
lincRNA	CR848844.1	ENSDARG00000097536	188.704	179.843	281	-0.574448	-0.643829
lincRNA	CR381700.1	ENSDARG00000102174	10.7218	6.98421	16	-0.577525	-1.1959
lincRNA	CABZ01005379.1	ENSDARG00000117637	251.962	302.94	376	-0.577525	-0.3117
lincRNA	BX601648.1	ENSDARG00000105319	16.0827	16.5875	24	-0.577525	-0.532938
lincRNA	CR381534.1	ENSDARG00000098564	164.044	199.05	245	-0.578703	-0.299651
lincRNA	BX649612.1	ENSDARG00000096293	537.162	792.708	805	-0.583631	-0.0221996
lincRNA	CABZ01092942.1	ENSDARG00000117813	185.487	237.463	278	-0.583766	-0.227381
lincRNA	BX005073.2	ENSDARG00000099964	73.9804	92.5408	111	-0.585344	-0.262398
lincRNA	CU695222.1	ENSDARG00000097132	19.2992	18.3336	29	-0.587509	-0.661567
lincRNA	CU929359.2	ENSDARG00000096784	604.709	605.007	912	-0.592792	-0.592082
lincRNA	AL772300.2	ENSDARG00000117344	45.0316	63.7309	68	-0.594598	-0.0935414
lincRNA	CR354549.7	ENSDARG00000117601	39.6707	49.7625	60	-0.59689	-0.269904
lincRNA	BX927329.2	ENSDARG00000117571	34.3098	48.8895	52	-0.599893	-0.0889879
lincRNA	CT025776.2	ENSDARG00000117745	8.57744	12.2224	13	-0.599893	-0.0889879
lincRNA	BX469930.1	ENSDARG00000092358	37.5263	60.2388	57	-0.60306	0.0797314
lincRNA	CABZ01063203.1	ENSDARG00000117480	40.7428	57.6197	62	-0.605722	-0.105705
lincRNA	CR388184.1	ENSDARG00000099896	11.794	20.0796	18	-0.609946	0.157734
lincRNA	FP016018.2	ENSDARG00000097015	98.6405	82.0645	151	-0.614296	-0.879719
lincRNA	BX649516.1	ENSDARG00000095099	24.6601	55.8737	38	-0.623819	0.556169
lincRNA	CABZ01079870.1	ENSDARG00000117260	96.4962	113.493	149	-0.626768	-0.392704
lincRNA	BX571794.1	ENSDARG00000097619	47.1759	58.4928	73	-0.629846	-0.319638
lincRNA	CR925728.2	ENSDARG00000097223	6.43308	1.74605	10	-0.636419	-2.51783
lincRNA	BX323797.1	ENSDARG00000099047	6.43308	9.60329	10	-0.636419	-0.0583996
lincRNA	BX784023.2	ENSDARG00000117462	68.6195	60.2388	107	-0.64092	-0.828846
lincRNA	BX322555.1	ENSDARG00000097066	160.827	347.464	251	-0.642178	0.469178
lincRNA	BX294100.1	ENSDARG00000097158	308.788	296.829	482	-0.642417	-0.699401
lincRNA	CR361551.1	ENSDARG00000093471	33.2376	59.3658	52	-0.645696	0.19112
lincRNA	CT027696.1	ENSDARG00000098095	229.446	304.686	359	-0.645826	-0.23666
lincRNA	FP101861.1	ENSDARG00000097189	97.5684	87.3026	153	-0.649046	-0.809435
lincRNA	CR450686.3	ENSDARG00000093787	90.0631	176.351	142	-0.656883	0.312561
lincRNA	CR376741.2	ENSDARG00000117239	35.3819	83.8105	56	-0.662414	0.581705
lincRNA	CU570781.3	ENSDARG00000117342	543.595	653.024	861	-0.663481	-0.398878
lincRNA	CU013548.1	ENSDARG00000096837	10.7218	15.7145	17	-0.664988	-0.113441
lincRNA	CU928046.1	ENSDARG00000099772	139.383	185.082	221	-0.664988	-0.255885
lincRNA	CU896641.1	ENSDARG00000117643	190.848	293.337	303	-0.666894	-0.0467596
lincRNA	BX324202.1	ENSDARG00000117615	28.9489	48.8895	46	-0.668127	0.0878899
lincRNA	BX072559.1	ENSDARG00000097602	18.2271	49.7625	29	-0.669971	0.779006
lincRNA	CR354549.3	ENSDARG00000117406	132.95	156.272	212	-0.673177	-0.440008
lincRNA	CR925728.3	ENSDARG00000097448	46.1037	72.4612	74	-0.682642	-0.030317
lincRNA	BX548015.2	ENSDARG00000096527	242.313	508.101	389	-0.6829	0.385346
lincRNA	AL954187.1	ENSDARG00000096642	11.794	26.1908	19	-0.687949	0.46306
lincRNA	CR589875.2	ENSDARG00000097963	117.94	186.828	190	-0.687949	-0.0242917
lincRNA	BX510923.1	ENSDARG00000094488	1338.08	1945.1	2157	-0.688861	-0.14918
lincRNA	BX914214.1	ENSDARG00000098628	27.8767	16.5875	45	-0.690866	-1.43983
lincRNA	BX005461.1	ENSDARG00000096447	20.3714	34.921	33	-0.69592	0.0816309
lincRNA	CU137680.1	ENSDARG00000097541	37.5263	79.4454	61	-0.700907	0.381154
lincRNA	CR847785.1	ENSDARG00000096300	12.8662	10.4763	21	-0.706808	-1.00326
lincRNA	CR759882.1	ENSDARG00000097207	8.57744	4.36513	14	-0.706808	-1.68133
lincRNA	CR848047.1	ENSDARG00000095906	1141.87	1433.51	1864	-0.707001	-0.378851
lincRNA	BX950868.2	ENSDARG00000104423	48.2481	63.7309	79	-0.711381	-0.309859
lincRNA	BX510941.1	ENSDARG00000070890	26.8045	60.2388	44	-0.715028	0.45319
lincRNA	CR457444.2	ENSDARG00000098581	58.9699	45.3974	97	-0.718006	-1.09538
lincRNA	CR450848.1	ENSDARG00000096892	10.7218	13.9684	18	-0.74745	-0.365828
lincRNA	CU137681.1	ENSDARG00000097605	75.0526	94.2868	126	-0.74745	-0.418295
lincRNA	BX322657.1	ENSDARG00000102448	75.0526	164.129	126	-0.74745	0.381406
lincRNA	FP102192.2	ENSDARG00000103351	388.129	949.853	658	-0.761551	0.529616
lincRNA	BX649622.1	ENSDARG00000095508	11.794	22.6987	20	-0.76195	0.182609
lincRNA	CABZ01083945.1	ENSDARG00000117346	11.794	18.3336	20	-0.76195	-0.125514
lincRNA	BX248113.1	ENSDARG00000096974	30.021	38.4132	51	-0.764523	-0.408897
lincRNA	CABZ01066578.1	ENSDARG00000117255	18.2271	8.73026	31	-0.766186	-1.82817
lincRNA	CABZ01073834.1	ENSDARG00000117781	110.435	141.43	188	-0.767541	-0.410642
lincRNA	CR396585.1	ENSDARG00000097476	6.43308	20.0796	11	-0.773922	0.868227
lincRNA	CR759887.4	ENSDARG00000117451	6.43308	8.73026	11	-0.773922	-0.333407
lincRNA	CR855389.2	ENSDARG00000104489	26.8045	52.3816	46	-0.779159	0.187426
lincRNA	CR385078.2	ENSDARG00000096680	13.9383	16.5875	24	-0.783976	-0.532938
lincRNA	BX322555.2	ENSDARG00000097074	321.654	740.326	556	-0.789575	0.413076
lincRNA	CT033790.2	ENSDARG00000112855	7.50526	9.60329	13	-0.792538	-0.436911
lincRNA	FO904885.3	ENSDARG00000117280	7.50526	12.2224	13	-0.792538	-0.0889879
lincRNA	LO018256.1	ENSDARG00000117433	22.5158	34.048	39	-0.792538	-0.195903
lincRNA	CABZ01059914.1	ENSDARG00000117655	7.50526	13.0954	13	-0.792538	0.0105478
lincRNA	FP565451.1	ENSDARG00000096700	16.0827	20.0796	28	-0.799917	-0.479696
lincRNA	CABZ01044023.1	ENSDARG00000117734	17.1549	57.6197	30	-0.806344	0.9416
lincRNA	BX784029.3	ENSDARG00000096218	27.8767	30.5559	49	-0.813723	-0.68133
lincRNA	CU571161.1	ENSDARG00000097332	47.1759	65.477	83	-0.815061	-0.342124
lincRNA	CU638693.3	ENSDARG00000097359	9.64962	11.3493	17	-0.816991	-0.582926
lincRNA	CR925737.1	ENSDARG00000117627	48.2481	68.096	85	-0.816991	-0.319892
lincRNA	BX322555.3	ENSDARG00000097247	753.742	1553.99	1329	-0.818198	0.225633
lincRNA	CR759845.1	ENSDARG00000097039	20.3714	20.9526	36	-0.821451	-0.780866
lincRNA	CU138509.1	ENSDARG00000097643	13.9383	21.8257	25	-0.84287	-0.195903
lincRNA	BX005156.2	ENSDARG00000094276	61.1143	145.795	110	-0.847923	0.406442
lincRNA	CU570682.1	ENSDARG00000096754	16.0827	19.2066	29	-0.850543	-0.594452
lincRNA	LO017955.1	ENSDARG00000117287	17.1549	32.302	31	-0.853649	0.059354
lincRNA	BX569790.3	ENSDARG00000117468	18.2271	26.1908	33	-0.856384	-0.333407
lincRNA	BX005012.3	ENSDARG00000096021	23.588	38.4132	43	-0.866286	-0.162736
lincRNA	FP015860.1	ENSDARG00000117389	142.6	282.861	260	-0.866538	0.121579
lincRNA	CR377211.3	ENSDARG00000094988	30.021	57.6197	55	-0.873458	0.0671313
lincRNA	CABZ01067169.1	ENSDARG00000117518	135.095	191.193	248	-0.876369	-0.375312
lincRNA	FP236356.1	ENSDARG00000091233	16.0827	22.6987	30	-0.899453	-0.402354
lincRNA	CR391910.2	ENSDARG00000093592	8.57744	14.8414	16	-0.899453	-0.10844
lincRNA	CT961047.1	ENSDARG00000096900	5.3609	9.60329	10	-0.899453	-0.0583996
lincRNA	si:dkey-48g21.7	ENSDARG00000100707	16.0827	19.2066	30	-0.899453	-0.643362
lincRNA	CR457444.5	ENSDARG00000103773	15.0105	12.2224	28	-0.899453	-1.1959
lincRNA	CABZ01084575.1	ENSDARG00000117384	31.0932	17.4605	58	-0.899453	-1.73196
lincRNA	CU929094.1	ENSDARG00000117438	12.8662	16.5875	24	-0.899453	-0.532938
lincRNA	BX248410.4	ENSDARG00000117503	8.57744	16.5875	16	-0.899453	0.0520244
lincRNA	BX005011.1	ENSDARG00000117628	16.0827	35.7941	30	-0.899453	0.254758
lincRNA	AL929237.2	ENSDARG00000095450	45.0316	63.7309	85	-0.916527	-0.415469
lincRNA	CR847984.2	ENSDARG00000104562	69.6917	126.589	133	-0.932368	-0.0712764
lincRNA	CR396595.2	ENSDARG00000117473	12.8662	9.60329	25	-0.958347	-1.38033
lincRNA	CR762470.1	ENSDARG00000093815	9.64962	18.3336	19	-0.977456	-0.0515132
lincRNA	CU972512.1	ENSDARG00000096978	61.1143	108.255	121	-0.985426	-0.16057
lincRNA	CT737162.3	ENSDARG00000117540	47.1759	72.4612	95	-1.00988	-0.390719
lincRNA	BX088603.3	ENSDARG00000117713	6.43308	9.60329	13	-1.01493	-0.436911
lincRNA	BX088596.2	ENSDARG00000102844	51.4646	73.3342	105	-1.02874	-0.517831
lincRNA	CR383668.1	ENSDARG00000103202	5.3609	21.8257	11	-1.03696	0.988521
lincRNA	CABZ01071874.1	ENSDARG00000117337	58.9699	51.5085	123	-1.06061	-1.25577
lincRNA	CR855277.3	ENSDARG00000093926	523.224	1457.95	1095	-1.06543	0.413014
lincRNA	BX649471.1	ENSDARG00000096641	23.588	30.5559	50	-1.08388	-0.710476
lincRNA	CU655870.1	ENSDARG00000101035	7.50526	10.4763	16	-1.0921	-0.610941
lincRNA	CABZ01079276.1	ENSDARG00000117717	963.89	2764.87	2062	-1.0971	0.423169
lincRNA	BX901968.1	ENSDARG00000096815	18.2271	35.7941	39	-1.09739	-0.123753
lincRNA	CR450698.1	ENSDARG00000096674	6.43308	13.9684	14	-1.12185	-0.003258
lincRNA	CU861501.1	ENSDARG00000097744	9.64962	18.3336	21	-1.12185	-0.195903
lincRNA	BX571712.1	ENSDARG00000097833	6.43308	10.4763	14	-1.12185	-0.418295
lincRNA	CR788237.2	ENSDARG00000101839	6.43308	12.2224	14	-1.12185	-0.195903
lincRNA	CU855688.2	ENSDARG00000117789	21.4436	72.4612	47	-1.13211	0.624548
lincRNA	CU469524.2	ENSDARG00000117664	11.794	14.8414	26	-1.14046	-0.80888
lincRNA	LO017725.2	ENSDARG00000117723	20.3714	13.9684	45	-1.14338	-1.68776
lincRNA	CR626902.1	ENSDARG00000096607	8.57744	6.98421	19	-1.14738	-1.44383
lincRNA	CR385050.2	ENSDARG00000117264	13.9383	35.7941	31	-1.15321	0.207453
lincRNA	BX248331.4	ENSDARG00000113956	5.3609	6.98421	12	-1.16249	-0.780866
lincRNA	LO018107.1	ENSDARG00000117741	12.8662	7.85724	29	-1.17247	-1.88396
lincRNA	CABZ01044746.1	ENSDARG00000117312	744.093	991.758	1704	-1.19537	-0.780866
lincRNA	CR385026.2	ENSDARG00000097922	6.43308	13.9684	15	-1.22138	-0.102794
lincRNA	CR678435.1	ENSDARG00000102570	4.28872	6.98421	10	-1.22138	-0.517831
lincRNA	CR457444.4	ENSDARG00000103425	4.28872	4.36513	10	-1.22138	-1.1959
lincRNA	CU855688.1	ENSDARG00000117491	38.5985	118.732	90	-1.22138	0.399707
lincRNA	BX323987.1	ENSDARG00000097745	18.2271	34.921	43	-1.23825	-0.30024
lincRNA	CR376741.5	ENSDARG00000117362	13.9383	18.3336	33	-1.24341	-0.84798
lincRNA	FO907118.1	ENSDARG00000117242	11.794	6.11118	28	-1.24738	-2.1959
lincRNA	BX908386.1	ENSDARG00000098316	7.50526	20.0796	18	-1.26202	0.157734
lincRNA	FO203364.1	ENSDARG00000117612	7.50526	17.4605	18	-1.26202	-0.0439
lincRNA	CR854926.1	ENSDARG00000103429	20.3714	32.302	49	-1.26624	-0.60116
lincRNA	CU929094.2	ENSDARG00000117709	5.3609	8.73026	13	-1.27796	-0.574415
lincRNA	BX936305.2	ENSDARG00000117440	11.794	25.3178	29	-1.298	-0.195903
lincRNA	FP016142.2	ENSDARG00000098571	4.28872	2.61908	11	-1.35888	-2.07037
lincRNA	BX255908.1	ENSDARG00000099832	4.28872	16.5875	11	-1.35888	0.592593
lincRNA	CU639397.1	ENSDARG00000103179	4.28872	4.36513	11	-1.35888	-1.33341
lincRNA	BX957346.2	ENSDARG00000097128	6.43308	6.98421	17	-1.40195	-1.28337
lincRNA	CR855277.4	ENSDARG00000117568	18.2271	70.7151	49	-1.4267	0.529237
lincRNA	BX000985.1	ENSDARG00000099469	5.3609	7.85724	15	-1.48442	-0.932869
lincRNA	BX510319.1	ENSDARG00000096772	41.815	122.224	118	-1.49669	0.0507369
lincRNA	CR354549.9	ENSDARG00000117686	11.794	34.921	34	-1.52748	0.0385622
lincRNA	CR848749.2	ENSDARG00000117594	18.2271	22.6987	53	-1.53991	-1.22338
lincRNA	FP236850.1	ENSDARG00000097194	4.28872	5.23816	13	-1.59989	-1.31138
lincRNA	CU972454.4	ENSDARG00000105667	18.2271	29.6829	56	-1.61935	-0.915795
lincRNA	AL772373.1	ENSDARG00000117427	17.1549	52.3816	54	-1.65434	-0.0439
lincRNA	CR936442.1	ENSDARG00000105592	58.9699	144.049	189	-1.68034	-0.391823
lincRNA	BX323876.1	ENSDARG00000104070	3.21654	6.11118	11	-1.77392	-0.84798
lincRNA	AL772300.1	ENSDARG00000097343	4.28872	9.60329	15	-1.80634	-0.643362
lincRNA	CR388095.2	ENSDARG00000117604	4.28872	27.0638	15	-1.80634	0.851403
lincRNA	FO704756.1	ENSDARG00000105309	8.57744	30.5559	31	-1.85365	-0.0208164
lincRNA	CT573186.2	ENSDARG00000096555	6.43308	18.3336	24	-1.89945	-0.388548
lincRNA	CABZ01056054.1	ENSDARG00000117263	11.794	42.7783	44	-1.89945	-0.0406248
lincRNA	BX510938.1	ENSDARG00000105754	5.3609	13.9684	21	-1.96984	-0.58822
lincRNA	CR855277.2	ENSDARG00000092801	65.403	255.797	272	-2.05618	-0.0886091
lincRNA	BX511151.1	ENSDARG00000117698	3.21654	15.7145	14	-2.12185	0.166667
lincRNA	CT573186.1	ENSDARG00000093663	5.3609	20.0796	24	-2.16249	-0.257304
lincRNA	CR545469.2	ENSDARG00000117576	2.14436	5.23816	10	-2.22138	-0.932869
lincRNA	CABZ01079280.1	ENSDARG00000117659	120.084	1010.96	567	-2.2393	0.834312
lincRNA	CR293531.2	ENSDARG00000117235	7.50526	53.2546	48	-2.67706	0.149872
lincRNA	CT027638.1	ENSDARG00000096403	7103.19	12424.9	46978	-2.72545	-1.91875
lincRNA	BX005332.1	ENSDARG00000098042	2.14436	9.60329	16	-2.89945	-0.736471
lincRNA	CABZ01038493.1	ENSDARG00000117625	17.1549	247.939	132	-2.94385	0.90945
lincRNA	BX294383.2	ENSDARG00000117773	2.14436	2.61908	18	-3.06938	-2.78087
lincRNA	CABZ01032351.1	ENSDARG00000117286	3.21654	67.223	54	-4.06938	0.315996
lincRNA	BX908756.1	ENSDARG00000096630	0	1.74605	10	-5	-2.51783
miRNA	dre-mir-17a-1	ENSDARG00000104155	40.7428	21.8257	2	4.34847	3.44795
miRNA	dre-mir-9-5	ENSDARG00000081362	108.29	97.7789	6	4.1738	4.02649
miRNA	dre-mir-203a	ENSDARG00000081779	28.9489	24.4447	2	3.85543	3.61145
miRNA	dre-mir-192	ENSDARG00000080041	126.517	41.9053	13	3.28275	1.68862
miRNA	dre-mir-9-3	ENSDARG00000080594	23.588	13.0954	3	2.97502	2.12603
miRNA	dre-mir-27c	ENSDARG00000083181	15.0105	15.7145	2	2.9079	2.97402
miRNA	dre-let-7c-1	ENSDARG00000081442	21.4436	14.8414	3	2.83751	2.3066
miRNA	dre-mir-18a	ENSDARG00000098078	35.3819	36.6671	5	2.82301	2.87449
miRNA	AL590150.1	ENSDARG00000083126	76.1248	45.3974	12	2.66533	1.91957
miRNA	dre-mir-216b	ENSDARG00000083359	18.2271	12.2224	3	2.60305	2.02649
miRNA	dre-mir-194a	ENSDARG00000080851	53.609	30.5559	9	2.57448	1.76345
miRNA	dre-mir-125c	ENSDARG00000080508	10.7218	13.9684	2	2.42248	2.8041
miRNA	dre-mir-99-1	ENSDARG00000082197	16.0827	13.9684	3	2.42248	2.21913
miRNA	dre-mir-130c-1	ENSDARG00000082394	147.961	114.366	28	2.40172	2.03017
miRNA	dre-mir-18c	ENSDARG00000082778	20.3714	15.7145	4	2.34847	1.97402
miRNA	dre-mir-9-6	ENSDARG00000082766	33.2376	15.7145	7	2.24739	1.16667
miRNA	dre-mir-190b	ENSDARG00000083122	51.4646	34.048	11	2.22608	1.63007
miRNA	dre-mir-203b	ENSDARG00000083357	115.795	56.7467	28	2.04808	1.01911
miRNA	dre-mir-183	ENSDARG00000080467	42.8872	11.3493	11	1.96304	0.045105
miRNA	dre-mir-23a-3	ENSDARG00000083526	13.9383	11.3493	4	1.80099	1.50454
miRNA	dre-mir-34a	ENSDARG00000081220	37.5263	42.7783	11	1.7704	1.95938
miRNA	dre-mir-459	ENSDARG00000080051	16.0827	20.0796	5	1.68551	2.00573
miRNA	dre-mir-194b	ENSDARG00000088287	12.8662	11.3493	4	1.68551	1.50454
miRNA	mir196c	ENSDARG00000106838	21.4436	12.2224	7	1.61512	0.804097
miRNA	dre-mir-7149	ENSDARG00000101558	30.021	34.048	10	1.58597	1.76757
miRNA	dre-let-7f	ENSDARG00000082942	40.7428	30.5559	15	1.44158	1.02649
miRNA	dre-mir-216a	ENSDARG00000081608	10.7218	14.8414	4	1.42248	1.89156
miRNA	dre-mir-200b	ENSDARG00000081868	23.588	22.6987	9	1.39005	1.33461
miRNA	BX470083.5	ENSDARG00000115788	39.6707	16.5875	16	1.31	0.0520244
miRNA	dre-mir-27a	ENSDARG00000082454	24.6601	20.0796	10	1.30218	1.00573
miRNA	dre-mir-9-4	ENSDARG00000083496	72.9082	48.0164	30	1.28112	0.678566
miRNA	dre-mir-200a	ENSDARG00000081399	13.9383	23.5717	6	1.21602	1.97402
miRNA	dre-mir-19c	ENSDARG00000082428	27.8767	6.11118	12	1.21602	-0.973511
miRNA	dre-mir-451	ENSDARG00000082898	119.012	74.2072	52	1.19452	0.513048
miRNA	dre-mir-205	ENSDARG00000081646	20.3714	35.7941	9	1.17855	1.99172
miRNA	dre-mir-143	ENSDARG00000082513	122.229	84.6835	55	1.15208	0.62265
miRNA	dre-mir-18b	ENSDARG00000080931	41.815	47.1434	19	1.13802	1.31106
miRNA	dre-mir-181a-2	ENSDARG00000080758	10.7218	15.7145	5	1.10055	1.65209
miRNA	dre-mir-190a	ENSDARG00000081636	21.4436	22.6987	10	1.10055	1.18261
miRNA	BX465862.1	ENSDARG00000081841	15.0105	13.9684	7	1.10055	0.996742
miRNA	dre-mir-21-1	ENSDARG00000082187	45.0316	30.5559	21	1.10055	0.541063
miRNA	dre-mir-1-2	ENSDARG00000103352	25.7323	19.2066	12	1.10055	0.678566
miRNA	dre-mir-454b	ENSDARG00000081232	119.012	128.335	56	1.08761	1.19641
miRNA	dre-mir-133b	ENSDARG00000083537	95.424	70.7151	47	1.02169	0.589358
miRNA	dre-mir-499	ENSDARG00000080181	16.0827	13.0954	8	1.00744	0.710988
miRNA	dre-mir-130b	ENSDARG00000080347	35.3819	36.6671	18	0.975016	1.02649
miRNA	dre-mir-301c	ENSDARG00000081488	23.588	20.9526	12	0.975016	0.804097
miRNA	dre-let-7i	ENSDARG00000082738	35.3819	20.9526	19	0.897014	0.141132
miRNA	dre-mir-206-1	ENSDARG00000082396	56.8255	34.921	31	0.874271	0.171829
miRNA	dre-mir-23a-2	ENSDARG00000081477	18.2271	20.0796	10	0.866082	1.00573
miRNA	CR847514.1	ENSDARG00000104603	10.7218	10.4763	6	0.837513	0.804097
miRNA	dre-mir-10c	ENSDARG00000081638	19.2992	17.4605	11	0.81104	0.666593
miRNA	dre-mir-144	ENSDARG00000081589	85.7744	61.1118	49	0.807765	0.31867
miRNA	dre-mir-17a-2	ENSDARG00000080742	22.5158	16.5875	13	0.792425	0.351585
miRNA	dre-mir-92a-1	ENSDARG00000104805	22.5158	24.4447	13	0.792425	0.911012
miRNA	dre-mir-338-3	ENSDARG00000081891	34.3098	34.921	20	0.778619	0.804097
miRNA	dre-mir-301b	ENSDARG00000082169	84.7022	62.8579	51	0.731902	0.301597
miRNA	dre-mir-29b-1	ENSDARG00000080152	18.2271	27.0638	11	0.728578	1.29886
miRNA	dre-mir-145	ENSDARG00000083100	79.3413	64.6039	49	0.69529	0.39884
miRNA	dre-mir-199-3	ENSDARG00000081869	121.156	101.271	75	0.691907	0.433259
miRNA	dre-mir-30d	ENSDARG00000081529	22.5158	32.302	14	0.685509	1.2062
miRNA	CR847953.2	ENSDARG00000081473	17.1549	29.6829	11	0.641115	1.43213
miRNA	dre-mir-204-2	ENSDARG00000081512	17.1549	13.0954	11	0.641115	0.251556
miRNA	dre-mir-1306	ENSDARG00000081904	130.806	115.239	84	0.638967	0.456174
miRNA	dre-mir-126b	ENSDARG00000098981	13.9383	14.8414	9	0.631062	0.721635
miRNA	dre-mir-736	ENSDARG00000083623	62.1864	56.7467	41	0.600976	0.468913
miRNA	CR376766.1	ENSDARG00000099081	51.4646	55.8737	34	0.598047	0.716634
miRNA	dre-mir-31	ENSDARG00000080961	15.0105	8.73026	10	0.585974	-0.195903
miRNA	dre-mir-124-5	ENSDARG00000080174	184.415	148.414	126	0.549532	0.236208
miRNA	dre-mir-2196	ENSDARG00000083886	16.0827	11.3493	11	0.548006	0.045105
miRNA	dre-mir-15a-1	ENSDARG00000080168	12.8662	15.7145	9	0.515584	0.804097
miRNA	dre-mir-22b	ENSDARG00000083432	21.4436	9.60329	15	0.515584	-0.643362
miRNA	CU929237.1	ENSDARG00000081800	63.2586	64.6039	45	0.491337	0.521697
miRNA	dre-mir-218a-2	ENSDARG00000083023	34.3098	20.9526	25	0.456691	-0.254797
miRNA	dre-mir-740	ENSDARG00000082429	35.3819	20.0796	26	0.444501	-0.372781
miRNA	dre-mir-7147	ENSDARG00000102732	20.3714	13.9684	15	0.441584	-0.102794
miRNA	BX470083.2	ENSDARG00000110559	26.8045	7.85724	20	0.422475	-1.34791
miRNA	dre-let-7g-1	ENSDARG00000083280	17.1549	13.9684	13	0.400107	0.103657
miRNA	dre-mir-726	ENSDARG00000082495	55.7534	45.3974	43	0.374722	0.0782719
miRNA	mir140	ENSDARG00000080453	83.63	53.2546	65	0.363581	-0.287534
miRNA	dre-mir-429a	ENSDARG00000081438	19.2992	23.5717	15	0.363581	0.652094
miRNA	dre-mir-153b	ENSDARG00000083395	51.4646	37.5401	40	0.363581	-0.0915664
miRNA	dre-mir-2188	ENSDARG00000089634	64.3308	56.7467	50	0.363581	0.182609
miRNA	dre-mir-221	ENSDARG00000091272	32.1654	32.302	25	0.363581	0.369694
miRNA	dre-mir-22a	ENSDARG00000083597	26.8045	25.3178	21	0.352086	0.26976
miRNA	BX470083.3	ENSDARG00000113637	26.8045	6.11118	21	0.352086	-1.78087
miRNA	dre-mir-184-2	ENSDARG00000083498	13.9383	14.8414	11	0.341555	0.432128
miRNA	dre-mir-9-2	ENSDARG00000080612	36.4541	10.4763	29	0.330029	-1.46892
miRNA	BX248131.1	ENSDARG00000100768	73.9804	58.4928	59	0.326428	-0.0124569
miRNA	dre-mir-457b	ENSDARG00000081375	15.0105	17.4605	12	0.322939	0.541063
miRNA	dre-mir-210	ENSDARG00000083336	15.0105	13.9684	12	0.322939	0.219134
miRNA	dre-mir-26a-2	ENSDARG00000086601	85.7744	93.4138	69	0.313951	0.437039
miRNA	dre-mir-218a-1	ENSDARG00000081745	23.588	27.0638	19	0.312051	0.510366
miRNA	dre-mir-132-2	ENSDARG00000090368	55.7534	63.7309	45	0.309134	0.502068
miRNA	dre-mir-125a-2	ENSDARG00000081044	16.0827	2.61908	13	0.306998	-2.31138
miRNA	dre-mir-92a-2	ENSDARG00000082154	16.0827	15.7145	13	0.306998	0.273582
miRNA	dre-mir-199-2	ENSDARG00000083179	80.4135	33.175	65	0.306998	-0.970343
miRNA	dre-mir-10b-2	ENSDARG00000082918	60.0421	55.8737	49	0.293192	0.189387
miRNA	dre-mir-2192	ENSDARG00000083874	25.7323	26.1908	21	0.293192	0.31867
miRNA	dre-let-7h	ENSDARG00000081815	62.1864	57.6197	51	0.286103	0.176066
miRNA	dre-mir-429b	ENSDARG00000082968	66.4752	60.2388	55	0.273384	0.131262
miRNA	dre-mir-182	ENSDARG00000081095	35.3819	41.0322	30	0.23805	0.451795
miRNA	dre-mir-7146	ENSDARG00000100135	38.5985	20.9526	33	0.226078	-0.655335
miRNA	dre-let-7j	ENSDARG00000080515	52.5368	44.5243	45	0.223404	-0.0153308
miRNA	dre-mir-101b	ENSDARG00000081347	95.424	79.4454	82	0.218728	-0.0456604
miRNA	BX511227.1	ENSDARG00000081303	13.9383	11.3493	12	0.216024	-0.0804259
miRNA	dre-let-7g-2	ENSDARG00000083425	60.0421	54.1276	52	0.207462	0.0578535
miRNA	dre-let-7a-1	ENSDARG00000105504	454.604	496.752	400	0.184611	0.312526
miRNA	dre-mir-301a	ENSDARG00000083420	68.6195	44.5243	61	0.16981	-0.454215
miRNA	dre-mir-130a	ENSDARG00000082938	70.7639	46.2704	65	0.122573	-0.49035
miRNA	dre-mir-153c	ENSDARG00000081163	27.8767	35.7941	26	0.100547	0.461209
miRNA	CABZ01033854.1	ENSDARG00000081661	12.8662	15.7145	12	0.100547	0.389059
miRNA	dre-mir-454a	ENSDARG00000082262	73.9804	53.2546	69	0.100547	-0.37369
miRNA	dre-mir-130c-2	ENSDARG00000083224	20.3714	20.0796	19	0.100547	0.0797314
miRNA	CU855930.1	ENSDARG00000080783	22.5158	32.302	22	0.0334328	0.554119
miRNA	dre-mir-135a	ENSDARG00000081047	21.4436	13.9684	21	0.0301576	-0.58822
miRNA	dre-mir-2184	ENSDARG00000085822	19.2992	37.5401	19	0.0225445	0.982434
miRNA	dre-mir-126a	ENSDARG00000081476	18.2271	29.6829	18	0.0180848	0.721635
miRNA	CABZ01078244.1	ENSDARG00000081883	18.2271	16.5875	18	0.0180848	-0.117901
miRNA	dre-mir-124-6	ENSDARG00000083622	18.2271	27.0638	18	0.0180848	0.588368
miRNA	dre-mir-16b	ENSDARG00000081252	35.3819	38.4132	35	0.0156581	0.134246
miRNA	dre-mir-141	ENSDARG00000080489	46.1037	36.6671	46	0.00324977	-0.327148
miRNA	dre-mir-200c	ENSDARG00000080713	46.1037	36.6671	46	0.00324977	-0.327148
miRNA	dre-mir-133a-2	ENSDARG00000081687	15.0105	11.3493	15	0.0010113	-0.402354
miRNA	dre-mir-733	ENSDARG00000103263	114.723	80.3184	115	-0.00347609	-0.517831
miRNA	dre-let-7c-2	ENSDARG00000080238	10.7218	3.4921	11	-0.0369566	-1.65533
miRNA	BX572621.1	ENSDARG00000108644	16.0827	21.8257	17	-0.0800253	0.36049
miRNA	dre-mir-124-2	ENSDARG00000081311	15.0105	25.3178	16	-0.0920981	0.662078
miRNA	dre-mir-137-2	ENSDARG00000100071	67.5473	85.5566	72	-0.0920981	0.248882
miRNA	dre-mir-148	ENSDARG00000083365	13.9383	6.98421	15	-0.105904	-1.10279
miRNA	dre-mir-152	ENSDARG00000080838	96.4962	116.986	105	-0.121845	0.155941
miRNA	mir1-1	ENSDARG00000088322	24.6601	31.4289	27	-0.130779	0.219134
miRNA	dre-mir-212	ENSDARG00000080565	18.2271	18.3336	20	-0.133918	-0.125514
miRNA	dre-mir-103	ENSDARG00000081583	36.4541	42.7783	40	-0.133918	0.0968787
miRNA	dre-mir-7b	ENSDARG00000081109	11.794	93.4138	13	-0.140461	2.84512
miRNA	BX321905.1	ENSDARG00000106243	20.3714	20.9526	23	-0.175087	-0.134503
miRNA	dre-mir-7148	ENSDARG00000098943	36.4541	41.9053	42	-0.204308	-0.003258
miRNA	dre-mir-26a-3	ENSDARG00000081224	40.7428	47.1434	47	-0.206114	0.00439558
miRNA	dre-mir-24-3	ENSDARG00000080599	21.4436	33.175	25	-0.221381	0.408168
miRNA	dre-mir-128-2	ENSDARG00000083495	17.1549	19.2066	20	-0.221381	-0.0583996
miRNA	dre-mir-2185-1	ENSDARG00000117063	30.021	60.2388	35	-0.221381	0.783338
miRNA	dre-mir-26b	ENSDARG00000080579	28.9489	143.176	34	-0.232028	2.07419
miRNA	dre-mir-107a	ENSDARG00000083423	28.9489	26.1908	34	-0.232028	-0.376475
miRNA	dre-mir-124-3	ENSDARG00000081423	49.3203	46.2704	58	-0.233872	-0.325964
miRNA	dre-mir-2191	ENSDARG00000084219	15.0105	13.9684	18	-0.262023	-0.365828
miRNA	dre-mir-133a-1	ENSDARG00000104548	17.1549	23.5717	21	-0.29177	0.166667
miRNA	dre-mir-1788	ENSDARG00000080888	9.64962	17.4605	12	-0.314491	0.541063
miRNA	dre-mir-460	ENSDARG00000082599	11.794	6.11118	15	-0.346912	-1.29544
miRNA	dre-mir-222a	ENSDARG00000090347	10.7218	1.74605	14	-0.38488	-3.00326
miRNA	dre-mir-2197	ENSDARG00000085733	11.794	7.85724	16	-0.440021	-1.02598
miRNA	dre-mir-129-4	ENSDARG00000082458	32.1654	35.7941	44	-0.451994	-0.297783
miRNA	dre-mir-107b	ENSDARG00000081704	15.0105	13.0954	22	-0.55153	-0.748444
miRNA	dre-mir-142b	ENSDARG00000082467	15.0105	24.4447	22	-0.55153	0.15202
miRNA	dre-mir-181b-2	ENSDARG00000081534	35.3819	34.921	53	-0.582979	-0.601895
miRNA	mir196a-1	ENSDARG00000083309	18.2271	22.6987	28	-0.619345	-0.302818
miRNA	dre-mir-133c	ENSDARG00000080081	21.4436	31.4289	33	-0.621919	-0.0703722
miRNA	dre-mir-16a	ENSDARG00000083213	9.64962	15.7145	15	-0.636419	0.0671313
miRNA	BX663516.1	ENSDARG00000089119	16.0827	34.048	25	-0.636419	0.445643
miRNA	dre-mir-430c-1	ENSDARG00000114485	6.43308	6.11118	10	-0.636419	-0.710476
miRNA	dre-mir-455-2	ENSDARG00000080578	49.3203	32.302	80	-0.697819	-1.30838
miRNA	dre-mir-338-1	ENSDARG00000103334	24.6601	46.2704	40	-0.697819	0.210089
miRNA	dre-mir-15c	ENSDARG00000081366	10.7218	15.7145	18	-0.74745	-0.195903
miRNA	dre-mir-181b-3	ENSDARG00000083588	27.8767	30.5559	47	-0.753602	-0.621209
miRNA	dre-mir-219-1	ENSDARG00000082257	8.57744	13.0954	15	-0.806344	-0.195903
miRNA	CR788249.3	ENSDARG00000110384	9.64962	5.23816	17	-0.816991	-1.6984
miRNA	dre-mir-204-1	ENSDARG00000081105	10.7218	20.0796	19	-0.825452	0.0797314
miRNA	dre-mir-2185-1	ENSDARG00000116255	28.9489	70.7151	52	-0.845005	0.443507
miRNA	dre-mir-125b-3	ENSDARG00000083557	18.2271	8.73026	33	-0.856384	-1.91837
miRNA	dre-mir-181b-1	ENSDARG00000081145	8.57744	8.73026	16	-0.899453	-0.873975
miRNA	dre-mir-2185-1	ENSDARG00000111809	6.43308	11.3493	14	-1.12185	-0.302818
miRNA	dre-mir-129-1	ENSDARG00000082824	5.3609	6.98421	12	-1.16249	-0.780866
miRNA	dre-mir-15b	ENSDARG00000081182	4.28872	9.60329	10	-1.22138	-0.0583996
miRNA	dre-mir-30e-2	ENSDARG00000083500	4.28872	6.98421	10	-1.22138	-0.517831
miRNA	BX649628.4	ENSDARG00000116515	36.4541	83.8105	88	-1.27142	-0.0703722
miRNA	dre-mir-25	ENSDARG00000101889	18.2271	34.921	48	-1.39695	-0.458937
miRNA	dre-mir-93	ENSDARG00000100982	16.0827	36.6671	46	-1.51612	-0.327148
miRNA	dre-mir-732	ENSDARG00000083027	3.21654	6.98421	10	-1.63642	-0.517831
miRNA	dre-mir-19d	ENSDARG00000100879	16.0827	36.6671	51	-1.66499	-0.476011
miRNA	dre-mir-365-1	ENSDARG00000098065	3.21654	5.23816	11	-1.77392	-1.07037
miRNA	CU929317.2	ENSDARG00000108739	3.21654	11.3493	11	-1.77392	0.045105
miRNA	CT583728.11	ENSDARG00000111012	223.013	226.987	803	-1.84827	-1.82279
miRNA	CT583728.9	ENSDARG00000109304	393.49	447.862	1505	-1.93536	-1.74864
miRNA	dre-mir-729	ENSDARG00000081977	2.14436	6.98421	10	-2.22138	-0.517831
miRNA	dre-mir-375-2	ENSDARG00000080708	2.14436	10.4763	13	-2.59989	-0.31138
miscRNA	RF00017	ENSDARG00000110117	6140.37	4015.92	245	4.64747	4.03488
miscRNA	RF00017	ENSDARG00000115479	6697.91	4446.32	645	3.37634	2.78524
miscRNA	RF00017	ENSDARG00000091337	216.58	131.827	23	3.2352	2.51894
miscRNA	RF00017	ENSDARG00000115022	7476.31	5579.51	1163	2.68448	2.26229
miscRNA	RF00017	ENSDARG00000101099	149.033	427.783	31	2.26529	3.78654
miscRNA	RF00017	ENSDARG00000115624	8243.99	3498.22	1812	2.18576	0.949036
miscRNA	RF00017	ENSDARG00000086128	8936.62	2034.15	2089	2.09692	-0.0383856
miscRNA	RF00017	ENSDARG00000109500	364.541	231.352	101	1.85173	1.19573
miscRNA	RF00017	ENSDARG00000109379	27.8767	11.3493	9	1.63106	0.334612
miscRNA	RF00017	ENSDARG00000110209	603.637	378.02	251	1.26599	0.590777
miscRNA	RF00017	ENSDARG00000112836	450.316	319.528	198	1.18544	0.69044
miscRNA	RF00017	ENSDARG00000112225	60389.5	33625.5	26610	1.18233	0.337586
miscRNA	RF00017	ENSDARG00000088254	9335.47	8384.54	4232	1.14138	0.986393
miscRNA	RF00017	ENSDARG00000112210	1374.53	749.93	648	1.08488	0.210761
miscRNA	RF00017	ENSDARG00000103999	547.884	376.274	267	1.03703	0.494945
miscRNA	RF00017	ENSDARG00000112907	67.5473	38.4132	33	1.03343	0.219134
miscRNA	RF00017	ENSDARG00000115919	2769.44	4675.06	1387	0.997627	1.75302
miscRNA	RF00017	ENSDARG00000117196	2011.41	1881.37	1020	0.979638	0.883216
miscRNA	RF00017	ENSDARG00000111044	1570.74	1320.02	824	0.930731	0.679839
miscRNA	RF00017	ENSDARG00000115772	316.293	355.322	167	0.921414	1.08928
miscRNA	RF00017	ENSDARG00000116411	18262.4	18019.3	10203	0.839886	0.820546
miscRNA	RF00017	ENSDARG00000111095	836.3	616.357	479	0.803995	0.363739
miscRNA	RF00017	ENSDARG00000116452	2631.13	2291.69	1513	0.79827	0.599002
miscRNA	RF00017	ENSDARG00000110849	32415.2	42219.5	18701	0.793556	1.1748
miscRNA	RF00017	ENSDARG00000112394	1150.45	742.072	666	0.788603	0.156038
miscRNA	RF00017	ENSDARG00000116946	3610.03	2340.58	2134	0.758451	0.133308
miscRNA	RF00017	ENSDARG00000113868	545.74	370.163	325	0.747773	0.187721
miscRNA	RF00017	ENSDARG00000109517	29308	43825	17467	0.746665	1.32712
miscRNA	RF00017	ENSDARG00000112313	266.973	199.923	164	0.702997	0.285749
miscRNA	RF00017	ENSDARG00000113506	4784.07	3218.85	2971	0.687289	0.115596
miscRNA	RF02250	ENSDARG00000104137	12.8662	16.5875	8	0.685509	1.05202
miscRNA	RF00017	ENSDARG00000109470	1007.85	931.519	640	0.655136	0.541513
miscRNA	RF00017	ENSDARG00000112413	8829.4	7808.35	5637	0.647388	0.47009
miscRNA	RF00017	ENSDARG00000113891	39816.5	40131.3	25432	0.64672	0.658082
miscRNA	RF00017	ENSDARG00000109401	30552.8	33520.7	19612	0.63957	0.773316
miscRNA	RF00017	ENSDARG00000089845	2400.61	1471.92	1589	0.595282	-0.110418
miscRNA	RF00017	ENSDARG00000099163	78.2691	93.4138	53	0.562451	0.817643
miscRNA	RF00017	ENSDARG00000113323	45382.2	45489	30863	0.556247	0.55964
miscRNA	RF00017	ENSDARG00000091697	6558.52	5435.46	4473	0.552128	0.28116
miscRNA	RF00017	ENSDARG00000098483	1765.88	1730.34	1214	0.540619	0.511285
miscRNA	RF00017	ENSDARG00000110258	2858.43	2802.41	1980	0.529723	0.50117
miscRNA	RF00017	ENSDARG00000115645	8660	9349.24	6043	0.519102	0.629584
miscRNA	RF00017	ENSDARG00000105097	11103.5	10508.6	7771	0.514842	0.435401
miscRNA	RF00017	ENSDARG00000115291	2748	2689.79	1924	0.514272	0.483387
miscRNA	RF00017	ENSDARG00000113540	732.299	803.184	520	0.493921	0.627219
miscRNA	RF00017	ENSDARG00000098682	292.705	175.478	211	0.472205	-0.265951
miscRNA	RF00017	ENSDARG00000113172	1190.12	1082.55	873	0.447053	0.310383
miscRNA	RF00017	ENSDARG00000117197	331.304	277.622	244	0.441273	0.186243
miscRNA	RF00017	ENSDARG00000087015	149.033	97.7789	112	0.412133	-0.195903
miscRNA	RF00017	ENSDARG00000116132	48024	49138.3	36092	0.412077	0.445168
miscRNA	RF00017	ENSDARG00000113131	7795.82	6240.39	5891	0.404188	0.083124
miscRNA	RF00017	ENSDARG00000111163	1601.84	1309.54	1223	0.389303	0.098635
miscRNA	RF00017	ENSDARG00000087944	452.46	345.718	349	0.374563	-0.0136297
miscRNA	RF00017	ENSDARG00000112716	10099.9	9811.94	7800	0.3728	0.331065
miscRNA	RF00017	ENSDARG00000115036	4514.95	3825.6	3494	0.36983	0.130807
miscRNA	RF00017	ENSDARG00000111072	664.752	575.324	531	0.324103	0.115664
miscRNA	RF00017	ENSDARG00000089201	509.285	392.862	407	0.323446	-0.0510069
miscRNA	RF00017	ENSDARG00000088785	2685.81	2654	2149	0.321692	0.304503
miscRNA	RF00017	ENSDARG00000114084	4236.18	3943.46	3410	0.312993	0.20969
miscRNA	RF00006	ENSDARG00000086105	47.1759	19.2066	38	0.312051	-0.984399
miscRNA	RF00017	ENSDARG00000089848	602.565	555.245	488	0.304236	0.186243
miscRNA	RF00017	ENSDARG00000114352	4143.98	4120.68	3390	0.28973	0.281599
miscRNA	RF00017	ENSDARG00000114837	12636.7	11057.8	11040	0.194881	0.00231774
miscRNA	RF00017	ENSDARG00000116328	921.003	747.31	805	0.194216	-0.107281
miscRNA	RF00017	ENSDARG00000109767	7118.2	889.614	6277	0.181438	-2.81882
miscRNA	RF00017	ENSDARG00000111350	41684.2	36044.6	36995	0.172171	-0.0375458
miscRNA	RF01951	ENSDARG00000105031	22.5158	24.4447	20	0.170936	0.289524
miscRNA	RF00017	ENSDARG00000112374	38135.3	32180.6	33893	0.170139	-0.0747952
miscRNA	RF00017	ENSDARG00000086634	2687.95	2844.32	2403	0.161672	0.243247
miscRNA	RF00017	ENSDARG00000113827	7963.08	5526.26	7172	0.150951	-0.376073
miscRNA	RF00017	ENSDARG00000109708	898.487	804.057	816	0.138928	-0.0212711
miscRNA	RF00017	ENSDARG00000114253	6737.58	4501.32	6135	0.135167	-0.446714
miscRNA	RF00017	ENSDARG00000114737	22688.4	19818.6	21474	0.0793638	-0.115738
miscRNA	RF00017	ENSDARG00000117058	6219.72	4175.68	5887	0.079316	-0.49552
miscRNA	RF00017	ENSDARG00000113733	2433.85	3037.26	2316	0.071604	0.391134
miscRNA	RF00017	ENSDARG00000087732	217353	182221	207907	0.0641042	-0.190252
miscRNA	rn7sk	ENSDARG00000081270	101868	89872.8	99399	0.035395	-0.145347
miscRNA	RF00019	ENSDARG00000100903	1110.78	891.36	1089	0.028567	-0.288924
miscRNA	RF00006	ENSDARG00000116538	114.723	80.3184	115	-0.00347609	-0.517831
miscRNA	RF00017	ENSDARG00000111064	7474.17	9905.36	8924	-0.255778	0.150518
miscRNA	RF00017	ENSDARG00000115976	453.532	207.78	565	-0.317046	-1.44319
miscRNA	RF00017	ENSDARG00000116384	554.317	472.307	728	-0.393227	-0.624213
miscRNA	RF00017	ENSDARG00000087060	903.848	603.261	1272	-0.492947	-1.07624
miscRNA	RF00017	ENSDARG00000113874	233.735	150.161	363	-0.635094	-1.27346
miscRNA	RF00017	ENSDARG00000114626	352.747	620.722	583	-0.724861	0.0904506
miscRNA	RF00017	ENSDARG00000087770	201.57	104.763	349	-0.791947	-1.7361
scaRNA	RF00424	ENSDARG00000117203	123.301	108.255	51	1.27361	1.08587
scaRNA	RF00564	ENSDARG00000085825	83.63	58.4928	57	0.553059	0.0372961
scaRNA	RF00582	ENSDARG00000105169	321.654	196.431	226	0.509187	-0.202301
scaRNA	RF00582	ENSDARG00000085249	62.1864	45.3974	47	0.403939	-0.0500522
scaRNA	RF00478	ENSDARG00000083760	3131.84	2384.23	2598	0.269608	-0.123875
scaRNA	RF00231	ENSDARG00000083738	4453.84	3857.9	3750	0.248158	0.0409263
scaRNA	RF01268	ENSDARG00000104511	12469.5	12041.7	10978	0.183783	0.133418
scaRNA	RF00553	ENSDARG00000085786	283.055	280.241	265	0.0950925	0.0806779
scaRNA	RF00426	ENSDARG00000086888	52.5368	48.8895	50	0.0714006	-0.0324043
scaRNA	RF00478	ENSDARG00000103474	3313.04	3431.87	3292	0.00918947	0.060029
scaRNA	RF00286	ENSDARG00000103500	20.3714	20.9526	26	-0.351965	-0.31138
snoRNA	RF00067	ENSDARG00000098534	2587.17	156.272	109	4.56897	0.519728
snoRNA	RF00571	ENSDARG00000080775	565.039	411.195	113	2.32203	1.8635
snoRNA	RF00012	ENSDARG00000103728	21.4436	14.8414	5	2.10055	1.56963
snoRNA	RF01848	ENSDARG00000116159	21.4436	14.8414	5	2.10055	1.56963
snoRNA	RF00271	ENSDARG00000109652	166.188	57.6197	40	2.05474	0.526563
snoRNA	RF00407	ENSDARG00000080685	354.892	279.368	86	2.04497	1.69976
snoRNA	RF00571	ENSDARG00000080188	259.468	212.145	67	1.95332	1.66282
snoRNA	RF00411	ENSDARG00000081895	358.108	206.034	95	1.9144	1.11688
snoRNA	RF00325	ENSDARG00000114381	90.0631	59.3658	28	1.68551	1.0842
snoRNA	RF00417	ENSDARG00000083826	411.717	247.066	130	1.66314	0.926387
snoRNA	RF01192	ENSDARG00000085557	141.528	110.001	49	1.53023	1.16667
snoRNA	RF00213	ENSDARG00000105016	82.5579	72.4612	29	1.50935	1.32116
snoRNA	RF00072	ENSDARG00000083582	800.918	611.118	289	1.47059	1.08038
snoRNA	RF00429	ENSDARG00000083842	145.816	115.239	54	1.43312	1.0936
snoRNA	RF01225	ENSDARG00000080777	112.579	106.509	42	1.42248	1.34252
snoRNA	RF00342	ENSDARG00000080462	120.084	81.1914	45	1.41605	0.851403
snoRNA	RF00377	ENSDARG00000081623	85.7744	82.0645	34	1.33501	1.27122
snoRNA	RF00340	ENSDARG00000083089	181.198	163.256	73	1.3116	1.16117
snoRNA	RF00090	ENSDARG00000082930	451.388	235.717	183	1.30252	0.365213
snoRNA	RF00271	ENSDARG00000115288	126.517	116.986	55	1.20183	1.08883
snoRNA	RF00072	ENSDARG00000081440	649.741	622.468	283	1.19906	1.1372
snoRNA	RF00425	ENSDARG00000081850	373.119	275.876	166	1.16845	0.732838
snoRNA	RF01229	ENSDARG00000082290	373.119	313.416	169	1.14261	0.891058
snoRNA	RF00137	ENSDARG00000111793	119.012	97.7789	54	1.14008	0.856564
snoRNA	RF00325	ENSDARG00000112988	61.1143	69.8421	28	1.12608	1.31867
snoRNA	RF00270	ENSDARG00000082652	201.57	172.859	96	1.07017	0.848491
snoRNA	RF00288	ENSDARG00000081972	43.9594	40.1592	21	1.06578	0.935341
snoRNA	RF00397	ENSDARG00000117034	270.189	198.177	135	1.00101	0.55383
snoRNA	RF01848	ENSDARG00000109375	3288.38	989.139	1671	0.976663	-0.756467
snoRNA	RF00012	ENSDARG00000115704	3288.38	989.139	1671	0.976663	-0.756467
snoRNA	RF00271	ENSDARG00000100696	23.588	29.6829	12	0.975016	1.3066
snoRNA	RF00443	ENSDARG00000084628	261.612	205.161	136	0.943821	0.593151
snoRNA	RF00568	ENSDARG00000103384	261.612	204.288	136	0.943821	0.586999
snoRNA	RF00091	ENSDARG00000084991	116.868	65.477	61	0.937994	0.102178
snoRNA	RF00137	ENSDARG00000083150	119.012	110.874	64	0.894963	0.792782
snoRNA	RF00411	ENSDARG00000084209	81.4857	66.35	44	0.889043	0.592593
snoRNA	RF00271	ENSDARG00000115102	72.9082	38.4132	41	0.830458	-0.0940235
snoRNA	RF00070	ENSDARG00000080698	90.0631	72.4612	53	0.764944	0.451216
snoRNA	RF00012	ENSDARG00000116747	160.827	38.4132	95	0.75951	-1.30633
snoRNA	RF00410	ENSDARG00000081648	117.94	69.8421	70	0.752624	-0.003258
snoRNA	RF00137	ENSDARG00000110554	73.9804	62.8579	44	0.74964	0.51459
snoRNA	RF00012	ENSDARG00000111498	34.3098	26.1908	21	0.70823	0.31867
snoRNA	RF00325	ENSDARG00000089164	51.4646	66.35	32	0.685509	1.05202
snoRNA	RF00429	ENSDARG00000084449	84.7022	89.9217	53	0.676407	0.762677
snoRNA	RF00408	ENSDARG00000084995	213.364	138.811	135	0.660356	0.0401643
snoRNA	RF00276	ENSDARG00000116097	75.0526	58.4928	48	0.644867	0.285224
snoRNA	RF01192	ENSDARG00000085291	116.868	106.509	75	0.639913	0.506016
snoRNA	RF00377	ENSDARG00000080493	67.5473	47.1434	44	0.618395	0.0995528
snoRNA	RF00158	ENSDARG00000107036	290.561	254.924	193	0.590239	0.401464
snoRNA	RF00392	ENSDARG00000114781	120.084	103.89	80	0.585974	0.376987
snoRNA	RF00277	ENSDARG00000104878	99.7127	72.4612	68	0.552243	0.0916735
snoRNA	RF00334	ENSDARG00000110189	592.915	420.799	411	0.528688	0.0339917
snoRNA	RF00012	ENSDARG00000109533	54.6812	27.0638	38	0.525045	-0.489634
snoRNA	RF00440	ENSDARG00000085594	17.1549	27.9368	12	0.515584	1.21913
snoRNA	RF00396	ENSDARG00000080840	181.198	116.112	127	0.512742	-0.129305
snoRNA	RF01299	ENSDARG00000082639	142.6	133.573	100	0.511973	0.417629
snoRNA	RF00431	ENSDARG00000084034	204.786	166.748	144	0.508051	0.211601
snoRNA	RF00392	ENSDARG00000112530	189.776	184.209	135	0.491337	0.448381
snoRNA	RF00575	ENSDARG00000080938	102.929	107.382	77	0.418723	0.479825
snoRNA	RF00572	ENSDARG00000080942	102.929	86.4296	77	0.418723	0.166667
snoRNA	RF00096	ENSDARG00000082850	538.234	575.324	404	0.413879	0.51002
snoRNA	RF00012	ENSDARG00000110201	121.156	63.7309	91	0.412931	-0.513873
snoRNA	RF01848	ENSDARG00000113344	121.156	63.7309	91	0.412931	-0.513873
snoRNA	RF01848	ENSDARG00000112219	343.098	207.78	258	0.411248	-0.312313
snoRNA	RF00012	ENSDARG00000114807	343.098	207.78	258	0.411248	-0.312313
snoRNA	RF00415	ENSDARG00000113231	55.7534	41.9053	42	0.408669	-0.003258
snoRNA	RF01290	ENSDARG00000081103	730.154	622.468	551	0.406149	0.175947
snoRNA	RF00191	ENSDARG00000085829	152.25	109.128	116	0.392313	-0.0880998
snoRNA	RF00396	ENSDARG00000080499	96.4962	73.3342	74	0.382947	-0.013039
snoRNA	RF00088	ENSDARG00000080156	99.7127	75.9533	77	0.372919	-0.0197461
snoRNA	RF00137	ENSDARG00000115970	77.197	95.1599	60	0.363581	0.665391
snoRNA	RF00319	ENSDARG00000082611	3266.93	2136.3	2554	0.355178	-0.257647
snoRNA	RF00392	ENSDARG00000113630	55.7534	48.8895	44	0.341555	0.15202
snoRNA	RF00012	ENSDARG00000113745	518.935	356.195	418	0.312051	-0.230837
snoRNA	RF00604	ENSDARG00000080424	16.0827	11.3493	13	0.306998	-0.195903
snoRNA	RF00572	ENSDARG00000084411	100.785	87.3026	82	0.297584	0.0904011
snoRNA	RF01848	ENSDARG00000111813	77.197	10.4763	63	0.293192	-2.58822
snoRNA	RF00012	ENSDARG00000113221	77.197	10.4763	63	0.293192	-2.58822
snoRNA	RF00276	ENSDARG00000116175	79.3413	79.4454	65	0.287633	0.289524
snoRNA	RF01848	ENSDARG00000112553	36.4541	51.5085	30	0.281119	0.779849
snoRNA	RF00012	ENSDARG00000116415	36.4541	51.5085	30	0.281119	0.779849
snoRNA	RF00270	ENSDARG00000085696	91.1353	77.6993	75	0.281119	0.0510117
snoRNA	RF00392	ENSDARG00000115429	122.229	108.255	101	0.275226	0.100082
snoRNA	RF00090	ENSDARG00000102120	5277.27	3195.28	4383	0.267873	-0.455978
snoRNA	RF00096	ENSDARG00000081379	49.3203	26.1908	41	0.266557	-0.646564
snoRNA	RF00440	ENSDARG00000080172	90.0631	82.9375	75	0.264046	0.145134
snoRNA	RF00599	ENSDARG00000086007	293.777	288.972	247	0.250212	0.226417
snoRNA	RF00415	ENSDARG00000114453	67.5473	45.3974	57	0.244937	-0.328353
snoRNA	RF01241	ENSDARG00000083986	749.454	584.928	634	0.241357	-0.116225
snoRNA	RF01234	ENSDARG00000083424	284.128	297.702	241	0.237506	0.304836
snoRNA	RF01291	ENSDARG00000080895	3209.03	2365.03	2728	0.234296	-0.205986
snoRNA	RF00568	ENSDARG00000085485	223.013	163.256	193	0.20853	-0.241466
snoRNA	RF00276	ENSDARG00000115154	50.3925	46.2704	44	0.195704	0.0725858
snoRNA	RF00089	ENSDARG00000082440	106.146	103.89	93	0.190745	0.159756
snoRNA	RF00428	ENSDARG00000084004	36.4541	35.7941	32	0.18801	0.161649
snoRNA	RF00274	ENSDARG00000086733	183.343	182.462	161	0.187483	0.180539
snoRNA	RF00581	ENSDARG00000080372	55.7534	36.6671	49	0.186277	-0.418295
snoRNA	RF00091	ENSDARG00000081943	4214.74	3943.46	3711	0.183635	0.0876538
snoRNA	RF00067	ENSDARG00000113885	4001.38	3452.82	3527	0.182054	-0.030667
snoRNA	RF00092	ENSDARG00000115262	3252.99	3008.45	2870	0.180717	0.0679689
snoRNA	RF00421	ENSDARG00000081937	678.69	807.549	603	0.170594	0.421392
snoRNA	RF00191	ENSDARG00000083389	1512.85	1252.79	1346	0.168587	-0.103531
snoRNA	RF00190	ENSDARG00000081931	675.473	552.626	604	0.16135	-0.128246
snoRNA	RF00045	ENSDARG00000083400	12079.2	9675.75	10838	0.156424	-0.163653
snoRNA	RF00156	ENSDARG00000117085	3154.35	2695.03	2840	0.151453	-0.0755885
snoRNA	RF00560	ENSDARG00000101659	139.383	105.636	126	0.145635	-0.25432
snoRNA	RF00334	ENSDARG00000112208	2073.6	1688.43	1904	0.123101	-0.173349
snoRNA	RF00067	ENSDARG00000098419	984.261	991.758	909	0.114761	0.125708
snoRNA	RF01848	ENSDARG00000110897	142.6	103.89	132	0.111435	-0.345479
snoRNA	RF00012	ENSDARG00000111622	142.6	103.89	132	0.111435	-0.345479
snoRNA	RF01241	ENSDARG00000083699	1581.47	1223.98	1464	0.111346	-0.258332
snoRNA	RF01296	ENSDARG00000083325	2425.27	1918.04	2252	0.106939	-0.231575
snoRNA	RF00591	ENSDARG00000116829	90.0631	68.9691	84	0.100547	-0.28444
snoRNA	RF00045	ENSDARG00000082242	25861	22022.1	24122	0.100427	-0.131398
snoRNA	RF00191	ENSDARG00000082493	703.35	600.642	659	0.0939643	-0.133773
snoRNA	RF00563	ENSDARG00000109437	4849.47	4474.26	4545	0.0935467	-0.0226314
snoRNA	RF00409	ENSDARG00000082419	412.789	349.21	387	0.0930718	-0.148237
snoRNA	RF00092	ENSDARG00000083378	1676.89	1788.83	1573	0.0922688	0.185498
snoRNA	RF00045	ENSDARG00000080823	47967.2	42097.3	45017	0.0915778	-0.0967413
snoRNA	RF00270	ENSDARG00000083171	137.239	116.986	129	0.0893197	-0.141041
snoRNA	RF00091	ENSDARG00000116745	2311.62	2375.5	2185	0.0812709	0.120601
snoRNA	RF00012	ENSDARG00000113149	76.1248	84.6835	72	0.0803691	0.234085
snoRNA	RF00067	ENSDARG00000111557	2974.23	2767.49	2816	0.0788674	-0.0250676
snoRNA	RF01225	ENSDARG00000083885	62.1864	66.35	59	0.0758849	0.169381
snoRNA	RF00099	ENSDARG00000083784	184.415	212.145	175	0.0756006	0.277698
snoRNA	RF00045	ENSDARG00000083108	74769.5	66820.6	71517	0.0641644	-0.0979942
snoRNA	RF00581	ENSDARG00000081946	40.7428	51.5085	39	0.0630723	0.401338
snoRNA	RF00271	ENSDARG00000099827	78.2691	103.89	75	0.0615528	0.470096
snoRNA	RF00096	ENSDARG00000115663	38.5985	13.0954	37	0.0610186	-1.49847
snoRNA	RF00612	ENSDARG00000080205	76.1248	88.1757	74	0.0408407	0.252855
snoRNA	RF00396	ENSDARG00000083576	40.7428	36.6671	40	0.0265464	-0.125514
snoRNA	RF00284	ENSDARG00000083457	60.0421	57.6197	59	0.0252588	-0.034152
snoRNA	RF00611	ENSDARG00000109897	71.8361	69.8421	71	0.016889	-0.0237221
snoRNA	RF00190	ENSDARG00000081082	376.335	363.179	372	0.0167154	-0.0346222
snoRNA	RF00412	ENSDARG00000116621	2904.54	2613.84	2877	0.0137421	-0.138394
snoRNA	RF00016	ENSDARG00000082008	5930.23	5189.27	5877	0.0130074	-0.179549
snoRNA	RF00415	ENSDARG00000100745	98.6405	68.9691	98	0.00939908	-0.506832
snoRNA	RF00056	ENSDARG00000080532	6282.97	5267.84	6249	0.00782229	-0.246414
snoRNA	RF00302	ENSDARG00000085713	3096.46	3025.04	3086	0.00487965	-0.0287858
snoRNA	RF00096	ENSDARG00000080633	31.0932	13.0954	31	0.00433165	-1.24321
snoRNA	RF00613	ENSDARG00000085781	155.466	182.462	155	0.00433165	0.235332
snoRNA	RF00396	ENSDARG00000080647	116.868	101.271	117	-0.00163342	-0.208287
snoRNA	RF00091	ENSDARG00000113571	4662.91	4358.15	4670	-0.00219187	-0.0997077
snoRNA	RF00431	ENSDARG00000084670	129.734	164.129	130	-0.00295761	0.336318
snoRNA	RF01299	ENSDARG00000080523	111.507	91.6678	112	-0.00636823	-0.289012
snoRNA	RF00608	ENSDARG00000081580	41.815	42.7783	42	-0.00636823	0.0264893
snoRNA	RF00056	ENSDARG00000080855	3072.87	2365.9	3089	-0.00755429	-0.38475
snoRNA	RF00611	ENSDARG00000080744	40.7428	58.4928	41	-0.00907752	0.512634
snoRNA	RF00377	ENSDARG00000083434	36.4541	34.921	37	-0.0214436	-0.0834283
snoRNA	RF00271	ENSDARG00000105055	58.9699	80.3184	61	-0.0488307	0.396922
snoRNA	RF00138	ENSDARG00000110758	1946.01	1827.24	2015	-0.0502633	-0.141111
snoRNA	RF01233	ENSDARG00000084543	211.219	244.447	219	-0.0521883	0.158593
snoRNA	RF00611	ENSDARG00000083268	56.8255	66.35	59	-0.0541756	0.169381
snoRNA	RF00012	ENSDARG00000113849	290.561	244.447	303	-0.060478	-0.309794
snoRNA	RF01848	ENSDARG00000114688	290.561	244.447	303	-0.060478	-0.309794
snoRNA	RF00016	ENSDARG00000115047	7464.52	7865.09	7821	-0.0673043	0.00811082
snoRNA	RF00263	ENSDARG00000084828	3332.34	3088.77	3497	-0.0695843	-0.179087
snoRNA	RF00092	ENSDARG00000081702	3359.14	3382.98	3532	-0.0723936	-0.0621921
snoRNA	RF00581	ENSDARG00000083266	41.815	45.3974	44	-0.0734824	0.045105
snoRNA	RF00096	ENSDARG00000109514	39.6707	31.4289	42	-0.0823171	-0.418295
snoRNA	RF00186	ENSDARG00000081654	7270.45	7318.58	7750	-0.0921513	-0.0826328
snoRNA	RF00302	ENSDARG00000083937	2604.32	2464.55	2784	-0.0962498	-0.175833
snoRNA	RF00322	ENSDARG00000084532	3788.01	3795.92	4055	-0.0982612	-0.095253
snoRNA	RF01296	ENSDARG00000081126	7354.08	7260.09	7891	-0.101663	-0.120221
snoRNA	RF01233	ENSDARG00000084548	35.3819	56.7467	38	-0.102986	0.578537
snoRNA	RF00613	ENSDARG00000081961	2513.19	2181.69	2709	-0.108241	-0.312313
snoRNA	RF00563	ENSDARG00000115852	2166.88	2551.86	2336	-0.108424	0.127506
snoRNA	RF00012	ENSDARG00000111254	34.3098	61.9849	37	-0.108906	0.744391
snoRNA	RF01848	ENSDARG00000116406	34.3098	61.9849	37	-0.108906	0.744391
snoRNA	RF00218	ENSDARG00000085358	2431.7	2325.74	2635	-0.115835	-0.180112
snoRNA	RF00591	ENSDARG00000112580	138.311	150.161	150	-0.117044	0.00154299
snoRNA	RF00302	ENSDARG00000083894	2537.85	2601.62	2756	-0.118969	-0.0831666
snoRNA	RF00212	ENSDARG00000106293	2190.46	2244.55	2390	-0.125774	-0.0905841
snoRNA	RF00581	ENSDARG00000081802	50.3925	46.2704	55	-0.126224	-0.249342
snoRNA	RF00012	ENSDARG00000109928	151.177	118.732	166	-0.134941	-0.48348
snoRNA	RF01299	ENSDARG00000083056	100.785	103.017	111	-0.13928	-0.107676
snoRNA	RF01190	ENSDARG00000098998	87.9188	72.4612	97	-0.141814	-0.420776
snoRNA	RF00211	ENSDARG00000080422	2308.4	2371.14	2553	-0.145298	-0.106613
snoRNA	RF00211	ENSDARG00000082213	1518.21	1642.16	1690	-0.154655	-0.0414265
snoRNA	RF00069	ENSDARG00000109264	2621.48	2599	2924	-0.157562	-0.169987
snoRNA	RF00093	ENSDARG00000082911	3833.04	4068.3	4276	-0.157772	-0.071835
snoRNA	RF00309	ENSDARG00000109557	141.528	152.78	158	-0.15884	-0.0484727
snoRNA	RF00093	ENSDARG00000080158	1684.39	1534.78	1891	-0.166919	-0.301117
snoRNA	RF01848	ENSDARG00000099125	47.1759	74.2072	53	-0.167942	0.485567
snoRNA	RF00012	ENSDARG00000116506	47.1759	74.2072	53	-0.167942	0.485567
snoRNA	RF00581	ENSDARG00000081450	2654.72	2573.68	2988	-0.170622	-0.215347
snoRNA	RF00138	ENSDARG00000110617	3658.28	3781.08	4120	-0.17148	-0.123847
snoRNA	RF00016	ENSDARG00000113056	4985.64	5006.81	5616	-0.171765	-0.165653
snoRNA	RF00012	ENSDARG00000109750	5953.81	5724.43	6723	-0.175291	-0.231972
snoRNA	RF01848	ENSDARG00000109762	5953.81	5724.43	6723	-0.175291	-0.231972
snoRNA	RF00322	ENSDARG00000085301	3524.26	3676.31	3997	-0.181599	-0.120658
snoRNA	RF00609	ENSDARG00000081875	1659.73	1943.36	1884	-0.182847	0.0447516
snoRNA	RF00133	ENSDARG00000081568	3838.4	4070.05	4362	-0.184483	-0.0999438
snoRNA	RF00151	ENSDARG00000082811	5341.6	5817.85	6071	-0.184662	-0.0614488
snoRNA	RF00265	ENSDARG00000082020	2453.15	2511.7	2796	-0.18873	-0.154702
snoRNA	RF00613	ENSDARG00000083256	6156.46	5496.57	7021	-0.189576	-0.353144
snoRNA	RF00089	ENSDARG00000082087	71.8361	66.35	82	-0.190916	-0.305528
snoRNA	RF00049	ENSDARG00000080936	2900.25	3156.86	3312	-0.191527	-0.0692111
snoRNA	RF00152	ENSDARG00000080924	37.5263	47.1434	43	-0.196435	0.13272
snoRNA	RF00093	ENSDARG00000082511	2438.14	2736.06	2800	-0.199648	-0.0333247
snoRNA	RF00276	ENSDARG00000111586	58.9699	61.9849	68	-0.205556	-0.133619
snoRNA	RF00049	ENSDARG00000082739	3280.87	3453.69	3795	-0.210021	-0.135961
snoRNA	RF00093	ENSDARG00000080636	2518.55	2563.21	2927	-0.216829	-0.191474
snoRNA	RF00211	ENSDARG00000115494	2814.47	2965.67	3290	-0.225223	-0.149729
snoRNA	RF00324	ENSDARG00000104104	2460.65	2667.97	2883	-0.22853	-0.111829
snoRNA	RF00211	ENSDARG00000117016	1651.16	1574.94	1938	-0.231091	-0.299272
snoRNA	RF00133	ENSDARG00000081926	2579.66	2948.21	3030	-0.232134	-0.0394787
snoRNA	RF00324	ENSDARG00000100318	2334.14	2512.57	2748	-0.235494	-0.129218
snoRNA	RF00069	ENSDARG00000116248	3455.64	3486.87	4074	-0.237495	-0.224515
snoRNA	RF00324	ENSDARG00000102909	1681.18	1810.66	1984	-0.238939	-0.131899
snoRNA	RF00151	ENSDARG00000081849	2189.39	2429.63	2585	-0.239634	-0.0894264
snoRNA	RF00413	ENSDARG00000080351	477.12	500.244	570	-0.25661	-0.18833
snoRNA	RF00068	ENSDARG00000082960	2330.92	2272.49	2793	-0.260917	-0.297543
snoRNA	RF00566	ENSDARG00000080450	1557.88	1750.42	1868	-0.261913	-0.0937953
snoRNA	RF00068	ENSDARG00000082607	1040.01	1181.2	1254	-0.269934	-0.0862786
snoRNA	RF01848	ENSDARG00000113731	92.2075	111.747	112	-0.280543	-0.003258
snoRNA	RF00012	ENSDARG00000115569	92.2075	111.747	112	-0.280543	-0.003258
snoRNA	RF00577	ENSDARG00000081621	1875.24	1909.31	2287	-0.286379	-0.260406
snoRNA	RF00273	ENSDARG00000082833	874.899	1065.09	1094	-0.322425	-0.0386347
snoRNA	RF00273	ENSDARG00000081030	1447.44	1827.24	1815	-0.326463	0.00969969
snoRNA	RF00600	ENSDARG00000104420	251.962	342.226	316	-0.326717	0.115026
snoRNA	RF00430	ENSDARG00000083593	1937.43	2010.58	2447	-0.336871	-0.283403
snoRNA	RF01277	ENSDARG00000083158	2107.91	2165.11	2666	-0.338866	-0.30024
snoRNA	RF01848	ENSDARG00000113902	347.386	476.672	446	-0.360503	0.0959542
snoRNA	RF00012	ENSDARG00000115495	347.386	476.672	446	-0.360503	0.0959542
snoRNA	RF01848	ENSDARG00000110604	5400.57	5830.94	6965	-0.367012	-0.256394
snoRNA	RF00012	ENSDARG00000112042	5400.57	5830.94	6965	-0.367012	-0.256394
snoRNA	RF00012	ENSDARG00000109939	24.6601	26.1908	32	-0.375891	-0.289012
snoRNA	RF00593	ENSDARG00000083950	2260.16	2358.04	3059	-0.436638	-0.37547
snoRNA	RF00089	ENSDARG00000080531	101.857	105.636	138	-0.438122	-0.385564
snoRNA	RF00012	ENSDARG00000112804	27.8767	54.1276	39	-0.484416	0.472891
snoRNA	RF00012	ENSDARG00000110937	63.2586	70.7151	89	-0.492543	-0.331787
snoRNA	RF00152	ENSDARG00000083254	56.8255	43.6513	80	-0.493461	-0.873975
snoRNA	RF00494	ENSDARG00000113271	206.931	215.637	292	-0.496821	-0.43736
snoRNA	RF00150	ENSDARG00000082891	67.5473	103.017	104	-0.622613	-0.0136997
snoRNA	RF00012	ENSDARG00000116958	17.1549	32.302	27	-0.654341	0.258663
snoRNA	RF00415	ENSDARG00000104662	166.188	254.924	283	-0.767987	-0.150737
snoRNA	RF00281	ENSDARG00000087030	47.1759	55.8737	82	-0.797573	-0.553455
snoRNA	RF00012	ENSDARG00000116147	30.021	31.4289	53	-0.820019	-0.753899
snoRNA	RF00334	ENSDARG00000113464	19.2992	68.096	38	-0.977456	0.841572
snoRNA	RF01848	ENSDARG00000117129	4.28872	6.98421	13	-1.59989	-0.896343
snoRNA	RF00154	ENSDARG00000084148	2.14436	13.9684	12	-2.48442	0.219134
snRNA	RF00026	ENSDARG00000084431	71.8361	68.096	0	#DIV/0!	#DIV/0!
snRNA	RF00003	ENSDARG00000111055	19.2992	12.2224	0	#DIV/0!	#DIV/0!
snRNA	RF00026	ENSDARG00000111180	41.815	33.175	0	#DIV/0!	#DIV/0!
snRNA	RF00026	ENSDARG00000111324	42.8872	33.175	0	#DIV/0!	#DIV/0!
snRNA	RF00026	ENSDARG00000112565	41.815	33.175	0	#DIV/0!	#DIV/0!
snRNA	RF00026	ENSDARG00000113401	41.815	33.175	0	#DIV/0!	#DIV/0!
snRNA	RF00026	ENSDARG00000114693	41.815	33.175	0	#DIV/0!	#DIV/0!
snRNA	RF00026	ENSDARG00000117183	41.815	33.175	0	#DIV/0!	#DIV/0!
snRNA	RF00003	ENSDARG00000080512	33.2376	18.3336	1	5.05474	4.19641
snRNA	RF00026	ENSDARG00000113672	43.9594	44.5243	2	4.4581	4.47652
snRNA	RF00003	ENSDARG00000117184	28.9489	16.5875	2	3.85543	3.05202
snRNA	RF00003	ENSDARG00000112577	19.2992	13.9684	2	3.27047	2.8041
snRNA	RF00003	ENSDARG00000082646	23.588	13.9684	3	2.97502	2.21913
snRNA	RF00026	ENSDARG00000109221	31.0932	27.9368	5	2.6366	2.48217
snRNA	RF00026	ENSDARG00000110080	31.0932	25.3178	5	2.6366	2.34015
snRNA	RF00026	ENSDARG00000110916	31.0932	25.3178	5	2.6366	2.34015
snRNA	RF00026	ENSDARG00000111187	31.0932	25.3178	5	2.6366	2.34015
snRNA	RF00026	ENSDARG00000112639	31.0932	25.3178	5	2.6366	2.34015
snRNA	RF00026	ENSDARG00000113432	31.0932	25.3178	5	2.6366	2.34015
snRNA	RF00026	ENSDARG00000113683	31.0932	25.3178	5	2.6366	2.34015
snRNA	RF00026	ENSDARG00000115434	31.0932	25.3178	5	2.6366	2.34015
snRNA	RF00026	ENSDARG00000116360	31.0932	25.3178	5	2.6366	2.34015
snRNA	RF00003	ENSDARG00000104616	65.403	51.5085	11	2.57185	2.22731
snRNA	RF00003	ENSDARG00000109330	35.3819	17.4605	6	2.55998	1.54106
snRNA	RF00003	ENSDARG00000100931	26.8045	19.2066	6	2.15944	1.67857
snRNA	RF00003	ENSDARG00000114193	151.177	133.573	35	2.11082	1.9322
snRNA	RF00003	ENSDARG00000116620	16.0827	19.2066	4	2.00744	2.26353
snRNA	RF00003	ENSDARG00000110271	48.2481	34.048	14	1.78505	1.28214
snRNA	RF00003	ENSDARG00000081574	189.776	52.3816	57	1.73526	-0.121902
snRNA	RF00003	ENSDARG00000080787	47.1759	32.302	15	1.65309	1.10666
snRNA	RF00003	ENSDARG00000112430	21.4436	12.2224	8	1.42248	0.611452
snRNA	RF00003	ENSDARG00000113412	21.4436	12.2224	8	1.42248	0.611452
snRNA	RF00003	ENSDARG00000110665	23.588	19.2066	9	1.39005	1.0936
snRNA	RF00003	ENSDARG00000117166	24.6601	20.0796	10	1.30218	1.00573
snRNA	RF00003	ENSDARG00000091486	171.549	98.652	72	1.25255	0.454351
snRNA	RF00003	ENSDARG00000115069	13.9383	13.9684	6	1.21602	1.21913
snRNA	RF00003	ENSDARG00000114557	87.9188	48.0164	38	1.21017	0.337529
snRNA	RF00003	ENSDARG00000113698	36.4541	43.6513	16	1.18801	1.44795
snRNA	RF00003	ENSDARG00000112871	21.4436	13.0954	10	1.10055	0.389059
snRNA	RF00003	ENSDARG00000111444	30.021	27.0638	15	1.00101	0.851403
snRNA	RF00026	ENSDARG00000085400	60.0421	3.4921	34	0.820439	-3.28337
snRNA	RF00003	ENSDARG00000115443	19.2992	16.5875	11	0.81104	0.592593
snRNA	RF00026	ENSDARG00000104896	13.9383	22.6987	8	0.800987	1.50454
snRNA	RF00004	ENSDARG00000115186	3806.24	2390.35	2249	0.759082	0.0879357
snRNA	RF00004	ENSDARG00000082734	1376.68	937.63	816	0.754551	0.20045
snRNA	RF00004	ENSDARG00000081431	692.628	469.688	417	0.732034	0.171656
snRNA	RF00003	ENSDARG00000098775	241.24	166.748	148	0.704875	0.172072
snRNA	RF00026	ENSDARG00000102779	16.0827	9.60329	10	0.685509	-0.0583996
snRNA	RF00003	ENSDARG00000111255	16.0827	13.0954	10	0.685509	0.389059
snRNA	RF00003	ENSDARG00000111764	429.944	289.845	268	0.681916	0.113047
snRNA	RF00004	ENSDARG00000111709	1092.55	721.12	686	0.671421	0.0720301
snRNA	RF00003	ENSDARG00000113984	240.168	170.24	152	0.659974	0.1635
snRNA	RF00003	ENSDARG00000116034	422.439	289.845	271	0.64045	0.0969873
snRNA	RF00003	ENSDARG00000116887	13.9383	10.4763	9	0.631062	0.219134
snRNA	RF00003	ENSDARG00000109780	43.9594	27.0638	29	0.600118	-0.0996878
snRNA	RF00003	ENSDARG00000114009	219.797	155.399	145	0.600118	0.0999213
snRNA	RF00003	ENSDARG00000109323	366.686	298.575	242	0.599536	0.303086
snRNA	RF00618	ENSDARG00000115531	1241.58	943.741	840	0.563721	0.168002
snRNA	RF00003	ENSDARG00000113445	139713	49021.3	95525	0.548511	-0.96247
snRNA	RF00003	ENSDARG00000102390	17.1549	30.5559	12	0.515584	1.34842
snRNA	RF00003	ENSDARG00000115944	12.8662	10.4763	9	0.515584	0.219134
snRNA	RF00003	ENSDARG00000111938	39.6707	36.6671	28	0.502645	0.389059
snRNA	RF00003	ENSDARG00000080902	15.0105	4.36513	11	0.44847	-1.33341
snRNA	RF00003	ENSDARG00000101489	21.4436	19.2066	16	0.422475	0.263529
snRNA	RF00003	ENSDARG00000110891	32.1654	30.5559	24	0.422475	0.348417
snRNA	RF00020	ENSDARG00000085332	33.2376	24.4447	25	0.410887	-0.0324043
snRNA	RF00003	ENSDARG00000109985	33.2376	20.9526	25	0.410887	-0.254797
snRNA	RF00026	ENSDARG00000098956	111.507	90.7947	88	0.341555	0.045105
snRNA	RF00003	ENSDARG00000082628	262.684	167.621	214	0.295718	-0.352408
snRNA	RF00004	ENSDARG00000117035	10716.4	6687.38	8743	0.293625	-0.386687
snRNA	RF00020	ENSDARG00000109284	254.107	221.749	209	0.281931	0.0854225
snRNA	RF00003	ENSDARG00000111178	65.403	54.1276	55	0.249925	-0.0230665
snRNA	RF00003	ENSDARG00000113119	68.6195	55.0007	58	0.242566	-0.0766041
snRNA	RF00003	ENSDARG00000111111	11.794	5.23816	10	0.23805	-0.932869
snRNA	RF00003	ENSDARG00000113020	11.794	5.23816	10	0.23805	-0.932869
snRNA	RF00003	ENSDARG00000114570	11.794	5.23816	10	0.23805	-0.932869
snRNA	RF00003	ENSDARG00000115879	11.794	5.23816	10	0.23805	-0.932869
snRNA	RF00003	ENSDARG00000116816	11.794	5.23816	10	0.23805	-0.932869
snRNA	RF00003	ENSDARG00000117022	11.794	5.23816	10	0.23805	-0.932869
snRNA	RF00020	ENSDARG00000115851	610.07	449.609	518	0.236024	-0.204283
snRNA	RF00003	ENSDARG00000101834	24.6601	4.36513	21	0.231792	-2.26629
snRNA	RF00548	ENSDARG00000080410	204.786	187.701	177	0.21037	0.0846842
snRNA	RF00026	ENSDARG00000082005	66.4752	62.8579	58	0.196762	0.116041
snRNA	RF00619	ENSDARG00000080562	117.94	70.7151	104	0.181467	-0.556493
snRNA	RF00007	ENSDARG00000080745	1588.97	1253.67	1402	0.180606	-0.161334
snRNA	RF00003	ENSDARG00000114277	21.4436	14.8414	19	0.174548	-0.356368
snRNA	RF00003	ENSDARG00000110070	60.0421	56.7467	54	0.153014	0.0715772
snRNA	RF00026	ENSDARG00000080129	46.1037	55.0007	43	0.100547	0.355112
snRNA	RF00026	ENSDARG00000102220	15.0105	10.4763	14	0.100547	-0.418295
snRNA	RF00020	ENSDARG00000082842	287.344	232.225	269	0.0951738	-0.212083
snRNA	RF00003	ENSDARG00000116616	652.958	572.705	615	0.0864028	-0.102794
snRNA	RF00003	ENSDARG00000103784	656.174	408.576	620	0.0818104	-0.601663
snRNA	RF00026	ENSDARG00000091605	69.6917	66.35	66	0.0785207	0.00763032
snRNA	RF00026	ENSDARG00000083520	67.5473	75.0803	64	0.0778269	0.230362
snRNA	RF00003	ENSDARG00000111972	474.976	291.591	452	0.0715309	-0.632378
snRNA	RF00066	ENSDARG00000081015	411.717	403.338	397	0.0525143	0.0228508
snRNA	RF00066	ENSDARG00000083638	408.501	398.973	395	0.0484853	0.0144384
snRNA	RF00015	ENSDARG00000113699	556.461	537.784	541	0.0406529	-0.00860132
snRNA	RF00066	ENSDARG00000082384	411.717	401.592	401	0.038051	0.00212855
snRNA	RF00020	ENSDARG00000081192	260.54	247.066	255	0.031006	-0.0455983
snRNA	RF00003	ENSDARG00000109432	18.2271	17.4605	18	0.0180848	-0.0439
snRNA	RF00003	ENSDARG00000109433	410845	386507	407075	0.013301	-0.0747999
snRNA	RF00003	ENSDARG00000110859	615152	578935	611296	0.00907295	-0.0784694
snRNA	RF00015	ENSDARG00000083431	23915	21711.3	24247	-0.0198921	-0.159361
snRNA	RF00003	ENSDARG00000114494	232775	151192	236668	-0.0239314	-0.646487
snRNA	RF00003	ENSDARG00000101401	11.794	27.9368	12	-0.0249839	1.21913
snRNA	RF00015	ENSDARG00000112858	4733.67	4303.15	4821	-0.026372	-0.163941
snRNA	RF00003	ENSDARG00000115441	56.8255	58.4928	58	-0.0295136	0.0122051
snRNA	RF00004	ENSDARG00000115204	24376	20677.6	25068	-0.0403849	-0.277776
snRNA	RF00004	ENSDARG00000110399	41327.2	36934.2	42575	-0.0429158	-0.205047
snRNA	RF00003	ENSDARG00000116336	30.021	32.302	31	-0.0462944	0.059354
snRNA	RF00003	ENSDARG00000083063	12869.4	10634.3	13636	-0.0834785	-0.358691
snRNA	RF00003	ENSDARG00000091552	15.0105	11.3493	16	-0.0920981	-0.495463
snRNA	RF00020	ENSDARG00000111816	13.9383	22.6987	16	-0.199013	0.504537
snRNA	RF00004	ENSDARG00000082321	13921.2	13441.1	16473	-0.242821	-0.293451
snRNA	RF00026	ENSDARG00000082473	11.794	20.0796	14	-0.247376	0.520304
snRNA	RF00003	ENSDARG00000104948	71.8361	64.6039	87	-0.276307	-0.429393
snRNA	RF00003	ENSDARG00000102676	35.3819	28.8099	43	-0.281324	-0.577774
snRNA	RF00015	ENSDARG00000082871	52.5368	3.4921	64	-0.284743	-4.1959
snRNA	RF00003	ENSDARG00000115792	9.64962	4.36513	12	-0.314491	-1.45894
snRNA	RF00003	ENSDARG00000116679	19.2992	16.5875	24	-0.314491	-0.532938
snRNA	RF00020	ENSDARG00000081029	66.4752	105.636	83	-0.320296	0.347921
snRNA	RF00003	ENSDARG00000098590	70.7639	64.6039	95	-0.424915	-0.556305
snRNA	RF00003	ENSDARG00000116756	11.794	0.873026	16	-0.440021	-4.1959
snRNA	RF00003	ENSDARG00000082790	13.9383	45.3974	19	-0.446941	1.25661
snRNA	RF00548	ENSDARG00000083417	28.9489	31.4289	40	-0.466494	-0.347906
snRNA	RF00003	ENSDARG00000114186	8.57744	5.23816	12	-0.484416	-1.1959
snRNA	RF00026	ENSDARG00000112158	11.794	8.73026	17	-0.527484	-0.961438
snRNA	RF00026	ENSDARG00000112350	11.794	8.73026	17	-0.527484	-0.961438
snRNA	RF00026	ENSDARG00000112813	11.794	8.73026	17	-0.527484	-0.961438
snRNA	RF00026	ENSDARG00000113908	11.794	9.60329	17	-0.527484	-0.823934
snRNA	RF00618	ENSDARG00000084894	7.50526	6.11118	11	-0.55153	-0.84798
snRNA	RF00003	ENSDARG00000115827	15.0105	6.11118	22	-0.55153	-1.84798
snRNA	RF00026	ENSDARG00000115210	12.8662	12.2224	19	-0.562418	-0.636476
snRNA	RF00003	ENSDARG00000114972	15.0105	9.60329	23	-0.61566	-1.26003
snRNA	RF00004	ENSDARG00000113972	6.43308	16.5875	10	-0.636419	0.730096
snRNA	RF00026	ENSDARG00000110692	11.794	12.2224	19	-0.687949	-0.636476
snRNA	RF00026	ENSDARG00000111674	11.794	12.2224	19	-0.687949	-0.636476
snRNA	RF00026	ENSDARG00000112814	11.794	12.2224	19	-0.687949	-0.636476
snRNA	RF00026	ENSDARG00000112939	11.794	12.2224	19	-0.687949	-0.636476
snRNA	RF00026	ENSDARG00000113283	11.794	12.2224	19	-0.687949	-0.636476
snRNA	RF00026	ENSDARG00000113435	11.794	12.2224	19	-0.687949	-0.636476
snRNA	RF00026	ENSDARG00000113523	11.794	12.2224	19	-0.687949	-0.636476
snRNA	RF00026	ENSDARG00000113861	11.794	12.2224	19	-0.687949	-0.636476
snRNA	RF00026	ENSDARG00000113996	11.794	12.2224	19	-0.687949	-0.636476
snRNA	RF00026	ENSDARG00000114896	11.794	12.2224	19	-0.687949	-0.636476
snRNA	RF00026	ENSDARG00000115261	11.794	12.2224	19	-0.687949	-0.636476
snRNA	RF00026	ENSDARG00000116425	11.794	12.2224	19	-0.687949	-0.636476
snRNA	RF00003	ENSDARG00000115802	5.3609	13.0954	10	-0.899453	0.389059
snRNA	RF00003	ENSDARG00000112603	9.64962	15.7145	22	-1.18896	-0.48541
snRNA	RF00003	ENSDARG00000109896	5.3609	6.98421	13	-1.27796	-0.896343
snRNA	RF00003	ENSDARG00000112345	5.3609	6.11118	13	-1.27796	-1.08899
snRNA	RF00003	ENSDARG00000117081	5.3609	5.23816	13	-1.27796	-1.31138
snRNA	RF00003	ENSDARG00000111851	8.57744	13.9684	22	-1.35888	-0.655335
snRNA	RF00026	ENSDARG00000115391	4.28872	12.2224	11	-1.35888	0.15202
snRNA	RF00003	ENSDARG00000111563	9.64962	20.9526	25	-1.37338	-0.254797
snRNA	RF00003	ENSDARG00000113844	4.28872	2.61908	12	-1.48442	-2.1959
snRNA	RF00026	ENSDARG00000111930	3.21654	10.4763	10	-1.63642	0.0671313
snRNA	RF00026	ENSDARG00000115765	3.21654	9.60329	10	-1.63642	-0.0583996
snRNA	RF00026	ENSDARG00000110188	3.21654	9.60329	11	-1.77392	-0.195903
snRNA	RF00026	ENSDARG00000099467	3.21654	9.60329	12	-1.89945	-0.321434
snRNA	RF00026	ENSDARG00000108420	3.21654	9.60329	13	-2.01493	-0.436911
snRNA	RF00026	ENSDARG00000109917	3.21654	9.60329	13	-2.01493	-0.436911
snRNA	RF00026	ENSDARG00000112905	5.3609	3.4921	22	-2.03696	-2.65533
snRNA	RF00026	ENSDARG00000113981	3.21654	9.60329	14	-2.12185	-0.543826
snRNA	RF00026	ENSDARG00000101714	1.07218	7.85724	12	-3.48442	-0.610941
snRNA	RF00026	ENSDARG00000112330	1.07218	6.11118	12	-3.48442	-0.973511
snRNA	RF00026	ENSDARG00000113298	1.07218	6.11118	12	-3.48442	-0.973511
snRNA	RF00026	ENSDARG00000116338	1.07218	6.98421	12	-3.48442	-0.780866
snRNA	RF00026	ENSDARG00000116954	1.07218	6.98421	12	-3.48442	-0.780866
snRNA	RF00004	ENSDARG00000080774	2.14436	330.004	60	-4.80634	2.45945
snRNA	RF00026	ENSDARG00000111566	0	11.3493	14	-5	-0.302818
[truncated: 1,202 more rows]
