# Supplementary material for: RNA exosome mutations in pontocerebellar hypoplasia alter ribosome biogenesis and p53 levels
Source: Life Sci Alliance. 2020 Jun 11;3(8):e202000678. doi: 10.26508/lsa.202000678 (PMC7295610; doi:10.26508/lsa.202000678)
Supplement: Supplementary file 7 [file LSA-2020-00678_TableS6.xlsx]

## Sheet: SuppTab6 - iNPC DESeq2
Row.names	Symbol	Name	GO	OMIM	F008-NPC-1	F008-NPC-2	F008-NPC-3	F152-A	F152-B	F152-C	F153-NPC-1	F153-NPC-2	F153-NPC-3	F153-NPC3-rep	EXOSC3-NPC-1	EXOSC3-NPC-2	EXOSC3-NPC-3	EXOSC8-NPC1	EXOSC8-NPC2	EXOSC8-NPC3	EXOSC9-NPC-1	EXOSC9-NPC-2	EXOSC9-NPC-3	EXOSC3-log2	lfcSE	padj	EXOSC8-log2	lfcSE	padj	EXOSC9-log2	lfcSE	padj	EXOSC389	lfcSE	padj
ENSG00000240583	AQP1	aquaporin 1 (Colton blood group)	Enables the transmembrane transfer of a cation by a channel that opens when intracellular cGMP has been bound by the channel complex or one of its constituent parts. [GOC:mtg_transport];"The directed movement of carbon dioxide (CO2) into, out of or within a cell, or between cells, by means of some agent such as a transporter or pore." [GOC:ai];"Any cellular process that results in the specificati…	cell volume homeostasis;establishment or maintenance of actin cytoskeleton polarity;negative regulation of cysteine-type endopeptidase activity involved in apoptotic process;BLOOD GROUP--COLTON;water channel activity;positive regulation of angiogenesis;delayed rectifier potassium channel activity;cellular hyperosmotic response;water transport;maintenance of symbiont-containing vacuole by host;pos…	30	17	24	5	9	12	16	16	20	9	18	21	24	610	457	625	19	20	19	-0.183857	0.3491	0.745004	4.91069	0.23673	5.50461e-92	-0.739295	0.339676	0.113665	2.74736	0.589395	0.000147855
ENSG00000143869	GDF7	growth differentiation factor 7	Any process that activates or increases the frequency, rate or extent of cellular DNA-templated transcription. [GOC:go_curators, GOC:txnOH];"The space external to the outermost structure of a cell. For cells without external protective or external encapsulating structures this refers to space outside of the plasma membrane. This term covers the host cell environment outside an intracellular paras…	.	193	211	139	69	50	159	130	118	153	77	71	74	106	3338	2965	3313	16671	17658	16677	-1.21453	0.186137	7.93975e-09	4.44888	0.12688	5.71861e-265	5.95852	0.118541	0	4.02138	0.546379	9.94095e-11
ENSG00000167528	ZNF641	zinc finger protein 641	Any molecular function by which a gene product interacts selectively and non-covalently with DNA (deoxyribonucleic acid). [GOC:dph, GOC:jl, GOC:tb, GOC:vw];"The cellular synthesis of RNA on a template of DNA." [GOC:jl, GOC:txnOH];"That part of the nuclear content other than the chromosomes or the nucleolus." [GOC:ma, ISBN:0124325653];"A membrane-bounded organelle of eukaryotic cells in which chro…	.	491	606	538	143	134	378	410	315	396	266	506	519	556	5083	3972	4483	592	682	652	-0.0585857	0.127579	0.779386	3.46217	0.124861	2.517e-165	-0.224755	0.127603	0.215913	1.8727	0.465753	0.00141763
ENSG00000115295	CLIP4	CAP-Gly domain containing linker protein family member 4	Interacting selectively and non-covalently with any protein or protein complex (a complex of two or more proteins that may include other nonprotein molecules). [GOC:go_curators]	.	275	283	298	74	50	135	113	116	140	114	321	335	296	2017	1494	1899	286	285	320	0.43067	0.238322	0.215628	3.32895	0.235129	1.36236e-42	-0.102981	0.24205	0.791848	1.87448	0.442233	0.000683606
ENSG00000138821	SLC39A8	solute carrier family 39 member 8	Enables the transfer of zinc (Zn) ions from one side of a membrane to the other. [GOC:dgf];"The membrane surrounding a cell that separates the cell from its external environment. It consists of a phospholipid bilayer and associated proteins." [ISBN:0716731363];"The directed movement of zinc (Zn II) ions into, out of or within a cell, or between cells, by means of some agent such as a transporter …	zinc II ion transport;CONGENITAL DISORDER OF GLYCOSYLATION TYPE IIn;Intellectual Disability with Cerebellar Atrophy	580	564	559	315	217	656	776	629	732	528	736	813	813	7543	5146	7221	978	1000	854	-0.157192	0.212276	0.650772	3.30426	0.21434	1.51516e-50	-0.346604	0.208714	0.247719	1.75204	0.468103	0.00336951
ENSG00000119900	OGFRL1	opioid growth factor receptor like 1	Combining with an extracellular or intracellular messenger to initiate a change in cell activity. [GOC:ceb, ISBN:0198506732];"A lipid bilayer along with all the proteins and protein complexes embedded in it an attached to it." [GOC:dos, GOC:mah, ISBN:0815316194]	.	1127	1415	1123	828	493	974	1018	802	959	698	1458	1541	1333	11910	8476	11606	647	716	629	-0.0769232	0.201772	0.818367	3.20158	0.204085	2.29729e-52	-1.63114	0.197257	2.06675e-14	1.57937	0.505181	0.018033
ENSG00000143153	ATP1B1	ATPase Na+/K+ transporting subunit beta 1	Catalysis of the transfer of a solute or solutes from one side of a membrane to the other according to the reaction: ATP + H2O + Na+(in) + K+(out) = ADP + phosphate + Na+(out) + K+(in). [EC:3.6.3.9];"Any process that activates or increases the frequency, rate or extent of calcium:sodium antiporter activity." [GO_REF:0000059, GOC:BHF, GOC:mtg_cardiac_conduct_nov11, GOC:rl, GOC:TermGenie, PMID:1968…	positive regulation of defense response to virus by host;HYPERTENSION ESSENTIAL SUSCEPTIBILITY TO	1305	1533	1315	618	318	1264	1335	965	1160	886	1992	2081	2420	11979	8722	11427	3473	3718	3285	0.410153	0.110685	0.00305601	3.14259	0.107412	4.29535e-184	0.647374	0.0956584	9.99338e-10	1.83503	0.375304	5.63334e-05
ENSG00000204262	COL5A2	collagen type V alpha 2 chain	A collagen heterotrimer containing type V alpha chains; [alpha1(V)]2alpha2(V) and alpha1(V)alpha2(V)alpha3(V) trimers have been observed; type V collagen triple helices associate to form fibrils. [ISBN:0721639976];"The space external to the outermost structure of a cell. For cells without external protective or external encapsulating structures this refers to space outside of the plasma membrane.…	skin development;Ehlers-Danlos syndrome type 1;camera-type eye morphogenesis;Ehlers-Danlos syndrome classic type;collagen fibril organization;collagen type V trimer;Ehlers-Danlos syndrome type 2	5803	6005	5670	3241	1775	7692	8468	7189	8187	5651	14624	16197	18479	74158	49111	63962	37187	35828	35176	0.801012	0.239097	0.00869631	3.12539	0.242545	3.12757e-35	1.47859	0.235419	2.07219e-08	2.06808	0.327699	5.31232e-08
ENSG00000134871	COL4A2	collagen type IV alpha 2 chain	The cellular synthesis of RNA on a template of DNA. [GOC:jl, GOC:txnOH];"Any process that stops, prevents, or reduces the frequency, rate or extent of angiogenesis." [GOC:go_curators];"The space external to the outermost structure of a cell. For cells without external protective or external encapsulating structures this refers to space outside of the plasma membrane. This term covers the host cel…	HEMORRHAGE INTRACEREBRAL SUSCEPTIBILITY TO;Familial porencephaly;Porencephaly 2	5296	5405	5043	2402	1198	7852	6705	4861	5561	4086	7979	6454	6339	55737	38209	49633	13476	12575	11213	-0.0800182	0.215282	0.822787	3.1008	0.215903	8.17371e-44	0.304871	0.211198	0.328225	1.7052	0.42109	0.00129036
ENSG00000164023	SGMS2	sphingomyelin synthase 2	The chemical reactions and pathways resulting in the formation of sphingomyelin, N-acyl-4-sphingenyl-1-O-phosphorylcholine. [ISBN:0198506732];"The membrane surrounding a cell that separates the cell from its external environment. It consists of a phospholipid bilayer and associated proteins." [ISBN:0716731363];"Catalysis of the transfer of a phosphate group, usually from ATP, to a substrate molec…	.	148	183	155	89	56	129	152	132	135	120	231	215	208	1436	991	1305	327	323	320	0.0993291	0.160176	0.697293	3.02529	0.15449	7.38794e-82	0.219188	0.145373	0.302814	1.63391	0.407157	0.00145672
ENSG00000049323	LTBP1	latent transforming growth factor beta binding protein 1	Interacting selectively and non-covalently with calcium ions (Ca2+). [GOC:ai];"Interacting selectively and non-covalently with TGF-beta, transforming growth factor beta, a multifunctional peptide that controls proliferation, differentiation and other functions in many cell types." [ISBN:0198506732];"Extracellular matrix components occurring independently or along with elastin. Thought to have for…	.	1813	1998	1846	791	473	2124	2019	1841	2034	1203	2645	2864	3056	14993	10722	12994	2498	2545	2587	0.217589	0.160536	0.373492	2.81042	0.162826	1.84931e-63	-0.394653	0.157318	0.0618253	1.45649	0.408163	0.00574193
ENSG00000113441	LNPEP	leucyl and cystinyl aminopeptidase	The living contents of a cell; the matter contained within (but not including) the plasma membrane, usually taken to exclude large vacuoles and masses of secretory or ingested material. In eukaryotes it includes the nucleus and cytoplasm. [ISBN:0198506732];"The cascade of processes by which a signal interacts with a receptor, causing a change in the activity of a SMAD protein, and ultimately effe…	.	2016	2384	2241	600	447	1259	1190	933	1172	920	2038	1993	1960	10658	8054	9986	4030	4656	4016	0.0456953	0.174753	0.877952	2.71679	0.179883	1.59301e-48	0.671172	0.176832	0.00200193	1.52961	0.356931	0.000576066
ENSG00000173705	SUSD5	sushi domain containing 5	The component of a membrane consisting of the gene products and protein complexes having at least some part of their peptide sequence embedded in the hydrophobic region of the membrane. [GOC:dos, GOC:go_curators];"The attachment of a cell, either to another cell or to an underlying substrate such as the extracellular matrix, via cell adhesion molecules." [GOC:hb, GOC:pf];"A series of molecular si…	.	134	143	154	61	42	106	184	144	147	101	97	83	102	939	727	953	104	113	112	-0.977028	0.216075	0.000169581	2.62849	0.190807	2.73139e-40	-1.20873	0.206625	2.36807e-07	1.1088	0.482163	0.0971015
ENSG00000233237	LINC00472	.	.	.	95	88	70	33	46	71	58	53	55	37	98	76	89	437	421	454	3086	3164	3181	-0.124495	0.254379	0.764851	2.60368	0.222331	3.96864e-29	4.545	0.198959	6.64341e-112	2.945	0.471103	7.47535e-08
ENSG00000121361	KCNJ8	potassium voltage-gated channel subfamily J member 8	The directed movement of potassium ions (K+) into, out of or within a cell, or between cells, by means of some agent such as a transporter or pore. [GOC:ai];"An increase in the internal diameter of blood vessels, especially arterioles or capillaries, usually resulting in a decrease in blood pressure." [ISBN:0192800981];"Enables the transmembrane transfer of a potassium ion by an inwardly-rectifyi…	BRUGADA SYNDROME;Hypertrichotic osteochondrodysplasia Cantu type	73	86	68	52	27	85	59	43	66	30	67	67	67	453	390	409	68	38	63	-0.441234	0.240746	0.208561	2.59948	0.20896	7.82059e-33	-1.12802	0.268714	0.000477228	1.12629	0.466407	0.0794825
ENSG00000122786	CALD1	caldesmon 1	A process in which force is generated within muscle tissue, resulting in a change in muscle geometry. Force generation involves a chemo-mechanical energy conversion step that is carried out by the actin/myosin complex activity, which generates force through ATP hydrolysis. [GOC:ef, GOC:mtg_muscle, ISBN:0198506732];"The membrane surrounding a cell that separates the cell from its external environm…	.	2374	2741	2536	881	564	1866	2090	1643	2062	1468	2063	2031	1892	13222	10478	13127	3561	3542	3256	-0.455605	0.0974043	8.94774e-05	2.59306	0.0988807	8.34896e-148	-0.118603	0.0939707	0.40093	1.25104	0.400944	0.0183069
ENSG00000162493	PDPN	podoplanin	Any process involved in the controlled self-propelled movement of a cell that results in translocation of the cell from one place to another. [GOC:dgh, GOC:dph, GOC:isa_complete, GOC:mlg];"The cellular process in which a signal is conveyed to trigger a change in the activity or state of a cell. Signal transduction begins with reception of a signal (e.g. a ligand binding to a receptor or receptor …	.	2165	2350	2274	537	321	1493	1233	1141	1097	713	2277	2283	2389	9222	7667	8751	1149	1020	1076	0.283305	0.205889	0.365318	2.57867	0.209222	3.02736e-32	-1.24599	0.211557	1.89402e-07	1.23653	0.433515	0.0335233
ENSG00000151135	TMEM263	transmembrane protein 263	The component of a membrane consisting of the gene products and protein complexes having at least some part of their peptide sequence embedded in the hydrophobic region of the membrane. [GOC:dos, GOC:go_curators]	.	600	687	559	412	275	643	752	540	790	582	982	1031	984	4458	3372	4488	2477	2626	2396	0.0774265	0.219487	0.832175	2.51816	0.220625	1.17478e-27	0.938964	0.214363	0.000239199	1.47194	0.329629	0.000303521
ENSG00000163710	PCOLCE2	procollagen C-endopeptidase enhancer 2	Any process that increases the frequency, rate or extent of peptidase activity, the hydrolysis of peptide bonds within proteins. [GOC:dph, GOC:tb];"Interacting selectively and non-covalently with collagen, a group of fibrous proteins of very high tensile strength that form the main component of connective tissue in animals. Collagen is highly enriched in glycine (some regions are 33% glycine) and…	.	222	197	177	46	30	145	174	160	152	143	207	230	231	1007	762	943	173	160	154	0.0543419	0.229253	0.889728	2.47796	0.221062	1.08743e-26	-0.840592	0.231137	0.00335283	1.17474	0.419406	0.0371309
ENSG00000235162	C12orf75	chromosome 12 open reading frame 75	.	.	373	396	329	130	92	486	294	240	246	175	608	610	601	1866	1364	1914	365	367	354	0.547433	0.17154	0.0134227	2.46575	0.173709	8.36327e-43	-0.636556	0.171348	0.00262285	1.26594	0.378913	0.0105474
ENSG00000127920	GNG11	G protein subunit gamma 11	Any of a family of heterotrimeric GTP-binding and hydrolyzing proteins; they belong to a superfamily of GTPases that includes monomeric proteins such as EF-Tu and RAS. Heterotrimeric G-proteins consist of three subunits; the alpha subunit contains the guanine nucleotide binding site and possesses GTPase activity; the beta and gamma subunits are tightly associated and function as a beta-gamma hete…	.	130	161	102	59	25	102	121	69	82	65	222	251	244	602	489	610	866	919	866	0.786993	0.166227	7.03162e-05	2.46199	0.153644	1.28683e-54	2.21518	0.14291	4.80238e-51	1.94378	0.244623	1.56214e-12
ENSG00000182752	PAPPA	pappalysin 1	Catalysis of the hydrolysis of internal, alpha-peptide bonds in a polypeptide chain by a mechanism in which water acts as a nucleophile, one or two metal ions hold the water molecule in place, and charged amino acid side chains are ligands for the metal ions. [GOC:mah, http://merops.sanger.ac.uk/about/glossary.htm#CATTYPE, http://merops.sanger.ac.uk/about/glossary.htm#ENDOPEPTIDASE];"The chemical…	.	466	491	456	172	138	320	246	201	253	158	177	173	205	2018	1493	1728	389	432	400	-1.22701	0.208911	3.15175e-07	2.39914	0.200615	2.19361e-30	-0.556196	0.197974	0.0324965	0.986865	0.448623	0.114244
ENSG00000169902	TPST1	tyrosylprotein sulfotransferase 1	The component of a membrane consisting of the gene products and protein complexes having at least some part of their peptide sequence embedded in the hydrophobic region of the membrane. [GOC:dos, GOC:go_curators];"Catalysis of the reaction: 3'-phosphoadenosine 5'-phosphosulfate + protein tyrosine = adenosine 3',5'-bisphosphate + protein tyrosine-O-sulfate." [EC:2.8.2.20];"A compound membranous cy…	.	492	470	486	128	82	528	530	442	424	287	658	693	713	2498	1762	2408	1021	1086	986	0.269722	0.2186	0.42348	2.36686	0.221057	2.23664e-24	0.399929	0.217895	0.194036	1.31061	0.326807	0.00146921
ENSG00000246273	SBF2-AS1	.	.	.	92	89	102	33	26	80	122	103	109	85	130	125	116	529	380	574	115	115	126	-0.0647331	0.246549	0.877407	2.3265	0.237905	2.24629e-20	-0.565498	0.245414	0.0917285	1.07765	0.399623	0.0460499
ENSG00000107796	ACTA2	actin, alpha 2, smooth muscle, aorta	Any process that increases the frequency, rate or extent of gene expression. Gene expression is the process in which a gene's coding sequence is converted into a mature gene product or products (proteins or RNA). This includes the production of an RNA transcript as well as any processing to produce a mature RNA product or an mRNA (for protein-coding genes) and the translation of that mRNA into pr…	Moyamoya disease 5;AORTIC ANEURYSM FAMILIAL THORACIC 6;MULTISYSTEMIC SMOOTH MUSCLE DYSFUNCTION SYNDROME;Moyamoya disease;Familial thoracic aortic aneurysm and aortic dissection	441	489	499	204	123	554	503	618	666	392	225	269	313	2710	2314	2731	1384	1085	1225	-1.32432	0.250856	6.17232e-06	2.30745	0.23892	7.00782e-20	0.378263	0.244105	0.287269	1.06868	0.418627	0.0612878
ENSG00000067082	KLF6	.	.	GASTRIC CANCER GASTRIC CANCER INTESTINAL INCLUDED	598	727	604	197	149	459	526	413	469	332	690	687	603	2722	2180	2402	932	913	777	-0.0229167	0.105063	0.898892	2.29285	0.100569	2.24122e-111	-0.072501	0.0996171	0.645399	1.12418	0.346467	0.0134203
ENSG00000078295	ADCY2	adenylate cyclase 2	The living contents of a cell; the matter contained within (but not including) the plasma membrane, usually taken to exclude large vacuoles and masses of secretory or ingested material. In eukaryotes it includes the nucleus and cytoplasm. [ISBN:0198506732];"Any process that results in a change in state or activity of a cell (in terms of movement, secretion, enzyme production, gene expression, etc…	.	228	262	229	136	97	347	273	209	172	153	753	684	720	1123	1137	1142	9917	10612	10444	1.10445	0.19627	1.12998e-06	2.20259	0.195421	5.61504e-27	4.4729	0.184617	6.69942e-126	3.01731	0.406941	6.72805e-11
ENSG00000128791	TWSG1	twisted gastrulation BMP signaling modulator 1	The process whose specific outcome is the progression of the myeloid and lymphoid derived organ/tissue systems of the blood and other parts of the body over time, from formation to the mature structure. The site of hemopoiesis is variable during development, but occurs primarily in bone marrow or kidney in many adult vertebrates. [GOC:dgh, ISBN:0198506732];"The process in which the anatomical str…	.	1449	1670	1557	1026	594	1758	1589	1230	1356	991	2241	2634	2435	7658	5525	7758	3610	3867	3441	0.208833	0.16845	0.421028	2.14457	0.170283	1.19814e-33	0.336484	0.158603	0.124882	1.14371	0.298578	0.00257407
ENSG00000150630	VEGFC	.	.	Lymphedema hereditary id	54	64	57	13	14	36	45	62	51	33	145	164	162	214	181	250	138	151	127	1.24937	0.235765	5.58827e-06	2.13381	0.231824	4.59946e-18	0.633415	0.231637	0.0386356	1.44872	0.253735	1.2749e-06
ENSG00000149218	ENDOD1	endonuclease domain containing 1	Interacting selectively and non-covalently with any metal ion. [GOC:ai];"Catalysis of the hydrolysis of ester linkages within nucleic acids by creating internal breaks." [GOC:mah, ISBN:0198547684];"The nucleic acid metabolic process in which the phosphodiester bonds between nucleotides are cleaved by hydrolysis." [GOC:dph, GOC:tb];"Interacting selectively and non-covalently with any nucleic acid.…	.	869	996	902	364	224	561	770	664	643	448	727	775	886	3458	2549	3470	720	745	725	-0.292902	0.122409	0.0831621	2.11852	0.119635	8.59239e-67	-0.868056	0.111817	1.02371e-12	0.860965	0.386552	0.109441
ENSG00000167508	MVD	mevalonate diphosphate decarboxylase	The chemical reactions and pathways resulting in the formation of isopentenyl diphosphate, via the intermediate mevalonate. This pathway converts acetate, in the form of acetyl-CoA, to isopentenyl diphosphate (IPP), the fundamental unit in isoprenoid biosynthesis, through a series of mevalonate intermediates. [GOC:go_curators, MetaCyc:PWY-922];"Interacting selectively and non-covalently with Hsp7…	Disseminated superficial actinic porokeratosis;Porokeratosis 7 multiple types;positive regulation of cell proliferation	678	726	623	173	120	887	780	353	438	423	728	484	383	2594	2094	2766	2305	1975	1553	-0.493438	0.275167	0.21964	2.11467	0.248539	1.73438e-15	0.888556	0.255727	0.00555339	1.15496	0.343334	0.00999247
ENSG00000184164	CRELD2	cysteine rich with EGF like domains 2	Interacting selectively and non-covalently with calcium ions (Ca2+). [GOC:ai];"The irregular network of unit membranes, visible only by electron microscopy, that occurs in the cytoplasm of many eukaryotic cells. The membranes form a complex meshwork of tubular channels, which are often expanded into slitlike cavities called cisternae. The ER takes two forms, rough (or granular), with ribosomes ad…	.	422	430	385	119	79	496	386	261	300	228	295	259	251	1621	1282	1541	742	738	571	-0.759708	0.184865	0.000800644	2.11392	0.174524	3.77251e-31	0.122298	0.181001	0.663742	0.950093	0.367884	0.0577196
ENSG00000166130	IKBIP	IKBKB interacting protein	The component of a membrane consisting of the gene products and protein complexes having at least some part of their peptide sequence embedded in the hydrophobic region of the membrane. [GOC:dos, GOC:go_curators];"The irregular network of unit membranes, visible only by electron microscopy, that occurs in the cytoplasm of many eukaryotic cells. The membranes form a complex meshwork of tubular cha…	.	1047	1250	1068	802	425	1348	1298	874	1122	868	959	998	988	5639	4129	5690	2806	2865	2626	-0.707873	0.190409	0.00294433	2.08528	0.19277	7.10215e-25	0.322194	0.183574	0.217753	0.96959	0.355032	0.0428246
ENSG00000168646	AXIN2	axin 2	Prevention of degradation of mRNA molecules. In the absence of compensating changes in other processes, the slowing of mRNA degradation can result in an overall increase in the population of active mRNA molecules. [GOC:jid];"A cytoplasmic protein complex containing glycogen synthase kinase-3-beta (GSK-3-beta), the adenomatous polyposis coli protein (APC), and the scaffolding protein axin, among o…	negative regulation of cell proliferation;maintenance of DNA repeat elements;Oligodontia;Oligodontia-cancer predisposition syndrome syndrome;regulation of centromeric sister chromatid cohesion;negative regulation of catenin import into nucleus;odontogenesis;positive regulation of cell death;OLIGODONTIA-COLORECTAL CANCER SYNDROME;AXIN2-related attenuated familial adenomatous polyposis;regulation o…	455	499	518	222	96	503	349	237	269	232	324	270	321	1627	1474	1598	3774	3808	3499	-0.72129	0.181579	0.00127268	2.05484	0.171649	1.92321e-30	2.39587	0.165171	1.26556e-44	1.63907	0.362378	0.000247213
ENSG00000197702	PARVA	parvin alpha	The attachment of a cell to a cell of a different type via adhesion molecules. [GOC:add];"The attachment of a cell, either to another cell or to an underlying substrate such as the extracellular matrix, via cell adhesion molecules." [GOC:hb, GOC:pf];"A thin sheetlike process extended by the leading edge of a migrating cell or extending cell process; contains a dense meshwork of actin filaments." …	.	250	301	297	68	52	117	141	125	134	86	173	210	188	687	678	749	314	339	342	-0.254533	0.245002	0.510456	2.03697	0.238167	1.20959e-15	0.0870369	0.240354	0.826516	0.963332	0.343058	0.0367388
ENSG00000152684	PELO	pelota homolog (Drosophila)	The chemical reactions and pathways resulting in the breakdown of the transcript body of a nuclear-transcribed mRNA with stalls in translation elongation. [GOC:jp, PMID:16554824];"The set of processes involved in identifying and degrading defective or aberrant RNAs." [GOC:dgf, GOC:krc, PMID:18644474];"The progression of biochemical and morphological phases and events that occur in a cell during s…	.	468	480	472	154	91	434	636	517	565	337	522	555	616	2096	1579	2114	1091	1033	913	-0.134892	0.248145	0.736771	2.03427	0.247363	1.73657e-14	0.24615	0.247336	0.524041	1.01313	0.327283	0.0193907
ENSG00000165169	DYNLT3	dynein light chain Tctex-type 3	Interacting selectively and non-covalently with an identical protein or proteins. [GOC:jl];"The directed movement of substances (such as macromolecules, small molecules, ions) or cellular components (such as complexes and organelles) into, out of or within a cell, or between cells, or within a multicellular organism by means of some agent such as a transporter, pore or motor protein." [GOC:dos, G…	.	264	303	267	109	52	168	328	223	289	218	363	407	398	1088	807	1196	367	395	365	0.206589	0.227061	0.570478	2.01639	0.229299	1.6975e-16	-0.288879	0.22599	0.394847	0.968197	0.334706	0.0309527
ENSG00000185624	P4HB	prolyl 4-hydroxylase subunit beta	Any process that modulates the frequency, rate or extent of an oxidative stress-induced intrinsic apoptotic signaling pathway. [GOC:BHF, GOC:mtg_apoptosis, GOC:TermGenie, PMID:11672522];"A protein complex that catalyzes the formation of procollagen trans-4-hydroxy-L-proline and succinate from procollagen L-proline and 2-oxoglutarate, requiring Fe2+ and ascorbate. Contains two alpha subunits that …	COLE-CARPENTER SYNDROME 1;cellular response to hypoxia;eiF2alpha phosphorylation in response to endoplasmic reticulum stress;positive regulation of oxidative stress-induced intrinsic apoptotic signaling pathway;positive regulation of viral entry into host cell	4943	5222	4717	1628	939	5148	6138	4863	5079	3458	4828	4868	4762	20754	14998	20002	13347	12807	12077	-0.372476	0.213949	0.235295	1.97483	0.218735	2.16104e-17	0.563296	0.215359	0.0496956	1.00713	0.315602	0.0153266
ENSG00000176788	BASP1	brain abundant membrane attached signal protein 1	Any process that increases the rate or extent of heart growth. Heart growth is the increase in size or mass of the heart. [GOC:BHF, GOC:dph, GOC:tb];"A cellular component that forms a specialized region of connection between two or more cells or between a cell and the extracellular matrix. At a cell junction, anchoring proteins extend through the plasma membrane to link cytoskeletal proteins in o…	negative regulation of transcription DNA-templated;RNA polymerase II transcription corepressor activity	996	948	910	268	132	624	929	540	739	561	1045	929	1073	2972	2392	3180	1651	1536	1327	0.064701	0.205536	0.851509	1.96496	0.206631	2.82046e-19	0.175875	0.207136	0.591885	0.988918	0.302629	0.012656
ENSG00000151388	ADAMTS12	ADAM metallopeptidase with thrombospondin type 1 motif 12	Any process that results in a change in state or activity of a cell (in terms of movement, secretion, enzyme production, gene expression, etc.) as a result of a tumor necrosis factor stimulus. [GOC:mah];"Any process that stops, prevents or reduces the frequency, rate or extent of cellular response to vascular endothelial growth factor stimulus." [GOC:BHF, GOC:rl, GOC:TermGenie, PMID:17895370];"Th…	positive regulation of proteolysis involved in cellular protein catabolic process;cellular response to interleukin-1;cell-matrix adhesion;cellular response to tumor necrosis factor;negative regulation of vascular associated smooth muscle cell migration	582	588	610	110	93	332	446	431	497	305	705	725	817	1893	1607	1557	406	452	422	0.359835	0.23843	0.315266	1.94897	0.242007	6.74453e-14	-0.88124	0.242558	0.00339562	0.885218	0.361219	0.0743218
ENSG00000136026	CKAP4	cytoskeleton associated protein 4	The component of a membrane consisting of the gene products and protein complexes having at least some part of their peptide sequence embedded in the hydrophobic region of the membrane. [GOC:dos, GOC:go_curators];"The irregular network of unit membranes, visible only by electron microscopy, that occurs in the cytoplasm of many eukaryotic cells. The membranes form a complex meshwork of tubular cha…	.	2133	2264	2076	637	357	2309	1838	1522	1512	1148	2644	2407	2642	7437	5635	6828	5222	4981	4826	0.148934	0.170718	0.587125	1.94204	0.172845	8.27272e-27	0.659066	0.17004	0.00152465	1.09506	0.261443	0.000815935
ENSG00000134013	LOXL2	lysyl oxidase like 2	That part of the nuclear content other than the chromosomes or the nucleolus. [GOC:ma, ISBN:0124325653];"The attachment of a cell, either to another cell or to an underlying substrate such as the extracellular matrix, via cell adhesion molecules." [GOC:hb, GOC:pf];"The orderly movement of an endothelial cell into the extracellular matrix to form an endothelium." [GOC:go_curators];"The extension o…	endothelial cell proliferation;cell migration involved in sprouting angiogenesis;blood vessel endothelial cell migration;collagen fibril organization	137	165	156	69	48	179	187	178	164	98	350	288	256	634	620	541	538	441	352	0.478566	0.203409	0.0896475	1.92101	0.195886	1.73221e-20	0.598074	0.20176	0.0224207	1.13166	0.251022	0.000260156
ENSG00000123179	EBPL	emopamil binding protein like	The component of a membrane consisting of the gene products and protein complexes having at least some part of their peptide sequence embedded in the hydrophobic region of the membrane. [GOC:dos, GOC:go_curators];"The irregular network of unit membranes, visible only by electron microscopy, that occurs in the cytoplasm of many eukaryotic cells. The membranes form a complex meshwork of tubular cha…	.	799	882	731	467	233	861	1088	965	1017	720	1169	1277	1220	3874	2701	3750	1461	1554	1513	0.00947389	0.219666	0.98054	1.90874	0.22366	1.40062e-15	-0.134285	0.218147	0.694599	0.887374	0.31901	0.038707
ENSG00000144476	ACKR3	atypical chemokine receptor 3	The external part of the cell wall and/or plasma membrane. [GOC:jl, GOC:mtg_sensu, GOC:sm];"The attachment of a cell, either to another cell or to an underlying substrate such as the extracellular matrix, via cell adhesion molecules." [GOC:hb, GOC:pf];"Cytoplasm situated near, or occurring around, the nucleus." [GOC:jid];"A membrane-bounded organelle that receives incoming material from primary e…	chemokine-mediated signaling pathway;positive regulation of ERK1 and ERK2 cascade;negative regulation of intrinsic apoptotic signaling pathway in response to DNA damage;C-X-C chemokine receptor activity;C-X-C chemokine binding;negative regulation of receptor internalization;positive regulation of defense response to virus by host;scavenger receptor activity	954	940	854	227	133	818	887	794	708	464	1140	1153	1148	3129	2249	2863	843	839	843	0.216692	0.215709	0.527283	1.8894	0.219947	8.98242e-16	-0.668041	0.21901	0.0178998	0.841065	0.341357	0.0723698
ENSG00000148120	C9orf3	chromosome 9 open reading frame 3;microRNA 24-1	A small, dense body one or more of which are present in the nucleus of eukaryotic cells. It is rich in RNA and protein, is not bounded by a limiting membrane, and is not seen during mitosis. Its prime function is the transcription of the nucleolar DNA into 45S ribosomal-precursor RNA, the processing of this RNA into 5.8S, 18S, and 28S components of ribosomal RNA, and the association of these comp…	.	590	588	544	172	124	424	473	391	505	337	405	506	544	1898	1440	1773	661	649	597	-0.354004	0.147691	0.082585	1.881	0.131565	2.00149e-43	-0.419646	0.128084	0.00978653	0.758333	0.341941	0.111095
ENSG00000163378	EOGT	EGF domain specific O-linked N-acetylglucosamine transferase	Catalysis of the reaction: UDP-N-acetyl-D-glucosamine + protein = UDP + 4-N-(N-acetyl-D-glucosaminyl)-protein. [EC:2.4.1.94];"The volume enclosed by the membranes of the endoplasmic reticulum." [ISBN:0198547684];"The chemical reactions and pathways, including anabolism and catabolism, by which living organisms transform chemical substances. Metabolic processes typically transform small molecules,…	Adams Oliver syndrome;ADAMS-OLIVER SYNDROME 3;ADAMS-OLIVER SYNDROME 4	123	146	148	60	53	141	208	120	159	125	174	150	141	571	474	596	216	181	133	-0.36218	0.228702	0.28724	1.86378	0.21416	3.60538e-16	-0.627536	0.235066	0.0446157	0.709481	0.36647	0.171582
ENSG00000173221	GLRX	glutaredoxin	The protein modification process in which a glutathione molecule is removed from a protein amino acid by breaking a disulfide linkage. [GOC:tb];"Any molecular entity that serves as an electron acceptor and electron donor in an electron transport chain. An electron transport chain is a process in which a series of electron carriers operate together to transfer electrons from donors to any of sever…	.	218	319	218	79	57	213	169	205	173	123	502	524	516	797	577	793	191	203	228	0.941933	0.149664	2.93451e-08	1.86188	0.155526	1.92321e-30	-0.802405	0.163281	2.45044e-05	0.989078	0.325432	0.0221591
ENSG00000171241	SHCBP1	SHC binding and spindle associated 1	Any process that modulates the frequency, rate or extent of neural precursor cell proliferation. [GOC:dph, GOC:yaf];"Interacting selectively and non-covalently with any protein or protein complex (a complex of two or more proteins that may include other nonprotein molecules)." [GOC:go_curators];"Interacting selectively and non-covalently with a SH2 domain (Src homology 2) of a protein, a protein …	.	625	743	685	305	160	687	709	646	662	504	730	780	794	2642	1943	2497	1219	1208	894	-0.186741	0.155008	0.435785	1.8535	0.155704	4.17572e-30	-0.116418	0.161173	0.64804	0.816986	0.31359	0.0553226
ENSG00000181744	C3orf58	chromosome 3 open reading frame 58	Any process that modulates the frequency, rate or extent of signal transduction mediated by the phosphatidylinositol 3-kinase cascade. [GOC:ef];"A vesicle with a coat formed of the COPI coat complex proteins. COPI-coated vesicles are found associated with Golgi membranes at steady state, are involved in Golgi to endoplasmic reticulum (retrograde) vesicle transport, and possibly also in intra-Golg…	.	673	828	760	342	213	624	791	537	657	480	886	1011	852	2653	2014	2638	1512	1595	1378	0.0141083	0.117598	0.94491	1.85238	0.112842	2.50029e-57	0.26681	0.104433	0.0562693	0.920747	0.273169	0.00987218
ENSG00000168917	SLC35G2	solute carrier family 35 member G2	The membrane surrounding a cell that separates the cell from its external environment. It consists of a phospholipid bilayer and associated proteins. [ISBN:0716731363];"A compound membranous cytoplasmic organelle of eukaryotic cells, consisting of flattened, ribosome-free vesicles arranged in a more or less regular stack. The Golgi apparatus differs from the endoplasmic reticulum in often having …	.	109	154	144	47	25	88	84	69	75	56	193	216	173	364	277	378	294	340	281	0.607754	0.178372	0.00740023	1.84159	0.170528	8.4703e-25	0.805866	0.164607	2.6658e-05	1.17796	0.21539	4.00077e-06
ENSG00000162772	ATF3	activating transcription factor 3	Interacting selectively and non-covalently with an identical protein or proteins. [GOC:jl];"That part of the nuclear content other than the chromosomes or the nucleolus." [GOC:ma, ISBN:0124325653];"Modulation of the frequency, rate or extent of transcription from an RNA polymerase II promoter as a result of an arsenic stimulus from compounds containing arsenic, including arsenates, arsenites, and…	positive regulation of TRAIL-activated apoptotic signaling pathway	188	173	173	55	38	132	108	95	95	87	243	244	286	472	370	527	1144	1160	1085	0.584444	0.157077	0.00291387	1.83589	0.154363	4.67371e-30	2.25611	0.132096	3.85867e-62	1.68122	0.237271	5.37438e-10
ENSG00000102931	ARL2BP	ADP ribosylation factor like GTPase 2 binding protein	The region between the inner and outer lipid bilayers of the mitochondrial envelope. [GOC:mah];"Any process that modulates the frequency, rate or extent of nucleic acid-templated transcription." [GO_REF:0000058, GOC:pr, GOC:TermGenie, GOC:txnOH, GOC:vw];"The cellular process in which a signal is conveyed to trigger a change in the activity or state of a cell. Signal transduction begins with recep…	maintenance of protein location in nucleus;Retinitis pigmentosa;positive regulation of tyrosine phosphorylation of Stat3 protein;RETINITIS PIGMENTOSA WITH OR WITHOUT SITUS INVERSUS;ligand-dependent nuclear receptor transcription coactivator activity	833	897	715	391	268	915	613	525	499	345	1116	1155	1235	2590	2016	2716	2585	2647	2604	0.334106	0.168551	0.168704	1.82047	0.169111	1.21898e-24	1.04051	0.160677	6.32097e-09	1.16701	0.218969	7.66893e-06
ENSG00000186480	INSIG1	insulin induced gene 1	Any process that decreases the frequency, rate or extent of the chemical reactions and pathways resulting in the formation of steroids, compounds with a 1,2,cyclopentanoperhydrophenanthrene nucleus. [GOC:BHF, GOC:tb];"A series of molecular signals from the endoplasmic reticulum to the nucleus generated as a consequence of decreased levels of one or more sterols (and in some yeast, changes in oxyg…	negative regulation of cargo loading into COPII-coated vesicle	1624	1808	1684	456	263	1240	1331	1093	1213	869	1787	1798	1768	4812	3609	4671	3511	3344	3141	0.078487	0.158532	0.761641	1.79061	0.163928	2.32686e-25	0.523214	0.160179	0.010045	0.966235	0.253435	0.00271112
ENSG00000138814	PPP3CA	protein phosphatase 3 catalytic subunit alpha	Any process that stops, prevents, or reduces the frequency, rate or extent of the regulated release of insulin. [GOC:ai];"The formation of a protein dimer, a macromolecular structure consists of two noncovalently associated identical or nonidentical subunits." [ISBN:0198506732];"Catalysis of the reactions: protein serine phosphate + H2O = protein serine + phosphate; and protein threonine phosphat…	.	1046	1249	1236	335	200	745	733	574	696	488	1291	1395	1410	2953	2337	2857	914	983	890	0.353717	0.153052	0.0966562	1.77331	0.155743	1.58545e-27	-0.647316	0.154416	0.000488536	0.799242	0.313148	0.0613427
ENSG00000143772	ITPKB	inositol-trisphosphate 3-kinase B	The process of sparing immature T cells in the thymus which react with self-MHC protein complexes with low affinity levels from apoptotic death. [ISBN:0781735149, PMID:12414722];"Any process that modulates the frequency, rate or extent of addition of phosphate groups into an amino acid in a protein." [GOC:hjd];"The chemical reactions and pathways involving inositol phosphate, 1,2,3,4,5,6-cyclohex…	.	101	97	119	25	24	91	69	44	54	39	74	72	83	255	257	232	362	302	282	-0.349122	0.229266	0.310199	1.76776	0.213661	1.1797e-14	1.21923	0.205761	1.556e-07	1.09258	0.293602	0.00359568
ENSG00000181788	SIAH2	siah E3 ubiquitin protein ligase 2	Catalysis of the joining of two substances, or two groups within a single molecule, with the concomitant hydrolysis of the diphosphate bond in ATP or a similar triphosphate. [EC:6, GOC:mah];"The chemical reactions and pathways resulting in the breakdown of a protein or peptide by hydrolysis of its peptide bonds, initiated by the covalent attachment of a ubiquitin group, or multiple ubiquitin grou…	negative regulation of extrinsic apoptotic signaling pathway;negative regulation of cysteine-type endopeptidase activity involved in apoptotic process;canonical Wnt signaling pathway involved in negative regulation of apoptotic process	318	337	327	104	72	227	210	195	159	122	509	488	539	881	656	802	382	412	434	0.726143	0.149952	4.43447e-05	1.7637	0.152007	1.37085e-28	-0.040182	0.152607	0.876187	0.981824	0.254231	0.00236801
ENSG00000103381	CPPED1	calcineurin like phosphoesterase domain containing 1	All of the contents of a cell excluding the plasma membrane and nucleus, but including other subcellular structures. [ISBN:0198547684];"Interacting selectively and non-covalently with any metal ion." [GOC:ai];"The process of removing one or more phosphoric residues from a protein." [GOC:hb];"The membrane surrounding a cell that separates the cell from its external environment. It consists of a ph…	.	286	353	317	66	61	150	198	179	153	118	374	301	322	684	582	829	941	1075	961	0.273324	0.217955	0.415674	1.76093	0.217698	5.11563e-14	1.38573	0.210067	2.96181e-09	1.24928	0.233421	6.93003e-06
ENSG00000044574	HSPA5	heat shock protein family A (Hsp70) member 5	The external part of the cell wall and/or plasma membrane. [GOC:jl, GOC:mtg_sensu, GOC:sm];"A series of molecular signals mediated by the endoplasmic reticulum membrane stress sensor ATF6 (activating transcription factor 6). Begins with activation of ATF6 in response to endoplasmic reticulum (ER) stress, and ends with regulation of a downstream cellular process, e.g. transcription. Under conditio…	positive regulation of cell migration;mRNA export from nucleus;maintenance of protein localization in endoplasmic reticulum;endoplasmic reticulum;canonical Wnt signaling pathway involved in negative regulation of apoptotic process	5084	5613	6061	3840	1984	5709	6127	4472	5349	4697	3122	3151	2960	22787	17188	19594	9421	9266	8232	-1.33183	0.185626	1.24281e-10	1.75954	0.188906	1.71035e-18	-0.255857	0.181009	0.34105	0.583833	0.381681	0.291367
ENSG00000065485	PDIA5	protein disulfide isomerase family A member 5;microRNA 7110	A series of molecular signals mediated by the endoplasmic reticulum stress sensor IRE1 (Inositol-requiring transmembrane kinase/endonuclease). Begins with activation of IRE1 in response to endoplasmic reticulum (ER) stress, and ends with regulation of a downstream cellular process, e.g. transcription. One target of activated IRE1 is the transcription factor HAC1 in yeast, or XBP1 in mammals; IRE1…	.	349	321	307	208	117	446	443	396	508	288	762	838	933	1554	1115	1391	752	745	634	0.64639	0.241083	0.0463219	1.7485	0.241081	2.444e-11	-0.0401792	0.238345	0.921919	0.956095	0.271694	0.00659575
ENSG00000146242	TPBG	trophoblast glycoprotein	The irregular network of unit membranes, visible only by electron microscopy, that occurs in the cytoplasm of many eukaryotic cells. The membranes form a complex meshwork of tubular channels, which are often expanded into slitlike cavities called cisternae. The ER takes two forms, rough (or granular), with ribosomes adhering to the outer surface, and smooth (with no ribosomes attached). [ISBN:019…	.	358	394	413	142	88	468	316	261	281	161	883	811	912	1077	974	1161	8516	8842	8197	1.00673	0.157795	1.79304e-08	1.74654	0.155874	1.13031e-26	3.83356	0.147571	1.05192e-144	2.54894	0.364894	9.55019e-10
ENSG00000082014	SMARCD3	SWI/SNF related, matrix associated, actin dependent regulator of chromatin, subfamily d, member 3	The developmental process pertaining to the initial formation of a right cardiac ventricle from unspecified parts. [GOC:mtg_heart];"The chemical reactions and pathways involving lipids, as carried out by individual cells." [GOC:jl];"The cellular synthesis of RNA on a template of DNA." [GOC:jl, GOC:txnOH];"Any process that activates or increases the frequency, rate or extent of cellular DNA-templa…	.	157	111	130	81	51	215	111	95	97	84	309	290	315	502	387	453	1222	1256	1181	0.759357	0.240423	0.0146053	1.74142	0.238696	1.82166e-11	2.29391	0.227642	2.07524e-21	1.69854	0.240638	6.44746e-10
ENSG00000172037	LAMB2	laminin subunit beta 2	A thin sheet of proteoglycans and glycoproteins, especially laminin, secreted by cells as an extracellular matrix. [ISBN:0198547684];"A large, extracellular glycoprotein complex composed of three different polypeptide chains, alpha, beta and gamma. Provides an integral part of the structural scaffolding of basement membranes." [GOC:jl, http://www.sdbonline.org/fly/newgene/laminna1.htm, PMID:10842…	Synaptic congenital myasthenic syndromes;Nephrotic syndrome type 5 with or without ocular abnormalities;LAMB-2-related infantile-onset nephrotic syndrome;PIERSON SYNDROME	694	656	608	233	133	790	831	682	589	519	1315	1098	1097	2426	1856	2206	5964	5638	5339	0.431196	0.224922	0.185451	1.73989	0.221844	3.37806e-13	2.22798	0.218658	7.00077e-22	1.6126	0.258282	7.75959e-08
ENSG00000205730	ITPRIPL2	inositol 1,4,5-trisphosphate receptor interacting protein like 2	The component of a membrane consisting of the gene products and protein complexes having at least some part of their peptide sequence embedded in the hydrophobic region of the membrane. [GOC:dos, GOC:go_curators]	.	556	629	626	165	132	503	551	425	447	381	459	379	411	1838	1387	1693	459	533	433	-0.658802	0.149566	0.000268625	1.73884	0.142836	1.81699e-31	-0.922948	0.145656	1.47172e-08	0.551554	0.371093	0.30571
ENSG00000182197	EXT1	exostosin glycosyltransferase 1	The process whose specific outcome is the progression of the mesoderm over time, from its formation to the mature structure. The mesoderm is the middle germ layer that develops into muscle, bone, cartilage, blood and connective tissue. [GOC:dph, GOC:tb];"Catalysis of the reaction: UDP-N-acetyl-D-glucosamine + heparan sulfate = UDP + (N-acetyl-D-glucosaminyl)-heparan sulfate." [GOC:ma];"Catalysis …	tricho-rhino-phalangeal syndrome type 2 (TRPS2);endochondral ossification;Langer-Giedion syndrome;heparan sulfate proteoglycan biosynthetic process polysaccharide chain biosynthetic process;EXOSTOSES MULTIPLE TYPE I;Multiple osteochondromas;hereditary multiple exostoses type 1 (EXT1);CHONDROSARCOMA	1691	1946	1839	470	225	940	1431	1283	1450	780	1387	1263	1428	4769	3780	4415	2539	2627	2705	-0.345434	0.230322	0.318051	1.72651	0.233192	8.38485e-12	0.142175	0.233606	0.698653	0.770982	0.307455	0.0665551
ENSG00000131873	CHSY1	chondroitin sulfate synthase 1	The chemical reactions and pathways resulting in the formation of chondroitin sulfate, any member of a group of 10-60 kDa glycosaminoglycans, widely distributed in cartilage and other mammalian connective tissues, the repeat units of which consist of beta-(1,4)-linked D-glucuronyl beta-(1,3)-N-acetyl-D-galactosamine sulfate. [GOC:mah, ISBN:0198506732];"The space external to the outermost structur…	negative regulation of ossification;Temtamy preaxial brachydactyly syndrome	1766	1925	1900	739	476	1356	1915	1559	1677	1151	1807	1780	1924	6247	4275	5771	3477	3815	3393	-0.262348	0.12937	0.156634	1.72277	0.138025	4.74664e-33	0.237624	0.125823	0.179486	0.795712	0.279959	0.0343245
ENSG00000163110	PDLIM5	PDZ and LIM domain 5	A lipid bilayer along with all the proteins and protein complexes embedded in it an attached to it. [GOC:dos, GOC:mah, ISBN:0815316194];"Interacting selectively and non-covalently with zinc (Zn) ions." [GOC:ai];"The part of the cytoplasm that does not contain organelles but which does contain other particulate matter, such as protein complexes." [GOC:hjd, GOC:jl];"Interacting selectively and non-…	.	1519	1597	1496	506	394	1167	1287	1196	1358	853	2949	2928	3106	4298	3891	4359	3154	2957	3023	0.795698	0.108891	5.12664e-11	1.71737	0.108821	5.80764e-53	0.371057	0.10789	0.00616372	1.05566	0.199578	9.29246e-06
ENSG00000116729	WLS	wntless Wnt ligand secretion mediator	The controlled release of a Wnt protein from a cell. [GOC:bf, PMID:19223472];"The network of interconnected tubular and cisternal structures located within the Golgi apparatus on the side distal to the endoplasmic reticulum, from which secretory vesicles emerge. The trans-Golgi network is important in the later stages of protein secretion where it is thought to play a key role in the sorting and …	intracellular protein transport;negative regulation of Wnt protein secretion;positive regulation of Wnt signaling pathway;positive regulation of canonical Wnt signaling pathway;positive regulation of Wnt protein secretion	2729	2843	2768	776	439	2258	2349	1999	2040	1558	4051	4223	4740	7258	6043	7787	34598	36825	36878	0.57743	0.168629	0.00703294	1.70312	0.168875	1.17227e-21	3.16404	0.167673	5.28198e-76	2.09332	0.326177	2.84652e-08
ENSG00000164294	GPX8	glutathione peroxidase 8 (putative)	The component of a membrane consisting of the gene products and protein complexes having at least some part of their peptide sequence embedded in the hydrophobic region of the membrane. [GOC:dos, GOC:go_curators];"Catalysis of the reaction: donor + hydrogen peroxide = oxidized donor + 2 H2O." [EC:1.11.1.7];"A metabolic process that results in the removal or addition of one or more electrons to or…	.	1518	1657	1498	788	485	1653	1964	1682	1714	1322	2301	2409	2278	6173	4231	5848	4643	4844	4578	0.0630312	0.182635	0.835928	1.69663	0.188548	2.79758e-17	0.616334	0.179059	0.00611551	0.935683	0.243454	0.00249003
ENSG00000108854	SMURF2	.	.	.	1654	1775	1527	726	426	1305	1205	1107	1166	773	1495	1490	1499	4759	3485	4552	3380	3491	3380	-0.248406	0.0806565	0.0179845	1.69344	0.0909567	6.79763e-74	0.491916	0.0739821	2.13323e-09	0.83803	0.260079	0.01419
ENSG00000142794	NBPF3	neuroblastoma breakpoint family member 3	All of the contents of a cell excluding the plasma membrane and nucleus, but including other subcellular structures. [ISBN:0198547684];"Any process that activates or increases the frequency, rate or extent of protein targeting to mitochondrion." [GO_REF:0000058, GOC:pad, GOC:PARL, GOC:TermGenie, PMID:24270810]	positive regulation of protein targeting to mitochondrion	197	209	220	101	59	211	217	230	288	167	355	370	378	850	576	718	578	609	609	0.31409	0.212268	0.325914	1.68992	0.216127	4.02754e-13	0.565381	0.208218	0.040276	0.970994	0.235418	0.00101222
ENSG00000136240	KDELR2	KDEL endoplasmic reticulum protein retention receptor 2	The component of a membrane consisting of the gene products and protein complexes having at least some part of their peptide sequence embedded in the hydrophobic region of the membrane. [GOC:dos, GOC:go_curators];"The irregular network of unit membranes, visible only by electron microscopy, that occurs in the cytoplasm of many eukaryotic cells. The membranes form a complex meshwork of tubular cha…	.	2085	2201	2099	539	350	1792	2000	1563	1921	1148	2484	2607	2648	6004	4783	5636	4372	4359	4048	0.168991	0.190416	0.579966	1.6771	0.192817	3.74468e-16	0.437155	0.191601	0.0953326	0.903706	0.242027	0.003466
ENSG00000151929	BAG3	BCL2 associated athanogene 3	Platelike region of a muscle sarcomere to which the plus ends of actin filaments are attached. [GOC:mtg_muscle, ISBN:0815316194];"Interacting selectively and non-covalently with any protein complex (a complex of two or more proteins that may include other nonprotein molecules)." [GOC:mah];"Any process that results in a change in state or activity of a cell (in terms of movement, secretion, enzyme…	Myopathy myofibrillar 6;Familial isolated dilated cardiomyopathy;Muscular dystrophy Selcen type;CARDIOMYOPATHY DILATED 1HH	81	100	94	20	11	54	69	51	67	49	78	63	76	217	210	191	157	117	105	-0.267894	0.231992	0.458898	1.6598	0.212817	4.68847e-13	0.0744955	0.228797	0.845369	0.740546	0.310679	0.0840724
ENSG00000148248	SURF4	surfeit 4	The component of a membrane consisting of the gene products and protein complexes having at least some part of their peptide sequence embedded in the hydrophobic region of the membrane. [GOC:dos, GOC:go_curators];"Any process that increases the frequency, rate or extent of a process involved in the formation, arrangement of constituent parts, or disassembly of an organelle." [GOC:dph, GOC:tb];"An…	positive regulation of organelle organization;Golgi organization	2971	2977	2770	1163	598	3599	4014	3274	3415	2425	3178	3103	3219	10495	7920	10457	8680	8289	7612	-0.365483	0.239722	0.309666	1.63696	0.243365	8.51784e-10	0.535488	0.241455	0.106259	0.812068	0.286036	0.0345369
ENSG00000140937	CDH11	cadherin 11	The component of a membrane consisting of the gene products and protein complexes having at least some part of their peptide sequence embedded in the hydrophobic region of the membrane. [GOC:dos, GOC:go_curators];"Interacting selectively and non-covalently with calcium ions (Ca2+)." [GOC:ai];"The formation of bone or of a bony substance, or the conversion of fibrous tissue or of cartilage into bo…	.	5131	5650	5221	1212	691	2335	4290	3535	3787	2644	2524	2570	2533	12921	9509	12135	4528	4211	3993	-0.944837	0.242473	0.00163982	1.61795	0.248629	3.3663e-09	-0.670036	0.247167	0.0406863	0.470557	0.372126	0.391722
ENSG00000197261	C6orf141	chromosome 6 open reading frame 141	.	.	162	171	108	54	32	202	184	148	139	113	54	59	57	472	419	463	25	14	27	-1.75582	0.257228	1.26212e-09	1.60708	0.228939	1.21432e-10	-3.51475	0.304484	4.61768e-28	0.17997	0.526917	0.842367
ENSG00000090615	GOLGA3	golgin A3	That part of the nuclear content other than the chromosomes or the nucleolus. [GOC:ma, ISBN:0124325653];"A lipid bilayer along with all the proteins and protein complexes embedded in it an attached to it." [GOC:dos, GOC:mah, ISBN:0815316194];"The component of a Golgi membrane consisting of gene products and protein complexes that are loosely bound to one of its surfaces, but not integrated into t…	.	951	985	960	207	118	568	790	503	665	454	600	512	557	2192	1768	2067	1401	1435	1258	-0.658444	0.226523	0.0278835	1.59506	0.226263	9.96052e-11	0.16552	0.226212	0.643701	0.651443	0.313373	0.138802
ENSG00000105928	DFNA5	DFNA5, deafness associated tumor suppressor	All of the contents of a cell excluding the plasma membrane and nucleus, but including other subcellular structures. [ISBN:0198547684];"The series of events required for an organism to receive an auditory stimulus, convert it to a molecular signal, and recognize and characterize the signal. Sonic stimuli are detected in the form of vibrations and are processed to form a sound." [GOC:ai];"Any proc…	Autosomal dominant nonsyndromic sensorineural deafness type DFNA;deafness autosomal dominant type 5;Deafness autosomal dominant 5	417	439	418	184	143	518	337	271	317	212	486	528	481	1290	934	1125	176	192	218	-0.00405327	0.150535	0.988575	1.58496	0.151042	1.92419e-23	-1.79024	0.160767	3.91646e-26	0.474921	0.384875	0.405038
ENSG00000093010	COMT	catechol-O-methyltransferase;microRNA 4761	Catalysis of the transfer of a methyl group to an acceptor molecule. [ISBN:0198506732];"The chemical reactions and pathways resulting in the breakdown of any of a group of substances that are released on excitation from the axon terminal of a presynaptic neuron of the central or peripheral nervous system and travel across the synaptic cleft to either excite or inhibit the target cell." [CHEBI:255…	Cisplatin toxicity;Toxicity or absent response to clozapine;PANIC DISORDER 1;SCHIZOPHRENIA;22q11.2 Deletion Syndrome	364	293	346	72	60	264	283	204	192	174	566	374	368	764	665	785	889	843	739	0.395828	0.214614	0.205701	1.58479	0.18629	1.74643e-15	0.856241	0.185998	9.64757e-05	1.0216	0.205064	3.81599e-05
ENSG00000165813	CCDC186	.	.	.	492	591	470	272	192	366	728	518	593	495	718	707	608	1924	1319	1818	1125	1280	1080	-0.142441	0.238107	0.708928	1.5765	0.240137	2.37611e-09	0.1769	0.234292	0.636246	0.723932	0.277919	0.0553811
ENSG00000136560	TANK	TRAF family member associated NFKB activator	Any process that results in a change in state or activity of a cell (in terms of movement, secretion, enzyme production, gene expression, etc.) as a result of a tumor necrosis factor stimulus. [GOC:mah];"The cellular process in which a signal is conveyed to trigger a change in the activity or state of a cell. Signal transduction begins with reception of a signal (e.g. a ligand binding to a recept…	positive regulation of protein deubiquitination;positive regulation of ubiquitin-specific protease activity;cellular response to ionizing radiation;cellular response to tumor necrosis factor;negative regulation of I-kappaB kinase/NF-kappaB signaling;cellular response to interleukin-1;thiol-dependent ubiquitin-specific protease activity;cellular response to DNA damage stimulus;deubiquitinase activ…	489	652	522	283	193	522	590	450	518	355	740	820	789	1650	1357	1712	1125	1105	1136	0.134088	0.134003	0.528846	1.57148	0.13	4.97894e-31	0.20369	0.125096	0.258884	0.772688	0.23459	0.0118126
ENSG00000131871	VIMP	VCP interacting membrane selenoprotein	A triglyceride-rich lipoprotein particle that is typically composed of APOB100, APOE and APOCs and has a density of about 1.006 g/ml and a diameter of between 20-80 nm. It is found in blood and transports endogenous products (newly synthesized cholesterol and triglycerides) from the liver. [GOC:BHF, GOC:expert_pt, GOC:mah, GOC:rl];"Any process that results in a change in state or activity of a ce…	negative regulation of nitric-oxide synthase biosynthetic process;negative regulation of macrophage apoptotic process;cellular response to oxidative stress;negative regulation of endoplasmic reticulum stress-induced intrinsic apoptotic signaling pathway;cellular response to lipopolysaccharide;regulation of nitric oxide metabolic process;negative regulation of acute inflammatory response to antige…	621	632	635	347	210	733	716	529	584	417	678	745	744	1989	1549	2047	1473	1522	1399	-0.22475	0.143854	0.295151	1.5659	0.141186	3.82206e-26	0.340353	0.132904	0.0555864	0.734373	0.254594	0.0314619
ENSG00000138835	RGS3	regulator of G-protein signaling 3	Any process that modulates the frequency, rate or extent of G-protein coupled receptor protein signaling pathway activity. [GOC:go_curators];"The membrane surrounding a cell that separates the cell from its external environment. It consists of a phospholipid bilayer and associated proteins." [ISBN:0716731363];"That part of the nuclear content other than the chromosomes or the nucleolus." [GOC:ma,…	.	220	262	243	105	73	304	278	201	241	161	446	473	410	698	613	764	1451	1316	1294	0.465956	0.159042	0.0263757	1.54219	0.153303	1.48214e-21	1.62028	0.146843	1.19382e-25	1.27838	0.189354	3.95107e-09
ENSG00000090520	DNAJB11	DnaJ heat shock protein family (Hsp40) member B11	The irregular network of unit membranes, visible only by electron microscopy, that occurs in the cytoplasm of many eukaryotic cells. The membranes form a complex meshwork of tubular channels, which are often expanded into slitlike cavities called cisternae. The ER takes two forms, rough (or granular), with ribosomes adhering to the outer surface, and smooth (with no ribosomes attached). [ISBN:019…	.	880	998	867	373	216	970	993	670	857	616	856	854	927	2711	2013	2559	1511	1477	1302	-0.355037	0.135264	0.0521219	1.53526	0.135735	3.66941e-27	-0.108487	0.130603	0.599544	0.598284	0.281723	0.129514
ENSG00000155970	MICU3	mitochondrial calcium uptake family member 3	The component of a membrane consisting of the gene products and protein complexes having at least some part of their peptide sequence embedded in the hydrophobic region of the membrane. [GOC:dos, GOC:go_curators];"Interacting selectively and non-covalently with calcium ions (Ca2+)." [GOC:ai];"A semiautonomous, self replicating organelle that occurs in varying numbers, shapes, and sizes in the cyt…	.	488	571	517	236	145	441	377	304	369	244	562	598	600	1281	1045	1252	518	568	521	0.0601807	0.102716	0.715198	1.51757	0.099433	1.54041e-49	-0.521299	0.0971192	2.92167e-06	0.586289	0.281305	0.137693
ENSG00000124104	SNX21	sorting nexin family member 21	Interacting selectively and non-covalently with phosphatidylinositol-3-phosphate, a derivative of phosphatidylinositol in which the inositol ring is phosphorylated at the 3' position. [GOC:bf, PMID:10209156, PMID:11395417, PMID:11557775];"The directed movement of proteins into, out of or within a cell, or between cells, by means of some agent such as a transporter or pore." [GOC:ai];"Interacting …	.	137	143	131	64	33	143	197	119	130	131	188	148	135	417	342	451	226	216	195	-0.261561	0.232903	0.4723	1.51099	0.215123	1.18142e-10	-0.280523	0.216254	0.387106	0.567252	0.302093	0.186472
ENSG00000115084	SLC35F5	.	.	.	1189	1298	1214	367	263	979	1114	895	1073	835	1531	1546	1501	3125	2384	3222	2241	2464	2315	0.140498	0.148061	0.552698	1.49745	0.153147	2.26003e-20	0.304749	0.148118	0.138039	0.768628	0.221106	0.00739449
ENSG00000164117	FBXO8	F-box protein 8	The chemical reactions and pathways resulting in the breakdown of a protein or peptide by hydrolysis of its peptide bonds, initiated by the covalent attachment of a ubiquitin group, or multiple ubiquitin groups, to the protein. [GOC:go_curators];"A protein complex that includes a ubiquitin-protein ligase and enables ubiquitin protein ligase activity. The complex also contains other proteins that …	.	239	275	239	140	70	310	275	240	256	178	401	470	480	745	616	803	516	570	521	0.386387	0.169295	0.102404	1.49614	0.162384	4.27058e-18	0.188098	0.158397	0.434097	0.794465	0.217846	0.00454878
ENSG00000107959	PITRM1	pitrilysin metallopeptidase 1	Catalysis of the hydrolysis of internal, alpha-peptide bonds in a polypeptide chain by a mechanism in which water acts as a nucleophile, one or two metal ions hold the water molecule in place, and charged amino acid side chains are ligands for the metal ions. [GOC:mah, http://merops.sanger.ac.uk/about/glossary.htm#CATTYPE, http://merops.sanger.ac.uk/about/glossary.htm#ENDOPEPTIDASE];"Any protein …	metalloendopeptidase activity;self proteolysis	762	791	732	400	228	667	884	719	803	487	1177	1166	1184	2340	1794	2183	2194	2201	2115	0.224875	0.150918	0.322346	1.49479	0.151958	1.30369e-20	0.656123	0.145251	0.000137838	0.875184	0.196281	0.00031002
ENSG00000110921	MVK	mevalonate kinase	The chemical reactions and pathways resulting in the formation of isopentenyl diphosphate, via the intermediate mevalonate. This pathway converts acetate, in the form of acetyl-CoA, to isopentenyl diphosphate (IPP), the fundamental unit in isoprenoid biosynthesis, through a series of mevalonate intermediates. [GOC:go_curators, MetaCyc:PWY-922];"Interacting selectively and non-covalently with an i…	negative regulation of inflammatory response;MEVALONIC ACIDURIA;mevalonate kinase activity;Porokeratosis of Mibelli;POROKERATOSIS 3 MULTIPLE TYPES;Disseminated superficial actinic porokeratosis;Hyperimmunoglobulinemia D with periodic fever;HYPER-IgD SYNDROME	562	558	495	94	70	430	433	353	341	223	553	436	461	1095	969	1136	1335	1180	1116	-0.0654074	0.242232	0.873873	1.49108	0.237804	1.45338e-08	0.79024	0.239543	0.00919056	0.864242	0.244761	0.00637496
ENSG00000224531	SMIM13	small integral membrane protein 13	The component of a membrane consisting of the gene products and protein complexes having at least some part of their peptide sequence embedded in the hydrophobic region of the membrane. [GOC:dos, GOC:go_curators]	.	472	625	502	248	131	541	570	383	557	404	686	714	706	1605	1131	1535	1004	1137	1009	0.0487306	0.157012	0.853877	1.49094	0.162288	5.26181e-18	0.176507	0.153845	0.452893	0.713312	0.236623	0.0235229
ENSG00000052802	MSMO1	methylsterol monooxygenase 1	The component of a membrane consisting of the gene products and protein complexes having at least some part of their peptide sequence embedded in the hydrophobic region of the membrane. [GOC:dos, GOC:go_curators];"The irregular network of unit membranes, visible only by electron microscopy, that occurs in the cytoplasm of many eukaryotic cells. The membranes form a complex meshwork of tubular cha…	MICROCEPHALY CONGENITAL CATARACT AND PSORIASIFORM DERMATITIS	4760	5242	4554	1436	760	4214	3940	3301	3723	2709	7308	7795	7391	11727	8303	11795	10693	11151	10752	0.558349	0.160406	0.00593577	1.48415	0.169421	2.22323e-16	0.642351	0.161665	0.00109351	0.951163	0.172612	3.30161e-06
ENSG00000067208	EVI5	ecotropic viral integration site 5	The biological process whose specific outcome is the progression of a multicellular organism over time from an initial condition (e.g. a zygote or a young adult) to a later condition (e.g. a multicellular animal or an aged adult). [GOC:dph, GOC:ems, GOC:isa_complete, GOC:tb];"Any process that modulates the frequency, rate or extent of vesicle fusion." [GOC:mah];"An intracellular structure that ca…	retrograde transport endosome to Golgi	807	1000	910	438	280	864	967	756	900	672	1270	1272	1335	2580	2119	2600	2027	2194	2023	0.13021	0.135413	0.546205	1.47431	0.134185	1.17331e-25	0.365635	0.129604	0.0316021	0.764601	0.211763	0.00508317
ENSG00000023909	GCLM	glutamate-cysteine ligase modifier subunit	Any process that results in a change in state or activity of a cell or an organism (in terms of movement, secretion, enzyme production, gene expression, etc.) as a result of an activity stimulus. [GOC:mtg_muscle];"The chemical reactions and pathways involving cysteine, 2-amino-3-mercaptopropanoic acid." [GOC:go_curators];"The chemical reactions and pathways resulting in the formation of glutathio…	glutamate-cysteine ligase activity;MYOCARDIAL INFARCTION SUSCEPTIBILITY TO MYOCARDIAL INFARCTION SUSCEPTIBILITY TO 1 INCLUDED;regulation of blood vessel size;glutathione biosynthetic process	477	575	519	163	98	319	335	219	309	206	315	331	290	1017	886	1029	548	507	438	-0.595362	0.165663	0.00430802	1.47397	0.160262	4.85325e-18	-0.380138	0.163479	0.0882803	0.471035	0.310034	0.295034
ENSG00000134851	TMEM165	transmembrane protein 165	The component of a membrane consisting of the gene products and protein complexes having at least some part of their peptide sequence embedded in the hydrophobic region of the membrane. [GOC:dos, GOC:go_curators];"The lipid bilayer surrounding a late endosome." [GOC:pz];"Any process involved in the maintenance of an internal steady state of calcium ions at the level of a cell." [GOC:ceb, GOC:mah]…	regulation of lysosomal lumen pH;Congenital disorder of glycosylation type IIk;protein N-linked glycosylation;TMEM165-CDG syndrome	1058	1137	1067	646	317	1341	1314	1010	1094	841	1174	1251	1136	3483	2567	3459	2011	2275	1929	-0.362413	0.16997	0.13164	1.47221	0.171414	9.07013e-16	-0.0153961	0.165637	0.957725	0.579043	0.274404	0.132107
ENSG00000170876	TMEM43	.	.	ARRHYTHMOGENIC RIGHT VENTRICULAR DYSPLASIA FAMILIAL 5	1122	1267	1142	343	211	726	996	789	811	635	1058	1102	1134	2687	2112	2552	2101	2177	2223	-0.113769	0.147648	0.637449	1.47102	0.149245	1.08083e-20	0.412544	0.147817	0.0339582	0.730079	0.232222	0.0172449
ENSG00000068912	ERLEC1	endoplasmic reticulum lectin 1	Interacting selectively and non-covalently with an unfolded protein. [GOC:ai];"Interacting selectively and non-covalently with any protein or protein complex (a complex of two or more proteins that may include other nonprotein molecules)." [GOC:go_curators];"Any process that stops, prevents or reduces the frequency, rate or extent of retrograde protein transport, ER to cytosol." [GO_REF:0000058, …	negative regulation of retrograde protein transport ER to cytosol	863	995	954	497	307	821	1117	852	1051	722	1299	1329	1300	2896	2080	2894	1651	1853	1789	0.0299359	0.167748	0.91717	1.45314	0.172951	4.12705e-15	0.0103967	0.165688	0.972105	0.650577	0.244679	0.0499156
ENSG00000173540	GMPPB	GDP-mannose pyrophosphorylase B	A semiautonomous, self replicating organelle that occurs in varying numbers, shapes, and sizes in the cytoplasm of virtually all eukaryotic cells. It is notably the site of tissue respiration. [GOC:giardia, ISBN:0198506732];"All of the contents of a cell excluding the plasma membrane and nucleus, but including other subcellular structures." [ISBN:0198547684];"The chemical reactions and pathways r…	MUSCULAR DYSTROPHY-DYSTROGLYCANOPATHY (CONGENITAL WITH MENTAL RETARDATION) TYPE B 14;Autosomal recessive limb-girdle muscular dystrophy type 2T;MUSCULAR DYSTROPHY-DYSTROGLYCANOPATHY (CONGENITAL WITH BRAIN AND EYE ANOMALIES) TYPE A 14;Congenital myasthenic syndromes with glycosylation defect;Congenital muscular dystrophy with intellectual disability;Muscle-eye-brain disease with bilateral multicys…	406	435	368	115	69	461	486	297	390	299	361	366	326	1080	845	1102	1064	916	776	-0.474863	0.230842	0.148947	1.45232	0.228545	8.65659e-09	0.440729	0.232754	0.178077	0.668863	0.278528	0.0813923
ENSG00000197381	ADARB1	adenosine deaminase, RNA specific B1	A small, dense body one or more of which are present in the nucleus of eukaryotic cells. It is rich in RNA and protein, is not bounded by a limiting membrane, and is not seen during mitosis. Its prime function is the transcription of the nucleolar DNA into 45S ribosomal-precursor RNA, the processing of this RNA into 5.8S, 18S, and 28S components of ribosomal RNA, and the association of these comp…	positive regulation of viral genome replication	203	223	214	61	45	181	249	226	244	147	285	348	321	559	530	559	717	690	708	0.235411	0.234353	0.527283	1.45115	0.229433	1.03864e-08	0.923519	0.226902	0.000768969	0.946273	0.210409	0.000270854
ENSG00000145050	MANF	mesencephalic astrocyte derived neurotrophic factor	The irregular network of unit membranes, visible only by electron microscopy, that occurs in the cytoplasm of many eukaryotic cells. The membranes form a complex meshwork of tubular channels, which are often expanded into slitlike cavities called cisternae. The ER takes two forms, rough (or granular), with ribosomes adhering to the outer surface, and smooth (with no ribosomes attached). [ISBN:019…	.	1191	1328	1140	474	245	1310	1293	1085	1091	672	957	901	1067	3260	2569	3109	2203	2250	2211	-0.584108	0.159674	0.00354886	1.44896	0.155214	1.42117e-18	0.145488	0.153192	0.543884	0.568098	0.278936	0.14851
ENSG00000128595	CALU	.	.	.	6294	7281	6583	3891	2299	6095	8697	7190	8011	5334	11386	12486	12168	22416	15897	21138	18271	19237	18034	0.298896	0.192383	0.298351	1.44305	0.19671	1.37166e-11	0.471533	0.188908	0.0634762	0.820798	0.202978	0.00131896
ENSG00000157020	SEC13	SEC13 homolog, nuclear pore and COPII coat complex component	The addition of COPII proteins and adaptor proteins to ER membranes during the formation of transport vesicles, forming a vesicle coat. [GOC:ascb_2009, GOC:dph, GOC:jid, GOC:mah, GOC:tb, ISBN:0716731363, PMID:10219233];"A subcomplex of the nuclear pore complex (NPC) that forms the outer rings of the core scaffold, a lattice-like structure that gives the NPC its shape and strength. In S. cerevisia…	positive regulation of TOR signaling	2272	2243	2126	918	463	2653	2888	2411	2384	1500	2530	2627	2362	6547	5139	6538	5377	5112	5098	-0.248071	0.211826	0.451196	1.44266	0.212762	5.99592e-10	0.343397	0.211245	0.259817	0.673548	0.254278	0.0509295
ENSG00000229989	MIR181A1HG	.	.	.	77	84	78	30	28	35	53	60	65	56	85	69	97	206	175	155	187	201	174	-0.0760665	0.253799	0.859525	1.43785	0.241489	9.07422e-08	0.625432	0.224031	0.0339088	0.763894	0.251089	0.0219923
ENSG00000119812	FAM98A	family with sequence similarity 98 member A	Interacting selectively and non-covalently with any protein or protein complex (a complex of two or more proteins that may include other nonprotein molecules). [GOC:go_curators];"A protein complex that catalyzes the ligation of cleaved pre-tRNAs by directly joining spliced tRNA halves to mature-sized tRNAs by incorporating the precursor-derived splice junction phosphate into the mature tRNA as a …	.	730	847	818	350	220	595	632	541	562	467	766	790	806	1891	1550	1824	735	839	747	-0.166876	0.0924824	0.216489	1.42395	0.0903605	7.89542e-53	-0.643395	0.0899173	7.82509e-11	0.46288	0.287978	0.266238
ENSG00000213853	EMP2	epithelial membrane protein 2	The external part of the cell wall and/or plasma membrane. [GOC:jl, GOC:mtg_sensu, GOC:sm];"The assembly of a bleb, a cell extension caused by localized decoupling of the cytoskeleton from the plasma membrane and characterized by rapid formation, rounded shape, and scarcity of organelles within the protrusion. Plasma membrane blebbing occurs during apoptosis and other cellular processes, includin…	Nephrotic syndrome type 10;negative regulation of angiogenesis;embryo implantation;Idiopathic steroid-sensitive nephrotic syndrome with minimal change;Idiopathic steroid-sensitive nephrotic syndrome with focal segmental hyalinosis;positive regulation of cell proliferation;positive regulation of protein localization to cell surface;Familial idiopathic steroid-resistant nephrotic syndrome with mini…	1131	1208	987	432	262	946	853	756	779	523	1724	1678	1953	2580	1926	2576	2124	2205	2011	0.586314	0.0825208	1.95192e-10	1.42245	0.0837451	1.91741e-61	0.377076	0.0669569	7.59166e-07	0.858073	0.166055	1.66127e-05
ENSG00000152749	GPR180	G protein-coupled receptor 180	The component of a membrane consisting of the gene products and protein complexes having at least some part of their peptide sequence embedded in the hydrophobic region of the membrane. [GOC:dos, GOC:go_curators];"A series of molecular signals that proceeds with an activated receptor promoting the exchange of GDP for GTP on the alpha-subunit of an associated heterotrimeric G-protein complex. The …	.	757	945	799	533	313	989	736	609	675	466	1520	1465	1606	2421	1738	2324	1415	1503	1383	0.496944	0.174444	0.0320763	1.42162	0.178088	1.16233e-13	-0.0411271	0.167684	0.88461	0.737924	0.223361	0.0114843
ENSG00000108829	LRRC59	leucine rich repeat containing 59	The component of a membrane consisting of the gene products and protein complexes having at least some part of their peptide sequence embedded in the hydrophobic region of the membrane. [GOC:dos, GOC:go_curators];"The irregular network of unit membranes, visible only by electron microscopy, that occurs in the cytoplasm of many eukaryotic cells. The membranes form a complex meshwork of tubular cha…	.	4305	4587	4039	1702	1021	4357	4836	3770	4024	2871	3604	3396	3676	11517	8830	11740	8180	7513	7312	-0.589561	0.142211	0.000704693	1.41994	0.144387	1.32785e-20	0.0611559	0.140297	0.786461	0.528517	0.276709	0.178082
ENSG00000137831	UACA	uveal autoantigen with coiled-coil domains and ankyrin repeats	The space external to the outermost structure of a cell. For cells without external protective or external encapsulating structures this refers to space outside of the plasma membrane. This term covers the host cell environment outside an intracellular parasite. [GOC:go_curators];"A series of molecular signals which triggers the apoptotic death of a cell. The pathway starts with reception of a si…	.	1974	2412	2061	1416	760	2420	2270	1831	2096	1752	3734	3619	3494	6812	4785	6561	1698	1691	1699	0.253656	0.173108	0.331079	1.41986	0.178841	1.60148e-13	-1.27425	0.169085	5.52224e-12	0.489902	0.329636	0.30572
ENSG00000123178	SPRYD7	SPRY domain containing 7	Interacting selectively and non-covalently with any protein or protein complex (a complex of two or more proteins that may include other nonprotein molecules). [GOC:go_curators]	.	251	288	280	117	69	230	267	223	218	158	402	386	344	722	477	711	384	410	369	0.23536	0.114842	0.150971	1.41509	0.12644	1.29333e-26	-0.176591	0.102507	0.228184	0.637076	0.236886	0.0467452
ENSG00000178773	CPNE7	copine 7	The directed movement of substances (such as macromolecules, small molecules, ions) or cellular components (such as complexes and organelles) into, out of or within a cell, or between cells, or within a multicellular organism by means of some agent such as a transporter, pore or motor protein. [GOC:dos, GOC:dph, GOC:jl, GOC:mah];"The membrane surrounding a cell that separates the cell from its ex…	.	36	47	49	14	9	26	28	28	41	16	63	44	34	83	87	92	26	14	18	0.0931028	0.279733	0.841651	1.4091	0.233412	5.64761e-08	-1.5953	0.301705	4.33031e-06	0.413026	0.386522	0.471277
ENSG00000101166	PRELID3B	PRELI domain containing 3B	A semiautonomous, self replicating organelle that occurs in varying numbers, shapes, and sizes in the cytoplasm of virtually all eukaryotic cells. It is notably the site of tissue respiration. [GOC:giardia, ISBN:0198506732];"The region between the inner and outer lipid bilayers of the mitochondrial envelope." [GOC:mah];"Enables the directed movement of phosphatidic acid into, out of or within a c…	.	1699	2091	1816	1216	715	1873	2455	2011	2168	1534	2982	3028	3223	6133	4403	6211	3449	3649	3328	0.130743	0.199147	0.679246	1.40787	0.203746	2.55432e-10	-0.141255	0.195135	0.647358	0.620225	0.249733	0.0698559
ENSG00000184432	COPB2	coatomer protein complex subunit beta 2	The directed movement of substances within the Golgi, mediated by small transport vesicles. These either fuse with the cis-Golgi or with each other to form the membrane stacks known as the cis-Golgi reticulum (network). [ISBN:0716731363];"Any of the vesicles of the constitutive secretory pathway, which carry cargo from the endoplasmic reticulum to the Golgi, between Golgi cisternae, from the Golg…	.	4595	5301	4611	2490	1457	5094	5540	4546	4834	3545	5436	5986	6051	14365	10455	13737	11998	12358	12106	-0.163094	0.145064	0.471848	1.40292	0.147315	2.48636e-19	0.443896	0.138866	0.0122044	0.690928	0.22535	0.0207641
ENSG00000136868	SLC31A1	solute carrier family 31 member 1	A prelysosomal endocytic organelle differentiated from early endosomes by lower lumenal pH and different protein composition. Late endosomes are more spherical than early endosomes and are mostly juxtanuclear, being concentrated near the microtubule organizing center. [NIF_Subcellular:nlx_subcell_20090702, PMID:11964142, PMID:2557062];"The directed movement of copper ions from outside of a cell i…	Autosomal Recessive Mental Retardation	1389	1525	1379	448	237	1116	1590	1415	1398	1033	1450	1531	1496	3664	2925	3556	2211	2203	1989	-0.197312	0.227978	0.590606	1.39498	0.230205	4.95675e-08	-0.136643	0.22971	0.705428	0.545463	0.272785	0.157004
ENSG00000121440	PDZRN3	PDZ domain containing ring finger 3	Catalysis of the joining of two substances, or two groups within a single molecule, with the concomitant hydrolysis of the diphosphate bond in ATP or a similar triphosphate. [EC:6, GOC:mah];"Catalysis of the transfer of ubiquitin from one protein to another via the reaction X-Ub + Y --> Y-Ub + X, where both X-Ub and Y-Ub are covalent linkages." [GOC:BioGRID, GOC:jh2, PMID:9635407];"The process in…	.	829	886	785	420	231	1119	1261	882	1049	750	956	868	885	2650	2052	2783	4090	4625	4146	-0.476408	0.225019	0.134718	1.39489	0.226167	2.66036e-08	1.29081	0.222649	3.13193e-07	0.926312	0.275414	0.00999247
ENSG00000100564	PIGH	phosphatidylinositol glycan anchor biosynthesis class H	The irregular network of unit membranes, visible only by electron microscopy, that occurs in the cytoplasm of many eukaryotic cells. The membranes form a complex meshwork of tubular channels, which are often expanded into slitlike cavities called cisternae. The ER takes two forms, rough (or granular), with ribosomes adhering to the outer surface, and smooth (with no ribosomes attached). [ISBN:019…	.	273	291	285	101	66	318	299	267	305	188	620	641	668	775	564	776	1019	884	889	0.820532	0.172815	6.64775e-05	1.38424	0.177554	4.78672e-13	0.903835	0.171148	4.45707e-06	1.05526	0.135359	4.51746e-12
ENSG00000125848	FLRT3	.	.	.	949	1071	1050	427	259	882	1330	1080	1136	795	2028	2147	2387	2918	2191	2943	4787	5073	5273	0.659254	0.201907	0.0110869	1.38328	0.203154	4.96606e-10	1.40944	0.200096	1.61392e-10	1.18572	0.162605	1.38011e-10
ENSG00000176018	LYSMD3	LysM domain containing 3	The component of a membrane consisting of the gene products and protein complexes having at least some part of their peptide sequence embedded in the hydrophobic region of the membrane. [GOC:dos, GOC:go_curators]	.	510	593	588	469	289	630	730	521	678	497	1173	1170	1270	1947	1451	1934	1931	2042	1803	0.397136	0.242186	0.267686	1.3791	0.244855	5.22165e-07	0.622586	0.237882	0.0495593	0.856618	0.200151	0.000587378
ENSG00000070495	JMJD6	arginine demethylase and lysine hydroxylase	Combining with an extracellular or intracellular messenger to initiate a change in cell activity. [GOC:ceb, ISBN:0198506732];"Interacting selectively and non-covalently with an identical protein or proteins." [GOC:jl];"The process whose specific outcome is the progression of a blood vessel over time, from its formation to the mature structure. The blood vessel is the vasculature carrying blood." …	positive regulation of mRNA splicing via spliceosome	452	488	428	145	101	384	394	315	358	279	477	490	500	1015	840	1004	1031	957	832	-0.0416441	0.107055	0.814679	1.35489	0.102535	5.08051e-37	0.445186	0.105557	0.000442395	0.695203	0.205309	0.00949867
ENSG00000118596	SLC16A7	solute carrier family 16 member 7	Enables the active transport of a solute across a membrane by a mechanism whereby two or more species are transported together in the same direction in a tightly coupled process not directly linked to a form of energy other than chemiosmotic energy. [GOC:mtg_transport, ISBN:0815340729, PMID:10839820];"The directed movement of lactate across a membrane by means of some agent such as a transporter …	lactate transmembrane transport	96	108	78	42	40	90	136	101	121	69	220	220	239	282	222	287	66	59	49	0.701466	0.230644	0.0199999	1.35334	0.22897	1.15451e-07	-1.67048	0.251946	2.39429e-09	0.545969	0.365899	0.303685
ENSG00000198018	ENTPD7	ectonucleoside triphosphate diphosphohydrolase 7	The component of a membrane consisting of the gene products and protein complexes having at least some part of their peptide sequence embedded in the hydrophobic region of the membrane. [GOC:dos, GOC:go_curators];"Catalysis of the hydrolysis of various bonds, e.g. C-O, C-N, C-C, phosphoric anhydride bonds, etc. Hydrolase is the systematic name for any enzyme of EC class 3." [ISBN:0198506732];"Int…	.	589	641	649	190	125	410	500	421	419	332	495	502	546	1297	1043	1280	804	820	803	-0.308849	0.126043	0.0745476	1.35061	0.122914	1.17244e-25	-0.109333	0.119977	0.562709	0.502447	0.255063	0.1638
ENSG00000104219	ZDHHC2	zinc finger DHHC-type containing 2	The irregular network of unit membranes, visible only by electron microscopy, that occurs in the cytoplasm of many eukaryotic cells. The membranes form a complex meshwork of tubular channels, which are often expanded into slitlike cavities called cisternae. The ER takes two forms, rough (or granular), with ribosomes adhering to the outer surface, and smooth (with no ribosomes attached). [ISBN:019…	.	1161	1413	1143	451	269	963	970	712	851	582	1813	1855	2014	2646	1905	2646	1357	1453	1350	0.570554	0.0838478	1.41172e-09	1.34299	0.0962805	2.53151e-41	-0.330131	0.0794139	0.000554649	0.669449	0.225391	0.0260084
ENSG00000111711	GOLT1B	golgi transport 1B	The component of a membrane consisting of the gene products and protein complexes having at least some part of their peptide sequence embedded in the hydrophobic region of the membrane. [GOC:dos, GOC:go_curators];"The irregular network of unit membranes, visible only by electron microscopy, that occurs in the cytoplasm of many eukaryotic cells. The membranes form a complex meshwork of tubular cha…	positive regulation of I-kappaB kinase/NF-kappaB signaling;signal transducer activity	1558	1739	1570	684	383	1091	1180	888	1063	775	1642	1840	1710	3377	2476	3515	1706	1889	1721	0.0635838	0.104056	0.702312	1.34224	0.113912	1.71237e-29	-0.353239	0.0991039	0.00420834	0.523213	0.246208	0.129238
ENSG00000138600	SPPL2A	signal peptide peptidase like 2A	The lipid bilayer surrounding a late endosome. [GOC:pz];"A prelysosomal endocytic organelle differentiated from early endosomes by lower lumenal pH and different protein composition. Late endosomes are more spherical than early endosomes and are mostly juxtanuclear, being concentrated near the microtubule organizing center." [NIF_Subcellular:nlx_subcell_20090702, PMID:11964142, PMID:2557062];"The…	negative regulation of immune response;membrane protein intracellular domain proteolysis	698	735	663	318	214	595	805	612	774	562	1167	1182	1053	1820	1501	1894	1727	1932	1775	0.284416	0.168847	0.252844	1.33083	0.167564	1.56919e-13	0.508138	0.164022	0.0158764	0.770478	0.181583	0.000672407
ENSG00000134970	TMED7	transmembrane p24 trafficking protein 7	The component of a membrane consisting of the gene products and protein complexes having at least some part of their peptide sequence embedded in the hydrophobic region of the membrane. [GOC:dos, GOC:go_curators];"The irregular network of unit membranes, visible only by electron microscopy, that occurs in the cytoplasm of many eukaryotic cells. The membranes form a complex meshwork of tubular cha…	.	1872	2144	1836	1165	688	1510	2251	1850	2020	1500	3262	3447	3256	5449	3993	5640	3642	3929	3512	0.306929	0.181821	0.251708	1.32841	0.18701	6.88606e-11	0.0129257	0.177749	0.967677	0.653656	0.216302	0.0231084
ENSG00000137845	ADAM10	ADAM metallopeptidase domain 10	The external part of the cell wall and/or plasma membrane. [GOC:jl, GOC:mtg_sensu, GOC:sm];"Any vesicle associated with the Golgi complex and involved in mediating transport within the Golgi or between the Golgi and other parts of the cell." [GOC:mah];"The proteolytic cleavage of transmembrane proteins and release of their ectodomain (extracellular domain)." [GOC:jl, http://www.copewithcytokines.…	metallopeptidase activity;Reticulate acropigmentation of Kitamura;ALZHEIMER DISEASE 18;positive regulation of cell migration;positive regulation of T cell chemotaxis;monocyte activation;positive regulation of cell growth;positive regulation of cell proliferation;positive regulation of membrane protein ectodomain proteolysis;metalloendopeptidase activity;PMA-inducible membrane protein ectodomain p…	4161	4974	4461	1822	1047	3939	4091	3400	3766	3009	5511	5342	5418	11298	7888	10246	6487	6781	6297	0.0427027	0.102571	0.800905	1.32645	0.114605	1.88662e-28	-0.142628	0.100381	0.33831	0.552789	0.227672	0.0775864
ENSG00000143878	RHOB	ras homolog family member B	A series of molecular signals within the cell that are mediated by a member of the Rho family of proteins switching to a GTP-bound active state. [GOC:bf];"The attachment of a cell, either to another cell or to an underlying substrate such as the extracellular matrix, via cell adhesion molecules." [GOC:hb, GOC:pf];"The lipid bilayer surrounding an endosome." [GOC:mah];"A lipid bilayer along with a…	positive regulation of cytokinesis;endothelial tube morphogenesis;canonical Wnt signaling pathway involved in positive regulation of endothelial cell migration;positive regulation of apoptotic process	1139	1328	1178	309	164	876	1299	762	912	571	1123	896	869	2262	1995	2637	9561	9236	7782	-0.344961	0.222335	0.299255	1.32299	0.217576	4.42139e-08	2.36327	0.215862	2.92884e-25	1.42924	0.335265	0.000626905
ENSG00000159479	MED8	mediator complex subunit 8	Any process involved in the assembly of the RNA polymerase II preinitiation complex (PIC) at an RNA polymerase II promoter region of a DNA template, resulting in the subsequent synthesis of RNA from that promoter. The initiation phase includes PIC assembly and the formation of the first few bonds in the RNA chain, including abortive initiation, which occurs when the first few nucleotides are repe…	.	872	858	784	233	126	670	719	615	500	408	702	844	908	1668	1300	1753	1630	1683	1651	-0.0438826	0.181641	0.887711	1.32183	0.176102	4.01218e-12	0.514822	0.172054	0.0208979	0.699016	0.212456	0.0119272
ENSG00000162104	ADCY9	adenylate cyclase 9	The living contents of a cell; the matter contained within (but not including) the plasma membrane, usually taken to exclude large vacuoles and masses of secretory or ingested material. In eukaryotes it includes the nucleus and cytoplasm. [ISBN:0198506732];"The cellular process in which a signal is conveyed to trigger a change in the activity or state of a cell. Signal transduction begins with re…	adenylate cyclase-activating adrenergic receptor signaling pathway	211	204	225	63	34	151	144	121	143	99	241	193	228	367	423	339	386	406	290	0.094291	0.15549	0.704725	1.31098	0.169395	7.31835e-13	0.344913	0.154207	0.102821	0.680398	0.209071	0.0130632
ENSG00000164442	CITED2	Cbp/p300 interacting transactivator with Glu/Asp rich carboxy-terminal domain 2	The process in which a relatively unspecialized hemopoietic precursor cell acquires the specialized features of a leukocyte. A leukocyte is an achromatic cell of the myeloid or lymphoid lineages capable of ameboid movement, found in blood or other tissue. [CL:0000738, GOC:add, PMID:16551264];"The establishment of an organism's body plan or part of an organism with respect to the left and right ha…	Single ventricular septal defect;negative regulation of transcription DNA-templated;negative regulation of transcription from RNA polymerase II promoter in response to UV-induced DNA damage;RNA polymerase II transcription corepressor activity;Atrial septal defect sinus venosus type;TETRALOGY OF FALLOT;cellular response to fluid shear stress;negative regulation of cell migration;Atrioventricular s…	628	686	613	169	120	476	470	285	324	203	862	713	656	1107	950	1117	2018	1932	1719	0.36511	0.19027	0.185155	1.30574	0.183054	5.61821e-11	1.24986	0.180675	3.76833e-10	1.02609	0.176264	7.52298e-07
ENSG00000169860	P2RY1	purinergic receptor P2Y1	The external part of the cell wall and/or plasma membrane. [GOC:jl, GOC:mtg_sensu, GOC:sm];"Combining with adenosine and transmitting the signal to a heterotrimeric G-protein complex to initiate a change in cell activity, activated by ADP." [GOC:mah];"Combining with an extracellular or intracellular messenger to initiate a change in cell activity." [GOC:ceb, ISBN:0198506732];"Interacting selectiv…	.	461	496	422	277	164	627	464	359	418	331	872	946	975	1305	966	1218	1009	1033	946	0.553526	0.172553	0.0128994	1.30552	0.173058	3.05468e-12	0.204845	0.16462	0.408722	0.750773	0.185375	0.00129036
ENSG00000013375	PGM3	phosphoglucomutase 3	The process whose specific outcome is the progression of the myeloid and lymphoid derived organ/tissue systems of the blood and other parts of the body over time, from formation to the mature structure. The site of hemopoiesis is variable during development, but occurs primarily in bone marrow or kidney in many adult vertebrates. [GOC:dgh, ISBN:0198506732];"The chemical reactions and pathways inv…	UDP-N-acetylglucosamine biosynthetic process;protein O-linked glycosylation;IMMUNODEFICIENCY 23;PGM3-CDG;protein N-linked glycosylation;phosphoacetylglucosamine mutase activity	2441	2780	2361	1393	766	2873	2998	2448	2672	1935	4219	4347	4228	7133	5337	6972	4982	5242	5083	0.269589	0.159956	0.252667	1.30124	0.162848	1.10605e-13	0.0801537	0.156519	0.747223	0.645403	0.203131	0.0158966
ENSG00000163171	CDC42EP3	CDC42 effector protein 3	Interacting selectively and non-covalently with any protein involved in modulating the reorganization of the cytoskeleton. [GOC:go_curators, PMID:15163540];"Any process that activates or increases the frequency, rate or extent of the assembly of pseudopodia." [GOC:pg];"A series of molecular signals within the cell that are mediated by a member of the Rho family of proteins switching to a GTP-boun…	.	591	644	582	191	132	254	519	462	439	260	577	602	588	1186	1009	1149	435	487	459	-0.0464622	0.201063	0.892934	1.29787	0.201357	4.94422e-09	-0.844418	0.203276	0.000561281	0.396349	0.297593	0.364014
ENSG00000071889	FAM3A	family with sequence similarity 3 member A	Elemental activities, such as catalysis or binding, describing the actions of a gene product at the molecular level. A given gene product may exhibit one or more molecular functions. [GOC:go_curators];"The part of a cell or its extracellular environment in which a gene product is located. A gene product may be located in one or more parts of a cell and its location may be as specific as a particu…	.	144	151	127	56	40	211	204	139	162	125	417	287	256	425	297	424	670	571	504	0.607063	0.255717	0.0860991	1.29058	0.239098	1.78566e-06	1.01548	0.234456	0.000287749	0.996976	0.177517	1.96414e-06
ENSG00000118855	MFSD1	major facilitator superfamily domain containing 1	The component of a membrane consisting of the gene products and protein complexes having at least some part of their peptide sequence embedded in the hydrophobic region of the membrane. [GOC:dos, GOC:go_curators];"The process in which a solute is transported across a lipid bilayer, from one side of a membrane to the other" [GOC:dph, GOC:jid]	.	388	459	430	196	141	479	572	398	496	344	437	535	504	1192	893	1200	1198	1325	1150	-0.294495	0.190198	0.300447	1.27719	0.185912	3.3261e-10	0.558719	0.17987	0.015537	0.63644	0.230167	0.0400585
ENSG00000153113	CAST	calpastatin	The irregular network of unit membranes, visible only by electron microscopy, that occurs in the cytoplasm of many eukaryotic cells. The membranes form a complex meshwork of tubular channels, which are often expanded into slitlike cavities called cisternae. The ER takes two forms, rough (or granular), with ribosomes adhering to the outer surface, and smooth (with no ribosomes attached). [ISBN:019…	Peeling skin-leukonuchia-acral punctate keratoses-cheilitis-knuckle pads syndrome;PEELING SKIN WITH LEUKONYCHIA ACRAL PUNCTATE KERATOSES CHEILITIS AND KNUCKLE PADS	2281	2696	2544	1198	691	1975	1868	1627	1562	1110	3998	3921	3858	5451	3981	5099	6033	6396	6347	0.540289	0.114989	8.14376e-05	1.27513	0.122512	4.64857e-23	0.763363	0.11133	5.64725e-10	0.884175	0.129367	2.46921e-09
ENSG00000006042	TMEM98	transmembrane protein 98	The component of a membrane consisting of the gene products and protein complexes having at least some part of their peptide sequence embedded in the hydrophobic region of the membrane. [GOC:dos, GOC:go_curators];"The irregular network of unit membranes, visible only by electron microscopy, that occurs in the cytoplasm of many eukaryotic cells. The membranes form a complex meshwork of tubular cha…	Nanophthalmos 4;Nanophthalmia	1524	1510	1340	413	232	1264	1176	1002	1058	660	1819	1905	1731	2903	2136	2982	2625	2614	2606	0.291175	0.157059	0.203189	1.27358	0.163453	4.94304e-13	0.363908	0.156882	0.0891787	0.710117	0.1801	0.00181813
ENSG00000142186	SCYL1	SCY1 like pseudokinase 1	The cellular synthesis of RNA on a template of DNA. [GOC:jl, GOC:txnOH];"An intracellular structure that can catalyze gamma-tubulin-dependent microtubule nucleation and that can anchor microtubules by interacting with their minus ends, plus ends or sides." [GOC:vw, http://en.wikipedia.org/wiki/Microtubule_organizing_center, ISBN:0815316194, PMID:17072892, PMID:17245416];"The phosphorylation of pe…	Episodes of Liver Failure Peripheral Neuropathy Cerebellar Atrophy and Ataxia;SPINOCEREBELLAR ATAXIA AUTOSOMAL RECESSIVE 21	782	757	725	201	138	692	967	711	672	437	618	468	505	1714	1429	1702	2051	1734	1601	-0.738567	0.232678	0.0140145	1.27255	0.225413	4.88837e-07	0.542401	0.228995	0.0812758	0.562583	0.280135	0.155148
ENSG00000204152	TIMM23B	translocase of inner mitochondrial membrane 23 homolog B	Enables the energy-independent facilitated diffusion, mediated by passage of proteins through a transmembrane aqueous pore or channel. [GOC:rb];"Primary active carrier-mediated transport of a protein across a membrane, driven by the hydrolysis of the diphosphate bond of inorganic pyrophosphate, ATP, or another nucleoside triphosphate. The transport protein may or may not be transiently phosphoryl…	.	241	254	214	76	45	171	205	168	192	134	149	151	150	505	397	467	291	265	268	-0.759841	0.140528	3.30004e-06	1.27087	0.127641	4.11448e-21	-0.344958	0.127177	0.0405678	0.332674	0.293367	0.441712
ENSG00000167460	TPM4	tropomyosin 4	Interacting selectively and non-covalently with calcium ions (Ca2+). [GOC:ai];"A two-stranded helical polymer of the protein actin." [GOC:mah];"A lipid bilayer along with all the proteins and protein complexes embedded in it an attached to it." [GOC:dos, GOC:mah, ISBN:0815316194];"A contractile actin filament bundle that consists of short actin filaments with alternating polarity, cross-linked by…	Inflammatory myofibroblastic tumor	7898	8851	8143	5162	3077	6001	10893	8544	9380	5979	10938	11482	10478	23475	17311	23052	14491	14970	13374	-0.102268	0.209583	0.765711	1.2702	0.213111	8.77731e-08	-0.172696	0.20655	0.597459	0.485607	0.249886	0.169839
ENSG00000076258	FMO4	flavin containing monooxygenase 4	The component of a membrane consisting of the gene products and protein complexes having at least some part of their peptide sequence embedded in the hydrophobic region of the membrane. [GOC:dos, GOC:go_curators];"The chemical reactions and pathways resulting in the breakdown of a drug, a substance used in the diagnosis, treatment or prevention of a disease." [GOC:go_curators];"The chemical react…	.	45	44	33	21	16	32	30	30	30	22	62	82	59	85	66	102	46	74	80	0.51983	0.226214	0.0989871	1.26716	0.21385	1.06658e-07	0.0569517	0.239986	0.888701	0.66093	0.230991	0.032905
ENSG00000131459	GFPT2	glutamine-fructose-6-phosphate transaminase 2	The chemical reactions and pathways involving fructose 6-phosphate, also known as F6P. The D-enantiomer is an important intermediate in glycolysis, gluconeogenesis, and fructose metabolism. [ISBN:0198506732];"The chemical reactions and pathways involving UDP-N-acetylglucosamine, a substance composed of N-acetylglucosamine, a common structural unit of oligosaccharides, in glycosidic linkage with u…	.	1795	1818	1785	495	296	1303	1214	1053	1082	763	2287	2174	2164	3408	2428	3251	1537	1403	1421	0.382479	0.14286	0.046627	1.26638	0.151989	7.26955e-15	-0.665449	0.146349	0.00012217	0.520612	0.258579	0.153936
ENSG00000162407	PLPP3	phospholipid phosphatase 3	The process whose specific outcome is the progression of a blood vessel over time, from its formation to the mature structure. The blood vessel is the vasculature carrying blood. [GOC:hjd, UBERON:0001981];"Catalysis of the reaction: a phospholipid + H2O = a lipid + phosphate." [GOC:jl];"The attachment of a cell, either to another cell or to an underlying substrate such as the extracellular matrix…	canonical Wnt signaling pathway involved in positive regulation of cell-cell adhesion;canonical Wnt signaling pathway involved in positive regulation of wound healing;canonical Wnt signaling pathway involved in positive regulation of endothelial cell migration	668	689	618	200	131	572	585	510	486	311	1008	1091	1172	1405	1001	1388	2191	2269	2229	0.620138	0.129639	5.74648e-05	1.2647	0.134903	1.00072e-18	1.19868	0.121488	1.58359e-20	1.0523	0.126206	7.84184e-14
ENSG00000198964	SGMS1	sphingomyelin synthase 1	Any process that results in a change in state or activity of a cell (in terms of movement, secretion, enzyme production, gene expression, etc.) as a result of a tumor necrosis factor stimulus. [GOC:mah];"Any process that increases the frequency, rate or extent of gene expression. Gene expression is the process in which a gene's coding sequence is converted into a mature gene product or products (…	.	878	889	783	357	193	734	971	846	816	564	906	889	1030	2083	1617	2030	1974	1871	1848	-0.180231	0.169367	0.498646	1.26437	0.166696	2.26684e-12	0.374129	0.163159	0.0933736	0.599419	0.217426	0.0407187
ENSG00000187772	LIN28B	lin-28 homolog B	Any molecular function by which a gene product interacts selectively and non-covalently with DNA (deoxyribonucleic acid). [GOC:dph, GOC:jl, GOC:tb, GOC:vw];"A small, dense body one or more of which are present in the nucleus of eukaryotic cells. It is rich in RNA and protein, is not bounded by a limiting membrane, and is not seen during mitosis. Its prime function is the transcription of the nucl…	pre-miRNA processing;RNA 3'-end processing;Neuroblastoma;miRNA catabolic process	8599	10049	8870	5410	3147	8623	9508	7435	8307	5693	6858	7232	7069	23383	17217	23282	9986	10087	9269	-0.752281	0.135368	1.61984e-06	1.26309	0.13994	2.19887e-17	-0.733796	0.128004	4.44442e-07	0.248186	0.309566	0.604445
ENSG00000147155	EBP	emopamil binding protein (sterol isomerase)	The process whose specific outcome is the progression of the myeloid and lymphoid derived organ/tissue systems of the blood and other parts of the body over time, from formation to the mature structure. The site of hemopoiesis is variable during development, but occurs primarily in bone marrow or kidney in many adult vertebrates. [GOC:dgh, ISBN:0198506732];"The chemical reactions and pathways res…	MEND syndrome;CHONDRODYSPLASIA PUNCTATA 2 X-LINKED DOMINANT;X-linked dominant chondrodysplasia punctata;Chondrodysplasia Punctata 2 X-Linked;Digital anomalies-intellectual disability-short stature syndrome	1370	1427	1189	582	276	1291	1285	999	1122	721	1301	1521	1509	3020	2300	2906	2972	2711	2508	-0.0965464	0.120213	0.62152	1.25893	0.116107	5.43839e-25	0.367332	0.112453	0.010045	0.611533	0.200906	0.0219133
ENSG00000118495	PLAGL1	PLAG1 like zinc finger 1	The synthesis of RNA from a DNA template by RNA polymerase II, originating at an RNA polymerase II promoter. Includes transcription of messenger RNA (mRNA) and certain small nuclear RNAs (snRNAs). [GOC:jl, GOC:txnOH, ISBN:0321000382];"That part of the nuclear content other than the chromosomes or the nucleolus." [GOC:ma, ISBN:0124325653];"Any process that activates or increases the frequency, rat…	Transient neonatal diabetes mellitus;DIABETES MELLITUS TRANSIENT NEONATAL 1;Paternal uniparental disomy of chromosome 6	245	271	310	154	86	285	262	258	265	174	209	218	223	611	736	548	481	501	462	-0.723698	0.15811	0.000135502	1.25651	0.178024	9.41418e-11	-0.0303802	0.143696	0.902212	0.384865	0.278666	0.345574
ENSG00000196968	FUT11	fucosyltransferase 11	The component of a membrane consisting of the gene products and protein complexes having at least some part of their peptide sequence embedded in the hydrophobic region of the membrane. [GOC:dos, GOC:go_curators];"The covalent attachment of a fucosyl group to an acceptor molecule." [CHEBI:62688, GOC:sart, PMID:19948734];"The lipid bilayer surrounding any of the thin, flattened compartments that f…	.	448	495	459	177	90	326	264	211	274	207	571	615	484	842	631	874	744	832	819	0.336186	0.160329	0.139465	1.25447	0.159063	2.4056e-13	0.405659	0.151579	0.0439338	0.720651	0.174896	0.00102326
ENSG00000145604	SKP2	S-phase kinase-associated protein 2, E3 ubiquitin protein ligase	The mitotic cell cycle transition by which a cell in G2 commits to M phase. The process begins when the kinase activity of M cyclin/CDK complex reaches a threshold high enough for the cell cycle to proceed. This is accomplished by activating a positive feedback loop that results in the accumulation of unphosphorylated and active M cyclin/CDK complex. [GOC:mtg_cell_cycle];"Interacting selectively …	.	3949	4809	4303	2235	1353	5059	3976	3122	3579	2302	4391	4526	4503	10233	7927	10272	7241	7348	7007	-0.258258	0.124252	0.143432	1.25321	0.126413	6.23828e-21	-0.0241274	0.117645	0.904967	0.472562	0.231906	0.148284
ENSG00000138448	ITGAV	integrin subunit alpha V	The external part of the cell wall and/or plasma membrane. [GOC:jl, GOC:mtg_sensu, GOC:sm];"A process in which a calcium ion is transported from one side of a membrane to the other by means of some agent such as a transporter or pore." [GOC:mah];"The process whose specific outcome is the progression of a blood vessel over time, from its formation to the mature structure. The blood vessel is the v…	cell-substrate adhesion;negative regulation of lipoprotein metabolic process;negative regulation of lipid transport;negative regulation of lipid storage;cell-matrix adhesion;positive regulation of viral entry into host cell;cell growth;heterotypic cell-cell adhesion;apolipoprotein A-I-mediated signaling pathway;endodermal cell differentiation;negative regulation of low-density lipoprotein particl…	1722	1934	1761	1235	691	2345	2703	2153	2552	1917	2808	3076	3217	6146	4247	5950	5298	5570	4922	-0.00240852	0.241191	0.995647	1.25251	0.245805	7.8797e-06	0.335027	0.238852	0.345116	0.623148	0.22466	0.0393962
ENSG00000085117	CD82	CD82 molecule	Interacting selectively and non-covalently with any protein or protein complex (a complex of two or more proteins that may include other nonprotein molecules). [GOC:go_curators];"The membrane surrounding a cell that separates the cell from its external environment. It consists of a phospholipid bilayer and associated proteins." [ISBN:0716731363];"A membrane-bounded vesicle that is released into t…	PROSTATE CANCER	98	105	111	30	40	71	55	53	58	32	104	126	116	186	172	171	409	331	303	0.209117	0.242907	0.592603	1.25104	0.235335	2.68018e-06	1.33199	0.228205	2.53021e-07	0.995074	0.218776	0.000224877
ENSG00000168374	ARF4	ADP ribosylation factor 4	Interacting selectively and non-covalently with the epidermal growth factor receptor. [GOC:ai];"Any process that results in a change in state or activity of a cell or an organism (in terms of movement, secretion, enzyme production, gene expression, etc.) as a result of an axon injury stimulus." [GOC:dgh, GOC:dph, GOC:jid, GOC:lm];"A lipid bilayer along with all the proteins and protein complexes …	.	2611	2850	2671	859	417	2321	2342	1897	2226	1307	2874	2962	3048	5430	4213	5506	4810	4727	4673	0.054726	0.159353	0.836986	1.25076	0.163535	1.43243e-12	0.278835	0.160433	0.223406	0.618374	0.198358	0.018433
ENSG00000106052	TAX1BP1	Tax1 binding protein 1	Any process that stops, prevents, or reduces the frequency, rate or extent of cell death by apoptotic process. [GOC:jl, GOC:mtg_apoptosis];"Interacting selectively and non-covalently with any metal ion." [GOC:ai];"Interacting selectively and non-covalently with a kinase, any enzyme that catalyzes the transfer of a phosphate group." [GOC:jl];"Any process that stops, prevents, or reduces the freque…	.	2634	3144	2762	1756	1000	2149	2721	2411	2418	1868	3953	4413	4028	7140	5284	6964	5096	5570	5336	0.178838	0.16536	0.490586	1.25053	0.167859	6.00134e-12	0.0988539	0.159264	0.692076	0.599524	0.202748	0.0269152
ENSG00000147383	NSDHL	.	.	CHILD SYNDROME	834	831	854	247	138	789	657	595	648	370	1136	1342	1253	1603	1377	1641	1897	1895	1898	0.506815	0.160148	0.01435	1.25042	0.157236	1.46318e-13	0.664001	0.156017	0.000385289	0.840506	0.145052	8.55032e-07
ENSG00000049246	PER3	period circadian clock 3	The cellular synthesis of RNA on a template of DNA. [GOC:jl, GOC:txnOH];"Any process that modulates the frequency, rate or extent of gene expression such that an expression pattern recurs with a regularity of approximately 24 hours." [GOC:mah];"A membrane-bounded organelle of eukaryotic cells in which chromosomes are housed and replicated. In most cells, the nucleus contains all of the cell's chr…	protein stabilization;regulation of circadian sleep/wake cycle sleep;ADVANCED SLEEP PHASE SYNDROME FAMILIAL 3;FAMILIAL ADVANCED SLEEP-PHASE SYNDROME	185	198	233	61	41	117	175	178	167	125	176	228	227	417	365	399	379	391	351	-0.0798595	0.208444	0.817572	1.24964	0.195254	6.57248e-09	0.290026	0.192123	0.302125	0.590363	0.222733	0.0507734
ENSG00000176142	TMEM39A	.	.	.	1055	1128	948	384	238	819	1074	921	945	633	1103	1257	1338	2356	1846	2303	2040	2037	2045	0.00314481	0.146784	0.990685	1.24709	0.141668	1.57186e-16	0.277457	0.138252	0.149014	0.602745	0.198953	0.022702
ENSG00000088256	GNA11	G protein subunit alpha 11	The cellular process in which a signal is conveyed to trigger a change in the activity or state of a cell. Signal transduction begins with reception of a signal (e.g. a ligand binding to a receptor or receptor activation by a stimulus such as light), or for signal transduction in the absence of ligand, signal-withdrawal or the activity of a constitutively active receptor. Signal transduction ends…	Uveal melanoma;Congenital Hemangioma;Autosomal dominant hypocalcemia;Familial hypocalciuric hypercalcemia type 2	684	723	583	219	123	759	634	367	441	311	518	371	421	1287	1052	1428	1770	1320	1172	-0.691946	0.187992	0.00329741	1.24664	0.175864	7.62478e-11	0.539966	0.188932	0.0288969	0.554147	0.266176	0.138206
ENSG00000106803	SEC61B	Sec61 translocon beta subunit	The component of a membrane consisting of the gene products and protein complexes having at least some part of their peptide sequence embedded in the hydrophobic region of the membrane. [GOC:dos, GOC:go_curators];"The irregular network of unit membranes, visible only by electron microscopy, that occurs in the cytoplasm of many eukaryotic cells. The membranes form a complex meshwork of tubular cha…	negative regulation of retrograde protein transport ER to cytosol;negative regulation of protein import into nucleus translocation	1035	1134	970	355	221	1401	1211	819	966	757	1262	1291	1213	2444	2000	2569	2472	2502	2220	-0.0743982	0.199634	0.822342	1.24427	0.200432	2.08956e-08	0.400491	0.198381	0.146365	0.62121	0.212394	0.029009
ENSG00000095380	NANS	N-acetylneuraminate synthase	All of the contents of a cell excluding the plasma membrane and nucleus, but including other subcellular structures. [ISBN:0198547684];"The chemical reactions and pathways resulting in the formation of lipopolysaccharides, any of a group of related, structurally complex components of the outer membrane of Gram-negative bacteria." [GOC:ai, GOC:mr];"Catalysis of the reaction: phosphoenolpyruvate + …	SPONDYLOEPIMETAPHYSEAL DYSPLASIA GENEVIEVE TYPE	719	813	715	333	212	814	1117	839	884	614	645	690	687	2078	1568	2108	1782	1695	1652	-0.674117	0.215317	0.0157326	1.24014	0.215993	2.90611e-07	0.201986	0.212131	0.542873	0.452408	0.27166	0.247819
ENSG00000117143	UAP1	UDP-N-acetylglucosamine pyrophosphorylase 1	The chemical reactions and pathways involving UDP-N-acetylglucosamine, a substance composed of N-acetylglucosamine, a common structural unit of oligosaccharides, in glycosidic linkage with uridine diphosphate. [GOC:ai];"Interacting selectively and non-covalently with an identical protein or proteins." [GOC:jl];"Catalysis of the reaction: N-acetyl-alpha-D-glucosamine 1-phosphate + UTP = diphosphat…	.	1192	1236	1104	552	290	1461	1199	1081	1099	790	1716	1849	1934	2874	2309	2833	2234	2261	2092	0.262124	0.151723	0.239086	1.23786	0.149655	1.19712e-14	0.0723542	0.145983	0.755919	0.610405	0.193606	0.0168492
ENSG00000242247	ARFGAP3	ADP ribosylation factor GTPase activating protein 3	A cellular transport process in which transported substances are moved in membrane-bounded vesicles; transported substances are enclosed in the vesicle lumen or located in the vesicle membrane. The process begins with a step that directs a substance to the forming vesicle, and includes vesicle budding and coating. Vesicles are then targeted to, and fuse with, an acceptor membrane. [GOC:ai, GOC:ma…	.	966	995	959	498	266	838	982	881	931	688	1453	1579	1578	2428	1767	2340	2009	1976	1799	0.305403	0.137017	0.112169	1.23785	0.1409	1.82068e-16	0.181695	0.130886	0.351143	0.645204	0.181437	0.00594175
ENSG00000173295	FAM86B3P	.	.	.	93	63	64	23	14	58	45	40	31	39	119	116	107	125	114	130	239	263	185	0.682651	0.228064	0.0225032	1.22961	0.225106	1.28727e-06	1.2287	0.220163	9.91178e-07	1.06741	0.161286	8.72385e-09
ENSG00000074695	LMAN1	lectin, mannose binding 1	The addition of COPII proteins and adaptor proteins to ER membranes during the formation of transport vesicles, forming a vesicle coat. [GOC:ascb_2009, GOC:dph, GOC:jid, GOC:mah, GOC:tb, ISBN:0716731363, PMID:10219233];"A lipid bilayer along with all the proteins and protein complexes embedded in it an attached to it." [GOC:dos, GOC:mah, ISBN:0815316194];"Interacting selectively and non-covalentl…	FACTOR V AND FACTOR VIII COMBINED DEFICIENCY OF 1;positive regulation of organelle organization;Golgi organization;Combined deficiency of factor V and factor VIII	4718	5420	4854	2928	1672	5695	6856	5754	6421	4640	7938	8543	8402	15272	10551	14843	10701	11273	10543	0.102459	0.211699	0.768024	1.22831	0.217688	4.96498e-07	0.0388555	0.20973	0.914099	0.559654	0.220569	0.0630315
ENSG00000185129	PURA	purine rich element binding protein A	Antagonizes the ribosome-mediated translation of mRNA into a polypeptide via direct binding (through a selective and non-covalent interaction) to nucleic acid. [GOC:clt, GOC:vw];"The cellular synthesis of RNA on a template of DNA." [GOC:jl, GOC:txnOH];"Any process that activates or increases the rate or extent of cell proliferation." [GOC:go_curators];"Interacting selectively and non-covalently w…	Intellectual disability;Mental retardation autosomal dominant 31;Severe neonatal hypotonia-seizures-encephalopathy syndrome due to 5q31.3 microdeletion;PURA-related severe neonatal hypotonia-seizures-encephalopathy syndrome due to a point mutation	214	257	267	131	74	145	176	169	191	128	296	353	278	480	433	500	353	407	316	0.178161	0.178331	0.529678	1.22005	0.168189	2.42685e-11	-0.057578	0.16856	0.837688	0.537438	0.216516	0.070024
ENSG00000148296	SURF6	surfeit 6	A cellular process that results in the biosynthesis of constituent macromolecules, assembly, and arrangement of constituent parts of ribosome subunits; includes transport to the sites of protein synthesis. [GOC:ma];"A structure found in the nucleolus, which contains nearly completed preribosomal particles destined for the cytoplasm." [PMID:10754561];"Any molecular function by which a gene product…	.	824	900	864	462	304	1076	1250	755	954	747	601	585	624	2339	1866	2426	1710	1561	1355	-1.06144	0.194146	2.51836e-06	1.21938	0.192483	9.74983e-09	-0.175022	0.191242	0.560811	0.286682	0.30688	0.536875
ENSG00000152700	SAR1B	secretion associated Ras related GTPase 1B	The addition of COPII proteins and adaptor proteins to ER membranes during the formation of transport vesicles, forming a vesicle coat. [GOC:ascb_2009, GOC:dph, GOC:jid, GOC:mah, GOC:tb, ISBN:0716731363, PMID:10219233];"Catalysis of the reaction: GTP + H2O = GDP + phosphate." [ISBN:0198547684];"The lipid bilayer surrounding any of the thin, flattened compartments that form the central portion of …	CHYLOMICRON RETENTION DISEASE	1048	1144	1048	288	198	890	854	677	738	645	1352	1365	1376	2067	1609	2099	1705	1686	1607	0.292622	0.145385	0.160344	1.21936	0.149862	3.50503e-14	0.129968	0.144999	0.569795	0.625057	0.1859	0.0100108
ENSG00000175416	CLTB	clathrin light chain B	The network of interconnected tubular and cisternal structures located within the Golgi apparatus on the side distal to the endoplasmic reticulum, from which secretory vesicles emerge. The trans-Golgi network is important in the later stages of protein secretion where it is thought to play a key role in the sorting and targeting of secreted proteins to the correct destination. [GOC:vw, ISBN:08153…	.	375	411	346	144	88	486	515	393	357	302	494	376	295	929	748	1021	1156	1017	838	-0.403482	0.238311	0.25047	1.21817	0.21708	5.82303e-07	0.495221	0.219449	0.0995388	0.571851	0.248914	0.0974873
ENSG00000241529	RN7SL767P	.	.	.	56	62	49	21	20	52	60	46	40	57	50	58	46	125	114	136	111	115	93	-0.477965	0.254214	0.195991	1.21799	0.225756	1.80289e-06	0.106444	0.224308	0.767138	0.425813	0.270721	0.277473
ENSG00000137563	GGH	gamma-glutamyl hydrolase	Catalysis of the removal of terminal peptide residues that are substituted, cyclized or linked by isopeptide bonds (peptide linkages other than those of alpha-carboxyl to alpha-amino groups). [EC:3.4.19.-];"A closed structure, found only in eukaryotic cells, that is completely surrounded by unit membrane and contains liquid material. Cells contain one or several vacuoles, that may have different …	Methotrexate toxicity or dose selection	766	845	740	491	271	1294	992	816	860	749	1803	2010	2109	2333	1763	2334	2482	2800	2627	0.66681	0.222616	0.0224337	1.21665	0.223385	1.39187e-06	0.638346	0.219267	0.0255747	0.865658	0.158807	4.35674e-06
ENSG00000117475	BLZF1	basic leucine zipper nuclear factor 1	A cellular transport process in which transported substances are moved in membrane-bounded vesicles; transported substances are enclosed in the vesicle lumen or located in the vesicle membrane. The process begins with a step that directs a substance to the forming vesicle, and includes vesicle budding and coating. Vesicles are then targeted to, and fuse with, an acceptor membrane. [GOC:ai, GOC:ma…	.	587	627	600	288	148	584	541	456	461	370	878	869	883	1308	1002	1358	1234	1285	1226	0.297745	0.0930967	0.0131931	1.20951	0.100133	5.47882e-31	0.356333	0.0844766	0.000442118	0.672669	0.158346	0.00066316
ENSG00000109083	IFT20	intraflagellar transport 20	A ciliary basal body that is part of a kinocilium. [GO_REF:0000064, GOC:cilia, GOC:krc, GOC:TermGenie, PMID:15855039, PMID:15882574];"A structure at the distal end of a dendrite adapted to carry out a specific function, e.g. dendriole." [GOC:jl, NIF_Subcellular:sao28175134];"Any process in which a centrosome is transported to, and/or maintained in, a specific location within the cell." [GOC:ai];"…	protein localization to Golgi apparatus;cilium assembly	320	276	301	81	56	250	208	141	170	144	303	380	349	513	431	536	530	551	493	0.258846	0.17025	0.311012	1.20941	0.162098	5.54458e-12	0.41263	0.156964	0.0485718	0.685612	0.175522	0.00204281
ENSG00000151414	NEK7	NIMA related kinase 7	The division of the cytoplasm and the plasma membrane of a cell and its partitioning into two daughter cells. [GOC:mtg_cell_cycle];"An intracellular structure that can catalyze gamma-tubulin-dependent microtubule nucleation and that can anchor microtubules by interacting with their minus ends, plus ends or sides." [GOC:vw, http://en.wikipedia.org/wiki/Microtubule_organizing_center, ISBN:081531619…	positive regulation of telomere maintenance via telomerase;positive regulation of telomere capping;positive regulation of telomerase activity	561	670	555	279	183	520	621	481	583	426	711	810	834	1378	1079	1437	1305	1356	1345	0.0532233	0.135784	0.813018	1.20826	0.13256	1.00395e-17	0.368197	0.124319	0.0225814	0.614376	0.18389	0.0105474
ENSG00000177700	POLR2L	RNA polymerase II subunit L	The extension of an RNA molecule after transcription initiation and promoter clearance at an RNA polymerase II promoter by the addition of ribonucleotides catalyzed by RNA polymerase II. [GOC:mah, GOC:txnOH];"Addition of the 7-methylguanosine cap to the 5' end of a nascent messenger RNA transcript." [GOC:mah, PMID:9266685];"Any process that modulates the frequency, rate or extent of transcription…	.	468	451	405	174	119	599	601	362	375	376	317	193	142	1066	920	1103	1227	946	839	-1.42297	0.259285	2.26001e-06	1.20746	0.20576	1.44741e-07	0.287534	0.215489	0.371326	0.36095	0.337046	0.470308
ENSG00000113621	TXNDC15	thioredoxin domain containing 15	The component of a membrane consisting of the gene products and protein complexes having at least some part of their peptide sequence embedded in the hydrophobic region of the membrane. [GOC:dos, GOC:go_curators];"The basic structural and functional unit of all organisms. Includes the plasma membrane and any external encapsulating structures such as the cell wall and cell envelope." [GOC:go_curat…	.	1245	1377	1211	328	198	612	988	770	813	537	1160	1172	1282	2125	1680	2240	2137	2444	2291	0.0389309	0.192511	0.906148	1.20316	0.196121	3.2338e-08	0.508852	0.194365	0.0495207	0.656973	0.195068	0.00992216
ENSG00000023572	GLRX2	glutaredoxin 2	That part of the nuclear content other than the chromosomes or the nucleolus. [GOC:ma, ISBN:0124325653];"Any process in which DNA is protected from damage by, for example, oxidative stress." [GOC:jl];"Interacting selectively and non-covalently with any metal ion." [GOC:ai];"Catalysis of the reaction: arsenate + reduced glutaredoxin = arsenite + oxidized glutaredoxin. Glutaredoxin functions as the…	.	154	190	177	95	40	204	142	112	132	90	129	196	177	386	302	354	257	271	191	-0.277685	0.189238	0.33025	1.20085	0.158831	2.71056e-12	-0.218494	0.168415	0.387028	0.392464	0.254077	0.286884
ENSG00000167004	PDIA3	protein disulfide isomerase family A member 3	The external part of the cell wall and/or plasma membrane. [GOC:jl, GOC:mtg_sensu, GOC:sm];"Catalysis of the reaction: substrate with reduced sulfide groups = substrate with oxidized disulfide bonds." [MetaCyc:DISULFOXRED-RXN];"The cellular process in which a signal is conveyed to trigger a change in the activity or state of a cell. Signal transduction begins with reception of a signal (e.g. a li…	.	2820	3274	3059	822	556	2249	2307	1739	2096	1569	2031	2073	2139	5631	4558	5171	4976	5080	4683	-0.527141	0.134424	0.00151528	1.20029	0.13758	3.0084e-16	0.254134	0.134334	0.178642	0.467907	0.237827	0.164412
ENSG00000260630	SNAI3-AS1	.	.	.	81	77	67	19	11	43	54	61	45	40	87	79	91	121	126	131	148	148	131	0.204836	0.224777	0.569805	1.19405	0.216812	1.02208e-06	0.479042	0.204275	0.0851845	0.681147	0.196676	0.00767182
ENSG00000058262	SEC61A1	Sec61 translocon alpha 1 subunit	Any process that results in a change in state or activity of a cell or an organism (in terms of movement, secretion, enzyme production, gene expression, etc.) as a result of an interferon-gamma stimulus. Interferon-gamma is also known as type II interferon. [GOC:add, ISBN:0126896631, PMID:15546383];"A series of molecular signals mediated by the endoplasmic reticulum stress sensor IRE1 (Inositol-r…	endoplasmic reticulum organization;cell growth;SRP-dependent cotranslational protein targeting to membrane;posttranslational protein targeting to membrane;Autosomal-Dominant Tubulo-Interstitial and Glomerulocystic Kidney Disease with Anemia	6201	5971	5768	1375	874	5617	4786	3993	3699	2676	4554	4417	4542	10723	8667	10637	12385	11752	11064	-0.378018	0.201887	0.198039	1.19081	0.204841	1.94827e-07	0.537314	0.20449	0.0487141	0.576093	0.231488	0.0691311
ENSG00000121578	B4GALT4	beta-1,4-galactosyltransferase 4	The component of a membrane consisting of the gene products and protein complexes having at least some part of their peptide sequence embedded in the hydrophobic region of the membrane. [GOC:dos, GOC:go_curators];"The chemical reactions and pathways resulting in the formation of keratan sulfate, a glycosaminoglycan with repeat units consisting of beta-1,4-linked D-galactopyranosyl-beta-(1,4)-N-ac…	.	621	635	563	282	177	568	714	616	701	457	814	907	928	1598	1110	1508	965	972	864	0.0963187	0.176481	0.735523	1.18957	0.179697	1.68063e-09	-0.272513	0.171421	0.272535	0.467169	0.230027	0.149815
ENSG00000157916	RER1	retention in endoplasmic reticulum sorting receptor 1	The external part of the cell wall and/or plasma membrane. [GOC:jl, GOC:mtg_sensu, GOC:sm];"Any process that increases the frequency, rate or extent of the directed movement of a protein to a specific location in the plasma membrane." [GOC:dph, GOC:tb];"The membrane surrounding a cell that separates the cell from its external environment. It consists of a phospholipid bilayer and associated prote…	.	1341	1299	1204	309	190	1170	1364	1079	1112	774	1127	1151	1212	2673	2015	2660	2767	2589	2415	-0.29493	0.231	0.40573	1.18869	0.234326	8.80505e-06	0.393777	0.232858	0.237548	0.548573	0.235442	0.0926658
ENSG00000165915	SLC39A13	solute carrier family 39 member 13	The component of a membrane consisting of the gene products and protein complexes having at least some part of their peptide sequence embedded in the hydrophobic region of the membrane. [GOC:dos, GOC:go_curators];"A process in which a zinc II ion is transported from one side of a membrane to the other by means of some agent such as a transporter or pore." [GOC:BHF, GOC:mah];"Cytoplasm situated ne…	SPONDYLOEPIMETAPHYSEAL DYSPLASIA WITH ABNORMAL DENTITION;SPONDYLOCHEIRODYSPLASIA EHLERS-DANLOS SYNDROME-LIKE;connective tissue development;Ehlers-Danlos syndrome-like spondylocheirodysplasia (SCD-EDS);Ehlers-Danlos syndrome spondylocheiro dysplastic type	148	140	139	37	28	119	167	122	113	75	246	149	158	297	235	291	620	540	490	0.187528	0.229982	0.615365	1.18658	0.191815	2.37752e-08	1.29762	0.18712	3.38941e-10	0.964421	0.207027	0.000149426
ENSG00000110841	PPFIBP1	PPFIA binding protein 1	Any cadherin binding that occurs as part of the process of cell-cell adhesion. [GOC:dos];"The attachment of one cell to another cell via adhesion molecules." [GOC:dos];"The membrane surrounding a cell that separates the cell from its external environment. It consists of a phospholipid bilayer and associated proteins." [ISBN:0716731363];"The attachment of a cell, either to another cell or to an un…	.	947	1066	1161	283	189	585	887	793	956	600	1150	1172	1245	2046	1649	1915	1068	1095	1002	0.104431	0.202469	0.750174	1.1833	0.205229	2.54139e-07	-0.513454	0.20406	0.060867	0.423834	0.253558	0.245725
ENSG00000163902	RPN1	ribophorin I	The component of a membrane consisting of the gene products and protein complexes having at least some part of their peptide sequence embedded in the hydrophobic region of the membrane. [GOC:dos, GOC:go_curators];"Interacting non-covalently with a poly(A) RNA, a RNA molecule which has a tail of adenine bases." [GOC:jl];"The lipid bilayer surrounding the endoplasmic reticulum." [GOC:mah];"A lipid …	protein N-linked glycosylation via asparagine;Acute myeloid leukemia with inv3(p21;q26.2) or t(3;3)(p21;q26.2)	6857	7103	6160	2977	1678	7379	8813	7354	7070	4730	8466	8565	9102	16745	12993	16752	17255	16849	16619	-0.0712291	0.188915	0.8203	1.18265	0.190441	2.06954e-08	0.42913	0.187396	0.0938795	0.598727	0.200625	0.0251849
ENSG00000173418	NAA20	N(alpha)-acetyltransferase 20, NatB catalytic subunit	All of the contents of a cell excluding the plasma membrane and nucleus, but including other subcellular structures. [ISBN:0198547684];"The living contents of a cell; the matter contained within (but not including) the plasma membrane, usually taken to exclude large vacuoles and masses of secretory or ingested material. In eukaryotes it includes the nucleus and cytoplasm." [ISBN:0198506732];"A me…	.	598	695	602	297	185	734	623	494	583	433	595	738	670	1452	1111	1508	1174	1247	1157	-0.27183	0.134578	0.158686	1.17832	0.128187	5.03915e-18	0.111262	0.118313	0.5482	0.461398	0.218487	0.131748
ENSG00000055211	GINM1	glycoprotein integral membrane 1	The component of a membrane consisting of the gene products and protein complexes having at least some part of their peptide sequence embedded in the hydrophobic region of the membrane. [GOC:dos, GOC:go_curators];"A membrane-bounded vesicle that is released into the extracellular region by fusion of the limiting endosomal membrane of a multivesicular body with the plasma membrane. Extracellular e…	.	421	485	385	275	158	595	626	495	507	406	747	755	781	1285	965	1243	1350	1428	1297	0.141323	0.221487	0.68783	1.17676	0.222653	3.12222e-06	0.521661	0.21732	0.0763067	0.671245	0.191238	0.00675607
ENSG00000168282	MGAT2	mannosyl (alpha-1,6-)-glycoprotein beta-1,2-N-acetylglucosaminyltransferase	The component of a membrane consisting of the gene products and protein complexes having at least some part of their peptide sequence embedded in the hydrophobic region of the membrane. [GOC:dos, GOC:go_curators];"The set of thin, flattened membrane-bounded compartments, called cisternae, that form the central portion of the Golgi complex. The stack usually comprises cis, medial, and trans cister…	MGAT2-CDG syndrome;congenital disorder of glycosylation type 2A (CDG2A);CONGENITAL DISORDER OF GLYCOSYLATION TYPE IIa	1070	1254	1082	628	392	1501	1245	940	1059	771	1434	1285	1349	2848	2026	2976	2220	2396	2105	-0.192788	0.156142	0.423116	1.1767	0.16188	2.20011e-11	0.077747	0.148901	0.741922	0.47036	0.218308	0.123237
ENSG00000145817	YIPF5	Yip1 domain family member 5	The component of a membrane consisting of the gene products and protein complexes having at least some part of their peptide sequence embedded in the hydrophobic region of the membrane. [GOC:dos, GOC:go_curators];"The directed movement of proteins into, out of or within a cell, or between cells, by means of some agent such as a transporter or pore." [GOC:ai];"A cellular transport process in which…	.	1374	1594	1383	612	335	1430	1505	1252	1334	943	1736	1923	2075	3134	2454	3385	3538	3723	3618	0.0988201	0.133471	0.650774	1.17388	0.132764	1.12114e-16	0.56947	0.124863	0.000115186	0.67293	0.167472	0.00143006
ENSG00000114850	SSR3	signal sequence receptor subunit 3	The component of a membrane consisting of the gene products and protein complexes having at least some part of their peptide sequence embedded in the hydrophobic region of the membrane. [GOC:dos, GOC:go_curators];"The targeting of proteins to a membrane that occurs during translation and is dependent upon two key components, the signal-recognition particle (SRP) and the SRP receptor. SRP is a cyt…	.	7362	8125	6849	3051	1700	6121	7858	6536	6935	5180	8650	9196	8987	16526	12419	16745	13647	14822	13888	-0.0211183	0.146113	0.934295	1.173	0.150658	5.16144e-13	0.184643	0.144867	0.396211	0.535755	0.195794	0.0423771
ENSG00000073712	FERMT2	fermitin family member 2	The component of a plasma membrane consisting of gene products and protein complexes that are loosely bound to its cytoplasmic surface, but not integrated into the hydrophobic region. [GOC:mah];"The external part of the cell wall and/or plasma membrane." [GOC:jl, GOC:mtg_sensu, GOC:sm];"The aggregation, arrangement and bonding together of an integrin, a heterodimeric adhesion receptor formed by t…	Wnt signaling pathway;negative regulation of transforming growth factor beta receptor signaling pathway;integrin-mediated signaling pathway;cell-matrix adhesion;integrin activation	2839	3110	2887	1473	845	1978	4095	3377	3776	2538	3461	3612	3351	7583	5979	7686	6110	6111	5744	-0.266787	0.244359	0.486108	1.16975	0.247531	4.26058e-05	0.0592767	0.244714	0.885798	0.451657	0.245547	0.196884
ENSG00000241852	C8orf58	chromosome 8 open reading frame 58	.	.	157	152	141	65	37	164	130	127	142	57	234	241	281	342	241	300	801	812	774	0.50366	0.174849	0.0295948	1.15871	0.173849	1.2698e-09	1.70387	0.151716	1.39665e-26	1.19189	0.193308	1.1942e-07
ENSG00000115520	COQ10B	coenzyme Q10B	The inner, i.e. lumen-facing, lipid bilayer of the mitochondrial envelope. It is highly folded to form cristae. [GOC:ai]	.	359	428	380	141	82	354	488	329	409	264	527	530	554	803	699	919	610	602	544	0.141591	0.18517	0.640014	1.15725	0.186486	2.11765e-08	-0.18364	0.183314	0.521196	0.483851	0.219635	0.113548
ENSG00000142279	WTIP	.	.	.	214	244	205	85	78	339	299	172	192	148	212	171	150	538	408	563	987	958	850	-0.749744	0.227116	0.00999222	1.15619	0.212183	1.37498e-06	1.15897	0.204022	5.83308e-07	0.728878	0.283817	0.0593975
ENSG00000134375	TIMM17A	translocase of inner mitochondrial membrane 17 homolog A (yeast)	Enables the energy-independent facilitated diffusion, mediated by passage of proteins through a transmembrane aqueous pore or channel. [GOC:rb];"Primary active carrier-mediated transport of a protein across a membrane, driven by the hydrolysis of the diphosphate bond of inorganic pyrophosphate, ATP, or another nucleoside triphosphate. The transport protein may or may not be transiently phosphoryl…	.	1819	2026	1654	729	429	2029	2006	1434	1731	1249	1616	1868	1884	4005	3204	4064	2761	2816	2607	-0.347288	0.148547	0.0920874	1.1497	0.144685	1.5239e-13	-0.193247	0.141064	0.358048	0.36147	0.238081	0.295293
ENSG00000112210	RAB23	RAB23, member RAS oncogene family	The directed movement of proteins into, out of or within a cell, or between cells, by means of some agent such as a transporter or pore. [GOC:ai];"The formation of a double membrane-bounded structure, the autophagosome, that occurs when a specialized membrane sac, called the isolation membrane, starts to enclose a portion of the cytoplasm." [GOC:autophagy, PMID:9412464];"The lipid bilayer surroun…	CARPENTER SYNDROME 1;autophagosome assembly;CARPENTER SYNDROME;cellular defense response;craniofacial suture morphogenesis;cilium assembly;acrocephalopolysyndactyly type 2;negative regulation of transcription factor import into nucleus	1260	1371	1282	879	484	1701	1621	1308	1411	1037	2704	2855	2834	3516	2633	3545	3270	3232	3103	0.504284	0.188077	0.0463219	1.14197	0.190895	7.74287e-08	0.253168	0.183234	0.353663	0.677751	0.168005	0.00136045
ENSG00000120437	ACAT2	acetyl-CoA acetyltransferase 2	All of the contents of a cell excluding the plasma membrane and nucleus, but including other subcellular structures. [ISBN:0198547684];"A membrane-bounded organelle of eukaryotic cells in which chromosomes are housed and replicated. In most cells, the nucleus contains all of the cell's chromosomes except the organellar chromosomes, and is the site of RNA synthesis and processing. In some species,…	ACETYL-CoA ACETYLTRANSFERASE-2 DEFICIENCY	7318	8253	7120	3049	1832	6714	3690	2726	3210	2312	4215	4790	4629	12100	9837	12288	12594	11839	11582	-0.589299	0.245501	0.0820284	1.14031	0.24868	7.82051e-05	0.340077	0.245243	0.351668	0.452627	0.260403	0.22472
ENSG00000167695	FAM57A	family with sequence similarity 57 member A	The component of a membrane consisting of the gene products and protein complexes having at least some part of their peptide sequence embedded in the hydrophobic region of the membrane. [GOC:dos, GOC:go_curators];"The membrane surrounding a cell that separates the cell from its external environment. It consists of a phospholipid bilayer and associated proteins." [ISBN:0716731363]	.	235	283	248	84	52	285	268	229	233	155	241	264	294	574	433	516	826	845	720	-0.215521	0.179263	0.436793	1.13919	0.171702	1.53189e-09	0.900667	0.164467	1.68989e-06	0.70977	0.211375	0.0101144
ENSG00000105854	PON2	.	.	Amyotrophic lateral sclerosis	2204	2346	2188	720	415	1798	1562	1274	1331	927	2005	2092	2064	3820	2977	3842	6782	7188	6859	-0.079076	0.11864	0.67907	1.13915	0.123425	3.7035e-18	1.22108	0.117892	1.29222e-22	0.854657	0.196862	0.000470356
ENSG00000164211	STARD4	StAR related lipid transfer domain containing 4	A membrane-bounded vesicle found in the cytoplasm of the cell. [GOC:ai, GOC:mah];"Interacting selectively and non-covalently with cholesterol (cholest-5-en-3-beta-ol); the principal sterol of vertebrates and the precursor of many steroids, including bile acids and steroid hormones." [GOC:jl, ISBN:0198506732];"Any process that increases the frequency, rate or extent of cholesterol esterification. …	.	2470	2925	2620	918	574	2132	1838	1387	1746	1319	4150	4203	4090	4559	3851	4660	5897	5928	5154	0.630807	0.097149	9.43542e-09	1.13905	0.100728	3.72861e-27	0.626175	0.0979795	1.05782e-08	0.814245	0.104663	4.89151e-12
ENSG00000131018	SYNE1	spectrin repeat containing nuclear envelope protein 1	That part of the nuclear content other than the chromosomes or the nucleolus. [GOC:ma, ISBN:0124325653];"Either of the lipid bilayers that surround the nucleus and form the nuclear envelope; excludes the intermembrane space." [GOC:mah, GOC:pz];"The process in which a relatively unspecialized cell acquires specialized features of a muscle cell." [CL:0000187, GOC:go_curators];"The process in which …	Emery-Dreifuss muscular dystrophy 4 autosomal dominant;Emery-Dreifuss muscular dystrophy 4 autosomal recessive;Autosomal recessive ataxia Beauce type;Autosomal recessive myogenic arthrogryposis multiplex congenita;SPINOCEREBELLAR ATAXIA AUTOSOMAL RECESSIVE 8;Autosomal dominant Emery-Dreifuss muscular dystrophy	1427	1636	1475	587	374	980	1144	1051	1202	884	2019	2169	2228	2802	2553	2592	5536	5785	5322	0.381314	0.108881	0.00558213	1.13129	0.111951	9.6992e-22	1.30199	0.102396	3.3986e-34	0.977699	0.146302	5.93265e-09
ENSG00000143753	DEGS1	delta 4-desaturase, sphingolipid 1	The irregular network of unit membranes, visible only by electron microscopy, that occurs in the cytoplasm of many eukaryotic cells. The membranes form a complex meshwork of tubular channels, which are often expanded into slitlike cavities called cisternae. The ER takes two forms, rough (or granular), with ribosomes adhering to the outer surface, and smooth (with no ribosomes attached). [ISBN:019…	.	1682	1992	1762	666	412	1528	1247	955	1045	741	1347	1289	1380	3178	2424	3121	2411	2399	2373	-0.420859	0.117327	0.00437941	1.12637	0.121083	1.89121e-18	-0.0354586	0.113422	0.851888	0.369937	0.228425	0.262521
ENSG00000092531	SNAP23	synaptosome associated protein 23	The directed movement of proteins into, out of or within a cell, or between cells, by means of some agent such as a transporter or pore. [GOC:ai];"That part of the nuclear content other than the chromosomes or the nucleolus." [GOC:ma, ISBN:0124325653];"The part of a synapse that is part of the presynaptic cell." [GOC:dos];"The directed movement of substances from the Golgi to other parts of the c…	histamine secretion by mast cell	1432	1646	1372	803	492	1563	2004	1581	1825	1317	1283	1344	1255	3856	2934	3969	2967	2937	2785	-0.755123	0.200274	0.00246991	1.1248	0.202275	7.63366e-07	-0.055504	0.196573	0.866957	0.306369	0.269869	0.441168
ENSG00000067064	IDI1	isopentenyl-diphosphate delta isomerase 1	Catalysis of the hydrolysis of various bonds, e.g. C-O, C-N, C-C, phosphoric anhydride bonds, etc. Hydrolase is the systematic name for any enzyme of EC class 3. [ISBN:0198506732];"A small organelle enclosed by a single membrane, and found in most eukaryotic cells. Contains peroxidases and other enzymes involved in a variety of metabolic processes including free radical detoxification, lipid cata…	.	4041	4858	4109	1916	1075	4116	2989	2287	2774	1996	4265	5049	4717	8104	5951	8141	7978	8729	8121	0.0343729	0.12889	0.87521	1.12354	0.131803	1.51691e-15	0.404801	0.120745	0.00789756	0.583837	0.171915	0.00929543
ENSG00000134046	MBD2	methyl-CpG binding domain protein 2	The ordered and organized complex of DNA, protein, and sometimes RNA, that forms the chromosome. [GOC:elh, PMID:20404130];"That part of the nuclear content other than the chromosomes or the nucleolus." [GOC:ma, ISBN:0124325653];"Repression of transcription of ribosomal DNA by altering the structure of chromatin." [PMID:10219245];"Any process that modulates the frequency, rate or extent of cell pr…	.	448	466	424	215	128	414	580	488	515	368	583	546	577	1077	892	1081	1234	1113	1137	-0.140056	0.198892	0.663429	1.12214	0.197372	3.95982e-07	0.432271	0.195361	0.107343	0.554332	0.203493	0.0434431
ENSG00000130340	SNX9	sorting nexin 9	Interacting selectively and non-covalently with any inositol-containing glycerophospholipid, i.e. phosphatidylinositol (PtdIns) and its phosphorylated derivatives. [GOC:bf, ISBN:0198506732, PMID:11395417];"Interacting selectively and non-covalently with a ubiquitin protein ligase enzyme, any of the E3 proteins." [GOC:vp];"A cell cycle process that results in the division of the cytoplasm of a cel…	intracellular protein transport;mitotic cytokinesis;endosomal transport;negative regulation of endocytosis;receptor-mediated endocytosis of low-density lipoprotein particle involved in cholesterol transport;cleavage furrow formation	587	608	600	296	173	641	625	588	556	376	853	830	883	1355	1056	1363	1445	1323	1337	0.133593	0.135982	0.536753	1.12128	0.135947	1.43067e-14	0.359757	0.130415	0.036563	0.592505	0.165575	0.00557768
ENSG00000121989	ACVR2A	activin A receptor type 2A	The external part of the cell wall and/or plasma membrane. [GOC:jl, GOC:mtg_sensu, GOC:sm];"The establishment of an organism's body plan or part of an organism with respect to the left and right halves. The pattern can either be symmetric, such that the halves are mirror images, or asymmetric where the pattern deviates from this symmetry." [GOC:dph, GOC:jid];"Combining with activin and transmitti…	positive regulation of bone mineralization;activin receptor signaling pathway;cellular response to BMP stimulus;positive regulation of protein phosphorylation;BMP signaling pathway;positive regulation of osteoblast differentiation;positive regulation of pathway-restricted SMAD protein phosphorylation;positive regulation of transcription from RNA polymerase II promoter	859	979	927	264	178	477	647	487	571	386	1917	2107	1832	1500	1183	1435	1053	1143	1004	1.1871	0.154093	3.26031e-12	1.1191	0.156769	5.42658e-11	-0.126351	0.15372	0.604205	0.828264	0.208838	0.00169752
ENSG00000182827	ACBD3	acyl-CoA binding domain containing 3	The component of a membrane consisting of the gene products and protein complexes having at least some part of their peptide sequence embedded in the hydrophobic region of the membrane. [GOC:dos, GOC:go_curators];"Interacting selectively and non-covalently with acyl-CoA, any derivative of coenzyme A in which the sulfhydryl group is in thiolester linkage with a fatty acyl group." [GOC:jl, ISBN:019…	.	1234	1440	1368	932	534	1413	1666	1473	1488	1135	1710	1845	1877	3634	2659	3637	2672	2700	2615	-0.169196	0.201895	0.60428	1.11852	0.204785	1.28907e-06	-0.0651135	0.196753	0.843344	0.411696	0.227222	0.204008
ENSG00000160190	SLC37A1	solute carrier family 37 member 1	The component of the endoplasmic reticulum membrane consisting of the gene products and protein complexes having at least some part of their peptide sequence embedded in the hydrophobic region of the membrane. [GOC:dos, GOC:mah];"The directed movement of carbohydrate into, out of or within a cell, or between cells, by means of some agent such as a transporter or pore. Carbohydrates are any of a g…	.	123	169	132	43	31	138	123	89	93	66	201	196	241	258	217	250	152	153	132	0.49625	0.155961	0.0137336	1.11636	0.143795	6.09604e-13	-0.498336	0.14809	0.00760041	0.511373	0.231862	0.113152
ENSG00000132432	SEC61G	Sec61 translocon gamma subunit	The component of a membrane consisting of the gene products and protein complexes having at least some part of their peptide sequence embedded in the hydrophobic region of the membrane. [GOC:dos, GOC:go_curators];"A series of molecular signals mediated by the endoplasmic reticulum stress sensor IRE1 (Inositol-requiring transmembrane kinase/endonuclease). Begins with activation of IRE1 in response…	.	776	948	738	659	376	1116	1052	842	1005	815	1005	1316	1281	2405	1701	2519	1490	1726	1408	-0.173561	0.243795	0.659494	1.11357	0.243521	8.25315e-05	-0.265259	0.236405	0.464491	0.363846	0.252176	0.322663
ENSG00000145391	SETD7	.	.	.	1213	1411	1329	477	288	784	1496	1107	1341	858	1333	1274	1314	2668	2142	2710	2003	2010	1958	-0.247474	0.197229	0.415348	1.11219	0.199443	7.02485e-07	-0.0950854	0.196921	0.762866	0.385759	0.231681	0.247828
ENSG00000115677	HDLBP	high density lipoprotein binding protein	The membrane surrounding a cell that separates the cell from its external environment. It consists of a phospholipid bilayer and associated proteins. [ISBN:0716731363];"Interacting selectively and non-covalently with a lipid." [GOC:ai];"The chemical reactions and pathways involving cholesterol, cholest-5-en-3 beta-ol, the principal sterol of vertebrates and the precursor of many steroids, includi…	.	15859	17039	15593	6140	3455	13976	16167	13886	13712	9007	14783	14949	15977	32707	25478	31769	28573	27822	27618	-0.295761	0.125342	0.0884988	1.11041	0.126782	2.24605e-16	0.128665	0.123624	0.501775	0.429039	0.208348	0.143255
ENSG00000120725	SIL1	SIL1 nucleotide exchange factor	The irregular network of unit membranes, visible only by electron microscopy, that occurs in the cytoplasm of many eukaryotic cells. The membranes form a complex meshwork of tubular channels, which are often expanded into slitlike cavities called cisternae. The ER takes two forms, rough (or granular), with ribosomes adhering to the outer surface, and smooth (with no ribosomes attached). [ISBN:019…	Marinesco-Sjogren syndrome	376	377	360	162	96	475	338	302	286	233	497	403	459	844	567	797	1054	1155	1028	-0.0150184	0.152483	0.955006	1.10954	0.154154	3.54213e-11	0.780412	0.137652	6.18039e-07	0.687617	0.177856	0.00234007
ENSG00000119185	ITGB1BP1	integrin subunit beta 1 binding protein 1	The aggregation, arrangement and bonding together of an integrin, a heterodimeric adhesion receptor formed by the non-covalent association of particular alpha and beta subunits, that lead to the increased affinity of the integrin for its extracellular ligands. [GOC:add, PMID:12213832, PMID:14754902];"Any process that activates or increases the frequency, rate or extent of the assembly of a stress…	.	875	959	807	431	280	1077	603	444	547	431	930	962	1044	1739	1371	1685	1345	1278	1225	-0.0233068	0.193194	0.944688	1.10929	0.192942	2.78256e-07	-0.0835523	0.187584	0.781456	0.43521	0.21573	0.152849
ENSG00000116704	SLC35D1	solute carrier family 35 member D1	The component of a membrane consisting of the gene products and protein complexes having at least some part of their peptide sequence embedded in the hydrophobic region of the membrane. [GOC:dos, GOC:go_curators];"Catalysis of the transfer of a UDP-glucuronic acid from one side of the membrane to the other. UDP-glucuronic acid is a substance composed of glucuronic acid in glycosidic linkage with …	SCHNECKENBECKEN DYSPLASIA	936	1063	969	262	153	558	537	458	530	398	720	700	721	1510	1160	1427	1485	1502	1441	-0.248424	0.183152	0.373024	1.10922	0.187376	1.09965e-07	0.340718	0.182999	0.186926	0.500473	0.210815	0.0857947
ENSG00000134153	EMC7	ER membrane protein complex subunit 7	The component of a membrane consisting of the gene products and protein complexes having at least some part of their peptide sequence embedded in the hydrophobic region of the membrane. [GOC:dos, GOC:go_curators];"Any process specifically pertinent to the functioning of integrated living units: cells, tissues, organs, and organisms. A process is a collection of molecular events with a defined beg…	.	394	440	416	303	162	562	476	439	427	329	571	619	595	1149	810	1088	931	1080	941	-0.0836001	0.203193	0.803297	1.10647	0.205601	1.93083e-06	0.187563	0.198053	0.545123	0.486597	0.208265	0.0915049
ENSG00000169490	TM2D2	TM2 domain containing 2	The component of a membrane consisting of the gene products and protein complexes having at least some part of their peptide sequence embedded in the hydrophobic region of the membrane. [GOC:dos, GOC:go_curators]	.	709	840	761	334	202	815	709	498	584	465	729	899	838	1484	1209	1614	1722	1825	1587	-0.131399	0.112669	0.453272	1.10467	0.104398	7.9893e-24	0.471368	0.0942035	1.63536e-05	0.556831	0.180163	0.0195917
ENSG00000132824	SERINC3	serine incorporator 3	The component of a membrane consisting of the gene products and protein complexes having at least some part of their peptide sequence embedded in the hydrophobic region of the membrane. [GOC:dos, GOC:go_curators];"The directed movement of L-serine, the L-enantiomer of 2-amino-3-hydroxypropanoic acid, into, out of or within a cell, or between cells, by means of some agent such as a transporter or …	.	961	1086	1052	332	205	595	1038	888	905	649	1154	1093	1132	2054	1558	1941	1032	1089	1026	-0.0370626	0.192398	0.910938	1.1029	0.195633	5.07798e-07	-0.585926	0.193141	0.0187232	0.329723	0.252869	0.375372
ENSG00000166579	NDEL1	nudE neurodevelopment protein 1 like 1	Any process that modulates the frequency, rate or extent of microtubule motor activity. [GOC:kmv];"An intracellular structure that can catalyze gamma-tubulin-dependent microtubule nucleation and that can anchor microtubules by interacting with their minus ends, plus ends or sides." [GOC:vw, http://en.wikipedia.org/wiki/Microtubule_organizing_center, ISBN:0815316194, PMID:17072892, PMID:17245416];…	positive regulation of intracellular protein transport;chromosome segregation;positive regulation of GTPase activity	470	533	477	133	83	276	386	304	378	169	507	537	517	818	672	745	678	667	609	0.153255	0.18383	0.605935	1.10186	0.185909	1.05988e-07	0.0252062	0.183545	0.9373	0.507114	0.196518	0.0579096
ENSG00000114670	NEK11	NIMA related kinase 11	The cell cycle process by which a cell commits to entering the next mitotic cell cycle phase. [GOC:mtg_cell_cycle];"A small, dense body one or more of which are present in the nucleus of eukaryotic cells. It is rich in RNA and protein, is not bounded by a limiting membrane, and is not seen during mitosis. Its prime function is the transcription of the nucleolar DNA into 45S ribosomal-precursor RN…	regulation of mitotic cell cycle phase transition;mitotic cell cycle phase transition;histone phosphorylation;G2 DNA damage checkpoint	56	52	37	20	11	23	40	40	38	25	48	60	51	94	85	70	131	151	160	0.026269	0.251655	0.952276	1.10129	0.245804	0.000121634	1.03709	0.219801	5.93942e-05	0.786278	0.218264	0.00519984
ENSG00000167657	DAPK3	death associated protein kinase 3;microRNA 637	Interacting selectively and non-covalently with an identical protein or proteins. [GOC:jl];"A series of molecular signals which triggers the apoptotic death of a cell. The pathway starts with reception of a signal, and ends when the execution phase of apoptosis is triggered." [GOC:mtg_apoptosis];"Any process that modulates the frequency, rate or extent of cell motility." [GOC:mah];"Any process th…	regulation of mitotic cell cycle phase transition;positive regulation of canonical Wnt signaling pathway;retinal cell apoptotic process	661	699	596	225	111	802	737	530	580	440	610	477	447	1315	1093	1415	1558	1268	1128	-0.628355	0.215057	0.0268818	1.10127	0.205044	2.03595e-06	0.26801	0.210975	0.397715	0.406079	0.253881	0.268927
ENSG00000197965	MPZL1	myelin protein zero like 1	The external part of the cell wall and/or plasma membrane. [GOC:jl, GOC:mtg_sensu, GOC:sm];"A series of molecular signals initiated by the binding of an extracellular ligand to a receptor on the surface of the target cell where the receptor possesses tyrosine kinase activity, and ending with regulation of a downstream cellular process, e.g. transcription." [GOC:ceb, GOC:signaling];"Interacting se…	.	2290	2627	2536	707	367	2175	2495	2103	2225	1477	3501	3586	4009	4760	3843	4746	4722	4697	4601	0.404183	0.211481	0.186918	1.10101	0.212875	5.46399e-06	0.292848	0.212078	0.353979	0.643358	0.172764	0.00356588
ENSG00000124786	SLC35B3	solute carrier family 35 member B3	Any host process that results in the promotion of antiviral immune response mechanisms, thereby limiting viral replication. [GOC:add, GOC:dph, GOC:tb, ISBN:0781735149];"The chemical reactions and pathways resulting in the formation of 3'-phosphoadenosine 5'-phosphosulfate, a naturally occurring mixed anhydride. It is an intermediate in the formation of a variety of sulfo compounds in biological s…	positive regulation of defense response to virus by host	387	462	398	208	96	348	351	285	370	275	420	466	425	878	662	782	953	1077	871	-0.156999	0.126282	0.419915	1.09829	0.12641	4.03399e-16	0.531549	0.118585	0.000158611	0.566018	0.186239	0.0221591
ENSG00000051108	HERPUD1	homocysteine inducible ER protein with ubiquitin like domain 1	An ion channel complex through which calcium ions pass. [GOC:mah];"Any process that activates or increases the frequency, rate or extent of ER-associated ubiquitin-dependent protein catabolic process." [GO_REF:0000058, GOC:rph, GOC:TermGenie, PMID:17872946];"The chemical reactions and pathways resulting in the breakdown of a protein or peptide by hydrolysis of its peptide bonds, initiated by the …	positive regulation of ER-associated ubiquitin-dependent protein catabolic process;negative regulation of retrograde protein transport ER to cytosol	649	643	618	187	124	379	552	447	443	319	751	611	665	1068	870	1152	1071	1015	1014	0.0601775	0.15159	0.81057	1.09796	0.148407	8.71702e-12	0.220153	0.143282	0.292562	0.529659	0.180712	0.0286028
ENSG00000153558	FBXL2	F-box and leucine rich repeat protein 2	The chemical reactions and pathways resulting in the breakdown of a protein or peptide by hydrolysis of its peptide bonds, initiated by the covalent attachment of a ubiquitin group, or multiple ubiquitin groups, to the protein. [GOC:go_curators];"A lipid bilayer along with all the proteins and protein complexes embedded in it an attached to it." [GOC:dos, GOC:mah, ISBN:0815316194];"The process in…	negative regulation of autophagy	211	217	184	126	80	275	243	220	229	141	818	801	794	551	383	518	1051	1084	1160	1.38718	0.190753	6.49806e-11	1.09531	0.198594	9.77709e-07	1.39432	0.187708	1.1613e-11	1.30454	0.122708	6.53416e-23
ENSG00000129083	COPB1	coatomer protein complex subunit beta 1	Any vesicle associated with the Golgi complex and involved in mediating transport within the Golgi or between the Golgi and other parts of the cell. [GOC:mah];"A lipid bilayer along with all the proteins and protein complexes embedded in it an attached to it." [GOC:dos, GOC:mah, ISBN:0815316194];"The part of the cytoplasm that does not contain organelles but which does contain other particulate m…	.	4455	5204	4582	1756	976	4774	4930	3902	4262	3143	5746	6462	6537	9868	7295	9990	10362	10649	10348	0.133247	0.150763	0.58177	1.09495	0.153774	6.10969e-11	0.422604	0.147241	0.0280982	0.601975	0.163028	0.00393584
ENSG00000162909	CAPN2	calpain 2	Interacting selectively and non-covalently with calcium ions (Ca2+). [GOC:ai];"A process in which non-proliferating myoblasts fuse to existing fibers or to myotubes to form new fibers. A myoblast is a mononucleate cell type that, by fusion with other myoblasts, gives rise to the myotubes that eventually develop into skeletal muscle fibers." [CL:0000056, GOC:mtg_muscle];"Catalysis of the hydrolysi…	.	2388	2766	2505	1515	827	3378	2321	1983	2160	1425	2847	2953	3118	5871	4314	5609	6507	6662	6462	-0.155505	0.162169	0.5477	1.09364	0.164612	1.44724e-09	0.527334	0.15566	0.00713789	0.566052	0.190376	0.0258491
ENSG00000230148	HOXB-AS1	.	.	.	69	58	64	13	15	43	54	32	40	31	74	84	94	107	87	104	94	115	93	0.419063	0.21586	0.179214	1.09233	0.203424	2.04718e-06	0.228604	0.200135	0.455042	0.61687	0.184878	0.0106246
ENSG00000145740	SLC30A5	solute carrier family 30 member 5	The directed movement of cobalt (Co) ions into, out of or within a cell, or between cells, by means of some agent such as a transporter or pore. [GOC:ai];"A lipid bilayer along with all the proteins and protein complexes embedded in it an attached to it." [GOC:dos, GOC:mah, ISBN:0815316194];"Interacting selectively and non-covalently with zinc (Zn) ions." [GOC:ai];"The lipid bilayer surrounding a…	.	1375	1466	1367	516	289	1277	1825	1365	1584	1142	1614	1736	1762	3257	2358	3199	3324	3251	3115	-0.11042	0.22051	0.758393	1.09086	0.22468	2.40977e-05	0.352848	0.220183	0.267889	0.525196	0.20709	0.0631778
ENSG00000102100	SLC35A2	solute carrier family 35 member A2	The component of a membrane consisting of the gene products and protein complexes having at least some part of their peptide sequence embedded in the hydrophobic region of the membrane. [GOC:dos, GOC:go_curators];"The irregular network of unit membranes, visible only by electron microscopy, that occurs in the cytoplasm of many eukaryotic cells. The membranes form a complex meshwork of tubular cha…	Congenital Disorder of Glycosylation;SLC35A2-CDG;CONGENITAL DISORDER OF GLYCOSYLATION TYPE IIm	297	258	261	68	30	185	281	200	221	140	191	168	183	497	413	428	416	402	402	-0.622104	0.247583	0.0656	1.08885	0.244266	0.000133961	0.0789347	0.242125	0.845137	0.350861	0.267219	0.371278
ENSG00000119523	ALG2	ALG2, alpha-1,3/1,6-mannosyltransferase	The component of a membrane consisting of the gene products and protein complexes having at least some part of their peptide sequence embedded in the hydrophobic region of the membrane. [GOC:dos, GOC:go_curators];"Interacting selectively and non-covalently with a nonidentical protein to form a heterodimer." [GOC:ai];"Interacting selectively and non-covalently with any protein or protein complex (…	calcium-dependent protein binding;CONGENITAL DISORDER OF GLYCOSYLATION TYPE Ii;Congenital myasthenic syndromes with glycosylation defect;MYASTHENIC SYNDROME CONGENITAL 14;ALG2-CDG	837	861	718	271	152	591	761	641	689	448	854	834	852	1570	1144	1502	1577	1590	1665	-0.0716761	0.145505	0.762964	1.08613	0.15086	3.50902e-11	0.402682	0.145413	0.0357949	0.545304	0.18201	0.0244666
ENSG00000141696	P3H4	prolyl 3-hydroxylase family member 4 (non-enzymatic)	A small, dense body one or more of which are present in the nucleus of eukaryotic cells. It is rich in RNA and protein, is not bounded by a limiting membrane, and is not seen during mitosis. Its prime function is the transcription of the nucleolar DNA into 45S ribosomal-precursor RNA, the processing of this RNA into 5.8S, 18S, and 28S components of ribosomal RNA, and the association of these comp…	.	626	683	571	230	167	717	632	493	520	332	731	571	628	1288	999	1252	1904	1825	1664	-0.219479	0.138288	0.28587	1.08522	0.126863	1.20104e-15	0.804881	0.121003	2.10186e-09	0.645127	0.193135	0.0105485
ENSG00000144867	SRPRB	SRP receptor beta subunit	The component of a membrane consisting of the gene products and protein complexes having at least some part of their peptide sequence embedded in the hydrophobic region of the membrane. [GOC:dos, GOC:go_curators];"A series of molecular signals mediated by the endoplasmic reticulum stress sensor IRE1 (Inositol-requiring transmembrane kinase/endonuclease). Begins with activation of IRE1 in response…	.	1895	2076	1957	618	338	1870	1418	1081	1159	782	1769	1846	1909	3259	2568	3257	3460	3415	3474	-0.0604605	0.154181	0.812926	1.08496	0.156743	2.3518e-10	0.390746	0.153941	0.05815	0.543161	0.181204	0.0243855
ENSG00000177731	FLII	FLII, actin remodeling protein	The cellular synthesis of RNA on a template of DNA. [GOC:jl, GOC:txnOH];"The biological process whose specific outcome is the progression of a multicellular organism over time from an initial condition (e.g. a zygote or a young adult) to a later condition (e.g. a multicellular animal or an aged adult)." [GOC:dph, GOC:ems, GOC:isa_complete, GOC:tb];"A process that is carried out at the cellular le…	SMITH-MAGENIS SYNDROME	1963	1941	1759	825	428	2509	2496	1994	2007	1505	2752	2248	2629	4434	3679	4408	6134	5469	5075	-0.0543821	0.215781	0.882423	1.08461	0.213229	8.22871e-06	0.612229	0.213682	0.02842	0.614877	0.19477	0.0166793
ENSG00000067167	TRAM1	translocation associated membrane protein 1	The component of a membrane consisting of the gene products and protein complexes having at least some part of their peptide sequence embedded in the hydrophobic region of the membrane. [GOC:dos, GOC:go_curators];"The irregular network of unit membranes, visible only by electron microscopy, that occurs in the cytoplasm of many eukaryotic cells. The membranes form a complex meshwork of tubular cha…	.	3027	3615	3339	2452	1430	3592	3819	2818	3345	2268	4592	5066	4841	8418	6017	8402	7857	8811	7604	0.00788568	0.196865	0.982003	1.08357	0.201285	1.91804e-06	0.297058	0.191806	0.287608	0.529512	0.191903	0.040504
ENSG00000117525	F3	coagulation factor III, tissue factor	The external part of the cell wall and/or plasma membrane. [GOC:jl, GOC:mtg_sensu, GOC:sm];"The component of a plasma membrane consisting of gene products and protein complexes that penetrate the external side of the plasma membrane only, either directly or via some covalently attached hydrophobic anchor." [GOC:dos, GOC:mah];"Any process that initiates the clotting cascade of blood coagulation, a…	positive regulation of protein kinase B signaling	1210	1310	1172	306	198	802	1303	1005	1163	744	378	326	318	2412	1833	2163	820	719	652	-1.94417	0.234304	3.93152e-14	1.08088	0.232271	5.8365e-05	-1.32065	0.234638	7.71963e-07	-0.0989884	0.400627	0.889304
ENSG00000182718	ANXA2	annexin A2	The external part of the cell wall and/or plasma membrane. [GOC:jl, GOC:mtg_sensu, GOC:sm];"The function of interacting (directly or indirectly) with receptors such that the proportion of receptors in the active form is increased." [GOC:ceb];"Interacting selectively and non-covalently with phospholipids, a class of lipids containing phosphoric acid as a mono- or diester, in the presence of calciu…	positive regulation of receptor activity;phosphatidylinositol-45-bisphosphate binding;membrane budding;membrane raft assembly	9669	9428	7563	3381	1933	9669	9006	8101	8123	5341	5196	5966	6304	18833	13923	18361	17987	17152	17483	-0.886414	0.160982	2.05853e-06	1.08	0.159792	6.9004e-10	0.242767	0.155363	0.282436	0.343795	0.261239	0.370056
ENSG00000134109	EDEM1	ER degradation enhancing alpha-mannosidase like protein 1	Interacting selectively and non-covalently with calcium ions (Ca2+). [GOC:ai];"The conversion of N-linked glycan (N = nitrogen) structures from the initially transferred oligosaccharide to a mature form, by the actions of glycosidases and glycosyltransferases. The early processing steps are conserved and play roles in glycoprotein folding and trafficking." [ISBN:0879695595, PMID:12736198];"The ch…	mannose trimming involved in glycoprotein ERAD pathway;endoplasmic reticulum;positive regulation of retrograde protein transport ER to cytosol;mannosyl-oligosaccharide 12-alpha-mannosidase activity	453	540	577	100	70	349	290	198	259	189	336	375	354	673	656	690	447	524	422	-0.263494	0.242538	0.488404	1.0781	0.244395	0.000162126	-0.331954	0.245913	0.365475	0.314229	0.257314	0.410203
ENSG00000026025	VIM	.	.	CATARACT 30 MULTIPLE TYPES	35610	39757	35940	20912	11321	45034	30552	24931	25184	18252	58707	59655	63134	75275	57827	76554	97057	102982	104568	0.436507	0.161675	0.0443752	1.0759	0.164314	2.64004e-09	0.733757	0.158219	8.39976e-05	0.767942	0.130049	4.78959e-07
ENSG00000147649	MTDH	metadherin	An extremely narrow tubular channel located between adjacent cells. An instance of this is the secretory canaliculi occurring between adjacent parietal cells in the gastric mucosa of vertebrates. [ISBN:0721662544];"A series of molecular signals initiated by the binding of a lipopolysaccharide (LPS) to a receptor on the surface of a target cell, and ending with regulation of a downstream cellular …	lipopolysaccharide-mediated signaling pathway;ligand-dependent nuclear receptor transcription coactivator activity	2817	3251	2836	1214	809	2614	2724	2167	2729	1797	3102	3055	3089	5838	4689	5842	5696	5814	5445	-0.185952	0.0842434	0.116207	1.07224	0.0863581	1.03212e-32	0.236135	0.0791562	0.0213634	0.460598	0.183643	0.0665026
ENSG00000124783	SSR1	signal sequence receptor subunit 1	The component of a membrane consisting of the gene products and protein complexes having at least some part of their peptide sequence embedded in the hydrophobic region of the membrane. [GOC:dos, GOC:go_curators];"The irregular network of unit membranes, visible only by electron microscopy, that occurs in the cytoplasm of many eukaryotic cells. The membranes form a complex meshwork of tubular cha…	.	2931	3388	3300	882	490	2242	2399	1992	2141	1741	3738	3465	3642	5419	4196	5113	4555	4759	4445	0.199921	0.163151	0.427296	1.07143	0.16755	6.76047e-09	0.0920644	0.164568	0.721782	0.519156	0.177931	0.0293093
ENSG00000162368	CMPK1	cytidine/uridine monophosphate kinase 1	The chemical reactions and pathways resulting in the formation of UMP, uridine monophosphate. [ISBN:0198506732];"Catalysis of the reaction: ATP + uridine = ADP + UMP." [EC:2.7.1.48];"Catalysis of the reaction: ATP + (d)UMP = ADP + (d)UDP." [GOC:go_curators];"The part of the cytoplasm that does not contain organelles but which does contain other particulate matter, such as protein complexes." [GOC…	.	2092	2518	2195	1152	679	1963	1270	851	1064	804	2228	2305	2316	3930	2874	3837	2938	3001	2757	0.0200473	0.243079	0.962099	1.07057	0.248806	0.000251574	-0.0847524	0.242057	0.832542	0.429186	0.225585	0.179892
ENSG00000135272	MDFIC	MyoD family inhibitor domain containing	The cellular synthesis of RNA on a template of DNA. [GOC:jl, GOC:txnOH];"Any process that activates or increases the frequency, rate or extent of cellular DNA-templated transcription." [GOC:go_curators, GOC:txnOH];"Interacting selectively and non-covalently with cyclins, proteins whose levels in a cell varies markedly during the cell cycle, rising steadily until mitosis, then falling abruptly to …	.	414	514	434	246	144	390	662	524	607	420	597	641	693	1179	886	1159	927	1093	1000	-0.0842566	0.239541	0.832731	1.0705	0.240232	0.00013474	0.106119	0.238122	0.781306	0.451029	0.219197	0.143644
ENSG00000180011	ZADH2	zinc binding alcohol dehydrogenase domain containing 2	A semiautonomous, self replicating organelle that occurs in varying numbers, shapes, and sizes in the cytoplasm of virtually all eukaryotic cells. It is notably the site of tissue respiration. [GOC:giardia, ISBN:0198506732];"A small organelle enclosed by a single membrane, and found in most eukaryotic cells. Contains peroxidases and other enzymes involved in a variety of metabolic processes inclu…	.	793	887	799	541	322	955	824	782	775	473	863	795	904	1932	1500	1891	2882	2950	2880	-0.406962	0.176761	0.0982303	1.07032	0.174802	3.45861e-08	0.897094	0.166851	2.78395e-06	0.634593	0.223268	0.0343245
ENSG00000109320	NFKB1	nuclear factor kappa B subunit 1	Interacting selectively and non-covalently with an identical protein or proteins. [GOC:jl];"Any process that activates or increases the frequency, rate or extent of cellular DNA-templated transcription." [GOC:go_curators, GOC:txnOH];"Innate immune responses are defense responses mediated by germline encoded components that directly recognize components of potential pathogens." [GO_REF:0000022, GO…	cellular response to nicotine;cellular response to interleukin-6;positive regulation of miRNA metabolic process;negative regulation of transcription from RNA polymerase II promoter in response to UV-induced DNA damage;Common variable immunodeficiency;positive regulation of transcription DNA-templated;cellular response to lipopolysaccharide;positive regulation of canonical Wnt signaling pathway;Im…	867	856	820	267	183	627	609	485	479	323	679	626	707	1380	1070	1360	1247	1189	1183	-0.283763	0.124903	0.104277	1.06678	0.124419	1.02038e-15	0.108882	0.118554	0.559053	0.405756	0.204017	0.159422
ENSG00000166598	HSP90B1	microRNA 3652;heat shock protein 90 beta family member 1	A series of molecular signals mediated by the endoplasmic reticulum membrane stress sensor ATF6 (activating transcription factor 6). Begins with activation of ATF6 in response to endoplasmic reticulum (ER) stress, and ends with regulation of a downstream cellular process, e.g. transcription. Under conditions of endoplasmic reticulum stress, ATF6 translocates to the Golgi where it is processed by …	negative regulation of retrograde protein transport ER to cytosol;ER-associated ubiquitin-dependent protein catabolic process;canonical Wnt signaling pathway involved in negative regulation of apoptotic process	9552	10513	9962	2589	1744	6621	11746	8954	10327	6133	9244	9906	9693	20403	15286	18363	22310	22433	21103	-0.252412	0.240531	0.505855	1.06558	0.245323	0.000212843	0.471418	0.24337	0.166782	0.520154	0.220942	0.0889021
ENSG00000068028	RASSF1	Ras association domain family member 1	An intracellular structure that can catalyze gamma-tubulin-dependent microtubule nucleation and that can anchor microtubules by interacting with their minus ends, plus ends or sides. [GOC:vw, http://en.wikipedia.org/wiki/Microtubule_organizing_center, ISBN:0815316194, PMID:17072892, PMID:17245416];"The membrane surrounding a cell that separates the cell from its external environment. It consists …	negative regulation of cell cycle arrest;LUNG CANCER ALVEOLAR CELL CARCINOMA INCLUDED	326	314	275	79	45	300	270	186	266	145	307	284	264	527	424	549	623	515	533	-0.168967	0.198028	0.5969	1.06392	0.194858	1.30175e-06	0.338898	0.195989	0.226046	0.498967	0.205941	0.0782883
ENSG00000166557	TMED3	transmembrane p24 trafficking protein 3	The component of a membrane consisting of the gene products and protein complexes having at least some part of their peptide sequence embedded in the hydrophobic region of the membrane. [GOC:dos, GOC:go_curators];"The irregular network of unit membranes, visible only by electron microscopy, that occurs in the cytoplasm of many eukaryotic cells. The membranes form a complex meshwork of tubular cha…	.	1039	1067	990	292	235	1016	960	728	752	518	1163	1373	1324	1842	1545	1848	2123	2089	2042	0.189746	0.135431	0.355717	1.06389	0.128909	1.37589e-14	0.432842	0.126667	0.00656312	0.605777	0.149178	0.00124542
ENSG00000106638	TBL2	transducin (beta)-like 2	The irregular network of unit membranes, visible only by electron microscopy, that occurs in the cytoplasm of many eukaryotic cells. The membranes form a complex meshwork of tubular channels, which are often expanded into slitlike cavities called cisternae. The ER takes two forms, rough (or granular), with ribosomes adhering to the outer surface, and smooth (with no ribosomes attached). [ISBN:019…	endoplasmic reticulum unfolded protein response;cellular response to glucose starvation;cellular response to hypoxia;Williams syndrome	1103	1125	1000	319	177	1096	842	752	731	528	1202	1171	1258	1874	1458	1904	2414	2482	2377	0.107149	0.160693	0.67907	1.06374	0.163439	3.35079e-09	0.653505	0.159053	0.000665314	0.655696	0.160483	0.00114616
ENSG00000138801	PAPSS1	3'-phosphoadenosine 5'-phosphosulfate synthase 1	Catalysis of the reaction: ATP + sulfate = diphosphate + adenylylsulfate. [EC:2.7.7.4];"The chemical reactions and pathways resulting in the formation of 3'-phosphoadenosine 5'-phosphosulfate, a naturally occurring mixed anhydride. It is an intermediate in the formation of a variety of sulfo compounds in biological systems." [ISBN:0198506732];"The process whose specific outcome is the progression…	.	2330	2469	2189	1155	579	2435	2420	2316	2343	1611	4662	5087	5575	4992	4076	5117	4418	4572	4449	0.737827	0.154956	6.2963e-05	1.06363	0.151767	1.30836e-10	0.103802	0.148265	0.651678	0.682129	0.159224	0.000578288
ENSG00000153214	TMEM87B	.	.	.	202	290	237	82	60	144	252	245	241	193	294	312	267	513	430	447	312	365	320	-0.0329073	0.233948	0.935898	1.06257	0.232857	8.59698e-05	-0.290112	0.232308	0.406959	0.364541	0.238307	0.291367
ENSG00000104331	IMPAD1	inositol monophosphatase domain containing 1	The process, occurring in the embryo, by which the anatomical structures of the digit are generated and organized. A digit is one of the terminal divisions of an appendage, such as a finger or toe. [GOC:bf, GOC:jl, UBERON:0002544];"The process of introducing one or more phosphate groups into a phosphatidylinositol, any glycerophosphoinositol having one phosphatidyl group esterified to one of the …	Chondrodysplasia with joint dislocations GRAPP type;CHONDRODYSPLASIA WITH JOINT DISLOCATIONS GPAPP TYPE	2357	2789	2610	907	587	1682	2651	2277	2533	1857	2329	2413	2295	5030	4225	5025	3533	3615	3505	-0.38419	0.185103	0.144121	1.05975	0.186603	4.08166e-07	-0.240387	0.184779	0.385745	0.294123	0.239317	0.406974
ENSG00000112062	MAPK14	mitogen-activated protein kinase 14	The condensation of mesenchymal cells that have been committed to differentiate into chondrocytes. [ISBN:0878932437];"Any process that increases the rate, frequency, or extent of brown fat cell differentiation. Brown fat cell differentiation is the process in which a relatively unspecialized cell acquires specialized features of a brown adipocyte, an animal connective tissue cell involved in adap…	positive regulation of interleukin-12 secretion;positive regulation of reactive oxygen species metabolic process;positive regulation of cyclase activity;cellular response to vascular endothelial growth factor stimulus;positive regulation of gene expression;positive regulation of erythrocyte differentiation;cellular response to virus;cellular response to ionizing radiation;oxidative stress-induced…	1697	1849	1708	533	302	1407	1870	1503	1731	1211	2128	2306	2315	3560	2636	3353	2971	3036	2848	0.13165	0.205715	0.687027	1.05615	0.209525	1.02188e-05	0.0721439	0.206184	0.832663	0.490164	0.194079	0.0644778
ENSG00000038427	VCAN	versican	Interacting selectively and non-covalently with calcium ions (Ca2+). [GOC:ai];"The chemical reactions and pathways resulting in the formation of chondroitin sulfate, any member of a group of 10-60 kDa glycosaminoglycans, widely distributed in cartilage and other mammalian connective tissues, the repeat units of which consist of beta-(1,4)-linked D-glucuronyl beta-(1,3)-N-acetyl-D-galactosamine su…	Wagner disease;WAGNER VITREORETINOPATHY	25164	28536	28034	5967	3575	13825	15032	12891	14702	9819	15957	15269	15466	35990	34749	32615	21766	21725	19585	-0.513063	0.217856	0.0892677	1.0542	0.226248	5.69201e-05	-0.535515	0.222249	0.0750422	0.203332	0.272982	0.633519
ENSG00000109079	TNFAIP1	TNF alpha induced protein 1	The cellular metabolic process in which a cell duplicates one or more molecules of DNA. DNA replication begins when specific sequences, known as origins of replication, are recognized and bound by initiation proteins, and ends when the original DNA molecule has been completely duplicated and the copies topologically separated. The unit of replication usually corresponds to the genome of the cell,…	negative regulation of Rho protein signal transduction;positive regulation of stress fiber assembly;negative regulation of vascular associated smooth muscle cell migration	818	868	817	205	120	581	554	501	449	339	931	859	894	1258	996	1255	1561	1517	1521	0.23629	0.177774	0.384124	1.05248	0.180934	1.91478e-07	0.559153	0.177979	0.0141106	0.652174	0.154851	0.000749414
ENSG00000170004	CHD3	chromodomain helicase DNA binding protein 3	The cellular synthesis of RNA on a template of DNA. [GOC:jl, GOC:txnOH];"An approximately 2 MDa multi-subunit complex that exhibits ATP-dependent chromatin remodeling activity in addition to histone deacetylase (HDAC) activity, and has been shown to establish transcriptional repression of a number of target genes in vertebrates, invertebrates and fungi. Amongst its subunits, the NuRD complex cont…	.	843	968	953	485	323	1021	1350	1143	1199	765	1279	1151	1281	2331	2052	2161	5843	5798	5451	-0.193227	0.219955	0.584419	1.05017	0.219856	3.41803e-05	1.53445	0.215807	1.03691e-10	0.941241	0.250174	0.00316635
ENSG00000086598	TMED2	transmembrane p24 trafficking protein 2	The addition of COPII proteins and adaptor proteins to ER membranes during the formation of transport vesicles, forming a vesicle coat. [GOC:ascb_2009, GOC:dph, GOC:jid, GOC:mah, GOC:tb, ISBN:0716731363, PMID:10219233];"The establishment, maintenance and elaboration of the rostro-caudal axis of a somite, prior to the morphological formation of a somite boundary." [GOC:bf, PMID:16326386, PMID:1736…	Golgi organization	4989	5593	4968	2662	1556	6004	5851	4571	4824	3470	6201	6487	6126	11573	8463	11725	11034	11545	10843	-0.132973	0.132691	0.528471	1.04913	0.137826	1.85342e-12	0.242996	0.126978	0.172793	0.464625	0.183392	0.0634738
ENSG00000136867	SLC31A2	solute carrier family 31 member 2	A prelysosomal endocytic organelle differentiated from early endosomes by lower lumenal pH and different protein composition. Late endosomes are more spherical than early endosomes and are mostly juxtanuclear, being concentrated near the microtubule organizing center. [NIF_Subcellular:nlx_subcell_20090702, PMID:11964142, PMID:2557062];"Catalysis of the transfer of copper (Cu) ions from one side o…	.	83	95	65	22	20	63	91	64	91	51	98	114	170	146	137	165	246	213	247	0.381856	0.250649	0.310115	1.04569	0.215388	2.41101e-05	0.814453	0.208667	0.00139483	0.767858	0.171375	0.000287119
ENSG00000057252	SOAT1	sterol O-acyltransferase 1	A lipid modification process in which a sterol ester is formed by the combination of a carboxylic acid (often a fatty acid) and cholesterol. In the blood this process is associated with the conversion of free cholesterol into cholesteryl ester, which is then sequestered into the core of a lipoprotein particle. [GOC:BHF, GOC:mah, GOC:pde, GOC:rl];"The accumulation and maintenance in cells or tissu…	cholesterol efflux;positive regulation of amyloid precursor protein biosynthetic process;very-low-density lipoprotein particle assembly;cholesterol metabolic process;sterol O-acyltransferase activity;cholesterol O-acyltransferase activity;positive regulation of cholesterol esterification;cholesterol storage;macrophage derived foam cell differentiation	1766	1884	1794	1007	570	2103	1470	1090	1292	1114	2405	2324	2385	3780	2725	3615	1919	1978	1646	0.108394	0.154201	0.663873	1.04401	0.159598	2.73854e-09	-0.698831	0.151057	8.78257e-05	0.313909	0.243847	0.38243
ENSG00000162236	STX5	syntaxin 5	Interacting selectively and non-covalently with a SNARE (soluble N-ethylmaleimide-sensitive factor attached protein receptor) protein. [PMID:12642621];"The initial attachment of a transport vesicle membrane to the target membrane, mediated by proteins protruding from the membrane of the vesicle and the target membrane. Docking requires only that the two membranes come close enough for these prote…	early endosome to Golgi transport;positive regulation of protein catabolic process	261	325	267	72	42	221	220	193	215	144	382	435	434	483	377	461	508	491	495	0.531068	0.167816	0.01435	1.04355	0.167509	1.85083e-08	0.337187	0.161958	0.13265	0.667161	0.146226	0.000213436
ENSG00000198856	OSTC	oligosaccharyltransferase complex non-catalytic subunit	The component of a membrane consisting of the gene products and protein complexes having at least some part of their peptide sequence embedded in the hydrophobic region of the membrane. [GOC:dos, GOC:go_curators];"Interacting selectively and non-covalently with any protein or protein complex (a complex of two or more proteins that may include other nonprotein molecules)." [GOC:go_curators];"Catal…	.	2975	3442	3023	1617	810	3371	3576	2845	3044	2421	4323	5215	4859	7085	5044	7134	6480	7186	6824	0.196571	0.157258	0.417309	1.04298	0.159655	2.89341e-09	0.255062	0.150708	0.237202	0.546455	0.162742	0.0101144
ENSG00000134910	STT3A	STT3A, catalytic subunit of the oligosaccharyltransferase complex	The component of a membrane consisting of the gene products and protein complexes having at least some part of their peptide sequence embedded in the hydrophobic region of the membrane. [GOC:dos, GOC:go_curators];"The process of covalently altering one or more amino acids in a protein after the protein has been completely translated and released from the ribosome." [GOC:jsg];"The process of coval…	CONGENITAL DISORDER OF GLYCOSYLATION TYPE Iw;protein N-linked glycosylation via asparagine;dolichyl-diphosphooligosaccharide-protein glycotransferase activity;STT3A-CDG;co-translational protein modification	3942	4058	3849	1832	1198	3547	4665	4027	4290	2770	4532	4931	5317	9121	6806	8401	9666	9646	9303	-0.103031	0.163963	0.692818	1.04278	0.163781	8.01937e-09	0.394998	0.157518	0.0619327	0.513318	0.181776	0.0356742
ENSG00000158092	NCK1	NCK adaptor protein 1	Interacting selectively and non-covalently with an ephrin receptor. [GOC:ai];"Any process that results in a change in state or activity of a cell or an organism (in terms of movement, secretion, enzyme production, gene expression, etc.) as a result of a stimulus from another living organism." [GOC:ai];"The formation of a cell surface protrusion, such as a lamellipodium or filopodium, at the leadi…	positive regulation of actin filament polymerization;T cell activation;positive regulation of T cell proliferation	759	936	835	432	237	839	668	560	650	462	961	1020	1071	1622	1177	1712	1577	1683	1488	0.0513223	0.110872	0.777844	1.04206	0.120734	6.42976e-16	0.236467	0.100444	0.0836411	0.498112	0.165397	0.0236538
ENSG00000156345	CDK20	.	.	.	199	193	204	43	42	183	148	113	110	55	293	297	288	299	264	298	526	484	494	0.630305	0.215184	0.0264012	1.04078	0.216543	2.9964e-05	0.953957	0.210846	0.000134052	0.882418	0.134571	1.2698e-08
ENSG00000125827	TMX4	thioredoxin related transmembrane protein 4	The component of a membrane consisting of the gene products and protein complexes having at least some part of their peptide sequence embedded in the hydrophobic region of the membrane. [GOC:dos, GOC:go_curators];"The irregular network of unit membranes, visible only by electron microscopy, that occurs in the cytoplasm of many eukaryotic cells. The membranes form a complex meshwork of tubular cha…	.	1057	1351	1139	597	390	889	1024	853	1008	711	1352	1478	1320	2310	1823	2316	2997	3196	3023	-0.0276596	0.126362	0.89849	1.03958	0.125779	1.25689e-14	0.670352	0.116074	3.54784e-07	0.611387	0.163554	0.00342043
ENSG00000143870	PDIA6	protein disulfide isomerase family A member 6	The irregular network of unit membranes, visible only by electron microscopy, that occurs in the cytoplasm of many eukaryotic cells. The membranes form a complex meshwork of tubular channels, which are often expanded into slitlike cavities called cisternae. The ER takes two forms, rough (or granular), with ribosomes adhering to the outer surface, and smooth (with no ribosomes attached). [ISBN:019…	.	8808	9994	8798	4050	2412	10198	13876	11361	12412	8247	11675	13482	13064	23786	17397	22657	21422	22551	21254	-0.115266	0.245305	0.774249	1.03813	0.248319	0.000406001	0.197853	0.245301	0.611357	0.45518	0.215077	0.130772
ENSG00000130956	HABP4	hyaluronan binding protein 4	The cellular synthesis of RNA on a template of DNA. [GOC:jl, GOC:txnOH];"That part of the nuclear content other than the chromosomes or the nucleolus." [GOC:ma, ISBN:0124325653];"The repeating unit of a myofibril in a muscle cell, composed of an array of overlapping thick and thin filaments between two adjacent Z discs." [ISBN:0815316194];"The space external to the outermost structure of a cell. …	.	573	664	568	329	223	747	626	594	563	441	1044	1087	1293	1327	1080	1426	3162	3348	3078	0.439962	0.167564	0.0520294	1.0366	0.161891	6.45698e-09	1.46998	0.152872	1.64455e-19	1.02874	0.16807	1.51808e-07
ENSG00000068724	TTC7A	tetratricopeptide repeat domain 7A	Any process involved in the maintenance of an internal steady state of iron ions at the level of a cell. [GOC:ai, GOC:mah];"The process whose specific outcome is the progression of the myeloid and lymphoid derived organ/tissue systems of the blood and other parts of the body over time, from formation to the mature structure. The site of hemopoiesis is variable during development, but occurs prima…	Multiple intestinal atresia;GASTROINTESTINAL DEFECTS AND IMMUNODEFICIENCY SYNDROME;INTESTINAL ATRESIA MULTIPLE;Combined immunodeficiency-enteropathy spectrum	356	359	300	96	87	286	322	283	257	185	483	443	406	638	517	580	999	1003	912	0.219093	0.144278	0.311549	1.03605	0.138272	4.41439e-12	0.892362	0.129369	4.26321e-10	0.751681	0.14553	1.67742e-05
ENSG00000111229	ARPC3	actin related protein 2/3 complex subunit 3	A thin sheetlike process extended by the leading edge of a migrating cell or extending cell process; contains a dense meshwork of actin filaments. [ISBN:0815316194];"The actin nucleation process in which actin monomers combine to form a new branch on the side of an existing actin filament; mediated by the Arp2/3 protein complex and its interaction with other proteins." [GOC:mah, PMID:16959963, PM…	.	1495	1793	1429	506	289	1672	1778	1264	1460	1065	1959	2167	1994	3048	2247	3358	2845	3072	2871	0.108976	0.192155	0.725646	1.03022	0.199002	5.34019e-06	0.178561	0.191605	0.55212	0.499551	0.182716	0.0425677
ENSG00000154813	DPH3	diphthamide biosynthesis 3	That part of the nuclear content other than the chromosomes or the nucleolus. [GOC:ma, ISBN:0124325653];"A membrane-bounded organelle of eukaryotic cells in which chromosomes are housed and replicated. In most cells, the nucleus contains all of the cell's chromosomes except the organellar chromosomes, and is the site of RNA synthesis and processing. In some species, or in specialized cell types, …	.	979	1061	940	511	281	977	841	636	737	567	1002	1107	984	1848	1484	1932	1851	1962	1690	-0.169907	0.108043	0.291336	1.02926	0.105847	3.73926e-20	0.207772	0.096034	0.116439	0.431462	0.181977	0.086272
ENSG00000100219	XBP1	X-box binding protein 1	The chemical reactions and pathways resulting in the breakdown of a protein or peptide by hydrolysis of its peptide bonds, initiated by the covalent attachment of a ubiquitin group, or multiple ubiquitin groups, to the protein. [GOC:go_curators];"Any process that results in a change in state or activity of a cell (in terms of movement, secretion, enzyme production, gene expression, etc.) as a res…	MAJOR AFFECTIVE DISORDER 7;positive regulation of endoplasmic reticulum unfolded protein response;positive regulation of MHC class II biosynthetic process;positive regulation of transcription from RNA polymerase II promoter	2170	2379	2117	1015	528	2447	3223	2553	2715	1908	2252	2410	2207	5485	3976	5281	4916	5025	4771	-0.480582	0.229017	0.139041	1.02902	0.232607	0.000154018	0.154016	0.228587	0.664937	0.36128	0.238084	0.295639
ENSG00000171067	C11orf24	.	.	.	329	282	356	118	77	305	228	178	172	133	275	218	209	510	444	527	334	249	319	-0.47469	0.173583	0.0411629	1.02878	0.157498	2.90171e-09	-0.56253	0.172574	0.0102127	0.187775	0.262456	0.64766
ENSG00000091317	CMTM6	.	.	.	1863	2251	1956	1150	666	2468	2584	1909	2179	1637	3443	3612	3596	4736	3631	4928	3924	4022	3908	0.278147	0.173176	0.278821	1.02697	0.176007	1.73647e-07	-0.0143583	0.169146	0.961734	0.493174	0.179231	0.0411608
ENSG00000173715	C11orf80	chromosome 11 open reading frame 80	The cell cycle process in which double-strand breaks are generated at defined hotspots throughout the genome during meiosis I. This results in the initiation of meiotic recombination. [GOC:elh, GOC:jl, PMID:11529427];"A structure composed of a very long molecule of DNA and associated proteins (e.g. histones) that carries hereditary information." [ISBN:0198547684];"The cell cycle process in which …	.	369	416	318	124	73	352	252	220	253	166	427	435	454	643	484	585	715	647	639	0.21257	0.129282	0.26653	1.02527	0.13228	6.70574e-13	0.363842	0.124576	0.0250057	0.575941	0.147107	0.00197758
ENSG00000265808	SEC22B	SEC22 homolog B, vesicle trafficking protein (gene/pseudogene)	Interacting selectively and non-covalently with a SNARE (soluble N-ethylmaleimide-sensitive factor attached protein receptor) protein. [PMID:12642621];"The addition of COPII proteins and adaptor proteins to ER membranes during the formation of transport vesicles, forming a vesicle coat." [GOC:ascb_2009, GOC:dph, GOC:jid, GOC:mah, GOC:tb, ISBN:0716731363, PMID:10219233];"The directed movement of p…	positive regulation of protein catabolic process;positive regulation of organelle organization	1008	1191	998	466	307	877	1003	771	817	690	1234	1451	1403	2122	1485	2069	2159	2229	1961	0.122768	0.101074	0.431822	1.0251	0.106426	8.8894e-20	0.305697	0.0854656	0.00405912	0.527714	0.151026	0.00702678
ENSG00000134987	WDR36	WD repeat domain 36	A tissue homeostatic process involved in the maintenance of an internal equilibrium within the retina of the eye, including control of cellular proliferation and death and control of metabolic function. [GOC:add, GOC:dph, GOC:tb, PMID:15365173, PMID:15365178];"A small, dense body one or more of which are present in the nucleus of eukaryotic cells. It is rich in RNA and protein, is not bounded by …	GLAUCOMA 1 OPEN ANGLE G	3071	3698	3294	1661	1030	3528	3733	2785	3089	2268	4286	4444	4181	7086	5526	7042	4991	5085	4897	-0.0190757	0.121918	0.928635	1.01887	0.122689	9.136e-15	-0.255129	0.115666	0.108457	0.351564	0.199915	0.219258
ENSG00000144747	TMF1	TATA element modulatory factor 1	The regulated release of luteinizing hormone, a gonadotropic glycoprotein hormone secreted by the anterior pituitary. [ISBN:0198506732];"Any process that activates or increases the frequency, rate or extent of production of a cytokine." [GOC:add, ISBN:0781735149];"The synthesis of RNA from a DNA template by RNA polymerase II, originating at an RNA polymerase II promoter. Includes transcription of…	.	1352	1560	1503	802	543	1392	1717	1294	1560	1202	2227	2363	2328	3381	2570	3281	3460	3647	3270	0.169677	0.166405	0.519342	1.01527	0.168335	5.82649e-08	0.302777	0.160867	0.181276	0.538539	0.160176	0.010012
ENSG00000134294	SLC38A2	solute carrier family 38 member 2	Enables the active transport of a solute across a membrane by a mechanism whereby two or more species are transported together in the same direction in a tightly coupled process not directly linked to a form of energy other than chemiosmotic energy. [GOC:mtg_transport, ISBN:0815340729, PMID:10839820];"The directed movement of amino acids, organic acids containing one or more amino substituents, i…	.	7444	8361	7707	3086	1591	7136	7033	5184	6179	4513	9685	9295	9762	14060	11277	13803	9765	8957	7848	0.13476	0.0980054	0.365738	1.01508	0.10058	1.09776e-21	-0.430619	0.103487	0.000546958	0.355901	0.205884	0.227489
ENSG00000107175	CREB3	cAMP responsive element binding protein 3	The synthesis of RNA from a DNA template by RNA polymerase II, originating at an RNA polymerase II promoter. Includes transcription of messenger RNA (mRNA) and certain small nuclear RNAs (snRNAs). [GOC:jl, GOC:txnOH, ISBN:0321000382];"Any process that activates or increases the frequency, rate or extent of transcription from an RNA polymerase II promoter." [GOC:go_curators, GOC:txnOH];"The direct…	transcriptional activator activity RNA polymerase II core promoter proximal region sequence-specific binding	484	445	411	127	74	421	537	395	391	261	481	414	456	861	645	856	1292	1184	1277	-0.208541	0.216752	0.545975	1.01474	0.216487	5.02321e-05	0.800319	0.213764	0.0023897	0.620165	0.209039	0.026223
ENSG00000161981	SNRNP25	small nuclear ribonucleoprotein U11/U12 subunit 25	A direct connection between the cytoplasm of two cells that is formed following the completion of cleavage furrow ingression during cell division. They are usually present only briefly prior to completion of cytokinesis. However, in some cases, such as the bridges between germ cells during their development, they become stabilised. [PMID:9635420];"That part of the nuclear content other than the c…	.	932	972	826	355	197	1499	695	598	596	456	902	1042	1026	1650	1306	1830	2569	2373	2375	-0.0915062	0.231167	0.810886	1.01337	0.233101	0.000210277	0.744469	0.228547	0.0102776	0.62198	0.199842	0.0186463
ENSG00000151327	FAM177A1	family with sequence similarity 177 member A1	.	.	437	477	473	346	240	554	576	484	548	425	728	692	645	1257	902	1236	1157	1154	1100	-0.119061	0.23319	0.752836	1.01303	0.23557	0.000254055	0.150628	0.227016	0.669999	0.42374	0.211326	0.155882
ENSG00000162434	JAK1	Janus kinase 1	A series of molecular signals initiated by the binding of an extracellular ligand to a receptor on the surface of the target cell where the receptor possesses tyrosine kinase activity, and ending with regulation of a downstream cellular process, e.g. transcription. [GOC:ceb, GOC:signaling];"Innate immune responses are defense responses mediated by germline encoded components that directly recogni…	.	1831	2147	1945	635	346	1299	1658	1492	1378	990	2392	2456	2764	3280	2516	3317	4056	4282	4378	0.319997	0.145644	0.118149	1.01062	0.147446	3.67944e-10	0.608525	0.14469	0.000462296	0.670045	0.130623	1.96245e-05
ENSG00000102471	NDFIP2	Nedd4 family interacting protein 2	Any process that activates or increases the frequency, rate or extent of the addition of ubiquitin groups to a protein. [GOC:mah];"The directed movement of substances into, out of or within a vacuole." [GOC:ai];"The cellular process in which a signal is conveyed to trigger a change in the activity or state of a cell. Signal transduction begins with reception of a signal (e.g. a ligand binding to …	positive regulation of protein ubiquitination;negative regulation of protein transport;negative regulation of gene expression;positive regulation of I-kappaB kinase/NF-kappaB signaling;negative regulation of transporter activity;signal transducer activity	756	899	801	338	203	732	1031	858	934	652	1133	1194	1332	1734	1344	1890	2513	2740	2539	0.144041	0.203314	0.661214	1.00931	0.205252	1.81538e-05	0.776156	0.199474	0.00144751	0.682729	0.167769	0.00120767
ENSG00000150403	TMCO3	transmembrane and coiled-coil domains 3	The component of a membrane consisting of the gene products and protein complexes having at least some part of their peptide sequence embedded in the hydrophobic region of the membrane. [GOC:dos, GOC:go_curators];"Catalysis of the transfer of a solute or solutes from one side of a membrane to the other according to the reaction: solute(out) + H+(in) = solute(in) + H+(out)." [GOC:ai];"The directed…	.	1005	1088	912	444	312	1031	1390	1102	1231	887	1342	1347	1392	2442	1801	2317	2345	2422	2309	-0.0988322	0.210998	0.775033	1.00619	0.213789	4.62284e-05	0.239298	0.209023	0.454073	0.452931	0.196529	0.0962493
ENSG00000102218	RP2	.	.	Retinitis pigmentosa	426	488	451	234	130	505	514	372	451	364	841	892	817	996	727	1010	1203	1226	1081	0.475194	0.15291	0.0166573	1.00558	0.157662	7.46961e-09	0.484991	0.146231	0.00875782	0.671604	0.126227	8.01112e-06
ENSG00000155876	RRAGA	Ras related GTP binding A	A protein complex involved in regulation of non-nitrogen-starvation (NNS) autophagic process. In S. cerevisiae this complex contains Iml1p, Npr2p and Npr3p proteins. In humans the GATOR1 complex consists of DEPDC5, Nprl2, Nprl3. [GOC:rb, PMID:21900499, PMID:23974112];"Any process that results in a change in state or activity of a cell (in terms of movement, secretion, enzyme production, gene expr…	positive regulation of TORC1 signaling;cellular response to amino acid starvation;cellular response to amino acid stimulus;cellular protein localization;negative regulation of autophagy	857	862	773	236	152	960	737	669	671	523	893	986	1083	1549	1193	1522	1856	1876	1820	0.0529837	0.19109	0.870082	1.00466	0.189294	2.80077e-06	0.502921	0.185815	0.0410761	0.568392	0.170167	0.0105485
ENSG00000115486	GGCX	.	.	Body skin hyperlaxity due to vitamin K-dependent coagulation factor deficiency	622	605	614	174	129	522	589	491	522	349	761	827	804	1130	935	996	2081	2057	1953	0.210918	0.148573	0.348721	1.00305	0.150014	1.10871e-09	1.10187	0.143007	1.59246e-12	0.817959	0.156297	1.22083e-05
ENSG00000118363	SPCS2	signal peptidase complex subunit 2	The component of a membrane consisting of the gene products and protein complexes having at least some part of their peptide sequence embedded in the hydrophobic region of the membrane. [GOC:dos, GOC:go_curators];"Catalysis of the hydrolysis of a peptide bond. A peptide bond is a covalent bond formed when the carbon atom from the carboxyl group of one amino acid shares electrons with the nitrogen…	.	401	437	376	136	85	233	269	234	256	189	416	426	530	639	515	587	791	1003	694	0.222665	0.142927	0.296901	1.00084	0.132503	2.85556e-12	0.622748	0.143123	0.00026716	0.643438	0.142258	0.000247213
ENSG00000160199	PKNOX1	PBX/knotted 1 homeobox 1	The process whose specific outcome is the progression of the myeloid and lymphoid derived organ/tissue systems of the blood and other parts of the body over time, from formation to the mature structure. The site of hemopoiesis is variable during development, but occurs primarily in bone marrow or kidney in many adult vertebrates. [GOC:dgh, ISBN:0198506732];"The process in which a myeloid precurso…	.	270	257	314	151	70	331	415	332	322	258	492	466	459	686	556	641	725	737	704	0.16301	0.236642	0.671347	1.00036	0.236839	0.000344032	0.322529	0.233765	0.354396	0.539148	0.183704	0.0283469
ENSG00000140848	CPNE2	copine 2	All of the contents of a cell excluding the plasma membrane and nucleus, but including other subcellular structures. [ISBN:0198547684];"A membrane-bounded organelle of eukaryotic cells in which chromosomes are housed and replicated. In most cells, the nucleus contains all of the cell's chromosomes except the organellar chromosomes, and is the site of RNA synthesis and processing. In some species,…	.	227	261	281	70	48	148	313	244	236	154	386	372	410	460	401	456	914	851	870	0.391702	0.245928	0.283804	0.997778	0.246746	0.000683171	1.10419	0.243529	0.000128655	0.863219	0.174497	4.42423e-05
ENSG00000224597	SVIL-AS1	.	.	.	344	384	377	85	52	166	264	217	235	157	452	431	461	479	468	518	156	170	157	0.431136	0.214092	0.160089	0.992961	0.218113	8.99324e-05	-1.46855	0.224093	3.89313e-09	0.299025	0.318436	0.53465
ENSG00000106868	SUSD1	sushi domain containing 1	The component of a membrane consisting of the gene products and protein complexes having at least some part of their peptide sequence embedded in the hydrophobic region of the membrane. [GOC:dos, GOC:go_curators];"Interacting selectively and non-covalently with calcium ions (Ca2+)." [GOC:ai]	.	336	319	338	124	67	213	239	182	223	146	243	249	217	569	399	471	133	138	123	-0.468973	0.131828	0.00474246	0.979939	0.135008	2.3623e-11	-1.76436	0.135766	9.61123e-36	-0.00269944	0.337509	0.996981
ENSG00000181458	TMEM45A	transmembrane protein 45A	The component of a membrane consisting of the gene products and protein complexes having at least some part of their peptide sequence embedded in the hydrophobic region of the membrane. [GOC:dos, GOC:go_curators]	.	301	317	319	141	85	312	269	221	252	218	690	973	767	597	435	600	755	794	666	1.10588	0.138027	3.5161e-13	0.970102	0.121689	1.25872e-13	0.526848	0.105562	1.73501e-05	0.87971	0.122553	2.95087e-10
ENSG00000140650	PMM2	phosphomannomutase 2	All of the contents of a cell excluding the plasma membrane and nucleus, but including other subcellular structures. [ISBN:0198547684];"The chemical reactions and pathways resulting in the formation of GDP-mannose, a substance composed of mannose in glycosidic linkage with guanosine diphosphate." [GOC:ai];"The part of the cytoplasm that does not contain organelles but which does contain other par…	Congenital Disorders of Glycosylation;CONGENITAL DISORDER OF GLYCOSYLATION TYPE Ia;PMM2-CDG syndrome	639	716	643	194	142	291	602	451	526	330	231	272	228	981	861	1034	629	667	596	-1.4463	0.204855	2.5936e-10	0.933722	0.197453	4.20717e-05	-0.546243	0.196419	0.0347915	-0.0183911	0.319178	0.975018
ENSG00000102401	ARMCX3	armadillo repeat containing, X-linked 3	Interacting selectively and non-covalently with any protein or protein complex (a complex of two or more proteins that may include other nonprotein molecules). [GOC:go_curators];"Any process in which a protein is transported to, and/or maintained in, a specific location at the level of a cell. Localization at the cellular level encompasses movement within the cell, from within the cell to the cel…	.	1226	1411	1308	501	303	963	827	795	837	583	2671	2920	2951	2004	1550	2018	2422	2549	2420	1.1073	0.101638	2.41619e-24	0.927261	0.107012	4.84025e-16	0.449687	0.0969413	8.36776e-05	0.84783	0.116266	1.38011e-10
ENSG00000075234	TTC38	tetratricopeptide repeat domain 38	A membrane-bounded vesicle that is released into the extracellular region by fusion of the limiting endosomal membrane of a multivesicular body with the plasma membrane. Extracellular exosomes, also simply called exosomes, have a diameter of about 40-100 nm. [GOC:BHF, GOC:mah, GOC:vesicles, PMID:15908444, PMID:17641064, PMID:19442504, PMID:19498381, PMID:22418571, PMID:24009894]	.	219	230	228	131	75	435	315	240	261	196	435	430	398	543	443	496	1147	966	959	0.214099	0.247195	0.59033	0.875325	0.247281	0.00383312	1.03236	0.244451	0.000434004	0.74672	0.182609	0.00113368
ENSG00000179981	TSHZ1	teashirt zinc finger homeobox 1	Interacting selectively and non-covalently with chromatin, the network of fibers of DNA, protein, and sometimes RNA, that make up the chromosomes of the eukaryotic nucleus during interphase. [GOC:jl, ISBN:0198506732, PMID:20404130];"Any molecular function by which a gene product interacts selectively and non-covalently with DNA (deoxyribonucleic acid)." [GOC:dph, GOC:jl, GOC:tb, GOC:vw];"The cell…	External auditory canal aplasia/hypoplasia;Aural atresia congenital	208	212	224	74	57	139	165	122	161	76	139	138	167	258	359	253	818	792	721	-0.541169	0.161052	0.00845628	0.87519	0.19172	8.53807e-05	1.38424	0.130728	1.26199e-23	0.750066	0.265216	0.0354318
ENSG00000156140	ADAMTS3	ADAM metallopeptidase with thrombospondin type 1 motif 3	Any protein maturation process achieved by the cleavage of a peptide bond or bonds within a protein. Protein maturation is the process leading to the attainment of the full functional capacity of a protein. [GOC:curators, GOC:jl, GOC:jsg];"The space external to the outermost structure of a cell. For cells without external protective or external encapsulating structures this refers to space outsid…	.	345	406	348	252	145	434	453	468	428	309	686	654	695	855	674	815	2298	2397	2308	0.235875	0.217265	0.488625	0.870489	0.217951	0.000816553	1.55338	0.210901	1.79786e-11	0.971047	0.21297	0.000215486
ENSG00000182022	CHST15	carbohydrate (N-acetylgalactosamine 4-sulfate 6-O) sulfotransferase 15	The component of a membrane consisting of the gene products and protein complexes having at least some part of their peptide sequence embedded in the hydrophobic region of the membrane. [GOC:dos, GOC:go_curators];"The chemical reactions and pathways resulting in the formation of chondroitin sulfate, any member of a group of 10-60 kDa glycosaminoglycans, widely distributed in cartilage and other m…	.	248	244	216	174	104	406	262	233	265	169	515	506	598	479	479	544	2731	2678	2688	0.530228	0.236271	0.109572	0.86432	0.236109	0.00258865	2.38039	0.225452	1.69778e-23	1.45164	0.289301	3.28365e-05
ENSG00000164574	GALNT10	polypeptide N-acetylgalactosaminyltransferase 10	The component of a membrane consisting of the gene products and protein complexes having at least some part of their peptide sequence embedded in the hydrophobic region of the membrane. [GOC:dos, GOC:go_curators];"Interacting selectively and non-covalently with any metal ion." [GOC:ai];"Catalysis of the reaction: UDP-N-acetyl-D-galactosamine + polypeptide = UDP + N-acetyl-D-galactosaminyl-polypep…	.	449	454	455	90	64	189	321	283	321	184	446	410	478	548	540	531	1286	1442	1405	0.133333	0.245526	0.736985	0.846634	0.249297	0.0060005	1.29331	0.245023	4.51263e-06	0.829318	0.210438	0.0018243
ENSG00000183605	SFXN4	sideroflexin 4	A semiautonomous, self replicating organelle that occurs in varying numbers, shapes, and sizes in the cytoplasm of virtually all eukaryotic cells. It is notably the site of tissue respiration. [GOC:giardia, ISBN:0198506732];"The component of a membrane consisting of the gene products and protein complexes having at least some part of their peptide sequence embedded in the hydrophobic region of th…	Combined oxidative phosphorylation deficiency 18;Growth and developmental delay-hypotonia-vision impairment-lactic acidosis syndrome	438	540	451	139	91	401	478	490	412	300	551	675	698	769	585	826	369	356	366	0.198825	0.206035	0.544761	0.805812	0.204651	0.00100078	-1.05541	0.202861	6.47581e-06	0.169423	0.26286	0.685705
ENSG00000152642	GPD1L	glycerol-3-phosphate dehydrogenase 1-like	The chemical reactions and pathways resulting in the formation of a triglyceride, any triester of glycerol. [ISBN:0198506732];"Catalysis of the reaction: sn-glycerol 3-phosphate + NAD+ = glycerone phosphate + NADH + H+." [EC:1.1.1.8, EC:1.1.1.94];"The chemical reactions and pathways involving nicotinamide adenine dinucleotide (NAD), a coenzyme present in most living cells and derived from the B v…	positive regulation of sodium ion transport;positive regulation of sodium ion transmembrane transporter activity;NAD metabolic process;sodium channel regulator activity;negative regulation of peptidyl-serine phosphorylation;regulation of ventricular cardiac muscle cell membrane depolarization;BRUGADA SYNDROME;BRUGADA SYNDROME 2;positive regulation of voltage-gated potassium channel activity invol…	404	438	388	205	97	400	442	317	407	292	935	928	1087	729	572	716	1618	1590	1434	0.912843	0.144289	2.4552e-08	0.803783	0.142301	4.81352e-07	1.1157	0.132625	6.61584e-15	0.949513	0.0932686	5.57278e-21
ENSG00000165061	ZMAT4	zinc finger matrin-type 4	A membrane-bounded organelle of eukaryotic cells in which chromosomes are housed and replicated. In most cells, the nucleus contains all of the cell's chromosomes except the organellar chromosomes, and is the site of RNA synthesis and processing. In some species, or in specialized cell types, RNA metabolism or DNA replication may be absent. [GOC:go_curators];"Any molecular function by which a gen…	.	116	118	114	71	44	118	76	61	77	56	253	240	234	153	162	203	615	652	623	0.847637	0.206365	0.000805747	0.80182	0.220196	0.0027572	1.77401	0.188904	1.36868e-18	1.19298	0.200505	3.73674e-07
ENSG00000182359	KBTBD3	kelch repeat and BTB domain containing 3	Catalysis of the transfer of ubiquitin from one protein to another via the reaction X-Ub + Y --> Y-Ub + X, where both X-Ub and Y-Ub are covalent linkages. [GOC:BioGRID, GOC:jh2, PMID:9635407];"A ubiquitin ligase complex in which a cullin from the Cul3 subfamily and a RING domain protein form the catalytic core; substrate specificity is conferred by a BTB-domain-containing protein." [PMID:15571813…	.	87	128	117	42	27	100	47	72	78	46	262	280	253	52	41	48	183	189	148	1.21946	0.204951	2.04269e-07	-0.803694	0.243056	0.00779538	0.169703	0.209842	0.610571	0.417759	0.287007	0.31776
ENSG00000160191	PDE9A	phosphodiesterase 9A	The cellular process in which a signal is conveyed to trigger a change in the activity or state of a cell. Signal transduction begins with reception of a signal (e.g. a ligand binding to a receptor or receptor activation by a stimulus such as light), or for signal transduction in the absence of ligand, signal-withdrawal or the activity of a constitutively active receptor. Signal transduction ends…	.	218	252	215	132	76	263	307	247	268	147	718	690	703	155	101	162	385	424	362	1.07464	0.189334	9.00463e-07	-0.806416	0.213056	0.00169924	-0.210429	0.189327	0.469021	0.233643	0.276826	0.582336
ENSG00000167191	GPRC5B	G protein-coupled receptor class C group 5 member B	The specific movement from place to place of an organism in response to external or internal stimuli. Locomotion of a whole organism in a manner dependent upon some combination of that organism's internal state and external conditions. [GOC:dph];"The external part of the cell wall and/or plasma membrane." [GOC:jl, GOC:mtg_sensu, GOC:sm];"Any process that activates or increases the frequency, rate…	.	723	851	791	234	148	677	436	303	319	226	888	797	898	296	270	281	366	351	373	0.330693	0.231865	0.346271	-0.814395	0.239678	0.00596601	-1.33528	0.236169	6.73077e-07	-0.422601	0.262583	0.26552
ENSG00000100181	TPTEP1	.	.	.	261	230	222	59	65	238	193	135	182	106	53	36	36	101	100	113	394	425	362	-2.54791	0.217398	2.16717e-28	-0.819083	0.181512	0.000106605	0.186266	0.156978	0.434532	-0.644452	0.334876	0.17459
ENSG00000160602	NEK8	NIMA related kinase 8	The establishment of an organism's body plan or part of an organism with respect to the left and right halves. The pattern can either be symmetric, such that the halves are mirror images, or asymmetric where the pattern deviates from this symmetry. [GOC:dph, GOC:jid];"Morphogenesis of an organ. An organ is defined as a tissue or set of tissues that work together to perform a specific function or …	organ morphogenesis;cilium;RENAL-HEPATIC-PANCREATIC DYSPLASIA;Infantile nephronophthisis;RENAL-HEPATIC-PANCREATIC DYSPLASIA 2;NEPHRONOPHTHISIS 9	74	67	69	31	20	52	66	41	57	30	38	28	24	28	36	31	81	92	59	-1.33283	0.23011	4.85693e-07	-0.824367	0.225573	0.00264461	-0.447275	0.187333	0.0782048	-0.817047	0.180921	0.000252902
ENSG00000182134	TDRKH	tudor and KH domain containing	The process in which relatively unspecialized cells, e.g. embryonic or regenerative cells, acquire specialized structural and/or functional features that characterize the cells, tissues, or organs of the mature organism or some other relatively stable phase of the organism's life history. Differentiation includes the processes involved in commitment of a cell to a specific fate and its subsequent…	.	251	277	289	115	60	247	262	240	269	154	699	702	794	145	120	143	410	486	494	1.14788	0.138974	5.24414e-14	-0.826664	0.154725	2.34017e-06	0.0471459	0.144643	0.845148	0.341435	0.268791	0.389373
ENSG00000154127	UBASH3B	ubiquitin associated and SH3 domain containing B	Any process that stops, prevents, or reduces the frequency, rate or extent of osteoclast differentiation. [GOC:go_curators];"Any process that decreases the rate, frequency or extent of platelet aggregation. Platelet aggregation is the adhesion of one platelet to one or more other platelets via adhesion molecules." [GOC:BHF];"Any process that stops, prevents, or reduces the frequency, rate or exte…	.	158	241	244	84	74	127	187	167	208	144	145	139	127	94	103	115	150	147	130	-0.877232	0.209994	0.000625883	-0.83519	0.219772	0.00161443	-1.27481	0.205129	3.05139e-08	-0.997731	0.142416	8.57689e-10
ENSG00000162636	FAM102B	family with sequence similarity 102 member B	.	.	2208	2743	2387	802	454	1770	2656	2006	2424	1831	2589	2723	2613	1168	1052	1335	1844	1991	1813	-0.125552	0.204686	0.700961	-0.835431	0.209717	0.000848461	-1.05586	0.206509	9.91851e-06	-0.615464	0.180192	0.008775
ENSG00000197472	ZNF695	zinc finger protein 695	A membrane-bounded organelle of eukaryotic cells in which chromosomes are housed and replicated. In most cells, the nucleus contains all of the cell's chromosomes except the organellar chromosomes, and is the site of RNA synthesis and processing. In some species, or in specialized cell types, RNA metabolism or DNA replication may be absent. [GOC:go_curators];"Interacting selectively and non-coval…	.	642	741	630	265	185	522	646	488	594	411	423	451	412	311	311	341	529	568	502	-0.864532	0.108276	4.34142e-13	-0.839821	0.112907	6.50346e-12	-1.00409	0.100461	4.53618e-21	-0.909698	0.0688637	4.22999e-36
ENSG00000107201	DDX58	DEXD/H-box helicase 58	Any process that activates or increases the frequency, rate, or extent of interferon-beta production. [GOC:mah];"Interacting selectively and non-covalently with an identical protein or proteins." [GOC:jl];"Innate immune responses are defense responses mediated by germline encoded components that directly recognize components of potential pathogens." [GO_REF:0000022, GOC:add, GOC:ebc, GOC:mtg_15no…	negative regulation of innate immune response;double-stranded RNA binding;Singleton-Merten dysplasia;positive regulation of interferon-alpha production;single-stranded RNA binding;Singleton-Merten syndrome;positive regulation of defense response to virus by host;RIG-I signaling pathway;SINGLETON-MERTEN SYNDROME 2;positive regulation of interferon-beta production	916	1174	914	410	182	756	990	800	820	566	829	831	791	505	382	498	589	575	542	-0.461031	0.147058	0.0155499	-0.847594	0.154236	1.08423e-06	-1.43133	0.147234	6.23366e-20	-0.857032	0.159841	6.61994e-06
ENSG00000119950	MXI1	MAX interactor 1, dimerization protein	Any molecular function by which a gene product interacts selectively and non-covalently with DNA (deoxyribonucleic acid). [GOC:dph, GOC:jl, GOC:tb, GOC:vw];"The cellular synthesis of RNA on a template of DNA." [GOC:jl, GOC:txnOH];"A small, dense body one or more of which are present in the nucleus of eukaryotic cells. It is rich in RNA and protein, is not bounded by a limiting membrane, and is no…	PROSTATE CANCER	646	643	603	357	165	764	606	538	613	365	1910	2119	2025	318	310	366	1337	1349	1315	1.29618	0.1486	1.43111e-15	-0.851513	0.157135	1.60873e-06	0.257433	0.14336	0.205616	0.472247	0.280351	0.241552
ENSG00000198088	NUP62CL	.	.	.	222	234	205	122	64	185	158	164	132	130	448	548	596	94	88	124	325	448	421	1.06852	0.163121	6.89734e-09	-0.854589	0.179648	3.72838e-05	0.212858	0.163962	0.386633	0.326205	0.265699	0.407478
ENSG00000170153	RNF150	ring finger protein 150	The component of a membrane consisting of the gene products and protein complexes having at least some part of their peptide sequence embedded in the hydrophobic region of the membrane. [GOC:dos, GOC:go_curators];"Interacting selectively and non-covalently with zinc (Zn) ions." [GOC:ai]	.	696	818	761	211	129	431	577	564	666	444	1027	1096	1057	317	301	306	2184	2509	2546	0.427712	0.192722	0.114079	-0.894561	0.202585	0.000159386	1.15735	0.196956	2.04141e-07	0.444367	0.275442	0.264353
ENSG00000154079	SDHAF4	.	.	.	211	246	175	148	81	339	221	254	238	156	603	758	660	131	107	148	492	556	543	1.01602	0.23597	0.000394695	-0.897992	0.246857	0.00278855	0.240659	0.231503	0.502397	0.312665	0.275243	0.440814
ENSG00000260293	AC106820.4	.	.	.	111	120	96	30	20	53	68	56	66	53	76	73	92	37	45	32	50	65	55	-0.310254	0.214505	0.338839	-0.92655	0.249517	0.00216201	-1.25612	0.2189	4.33013e-07	-0.777516	0.194153	0.00149582
ENSG00000087301	TXNDC16	thioredoxin domain containing 16	Interacting selectively and non-covalently with any protein or protein complex (a complex of two or more proteins that may include other nonprotein molecules). [GOC:go_curators];"Any process that maintains the redox environment of a cell or compartment within a cell." [GOC:ai, GOC:dph, GOC:tb];"The volume enclosed by the membranes of the endoplasmic reticulum." [ISBN:0198547684];"Any process spec…	.	694	890	767	517	280	924	598	497	619	448	2280	2386	2436	411	332	398	1422	1558	1335	1.24287	0.190725	8.32113e-09	-0.928791	0.197565	4.72659e-05	0.0894992	0.187234	0.765357	0.385628	0.292129	0.368417
ENSG00000124610	HIST1H1A	histone cluster 1, H1a	The aggregation, arrangement and bonding together of a nucleosome, the beadlike structural units of eukaryotic chromatin composed of histones and DNA. [GOC:mah];"Any molecular function by which a gene product interacts selectively and non-covalently with DNA (deoxyribonucleic acid)." [GOC:dph, GOC:jl, GOC:tb, GOC:vw];"Interacting selectively and non-covalently with any protein or protein complex …	chromatin DNA binding	1114	1355	1278	456	236	895	865	741	752	564	0	1	5	542	351	529	277	251	228	-8.37279	0.418933	1.7288e-84	-0.93812	0.136066	2.81409e-10	-2.72634	0.124065	1.68781e-103	-1.72374	0.587875	0.028545
ENSG00000113356	POLR3G	RNA polymerase III subunit G	Any process that activates or increases the frequency, rate, or extent of interferon-beta production. [GOC:mah];"Innate immune responses are defense responses mediated by germline encoded components that directly recognize components of potential pathogens." [GO_REF:0000022, GOC:add, GOC:ebc, GOC:mtg_15nov05, GOC:mtg_sensu];"RNA polymerase III, one of three nuclear DNA-directed RNA polymerases fo…	positive regulation of innate immune response;positive regulation of interferon-beta production	1596	2094	1873	888	576	1560	1633	1175	1405	1048	1470	1525	1351	782	745	921	889	876	814	-0.563101	0.106956	6.58413e-06	-0.950396	0.111351	1.39441e-15	-1.76471	0.0984326	1.68903e-68	-1.00592	0.176333	1.30667e-06
ENSG00000227354	RBM26-AS1	.	.	.	93	102	113	53	25	89	77	89	60	64	331	340	355	54	31	45	170	156	138	1.52413	0.165119	2.12735e-17	-0.995686	0.224268	0.000144347	-0.0577346	0.172205	0.841341	0.501863	0.337034	0.304727
ENSG00000130021	PUDP	pseudouridine 5'-phosphatase	Catalysis of the hydrolysis of various bonds, e.g. C-O, C-N, C-C, phosphoric anhydride bonds, etc. Hydrolase is the systematic name for any enzyme of EC class 3. [ISBN:0198506732];"Any process that generates a pyrimidine nucleoside, one of a family of organic molecules consisting of a pyrimidine base covalently bonded to a sugar ribose, from derivatives of it, without de novo synthesis." [GOC:jl]…	.	714	813	793	505	278	825	733	676	645	496	724	805	789	378	347	403	1504	1431	1458	-0.408325	0.163836	0.0683576	-1.00287	0.166113	5.6444e-08	0.0598429	0.154612	0.812788	-0.390934	0.170291	0.0977497
ENSG00000151338	MIPOL1	mirror-image polydactyly 1	A membrane-bounded organelle of eukaryotic cells in which chromosomes are housed and replicated. In most cells, the nucleus contains all of the cell's chromosomes except the organellar chromosomes, and is the site of RNA synthesis and processing. In some species, or in specialized cell types, RNA metabolism or DNA replication may be absent. [GOC:go_curators];"Interacting selectively and non-coval…	.	962	1081	992	434	272	820	739	599	757	600	1083	1144	1160	397	377	449	1306	1431	1291	0.0231914	0.0919939	0.882423	-1.00328	0.102649	2.33411e-20	-0.178329	0.0858295	0.133493	-0.326013	0.155654	0.135528
ENSG00000176124	DLEU1	.	Interacting selectively and non-covalently with any protein or protein complex (a complex of two or more proteins that may include other nonprotein molecules). [GOC:go_curators]	.	267	296	279	108	79	158	198	151	179	125	201	238	240	89	112	104	230	220	205	-0.303	0.154759	0.174791	-1.00358	0.178278	5.29438e-07	-0.805439	0.1446	1.0452e-06	-0.675542	0.142418	0.000105304
ENSG00000197121	PGAP1	post-GPI attachment to proteins 1	The component of a membrane consisting of the gene products and protein complexes having at least some part of their peptide sequence embedded in the hydrophobic region of the membrane. [GOC:dos, GOC:go_curators];"The irregular network of unit membranes, visible only by electron microscopy, that occurs in the cytoplasm of many eukaryotic cells. The membranes form a complex meshwork of tubular cha…	Autosomal recessive spastic paraplegia type 67;Autosomal recessive non-syndromic intellectual disability;Mental retardation autosomal recessive 42	3200	3766	3521	1151	718	2342	1755	1498	1644	1263	3745	3649	3437	1121	1084	1154	3200	3522	2969	0.227098	0.181877	0.417867	-1.00552	0.187717	2.1852e-06	-0.380256	0.182813	0.132957	-0.300136	0.195947	0.290863
ENSG00000020256	ZFP64	ZFP64 zinc finger protein	A membrane-bounded organelle of eukaryotic cells in which chromosomes are housed and replicated. In most cells, the nucleus contains all of the cell's chromosomes except the organellar chromosomes, and is the site of RNA synthesis and processing. In some species, or in specialized cell types, RNA metabolism or DNA replication may be absent. [GOC:go_curators];"Interacting selectively and non-coval…	.	771	745	777	207	120	616	766	612	650	398	671	609	607	285	300	315	673	641	569	-0.391685	0.194977	0.161307	-1.00796	0.20312	1.47464e-05	-0.84526	0.196378	0.000318832	-0.72711	0.145826	3.74423e-05
ENSG00000163884	KLF15	Kruppel like factor 15	Any process that results in a change in state or activity of a cell (in terms of movement, secretion, enzyme production, gene expression, etc.) as a result of a peptide stimulus. [GOC:pr, GOC:TermGenie];"Any process that activates or increases the frequency, rate or extent of cellular DNA-templated transcription." [GOC:go_curators, GOC:txnOH];"Any molecular function by which a gene product intera…	negative regulation of peptidyl-lysine acetylation;positive regulation of transcription from RNA polymerase II promoter	218	203	200	66	42	162	189	128	133	109	163	109	130	70	77	90	283	242	226	-0.687635	0.160237	0.000415703	-1.00875	0.160004	1.17944e-08	-0.248905	0.128696	0.167737	-0.599683	0.144038	0.00088999
ENSG00000101079	NDRG3	NDRG family member 3	All of the contents of a cell excluding the plasma membrane and nucleus, but including other subcellular structures. [ISBN:0198547684];"Elemental activities, such as catalysis or binding, describing the actions of a gene product at the molecular level. A given gene product may exhibit one or more molecular functions." [GOC:go_curators];"The process in which relatively unspecialized cells, e.g. em…	.	872	945	881	410	249	908	816	753	768	503	1776	1738	1940	399	338	456	1816	1844	1812	0.7379	0.0973195	7.51974e-12	-1.01208	0.106931	4.30125e-19	0.293832	0.0880406	0.00822943	0.168129	0.232727	0.64411
ENSG00000164048	ZNF589	zinc finger protein 589	A membrane-bounded organelle of eukaryotic cells in which chromosomes are housed and replicated. In most cells, the nucleus contains all of the cell's chromosomes except the organellar chromosomes, and is the site of RNA synthesis and processing. In some species, or in specialized cell types, RNA metabolism or DNA replication may be absent. [GOC:go_curators];"Interacting selectively and non-coval…	.	3558	3875	3629	896	545	1850	2939	2282	2750	1776	2992	3241	3392	1296	1222	1261	2295	2319	2198	-0.120406	0.206345	0.716714	-1.01495	0.210969	2.93607e-05	-1.06085	0.208217	1.07527e-05	-0.662391	0.190211	0.00727765
ENSG00000113269	RNF130	ring finger protein 130	The component of a membrane consisting of the gene products and protein complexes having at least some part of their peptide sequence embedded in the hydrophobic region of the membrane. [GOC:dos, GOC:go_curators];"Catalysis of the joining of two substances, or two groups within a single molecule, with the concomitant hydrolysis of the diphosphate bond in ATP or a similar triphosphate." [EC:6, GOC…	.	3610	4125	3656	1391	872	3733	2216	1732	1820	1261	7285	7555	8039	1307	1183	1438	4075	4172	3973	1.05966	0.19683	3.7033e-06	-1.01506	0.200809	9.62077e-06	-0.277066	0.195624	0.339868	0.179753	0.290604	0.699542
ENSG00000153046	CDYL	chromodomain Y-like	The cellular synthesis of RNA on a template of DNA. [GOC:jl, GOC:txnOH];"That part of the nuclear content other than the chromosomes or the nucleolus." [GOC:ma, ISBN:0124325653];"Interacting selectively and non-covalently with a repressing transcription factor and also with the basal transcription machinery in order to stop, prevent, or reduce the frequency, rate or extent of transcription. Cofac…	RNA polymerase II transcription corepressor activity	3438	3700	3376	1411	847	3010	1963	1577	1578	1009	5662	5712	5512	1164	1084	1295	3831	3708	3627	0.767933	0.213438	0.00426456	-1.01653	0.218843	6.05109e-05	-0.262241	0.213317	0.414943	0.015309	0.261699	0.974753
ENSG00000163661	PTX3	pentraxin 3	Any process that stops, prevents or reduces the frequency, rate or extent of exo-alpha-sialidase activity. [GO_REF:0000059, GOC:BHF, GOC:rl, GOC:TermGenie, PMID:23544079];"Innate immune responses are defense responses mediated by germline encoded components that directly recognize components of potential pathogens." [GO_REF:0000022, GOC:add, GOC:ebc, GOC:mtg_15nov05, GOC:mtg_sensu];"Any process t…	.	636	699	591	256	150	612	534	373	445	320	488	480	510	234	253	268	1452	1434	1367	-0.494992	0.096407	1.21481e-05	-1.01726	0.111653	1.03524e-17	0.573755	0.0828848	3.66076e-10	-0.152595	0.224878	0.667065
ENSG00000205664	BX890604.1	.	.	.	282	264	294	186	117	414	330	287	287	203	261	251	325	151	146	160	746	709	727	-0.590902	0.215644	0.0407278	-1.01771	0.21532	4.24638e-05	0.327727	0.19931	0.253488	-0.317127	0.220691	0.325076
ENSG00000150867	PIP4K2A	phosphatidylinositol-5-phosphate 4-kinase type 2 alpha	The chemical reactions and pathways resulting in the formation of phosphatidylinositol, any glycophospholipid in which the sn-glycerol 3-phosphate residue is esterified to the 1-hydroxyl group of 1D-myo-inositol. [CHEBI:28874, ISBN:0198506732];"Catalysis of the reaction: ATP + 1-phosphatidyl-1D-myo-inositol 5-phosphate = ADP + 1-phosphatidyl-1D-myo-inositol 4,5-bisphosphate." [EC:2.7.1.149];"The …	autophagosome;Precursor B-cell acute lymphoblastic leukemia;negative regulation of autophagy;positive regulation of autophagosome assembly	1566	1717	1627	487	266	1192	1118	934	940	551	2295	2385	2326	562	473	600	1464	1435	1360	0.625295	0.156628	0.00119749	-1.02299	0.16469	2.0544e-08	-0.535603	0.158627	0.00736512	-0.133643	0.24346	0.735361
ENSG00000169621	APLF	aprataxin and PNKP like factor;prokineticin receptor 1	That part of the nuclear content other than the chromosomes or the nucleolus. [GOC:ma, ISBN:0124325653];"Any process that activates or increases the frequency, rate or extent of DNA ligation, the re-formation of a broken phosphodiester bond in the DNA backbone, carried out by DNA ligase." [GOC:ai];"Interacting selectively and non-covalently with any metal ion." [GOC:ai];"The part of the cytoplasm…	single strand break repair;double-strand break repair	348	391	378	203	121	338	243	204	203	193	707	789	917	152	137	152	401	437	392	0.959946	0.188569	1.48048e-05	-1.02585	0.195232	3.65255e-06	-0.445088	0.178218	0.0633492	0.0723407	0.287871	0.886877
ENSG00000184368	MAP7D2	MAP7 domain containing 2	The part of the cytoskeleton (the internal framework of a cell) composed of microtubules and associated proteins. [GOC:jl, ISBN:0395825172];"A process that is carried out at the cellular level which results in the assembly, arrangement of constituent parts, or disassembly of cytoskeletal structures comprising microtubules and their associated proteins." [GOC:mah];"The action of a molecule that co…	.	186	189	182	68	51	144	185	119	182	113	345	375	395	83	54	97	278	287	269	0.777673	0.139342	1.43756e-06	-1.02946	0.181817	4.47598e-07	-0.0876044	0.132406	0.670616	0.0660455	0.251049	0.881417
ENSG00000153982	GDPD1	glycerophosphodiester phosphodiesterase domain containing 1	The component of a membrane consisting of the gene products and protein complexes having at least some part of their peptide sequence embedded in the hydrophobic region of the membrane. [GOC:dos, GOC:go_curators];"All of the contents of a cell excluding the plasma membrane and nucleus, but including other subcellular structures." [ISBN:0198547684];"Interacting selectively and non-covalently with …	.	431	475	369	99	83	234	264	200	211	159	634	663	624	138	105	153	409	478	448	0.787187	0.185668	0.000502957	-1.03413	0.206863	1.24122e-05	-0.176966	0.190084	0.552536	0.0510012	0.259954	0.912545
ENSG00000166582	CENPV	centromere protein V	That part of the nuclear content other than the chromosomes or the nucleolus. [GOC:ma, ISBN:0124325653];"The area in the center of the spindle where the spindle microtubules from opposite poles overlap." [GOC:ai, PMID:15296749];"The aggregation, arrangement and bonding together of proteins and centromeric DNA molecules to form a centromeric protein-DNA complex. Includes the formation of the chrom…	centromere complex assembly;positive regulation of cytokinesis;pericentric heterochromatin assembly;regulation of chromosome organization	5139	5438	4780	1440	807	5280	2816	2284	2260	1456	5221	5486	5476	1608	1493	1714	5277	5156	5319	0.248976	0.243057	0.517112	-1.03456	0.248021	0.000420855	-0.230931	0.246722	0.550328	-0.246153	0.218909	0.445928
ENSG00000163322	FAM175A	family with sequence similarity 175 member A	Any process that results in a change in state or activity of a cell or an organism (in terms of movement, secretion, enzyme production, gene expression, etc.) as a result of a ionizing radiation stimulus. Ionizing radiation is radiation with sufficient energy to remove electrons from atoms and may arise from spontaneous decay of unstable isotopes, resulting in alpha and beta particles and gamma r…	double-strand break repair;G2 DNA damage checkpoint;cellular response to ionizing radiation;positive regulation of DNA repair	1889	2307	2163	1588	834	2214	2069	1916	1926	1490	4868	5007	4560	1145	874	1165	2800	3184	3147	0.682723	0.194147	0.00533934	-1.04118	0.198548	3.83152e-06	-0.411736	0.191766	0.11958	-0.0770312	0.254936	0.861997
ENSG00000126970	ZC4H2	zinc finger C4H2-type containing	A cellular component that forms a specialized region of connection between two or more cells or between a cell and the extracellular matrix. At a cell junction, anchoring proteins extend through the plasma membrane to link cytoskeletal proteins in one cell to cytoskeletal proteins in neighboring cells or to proteins in the extracellular matrix. [GOC:mah, http://www.vivo.colostate.edu/hbooks/cmb/c…	Arthrogryposis Multiplex Congenita and Intellectual Disability;Intellectual disability-developmental delay-contractures syndrome	708	752	672	180	116	440	408	331	356	214	945	1014	924	252	162	227	1046	1110	1120	0.667241	0.193589	0.00657019	-1.04756	0.212663	1.74855e-05	0.405836	0.195293	0.13341	0.178875	0.251734	0.650268
ENSG00000172292	CERS6	ceramide synthase 6	The component of a membrane consisting of the gene products and protein complexes having at least some part of their peptide sequence embedded in the hydrophobic region of the membrane. [GOC:dos, GOC:go_curators];"The irregular network of unit membranes, visible only by electron microscopy, that occurs in the cytoplasm of many eukaryotic cells. The membranes form a complex meshwork of tubular cha…	.	4601	5113	4850	1296	835	2961	2811	2429	2681	1911	4765	4557	4574	1525	1364	1673	4946	5313	5075	0.111197	0.158838	0.665568	-1.04798	0.164961	8.74098e-09	-0.196092	0.161323	0.421139	-0.300443	0.182102	0.252615
ENSG00000251669	FAM86EP	.	.	.	135	157	184	48	28	115	141	135	119	61	145	105	108	58	53	65	212	206	182	-0.46981	0.211685	0.114079	-1.04964	0.218289	2.96931e-05	-0.187812	0.188222	0.522753	-0.514794	0.168717	0.0215012
ENSG00000145901	TNIP1	TNFAIP3 interacting protein 1	The living contents of a cell; the matter contained within (but not including) the plasma membrane, usually taken to exclude large vacuoles and masses of secretory or ingested material. In eukaryotes it includes the nucleus and cytoplasm. [ISBN:0198506732];"That part of the nuclear content other than the chromosomes or the nucleolus." [GOC:ma, ISBN:0124325653];"The chemical reactions and pathways…	leukocyte cell-cell adhesion	276	261	267	72	50	133	214	152	189	79	244	253	233	74	93	92	282	286	306	-0.023529	0.208293	0.948329	-1.05251	0.234526	0.000118008	-0.212204	0.208178	0.512147	-0.35902	0.191154	0.186399
ENSG00000115365	LANCL1	LanC like 1	Interacting selectively and non-covalently with a SH3 domain (Src homology 3) of a protein, small protein modules containing approximately 50 amino acid residues found in a great variety of intracellular or membrane-associated proteins. [GOC:go_curators, Pfam:PF00018];"Interacting selectively and non-covalently with zinc (Zn) ions." [GOC:ai];"Catalysis of a biochemical reaction at physiological t…	.	2803	3224	2972	1026	537	2949	3372	2793	2929	2155	3566	3902	3600	1359	1093	1438	3471	3637	3465	-0.000536351	0.202721	0.99907	-1.06059	0.206504	6.47291e-06	-0.512368	0.203264	0.0602834	-0.460046	0.184139	0.0677434
ENSG00000267041	ZNF850	zinc finger protein 850	A membrane-bounded organelle of eukaryotic cells in which chromosomes are housed and replicated. In most cells, the nucleus contains all of the cell's chromosomes except the organellar chromosomes, and is the site of RNA synthesis and processing. In some species, or in specialized cell types, RNA metabolism or DNA replication may be absent. [GOC:go_curators];"Interacting selectively and non-coval…	.	3173	3763	3315	745	487	2136	1660	1215	1492	1023	1497	1502	1403	939	871	970	1537	1694	1482	-0.849438	0.239818	0.00497491	-1.0728	0.245686	0.00019452	-1.20381	0.243986	2.24704e-05	-1.04767	0.151178	1.39807e-09
ENSG00000176055	MBLAC2	metallo-beta-lactamase domain containing 2	Catalysis of the hydrolysis of various bonds, e.g. C-O, C-N, C-C, phosphoric anhydride bonds, etc. Hydrolase is the systematic name for any enzyme of EC class 3. [ISBN:0198506732];"Interacting selectively and non-covalently with any metal ion." [GOC:ai];"Elemental activities, such as catalysis or binding, describing the actions of a gene product at the molecular level. A given gene product may ex…	.	430	546	455	203	102	265	291	193	222	164	392	381	339	135	137	175	473	463	343	-0.209689	0.21026	0.530645	-1.07294	0.224729	3.44876e-05	-0.46167	0.213979	0.117709	-0.53958	0.175374	0.0202561
ENSG00000125247	TMTC4	.	.	.	2396	2753	2476	839	466	2275	1251	1264	1225	843	2749	2871	2945	875	703	823	2665	2816	2621	0.304372	0.197662	0.303853	-1.0754	0.203391	3.09293e-06	-0.220825	0.198327	0.468114	-0.223671	0.212985	0.480412
ENSG00000137941	TTLL7	tubulin tyrosine ligase like 7	Interacting selectively and non-covalently with the microtubule constituent protein beta-tubulin. [GOC:krc];"The process in which relatively unspecialized cells, e.g. embryonic or regenerative cells, acquire specialized structural and/or functional features that characterize the cells, tissues, or organs of the mature organism or some other relatively stable phase of the organism's life history. …	.	1132	1242	1108	354	217	668	904	658	897	577	1466	1392	1440	416	358	425	1469	1408	1333	0.317001	0.142231	0.112179	-1.07639	0.150875	5.5833e-11	-0.162148	0.14292	0.45861	-0.195822	0.201432	0.518603
ENSG00000064692	SNCAIP	synuclein alpha interacting protein	Interacting selectively and non-covalently with an identical protein or proteins. [GOC:jl];"Any process that modulates the rate, frequency, or extent of inclusion body assembly. Inclusion body assembly is the aggregation, arrangement and bonding together of a set of components to form an inclusion body." [GOC:BHF, GOC:dph, GOC:tb];"The chemical reactions and pathways involving a specific protein,…	Parkinson disease late-onset	904	941	922	385	213	541	640	597	592	407	970	1051	1003	337	290	341	921	951	960	0.114635	0.127223	0.573422	-1.08343	0.135649	1.13364e-13	-0.428195	0.125127	0.00647368	-0.383897	0.178054	0.122957
ENSG00000251095	AC097478.1	.	.	.	904	927	929	266	162	434	605	492	602	450	164	173	185	313	271	297	980	1032	937	-2.25901	0.187404	6.23905e-30	-1.08523	0.185377	1.56718e-07	-0.244155	0.176302	0.352371	-0.954109	0.269418	0.00618752
ENSG00000179331	RAB39A	RAB39A, member RAS oncogene family	The lipid bilayer surrounding a phagocytic vesicle. [GOC:mah];"The directed movement of proteins into, out of or within a cell, or between cells, by means of some agent such as a transporter or pore." [GOC:ai];"The membrane surrounding a cell that separates the cell from its external environment. It consists of a phospholipid bilayer and associated proteins." [ISBN:0716731363];"Any process that r…	phagosome acidification;phagosome-lysosome fusion	576	653	626	199	124	414	288	240	262	170	401	469	455	182	146	209	483	510	478	-0.229727	0.23222	0.533712	-1.08614	0.243576	0.000133122	-0.528242	0.230544	0.0936517	-0.575415	0.18008	0.0151575
ENSG00000143919	CAMKMT	calmodulin-lysine N-methyltransferase	A process that is carried out at the cellular level which results in the assembly, arrangement of constituent parts, or disassembly of a mitochondrion; includes mitochondrial morphogenesis and distribution, and replication of the mitochondrial genome as well as synthesis of new mitochondrial components. [GOC:dph, GOC:jl, GOC:mah, GOC:sgd_curators, PMID:9786946];"A membrane-bounded organelle of eu…	Atypical hypotonia - cystinuria syndrome;2p21 microdeletion syndrome;2p21 microdeletion syndrome without cystinuria	199	190	205	53	41	92	106	92	138	103	199	209	209	62	53	72	155	180	151	0.174359	0.212247	0.612133	-1.09059	0.239074	8.64504e-05	-0.612655	0.215599	0.0300696	-0.407934	0.215085	0.181369
ENSG00000198168	SVIP	small VCP interacting protein	Any process that stops, prevents, or reduces the frequency, rate or extent of protein complex assembly. [GOC:mah];"Interacting selectively and non-covalently with an ATPase, any enzyme that catalyzes the hydrolysis of ATP." [GOC:ai];"Any process that activates, maintains or increases the rate of autophagy. Autophagy is the process in which cells digest parts of their own cytoplasm." [GOC:dph, GOC…	negative regulation of ER-associated ubiquitin-dependent protein catabolic process;positive regulation of autophagy;protein self-association;positive regulation of protein lipidation;negative regulation of retrograde protein transport ER to cytosol;negative regulation of protein complex assembly	1092	1262	1188	538	297	836	1644	1139	1391	990	1048	1108	1075	484	530	617	2076	2259	2062	-0.557333	0.226249	0.0726572	-1.0936	0.235206	5.9414e-05	-0.0349554	0.225747	0.928475	-0.500725	0.193437	0.0570669
ENSG00000138617	PARP16	poly(ADP-ribose) polymerase family member 16	A lipid bilayer along with all the proteins and protein complexes embedded in it an attached to it. [GOC:dos, GOC:mah, ISBN:0815316194];"Interacting selectively and non-covalently with any protein or protein complex (a complex of two or more proteins that may include other nonprotein molecules)." [GOC:go_curators];"A subcompartment of the endoplasmic reticulum consisting of tubules having membran…	NAD+ ADP-ribosyltransferase activity;endoplasmic reticulum;endoplasmic reticulum unfolded protein response;protein ADP-ribosylation;protein serine/threonine kinase activator activity;positive regulation of protein serine/threonine kinase activity;activation of signaling protein activity involved in unfolded protein response;protein auto-ADP-ribosylation;endoplasmic reticulum tubular network;negat…	181	183	172	62	38	92	133	149	163	68	165	216	221	65	55	71	248	244	241	0.107273	0.216342	0.761295	-1.09365	0.230121	3.8029e-05	-0.0592634	0.201716	0.861488	-0.252866	0.207181	0.410433
ENSG00000197124	ZNF682	zinc finger protein 682	A membrane-bounded organelle of eukaryotic cells in which chromosomes are housed and replicated. In most cells, the nucleus contains all of the cell's chromosomes except the organellar chromosomes, and is the site of RNA synthesis and processing. In some species, or in specialized cell types, RNA metabolism or DNA replication may be absent. [GOC:go_curators];"Interacting selectively and non-coval…	.	1335	1653	1454	514	307	896	831	671	812	603	739	730	644	480	409	501	842	951	881	-0.928066	0.159768	4.48895e-07	-1.09569	0.163294	9.49571e-10	-1.04217	0.157514	2.62357e-09	-1.0286	0.0983084	3.2039e-22
ENSG00000139187	KLRG1	killer cell lectin like receptor G1	The component of a membrane consisting of the gene products and protein complexes having at least some part of their peptide sequence embedded in the hydrophobic region of the membrane. [GOC:dos, GOC:go_curators];"Combining with an extracellular or intracellular messenger to initiate a change in cell activity." [GOC:ceb, ISBN:0198506732];"Innate immune responses are defense responses mediated by …	.	124	120	97	35	34	99	117	94	116	76	130	146	155	35	45	62	123	130	113	0.0467816	0.182213	0.880391	-1.09677	0.229307	3.328e-05	-0.636479	0.174412	0.00323655	-0.478942	0.198411	0.0796186
ENSG00000158528	PPP1R9A	protein phosphatase 1 regulatory subunit 9A	Any process that activates or increases the frequency, rate or extent of long term synaptic depression. [GOC:BHF, GOC:TermGenie];"Any process that modulates the frequency, rate or extent of synapse structural plasticity. Synapse structural plasticity is a type of cytoskeletal remodeling; this remodeling is induced by stimuli that can lead to long term potentiation and it can be activity-dependent…	.	2276	2586	2370	711	446	1224	1159	942	1036	740	2264	2405	2261	694	605	710	3016	3100	3081	0.229985	0.218027	0.503584	-1.09744	0.224528	2.08568e-05	0.188614	0.219777	0.587605	-0.11171	0.225294	0.763922
ENSG00000139263	LRIG3	leucine rich repeats and immunoglobulin like domains 3	The component of a membrane consisting of the gene products and protein complexes having at least some part of their peptide sequence embedded in the hydrophobic region of the membrane. [GOC:dos, GOC:go_curators];"The membrane surrounding a cell that separates the cell from its external environment. It consists of a phospholipid bilayer and associated proteins." [ISBN:0716731363];"That part of a …	.	2915	3133	2895	938	583	2203	1613	1429	1471	970	2643	2802	2958	1002	750	977	3236	3387	3397	0.0754608	0.173531	0.791888	-1.1021	0.180125	3.54756e-08	-0.11968	0.17341	0.65665	-0.298653	0.191323	0.281284
ENSG00000203778	FAM229B	family with sequence similarity 229 member B	.	.	404	486	337	146	103	450	229	208	175	152	840	1021	1096	128	128	151	792	816	815	1.27123	0.228195	1.51329e-06	-1.10334	0.238652	6.66768e-05	0.551886	0.221837	0.0644854	0.521726	0.311156	0.24405
ENSG00000069493	CLEC2D	C-type lectin domain family 2 member D	The irregular network of unit membranes, visible only by electron microscopy, that occurs in the cytoplasm of many eukaryotic cells. The membranes form a complex meshwork of tubular channels, which are often expanded into slitlike cavities called cisternae. The ER takes two forms, rough (or granular), with ribosomes adhering to the outer surface, and smooth (with no ribosomes attached). [ISBN:019…	.	257	266	208	91	72	177	130	137	215	135	303	298	248	95	91	76	271	283	296	0.128282	0.179844	0.658772	-1.10707	0.20318	1.37575e-06	-0.315344	0.172707	0.196594	-0.345796	0.197908	0.222533
ENSG00000165209	STRBP	spermatid perinuclear RNA binding protein	Any molecular function by which a gene product interacts selectively and non-covalently with DNA (deoxyribonucleic acid). [GOC:dph, GOC:jl, GOC:tb, GOC:vw];"The biological process whose specific outcome is the progression of a multicellular organism over time from an initial condition (e.g. a zygote or a young adult) to a later condition (e.g. a multicellular animal or an aged adult)." [GOC:dph, …	.	3002	3654	3245	1858	1053	3099	2935	2420	2840	1937	4188	4172	4324	1402	1179	1599	5781	5975	6012	0.0525538	0.119162	0.788775	-1.10782	0.126195	1.9232e-16	0.0893331	0.113501	0.621502	-0.229138	0.187737	0.410433
ENSG00000184602	SNN	stannin	The outer, i.e. cytoplasm-facing, lipid bilayer of the mitochondrial envelope. [GOC:ai];"A lipid bilayer along with all the proteins and protein complexes embedded in it an attached to it. [GOC:dos, GOC:mah, ISBN:0815316194]";"The component of a membrane consisting of the gene products and protein complexes having at least some part of their peptide sequence embedded in the hydrophobic region of …	.	2787	2931	2531	655	373	2140	1710	1297	1374	875	2699	2531	2752	826	696	866	3387	3256	2962	0.169133	0.211585	0.62334	-1.11644	0.217197	6.35777e-06	-0.0144764	0.214459	0.96993	-0.219288	0.213281	0.491182
ENSG00000049192	ADAMTS6	ADAM metallopeptidase with thrombospondin type 1 motif 6	Catalysis of the hydrolysis of internal, alpha-peptide bonds in a polypeptide chain by a mechanism in which water acts as a nucleophile, one or two metal ions hold the water molecule in place, and charged amino acid side chains are ligands for the metal ions. [GOC:mah, http://merops.sanger.ac.uk/about/glossary.htm#CATTYPE, http://merops.sanger.ac.uk/about/glossary.htm#ENDOPEPTIDASE];"The progress…	.	241	274	256	127	61	223	125	141	157	104	627	767	768	88	94	78	235	214	211	1.45043	0.190459	6.04318e-12	-1.12063	0.218082	6.39438e-06	-0.685292	0.189969	0.00368083	0.331099	0.362474	0.547351
ENSG00000141404	GNAL	G protein subunit alpha L	The series of events required for an organism to receive an olfactory stimulus, convert it to a molecular signal, and recognize and characterize the signal. Olfaction involves the detection of chemical composition of an organism's ambient medium by chemoreceptors. This is a neurological process. [GOC:ai, http://www.onelook.com/];"Conveys a signal across a cell to trigger a change in cell function…	Autosomal dominant focal dystonia DYT25;DYSTONIA 25	436	460	472	202	121	483	553	533	551	394	1042	921	1073	253	166	236	611	626	562	0.630097	0.213018	0.024551	-1.12315	0.22634	1.47464e-05	-0.558511	0.211578	0.0474303	-0.153313	0.266155	0.721796
ENSG00000244879	GABPB1-AS1	.	.	.	2733	2758	2237	1433	962	3420	2356	2104	3373	2325	4343	4176	3805	1395	1143	1219	2854	3130	2794	0.126271	0.209542	0.706689	-1.1298	0.212759	2.76077e-06	-0.802178	0.206609	0.00148814	-0.496519	0.214552	0.0948879
ENSG00000065923	SLC9A7	.	.	.	380	398	385	210	139	413	342	311	342	234	834	748	819	171	156	167	611	721	681	0.694885	0.129983	4.48556e-06	-1.13285	0.143365	2.13509e-13	-0.00458797	0.126906	0.983401	0.0220484	0.244713	0.960718
ENSG00000096060	FKBP5	FK506 binding protein 5	The process of inhibiting aggregation and assisting in the covalent and noncovalent assembly of single chain polypeptides or multisubunit complexes into the correct tertiary structure that is dependent on interaction with a chaperone. [GOC:dph, GOC:vw];"The process of assisting in the covalent and noncovalent assembly of single chain polypeptides or multisubunit complexes into the correct tertiar…	MAJOR DEPRESSIVE DISORDER	388	445	496	212	174	448	365	319	367	269	914	893	845	187	175	185	274	263	249	0.688572	0.142703	4.76722e-05	-1.133	0.15613	2.38456e-11	-1.50208	0.143079	3.1639e-23	-0.305576	0.314723	0.519196
ENSG00000133627	ACTR3B	ARP3 actin related protein 3 homolog B	The actin nucleation process in which actin monomers combine to form a new branch on the side of an existing actin filament; mediated by the Arp2/3 protein complex and its interaction with other proteins. [GOC:mah, PMID:16959963, PMID:18640983];"All of the contents of a cell excluding the plasma membrane and nucleus, but including other subcellular structures." [ISBN:0198547684];"Elemental activi…	.	354	407	375	121	54	278	239	192	203	133	386	415	391	111	124	104	420	420	409	0.210558	0.173714	0.432859	-1.13612	0.201491	5.0614e-07	-0.170856	0.172233	0.525288	-0.251839	0.208739	0.416786
ENSG00000134986	NREP	neuronal regeneration related protein	A membrane-bounded organelle of eukaryotic cells in which chromosomes are housed and replicated. In most cells, the nucleus contains all of the cell's chromosomes except the organellar chromosomes, and is the site of RNA synthesis and processing. In some species, or in specialized cell types, RNA metabolism or DNA replication may be absent. [GOC:go_curators];"All of the contents of a cell excludi…	.	8764	9805	8460	2753	1778	6802	4771	4062	4020	2479	11670	12290	12163	2614	2277	2898	11243	11566	11718	0.614167	0.20433	0.0218678	-1.13746	0.209528	1.52903e-06	0.107205	0.206107	0.742868	0.0281148	0.250537	0.950615
ENSG00000124243	BCAS4	breast carcinoma amplified sequence 4	A protein complex required for the biogenesis of specialized organelles of the endosomal-lysosomal system, such as melanosomes and platelet dense granules. Many of the protein subunits are conserved between mouse and human; the mouse complex contains the Pallidin, Muted, Cappuccino, Dysbindin, Snapin, BLOS1, BLOS2, AND BLOS3 proteins. [PMID:15102850];"The directed movement of substances within a …	.	457	500	385	115	90	438	377	311	346	216	715	779	637	191	114	173	295	374	334	0.570119	0.159041	0.00440941	-1.13918	0.183359	2.04241e-08	-0.956068	0.163795	2.53021e-07	-0.27364	0.272513	0.502664
ENSG00000124508	BTN2A2	butyrophilin subfamily 2 member A2	The component of a membrane consisting of the gene products and protein complexes having at least some part of their peptide sequence embedded in the hydrophobic region of the membrane. [GOC:dos, GOC:go_curators];"Any process that stops, prevents, or reduces the frequency, rate or extent of the chemical reactions and pathways by which individual cells transform chemical substances." [GOC:mah];"In…	.	143	149	123	66	48	104	127	133	142	77	252	264	266	59	58	54	356	310	355	0.589026	0.169551	0.00606072	-1.14048	0.204028	6.53694e-07	0.526653	0.166379	0.0132161	0.166725	0.255415	0.681097
ENSG00000108984	MAP2K6	mitogen-activated protein kinase kinase 6	Any process that results in a change in state or activity of an organism (in terms of movement, secretion, enzyme production, gene expression, etc.) as a result of a inadequate blood supply. [GOC:hjd];"The cellular synthesis of RNA on a template of DNA." [GOC:jl, GOC:txnOH];"Any series of molecular signals generated as a consequence of binding to a nucleotide-binding oligomerization domain contai…	.	826	921	929	337	202	707	503	463	462	382	1105	1197	1210	261	281	310	738	791	766	0.441431	0.148375	0.0234666	-1.14536	0.162848	1.10621e-10	-0.61605	0.147214	0.000501885	-0.280469	0.23363	0.419055
ENSG00000154511	FAM69A	family with sequence similarity 69 member A	The component of a membrane consisting of the gene products and protein complexes having at least some part of their peptide sequence embedded in the hydrophobic region of the membrane. [GOC:dos, GOC:go_curators];"Interacting selectively and non-covalently with any protein or protein complex (a complex of two or more proteins that may include other nonprotein molecules)." [GOC:go_curators];"The l…	.	215	249	239	171	82	276	286	255	288	198	479	390	396	123	93	138	283	320	335	0.22607	0.21634	0.507982	-1.15609	0.229327	1.01997e-05	-0.640395	0.214132	0.0209709	-0.406904	0.227433	0.210769
ENSG00000103021	CCDC113	coiled-coil domain containing 113	All of the contents of a cell excluding the plasma membrane and nucleus, but including other subcellular structures. [ISBN:0198547684];"Interacting selectively and non-covalently with any protein or protein complex (a complex of two or more proteins that may include other nonprotein molecules)." [GOC:go_curators];"The assembly of a cilium, a specialized eukaryotic organelle that consists of a fil…	cilium assembly;centriolar satellite	270	367	323	116	87	302	175	196	221	104	875	806	905	128	94	96	517	536	528	1.39122	0.179704	2.49856e-12	-1.16126	0.207781	6.56617e-07	0.245779	0.178601	0.355539	0.485902	0.3229	0.299445
ENSG00000214960	ISPD	isoprenoid synthase domain containing	The chemical reactions and pathways resulting in the formation of any isoprenoid compound, isoprene (2-methylbuta-1,3-diene) or compounds containing or derived from linked isoprene (3-methyl-2-butenylene) residues. [ISBN:0198506732];"A protein modification process that results in the addition of a carbohydrate or carbohydrate derivative unit to a protein amino acid, e.g. the addition of glycan ch…	MUSCULAR DYSTROPHY-DYSTROGLYCANOPATHY (LIMB-GIRDLE) TYPE C 7;Walker-Warburg syndrome;MUSCULAR DYSTROPHY-DYSTROGLYCANOPATHY (CONGENITAL WITH BRAIN AND EYE ANOMALIES) TYPE A 7;Autosomal recessive limb-girdle muscular dystrophy type 2U;protein O-linked mannosylation;Congenital muscular dystrophy without intellectual disability	211	248	201	108	67	169	138	118	125	119	157	141	156	71	74	82	105	93	83	-0.611093	0.174146	0.00547603	-1.16418	0.192063	4.91881e-08	-1.74713	0.178953	4.22928e-20	-1.10854	0.188439	5.37601e-07
ENSG00000127418	FGFRL1	fibroblast growth factor receptor-like 1	The component of a membrane consisting of the gene products and protein complexes having at least some part of their peptide sequence embedded in the hydrophobic region of the membrane. [GOC:dos, GOC:go_curators];"The process of creating protein oligomers, compounds composed of a small number, usually between three and ten, of identical component monomers. Oligomers may be formed by the polymeriz…	positive regulation of protein homooligomerization;heparin binding;Wolf-Hirschhorn syndrome;cell-cell adhesion via plasma-membrane adhesion molecules	1184	1016	942	316	206	932	633	453	456	347	878	649	764	290	286	337	715	569	565	-0.302684	0.214397	0.35176	-1.17804	0.215525	1.2649e-06	-1.056	0.213211	2.05886e-05	-0.791175	0.184099	0.000551827
ENSG00000141480	ARRB2	arrestin beta 2	Any process that modulates the rate, frequency, or extent of the androgen receptor signaling pathway. [GOC:dph];"A series of molecular signals initiated by the binding of an extracellular ligand to a transforming growth factor beta receptor on the surface of a target cell, and ending with regulation of a downstream cellular process, e.g. transcription." [GOC:BHF, GOC:mah, GOC:signaling];"Interact…	positive regulation of ERK1 and ERK2 cascade;G-protein coupled receptor internalization;proteasome-mediated ubiquitin-dependent protein catabolic process;desensitization of G-protein coupled receptor protein signaling pathway by arrestin;negative regulation of natural killer cell mediated cytotoxicity;positive regulation of receptor internalization;negative regulation of protein ubiquitination in…	473	479	439	133	71	342	329	311	306	175	771	731	811	149	123	160	679	619	645	0.780309	0.155696	2.13782e-05	-1.18512	0.174118	5.04584e-10	0.0840157	0.157166	0.734992	0.108339	0.26313	0.808089
ENSG00000143995	MEIS1	Meis homeobox 1	The specific movement from place to place of an organism in response to external or internal stimuli. Locomotion of a whole organism in a manner dependent upon some combination of that organism's internal state and external conditions. [GOC:dph];"The process whose specific outcome is the progression of the myeloid and lymphoid derived organ/tissue systems of the blood and other parts of the body …	.	8961	9706	8740	2120	1299	4500	4796	3988	4257	2617	10092	10391	10090	2403	2049	2500	7982	8358	8237	0.485794	0.225953	0.127984	-1.18527	0.232077	7.44364e-06	-0.267027	0.230375	0.447552	-0.165185	0.249569	0.67585
ENSG00000126878	AIF1L	allograft inflammatory factor 1 like	Interacting selectively and non-covalently with calcium ions (Ca2+). [GOC:ai];"A filamentous structure formed of a two-stranded helical polymer of the protein actin and associated proteins. Actin filaments are a major component of the contractile apparatus of skeletal muscle and the microfilaments of the cytoskeleton of eukaryotic cells. The filaments, comprising polymerized globular actin molecu…	.	2541	2519	2256	649	465	2091	1636	1513	1454	805	2893	2936	3108	694	724	807	4082	3788	3773	0.360692	0.166119	0.123425	-1.18698	0.174276	4.91095e-10	0.29187	0.166812	0.219574	-0.0261521	0.233293	0.950615
ENSG00000149294	NCAM1	neural cell adhesion molecule 1	The external part of the cell wall and/or plasma membrane. [GOC:jl, GOC:mtg_sensu, GOC:sm];"The attachment of a cell, either to another cell or to an underlying substrate such as the extracellular matrix, via cell adhesion molecules." [GOC:hb, GOC:pf];"A lipid bilayer along with all the proteins and protein complexes embedded in it an attached to it." [GOC:dos, GOC:mah, ISBN:0815316194];"The proc…	.	2659	3019	3204	1024	635	1799	1986	1882	1903	1233	6137	5998	6173	947	878	962	2778	2936	2636	1.07281	0.12182	7.10992e-16	-1.18904	0.129088	4.34703e-18	-0.504181	0.122704	0.000665255	0.10998	0.303393	0.831956
ENSG00000120915	EPHX2	epoxide hydrolase 2	Any process that increases the frequency, rate or extent of gene expression. Gene expression is the process in which a gene's coding sequence is converted into a mature gene product or products (proteins or RNA). This includes the production of an RNA transcript as well as any processing to produce a mature RNA product or an mRNA (for protein-coding genes) and the translation of that mRNA into pr…	regulation of cholesterol metabolic process;HYPERCHOLESTEROLEMIA FAMILIAL	341	407	373	119	85	436	217	191	189	109	978	1057	1197	117	101	128	976	1031	1046	1.5401	0.231892	3.95534e-09	-1.19128	0.246955	2.77601e-05	1.02489	0.229994	0.000176796	0.815438	0.341654	0.0835249
ENSG00000186153	WWOX	WW domain containing oxidoreductase	The formation of a protein dimer, a macromolecular structure consists of two noncovalently associated identical or nonidentical subunits. [ISBN:0198506732];"The chemical reactions and pathways involving steroids, compounds with a 1,2,cyclopentanoperhydrophenanthrene nucleus." [ISBN:0198547684];"Any process that activates or increases the frequency, rate or extent of extrinsic apoptotic signaling …	Autosomal recessive cerebellar ataxia-epilepsy-intellectual disability syndrome due to WWOX deficiency;46XY partial gonadal dysgenesis;Spinocerebellar ataxia autosomal recessive 12;Undetermined early-onset epileptic encephalopathy;EPILEPTIC ENCEPHALOPATHY EARLY INFANTILE 28	728	847	662	196	153	572	353	309	330	231	942	914	923	207	194	206	956	933	941	0.530388	0.216323	0.0742979	-1.19382	0.228145	4.04787e-06	0.113747	0.217588	0.741579	-0.0161219	0.25238	0.972338
ENSG00000186310	NAP1L3	nucleosome assembly protein 1 like 3	A membrane-bounded organelle of eukaryotic cells in which chromosomes are housed and replicated. In most cells, the nucleus contains all of the cell's chromosomes except the organellar chromosomes, and is the site of RNA synthesis and processing. In some species, or in specialized cell types, RNA metabolism or DNA replication may be absent. [GOC:go_curators];"The aggregation, arrangement and bond…	.	797	1015	860	514	240	1129	950	670	749	549	1103	1165	1204	337	319	449	1372	1396	1310	0.00883837	0.157398	0.974846	-1.19569	0.171131	1.51331e-10	-0.208975	0.151148	0.353248	-0.377445	0.189736	0.159285
ENSG00000138443	ABI2	abl-interactor 2	The binding activity of a molecule that brings together a cytoskeletal protein and one or more other molecules, permitting them to function in a coordinated way. [GOC:mtg_MIT_16mar07];"A series of molecular signals within the cell that are mediated by a member of the Rac family of proteins switching to a GTP-bound active state." [GOC:bf];"The phosphorylation of peptidyl-tyrosine to form peptidyl-…	.	4976	6154	5668	1480	965	3324	2774	2666	2665	1784	7209	6655	7225	1504	1387	1588	6468	7233	6831	0.57612	0.19485	0.0246024	-1.19611	0.200143	8.00412e-08	0.0932881	0.19783	0.768735	-0.00395492	0.250445	0.993476
ENSG00000065675	PRKCQ	protein kinase C theta	Any process that modulates the rate, frequency or extent of platelet aggregation. Platelet aggregation is the adhesion of one platelet to one or more other platelets via adhesion molecules. [GOC:dph, GOC:tb];"The proteolytic cleavage of transmembrane proteins and release of their ectodomain (extracellular domain)." [GOC:jl, http://www.copewithcytokines.de/];"Any process that activates or increase…	negative regulation of insulin receptor signaling pathway;positive regulation of telomere maintenance via telomerase;positive regulation of telomere capping;positive regulation of telomerase activity;negative regulation of T cell apoptotic process;positive regulation of endothelial cell chemotaxis by VEGF-activated vascular endothelial growth factor receptor signaling pathway	468	514	441	132	79	383	392	364	324	188	469	504	526	139	139	178	406	405	433	0.0557441	0.164718	0.839228	-1.20838	0.182451	1.65071e-09	-0.658131	0.16636	0.00116201	-0.498997	0.199127	0.0667917
ENSG00000228801	AC064807.1	.	.	.	104	101	85	32	20	88	101	83	87	53	222	201	229	38	34	34	203	217	197	0.926273	0.163373	9.25974e-07	-1.22532	0.215103	3.73666e-07	0.399196	0.152969	0.0502992	0.290337	0.284434	0.495443
ENSG00000100285	NEFH	neurofilament heavy polypeptide	A process that is carried out at the cellular level which results in the assembly, arrangement of constituent parts, or disassembly of cytoskeletal structures comprising neurofilaments and their associated proteins. [GOC:dph];"De novo generation of a long process of a neuron, that carries efferent (outgoing) action potentials from the cell body towards target cells. Refers to the morphogenesis or…	Charcot-Marie-Tooth disease axonal type 2CC;structural molecule activity;regulation of organelle transport along microtubule;AMYOTROPHIC LATERAL SCLEROSIS 1;neurofilament bundle assembly;Amyotrophic lateral sclerosis;axon development	189	259	262	104	67	137	273	212	256	171	164	140	157	85	79	113	250	236	219	-0.938525	0.226472	0.000707691	-1.23592	0.240221	6.24268e-06	-0.786684	0.218953	0.00385245	-0.979736	0.148439	9.59081e-09
ENSG00000177076	ACER2	alkaline ceramidase 2	The chemical reactions and pathways involving ceramides, any N-acylated sphingoid. [ISBN:0198547684];"Catalysis of the reaction: a dihydroceramide + H2O = a fatty acid + dihydrosphingosine." [GOC:mah, PMID:10900202];"Any process that results in a change in state or activity of a cell or an organism (in terms of movement, secretion, enzyme production, gene expression, etc.) as a result of a retino…	activation of cysteine-type endopeptidase activity involved in apoptotic process;negative regulation of protein glycosylation in Golgi;positive regulation of cell death	281	264	240	63	38	112	170	155	149	98	144	130	217	76	60	75	216	196	208	-0.462667	0.250251	0.204651	-1.23724	0.244734	9.6015e-06	-0.583584	0.225826	0.0529988	-0.721885	0.182246	0.00171924
ENSG00000110318	CEP126	centrosomal protein 126	All of the contents of a cell excluding the plasma membrane and nucleus, but including other subcellular structures. [ISBN:0198547684];"A structure comprised of a core structure (in most organisms, a pair of centrioles) and peripheral material from which a microtubule-based structure, such as a spindle apparatus, is organized. Centrosomes occur close to the nucleus during interphase in many eukar…	mitotic spindle organization;cilium assembly;cytoplasmic microtubule organization;Monomelic amyotrophy	144	188	148	79	67	98	133	108	134	95	378	323	341	65	40	71	224	234	215	0.871985	0.186392	8.92752e-05	-1.2379	0.229823	1.88759e-06	-0.194216	0.179941	0.483802	0.0407905	0.291681	0.937367
ENSG00000213079	SCAF8	SR-related CTD associated factor 8	Interacting selectively and non-covalently with an RNA polymerase core enzyme, containing a specific subunit composition defined as the core enzyme. [GOC:jl, GOC:txnOH];"That part of the nuclear content other than the chromosomes or the nucleolus." [GOC:ma, ISBN:0124325653];"Interacting selectively and non-covalently with a nucleotide, any compound consisting of a nucleoside that is esterified wi…	.	3512	4044	3919	1175	671	1935	2132	1819	1903	1131	3124	3229	3374	1000	924	1053	4710	4875	4781	0.00342266	0.19622	0.992282	-1.2496	0.201917	2.34627e-08	0.113011	0.197657	0.715721	-0.261145	0.219113	0.422222
ENSG00000248590	GLDCP1	.	.	.	245	267	229	126	66	257	201	179	206	136	360	352	323	86	79	106	301	318	333	0.235824	0.120008	0.173021	-1.25049	0.14793	2.71815e-15	-0.332322	0.116125	0.0286218	-0.326017	0.208498	0.280514
ENSG00000188177	ZC3H6	zinc finger CCCH-type containing 6	Interacting selectively and non-covalently with any metal ion. [GOC:ai];"Elemental activities, such as catalysis or binding, describing the actions of a gene product at the molecular level. A given gene product may exhibit one or more molecular functions." [GOC:go_curators];"The part of a cell or its extracellular environment in which a gene product is located. A gene product may be located in on…	.	252	321	293	153	95	201	224	255	258	164	907	987	886	117	81	123	613	622	575	1.40444	0.159617	7.44429e-16	-1.25271	0.188556	1.44724e-09	0.345893	0.154158	0.101453	0.499719	0.326414	0.291116
ENSG00000137821	LRRC49	leucine rich repeat containing 49	All of the contents of a cell excluding the plasma membrane and nucleus, but including other subcellular structures. [ISBN:0198547684];"Any of the long, generally straight, hollow tubes of internal diameter 12-15 nm and external diameter 24 nm found in a wide variety of eukaryotic cells; each consists (usually) of 13 protofilaments of polymeric tubulin, staggered in such a manner that the tubulin…	.	974	1321	1049	598	377	1054	718	587	675	477	2013	2171	2109	399	306	420	1805	1922	1883	0.767353	0.192984	0.00126129	-1.25655	0.202345	2.06954e-08	0.16177	0.18933	0.588949	0.104721	0.273512	0.822208
ENSG00000168004	HRASLS5	HRAS like suppressor family member 5	Catalysis of the transfer of an acyl group to a nitrogen atom on the acceptor molecule. [GOC:ai];"The chemical reactions and pathways involving N-acylphosphatidylethanolamines. An N-acylphosphatidylethanolamine is a phosphatidylethanolamine substituted at nitrogen by an acyl group." [GOC:elh, GOC:mah, PMID:14634025, PMID:15878693]	.	123	134	130	64	33	139	117	102	119	68	46	45	38	41	44	59	138	146	161	-1.84252	0.186709	5.87858e-20	-1.25739	0.187523	9.7853e-10	-0.528796	0.144696	0.00318359	-1.09286	0.203169	6.17934e-06
ENSG00000247809	NR2F2-AS1	.	.	.	214	215	178	50	41	106	125	118	146	99	284	269	318	67	56	50	211	191	221	0.588945	0.18377	0.0129933	-1.27376	0.219703	2.1223e-07	-0.333438	0.187	0.209441	-0.13429	0.264397	0.757643
ENSG00000136828	RALGPS1	Ral GEF with PH domain and SH3 binding motif 1	The membrane surrounding a cell that separates the cell from its external environment. It consists of a phospholipid bilayer and associated proteins. [ISBN:0716731363];"Stimulates the exchange of guanyl nucleotides associated with a GTPase. Under normal cellular physiological conditions, the concentration of GTP is higher than that of GDP, favoring the replacement of GDP by GTP in association wit…	.	209	255	205	77	83	158	140	94	124	82	443	373	422	70	70	56	369	364	386	0.899434	0.20975	0.000420561	-1.27447	0.243515	4.03208e-06	0.316905	0.204497	0.287249	0.217886	0.295494	0.636459
ENSG00000125354	SEPT6	septin 6	The array of microtubules and associated molecules that forms between opposite poles of a eukaryotic cell during mitosis or meiosis and serves to move the duplicated chromosomes apart. [ISBN:0198547684];"The division of the cytoplasm and the plasma membrane of a cell and its partitioning into two daughter cells." [GOC:mtg_cell_cycle];"The cleavage furrow is a plasma membrane invagination at the c…	.	1717	1824	1710	591	352	1242	1575	1369	1513	918	4672	5052	5448	606	520	613	3103	3008	3076	1.39368	0.134334	5.10295e-22	-1.27579	0.136998	1.73128e-18	0.227337	0.131632	0.226652	0.469554	0.322808	0.31817
ENSG00000225178	RPSAP58	.	.	.	830	1348	1182	441	263	1415	934	961	1008	603	1095	1243	1649	457	312	459	1115	1149	1162	-0.0212027	0.195337	0.950391	-1.27722	0.189629	8.04195e-10	-0.685307	0.176841	0.0015271	-0.565842	0.202915	0.0381278
ENSG00000082458	DLG3	discs large MAGUK scaffold protein 3	An occluding cell-cell junction that is composed of a branching network of sealing strands that completely encircles the apical end of each cell in an epithelial sheet; the outer leaflets of the two interacting plasma membranes are seen to be tightly apposed where sealing strands are present. Each sealing strand is composed of a long row of transmembrane adhesion proteins embedded in each of the …	mental retardation X-linked type 90 (MRX90);X-linked non-syndromic intellectual disability;MENTAL RETARDATION X-LINKED 90	1334	1396	1320	488	314	1085	1199	1126	1071	569	1544	1686	1778	421	444	478	1655	1614	1633	0.168677	0.123905	0.371042	-1.27798	0.131725	4.61649e-20	-0.311349	0.118842	0.0493374	-0.352069	0.203746	0.227699
ENSG00000069667	RORA	RAR related orphan receptor A	Any process that results in a change in state or activity of a cell (in terms of movement, secretion, enzyme production, gene expression, etc.) as a result of a tumor necrosis factor stimulus. [GOC:mah];"Any process that activates or increases the frequency, rate or extent of a circadian rhythm behavior." [GOC:go_curators];"The process in which neuroblasts acquire specialized structural and/or fu…	cellular response to sterol;cellular response to hypoxia;angiogenesis;positive regulation of muscle cell differentiation;negative regulation of inflammatory response;triglyceride homeostasis;positive regulation of vascular endothelial growth factor production;negative regulation of I-kappaB kinase/NF-kappaB signaling	381	424	402	160	138	200	265	247	341	252	678	747	606	142	115	140	241	319	262	0.611936	0.201384	0.0201648	-1.27923	0.213304	7.10059e-08	-1.12165	0.205953	1.9504e-06	-0.31517	0.301077	0.482093
ENSG00000169083	AR	androgen receptor	The formation of a protein dimer, a macromolecular structure consists of two noncovalently associated identical or nonidentical subunits. [ISBN:0198506732];"The process in which the anatomical structures of male genitalia are generated and organized." [GOC:ems, ISBN:0140512888];"The union of male and female gametes to form a zygote." [GOC:ems, GOC:mtg_sensu];"Any process that activates or increas…	negative regulation of cell proliferation;Familial hypospadias;positive regulation of NF-kappaB transcription factor activity;positive regulation of cell differentiation;Spinal and Bulbar Muscular Atrophy;Complete androgen insensitivity syndrome;positive regulation of transcription from RNA polymerase II promoter;ANDROGEN INSENSITIVITY PARTIAL;ANDROGEN INSENSITIVITY SYNDROME;PROSTATE CANCER;posit…	228	282	286	76	72	149	174	141	172	116	357	333	351	67	82	79	357	324	262	0.439619	0.160395	0.0406668	-1.28524	0.196469	2.73854e-09	-0.15299	0.167264	0.561088	-0.167781	0.243077	0.661247
ENSG00000185532	PRKG1	protein kinase, cGMP-dependent, type I	Catalysis of the phosphorylation of an amino acid residue in a protein, usually according to the reaction: a protein + ATP = a phosphoprotein + ADP. [MetaCyc:PROTEIN-KINASE-RXN];"A process that is carried out at the cellular level which results in the assembly, arrangement of constituent parts, or disassembly of cytoskeletal structures comprising actin filaments and their associated proteins." [G…	Aortic aneurysm familial thoracic 8;negative regulation of platelet aggregation;Familial thoracic aortic aneurysm and aortic dissection;negative regulation of GTPase activity	1003	1175	1086	486	260	1043	1275	1019	1148	884	1731	1634	1687	388	414	486	1944	2002	1847	0.225838	0.176402	0.404419	-1.28663	0.187316	3.3372e-10	-0.0256688	0.174349	0.932133	-0.225644	0.225227	0.50378
ENSG00000137571	SLCO5A1	solute carrier organic anion transporter family member 5A1	Catalysis of the transfer of organic anions from one side of a membrane to the other, in a sodium independent manner. [GOC:go_curators];"The component of the plasma membrane consisting of the gene products and protein complexes having at least some part of their peptide sequence embedded in the hydrophobic region of the membrane." [GOC:dos, GOC:go_curators];"The directed, sodium-independent, move…	.	904	1094	981	254	169	631	494	340	413	300	655	625	673	203	250	252	763	691	642	-0.291847	0.231512	0.412928	-1.29613	0.248535	4.41661e-06	-0.639656	0.234607	0.0393311	-0.686441	0.194236	0.00631893
ENSG00000162687	KCNT2	potassium sodium-activated channel subfamily T member 2	A process in which a potassium ion is transported from one side of a membrane to the other. [GOC:mah];"Enables the calcium concentration-regulatable energy-independent passage of potassium ions across a lipid bilayer down a concentration gradient." [GOC:dph, GOC:mtg_transport];"A protein complex that forms a transmembrane channel through which potassium ions may cross a cell membrane in response …	.	379	437	385	205	161	483	452	306	464	319	1001	989	976	184	173	138	820	775	739	0.796004	0.176638	0.000181004	-1.31378	0.201665	3.22125e-09	0.00917643	0.172807	0.976246	0.0618507	0.279995	0.900649
ENSG00000128833	MYO5C	myosin VC	A protein complex, formed of one or more myosin heavy chains plus associated light chains and other proteins, that functions as a molecular motor; uses the energy of ATP hydrolysis to move actin filaments or to move vesicles or other cargo on fixed actin filaments; has magnesium-ATPase activity and binds actin. Myosin classes are distinguished based on sequence features of the motor, or head, dom…	.	138	180	176	69	52	133	152	115	138	101	289	237	243	60	46	64	316	337	295	0.411048	0.135909	0.0209405	-1.31619	0.168247	3.91978e-13	0.264081	0.116917	0.0992269	-0.0427301	0.24395	0.922365
ENSG00000157445	CACNA2D3	calcium voltage-gated channel auxiliary subunit alpha2delta 3	Enables the transmembrane transfer of an ion by a voltage-gated channel. An ion is an atom or group of atoms carrying an electric charge by virtue of having gained or lost one or more electrons. A voltage-gated channel is a channel whose open state is dependent on the voltage across the membrane in which it is embedded. [GOC:mtg_transport, ISBN:0198506732, ISBN:0815340729];"Enables the facilitate…	.	101	128	105	38	36	60	122	75	83	73	80	109	105	35	37	37	179	134	146	-0.354881	0.221148	0.279481	-1.32654	0.243776	1.42826e-06	-0.168769	0.206787	0.607229	-0.527888	0.204528	0.0578497
ENSG00000181450	ZNF678	zinc finger protein 678	A membrane-bounded organelle of eukaryotic cells in which chromosomes are housed and replicated. In most cells, the nucleus contains all of the cell's chromosomes except the organellar chromosomes, and is the site of RNA synthesis and processing. In some species, or in specialized cell types, RNA metabolism or DNA replication may be absent. [GOC:go_curators];"Interacting selectively and non-coval…	.	2100	2608	2235	1188	697	1944	1801	1386	1628	1134	2875	3010	3000	812	663	795	5945	6666	6076	0.192342	0.120515	0.282736	-1.33146	0.125284	5.05625e-24	0.811982	0.114933	1.40311e-10	0.123538	0.271051	0.785027
ENSG00000174607	UGT8	UDP glycosyltransferase 8	Catalysis of the reaction: UDP-D-galactose + a glucosylceramide = a lactosylceramide + uridine-5'-diphosphate. The glucosylceramide has sphinganine as the long chain base. [MetaCyc:RXN-10764, PMID:9593693];"Catalysis of the reaction: UDP-glucuronate + acceptor = UDP + acceptor beta-D-glucuronoside." [EC:2.4.1.17];"The chemical reactions and pathways involving glycosphingolipids, any compound with…	.	404	455	454	192	100	353	305	266	227	218	746	817	837	112	132	148	483	528	435	0.822047	0.132116	4.4001e-08	-1.33225	0.161774	1.58416e-14	-0.355649	0.130563	0.0395428	-0.0261571	0.284887	0.960173
ENSG00000186205	MARC1	mitochondrial amidoxime reducing component 1	The component of a membrane consisting of the gene products and protein complexes having at least some part of their peptide sequence embedded in the hydrophobic region of the membrane. [GOC:dos, GOC:go_curators];"Any process that reduces or removes the toxicity of nitrogenous compounds which are dangerous or toxic. This includes the aerobic conversion of toxic compounds to harmless substances." …	.	713	721	738	422	292	811	648	611	621	393	896	924	1046	253	249	316	905	886	862	0.0140276	0.166115	0.961267	-1.34296	0.174235	9.25259e-13	-0.543072	0.15574	0.00533571	-0.521556	0.203473	0.0600075
ENSG00000207442	SNORD116-6	.	.	.	133	147	133	54	43	97	142	151	152	86	63	59	74	49	48	51	145	136	173	-1.39648	0.227849	7.50961e-08	-1.36682	0.234407	1.77443e-07	-0.65311	0.213658	0.0176254	-1.0908	0.177157	1.25225e-07
ENSG00000170837	GPR27	G protein-coupled receptor 27	The component of a membrane consisting of the gene products and protein complexes having at least some part of their peptide sequence embedded in the hydrophobic region of the membrane. [GOC:dos, GOC:go_curators];"Any process that increases the frequency, rate or extent of the regulated release of insulin that contributes to the response of a cell to glucose." [GOC:bf, GOC:yaf];"A series of molec…	.	240	276	266	153	93	336	202	179	178	168	381	425	388	88	72	118	409	421	372	0.27384	0.19021	0.341419	-1.37477	0.217964	1.15996e-08	-0.162404	0.182734	0.573573	-0.272358	0.241147	0.443625
ENSG00000145335	SNCA	synuclein alpha	Any process that results in a change in state or activity of a cell or an organism (in terms of movement, secretion, enzyme production, gene expression, etc.) as a result of a magnesium ion stimulus. [GOC:mah];"Any process that stops, prevents, or reduces the frequency, rate or extent of the directed movement of norepinephrine into a cell." [GOC:ai];"A cellular component that forms a specialized …	negative regulation of exocytosis;negative regulation of cysteine-type endopeptidase activity involved in apoptotic process;canonical Wnt signaling pathway involved in negative regulation of apoptotic process;Young-onset Parkinson disease;DEMENTIA LEWY BODY;PARKINSON DISEASE 4 AUTOSOMAL DOMINANT;Hereditary late-onset Parkinson disease;negative regulation of chaperone-mediated autophagy;Parkinsoni…	887	906	797	340	191	681	1033	789	877	562	665	651	733	283	274	342	1326	1182	1242	-0.636821	0.178116	0.00451135	-1.37968	0.185079	5.80788e-12	-0.221928	0.175609	0.400216	-0.667588	0.184981	0.00510714
ENSG00000162174	ASRGL1	asparaginase like 1	Catalysis of the reaction: L-asparagine + H2O = L-aspartate + NH3. [EC:3.5.1.1];"The chemical reactions and pathways resulting in the breakdown of glutamate, via the intermediate L-aspartate." [GOC:mah];"A membrane-bounded organelle of eukaryotic cells in which chromosomes are housed and replicated. In most cells, the nucleus contains all of the cell's chromosomes except the organellar chromosome…	.	1484	1580	1395	695	366	1844	1497	1105	1199	823	1152	1201	1242	494	454	575	2213	1967	1914	-0.595279	0.135754	0.000287154	-1.39166	0.140853	8.58625e-21	-0.288738	0.132572	0.113361	-0.685411	0.168578	0.0012232
ENSG00000142875	PRKACB	protein kinase cAMP-activated catalytic subunit beta	Catalysis of the reaction: ATP + a protein = ADP + a phosphoprotein. This reaction requires the presence of cAMP. [EC:2.7.11.11];"That part of the nuclear content other than the chromosomes or the nucleolus." [GOC:ma, ISBN:0124325653];"Any process that results in a change in state or activity of a cell or an organism (in terms of movement, secretion, enzyme production, gene expression, etc.) as a…	.	800	1097	1033	198	151	431	591	461	510	354	1006	1002	993	206	243	210	1045	1082	938	0.307606	0.227299	0.37419	-1.39664	0.246803	4.55274e-07	-0.108363	0.23118	0.77007	-0.232032	0.255733	0.550306
ENSG00000228065	LINC01515	.	.	.	634	669	601	124	108	270	366	359	450	314	40	48	32	181	129	160	566	605	607	-3.70871	0.27325	3.44999e-38	-1.39803	0.249912	6.41075e-07	-0.383065	0.238143	0.265677	-1.21864	0.385735	0.0165992
ENSG00000154217	PITPNC1	phosphatidylinositol transfer protein, cytoplasmic 1	All of the contents of a cell excluding the plasma membrane and nucleus, but including other subcellular structures. [ISBN:0198547684];"Interacting selectively and non-covalently with any protein or protein complex (a complex of two or more proteins that may include other nonprotein molecules)." [GOC:go_curators];"Interacting selectively and non-covalently with a lipid." [GOC:ai];"That part of th…	DNA damage response signal transduction by p53 class mediator;phosphatidylinositol transporter activity	826	957	804	229	160	424	530	368	412	254	826	712	696	179	194	219	328	330	271	0.0495255	0.208615	0.889544	-1.40186	0.221279	9.74962e-09	-1.64845	0.212788	1.158e-12	-0.77185	0.273479	0.0357799
ENSG00000206052	DOK6	docking protein 6	Interacting selectively and non-covalently with the insulin receptor. [GOC:ai];"Interacting selectively and non-covalently with any protein or protein complex (a complex of two or more proteins that may include other nonprotein molecules)." [GOC:go_curators]	.	333	362	310	155	89	260	299	203	227	205	320	359	286	110	91	108	840	879	799	-0.216764	0.124609	0.235798	-1.41412	0.136375	6.92362e-23	0.713124	0.0966535	1.64179e-11	-0.0697141	0.271915	0.884968
ENSG00000116990	MYCL	v-myc avian myelocytomatosis viral oncogene lung carcinoma derived homolog	A membrane-bounded organelle of eukaryotic cells in which chromosomes are housed and replicated. In most cells, the nucleus contains all of the cell's chromosomes except the organellar chromosomes, and is the site of RNA synthesis and processing. In some species, or in specialized cell types, RNA metabolism or DNA replication may be absent. [GOC:go_curators];"Any molecular function by which a gen…	.	508	436	436	184	104	681	345	300	286	174	1465	1567	1720	150	111	158	457	454	441	1.59532	0.224444	1.93919e-10	-1.41884	0.240157	1.16592e-07	-0.627804	0.225548	0.0345489	0.417788	0.393208	0.474233
ENSG00000152208	GRID2	glutamate ionotropic receptor delta type subunit 2	The process in which a startle magnitude is reduced when the startling stimulus is preceded by a low-intensity prepulse. [GOC:dph, PMID:10341260];"A process that leads to a temporary increase in postsynaptic potential due to the flow of positively charged ions into the postsynaptic cell. The flow of ions that causes an EPSP is an excitatory postsynaptic current (EPSC) and makes it easier for the …	SPINOCEREBELLAR ATAXIA AUTOSOMAL RECESSIVE 18;Autosomal recessive congenital cerebellar ataxia due to GRID2 deficiency	549	636	552	140	110	349	322	243	295	182	506	544	547	137	137	122	623	563	500	0.120013	0.196471	0.702388	-1.42363	0.21615	2.07085e-09	-0.251601	0.19912	0.400313	-0.376115	0.232054	0.26203
ENSG00000141542	RAB40B	RAB40B, member RAS oncogene family	The membrane surrounding a cell that separates the cell from its external environment. It consists of a phospholipid bilayer and associated proteins. [ISBN:0716731363];"Cytoplasm situated near, or occurring around, the nucleus." [GOC:jid];"The process in which one or more ubiquitin groups are added to a protein." [GOC:ai];"The directed movement of a symbiont's proteins within a cell of the host o…	.	172	176	155	50	37	120	97	83	84	49	178	149	120	33	41	48	188	161	203	-0.0187451	0.211022	0.959635	-1.42491	0.239752	9.63926e-08	-0.16234	0.198738	0.6069	-0.398868	0.231056	0.228232
ENSG00000163412	EIF4E3	eukaryotic translation initiation factor 4E family member 3	The process preceding formation of the peptide bond between the first two amino acids of a protein. This includes the formation of a complex of the ribosome, mRNA, and an initiation complex that contains the first aminoacyl-tRNA. [ISBN:019879276X];"The part of the cytoplasm that does not contain organelles but which does contain other particulate matter, such as protein complexes." [GOC:hjd, GOC:…	.	731	907	851	352	195	655	391	311	356	273	883	840	863	192	194	217	878	990	962	0.188903	0.236941	0.62389	-1.43864	0.249147	2.42307e-07	-0.124907	0.238458	0.741105	-0.304153	0.251525	0.415476
ENSG00000100767	PAPLN	papilin, proteoglycan like sulfated glycoprotein	Stops, prevents or reduces the activity of serine-type endopeptidases, enzymes that catalyze the hydrolysis of nonterminal peptide bonds in a polypeptide chain; a serine residue (and a histidine residue) are at the active center of the enzyme. [GOC:ai];"The hydrolysis of proteins into smaller polypeptides and/or amino acids by cleavage of their peptide bonds." [GOC:bf, GOC:mah];"Any process that …	.	119	109	95	28	27	75	95	65	77	53	84	57	46	28	32	29	23	17	15	-0.821255	0.215877	0.00222542	-1.44474	0.220574	2.60886e-09	-3.00525	0.243944	4.56602e-32	-1.46424	0.29668	4.65681e-05
ENSG00000154645	CHODL	chondrolectin	The component of a membrane consisting of the gene products and protein complexes having at least some part of their peptide sequence embedded in the hydrophobic region of the membrane. [GOC:dos, GOC:go_curators];"All of the contents of a cell excluding the plasma membrane and nucleus, but including other subcellular structures." [ISBN:0198547684];"Any process that modulates the rate, frequency o…	.	86	72	87	38	33	67	66	49	55	47	147	186	185	24	23	27	306	331	308	0.881053	0.181439	4.22479e-05	-1.45168	0.239548	4.9529e-08	1.30656	0.147842	1.90293e-16	0.57915	0.339692	0.234788
ENSG00000189046	ALKBH2	alkB homolog 2, alpha-ketoglutarate dependent dioxygenase	Catalysis of the oxidative demethylation of N1-methyladenine and N3-methylcytosine in DNA, with concomitant decarboxylation of 2-oxoglutarate and releases oxidized methyl group on N1-methyladenine and N3-methylcytosine as formaldehyde. [IMG:00579, PMID:19786499];"The repair of alkylation damage, e.g. the removal of the alkyl group at the O6-position of guanine by O6-alkylguanine-DNA alkyltransfer…	.	767	789	710	435	230	898	666	543	538	361	773	833	854	255	213	270	1294	1358	1337	-0.162229	0.159812	0.52165	-1.4518	0.166672	3.38249e-16	0.0830446	0.151983	0.728336	-0.371128	0.222591	0.247073
ENSG00000272168	CASC15	.	.	.	776	893	852	182	151	438	391	321	422	310	577	628	636	186	166	190	825	741	683	-0.153258	0.222857	0.672026	-1.45806	0.233933	1.82483e-08	-0.317119	0.225391	0.343693	-0.53466	0.219728	0.0768503
ENSG00000272398	CD24	CD24 molecule	.	.	17113	19942	17184	6392	3709	15277	11136	7979	8890	5937	18282	17641	17399	3998	3904	5150	16806	16794	16022	0.0894981	0.176943	0.755613	-1.48648	0.186666	1.34587e-13	-0.460693	0.176547	0.050315	-0.477556	0.227697	0.134965
ENSG00000101695	RNF125	ring finger protein 125	The living contents of a cell; the matter contained within (but not including) the plasma membrane, usually taken to exclude large vacuoles and masses of secretory or ingested material. In eukaryotes it includes the nucleus and cytoplasm. [ISBN:0198506732];"Interacting selectively and non-covalently with a ubiquitin conjugating enzyme, any of the E2 proteins." [GOC:vp];"Catalysis of the joining o…	TENORIO SYNDROME	1211	1390	1276	462	315	1516	1048	856	1008	616	418	373	365	346	336	454	633	625	495	-1.89767	0.138502	7.86152e-39	-1.48942	0.146382	4.79938e-22	-1.75675	0.137035	9.13755e-35	-1.71299	0.103636	6.27028e-57
ENSG00000169744	LDB2	LIM domain binding 2	Any process by which an organism retains a population of somatic stem cells, undifferentiated cells in the embryo or adult which can undergo unlimited division and give rise to cell types of the body other than those of the germ-line. [GOC:bf, ISBN:0582227089];"Interacting selectively and non-covalently with any enzyme." [GOC:jl];"A tissue homeostatic process required for the maintenance of epith…	.	1150	1264	1258	487	256	912	873	791	791	507	1477	1611	1562	338	308	322	639	713	670	0.318442	0.102554	0.0167891	-1.49656	0.114534	3.27587e-36	-1.32944	0.105012	6.68551e-34	-0.564748	0.274248	0.143255
ENSG00000173258	ZNF483	zinc finger protein 483	A membrane-bounded organelle of eukaryotic cells in which chromosomes are housed and replicated. In most cells, the nucleus contains all of the cell's chromosomes except the organellar chromosomes, and is the site of RNA synthesis and processing. In some species, or in specialized cell types, RNA metabolism or DNA replication may be absent. [GOC:go_curators];"Interacting selectively and non-coval…	.	1029	1295	1309	370	248	1088	1094	817	1106	730	1665	1781	1656	334	348	358	1249	1296	1219	0.328013	0.1477	0.113741	-1.50712	0.159402	4.70467e-19	-0.556889	0.147388	0.00212219	-0.380694	0.249316	0.292324
ENSG00000109832	DDX25	DEAD-box helicase 25	The biological process whose specific outcome is the progression of a multicellular organism over time from an initial condition (e.g. a zygote or a young adult) to a later condition (e.g. a multicellular animal or an aged adult). [GOC:dph, GOC:ems, GOC:isa_complete, GOC:tb];"Any process that modulates the frequency, rate or extent of the chemical reactions and pathways resulting in the formation…	.	157	146	150	67	38	143	108	82	80	66	115	135	107	43	33	44	114	134	119	-0.394376	0.178032	0.114874	-1.51686	0.207872	1.8055e-11	-0.805767	0.166011	3.24214e-05	-0.825421	0.179556	0.000187707
ENSG00000168916	ZNF608	zinc finger protein 608	Interacting selectively and non-covalently with any metal ion. [GOC:ai]	.	2971	3239	2986	1171	761	2072	1869	1478	1663	893	4143	4190	4498	760	692	714	5452	5555	5492	0.572918	0.178955	0.0130983	-1.52847	0.185056	1.31288e-14	0.487831	0.176956	0.0366831	0.103077	0.28842	0.834169
ENSG00000185985	SLITRK2	SLIT and NTRK like family member 2	The component of a membrane consisting of the gene products and protein complexes having at least some part of their peptide sequence embedded in the hydrophobic region of the membrane. [GOC:dos, GOC:go_curators];"De novo generation of a long process of a neuron, that carries efferent (outgoing) action potentials from the cell body towards target cells. Refers to the morphogenesis or creation of …	.	278	312	335	113	71	348	166	149	163	125	126	111	146	71	79	78	67	63	71	-1.23989	0.224937	2.00431e-06	-1.54272	0.234792	2.29287e-09	-2.60434	0.231651	1.32371e-26	-1.68352	0.223205	2.7048e-11
ENSG00000151150	ANK3	.	.	Intellectual disability-hypotonia-spasticity-sleep disorder syndrome	2883	3421	3351	916	545	1862	2258	1863	2159	1530	4232	4417	4701	838	659	796	2918	3119	2794	0.54151	0.152219	0.00474246	-1.54756	0.158998	3.46223e-20	-0.499732	0.153287	0.0101999	-0.252129	0.275145	0.545845
ENSG00000178445	GLDC	glycine decarboxylase	The formation of a protein dimer, a macromolecular structure consists of two noncovalently associated identical or nonidentical subunits. [ISBN:0198506732];"A protein complex that catalyzes the reversible oxidation of glycine. In E. coli, it has four components: dihydrolipoamide dehydrogenase, glycine dehydrogenase (decarboxylating), lipoyl-GcvH-protein and aminomethyltransferase, also known as L…	GLDC-Related Glycine Encephalopathy;Infantile glycine encephalopathy;Neonatal glycine encephalopathy;GLYCINE ENCEPHALOPATHY;Atypical glycine encephalopathy	3642	3702	3440	1483	859	3452	3482	3404	3010	1972	4544	4998	5361	1019	1003	1141	3824	3819	3775	0.204388	0.128985	0.286934	-1.58042	0.128828	5.93303e-32	-0.627097	0.122044	8.85507e-06	-0.481419	0.239629	0.154906
ENSG00000137720	C11orf1	chromosome 11 open reading frame 1	A membrane-bounded organelle of eukaryotic cells in which chromosomes are housed and replicated. In most cells, the nucleus contains all of the cell's chromosomes except the organellar chromosomes, and is the site of RNA synthesis and processing. In some species, or in specialized cell types, RNA metabolism or DNA replication may be absent. [GOC:go_curators];"Elemental activities, such as catalys…	.	759	821	721	286	180	597	399	321	337	196	750	855	840	167	145	184	835	836	819	0.245558	0.231817	0.501247	-1.58618	0.243167	3.06448e-09	-0.171456	0.230234	0.638183	-0.312825	0.266274	0.429732
ENSG00000147251	DOCK11	dedicator of cytokinesis 11	The part of the cytoplasm that does not contain organelles but which does contain other particulate matter, such as protein complexes. [GOC:hjd, GOC:jl];"Interacting selectively and non-covalently with any protein or protein complex (a complex of two or more proteins that may include other nonprotein molecules)." [GOC:go_curators];"The sequential process in which the multiple coagulation factors …	.	1661	2000	1793	925	570	1721	2588	2025	2272	1707	3288	3268	3181	672	562	712	1262	1225	1196	0.259889	0.219242	0.44439	-1.59743	0.223964	5.6265e-11	-1.56635	0.219612	9.0765e-11	-0.66079	0.303562	0.118847
ENSG00000131914	LIN28A	lin-28 homolog A	Interacting selectively and non-covalently with a microRNA, a 21-23 nucleotide RNA that is processed from a stem-loop RNA precursor (pre-miRNA) that is encoded within plant and animal genomes. [PMID:15066283];"Any process that activates or increases the frequency, rate or extent of neuron differentiation." [GOC:go_curators];"The process by which an organism or tissue maintains a population of ste…	pre-miRNA processing;RNA 3'-end processing;regulation of stem cell population maintenance;miRNA catabolic process	45103	49087	45132	10574	6388	19550	35749	30979	29126	18821	60960	65748	66196	9694	8735	11518	34984	35911	35474	0.611251	0.2344	0.0541046	-1.59909	0.240768	1.46467e-09	-0.674904	0.23833	0.0307667	-0.260487	0.306992	0.58
ENSG00000183032	SLC25A21	solute carrier family 25 member 21	The component of a membrane consisting of the gene products and protein complexes having at least some part of their peptide sequence embedded in the hydrophobic region of the membrane. [GOC:dos, GOC:go_curators];"The process in which a solute is transported across a lipid bilayer, from one side of a membrane to the other" [GOC:dph, GOC:jid];"The inner, i.e. lumen-facing, lipid bilayer of the mit…	.	252	274	255	165	78	282	274	233	243	190	150	172	164	80	74	100	360	373	305	-1.10405	0.171187	1.22062e-08	-1.59958	0.185842	7.85167e-16	-0.47202	0.156349	0.0194695	-0.979837	0.180995	5.2571e-06
ENSG00000100473	COCH	cochlin	Interacting selectively and non-covalently with collagen, a group of fibrous proteins of very high tensile strength that form the main component of connective tissue in animals. Collagen is highly enriched in glycine (some regions are 33% glycine) and proline, occurring predominantly as 3-hydroxyproline (about 20%). [GOC:ai, ISBN:0198506732];"Any process that activates or increases the frequency,…	regulation of cell shape;DEAFNESS AUTOSOMAL DOMINANT 9;Autosomal dominant nonsyndromic sensorineural deafness type DFNA	291	331	287	136	108	367	190	171	163	130	429	471	515	79	79	80	132	137	121	0.482769	0.216182	0.111341	-1.60963	0.235452	4.13133e-10	-1.79369	0.220239	5.62388e-14	-0.549628	0.345347	0.271357
ENSG00000151276	MAGI1	membrane associated guanylate kinase, WW and PDZ domain containing 1	That part of the nuclear content other than the chromosomes or the nucleolus. [GOC:ma, ISBN:0124325653];"The attachment of a cell, either to another cell or to an underlying substrate such as the extracellular matrix, via cell adhesion molecules." [GOC:hb, GOC:pf];"An occluding cell-cell junction that is composed of a branching network of sealing strands that completely encircles the apical end o…	positive regulation of neuron death	1858	2225	2197	662	399	1290	1075	887	1179	686	1628	1585	1577	432	408	443	1734	1632	1616	-0.18983	0.182137	0.509062	-1.6338	0.191031	1.20959e-15	-0.581997	0.18368	0.0131062	-0.678387	0.216053	0.0174286
ENSG00000021826	CPS1	carbamoyl-phosphate synthase 1	The sequence of reactions by which arginine is synthesized from ornithine, then cleaved to yield urea and regenerate ornithine. The overall reaction equation is NH3 + CO2 + aspartate + 3 ATP + 2 H2O = urea + fumarate + 2 ADP + 2 phosphate + AMP + diphosphate. [GOC:pde, GOC:vw, ISBN:0198506732];"Any process that results in a change in state or activity of a cell (in terms of movement, secretion, e…	carbamoyl-phosphate synthase (ammonia) activity;CARBAMOYL PHOSPHATE SYNTHETASE 1 DEFICIENCY;nitric oxide metabolic process;triglyceride catabolic process;CARBAMOYL PHOSPHATE SYNTHETASE I DEFICIENCY HYPERAMMONEMIA DUE TO;carbamoyl phosphate biosynthetic process;PULMONARY HYPERTENSION NEONATAL SUSCEPTIBILITY TO;glycogen catabolic process;positive regulation of vasodilation	4503	5130	4795	1441	817	3411	3610	3107	2973	2140	6098	6427	6320	1125	927	1039	7149	7664	7311	0.423986	0.131457	0.0122942	-1.73268	0.137553	1.18939e-33	0.205299	0.133398	0.291612	-0.0999437	0.281613	0.835146
ENSG00000104327	CALB1	calbindin 1	The specific movement from place to place of an organism in response to external or internal stimuli. Locomotion of a whole organism in a manner dependent upon some combination of that organism's internal state and external conditions. [GOC:dph];"The living contents of a cell; the matter contained within (but not including) the plasma membrane, usually taken to exclude large vacuoles and masses o…	long-term memory;short-term memory;zinc ion binding;calcium ion binding	2014	2506	2269	1774	875	3415	2740	2140	2206	1544	669	755	546	636	715	849	1280	1165	967	-2.33572	0.227215	1.28714e-21	-1.75522	0.227359	8.4563e-13	-2.01756	0.21906	7.22585e-18	-2.03053	0.159402	1.6618e-33
ENSG00000196376	SLC35F1	solute carrier family 35 member F1	The component of a membrane consisting of the gene products and protein complexes having at least some part of their peptide sequence embedded in the hydrophobic region of the membrane. [GOC:dos, GOC:go_curators];"The directed movement of substances (such as macromolecules, small molecules, ions) or cellular components (such as complexes and organelles) into, out of or within a cell, or between c…	.	1662	1842	1842	532	316	1386	877	720	714	478	2424	2231	2399	323	311	319	816	867	838	0.637919	0.233221	0.0411306	-1.76185	0.243072	2.51427e-11	-1.26308	0.236943	3.51699e-06	-0.379647	0.343885	0.455314
ENSG00000214595	EML6	echinoderm microtubule associated protein like 6	All of the contents of a cell excluding the plasma membrane and nucleus, but including other subcellular structures. [ISBN:0198547684];"Any of the long, generally straight, hollow tubes of internal diameter 12-15 nm and external diameter 24 nm found in a wide variety of eukaryotic cells; each consists (usually) of 13 protofilaments of polymeric tubulin, staggered in such a manner that the tubulin…	.	427	451	464	154	109	265	317	249	283	178	601	713	692	99	74	108	164	128	124	0.616325	0.135158	0.000145105	-1.76761	0.1626	4.0845e-25	-2.08853	0.152451	9.67761e-40	-0.504722	0.374287	0.357767
ENSG00000108176	DNAJC12	DnaJ heat shock protein family (Hsp40) member C12	.	.	172	193	166	63	29	156	110	108	117	69	317	338	383	43	21	47	142	166	156	0.970091	0.154148	2.93451e-08	-1.78794	0.227505	2.98242e-13	-0.631312	0.157739	0.000991157	-0.0310663	0.3544	0.9616
ENSG00000197147	LRRC8B	leucine rich repeat containing 8 family member B	The component of a membrane consisting of the gene products and protein complexes having at least some part of their peptide sequence embedded in the hydrophobic region of the membrane. [GOC:dos, GOC:go_curators];"All of the contents of a cell excluding the plasma membrane and nucleus, but including other subcellular structures." [ISBN:0198547684];"A process in which an anion is transported from …	anion transmembrane transport	1672	1966	1873	743	384	1379	1198	1020	1020	712	2662	2617	2522	346	376	402	2194	2254	2117	0.536881	0.130265	0.000765555	-1.79828	0.146436	5.16739e-32	-0.15962	0.128429	0.409315	-0.182412	0.290825	0.695207
ENSG00000064989	CALCRL	calcitonin receptor like receptor	Combining with a calcitonin gene-related polypeptide (CGRP) to initiate a change in cell activity. [GOC:mah, PMID:12037140];"The directed movement of proteins into, out of or within a cell, or between cells, by means of some agent such as a transporter or pore." [GOC:ai];"Any process that stops, prevents, or reduces the frequency, rate or extent of the inflammatory response." [GOC:ai];"Combining …	.	1007	1225	1063	311	199	769	695	530	565	394	1050	1062	1083	192	184	242	874	899	931	0.113395	0.157821	0.656621	-1.80101	0.17619	3.02145e-22	-0.572622	0.160759	0.00423682	-0.540523	0.256667	0.133099
ENSG00000137672	TRPC6	transient receptor potential cation channel subfamily C member 6	Any process that activates or increases the frequency, rate or extent of neuron differentiation. [GOC:go_curators];"Enables the facilitated diffusion of a calcium ion (by an energy-independent process) involving passage through a transmembrane aqueous pore or channel without evidence for a carrier-mediated mechanism." [GOC:mtg_transport, GOC:pr, ISBN:0815340729];"A process in which a calcium ion …	Familial idiopathic steroid-resistant nephrotic syndrome with focal segmental hyalinosis;FOCAL SEGMENTAL GLOMERULOSCLEROSIS 2	236	260	238	48	40	182	185	148	148	106	125	133	112	33	46	63	418	406	413	-0.892593	0.19784	0.000176951	-1.81007	0.247121	1.47849e-11	0.377353	0.179293	0.128425	-0.467796	0.305032	0.290354
ENSG00000168505	GBX2	.	.	.	913	936	862	278	162	742	561	390	393	317	521	445	470	172	136	185	599	505	446	-0.744288	0.194776	0.00210408	-1.84075	0.205922	4.721e-17	-1.08733	0.198511	1.68172e-06	-1.15056	0.186583	1.1942e-07
ENSG00000112394	SLC16A10	solute carrier family 16 member 10	The component of a membrane consisting of the gene products and protein complexes having at least some part of their peptide sequence embedded in the hydrophobic region of the membrane. [GOC:dos, GOC:go_curators];"The directed movement of amino acids, organic acids containing one or more amino substituents, into, out of or within a cell, or between cells, by means of some agent such as a transpor…	.	608	585	535	213	146	564	496	359	477	280	567	559	597	126	122	144	514	508	502	-0.161222	0.101023	0.282737	-1.84878	0.12374	1.7643e-47	-0.789114	0.0964298	4.122e-14	-0.758599	0.224287	0.00959008
ENSG00000171310	CHST11	carbohydrate (chondroitin 4) sulfotransferase 11	The process, occurring in the embryo, by which the anatomical structures of the digit are generated and organized. A digit is one of the terminal divisions of an appendage, such as a finger or toe. [GOC:bf, GOC:jl, UBERON:0002544];"The chemical reactions and pathways resulting in the formation of chondroitin sulfate, any member of a group of 10-60 kDa glycosaminoglycans, widely distributed in car…	.	1040	1094	1024	348	201	796	687	680	554	399	918	931	982	213	184	212	1720	1753	1736	-0.0932263	0.139855	0.67907	-1.8588	0.152485	1.51357e-31	0.332364	0.137237	0.0730132	-0.270179	0.280139	0.52229
ENSG00000165029	ABCA1	ATP binding cassette subfamily A member 1	The external part of the cell wall and/or plasma membrane. [GOC:jl, GOC:mtg_sensu, GOC:sm];"The controlled release of a peptide from a cell or a tissue." [GOC:add];"The chemical reactions and pathways involving cholesterol, cholest-5-en-3 beta-ol, the principal sterol of vertebrates and the precursor of many steroids, including bile acids and steroid hormones. It is a component of the plasma memb…	phospholipid efflux;HYPERCHOLESTEROLEMIA FAMILIAL;TANGIER DISEASE;APOLIPOPROTEIN A-I DEFICIENCY;intracellular cholesterol transport;platelet dense granule organization;reverse cholesterol transport;positive regulation of cAMP biosynthetic process;regulation of Cdc42 protein signal transduction;cholesterol efflux;G-protein coupled receptor signaling pathway;phospholipid homeostasis;HYPOALPHALIPOPR…	4158	4658	4419	1880	1114	5300	2773	2386	2408	1666	1461	1597	1614	974	823	973	975	882	878	-1.54457	0.197226	1.26905e-12	-1.86324	0.19913	1.17948e-18	-2.76147	0.196617	8.18573e-42	-1.96178	0.198396	9.93382e-20
ENSG00000048052	HDAC9	histone deacetylase 9	That part of the nuclear content other than the chromosomes or the nucleolus. [GOC:ma, ISBN:0124325653];"The removal of an acetyl group from an acetylated lysine residue in a peptide or protein." [GOC:BHF, GOC:mah];"A protein complex that is capable of associating with DNA by direct binding, or via other DNA-binding proteins or complexes, and regulating transcription." [GOC:jl];"The modification …	PETERS ANOMALY;positive regulation of cell migration involved in sprouting angiogenesis	1376	1538	1530	564	319	1021	718	622	615	403	2379	2544	2551	271	258	234	768	766	631	0.929429	0.228933	0.00094436	-1.86501	0.24304	1.17909e-12	-1.2725	0.233141	1.84394e-06	-0.190005	0.380367	0.761907
ENSG00000124766	SOX4	SRY-box 4	Any process that activates or increases the frequency, rate or extent of cellular DNA-templated transcription. [GOC:go_curators, GOC:txnOH];"The developmental process pertaining to the initial formation of a cardiac ventricle from unspecified parts. A cardiac ventricle receives blood from a cardiac atrium and pumps it out of the heart." [GOC:mtg_heart];"That part of the nuclear content other than…	.	4783	5595	4865	1498	986	3830	3844	3409	3548	2139	4882	4929	5291	1028	960	1059	4354	4655	4023	-0.0101681	0.118777	0.960817	-1.86945	0.123153	5.17686e-49	-0.673836	0.119793	7.83236e-07	-0.649128	0.244073	0.04984
ENSG00000111846	GCNT2	glucosaminyl (N-acetyl) transferase 2, I-branching enzyme (I blood group)	The biological process whose specific outcome is the progression of a multicellular organism over time from an initial condition (e.g. a zygote or a young adult) to a later condition (e.g. a multicellular animal or an aged adult). [GOC:dph, GOC:ems, GOC:isa_complete, GOC:tb];"Any process that activates or increases the frequency, rate, or extent of heterotypic cell-cell adhesion." [GOC:add];"A se…	maintenance of lens transparency;N-acetyllactosaminide beta-16-N-acetylglucosaminyltransferase activity;CATARACT 13 WITH ADULT i PHENOTYPE;negative regulation of transforming growth factor beta receptor signaling pathway;positive regulation of ERK1 and ERK2 cascade;Total early-onset cataract;positive regulation of protein glycosylation;posttranscriptional regulation of gene expression;positive re…	2013	2296	2035	603	318	1453	1863	1618	1955	1324	1348	1286	1300	436	401	517	654	658	603	-0.783088	0.204825	0.00209175	-1.87257	0.213421	1.9924e-16	-2.25947	0.208771	1.09885e-24	-1.47637	0.237101	8.58101e-08
ENSG00000214796	AC098934.1	.	.	.	317	358	344	85	57	345	246	221	232	129	362	335	379	59	74	66	273	266	300	0.0794296	0.18685	0.796467	-1.876	0.221941	2.71991e-15	-0.720349	0.191227	0.00221275	-0.605767	0.269608	0.10583
ENSG00000254277	AC009446.1	.	.	.	296	371	283	154	100	393	340	272	313	194	229	299	194	84	68	96	257	228	200	-0.786429	0.179075	0.000281472	-1.88463	0.178168	8.20827e-24	-1.31615	0.156582	6.9741e-15	-1.25333	0.179019	8.64722e-10
ENSG00000079156	OSBPL6	oxysterol binding protein like 6	The membrane surrounding a cell that separates the cell from its external environment. It consists of a phospholipid bilayer and associated proteins. [ISBN:0716731363];"Interacting selectively and non-covalently with a lipid." [GOC:ai];"Either of the lipid bilayers that surround the nucleus and form the nuclear envelope; excludes the intermembrane space." [GOC:mah, GOC:pz];"The lipid bilayer surr…	.	359	455	461	113	89	241	235	181	210	141	662	696	694	72	66	75	206	246	175	0.895541	0.195481	0.000133555	-1.89112	0.224295	3.23774e-15	-1.24146	0.209945	1.66489e-07	-0.211098	0.373851	0.727882
ENSG00000155629	PIK3AP1	phosphoinositide-3-kinase adaptor protein 1	Interacting selectively and non-covalently with an identical protein or proteins. [GOC:jl];"Any series of molecular signals generated as a consequence of binding to toll-like receptor 9." [GOC:add, PMID:16551253, PMID:17328678];"Any process that activates or increases the frequency, rate or extent of signal transduction mediated by the phosphatidylinositol 3-kinase cascade." [GOC:ef];"Any series …	.	1678	1859	1734	555	334	1477	1119	801	803	553	318	295	297	236	352	326	885	761	736	-2.35354	0.193052	1.36624e-30	-1.90117	0.219121	4.4232e-16	-1.43823	0.191487	6.57459e-12	-1.84937	0.1756	1.70112e-22
ENSG00000167555	ZNF528	.	.	.	1370	1437	1326	453	284	887	687	567	691	477	855	860	819	240	209	253	280	317	262	-0.507859	0.185555	0.040989	-1.90753	0.196145	3.7244e-20	-2.50245	0.192051	6.31695e-36	-1.34826	0.285607	0.000115128
ENSG00000129682	FGF13	fibroblast growth factor 13	The space external to the outermost structure of a cell. For cells without external protective or external encapsulating structures this refers to space outside of the plasma membrane. This term covers the host cell environment outside an intracellular parasite. [GOC:go_curators];"Any of the long, generally straight, hollow tubes of internal diameter 12-15 nm and external diameter 24 nm found in …	.	1347	1518	1423	788	486	1209	1145	952	933	685	2496	2341	2382	297	298	358	1136	1095	1005	0.543986	0.146715	0.00303719	-1.91739	0.158944	6.51726e-31	-1.05402	0.141655	1.07428e-11	-0.428075	0.321997	0.364841
ENSG00000077092	RARB	retinoic acid receptor beta	That part of the nuclear content other than the chromosomes or the nucleolus. [GOC:ma, ISBN:0124325653];"Any process that activates or increases the rate or extent of cell proliferation." [GOC:go_curators];"The process whose specific outcome is the progression of the retina over time, from its formation to the mature structure. The retina is the innermost layer or coating at the back of the eyeba…	Matthew-Wood syndrome;embryonic digestive tract development;Microphthalmia and Diaphragmatic Hernia;Microphthalmia syndromic 12	736	845	800	487	226	1241	792	764	784	447	1481	1592	1714	241	185	204	656	692	712	0.529946	0.202594	0.053143	-1.92334	0.212444	1.74724e-17	-1.11396	0.201731	1.35152e-06	-0.443931	0.330684	0.359622
ENSG00000265992	ESRG	.	.	.	1427	1767	1821	360	250	1066	1219	985	1094	697	344	412	336	245	309	309	429	456	456	-2.04181	0.203215	1.06267e-20	-1.94027	0.215272	2.45969e-17	-2.20548	0.201727	3.3969e-25	-2.07678	0.130849	1.37407e-52
ENSG00000242715	CCDC169	coiled-coil domain containing 169	.	.	600	673	672	260	160	463	588	445	533	384	699	693	715	135	120	141	285	268	268	-0.049971	0.101154	0.762201	-2.01318	0.12502	3.84769e-55	-1.85576	0.107233	9.17743e-64	-0.972017	0.292894	0.0110665
ENSG00000175093	SPSB4	splA/ryanodine receptor domain and SOCS box containing 4	All of the contents of a cell excluding the plasma membrane and nucleus, but including other subcellular structures. [ISBN:0198547684];"Interacting selectively and non-covalently with any protein or protein complex (a complex of two or more proteins that may include other nonprotein molecules)." [GOC:go_curators];"The process in which a signal is passed on to downstream components within the cell…	.	997	1097	951	289	167	923	738	621	567	334	658	591	668	160	164	183	1993	1895	1726	-0.588051	0.182267	0.0122703	-2.04899	0.194697	1.43007e-23	0.496055	0.179379	0.0360625	-0.356639	0.316734	0.445064
ENSG00000124374	PAIP2B	poly(A) binding protein interacting protein 2B	All of the contents of a cell excluding the plasma membrane and nucleus, but including other subcellular structures. [ISBN:0198547684];"Antagonizes the ribosome-mediated translation of mRNA into a polypeptide via direct binding (through a selective and non-covalent interaction) to nucleic acid." [GOC:clt, GOC:vw];"Interacting selectively and non-covalently with any protein or protein complex (a c…	.	1042	1165	1062	397	243	1116	659	644	671	472	2840	3047	3149	218	168	197	755	767	682	1.42333	0.141486	9.84533e-21	-2.06754	0.157474	1.51378e-36	-1.04818	0.141572	1.37415e-11	0.173128	0.417492	0.806476
ENSG00000169499	PLEKHA2	pleckstrin homology domain containing A2	Interacting selectively and non-covalently with any protein or protein complex (a complex of two or more proteins that may include other nonprotein molecules). [GOC:go_curators];"Interacting selectively and non-covalently with a PDZ domain of a protein, a domain found in diverse signaling proteins." [GOC:go_curators, Pfam:PF00595];"Interacting selectively and non-covalently with phosphatidylinosi…	.	198	214	188	64	52	221	190	169	207	152	589	630	611	41	29	40	124	134	143	1.26319	0.169728	2.03696e-11	-2.30901	0.225307	2.34109e-22	-1.34899	0.185376	3.31843e-11	0.00795866	0.433321	0.992617
ENSG00000229191	AL358473.1	.	.	.	165	189	189	62	49	131	129	123	108	70	338	364	373	26	26	22	185	206	195	0.960803	0.134246	1.40519e-10	-2.41673	0.218303	4.74887e-26	-0.358502	0.136609	0.0489118	-0.0383962	0.379632	0.955906
ENSG00000165995	CACNB2	calcium voltage-gated channel auxiliary subunit beta 2	Enables the facilitated diffusion of a calcium ion (by an energy-independent process) involving passage through a transmembrane aqueous pore or channel without evidence for a carrier-mediated mechanism. [GOC:mtg_transport, GOC:pr, ISBN:0815340729];"A process in which a calcium ion is transported from one side of a membrane to the other by means of some agent such as a transporter or pore." [GOC:m…	regulation of heart rate by cardiac conduction;BRUGADA SYNDROME;membrane depolarization during atrial cardiac muscle cell action potential;voltage-gated calcium channel activity involved in cardiac muscle cell action potential;membrane depolarization during AV node cell action potential;BRUGADA SYNDROME 4;voltage-gated calcium channel activity involved in AV node cell action potential	269	280	284	67	48	161	197	196	172	124	310	336	283	34	40	27	54	50	49	0.224144	0.179627	0.418131	-2.47969	0.240744	1.39003e-22	-2.79194	0.209459	1.32533e-37	-0.915577	0.412595	0.11095
ENSG00000173267	SNCG	synuclein gamma	The array of microtubules and associated molecules that forms between opposite poles of a eukaryotic cell during mitosis or meiosis and serves to move the duplicated chromosomes apart. [ISBN:0198547684];"An intracellular structure that can catalyze gamma-tubulin-dependent microtubule nucleation and that can anchor microtubules by interacting with their minus ends, plus ends or sides." [GOC:vw, ht…	.	312	366	302	86	64	169	290	221	178	117	328	277	250	39	33	40	371	342	242	-0.113722	0.205542	0.732266	-2.56586	0.2412	4.56797e-24	-0.407962	0.211452	0.168948	-0.66761	0.318002	0.13458
ENSG00000198732	SMOC1	SPARC related modular calcium binding 1	Interacting selectively and non-covalently with calcium ions (Ca2+). [GOC:ai];"Interacting selectively and non-covalently with any protein or protein complex (a complex of two or more proteins that may include other nonprotein molecules)." [GOC:go_curators];"A thin layer of dense material found in various animal tissues interposed between the cells and the adjacent connective tissue. It consists …	limb development;compound eye development;MICROPHTHALMIA WITH LIMB ANOMALIES;positive regulation of osteoblast differentiation;ophthalmoacromelic syndrome (OAS)	875	893	870	524	335	1503	1235	963	1055	743	1196	1038	1204	106	96	135	954	851	907	-0.29553	0.225548	0.392054	-3.16152	0.241778	2.96763e-36	-1.07722	0.223514	3.7827e-05	-1.04899	0.346518	0.0228091
ENSG00000215252	GOLGA8B	.	.	.	494	493	419	106	73	375	346	234	337	263	408	435	438	41	26	40	781	863	762	-0.0975499	0.192113	0.754514	-3.19219	0.244608	3.9507e-36	0.352964	0.189979	0.188001	-0.338411	0.394061	0.574611
ENSG00000138823	MTTP	microsomal triglyceride transfer protein	Interacting selectively and non-covalently with an apolipoprotein, the protein component of a lipoprotein complex. [GOC:BHF, GOC:rl];"Enables the directed movement of lipids into, out of or within a cell, or between cells." [GOC:ai];"Interacting selectively and non-covalently with a lipid." [GOC:ai];"The portion of the plasma membrane surrounding a microvillus." [GOC:mah];"Any process that result…	MERRF;ABETALIPOPROTEINEMIA;ABDOMINAL OBESITY-METABOLIC SYNDROME 1	1231	1349	1133	395	226	800	973	826	668	448	558	603	680	87	79	77	27	54	31	-0.935052	0.159989	3.69283e-07	-3.39071	0.183356	6.24501e-73	-5.35869	0.223744	4.37494e-123	-1.97948	0.466836	0.000679707
ENSG00000138944	KIAA1644	KIAA1644	The component of a membrane consisting of the gene products and protein complexes having at least some part of their peptide sequence embedded in the hydrophobic region of the membrane. [GOC:dos, GOC:go_curators]	.	76	94	93	19	20	51	43	35	32	27	104	90	97	215	258	209	372	354	333	0.421002	0.267857	0.291638	2.07398	0.268108	7.50382e-13	1.81039	0.245321	1.62993e-11	1.56967	0.270864	8.55032e-07
ENSG00000145721	LIX1	limb and CNS expressed 1	All of the contents of a cell excluding the plasma membrane and nucleus, but including other subcellular structures. [ISBN:0198547684];"The process in which autophagosomes, double-membraned vacuoles containing cytoplasmic material fuse with a vacuole (yeast) or lysosome (e.g. mammals and insects). In the case of yeast, inner membrane-bounded structures (autophagic bodies) appear in the vacuole. F…	.	639	644	627	487	273	787	379	341	420	261	1536	1655	1742	2494	2190	2734	1849	1937	2057	1.02634	0.288034	0.00468307	2.03938	0.290934	1.29745e-10	0.837991	0.288456	0.025945	1.39575	0.243773	1.17456e-06
ENSG00000188153	COL4A5	collagen type IV alpha 5 chain	A thin sheet of proteoglycans and glycoproteins, especially laminin, secreted by cells as an extracellular matrix. [ISBN:0198547684];"The proteolytic chemical reactions and pathways resulting in the breakdown of collagen in the extracellular matrix, usually carried out by proteases secreted by nearby cells." [GOC:mah, ISBN:0815316194];"A thin layer of dense material found in various animal tissue…	ALPORT SYNDROME X-LINKED;X-linked Alport syndrome;X-linked diffuse leiomyomatosis - Alport syndrome	2420	2425	2240	694	429	2132	3117	2629	3037	1948	5850	6383	6912	10559	7594	9313	14426	15993	15641	0.989212	0.27661	0.00450228	1.93244	0.281223	3.30073e-10	1.79415	0.280045	9.64427e-09	1.63005	0.208419	3.90574e-12
ENSG00000197565	COL4A6	collagen type IV alpha 6 chain	The proteolytic chemical reactions and pathways resulting in the breakdown of collagen in the extracellular matrix, usually carried out by proteases secreted by nearby cells. [GOC:mah, ISBN:0815316194];"A thin layer of dense material found in various animal tissues interposed between the cells and the adjacent connective tissue. It consists of the basal lamina plus an associated layer of reticuli…	DEAFNESS X-LINKED 6;X-linked diffuse leiomyomatosis - Alport syndrome;X-linked nonsyndromic sensorineural deafness type DFN	337	382	324	119	88	378	510	463	584	321	810	866	959	1588	1371	1339	2854	3156	3107	0.692512	0.296899	0.0930651	1.82058	0.300078	4.77349e-08	2.00511	0.297923	1.27168e-09	1.60482	0.246322	1.5892e-08
ENSG00000090539	CHRD	chordin	Interacting selectively and non-covalently with syndecan, an integral membrane proteoglycan (250-300 kDa) associated largely with epithelial cells. [GOC:go_curators, PMID:9355727];"Any process that stops, prevents, or reduces the frequency, rate or extent of cell migration." [GOC:go_curators];"Any process that stops, prevents, or reduces the frequency, rate or extent of the BMP signaling pathway.…	BMP signaling pathway involved in spinal cord dorsal/ventral patterning;positive regulation of mesenchymal cell proliferation;negative regulation of BMP signaling pathway;negative regulation of osteoblast differentiation	68	82	64	20	22	91	121	84	89	69	353	299	301	327	249	278	520	454	391	1.4995	0.28609	7.34718e-06	1.78874	0.287628	1.97084e-08	1.5765	0.284898	1.27704e-06	1.64276	0.1686	3.61433e-19
ENSG00000158122	AAED1	AhpC/TSA antioxidant enzyme domain containing 1	A metabolic process that results in the removal or addition of one or more electrons to or from a substance, with or without the concomitant removal or addition of a proton or protons. [GOC:dhl, GOC:ecd, GOC:jh2, GOC:jid, GOC:mlg, GOC:rph];"Any process carried out at the cellular level that reduces or removes the toxicity superoxide radicals or hydrogen peroxide." [GOC:dos, GOC:vw];"Inhibition of…	.	103	106	101	107	46	206	138	114	139	84	300	302	321	499	411	525	427	498	447	0.709198	0.29198	0.0778232	1.76574	0.291156	4.83857e-08	0.835372	0.289405	0.0271444	1.17897	0.232368	2.53657e-05
ENSG00000173482	PTPRM	protein tyrosine phosphatase, receptor type M	.	.	287	287	259	109	101	207	375	372	407	234	720	706	841	1146	919	1097	2786	2761	2849	0.846029	0.272554	0.0168416	1.75307	0.272188	5.09807e-09	2.26283	0.268906	6.52199e-15	1.71835	0.239856	3.17571e-10
ENSG00000115525	ST3GAL5	ST3 beta-galactoside alpha-2,3-sialyltransferase 5	The component of a membrane consisting of the gene products and protein complexes having at least some part of their peptide sequence embedded in the hydrophobic region of the membrane. [GOC:dos, GOC:go_curators];"Catalysis of the reaction: CMP-N-acetylneuraminate + beta-D-galactosyl-1,4-N-acetyl-beta-D-glucosaminyl-1,3-beta-D-galactosyl-1,4-beta-D-glucosylceramide = CMP + alpha-N-acetylneuraminy…	AMISH INFANTILE EPILEPSY SYNDROME;Salt-and-pepper syndrome	169	190	174	81	40	137	270	238	269	169	346	324	364	730	518	695	854	923	869	0.353072	0.298189	0.444861	1.66622	0.300387	8.20332e-07	1.23774	0.296622	0.00052462	1.17825	0.243534	6.96361e-05
ENSG00000131724	IL13RA1	interleukin 13 receptor subunit alpha 1	Interacting selectively and non-covalently with any protein or protein complex (a complex of two or more proteins that may include other nonprotein molecules). [GOC:go_curators];"Combining with a cytokine and transmitting the signal from one side of the membrane to the other to initiate a change in cell activity." [GOC:add, GOC:mah];"The membrane surrounding a cell that separates the cell from it…	.	151	189	169	141	102	227	414	352	335	193	681	610	674	1009	740	927	1192	1373	1286	0.777301	0.351041	0.115064	1.63947	0.355931	7.15417e-05	1.29059	0.354495	0.00331442	1.29067	0.237873	4.93439e-06
ENSG00000123240	OPTN	optineurin	Interacting selectively and non-covalently with an identical protein or proteins. [GOC:jl];"That part of the nuclear content other than the chromosomes or the nucleolus." [GOC:ma, ISBN:0124325653];"A double-membrane-bounded compartment that engulfs endogenous cellular material as well as invading microorganisms to target them to the vacuole/lysosome for degradation as part of macroautophagy." [GO…	xenophagy;defense response to Gram-negative bacterium;GLAUCOMA PRIMARY OPEN ANGLE;negative regulation of receptor recycling;AMYOTROPHIC LATERAL SCLEROSIS 12;GLAUCOMA NORMAL TENSION SUSCEPTIBILITY TO;Amyotrophic lateral sclerosis;Golgi to plasma membrane protein transport;parkin-mediated mitophagy in response to mitochondrial depolarization;Golgi organization;protein targeting to Golgi	121	149	136	66	56	119	181	198	201	145	363	438	501	580	416	518	515	539	534	0.955156	0.286813	0.00918959	1.60323	0.284224	5.00393e-07	0.805299	0.2802	0.0278691	1.16619	0.205706	1.52745e-06
ENSG00000117151	CTBS	chitobiase	The chemical reactions and pathways resulting in the breakdown of oligosaccharides, molecules with between two and (about) 20 monosaccharide residues connected by glycosidic linkages. [ISBN:0198506732];"Interacting selectively and non-covalently with chitin, a linear polysaccharide consisting of beta-(1->4)-linked N-acetyl-D-glucosamine residues." [GOC:jl, ISBN:0198506732];"The chemical reactions…	.	58	67	50	63	45	75	93	79	95	73	253	218	229	287	203	257	239	335	288	0.928773	0.337032	0.0394015	1.45349	0.340785	0.000291031	0.79697	0.340567	0.0858389	1.10104	0.223659	4.90054e-05
ENSG00000134202	GSTM3	glutathione S-transferase mu 3	Interacting selectively and non-covalently with an identical protein or proteins. [GOC:jl];"The chemical reactions and pathways resulting in the breakdown of a xenobiotic compound, a compound foreign to living organisms. Used of chemical compounds, e.g. a xenobiotic chemical, such as a pesticide." [GOC:jl];"Any cellular process that reduces or removes the toxicity of nitrogenous compounds which a…	.	407	503	422	86	52	272	374	377	412	261	900	903	1008	951	856	972	2068	2143	2169	1.00107	0.278529	0.00430802	1.42475	0.282237	9.90454e-06	1.72342	0.281457	5.18156e-08	1.4198	0.188913	3.25338e-11
ENSG00000115738	ID2	inhibitor of DNA binding 2, HLH protein	The process in which a relatively unspecialized hemopoietic precursor cell acquires the specialized features of a leukocyte. A leukocyte is an achromatic cell of the myeloid or lymphoid lineages capable of ameboid movement, found in blood or other tissue. [CL:0000738, GOC:add, PMID:16551264];"Any process that activates or increases the frequency, rate or extent of cellular DNA-templated transcrip…	negative regulation of G1/S transition of mitotic cell cycle	1482	1637	1582	270	117	692	1397	1067	1129	755	3594	3779	3745	2876	2516	3172	8139	8312	7870	1.32071	0.329174	0.00112117	1.39571	0.337247	0.00047747	1.98872	0.337429	1.85505e-07	1.61784	0.220164	1.02482e-10
ENSG00000183255	PTTG1IP	pituitary tumor-transforming 1 interacting protein	The component of a membrane consisting of the gene products and protein complexes having at least some part of their peptide sequence embedded in the hydrophobic region of the membrane. [GOC:dos, GOC:go_curators];"Any process that activates or increases the frequency, rate or extent of the addition of ubiquitin groups to a protein." [GOC:mah];"The directed movement of a protein from the cytoplasm…	negative regulation of DNA damage response signal transduction by p53 class mediator;negative regulation of intrinsic apoptotic signaling pathway by p53 class mediator	2053	2278	1988	1344	684	3685	4461	3726	3747	2572	5637	5897	5925	8540	6599	9062	13498	13380	13140	0.466534	0.324746	0.342529	1.35032	0.331058	0.000599056	1.19442	0.329711	0.00350569	1.05862	0.227444	0.000151065
ENSG00000125266	EFNB2	ephrin B2	.	.	2063	2120	2011	492	352	1044	636	500	538	239	2828	2649	3014	2652	2484	2735	4515	4424	4181	0.950781	0.38457	0.0713144	1.28453	0.39505	0.00909197	1.13254	0.394997	0.028277	1.14904	0.24115	9.61078e-05
ENSG00000278730	AC005332.9	.	.	.	96	120	116	83	53	211	182	178	196	120	420	396	472	437	356	374	1046	1155	1028	0.946515	0.303461	0.0162193	1.24856	0.30617	0.000600493	1.80976	0.299136	7.8862e-08	1.38701	0.21259	1.5314e-08
ENSG00000119514	GALNT12	polypeptide N-acetylgalactosaminyltransferase 12	The component of a membrane consisting of the gene products and protein complexes having at least some part of their peptide sequence embedded in the hydrophobic region of the membrane. [GOC:dos, GOC:go_curators];"Interacting selectively and non-covalently with any metal ion." [GOC:ai];"Catalysis of the reaction: UDP-N-acetyl-D-galactosamine + polypeptide = UDP + N-acetyl-D-galactosaminyl-polypep…	COLORECTAL CANCER SUSCEPTIBILITY TO 1	126	97	127	104	74	240	230	196	182	127	666	635	699	477	374	466	745	764	744	1.37577	0.322268	0.000451563	1.23252	0.327486	0.0018236	1.1235	0.323301	0.00554625	1.26943	0.194247	1.43686e-08
ENSG00000005893	LAMP2	lysosomal associated membrane protein 2	A prelysosomal endocytic organelle differentiated from early endosomes by lower lumenal pH and different protein composition. Late endosomes are more spherical than early endosomes and are mostly juxtanuclear, being concentrated near the microtubule organizing center. [NIF_Subcellular:nlx_subcell_20090702, PMID:11964142, PMID:2557062];"A lipid bilayer along with all the proteins and protein compl…	regulation of protein stability;Glycogen storage disease due to LAMP-2 deficiency;Danon disease	1003	1230	1048	633	406	1502	1809	1484	1638	1267	4284	4325	4281	3758	2738	3525	4923	5276	4946	1.14224	0.265879	0.000408561	1.22158	0.270796	0.000107136	0.937584	0.267169	0.00498105	1.11473	0.162917	2.44197e-09
ENSG00000150687	PRSS23	protease, serine 23	A membrane-bounded organelle of eukaryotic cells in which chromosomes are housed and replicated. In most cells, the nucleus contains all of the cell's chromosomes except the organellar chromosomes, and is the site of RNA synthesis and processing. In some species, or in specialized cell types, RNA metabolism or DNA replication may be absent. [GOC:go_curators];"The hydrolysis of proteins into small…	.	1169	1300	1184	1015	558	2082	870	747	885	479	3261	3516	3513	2983	2326	3056	6182	6278	6121	1.00089	0.313121	0.013241	1.14478	0.320436	0.00344509	1.40389	0.316127	0.000188447	1.20463	0.196416	1.43244e-07
ENSG00000080561	MID2	midline 2	A process in which a protein is transported to, or maintained at, a microtubule. [GOC:bf, GOC:lb];"Catalysis of the joining of two substances, or two groups within a single molecule, with the concomitant hydrolysis of the diphosphate bond in ATP or a similar triphosphate." [EC:6, GOC:mah];"Innate immune responses are defense responses mediated by germline encoded components that directly recogniz…	protein localization to microtubule;microtubule binding;Mental retardation X-linked 101;positive regulation of autophagy;X-linked non-syndromic intellectual disability;positive regulation of NF-kappaB transcription factor activity;positive regulation of sequence-specific DNA binding transcription factor activity	11	29	18	11	4	8	27	21	16	13	74	74	55	42	36	40	81	80	87	1.40192	0.357775	0.00153081	1.09299	0.369363	0.0199391	1.27334	0.341857	0.00254397	1.29596	0.206539	6.52929e-08
ENSG00000186866	POFUT2	protein O-fucosyltransferase 2	The covalent attachment of a fucosyl group to an acceptor molecule. [CHEBI:62688, GOC:sart, PMID:19948734];"The process of transferring a fucosyl group to a serine or threonine residues in a protein acceptor molecule, to form an O-linked protein-sugar linkage." [GOC:sart, PMID:19948734];"Any process that modulates the frequency, rate or extent of the controlled release of a substance from a cell …	.	285	275	258	48	39	249	284	220	272	139	474	439	461	455	473	473	1049	1033	995	0.599881	0.267434	0.109707	1.07012	0.272631	0.00104487	1.30054	0.26719	3.04467e-05	1.02171	0.181671	1.88527e-06
ENSG00000184500	PROS1	protein S (alpha)	Interacting selectively and non-covalently with calcium ions (Ca2+). [GOC:ai];"The movement of a leukocyte within or between different tissues and organs of the body." [GOC:add, ISBN:0781735149, PMID:14680625, PMID:14708592, PMID:7507411, PMID:8600538];"The space external to the outermost structure of a cell. For cells without external protective or external encapsulating structures this refers t…	THROMBOPHILIA DUE TO PROTEIN S DEFICIENCY AUTOSOMAL RECESSIVE;THROMBOPHILIA DUE TO PROTEIN S DEFICIENCY AUTOSOMAL DOMINANT;Hereditary thrombophilia due to congenital protein S deficiency	470	570	591	452	271	721	969	724	827	592	1691	1692	1783	1747	1202	1646	3186	3717	3456	0.745475	0.277483	0.0457428	1.00958	0.283691	0.00360668	1.2939	0.278152	7.88881e-05	1.03894	0.181094	1.12137e-06
ENSG00000006282	SPATA20	spermatogenesis associated 20	Interacting selectively and non-covalently with any protein or protein complex (a complex of two or more proteins that may include other nonprotein molecules). [GOC:go_curators];"The biological process whose specific outcome is the progression of a multicellular organism over time from an initial condition (e.g. a zygote or a young adult) to a later condition (e.g. a multicellular animal or an ag…	.	134	108	122	50	20	165	210	165	176	101	412	323	358	273	255	315	558	562	522	0.916114	0.317753	0.0294289	0.991571	0.320673	0.0141387	1.05822	0.316089	0.00801264	1.0012	0.183329	4.1665e-06
ENSG00000092096	SLC22A17	solute carrier family 22 member 17	The process in which a solute is transported across a lipid bilayer, from one side of a membrane to the other [GOC:dph, GOC:jid];"The lipid bilayer surrounding the vacuole and separating its contents from the cytoplasm of the cell." [GOC:ai];"The directed movement of organic anions into, out of or within a cell, or between cells, by means of some agent such as a transporter or pore. Organic anion…	.	32	25	18	17	4	68	38	28	29	17	118	74	91	58	58	72	141	149	118	1.10575	0.388529	0.0322997	0.985775	0.391872	0.0562336	1.20009	0.375485	0.0122157	1.12437	0.224755	3.48909e-05
ENSG00000146556	WASH2P	.	.	.	43	37	42	15	7	32	17	19	20	19	44	25	35	60	50	46	202	215	158	-0.111231	0.300855	0.823688	0.891747	0.272914	0.00872596	1.86242	0.23083	1.01845e-13	1.0757	0.307221	0.00688574
ENSG00000266074	BAHCC1	.	.	.	161	180	197	46	29	100	114	74	88	86	97	62	66	165	295	174	350	322	249	-1.04556	0.241383	0.000357639	0.879455	0.268134	0.00842279	0.497965	0.211069	0.0828475	0.312085	0.290466	0.468548
ENSG00000128408	RIBC2	RIB43A domain with coiled-coils 2	.	.	24	26	20	6	10	14	24	14	18	16	43	39	31	43	33	32	119	118	71	0.496273	0.291506	0.24767	0.868655	0.290986	0.0186462	1.47049	0.268308	1.65719e-06	1.00263	0.233018	0.00054199
ENSG00000144366	GULP1	GULP, engulfment adaptor PTB domain containing 1	All of the contents of a cell excluding the plasma membrane and nucleus, but including other subcellular structures. [ISBN:0198547684];"Conveys a signal across a cell to trigger a change in cell function or state. A signal is a physical entity or change in state that is used to transfer information in order to trigger a response." [GOC:go_curators];"The internalization of bacteria, immune complex…	.	1047	1272	1184	778	519	1294	1792	1360	1789	1167	1773	1904	1844	2877	2165	2913	5487	5966	5103	-0.0929219	0.248034	0.821261	0.850709	0.251621	0.00626993	1.01891	0.246657	0.000615659	0.661488	0.20953	0.0166793
ENSG00000050165	DKK3	dickkopf WNT signaling pathway inhibitor 3	Any process that stops, prevents, or reduces the frequency, rate or extent of the chemical reactions and pathways resulting in the formation of aldosterone. [GOC:mah];"The process whose specific outcome is the progression of the adrenal gland over time, from its formation to the mature structure. This gland can either be a discrete structure located bilaterally above each kidney, or a cluster of …	.	293	357	313	187	100	531	195	170	185	132	1015	996	1077	547	440	516	1118	1101	1030	1.39698	0.27951	2.25782e-05	0.822457	0.285303	0.0241868	1.04019	0.27962	0.00258332	1.11654	0.183859	1.92875e-07
ENSG00000168575	SLC20A2	solute carrier family 20 member 2	Catalysis of the transfer of a solute or solutes from one side of a membrane to the other according to the reaction: Na+(out) + phosphate(out) = Na+(in) + phosphate(in). [GOC:ai];"Combining with an extracellular or intracellular messenger to initiate a change in cell activity." [GOC:ceb, ISBN:0198506732];"Enables the transfer of phosphate (PO4 3-) ions from one side of a membrane to the other, re…	Bilateral striopallidodentate calcinosis;BASAL GANGLIA CALCIFICATION IDIOPATHIC 1	1141	1301	1147	339	217	914	897	591	732	520	1083	965	1061	1527	1256	1602	5254	5190	5013	-0.137189	0.136097	0.525609	0.790464	0.137252	2.62836e-07	1.7147	0.131079	3.32667e-36	0.956422	0.24834	0.00243088
ENSG00000107798	LIPA	lipase A, lysosomal acid type	The appearance of a cytokine due to biosynthesis or secretion following a cellular stimulus, resulting in an increase in its intracellular or extracellular levels. [GOC:add, ISBN:0781735149];"The reorganization or renovation of existing tissues. This process can either change the characteristics of a tissue such as in blood vessel remodeling, or result in the dynamic equilibrium of a tissue such …	Lysosomal acid lipase deficiency;WOLMAN DISEASE;Cholesteryl ester storage disease	898	1162	953	557	318	1237	819	682	734	474	2126	2390	2373	1613	1318	1668	5028	5119	4711	0.911781	0.167755	2.92085e-06	0.769938	0.167671	7.60245e-05	1.56803	0.159568	2.30337e-20	1.1182	0.152688	1.16924e-10
ENSG00000136048	DRAM1	DNA damage regulated autophagy modulator 1	The component of a membrane consisting of the gene products and protein complexes having at least some part of their peptide sequence embedded in the hydrophobic region of the membrane. [GOC:dos, GOC:go_curators];"The lipid bilayer surrounding the lysosome and separating its contents from the cell cytoplasm." [GOC:ai];"All of the contents of a cell excluding the plasma membrane and nucleus, but i…	.	431	490	478	161	99	320	296	236	267	185	198	196	231	582	461	614	546	507	380	-1.07341	0.145746	3.44141e-11	0.754911	0.138035	1.24897e-06	-0.339731	0.146567	0.0894904	-0.024552	0.255504	0.958159
ENSG00000141431	ASXL3	additional sex combs like 3, transcriptional regulator	A membrane-bounded organelle of eukaryotic cells in which chromosomes are housed and replicated. In most cells, the nucleus contains all of the cell's chromosomes except the organellar chromosomes, and is the site of RNA synthesis and processing. In some species, or in specialized cell types, RNA metabolism or DNA replication may be absent. [GOC:go_curators];"Interacting selectively and non-coval…	Severe feeding difficulties-failure to thrive-microcephaly due to ASXL3 deficiency syndrome;BAINBRIDGE-ROPERS SYNDROME	604	790	867	158	105	308	434	341	403	308	361	346	402	671	866	770	2880	2800	2719	-0.723845	0.248546	0.0275685	0.753451	0.260762	0.0237753	1.69551	0.245752	4.23314e-10	0.853866	0.320217	0.0490928
ENSG00000162734	PEA15	phosphoprotein enriched in astrocytes 15	A cell cycle checkpoint that regulates progression through the cell cycle in response to DNA damage. A DNA damage checkpoint may blocks cell cycle progression (in G1, G2 or metaphase) or slow the rate at which S phase proceeds. [GOC:mtg_cell_cycle];"The directed movement of carbohydrate into, out of or within a cell, or between cells, by means of some agent such as a transporter or pore. Carbohyd…	.	1302	1304	1354	406	229	868	754	698	609	319	2306	2348	2557	1511	1258	1488	2094	1983	1987	1.06249	0.21358	2.4975e-05	0.749738	0.217265	0.00506185	0.375114	0.214916	0.220956	0.75608	0.158178	9.03832e-05
ENSG00000160310	PRMT2	protein arginine methyltransferase 2	Catalysis of the addition of a second methyl group to methylated peptidyl-arginine. Methylation is on the same terminal nitrogen (omega nitrogen) residue that was previously methylated, resulting in asymmetrical peptidyl-N(omega),N(omega)-dimethylated arginine residues. [PMID:14705965, RESID:AA0068, RESID:AA0069];"Any process that modulates the rate, frequency, or extent of the androgen receptor …	.	918	948	805	582	354	1553	957	748	829	597	1597	1597	1690	1753	1490	1647	4294	3939	4037	0.308832	0.219749	0.354185	0.747795	0.220368	0.00604638	1.17848	0.216035	1.86803e-06	0.783616	0.171626	0.000211811
ENSG00000167065	DUSP18	dual specificity phosphatase 18	That part of the nuclear content other than the chromosomes or the nucleolus. [GOC:ma, ISBN:0124325653];"The removal of phosphoric residues from peptidyl-O-phospho-L-threonine to form peptidyl-threonine." [GOC:bf];"Catalysis of the reactions: protein serine + H2O = protein serine + phosphate; protein threonine phosphate + H2O = protein threonine + phosphate; and protein tyrosine phosphate + H2O =…	.	52	23	29	18	16	27	31	44	28	24	121	101	101	59	58	57	193	201	209	1.16997	0.300372	0.00164825	0.746034	0.313698	0.0744976	1.62972	0.282557	3.69437e-07	1.23854	0.214843	9.88536e-07
ENSG00000268006	PTOV1-AS1	.	.	.	130	81	102	31	24	54	56	46	57	29	56	45	70	107	117	110	310	305	314	-0.645297	0.279453	0.0970056	0.732691	0.260568	0.0288999	1.30121	0.23806	1.77996e-06	0.652147	0.289456	0.104694
ENSG00000027697	IFNGR1	interferon gamma receptor 1	The irregular network of unit membranes, visible only by electron microscopy, that occurs in the cytoplasm of many eukaryotic cells. The membranes form a complex meshwork of tubular channels, which are often expanded into slitlike cavities called cisternae. The ER takes two forms, rough (or granular), with ribosomes adhering to the outer surface, and smooth (with no ribosomes attached). [ISBN:019…	Immunodeficiency 27b;IMMUNODEFICIENCY 27A;Mendelian susceptibility to mycobacterial diseases due to complete IFNgammaR1 deficiency;MYCOBACTERIUM TUBERCULOSIS SUSCEPTIBILITY TO MYCOBACTERIUM TUBERCULOSIS PROTECTION AGAINST INCLUDED;HEPATITIS B VIRUS SUSCEPTIBILITY TO;Autosomal dominant mendelian susceptibility to mycobacterial diseases due to partial IFNgammaR1 deficiency;Autosomal recessive mende…	1012	1098	985	437	223	903	1063	859	905	586	1515	1640	1733	1591	1280	1606	3865	4302	4129	0.416266	0.122338	0.00749797	0.725713	0.120326	5.82649e-08	1.29308	0.117221	1.21069e-25	0.851177	0.143771	4.40712e-07
ENSG00000180834	MAP6D1	MAP6 domain containing 1	The covalent attachment of a palmitoyl group to a nitrogen (N) atom in an N-terminal cysteine residue to form N-palmitoyl-L-cysteine. [RESID:AA0060];"Interacting selectively and non-covalently with microtubules, filaments composed of tubulin monomers." [GOC:krc];"Any process that stops, prevents, or reduces the frequency, rate or extent of microtubule depolymerization; prevention of depolymerizat…	.	110	118	130	48	33	161	113	87	72	62	198	249	268	184	146	189	502	445	455	0.74183	0.201503	0.00329159	0.720052	0.194614	0.00226397	1.26132	0.179407	1.75715e-10	0.932153	0.146159	3.5675e-08
ENSG00000151726	ACSL1	acyl-CoA synthetase long-chain family member 1	The chemical reactions and pathways resulting in the breakdown of a xenobiotic compound, a compound foreign to living organisms. Used of chemical compounds, e.g. a xenobiotic chemical, such as a pesticide. [GOC:jl];"The outer, i.e. cytoplasm-facing, lipid bilayer of the mitochondrial envelope." [GOC:ai];"Any process that results in a change in state or activity of a cell or an organism (in terms …	.	287	281	240	86	47	172	162	98	136	89	497	504	529	345	219	297	303	321	319	1.10913	0.198284	1.34392e-06	0.719233	0.215329	0.00707743	-0.0228782	0.201441	0.948466	0.671979	0.198725	0.00959589
ENSG00000106665	CLIP2	CAP-Gly domain containing linker protein 2	Any microtubule in the cytoplasm of a cell. [GOC:mah];"Interacting selectively and non-covalently with any protein or protein complex (a complex of two or more proteins that may include other nonprotein molecules)." [GOC:go_curators];"Interacting selectively and non-covalently with the plus end of a microtubule." [GOC:ai, PMID:14557818, PMID:14614826];"The growing (plus) end of a microtubule. In …	Williams syndrome	259	242	234	46	43	112	223	157	185	106	251	180	177	253	314	284	1185	996	816	-0.200643	0.256074	0.630954	0.718543	0.254792	0.0283177	1.6103	0.245212	3.57335e-09	0.878613	0.276795	0.0160096
ENSG00000118985	ELL2	elongation factor for RNA polymerase II 2	All of the contents of a cell excluding the plasma membrane and nucleus, but including other subcellular structures. [ISBN:0198547684];"The extension of an RNA molecule after transcription initiation and promoter clearance at an RNA polymerase II promoter by the addition of ribonucleotides catalyzed by RNA polymerase II." [GOC:mah, GOC:txnOH];"A structure comprised of a core structure (in most or…	snRNA transcription from RNA polymerase II promoter	191	252	246	141	92	256	315	300	308	184	770	771	758	454	451	413	377	379	364	1.05709	0.229663	0.00012283	0.71399	0.237222	0.0175575	-0.402206	0.23052	0.221227	0.570284	0.235698	0.0787731
ENSG00000070669	ASNS	asparagine synthetase (glutamine-hydrolyzing)	Any process that results in a change in state or activity of a cell or an organism (in terms of movement, secretion, enzyme production, gene expression, etc.) as a result of a light stimulus, electromagnetic radiation of wavelengths classified as infrared, visible or ultraviolet light. [GOC:go_curators, ISBN:0582227089];"The chemical reactions and pathways involving amino acids, carboxylic acids …	Asparagine synthetase deficiency;Congenital microcephaly-severe encephalopathy-progressive cerebral atrophy syndrome;canonical Wnt signaling pathway involved in negative regulation of apoptotic process	2226	2313	2192	1040	549	2715	2552	2552	2235	1692	8153	8265	7497	4131	3001	3864	3407	3561	3563	1.35715	0.187662	8.48582e-11	0.683016	0.191207	0.00344949	-0.254631	0.186862	0.36099	0.729549	0.234405	0.0186463
ENSG00000178104	PDE4DIP	phosphodiesterase 4D interacting protein;phosphodiesterase 4D interacting protein-like	A structure comprised of a core structure (in most organisms, a pair of centrioles) and peripheral material from which a microtubule-based structure, such as a spindle apparatus, is organized. Centrosomes occur close to the nucleus during interphase in many eukaryotic cells, though in animal cells it changes continually during the cell-division cycle. [GOC:mah, ISBN:0198547684];"Interacting selec…	.	741	768	811	246	169	564	481	412	467	341	978	930	1049	953	800	895	2311	2487	2521	0.401226	0.12127	0.00979672	0.681065	0.122763	8.17205e-07	1.25522	0.118556	1.26199e-23	0.817558	0.142629	1.14967e-06
ENSG00000101935	AMMECR1	Alport syndrome, mental retardation, midface hypoplasia and elliptocytosis chromosomal region gene 1	Elemental activities, such as catalysis or binding, describing the actions of a gene product at the molecular level. A given gene product may exhibit one or more molecular functions. [GOC:go_curators];"The part of a cell or its extracellular environment in which a gene product is located. A gene product may be located in one or more parts of a cell and its location may be as specific as a particu…	Alport syndrome-intellectual disability-midface hypoplasia-elliptocytosis syndrome	671	795	796	306	184	410	565	472	547	333	1541	1724	1640	906	819	1004	952	939	926	1.07792	0.138681	1.98217e-12	0.675216	0.142509	4.03948e-05	-0.164741	0.135977	0.422832	0.60685	0.188046	0.0140204
ENSG00000075223	SEMA3C	semaphorin 3C	Interacting selectively and non-covalently with a member of the neuropilin family. [GOC:bf, PMID:23871893];"Interacting selectively and non-covalently with semaphorin receptors." [GOC:ceb, PMID:12001990];"Any process that stops, prevents, or reduces the frequency, rate or extent of axon extension involved in axon guidance." [GOC:devbiol];"The process whose specific outcome is the progression of t…	Hirschsprung disease	691	852	756	360	231	849	1001	702	919	580	643	759	737	1236	1166	1384	18318	18315	17450	-0.577988	0.182717	0.0144082	0.673068	0.17928	0.00187966	3.59225	0.172083	2.67284e-93	2.01592	0.465445	0.000486891
ENSG00000136213	CHST12	uncharacterized LOC101927181;carbohydrate (chondroitin 4) sulfotransferase 12	The chemical reactions and pathways resulting in the formation of chondroitin sulfate, any member of a group of 10-60 kDa glycosaminoglycans, widely distributed in cartilage and other mammalian connective tissues, the repeat units of which consist of beta-(1,4)-linked D-glucuronyl beta-(1,3)-N-acetyl-D-galactosamine sulfate. [GOC:mah, ISBN:0198506732];"The chemical reactions and pathways resultin…	.	159	207	193	91	60	156	193	90	133	120	97	91	96	255	232	274	212	228	131	-1.17724	0.18814	3.61152e-08	0.663325	0.172185	0.0013504	-0.639836	0.200078	0.0121649	-0.181924	0.274876	0.67585
ENSG00000154864	PIEZO2	piezo type mechanosensitive ion channel component 2	The component of a membrane consisting of the gene products and protein complexes having at least some part of their peptide sequence embedded in the hydrophobic region of the membrane. [GOC:dos, GOC:go_curators];"A process in which an ion is transported from one side of a membrane to the other by means of some agent such as a transporter or pore." [GOC:mah];"The directed movement of cations, ato…	Arthrogryposis distal type 3;Gordon syndrome;ARTHROGRYPOSIS DISTAL TYPE 5D;Marden-Walker syndrome;Arthrogryposis with oculomotor limitation and electroretinal anomalies	96	91	104	96	73	176	164	114	153	136	318	306	357	228	247	243	861	827	838	0.654412	0.332432	0.172144	0.661686	0.339272	0.161194	1.55166	0.328001	5.63141e-05	1.02421	0.240814	0.000651777
ENSG00000172345	STARD5	StAR related lipid transfer domain containing 5	The chemical reactions and pathways resulting in the formation of C21-steroid hormones, steroid compounds containing 21 carbons which function as hormones. [GOC:ai];"Interacting selectively and non-covalently with bile acids, any of a group of steroid carboxylic acids occurring in bile." [GOC:rph];"The part of the cytoplasm that does not contain organelles but which does contain other particulate…	.	40	39	45	21	14	63	63	81	77	58	225	210	264	85	94	100	242	293	261	1.48012	0.350876	0.000541316	0.653864	0.366266	0.206847	1.24689	0.352207	0.00453273	1.18875	0.238781	3.85999e-05
ENSG00000132879	FBXO44	F-box protein 44	Interacting selectively and non-covalently with any protein or protein complex (a complex of two or more proteins that may include other nonprotein molecules). [GOC:go_curators];"A ubiquitin ligase complex in which a cullin from the Cul1 subfamily and a RING domain protein form the catalytic core; substrate specificity is conferred by a Skp1 adaptor and an F-box protein. SCF complexes are involve…	.	158	168	149	61	19	199	178	152	165	120	287	250	262	257	193	266	608	626	549	0.376942	0.25398	0.324226	0.650476	0.258379	0.0559913	1.07174	0.247272	0.00028491	0.730161	0.175071	0.000867936
ENSG00000186777	ZNF732	zinc finger protein 732	A membrane-bounded organelle of eukaryotic cells in which chromosomes are housed and replicated. In most cells, the nucleus contains all of the cell's chromosomes except the organellar chromosomes, and is the site of RNA synthesis and processing. In some species, or in specialized cell types, RNA metabolism or DNA replication may be absent. [GOC:go_curators];"Interacting selectively and non-coval…	.	324	293	284	98	54	220	315	246	340	199	139	143	121	445	356	441	146	141	152	-1.37444	0.221448	4.76844e-08	0.650299	0.211587	0.0148604	-1.70521	0.219261	9.26968e-13	-0.385437	0.345556	0.450006
ENSG00000177548	RABEP2	rabaptin, RAB GTPase binding effector protein 2	All of the contents of a cell excluding the plasma membrane and nucleus, but including other subcellular structures. [ISBN:0198547684];"A vesicle-mediated transport process in which cells take up external materials or membrane constituents by the invagination of a small region of the plasma membrane to form a new membrane-bounded vesicle." [GOC:mah, ISBN:0198506732, ISBN:0716731363];"The directed…	.	216	207	196	57	43	184	166	83	115	107	108	70	63	206	203	298	589	486	427	-1.31048	0.227587	5.80625e-07	0.643123	0.201161	0.0106047	0.836643	0.184422	0.000127291	0.313936	0.301671	0.485245
ENSG00000181404	WASH1	WAS protein family homolog 1	A prelysosomal endocytic organelle differentiated from early endosomes by lower lumenal pH and different protein composition. Late endosomes are more spherical than early endosomes and are mostly juxtanuclear, being concentrated near the microtubule organizing center. [NIF_Subcellular:nlx_subcell_20090702, PMID:11964142, PMID:2557062];"A protein complex that localizes at the surface of endosomes,…	positive regulation of cell migration;retrograde transport endosome to Golgi;positive regulation of pseudopodium assembly;retrograde transport endosome to plasma membrane;regulated exocytosis;extracellular matrix disassembly	75	70	44	25	22	49	39	26	26	29	64	73	53	75	68	72	290	280	264	0.0299585	0.275043	0.950161	0.63971	0.264568	0.0691605	1.6894	0.230582	2.35189e-11	0.922947	0.274683	0.0100514
ENSG00000235257	ITGA9-AS1	.	.	.	57	52	50	25	25	57	46	48	49	27	64	55	49	81	72	81	268	246	253	-0.270504	0.223854	0.434113	0.638709	0.204569	0.0130472	1.45912	0.169673	1.40666e-15	0.731576	0.259326	0.0358569
ENSG00000122863	CHST3	carbohydrate sulfotransferase 3	The component of a membrane consisting of the gene products and protein complexes having at least some part of their peptide sequence embedded in the hydrophobic region of the membrane. [GOC:dos, GOC:go_curators];"The chemical reactions and pathways resulting in the formation of chondroitin sulfate, any member of a group of 10-60 kDa glycosaminoglycans, widely distributed in cartilage and other m…	MULTIPLE JOINT DISLOCATIONS SHORT STATURE AND CRANIOFACIAL DYSMORPHISMWITH OR WITHOUT CONGENITAL HEART DEFECTS;positive regulation of defense response to virus by host;CHST3-related skeletal dysplasia;SPONDYLOEPIPHYSEAL DYSPLASIA WITH CONGENITAL JOINT DISLOCATIONS	692	664	664	154	81	409	509	361	441	258	702	702	769	727	620	734	3158	3046	2870	0.257765	0.21248	0.432507	0.630355	0.215452	0.0217488	1.8469	0.211309	4.18147e-16	1.06257	0.253014	0.000780917
ENSG00000214530	STARD10	StAR related lipid transfer domain containing 10	An extremely narrow tubular channel located between adjacent cells. An instance of this is the secretory canaliculi occurring between adjacent parietal cells in the gastric mucosa of vertebrates. [ISBN:0721662544];"The part of the cytoplasm that does not contain organelles but which does contain other particulate matter, such as protein complexes." [GOC:hjd, GOC:jl];"Interacting selectively and n…	.	61	54	66	26	24	72	99	71	77	43	105	89	123	101	102	112	503	448	389	0.194937	0.26556	0.652496	0.624279	0.258899	0.0700173	1.7969	0.239647	7.14613e-12	1.0175	0.269614	0.0030585
ENSG00000131941	RHPN2	rhophilin Rho GTPase binding protein 2	All of the contents of a cell excluding the plasma membrane and nucleus, but including other subcellular structures. [ISBN:0198547684];"The part of the cytoplasm that does not contain organelles but which does contain other particulate matter, such as protein complexes." [GOC:hjd, GOC:jl];"That part of the nuclear content other than the chromosomes or the nucleolus." [GOC:ma, ISBN:0124325653];"Th…	.	352	334	298	131	80	483	332	295	289	199	1035	1078	1069	507	422	492	1358	1325	1224	1.31451	0.185004	1.95192e-10	0.602946	0.188271	0.0104284	1.16487	0.181771	9.55872e-09	1.05917	0.147266	2.74718e-10
ENSG00000125246	CLYBL	citrate lyase beta like	A semiautonomous, self replicating organelle that occurs in varying numbers, shapes, and sizes in the cytoplasm of virtually all eukaryotic cells. It is notably the site of tissue respiration. [GOC:giardia, ISBN:0198506732];"Catalysis of the reaction: acetyl-CoA + glyoxylate + H(2)O = (S)-malate + CoA + H(+)." [EC:2.3.3.9, RHEA:18184];"Interacting selectively and non-covalently with magnesium (Mg…	.	348	311	280	130	73	451	175	158	139	95	662	684	713	318	360	404	1144	1223	1127	1.06439	0.28313	0.00256312	0.602442	0.293562	0.136712	1.37834	0.282889	2.97665e-05	1.05544	0.197836	7.4667e-06
ENSG00000085063	CD59	CD59 molecule	Any process that stops, prevents, or reduces the frequency, rate or extent of the activation of the membrane attack complex components of the complement cascade. [GOC:hjd];"The external part of the cell wall and/or plasma membrane." [GOC:jl, GOC:mtg_sensu, GOC:sm];"The addition of COPII proteins and adaptor proteins to ER membranes during the formation of transport vesicles, forming a vesicle coa…	HEMOLYTIC ANEMIA CD59-MEDIATED WITH OR WITHOUT IMMUNE-MEDIATED POLYNEUROPATHY;Primary CD59 deficiency	929	907	884	549	284	1422	1143	963	996	717	1150	1366	1355	1614	1270	1753	5204	5438	5451	-0.0845867	0.208369	0.80584	0.601681	0.208002	0.023589	1.50202	0.201688	1.03295e-11	0.802363	0.237903	0.0098138
ENSG00000144040	SFXN5	sideroflexin 5	The directed movement of citrate, 2-hydroxy-1,2,3-propanetricarboyxlate, into, out of or within a cell, or between cells, by means of some agent such as a transporter or pore. [GOC:krc];"A semiautonomous, self replicating organelle that occurs in varying numbers, shapes, and sizes in the cytoplasm of virtually all eukaryotic cells. It is notably the site of tissue respiration." [GOC:giardia, ISBN…	.	311	304	287	177	96	360	335	272	297	210	351	354	335	478	457	446	1500	1383	1350	-0.250024	0.159789	0.294232	0.598029	0.160039	0.00200082	1.31356	0.146941	8.07768e-17	0.669476	0.222348	0.0236795
ENSG00000094975	SUCO	SUN domain containing ossification factor	The component of a membrane consisting of the gene products and protein complexes having at least some part of their peptide sequence embedded in the hydrophobic region of the membrane. [GOC:dos, GOC:go_curators];"Any process that activates or increases the frequency, rate or extent of osteoblast differentiation." [GOC:go_curators];"The lipid bilayer surrounding the rough endoplasmic reticulum." …	.	3785	4449	4065	1642	980	2869	3166	2409	2935	2231	4339	4464	4350	5197	3992	5355	13340	15117	13763	0.0188411	0.0818436	0.893388	0.59658	0.0924385	4.69174e-09	1.24716	0.0826265	2.3392e-48	0.692836	0.174922	0.00171924
ENSG00000116741	RGS2	regulator of G-protein signaling 2	The process in which a relatively unspecialized cell acquires specialized features of a brown adipocyte, an animal connective tissue cell involved in adaptive thermogenesis. Brown adipocytes contain multiple small droplets of triglycerides and a high number of mitochondria. [PMID:12588810];"Any process that decreases the rate, frequency or extent of the enlargement or overgrowth of all or part of…	positive regulation of G-protein coupled receptor protein signaling pathway;GTPase activator activity	1497	1659	1426	508	271	1036	855	797	866	604	974	1084	1036	1636	1317	1731	771	805	713	-0.43698	0.147561	0.0243507	0.588862	0.150936	0.00113784	-1.32086	0.14746	6.91853e-17	-0.178517	0.259419	0.662261
ENSG00000145569	FAM105A	family with sequence similarity 105 member A	.	.	128	149	140	46	34	77	166	110	148	112	185	186	225	178	174	211	684	746	787	0.224929	0.243721	0.563605	0.579175	0.24409	0.07531	1.64977	0.231922	1.01699e-10	0.938616	0.245969	0.00268505
ENSG00000275131	AC241952.1	.	.	.	109	94	108	33	25	57	75	89	78	32	168	222	201	124	122	101	497	521	460	0.889321	0.223736	0.00126292	0.57831	0.234999	0.0631188	1.75416	0.200219	3.52591e-16	1.15618	0.217673	8.39716e-06
ENSG00000269556	TMEM185A	transmembrane protein 185A	The component of a membrane consisting of the gene products and protein complexes having at least some part of their peptide sequence embedded in the hydrophobic region of the membrane. [GOC:dos, GOC:go_curators];"Interacting selectively and non-covalently with any protein or protein complex (a complex of two or more proteins that may include other nonprotein molecules)." [GOC:go_curators];"A neu…	FRAXF syndrome	198	227	161	40	27	193	169	143	141	97	404	352	454	237	216	215	556	583	566	0.976001	0.226481	0.000389736	0.574472	0.228353	0.0562282	1.02351	0.217219	6.12483e-05	0.87375	0.144855	2.41521e-07
ENSG00000135845	PIGC	phosphatidylinositol glycan anchor biosynthesis class C	The component of a membrane consisting of the gene products and protein complexes having at least some part of their peptide sequence embedded in the hydrophobic region of the membrane. [GOC:dos, GOC:go_curators];"The stepwise addition of the components of the GPI anchor on to phosphatidylinositol lipids in the endoplasmic reticulum membrane." [ISBN:0879695595];"An enzyme complex that catalyzes t…	.	733	860	692	386	229	791	647	563	616	378	900	1014	1064	1033	826	1133	2556	2815	2558	0.129187	0.119596	0.491298	0.569304	0.118838	3.21493e-05	1.08824	0.104465	7.32328e-23	0.636377	0.15065	0.000717144
ENSG00000132613	MTSS1L	.	.	.	301	300	324	82	53	208	206	104	130	92	187	131	146	259	310	274	944	777	702	-0.72772	0.247678	0.0258145	0.558131	0.2454	0.0910571	1.16491	0.233936	1.8236e-05	0.516047	0.276866	0.190204
ENSG00000122386	ZNF205	zinc finger protein 205	The cellular synthesis of RNA on a template of DNA. [GOC:jl, GOC:txnOH];"Interacting selectively and non-covalently with DNA of a specific nucleotide composition, e.g. GC-rich DNA binding, or with a specific sequence motif or type of DNA e.g. promotor binding or rDNA binding." [GOC:jl];"Any process that activates or increases the frequency, rate or extent of mitochondrial outer membrane permeabil…	positive regulation of mitochondrial outer membrane permeabilization involved in apoptotic signaling pathway;positive regulation of hydrogen peroxide biosynthetic process;negative regulation of transcription from RNA polymerase II promoter in response to UV-induced DNA damage	245	273	234	93	58	366	315	166	196	162	202	129	108	352	270	396	644	549	446	-1.07838	0.249412	0.000368691	0.533276	0.216377	0.0626816	0.334179	0.215603	0.287169	0.0817375	0.257302	0.854159
ENSG00000048162	NOP16	NOP16 nucleolar protein	A membrane-bounded organelle of eukaryotic cells in which chromosomes are housed and replicated. In most cells, the nucleus contains all of the cell's chromosomes except the organellar chromosomes, and is the site of RNA synthesis and processing. In some species, or in specialized cell types, RNA metabolism or DNA replication may be absent. [GOC:go_curators];"A small, dense body one or more of wh…	.	693	828	746	304	206	886	972	785	800	535	468	475	426	1140	996	1163	1015	988	954	-1.15669	0.187933	6.42915e-08	0.531174	0.183577	0.0235351	-0.508768	0.182007	0.0336159	-0.207144	0.24602	0.583325
ENSG00000196576	PLXNB2	plexin B2	The external part of the cell wall and/or plasma membrane. [GOC:jl, GOC:mtg_sensu, GOC:sm];"Combining with a semaphorin, and transmitting the signal from one side of the membrane to the other to initiate a change in cell activity." [GOC:mah, GOC:signaling, PMID:15239958];"Any process that modulates the frequency, rate or extent of addition of phosphate groups into an amino acid in a protein." [GO…	.	1060	1053	941	245	180	1108	1225	757	861	569	1155	731	687	1228	1241	1219	4529	3960	3342	-0.430327	0.248039	0.237099	0.518202	0.227249	0.0900678	1.28531	0.228373	7.7201e-07	0.60814	0.259386	0.0903449
ENSG00000170525	PFKFB3	6-phosphofructo-2-kinase/fructose-2,6-biphosphatase 3	That part of the nuclear content other than the chromosomes or the nucleolus. [GOC:ma, ISBN:0124325653];"The chemical reactions and pathways involving fructose 2,6-bisphosphate. The D enantiomer is an important regulator of the glycolytic and gluconeogenic pathways. It inhibits fructose 1,6-bisphosphatase and activates phosphofructokinase." [ISBN:0198506732];"The chemical reactions and pathways i…	.	798	788	798	201	129	507	493	425	541	348	857	943	694	797	695	822	2383	2368	2198	0.180628	0.174542	0.512343	0.509035	0.166229	0.0152958	1.19795	0.160875	1.03447e-11	0.688114	0.175187	0.0019059
ENSG00000172426	RSPH9	radial spoke head 9 homolog	All of the contents of a cell excluding the plasma membrane and nucleus, but including other subcellular structures. [ISBN:0198547684];"The bundle of microtubules and associated proteins that forms the core of cilia (also called flagella) in eukaryotic cells and is responsible for their movements." [GOC:bf, GOC:cilia, ISBN:0198547684];"Interacting selectively and non-covalently with any protein o…	cilium movement;axoneme assembly;Primary ciliary dyskinesia;CILIARY DYSKINESIA PRIMARY 12	20	22	24	16	9	20	10	14	10	7	46	53	47	19	24	33	78	99	88	0.987986	0.331663	0.0232569	0.506566	0.376616	0.365661	1.40768	0.304912	9.14316e-05	1.03395	0.239427	0.000510981
ENSG00000006756	ARSD	arylsulfatase D	Interacting selectively and non-covalently with any metal ion. [GOC:ai];"The process of covalently altering one or more amino acids in a protein after the protein has been completely translated and released from the ribosome." [GOC:jsg];"The volume enclosed by the membranes of the endoplasmic reticulum." [ISBN:0198547684];"The chemical reactions and pathways involving glycosphingolipids, any comp…	.	136	141	159	57	49	82	96	81	91	57	84	73	99	159	155	141	628	679	677	-0.757094	0.207321	0.00362685	0.500872	0.194894	0.0501876	1.7223	0.165729	9.25014e-23	0.769366	0.322338	0.0835249
ENSG00000145349	CAMK2D	calcium/calmodulin dependent protein kinase II delta	An ion channel complex through which calcium ions pass. [GOC:mah];"Any process that modulates the extent of heart contraction, changing the force with which blood is propelled." [GOC:dph, GOC:tb, PMID:10358008];"Any process that stops, prevents or reduces the frequency, rate or extent of sodium ion transmembrane transport." [GOC:BHF, GOC:mtg_cardiac_conduct_nov11, GOC:rl, GOC:TermGenie, PMID:1859…	regulation of cellular localization;positive regulation of cardiac muscle hypertrophy	1111	1307	1205	500	303	1214	1245	1009	1126	756	1931	2068	1970	1589	1402	1647	4358	4486	4342	0.418957	0.116812	0.00438278	0.49537	0.115929	0.000282795	1.10925	0.111412	6.60966e-21	0.703279	0.126265	2.49303e-06
ENSG00000108861	DUSP3	dual specificity phosphatase 3	Any process that stops, prevents, or reduces the frequency, rate or extent of signal transduction mediated by the JNK cascade. [GOC:bf];"That part of the nuclear content other than the chromosomes or the nucleolus." [GOC:ma, ISBN:0124325653];"The process of removing one or more phosphoric (ester or anhydride) residues from a molecule." [ISBN:0198506732];"Interacting selectively and non-covalently…	negative regulation of JNK cascade;MAP kinase phosphatase activity;inactivation of MAPK activity;protein tyrosine/serine/threonine phosphatase activity;positive regulation of mitotic cell cycle;negative regulation of MAPK cascade	1490	1644	1551	515	306	1331	1618	1368	1444	896	2160	2118	2258	1922	1661	2045	5386	5379	5491	0.264151	0.161469	0.268921	0.486062	0.163081	0.0188679	1.12209	0.161233	2.87524e-10	0.666214	0.154411	0.000518819
ENSG00000171155	C1GALT1C1	.	.	TN POLYAGGLUTINATION SYNDROME	399	446	380	200	83	377	357	295	342	239	926	986	946	513	383	575	811	949	909	1.00315	0.107385	8.02751e-18	0.479944	0.128913	0.00208953	0.456176	0.110625	0.000631681	0.666217	0.121007	3.37049e-06
ENSG00000177192	PUS1	pseudouridylate synthase 1	A membrane-bounded organelle of eukaryotic cells in which chromosomes are housed and replicated. In most cells, the nucleus contains all of the cell's chromosomes except the organellar chromosomes, and is the site of RNA synthesis and processing. In some species, or in specialized cell types, RNA metabolism or DNA replication may be absent. [GOC:go_curators];"A semiautonomous, self replicating or…	Mitochondrial myopathy and sideroblastic anemia;MYOPATHY LACTIC ACIDOSIS AND SIDEROBLASTIC ANEMIA 1	650	668	634	191	104	587	769	460	486	430	316	209	227	769	686	814	817	732	601	-1.51657	0.224101	1.78601e-09	0.479933	0.204186	0.078989	-0.481471	0.209463	0.0924972	-0.279059	0.280223	0.507037
ENSG00000243244	STON1	stonin 1	All of the contents of a cell excluding the plasma membrane and nucleus, but including other subcellular structures. [ISBN:0198547684];"A vesicle-mediated transport process in which cells take up external materials or membrane constituents by the invagination of a small region of the plasma membrane to form a new membrane-bounded vesicle." [GOC:mah, ISBN:0198506732, ISBN:0716731363];"Any process …	.	295	370	330	90	76	295	397	299	377	274	849	871	909	455	372	476	614	649	641	1.03092	0.230373	0.000205725	0.469767	0.23593	0.151072	0.134282	0.232585	0.713236	0.594297	0.185557	0.0148888
ENSG00000135736	CCDC102A	coiled-coil domain containing 102A	A protein complex, formed of one or more myosin heavy chains plus associated light chains and other proteins, that functions as a molecular motor; uses the energy of ATP hydrolysis to move actin filaments or to move vesicles or other cargo on fixed actin filaments; has magnesium-ATPase activity and binds actin. Myosin classes are distinguished based on sequence features of the motor, or head, dom…	.	188	200	186	81	36	242	236	146	158	129	118	79	73	231	214	294	650	550	495	-1.3879	0.228213	9.857e-08	0.466859	0.198289	0.0783244	0.769509	0.188539	0.00073814	0.20585	0.297849	0.6607
ENSG00000165030	NFIL3	nuclear factor, interleukin 3 regulated	Any molecular function by which a gene product interacts selectively and non-covalently with DNA (deoxyribonucleic acid). [GOC:dph, GOC:jl, GOC:tb, GOC:vw];"The synthesis of RNA from a DNA template by RNA polymerase II, originating at an RNA polymerase II promoter. Includes transcription of messenger RNA (mRNA) and certain small nuclear RNAs (snRNAs)." [GOC:jl, GOC:txnOH, ISBN:0321000382];"Any pr…	negative regulation of transcription from RNA polymerase II promoter in response to UV-induced DNA damage	219	288	275	117	60	198	266	209	207	179	589	626	680	347	268	331	449	485	404	1.02521	0.145528	2.87591e-10	0.46506	0.149996	0.0138343	0.0771422	0.141318	0.728712	0.569406	0.162859	0.00699082
ENSG00000157483	MYO1E	myosin IE	The process whose specific outcome is the progression of the myeloid and lymphoid derived organ/tissue systems of the blood and other parts of the body over time, from formation to the mature structure. The site of hemopoiesis is variable during development, but occurs primarily in bone marrow or kidney in many adult vertebrates. [GOC:dgh, ISBN:0198506732];"A clathrin-coated, membrane-bounded int…	FOCAL SEGMENTAL GLOMERULOSCLEROSIS 6;negative regulation of endocytosis;Familial idiopathic steroid-resistant nephrotic syndrome with focal segmental hyalinosis	441	532	463	145	96	359	388	369	402	239	557	584	608	557	452	550	343	281	268	0.186526	0.132085	0.351581	0.457105	0.133995	0.00571674	-1.22932	0.143924	2.27937e-15	-0.025944	0.23851	0.952192
ENSG00000182670	TTC3	.	.	.	6576	7683	7327	2675	1579	4471	6920	5852	6685	4812	14207	14686	14084	8986	7440	8734	28557	31779	29631	0.783797	0.165967	7.40398e-05	0.454859	0.168566	0.0375565	1.39536	0.166907	9.97914e-15	0.923636	0.161972	1.31045e-06
ENSG00000183684	ALYREF	Aly/REF export factor	.	.	2839	3065	2628	1273	690	3921	2810	1931	2114	1438	1695	1664	1456	3478	2996	3885	5757	5144	4631	-1.07565	0.168749	1.85324e-08	0.451612	0.16695	0.0370205	0.147544	0.165595	0.572239	-0.0277288	0.22265	0.94456
ENSG00000173486	FKBP2	FK506 binding protein 2	The irregular network of unit membranes, visible only by electron microscopy, that occurs in the cytoplasm of many eukaryotic cells. The membranes form a complex meshwork of tubular channels, which are often expanded into slitlike cavities called cisternae. The ER takes two forms, rough (or granular), with ribosomes adhering to the outer surface, and smooth (with no ribosomes attached). [ISBN:019…	.	500	474	433	357	236	551	657	445	597	349	351	430	321	765	675	833	1128	986	1006	-1.00194	0.24091	0.000670822	0.45139	0.23313	0.164679	0.0258677	0.228719	0.948554	-0.0642656	0.233314	0.875629
ENSG00000162783	IER5	immediate early response 5	Interacting selectively and non-covalently with an identical protein or proteins. [GOC:jl];"Interacting selectively and non-covalently with any protein or protein complex (a complex of two or more proteins that may include other nonprotein molecules)." [GOC:go_curators]	.	778	773	698	325	167	720	482	371	426	322	846	827	941	781	683	833	2314	2133	1942	0.194439	0.157292	0.422477	0.445469	0.157426	0.0276689	1.02572	0.151555	9.99338e-10	0.592211	0.15027	0.0018243
ENSG00000070087	PFN2	profilin 2	Any process that activates or increases the frequency, rate or extent of the assembly of a stress fiber, a bundle of microfilaments and other proteins found in fibroblasts. [GOC:ai];"Any process that activates or increases the rate of ATP hydrolysis by an ATPase." [GOC:mah];"Any process that activates or increases the frequency, rate or extent of the assembly of actin filament bundles." [GOC:mah]…	positive regulation of peptidyl-serine phosphorylation;negative regulation of epithelial cell migration;positive regulation of actin filament bundle assembly;positive regulation of stress fiber assembly;negative regulation of ruffle assembly	6432	7246	6502	3524	2062	8569	5809	4567	4781	3419	7549	7594	7579	8751	6803	9136	27552	29670	26778	-0.10636	0.152808	0.667678	0.444363	0.156179	0.0266099	1.31941	0.148015	9.89726e-17	0.657995	0.209878	0.0176556
ENSG00000276550	HERC2P2	.	.	.	193	227	197	56	31	149	227	161	172	117	195	205	236	248	217	214	1142	1135	1031	-0.0869282	0.209309	0.80133	0.443461	0.208609	0.120879	1.81578	0.191285	5.24653e-19	0.938741	0.285129	0.0118661
ENSG00000122642	FKBP9	FK506 binding protein 9	Interacting selectively and non-covalently with calcium ions (Ca2+). [GOC:ai];"The irregular network of unit membranes, visible only by electron microscopy, that occurs in the cytoplasm of many eukaryotic cells. The membranes form a complex meshwork of tubular channels, which are often expanded into slitlike cavities called cisternae. The ER takes two forms, rough (or granular), with ribosomes ad…	.	937	1012	881	466	219	1277	893	917	870	534	1509	1601	1750	1367	1007	1277	792	807	777	0.410429	0.177089	0.0954031	0.434097	0.178677	0.0675918	-1.05901	0.174006	6.43008e-08	0.0740917	0.233227	0.854159
ENSG00000181004	BBS12	Bardet-Biedl syndrome 12	The bidirectional movement of large protein complexes along microtubules within a cilium, mediated by motor proteins. [GOC:cilia, GOC:kmv, PMID:17981739, PMID:18180368, PMID:22869374];"The aggregation, arrangement and bonding together of a set of components to form a protein complex, mediated by chaperone molecules that do not form part of the finished complex." [GOC:ai];"Any process preventing t…	Bardet-Biedl syndrome type 12 (BBS12);chaperone-mediated protein complex assembly;BARDET-BIEDL SYNDROME 12;BARDET-BIEDL SYNDROME;negative regulation of fat cell differentiation	197	210	180	68	43	155	129	139	151	112	406	451	479	236	163	230	507	587	588	1.08327	0.125538	2.87418e-15	0.433937	0.140789	0.014515	0.966629	0.121715	2.62879e-13	0.854546	0.129203	8.89334e-09
ENSG00000102181	CD99L2	CD99 molecule like 2	The component of a membrane consisting of the gene products and protein complexes having at least some part of their peptide sequence embedded in the hydrophobic region of the membrane. [GOC:dos, GOC:go_curators];"Interacting selectively and non-covalently with any protein or protein complex (a complex of two or more proteins that may include other nonprotein molecules)." [GOC:go_curators];"The m…	.	837	849	734	216	149	628	341	295	299	144	1833	1763	1766	716	531	693	1709	1822	1687	1.42637	0.294961	4.55328e-05	0.433379	0.304406	0.332958	0.960522	0.299878	0.0119916	1.00291	0.220965	0.00023325
ENSG00000113522	RAD50	RAD50 double strand break repair protein	That part of the nuclear content other than the chromosomes or the nucleolus. [GOC:ma, ISBN:0124325653];"A highly compacted molecule of DNA and associated proteins resulting in a cytologically distinct nuclear chromosome." [GOC:elh];"The process of restoring DNA after damage. Genomes are subject to damage by chemical and physical agents in the environment (e.g. UV and ionizing radiations, chemica…	telomeric 3' overhang formation;double-strand break repair;ATP-dependent DNA helicase activity;positive regulation of telomere maintenance;NIJMEGEN BREAKAGE SYNDROME-LIKE DISORDER;Hereditary breast and ovarian cancer syndrome;DNA duplex unwinding	644	849	811	301	190	410	765	660	757	523	1003	1077	987	993	876	829	407	375	360	0.172971	0.20052	0.591798	0.430075	0.207023	0.131308	-1.68152	0.203636	2.26374e-14	-0.103866	0.289449	0.833705
ENSG00000248008	NRAV	.	.	.	125	99	115	50	42	106	143	128	116	83	203	243	252	161	128	178	511	544	597	0.557115	0.21045	0.0496246	0.417178	0.212518	0.157996	1.34661	0.197758	7.67525e-10	0.827244	0.188389	0.000393096
ENSG00000164983	TMEM65	transmembrane protein 65	A semiautonomous, self replicating organelle that occurs in varying numbers, shapes, and sizes in the cytoplasm of virtually all eukaryotic cells. It is notably the site of tissue respiration. [GOC:giardia, ISBN:0198506732];"The component of a membrane consisting of the gene products and protein complexes having at least some part of their peptide sequence embedded in the hydrophobic region of th…	.	927	1081	972	733	388	1065	908	668	860	671	1660	1666	1774	1309	1136	1453	3981	4534	4040	0.344546	0.197495	0.234239	0.395626	0.200038	0.15435	1.1866	0.192178	3.83334e-08	0.687434	0.173982	0.00176789
ENSG00000169764	UGP2	UDP-glucose pyrophosphorylase 2	Interacting selectively and non-covalently with an identical protein or proteins. [GOC:jl];"The chemical reactions and pathways involving UDP-glucose, uridinediphosphoglucose, a substance composed of glucose in glycosidic linkage with uridine diphosphate." [GOC:ai];"The chemical reactions and pathways resulting in the formation of UDP-glucuronate, a substance composed of glucuronic acid in glycos…	.	3403	4083	3633	2429	1326	5079	4845	3759	4563	3135	2590	2911	2730	6066	4537	6019	4272	4444	4009	-1.04559	0.202186	1.02683e-05	0.381101	0.203928	0.182011	-0.875895	0.197833	0.000197974	-0.360578	0.240053	0.300231
ENSG00000172602	RND1	Rho family GTPase 1	A process that is carried out at the cellular level which results in the assembly, arrangement of constituent parts, or disassembly of cytoskeletal structures comprising actin filaments. Includes processes that control the spatial distribution of actin filaments, such as organizing filaments into meshworks, bundles, or other structures, as by cross-linking. [GOC:mah];"The membrane surrounding a c…	.	212	235	202	53	35	99	115	97	97	56	221	184	211	164	158	176	704	696	658	0.241988	0.246167	0.536678	0.376544	0.250241	0.303119	1.50992	0.23573	9.67739e-09	0.824518	0.238223	0.00771814
ENSG00000141504	SAT2	.	.	.	196	168	181	79	43	254	156	98	163	95	190	236	161	210	183	228	695	703	663	-0.137271	0.216663	0.690157	0.374839	0.20333	0.189216	1.20641	0.188803	1.06241e-08	0.582851	0.219708	0.0505754
ENSG00000268043	NBPF12	neuroblastoma breakpoint family member 12	.	.	386	473	429	109	55	272	231	198	252	184	196	179	173	348	356	361	346	312	333	-1.01345	0.208049	3.95728e-05	0.368463	0.20807	0.211133	-0.620625	0.205066	0.0191067	-0.296709	0.227866	0.375934
ENSG00000270069	MIR222HG	.	.	.	283	278	283	91	63	188	160	106	151	84	113	129	102	244	229	237	177	202	178	-1.09876	0.217242	1.73589e-05	0.364013	0.207499	0.2158	-0.867244	0.205606	0.000442118	-0.382667	0.24604	0.283161
ENSG00000133640	LRRIQ1	leucine rich repeats and IQ motif containing 1	.	.	115	111	104	45	43	54	75	57	67	50	346	354	366	106	93	119	398	460	429	1.64047	0.204265	3.09344e-13	0.353714	0.225576	0.278581	1.47233	0.199043	1.43657e-11	1.23061	0.222305	2.92525e-06
ENSG00000110104	CCDC86	coiled-coil domain containing 86	A membrane-bounded organelle of eukaryotic cells in which chromosomes are housed and replicated. In most cells, the nucleus contains all of the cell's chromosomes except the organellar chromosomes, and is the site of RNA synthesis and processing. In some species, or in specialized cell types, RNA metabolism or DNA replication may be absent. [GOC:go_curators];"A small, dense body one or more of wh…	.	572	606	608	257	135	514	685	456	540	331	322	228	267	647	640	709	976	875	775	-1.37181	0.154337	3.67125e-16	0.345411	0.134553	0.0504494	-0.153688	0.133108	0.449347	-0.22879	0.236303	0.520448
ENSG00000214189	ZNF788	.	.	.	1463	1644	1336	425	192	877	1069	1118	1109	779	840	847	762	1472	1076	1590	645	697	634	-0.825221	0.20833	0.00132301	0.343556	0.215765	0.26998	-1.58193	0.210851	6.9386e-12	-0.457112	0.277218	0.252881
ENSG00000099800	TIMM13	translocase of inner mitochondrial membrane 13	A small, dense body one or more of which are present in the nucleus of eukaryotic cells. It is rich in RNA and protein, is not bounded by a limiting membrane, and is not seen during mitosis. Its prime function is the transcription of the nucleolar DNA into 45S ribosomal-precursor RNA, the processing of this RNA into 5.8S, 18S, and 28S components of ribosomal RNA, and the association of these comp…	.	1027	1147	1049	455	288	1670	1560	933	1024	876	873	629	584	1449	1290	1529	2233	2054	1601	-1.10585	0.234469	7.5323e-05	0.338674	0.220166	0.289691	-0.0872419	0.224612	0.812153	-0.169625	0.230893	0.638134
ENSG00000144589	STK11IP	serine/threonine kinase 11 interacting protein	All of the contents of a cell excluding the plasma membrane and nucleus, but including other subcellular structures. [ISBN:0198547684];"Interacting selectively and non-covalently with a protein kinase, any enzyme that catalyzes the transfer of a phosphate group, usually from ATP, to a protein substrate." [GOC:jl];"Any process in which a protein is transported to, or maintained in, a specific loca…	.	171	155	134	30	42	116	136	114	114	71	213	174	211	154	155	142	723	704	659	0.297015	0.194599	0.309226	0.338179	0.198965	0.233351	1.63618	0.168561	7.12388e-20	0.8882	0.241666	0.00416203
ENSG00000102362	SYTL4	synaptotagmin like 4	Interacting selectively and non-covalently with calcium ions (Ca2+). [GOC:ai];"Any process that stops, prevents, or reduces the frequency, rate or extent of the regulated release of insulin." [GOC:ai];"Interacting selectively and non-covalently with phospholipids, a class of lipids containing phosphoric acid as a mono- or diester, in the presence of calcium." [GOC:jl];"That part of the nuclear co…	ubiquitin-independent protein catabolic process via the multivesicular body sorting pathway;positive regulation of protein secretion;positive regulation of exocytosis	136	220	148	65	46	133	99	85	110	79	445	484	538	151	141	184	106	105	94	1.51023	0.167486	1.30822e-16	0.338014	0.181247	0.182987	-1.18143	0.178929	2.8585e-09	0.571602	0.335145	0.234611
ENSG00000161179	YDJC	YdjC homolog (bacterial)	Catalysis of the hydrolysis of any carbon-nitrogen bond, C-N, with the exception of peptide bonds. [GOC:jl];"The chemical reactions and pathways involving carbohydrates, any of a group of organic compounds based of the general formula Cx(H2O)y. Includes the formation of carbohydrate derivatives by the addition of a carbohydrate residue to another molecule." [GOC:mah, ISBN:0198506732];"Interacting…	.	217	178	193	64	44	288	214	136	153	119	120	117	89	210	206	254	336	241	237	-1.11421	0.232791	5.68473e-05	0.336589	0.219238	0.290681	-0.268288	0.225218	0.432562	-0.231482	0.232158	0.506427
ENSG00000141385	AFG3L2	AFG3 like matrix AAA peptidase subunit 2	De novo generation of a long process of a neuron, that carries efferent (outgoing) action potentials from the cell body towards target cells. Refers to the morphogenesis or creation of shape or form of the developing axon. [GOC:dph, GOC:jid, GOC:pg, GOC:pr, ISBN:0198506732];"The assembly of cristae, the inwards folds of the inner mitochondrial membrane." [GOC:jl, ISBN:0198506732];"Interacting sel…	Early-onset spastic ataxia-neuropathy syndrome;Ataxia spastic 5 autosomal recessive;Spinocerebellar ataxia type 28;SPINOCEREBELLAR ATAXIA 28;SPASTIC ATAXIA 5 AUTOSOMAL RECESSIVE	2796	3206	2793	1242	723	3367	3496	2811	3043	2160	1752	1911	1920	3865	3107	3871	4904	5051	4932	-1.05453	0.171747	7.03153e-08	0.325071	0.171139	0.174195	-0.102271	0.168432	0.69946	-0.172157	0.205127	0.584736
ENSG00000169439	SDC2	syndecan 2	The external part of the cell wall and/or plasma membrane. [GOC:jl, GOC:mtg_sensu, GOC:sm];"Any process that modulates the frequency, rate or extent of dendrite morphogenesis." [GOC:ai];"Interacting selectively and non-covalently with any protein or protein complex (a complex of two or more proteins that may include other nonprotein molecules)." [GOC:go_curators];"The controlled self-propelled mo…	.	3452	3913	3431	1267	772	2183	1791	1480	1642	1203	2346	2534	2561	3058	2509	3127	10695	11240	11048	-0.332216	0.197642	0.253944	0.319832	0.201229	0.271102	1.34459	0.196689	6.45585e-10	0.594195	0.247044	0.0808654
ENSG00000142459	EVI5L	.	.	.	42	60	56	19	18	61	70	63	51	37	138	94	89	68	68	66	299	297	282	0.531063	0.257694	0.147899	0.31872	0.248772	0.392269	1.52669	0.212152	5.90057e-11	0.886818	0.233315	0.00281904
ENSG00000121005	CRISPLD1	cysteine rich secretory protein LCCL domain containing 1	Elemental activities, such as catalysis or binding, describing the actions of a gene product at the molecular level. A given gene product may exhibit one or more molecular functions. [GOC:go_curators];"The process in which the anatomical structures of the face are generated and organized. The face is the ventral division of the head." [GOC:dph];"A membrane-bounded vesicle that is released into th…	face morphogenesis	1099	1309	1098	593	316	984	733	635	647	530	1245	1369	1435	1144	1039	1177	4099	4301	4175	0.141963	0.163246	0.588536	0.313062	0.162897	0.168533	1.31883	0.155009	3.01922e-15	0.674859	0.198106	0.00900764
ENSG00000120800	UTP20	UTP20, small subunit processome component	Endonucleolytic cleavage between the SSU-rRNA and the 5.8S rRNA of an rRNA molecule originally produced as a tricistronic rRNA transcript that contained the Small SubUnit (SSU) rRNA, the 5.8S rRNA, and the Large SubUnit (LSU) rRNA, in that order, from 5' to 3' along the primary transcript. [GOC:curators, PMID:10690410];"A small, dense body one or more of which are present in the nucleus of eukary…	rRNA processing	4874	5550	5183	1791	1089	3395	4617	3306	3860	2814	2475	2540	2492	5057	4669	5250	7457	7183	6974	-1.11842	0.110695	7.42209e-21	0.313049	0.112585	0.0311719	-0.0499547	0.109704	0.77658	-0.170234	0.200355	0.579373
ENSG00000110013	SIAE	sialic acid acetylesterase	Catalysis of the reaction: N-acetyl-O-acetylneuraminate (free or glycosidically bound) + H2O = N-acetylneuraminate + acetate. [EC:3.1.1.53, PMID:1991039];"Any process that modulates the frequency, rate, or extent of an immune system process." [GOC:add];"The chemical reactions and pathways involving carbohydrates, any of a group of organic compounds based of the general formula Cx(H2O)y. Includes …	regulation of immune system process;AUTOIMMUNE DISEASE SUSCEPTIBILITY TO 6	185	202	202	82	62	148	143	120	121	67	406	452	460	190	143	228	634	687	744	1.10586	0.150255	3.54547e-11	0.310647	0.174468	0.208318	1.30601	0.146755	1.11211e-16	0.953488	0.174918	4.35674e-06
ENSG00000183579	ZNRF3	zinc and ring finger 3	Any process that stops, prevents, or reduces the frequency, rate or extent of non-canonical Wnt signaling pathway. [GOC:obol, GOC:yaf];"Catalysis of the joining of two substances, or two groups within a single molecule, with the concomitant hydrolysis of the diphosphate bond in ATP or a similar triphosphate." [EC:6, GOC:mah];"The chemical reactions and pathways resulting in the breakdown of a pro…	proteasome-mediated ubiquitin-dependent protein catabolic process;negative regulation of non-canonical Wnt signaling pathway;negative regulation of canonical Wnt signaling pathway;Wnt receptor catabolic process	736	839	762	202	119	490	418	340	372	257	672	579	601	568	572	637	2635	2600	2280	-0.0768728	0.20074	0.817614	0.301935	0.204915	0.314535	1.47155	0.197848	1.08931e-11	0.710865	0.244426	0.0299131
ENSG00000100084	HIRA	histone cell cycle regulator	The cellular synthesis of RNA on a template of DNA. [GOC:jl, GOC:txnOH];"That part of the nuclear content other than the chromosomes or the nucleolus." [GOC:ma, ISBN:0124325653];"The process in which a relatively unspecialized cell acquires specialized features of a muscle cell." [CL:0000187, GOC:go_curators];"A class of nuclear body; they react against SP100 auto-antibodies (PML, promyelocytic l…	22q11.2 Deletion Syndrome	304	318	326	144	70	256	253	157	169	189	188	156	126	296	303	302	536	443	325	-1.07078	0.182684	3.3671e-07	0.297872	0.16315	0.194603	-0.0692031	0.178021	0.812001	-0.179407	0.214311	0.58571
ENSG00000174233	ADCY6	adenylate cyclase 6	Any process that results in a change in state or activity of a cell (in terms of movement, secretion, enzyme production, gene expression, etc.) as a result of a forskolin stimulus. [GO_REF:0000071, GOC:TermGenie, PMID:15937517];"The component of the plasma membrane consisting of the gene products and protein complexes having either part of their peptide sequence embedded in the hydrophobic region…	LETHAL CONGENITAL CONTRACTURE SYNDROME 8;Hypomyelination neuropathy-arthrogryposis syndrome;negative regulation of vasodilation	923	920	938	184	127	628	792	574	654	490	864	855	880	854	770	799	2693	2530	2610	-0.0495055	0.220815	0.896401	0.287124	0.225484	0.395804	1.07377	0.22269	3.74676e-05	0.512281	0.202521	0.0639798
ENSG00000136720	HS6ST1	heparan sulfate 6-O-sulfotransferase 1	The process whose specific outcome is the progression of the alveolus over time, from its formation to the mature structure. The alveolus is a sac for holding air in the lungs; formed by the terminal dilation of air passageways. [GOC:mtg_lung, PMID:9751757];"Blood vessel formation when new vessels emerge from the proliferation of pre-existing blood vessels." [ISBN:0878932453];"Catalysis of the tr…	HYPOGONADOTROPIC HYPOGONADISM 15 WITH OR WITHOUT ANOSMIA;Kallmann Syndrome;central nervous system neuron development;Normosmic congenital hypogonadotropic hypogonadism	567	642	611	128	100	427	464	293	334	234	540	532	520	454	495	507	2032	1863	1689	-0.0417858	0.188818	0.897593	0.273141	0.19739	0.349327	1.30059	0.188184	3.93087e-10	0.623646	0.221049	0.0358451
ENSG00000125355	TMEM255A	transmembrane protein 255A	The component of a membrane consisting of the gene products and protein complexes having at least some part of their peptide sequence embedded in the hydrophobic region of the membrane. [GOC:dos, GOC:go_curators]	.	26	29	32	17	16	17	19	22	26	11	216	215	215	32	29	30	106	109	75	2.6064	0.249731	2.84796e-22	0.269007	0.316318	0.589318	1.03083	0.277368	0.00261117	1.5349	0.356874	0.000545962
ENSG00000154310	TNIK	TRAF2 and NCK interacting kinase	Catalysis of the phosphorylation of an amino acid residue in a protein, usually according to the reaction: a protein + ATP = a phosphoprotein + ADP. [MetaCyc:PROTEIN-KINASE-RXN];"That part of the nuclear content other than the chromosomes or the nucleolus." [GOC:ma, ISBN:0124325653];"Any process that modulates the frequency, rate or extent of dendrite morphogenesis." [GOC:ai];"The process of intr…	microvillus assembly;activation of JNKK activity;positive regulation of protein phosphorylation;negative regulation of establishment of protein localization to plasma membrane;positive regulation of defense response to virus by host;MENTAL RETARDATION AUTOSOMAL RECESSIVE 54;regulation of microtubule cytoskeleton organization	271	351	319	184	137	243	365	288	342	199	657	619	730	374	415	350	3500	3677	3343	0.6239	0.200761	0.0166573	0.265747	0.211909	0.404503	2.54833	0.188456	1.05604e-38	1.43998	0.331397	0.000464342
ENSG00000189184	PCDH18	protocadherin 18	The component of a membrane consisting of the gene products and protein complexes having at least some part of their peptide sequence embedded in the hydrophobic region of the membrane. [GOC:dos, GOC:go_curators];"Interacting selectively and non-covalently with calcium ions (Ca2+)." [GOC:ai];"Interacting selectively and non-covalently with any protein or protein complex (a complex of two or more …	.	5326	5756	5158	2328	1425	5310	3687	3125	3068	2016	11602	12258	13024	5437	4333	5227	5397	5140	4942	1.11808	0.152934	5.03184e-11	0.265669	0.153773	0.22445	-0.572062	0.148431	0.0016361	0.422583	0.236441	0.21138
ENSG00000185567	AHNAK2	AHNAK nucleoprotein 2	Regular periodic sub membranous arrays of vinculin in skeletal and cardiac muscle cells, these arrays link Z-discs to the sarcolemma and are associated with links to extracellular matrix. [GOC:jl, GOC:mtg_muscle, ISBN:0198506732, PMID:6405378];"Platelike region of a muscle sarcomere to which the plus ends of actin filaments are attached." [GOC:mtg_muscle, ISBN:0815316194];"The membrane surroundin…	.	281	316	308	71	57	158	155	142	162	137	379	320	298	241	223	234	168	176	181	0.333952	0.20371	0.267781	0.264547	0.205204	0.389163	-1.02445	0.205167	1.71615e-05	-0.0223549	0.22749	0.957175
ENSG00000144821	MYH15	myosin heavy chain 15	The process whose specific outcome is the progression of the extraocular skeletal muscle over time, from its formation to the mature structure. The extraocular muscle is derived from cranial mesoderm and controls eye movements. The muscle begins its development with the differentiation of the muscle cells and ends with the mature muscle. An example of this process is found in Mus musculus. [GOC:d…	.	97	106	105	47	37	53	59	51	78	28	52	39	65	106	62	106	530	572	574	-0.941612	0.289247	0.0113866	0.25843	0.278917	0.551981	1.97238	0.234985	7.64992e-15	0.842181	0.383142	0.114596
ENSG00000103174	NAGPA	N-acetylglucosamine-1-phosphodiester alpha-N-acetylglucosaminidase	The component of a membrane consisting of the gene products and protein complexes having at least some part of their peptide sequence embedded in the hydrophobic region of the membrane. [GOC:dos, GOC:go_curators];"The lipid bilayer surrounding any of the thin, flattened compartments that form the central portion of the Golgi complex." [GOC:ecd, GOC:mah];"The controlled release of lysosomal enzyme…	.	280	226	256	57	38	199	255	117	179	123	96	83	82	253	206	203	377	387	319	-1.4907	0.237897	3.42475e-08	0.255548	0.230214	0.468647	0.0708933	0.220968	0.847601	-0.198875	0.266046	0.632224
ENSG00000169122	FAM110B	family with sequence similarity 110 member B	All of the contents of a cell excluding the plasma membrane and nucleus, but including other subcellular structures. [ISBN:0198547684];"A semiautonomous, self replicating organelle that occurs in varying numbers, shapes, and sizes in the cytoplasm of virtually all eukaryotic cells. It is notably the site of tissue respiration." [GOC:giardia, ISBN:0198506732];"An intracellular structure that can c…	.	83	109	104	33	37	66	85	50	65	52	44	53	67	79	114	80	618	664	530	-0.920696	0.220866	0.000646449	0.248732	0.228081	0.477791	2.06186	0.15551	3.28952e-37	0.889732	0.379136	0.0899977
ENSG00000125629	INSIG2	insulin induced gene 2	Any process that decreases the frequency, rate or extent of the chemical reactions and pathways resulting in the formation of steroids, compounds with a 1,2,cyclopentanoperhydrophenanthrene nucleus. [GOC:BHF, GOC:tb];"A series of molecular signals from the endoplasmic reticulum to the nucleus generated as a consequence of decreased levels of one or more sterols (and in some yeast, changes in oxyg…	.	273	328	326	156	114	254	266	240	350	250	783	1151	778	375	335	350	594	563	512	1.13993	0.203754	1.33975e-06	0.244914	0.187854	0.382848	0.00772449	0.179103	0.980725	0.54195	0.205789	0.0524725
ENSG00000092850	TEKT2	tektin 2	The aggregation, arrangement and bonding together of a set of components to form an axonemal dynein inner arm, an inner arm structure present on the outer doublet microtubules of ciliary and flagellar axonemes. [GOC:BHF, GOC:vk, PMID:19944400];"Any process involved in the controlled movement of a sperm cell." [GOC:jl];"All of the contents of a cell excluding the plasma membrane and nucleus, but i…	.	71	86	72	25	17	89	44	28	45	24	179	125	108	73	58	62	409	331	361	0.867901	0.277453	0.0158548	0.23536	0.27422	0.58543	1.82833	0.243448	6.57965e-12	1.12017	0.268584	0.000867936
ENSG00000167323	STIM1	.	.	Combined immunodeficiency due to STIM1 deficiency	158	166	172	66	43	146	231	215	200	95	428	410	424	192	198	195	747	678	710	0.868753	0.243183	0.00455174	0.223852	0.252695	0.572013	1.17729	0.241238	2.86728e-05	0.810716	0.192067	0.000723528
ENSG00000060069	CTDP1	.	.	CONGENITAL CATARACTS FACIAL DYSMORPHISM AND NEUROPATHY	250	315	244	126	73	382	299	131	202	188	209	129	122	286	260	324	434	299	301	-1.10493	0.248924	0.000236889	0.22354	0.219403	0.510984	-0.410465	0.228477	0.20536	-0.334867	0.228017	0.31258
ENSG00000128567	PODXL	podocalyxin like	The movement of a leukocyte within or between different tissues and organs of the body. [GOC:add, ISBN:0781735149, PMID:14680625, PMID:14708592, PMID:7507411, PMID:8600538];"A process that modulates the formation of a microvillus." [GOC:mah];"The attachment of a cell, either to another cell or to an underlying substrate such as the extracellular matrix, via cell adhesion molecules." [GOC:hb, GOC:…	.	4609	5365	5429	1269	732	3022	3592	3232	3658	2447	5231	5407	4865	4202	4296	3888	2374	2308	2310	0.0965964	0.192008	0.757099	0.220173	0.201059	0.475285	-1.48649	0.195092	3.00782e-12	-0.207247	0.254124	0.597232
ENSG00000100116	GCAT	glycine C-acetyltransferase	The chemical reactions and pathways involving amino acids, carboxylic acids containing one or more amino groups, as carried out by individual cells. [CHEBI:33709, GOC:curators, ISBN:0198506732];"The chemical reactions and pathways resulting in the breakdown of L-threonine (the L-enantiomer of 2-amino-3-hydroxybutyric acid) to form to form 2-amino-3-oxobutanoate, which is subsequently converted to…	.	660	610	584	166	92	740	498	349	359	273	306	239	182	541	475	596	1178	1053	904	-1.33169	0.243425	2.47622e-06	0.219608	0.222881	0.524574	0.284804	0.222955	0.395069	-0.108385	0.259669	0.80542
ENSG00000198804	MT-CO1	.	.	.	20750	19091	23729	8682	6007	14838	20050	16258	18293	10121	57538	51108	54590	22888	19236	19656	31624	31495	32154	1.16432	0.12903	1.26761e-16	0.21146	0.132614	0.269316	-0.0544953	0.125252	0.787007	0.53147	0.193857	0.0419398
ENSG00000164414	SLC35A1	solute carrier family 35 member A1	The directed movement of carbohydrate into, out of or within a cell, or between cells, by means of some agent such as a transporter or pore. Carbohydrates are any of a group of organic compounds based of the general formula Cx(H2O)y. [GOC:ai];"Enables the transfer of a CMP-N-acetylneuraminate from one side of the membrane to the other." [GOC:ai, GOC:mtg_transport, ISBN:0815340729];"The covalent a…	Congenital Disorders of Glycosylation;CONGENITAL DISORDER OF GLYCOSYLATION TYPE IIf MODIFIER OF;SLC35A1-CDG syndrome	116	167	131	100	56	180	176	158	168	121	473	643	562	225	147	193	302	359	309	1.32312	0.232673	8.55169e-07	0.21077	0.239721	0.575532	0.108693	0.225651	0.763478	0.650831	0.234539	0.0392704
ENSG00000221886	ZBED8	zinc finger BED-type containing 8	All of the contents of a cell excluding the plasma membrane and nucleus, but including other subcellular structures. [ISBN:0198547684];"Any molecular function by which a gene product interacts selectively and non-covalently with DNA (deoxyribonucleic acid)." [GOC:dph, GOC:jl, GOC:tb, GOC:vw];"Interacting selectively and non-covalently with any protein or protein complex (a complex of two or more …	.	250	303	224	142	89	501	236	204	232	160	939	940	978	314	270	342	695	802	783	1.3665	0.240684	8.94101e-07	0.208125	0.247508	0.593734	0.613247	0.242081	0.0587096	0.810197	0.213875	0.00292514
ENSG00000112773	FAM46A	family with sequence similarity 46 member A	Any process that modulates the frequency, rate or extent of gene expression. Gene expression is the process in which a gene's coding sequence is converted into a mature gene product or products (proteins or RNA). This includes the production of an RNA transcript as well as any processing to produce a mature RNA product or an mRNA (for protein-coding genes) and the translation of that mRNA into pr…	positive regulation of blood coagulation;negative regulation of gene expression epigenetic	471	516	417	357	216	668	471	356	365	287	691	704	707	621	508	577	1990	1947	1790	0.0695811	0.234529	0.860753	0.206664	0.236719	0.578531	1.05095	0.228168	9.552e-05	0.502884	0.198574	0.0635853
ENSG00000158352	SHROOM4	shroom family member 4	A process that is carried out at the cellular level which results in the assembly, arrangement of constituent parts, or disassembly of cytoskeletal structures comprising actin filaments. Includes processes that control the spatial distribution of actin filaments, such as organizing filaments into meshworks, bundles, or other structures, as by cross-linking. [GOC:mah];"A process that is carried ou…	X-linked intellectual disability Stocco Dos Santos type;STOCCO DOS SANTOS X-LINKED MENTAL RETARDATION SYNDROME (1 family)	154	195	197	73	57	126	205	195	274	124	352	312	369	229	206	194	1271	1188	1095	0.465245	0.252736	0.206644	0.202821	0.260108	0.620469	1.77572	0.245867	4.89262e-11	0.971448	0.267705	0.00480588
ENSG00000110851	PRDM4	PR/SET domain 4	Any molecular function by which a gene product interacts selectively and non-covalently with DNA (deoxyribonucleic acid). [GOC:dph, GOC:jl, GOC:tb, GOC:vw];"The synthesis of RNA from a DNA template by RNA polymerase II, originating at an RNA polymerase II promoter. Includes transcription of messenger RNA (mRNA) and certain small nuclear RNAs (snRNAs)." [GOC:jl, GOC:txnOH, ISBN:0321000382];"Cataly…	.	1096	1230	1205	241	197	634	663	565	578	359	983	1163	1081	847	748	869	2963	3218	3286	0.150239	0.216457	0.668739	0.200369	0.218895	0.557632	1.23755	0.217195	5.32172e-07	0.614924	0.209951	0.028757
ENSG00000168818	STX18	syntaxin 18	The component of a membrane consisting of the gene products and protein complexes having at least some part of their peptide sequence embedded in the hydrophobic region of the membrane. [GOC:dos, GOC:go_curators];"The irregular network of unit membranes, visible only by electron microscopy, that occurs in the cytoplasm of many eukaryotic cells. The membranes form a complex meshwork of tubular cha…	regulation of Golgi organization;positive regulation of organelle assembly;endoplasmic reticulum membrane organization;positive regulation of ER to Golgi vesicle-mediated transport	1037	1166	1044	724	415	1088	989	774	824	519	1128	1134	1150	1149	1032	1272	3932	3946	3819	-0.260726	0.185332	0.353495	0.190567	0.186947	0.510858	1.0539	0.17769	1.50959e-07	0.42031	0.208254	0.152631
ENSG00000198221	AFDN-AS1	.	.	.	61	61	54	18	8	47	31	30	31	24	223	270	237	52	37	48	56	79	76	2.13498	0.199471	1.79183e-23	0.190442	0.243215	0.619255	-0.0689944	0.231794	0.859283	1.09306	0.348217	0.0174744
ENSG00000135679	MDM2	.	.	ACCELERATED TUMOR FORMATION SUSCEPTIBILITY TO	5474	6291	5944	3192	1993	5002	5601	4136	4812	3291	3378	3401	3386	6180	5246	6666	11670	12381	11502	-1.07589	0.121004	3.66744e-16	0.18644	0.12235	0.29575	0.272626	0.11314	0.0750354	-0.0948053	0.201748	0.778199
ENSG00000155542	SETD9	SET domain containing 9	Catalysis of the transfer of a methyl group from S-adenosyl-L-methionine to the epsilon-amino group of a lysine residue. [GOC:mah];"Any process that modulates the frequency, rate or extent of signal transduction by p53 class mediator." [GOC:TermGenie];"That part of the nuclear content other than the chromosomes or the nucleolus." [GOC:ma, ISBN:0124325653];"The process in which a methyl group is c…	.	286	316	278	169	86	312	302	243	244	170	264	308	260	337	262	340	67	67	92	-0.420215	0.143779	0.0268448	0.186405	0.138189	0.363957	-2.72855	0.171271	5.70739e-54	-0.539044	0.3443	0.27978
ENSG00000179041	RRS1	ribosome biogenesis regulator homolog	The irregular network of unit membranes, visible only by electron microscopy, that occurs in the cytoplasm of many eukaryotic cells. The membranes form a complex meshwork of tubular channels, which are often expanded into slitlike cavities called cisternae. The ER takes two forms, rough (or granular), with ribosomes adhering to the outer surface, and smooth (with no ribosomes attached). [ISBN:019…	mitotic metaphase plate congression	460	539	502	311	183	500	436	256	312	347	246	235	163	508	411	621	504	457	374	-1.48201	0.226923	7.70589e-09	0.175944	0.215364	0.605757	-0.902581	0.207841	0.000275635	-0.56816	0.258532	0.114678
ENSG00000186166	CCDC84	coiled-coil domain containing 84	.	.	483	555	497	139	96	283	379	302	418	291	221	225	224	461	410	396	427	384	434	-1.1789	0.179131	5.75756e-09	0.16748	0.181595	0.554171	-0.743546	0.178388	0.000532724	-0.469953	0.213842	0.114678
ENSG00000144369	FAM171B	family with sequence similarity 171 member B	The component of a membrane consisting of the gene products and protein complexes having at least some part of their peptide sequence embedded in the hydrophobic region of the membrane. [GOC:dos, GOC:go_curators]	.	965	1107	947	509	290	808	867	686	737	490	1547	1653	1746	918	853	1058	3763	3993	3697	0.529666	0.103182	1.21944e-05	0.164839	0.105832	0.282618	1.28966	0.089387	3.7311e-44	0.722016	0.170732	0.000704565
ENSG00000174599	TRAM1L1	translocation associated membrane protein 1-like 1	The component of a membrane consisting of the gene products and protein complexes having at least some part of their peptide sequence embedded in the hydrophobic region of the membrane. [GOC:dos, GOC:go_curators];"The rough (or granular) endoplasmic reticulum (ER) has ribosomes adhering to the outer surface; the ribosomes are the site of translation of the mRNA for those proteins which are either…	.	85	102	97	71	31	139	114	111	101	72	309	374	344	108	112	138	288	386	335	1.212	0.227391	4.8462e-06	0.155918	0.240916	0.678779	0.749191	0.227495	0.0093493	0.766171	0.2004	0.0026285
ENSG00000214022	REPIN1	replication initiator 1	The cellular metabolic process in which a cell duplicates one or more molecules of DNA. DNA replication begins when specific sequences, known as origins of replication, are recognized and bound by initiation proteins, and ends when the original DNA molecule has been completely duplicated and the copies topologically separated. The unit of replication usually corresponds to the genome of the cell,…	.	725	757	679	130	101	694	552	389	373	256	563	424	490	533	506	570	2176	1952	1729	-0.406575	0.252071	0.276589	0.1461	0.250244	0.711506	1.0957	0.248952	0.000220167	0.409964	0.24742	0.250297
ENSG00000115963	RND3	Rho family GTPase 3	A process that is carried out at the cellular level which results in the assembly, arrangement of constituent parts, or disassembly of cytoskeletal structures comprising actin filaments and their associated proteins. [GOC:dph, GOC:jl, GOC:mah];"Catalysis of the reaction: GTP + H2O = GDP + phosphate." [ISBN:0198547684];"The attachment of a cell, either to another cell or to an underlying substrate…	.	1760	2060	1748	1072	636	2166	2147	1801	1809	1387	2426	2491	2499	2341	1718	2333	9569	10473	10227	-0.0761322	0.157915	0.768579	0.141442	0.162214	0.57897	1.4925	0.153522	6.23366e-20	0.676034	0.244308	0.0399035
ENSG00000164002	EXO5	exonuclease 5	Any molecular function by which a gene product interacts selectively and non-covalently with DNA (deoxyribonucleic acid). [GOC:dph, GOC:jl, GOC:tb, GOC:vw];"Interacting selectively and non-covalently with a 4 iron, 4 sulfur (4Fe-4S) cluster; this cluster consists of four iron atoms, with the inorganic sulfur atoms found between the irons and acting as bridging ligands." [GOC:ai, PMID:15952888, Wi…	interstrand cross-link repair	551	580	556	174	97	359	296	290	291	215	322	291	276	431	348	443	292	296	265	-0.746935	0.173651	0.000401377	0.138072	0.173512	0.614921	-1.25854	0.171447	2.13699e-11	-0.500626	0.215449	0.0933948
[truncated: 208 more rows]
